# Supplementary material for: Transcriptome-Wide N6-Methyladenosine (m6A) Methylation Analyses in a Compatible Wheat–Puccinia striiformis f. sp. tritici Interaction
Source: MDPI journal article supplement (doi:10.3390/plants13070982), 2024-03-29
Supplement: s1 [file s1]

## Supplementary Figures

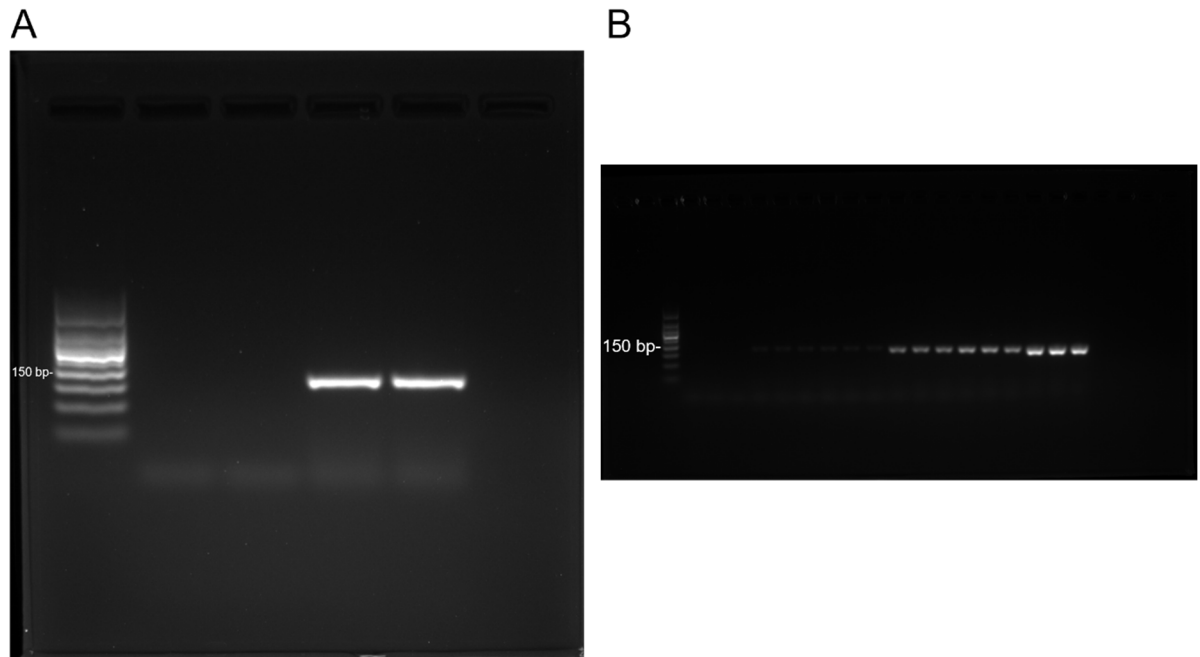

**Supplementary Figure S1.** Uncropped agarose gel (2.5%) electrophoresis pattern of semi-quantitative reverse transcription PCR (sqRT-PCR) product for *PsEF1*. (A) Agarose electrophoresis image of Figure 1D without cropping. (B) Agarose electrophoresis image of Figure 7B without cropping.

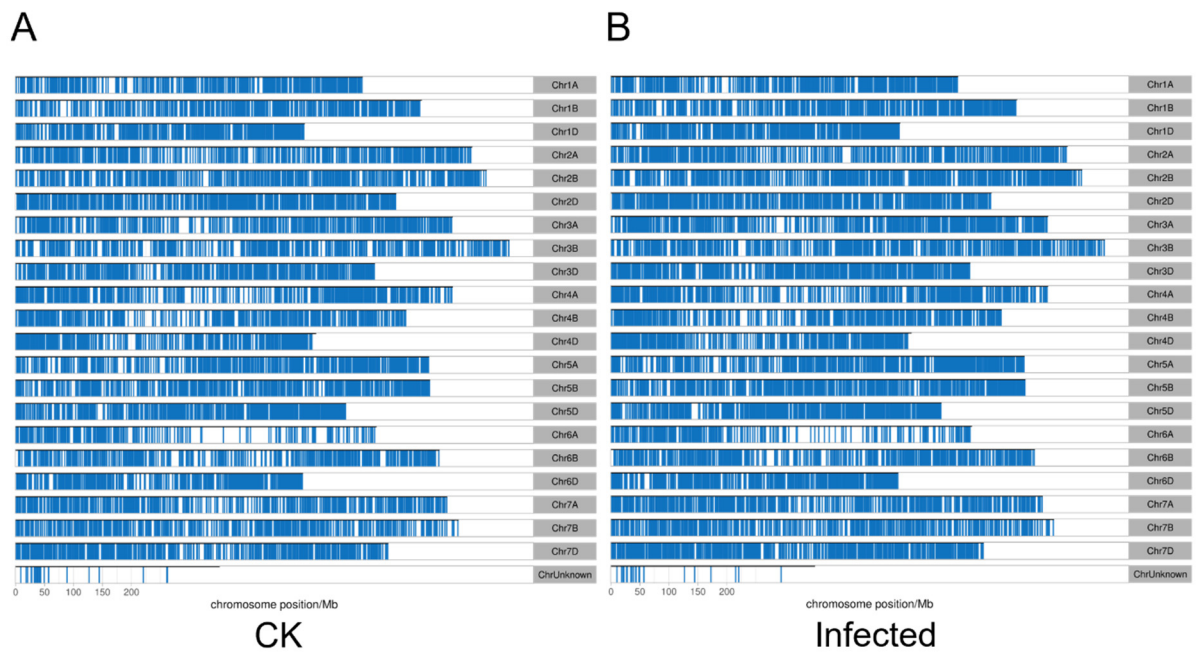

**Supplementary Figure S2.** Distribution and coverage of m<sup>6</sup>A peaks from CK sample (A) and infected sample (B) on wheat chromosome.

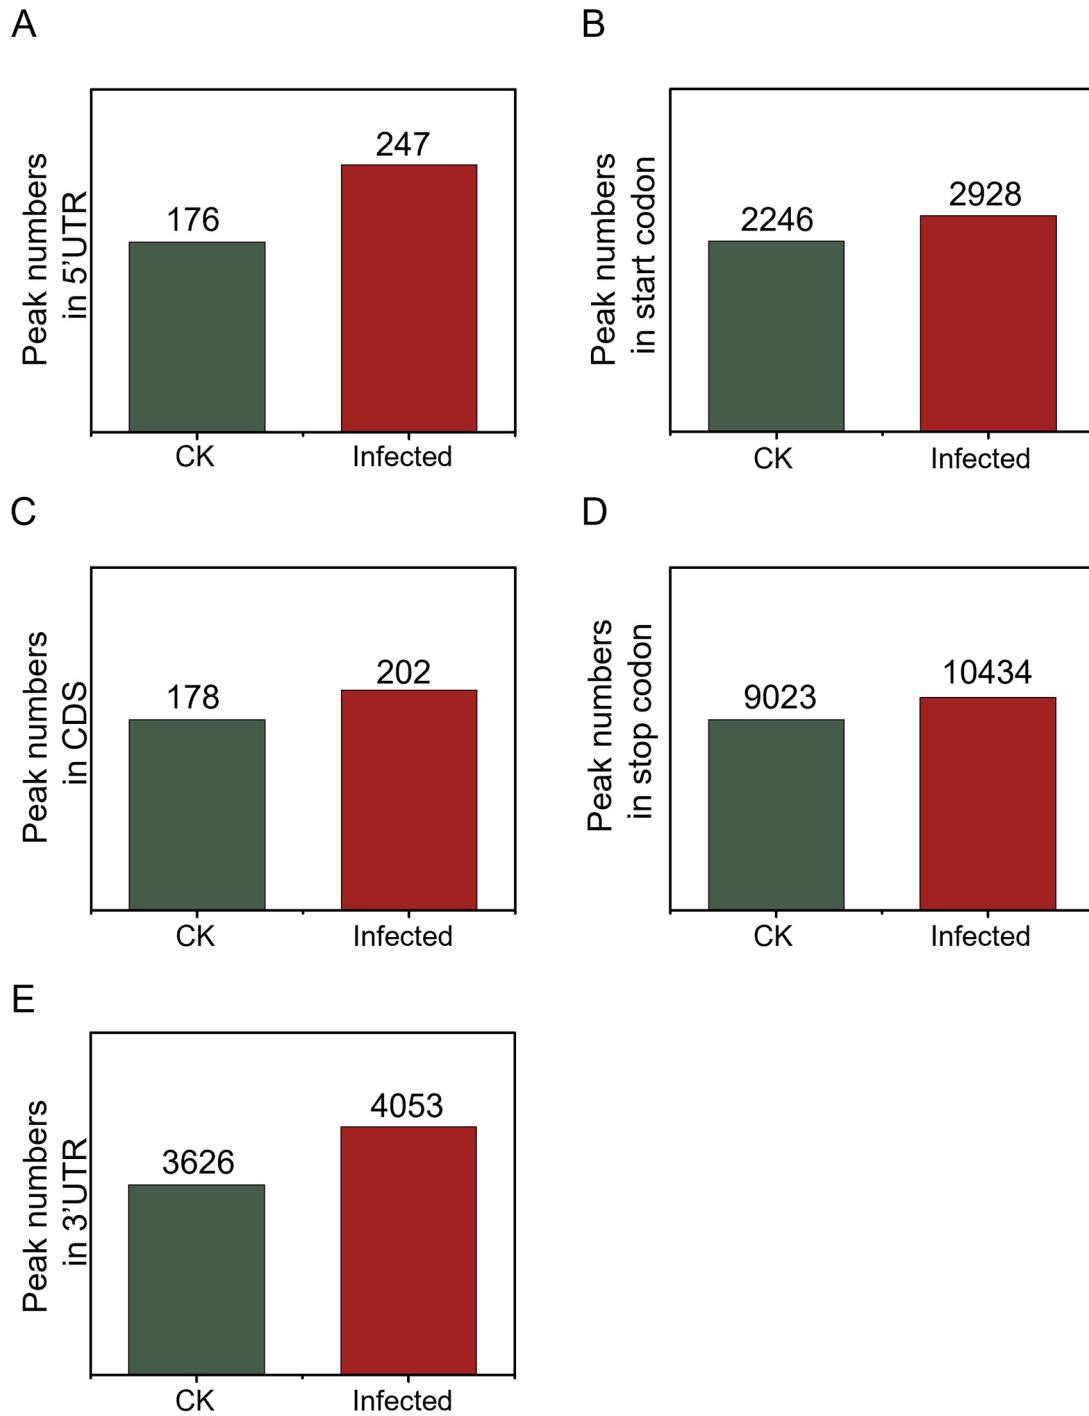

**Supplementary Figure S3.** Number of m<sup>6</sup>A peaks distributed within 5'UTR (untranslated region) (A), start codon (B), CDS (coding sequence) (C), stop codon (D) and 3'UTR (E) of genes in CK sample and infected sample.

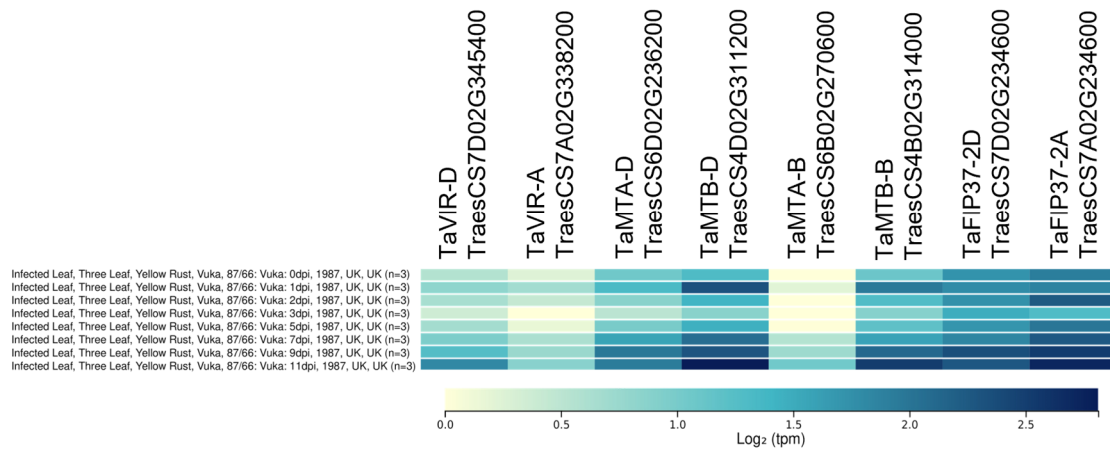

**Supplementary Figure S4.** The heatmap visualization of the expression levels of m6A writer genes in the wheat variety 'Vuka' when infected with Pst isolate 87/66, detected at 0, 1, 2, 3, 5, 7, 9, and 11 dpi, as logged in the Rust Expression Browser.
