# Supplementary material for: Transcriptome-Wide N6-Methyladenosine (m6A) Methylation Analyses in a Compatible Wheat–Puccinia striiformis f. sp. tritici Interaction
Source: Plants (Basel). 2024 Mar 29;13(7):982. doi: 10.3390/plants13070982 (PMC11013425; doi:10.3390/plants13070982)
Supplement: Supplementary file 1 [file plants-13-00982-s001.zip]

Archive with 5 entries (5 files):
- Supplementary Figures Cerav et al., 2024.pdf
- Supplementary Tables S1-S12 RNA-seq.xlsx
- Supplementary Tables S13-S29 MeRIP-seq.xlsx
- Supplementary Tables S30-S31 RNA-seq+MeRIP-seq.xlsx
- Supplementary Tables S32-S33 m6A regulators.xlsx
