# Supplementary material for: Transcriptome-Wide N6-Methyladenosine (m6A) Methylation Analyses in a Compatible Wheat–Puccinia striiformis f. sp. tritici Interaction
Source: Plants (Basel). 2024 Mar 29;13(7):982. doi: 10.3390/plants13070982 (PMC11013425; doi:10.3390/plants13070982)
Supplement: Supplementary file 1 [file plants-13-00982-s001.zip › Supplementary Tables S1-S12 RNA-seq.xlsx]

## Sheet: Table S1. RNA-seq data clean
Supplementary Table S1. Data filtering statistics of RNA-seq
Sample	Raw Data	Clean Data (%)	Adapter (%)	Low Quality (%)	poly A (%)	N (%)
CK-1_In	70977818	70835348 (99.80%)	17742 (0.02%)	124728 (0.18%)	0 (0.00%)	0 (0.00%)
CK-2_In	78417646	78258056 (99.80%)	21172 (0.03%)	138418 (0.18%)	0 (0.00%)	0 (0.00%)
Infected-1_In	71341020	71161260 (99.75%)	18810 (0.03%)	160950 (0.23%)	0 (0.00%)	0 (0.00%)
Infected-2_In	61430452	61311152 (99.81%)	14520 (0.02%)	104780 (0.17%)	0 (0.00%)	0 (0.00%)
Sample: sample name; Raw Data: number of raw reads after sequencing; Clean Data (%): number of high-quality reads and percentage (based on RawReads); Adapter (%): number of reads containing adapter and percentage (based on RawReads); Low Quality (%): low-quality reads, that is, the number and percentage (based on RawReads) of more than 50% of the reads with a base quality value Q≤20 in single rea…

## Sheet: Table S2. RNA-seq base Stats. 
Supplementary Table S2. Base information statistics of RNA-seq
Sample	Raw Data (bp)	Clean Data (bp)	AF_Q20 (%)	AF_Q30 (%)	AF_N (%)	AF_GC (%)
CK-1_In	10646672700	10609595524	10340921427 (97.47%)	9863636888 (92.97%)	168542 (0.00%)	5983356952 (56.40%)
CK-2_In	11762646900	11724505130	11370157117 (96.98%)	10782724071 (91.97%)	185841 (0.00%)	6652699112 (56.74%)
Infected-1_In	10701153000	10657316999	10329965048 (96.93%)	9783977731 (91.81%)	169402 (0.00%)	5800444028 (54.43%)
Infected-2_In	9214567800	9181940803	8951007631 (97.48%)	8541581551 (93.03%)	134900 (0.00%)	4908829948 (53.46%)
Sample: sample name; AF: After filter, sample base information after filtering; Raw Data (bp): Total number of bases in the sequencing data (unit bp); Clean Data (bp): The total number of high-quality data bases after filtering (unit bp); Q20 (%): The number of bases with a sequencing base quality value above Q20 and its percentage in Clean Data; Q30 (%): The number of bases with values above Q30…

## Sheet: Table S3. RNA-seq ribosome map
Supplementary Table S3. Ribosomal RNA mapping statistics of RNA-seq
Sample	Clean_Reads	Mapped_Reads (%)	Unmapped_Reads (%)
CK-1_In	70835348	5614132 ( 7.93% )	65221216 ( 92.07% )
CK-2_In	78258056	30087888 ( 38.45% )	48170168 ( 61.55% )
Infected-1_In	71161260	5020120 ( 7.05% )	66141140 ( 92.95% )
Infected-2_In	61311152	7314648 ( 11.93% )	53996504 ( 88.07% )
Sample: sample name; clean_reads: number of high-quality reads; Mapped_Reads (%): The number of reads and the percentage (based on cleand reads) of rRNA mapping in wheat reference genome; Unmapped_Reads (%): Number and percentage of reads that cannot match ribosomal RNA (based on cleand reads)

## Sheet: Table S4.RNA-seq genome map
Supplementary Table S4. Reference genome mapping statistics of RNA-seq
Sample	Total	Unmapped (%)	Unique_Mapped (%)	Multiple_Mapped (%)	Total_Mapped (%)
CK-1_In	65221216	3934220 (6.03%)	57505558 (88.17%)	3781438 (5.80%)	61286996 (93.97%)
CK-2_In	48170168	3261102 (6.77%)	41896412 (86.98%)	3012654 (6.25%)	44909066 (93.23%)
Infected-1_In	66141140	13948214 (21.09%)	49161270 (74.33%)	3031656 (4.58%)	52192926 (78.91%)
Infected-2_In	53996504	16815476 (31.14%)	35089094 (64.98%)	2091934 (3.87%)	37181028 (68.86%)
Sample: sample name; Total: The number of reads after filtering ribosomal RNA, called valid reads; Unmapped (%): The number of reads on the reference genome that is not mapped and the proportion of valid reads; Unique_Mapped (%): The number of reads uniquely mapped to the reference genome and the proportion of valid reads; Multiple_Mapped (%): The number of reads in the reference genome and the p…

## Sheet: Table S5. RNA-seq all annot.
Supplementary Table S5. All genes annotation of RNA-seq
id	CK-1_In_count	CK-2_In_count	Infected-1_In_count	Infected-2_In_count	CK-1_In_tpm	CK-2_In_tpm	Infected-1_In_tpm	Infected-2_In_tpm	CK_mean	Infected_mean	log2(fc)	p-value	FDR	Symbol	KEGG_A_class	KEGG_B_class	Pathway	K_ID	GO Component	GO Function	GO Process	TF_family
TraesCS2D03G0474500	138	81	7690	10135	3.733	2.882	267.555	515.234	3.3075	391.394	6.88674	2.08738e-106	2.02484e-101	ICL	Metabolism;Metabolism;Metabolism;Metabolism	Global and overview maps;Global and overview maps;Global and overview maps;Carbohydrate metabolism	ko01100//Metabolic pathways;ko01110//Biosynthesis of secondary metabolites;ko01200//Carbon metabolism;ko00630//Glyoxylate and dicarboxylate metabolism	K01637;K01637;K01637;K01637	GO:0005575//cellular_component;GO:0005576//extracellular region;GO:0005622//intracellular;GO:0005623//cell;GO:0005737//cytoplasm;GO:0005773//vacuole;GO:0005777//peroxisome;GO:0005782//peroxisomal matrix;GO:0009514//glyoxysome;GO:0031907//microbody lumen;GO:0031974//membrane-enclosed lumen;GO:0042579//microbody;GO:0043226//organelle;GO:0043227//membrane-bounded organelle;GO:0043229//intracellular …	GO:0003674//molecular_function;GO:0003824//catalytic activity;GO:0004451//isocitrate lyase activity;GO:0005488//binding;GO:0008807//carboxyvinyl-carboxyphosphonate phosphorylmutase activity;GO:0016829//lyase activity;GO:0016830//carbon-carbon lyase activity;GO:0016833//oxo-acid-lyase activity;GO:0033978//phosphonopyruvate hydrolase activity;GO:0043167//ion binding;GO:0043169//cation binding;GO:00…	GO:0005975//carbohydrate metabolic process;GO:0006081//cellular aldehyde metabolic process;GO:0006082//organic acid metabolic process;GO:0006083//acetate metabolic process;GO:0006091//generation of precursor metabolites and energy;GO:0006097//glyoxylate cycle;GO:0006099//tricarboxylic acid cycle;GO:0006101//citrate metabolic process;GO:0006629//lipid metabolic process;GO:0006631//fatty acid metab…	--
TraesCS2B03G0590100	71	42	5367	7565	1.853	1.442	180.182	371.046	1.6475	275.614	7.38623	7.93482e-104	3.84855e-99	ICL	Metabolism;Metabolism;Metabolism;Metabolism	Global and overview maps;Global and overview maps;Global and overview maps;Carbohydrate metabolism	ko01100//Metabolic pathways;ko01110//Biosynthesis of secondary metabolites;ko01200//Carbon metabolism;ko00630//Glyoxylate and dicarboxylate metabolism	K01637;K01637;K01637;K01637	GO:0005575//cellular_component;GO:0005622//intracellular;GO:0005623//cell;GO:0005737//cytoplasm;GO:0005777//peroxisome;GO:0009514//glyoxysome;GO:0042579//microbody;GO:0043226//organelle;GO:0043227//membrane-bounded organelle;GO:0043229//intracellular organelle;GO:0043231//intracellular membrane-bounded organelle;GO:0044424//intracellular part;GO:0044444//cytoplasmic part;GO:0044464//cell part	GO:0003674//molecular_function;GO:0003824//catalytic activity;GO:0004451//isocitrate lyase activity;GO:0005488//binding;GO:0008807//carboxyvinyl-carboxyphosphonate phosphorylmutase activity;GO:0016829//lyase activity;GO:0016830//carbon-carbon lyase activity;GO:0016833//oxo-acid-lyase activity;GO:0033978//phosphonopyruvate hydrolase activity;GO:0043167//ion binding;GO:0043169//cation binding;GO:00…	GO:0005975//carbohydrate metabolic process;GO:0006081//cellular aldehyde metabolic process;GO:0006082//organic acid metabolic process;GO:0006091//generation of precursor metabolites and energy;GO:0006097//glyoxylate cycle;GO:0006099//tricarboxylic acid cycle;GO:0006101//citrate metabolic process;GO:0008150//biological_process;GO:0008152//metabolic process;GO:0009060//aerobic respiration;GO:000998…	--
TraesCS6A03G0216800	1985	1360	54	38	113.312	102.109	3.964	4.076	107.71	4.02	-4.74382	2.1135e-81	6.83393e-77	WHAB1.6	Metabolism;Metabolism	Global and overview maps;Energy metabolism	ko01100//Metabolic pathways;ko00196//Photosynthesis - antenna proteins	K08912;K08912	-	GO:0003824//catalytic activity;GO:0046537//2,3-bisphosphoglycerate-independent phosphoglycerate mutase activity	-	--
TraesCS7B03G0698800	240	106	8439	11881	7.9	4.587	357.129	734.633	6.2435	545.881	6.45009	1.01334e-79	2.45746e-75	GABA-T	Metabolism;Metabolism;Metabolism	Global and overview maps;Amino acid metabolism;Carbohydrate metabolism	ko01100//Metabolic pathways;ko00250//Alanine, aspartate and glutamate metabolism;ko00650//Butanoate metabolism	K16871;K16871;K16871	GO:0005575//cellular_component;GO:0005622//intracellular;GO:0005623//cell;GO:0005737//cytoplasm;GO:0044424//intracellular part;GO:0044464//cell part	GO:0003674//molecular_function;GO:0003824//catalytic activity;GO:0003867//4-aminobutyrate transaminase activity;GO:0004015//adenosylmethionine-8-amino-7-oxononanoate transaminase activity;GO:0004587//ornithine-oxo-acid transaminase activity;GO:0005488//binding;GO:0008144//drug binding;GO:0008483//transaminase activity;GO:0016740//transferase activity;GO:0016769//transferase activity, transferring…	GO:0006779//porphyrin-containing compound biosynthetic process;GO:0008152//metabolic process;GO:0009058//biosynthetic process;GO:0009102//biotin biosynthetic process;GO:0009447//putrescine catabolic process;GO:0009450//gamma-aminobutyric acid catabolic process;GO:0019491//ectoine biosynthetic process	--
TraesCS5D03G1027900	2204	1689	105	67	108.741	109.602	6.663	6.212	109.171	6.4375	-4.08395	3.27489e-74	6.35356e-70	WHAB1.6	Metabolism;Metabolism	Global and overview maps;Energy metabolism	ko01100//Metabolic pathways;ko00196//Photosynthesis - antenna proteins	K08912;K08912	-	-	-	--
TraesCS2A03G0680700	259	207	4969	5192	6.846	7.19	168.743	257.608	7.018	213.175	4.92484	1.03756e-72	1.67746e-68	Os04g0338000	-	-	-	-	-	GO:0047834//D-threo-aldose 1-dehydrogenase activity	-	--
TraesCS5D03G1028000	1429	1055	52	40	101.809	98.904	4.766	5.357	100.356	5.0615	-4.30943	1.6765e-66	2.32325e-62	WHAB1.6	Metabolism;Metabolism	Global and overview maps;Energy metabolism	ko01100//Metabolic pathways;ko00196//Photosynthesis - antenna proteins	K08912;K08912	-	-	-	--
TraesCS5D03G1074900	60	34	1589	1969	2.439	1.818	83.09	150.44	2.1285	116.765	5.77763	7.12535e-61	7.82532e-57	OMT2	-	-	-	-	-	GO:0008171//O-methyltransferase activity;GO:0046983//protein dimerization activity	GO:0016051//carbohydrate biosynthetic process	--
TraesCS7B03G0270500	1747	939	42	42	86.568	61.198	2.677	3.911	73.883	3.294	-4.48733	7.26031e-61	7.82532e-57	WHAB1.6	Metabolism;Metabolism	Global and overview maps;Energy metabolism	ko01100//Metabolic pathways;ko00196//Photosynthesis - antenna proteins	K08912;K08912	-	GO:0003824//catalytic activity;GO:0046537//2,3-bisphosphoglycerate-independent phosphoglycerate mutase activity	-	--
TraesCS5D03G1072200	95	69	1748	1627	2.98	2.846	70.512	95.896	2.913	83.204	4.83608	2.13983e-60	2.07572e-56	CYP71Z18	-	-	-	-	-	GO:0005506//iron ion binding;GO:0016705//oxidoreductase activity, acting on paired donors, with incorporation or reduction of molecular oxygen;GO:0020037//heme binding	GO:0055114//oxidation-reduction process	--
TraesCS2B03G0083100	152	109	2299	1793	5.213	4.906	101.203	115.323	5.0595	108.263	4.4194	4.17748e-60	3.68393e-56	GT7	-	-	-	-	-	GO:0008194//UDP-glycosyltransferase activity	-	--
TraesCS7B03G0699000	23	8	1324	1899	0.721	0.33	53.408	111.928	0.5255	82.668	7.29749	4.96097e-60	4.01028e-56	CYP51	Metabolism;Metabolism;Metabolism	Global and overview maps;Global and overview maps;Lipid metabolism	ko01100//Metabolic pathways;ko01110//Biosynthesis of secondary metabolites;ko00100//Steroid biosynthesis	K05917;K05917;K05917	-	GO:0005506//iron ion binding;GO:0016705//oxidoreductase activity, acting on paired donors, with incorporation or reduction of molecular oxygen;GO:0020037//heme binding	GO:0055114//oxidation-reduction process	--
TraesCS5B03G1135600	1836	1833	98	45	130.81	171.828	8.982	6.006	151.319	7.494	-4.33571	6.24789e-60	4.66208e-56	WHAB1.6	Metabolism;Metabolism	Global and overview maps;Energy metabolism	ko01100//Metabolic pathways;ko00196//Photosynthesis - antenna proteins	K08912;K08912	-	-	-	--
TraesCS7B03G0270600	3293	2182	251	123	167.389	145.865	16.401	11.749	156.627	14.075	-3.47613	2.83756e-53	1.96611e-49	WHAB1.6	Metabolism;Metabolism	Global and overview maps;Energy metabolism	ko01100//Metabolic pathways;ko00196//Photosynthesis - antenna proteins	K08912;K08912	-	-	-	--
TraesCS5D03G0011800	119	62	1681	1414	3.688	2.518	66.728	82.037	3.103	74.3825	4.58323	1.51079e-51	9.77021e-48	CYP51	Metabolism;Metabolism;Metabolism	Global and overview maps;Global and overview maps;Lipid metabolism	ko01100//Metabolic pathways;ko01110//Biosynthesis of secondary metabolites;ko00100//Steroid biosynthesis	K05917;K05917;K05917	-	GO:0005506//iron ion binding;GO:0016705//oxidoreductase activity, acting on paired donors, with incorporation or reduction of molecular oxygen;GO:0020037//heme binding	GO:0055114//oxidation-reduction process	--
TraesCS1A03G0761900	3305	2530	241	97	172.463	173.64	16.173	9.511	173.052	12.842	-3.75226	5.69821e-51	3.45468e-47	CAB3C	Metabolism;Metabolism	Global and overview maps;Energy metabolism	ko01100//Metabolic pathways;ko00196//Photosynthesis - antenna proteins	K08912;K08912	-	-	-	--
TraesCS5B03G1104200	98	50	1630	2087	1.194	0.805	25.555	47.804	0.9995	36.6795	5.19762	6.77705e-50	3.86706e-46	ABCG48	-	-	-	-	GO:0005575//cellular_component;GO:0005887//integral component of plasma membrane;GO:0009380//excinuclease repair complex;GO:0009898//cytoplasmic side of plasma membrane;GO:0016020//membrane;GO:0016021//integral component of membrane;GO:0043190//ATP-binding cassette (ABC) transporter complex;GO:0055051//ATP-binding cassette (ABC) transporter complex, integrated substrate binding;GO:0055052//ATP-bi…	GO:0003674//molecular_function;GO:0003723//RNA binding;GO:0003724//RNA helicase activity;GO:0003924//GTPase activity;GO:0005319//lipid transporter activity;GO:0005524//ATP binding;GO:0005525//GTP binding;GO:0008565//protein transporter activity;GO:0009381//excinuclease ABC activity;GO:0015220//choline transmembrane transporter activity;GO:0015221//lipopolysaccharide transmembrane transporter acti…	GO:0000910//cytokinesis;GO:0002949//tRNA threonylcarbamoyladenosine modification;GO:0006289//nucleotide-excision repair;GO:0006810//transport;GO:0006817//phosphate ion transport;GO:0006824//cobalt ion transport;GO:0006869//lipid transport;GO:0007601//visual perception;GO:0008150//biological_process;GO:0008272//sulfate transport;GO:0015675//nickel cation transport;GO:0015689//molybdate ion transpo…	--
TraesCS1B03G1053200	2619	2290	178	65	128.994	148.346	11.275	6.016	138.67	8.6455	-4.00356	7.25259e-50	3.9085e-46	WHAB1.6	Metabolism;Metabolism	Global and overview maps;Energy metabolism	ko01100//Metabolic pathways;ko00196//Photosynthesis - antenna proteins	K08912;K08912	-	-	-	Table S6. RNA-seq DEGs
TraesCS1A03G0988100	4044	3011	356	159	230.151	225.392	26.072	16.992	227.772	21.532	-3.40303	6.03111e-49	3.07917e-45	WHAB1.6	Metabolism;Metabolism	Global and overview maps;Energy metabolism	ko01100//Metabolic pathways;ko00196//Photosynthesis - antenna proteins	K08912;K08912	-	GO:0003824//catalytic activity;GO:0046537//2,3-bisphosphoglycerate-independent phosphoglycerate mutase activity	-	--
TraesCS5A03G0009700	120	42	1958	1996	2.454	1.13	51.504	76.716	1.792	64.11	5.16091	3.04578e-48	1.47727e-44	Os02g0139700	Metabolism;Metabolism;Metabolism	Global and overview maps;Global and overview maps;Lipid metabolism	ko01100//Metabolic pathways;ko01110//Biosynthesis of secondary metabolites;ko00100//Steroid biosynthesis	K01853;K01853;K01853	-	GO:0003824//catalytic activity;GO:0034073//tetrahymanol cyclase activity;GO:0051007//squalene-hopene cyclase activity	GO:0016114//terpenoid biosynthetic process;GO:0019746//hopanoid biosynthetic process	--
TraesCS5D03G0992800	299	161	3479	4280	3.41	2.423	51.043	91.741	2.9165	71.392	4.61345	7.4742e-48	3.45251e-44	ABCG48	-	-	-	-	GO:0005575//cellular_component;GO:0005887//integral component of plasma membrane;GO:0009380//excinuclease repair complex;GO:0009898//cytoplasmic side of plasma membrane;GO:0016020//membrane;GO:0016021//integral component of membrane;GO:0042613//MHC class II protein complex;GO:0043190//ATP-binding cassette (ABC) transporter complex;GO:0055051//ATP-binding cassette (ABC) transporter complex, integr…	GO:0003674//molecular_function;GO:0003723//RNA binding;GO:0003724//RNA helicase activity;GO:0003924//GTPase activity;GO:0004385//guanylate kinase activity;GO:0005260//channel-conductance-controlling ATPase activity;GO:0005319//lipid transporter activity;GO:0005524//ATP binding;GO:0005525//GTP binding;GO:0008565//protein transporter activity;GO:0009381//excinuclease ABC activity;GO:0015220//cholin…	GO:0000910//cytokinesis;GO:0002949//tRNA threonylcarbamoyladenosine modification;GO:0006289//nucleotide-excision repair;GO:0006810//transport;GO:0006817//phosphate ion transport;GO:0006824//cobalt ion transport;GO:0006869//lipid transport;GO:0006955//immune response;GO:0007601//visual perception;GO:0008150//biological_process;GO:0008272//sulfate transport;GO:0015675//nickel cation transport;GO:00…	--
TraesCS2A03G1101800	31	30	863	859	0.886	1.127	31.695	46.118	1.0065	38.9065	5.27259	3.92659e-47	1.73134e-43	AS1	Metabolism;Metabolism;Metabolism;Metabolism	Global and overview maps;Global and overview maps;Amino acid metabolism;Biosynthesis of other secondary metabolites	ko01100//Metabolic pathways;ko01110//Biosynthesis of secondary metabolites;ko00350//Tyrosine metabolism;ko00950//Isoquinoline alkaloid biosynthesis	K00422;K00422;K00422;K00422	-	GO:0004097//catechol oxidase activity;GO:0016491//oxidoreductase activity	GO:0055114//oxidation-reduction process	--
TraesCS7A03G0464000	2478	1989	218	96	176.598	186.456	19.992	12.857	181.527	16.4245	-3.46626	5.39491e-47	2.27534e-43	WHAB1.6	Metabolism;Metabolism	Global and overview maps;Energy metabolism	ko01100//Metabolic pathways;ko00196//Photosynthesis - antenna proteins	K08912;K08912	-	GO:0003824//catalytic activity;GO:0046537//2,3-bisphosphoglycerate-independent phosphoglycerate mutase activity	-	--
TraesCS4A03G0226200	121	76	1696	2369	5.039	4.192	90.873	185.488	4.6155	138.18	4.90392	6.29371e-45	2.54381e-41	At3g11180	-	-	-	-	-	GO:0016491//oxidoreductase activity	GO:0055114//oxidation-reduction process	--
TraesCS5D03G1074200	49	23	913	1071	1.576	0.973	37.763	64.725	1.2745	51.244	5.32938	1.6861e-44	6.54232e-41	CYP71C4	Metabolism	Global and overview maps	ko01100//Metabolic pathways	K00512	-	GO:0005506//iron ion binding;GO:0016705//oxidoreductase activity, acting on paired donors, with incorporation or reduction of molecular oxygen;GO:0020037//heme binding	GO:0055114//oxidation-reduction process	--
TraesCS5D03G1074800	27	14	712	754	1.153	0.786	39.342	60.64	0.9695	49.991	5.68828	2.9685e-44	1.10752e-40	OMT2	-	-	-	-	-	GO:0008171//O-methyltransferase activity;GO:0046983//protein dimerization activity	GO:0016051//carbohydrate biosynthetic process	--
TraesCS5B03G1135300	678	475	19	18	31.154	28.709	1.122	1.553	29.9315	1.3375	-4.48405	3.52695e-43	1.26714e-39	WHAB1.6	Metabolism;Metabolism	Global and overview maps;Energy metabolism	ko01100//Metabolic pathways;ko00196//Photosynthesis - antenna proteins	K08912;K08912	-	-	-	--
TraesCS5D03G1027800	11527	9421	1211	493	585.418	629.294	79.099	47.051	607.356	63.075	-3.2674	1.46252e-42	5.06681e-39	WHAB1.6	Metabolism;Metabolism	Global and overview maps;Energy metabolism	ko01100//Metabolic pathways;ko00196//Photosynthesis - antenna proteins	K08912;K08912	GO:0005575//cellular_component;GO:0005622//intracellular;GO:0005623//cell;GO:0005737//cytoplasm;GO:0009507//chloroplast;GO:0009521//photosystem;GO:0009522//photosystem I;GO:0009523//photosystem II;GO:0009534//chloroplast thylakoid;GO:0009535//chloroplast thylakoid membrane;GO:0009536//plastid;GO:0009579//thylakoid;GO:0016020//membrane;GO:0016021//integral component of membrane;GO:0031224//intrins…	GO:0003674//molecular_function;GO:0005488//binding;GO:0016168//chlorophyll binding;GO:0043167//ion binding;GO:0043168//anion binding;GO:0043169//cation binding;GO:0046872//metal ion binding;GO:0046906//tetrapyrrole binding;GO:0048037//cofactor binding;GO:0097159//organic cyclic compound binding;GO:1901363//heterocyclic compound binding	GO:0006091//generation of precursor metabolites and energy;GO:0006464//cellular protein modification process;GO:0006807//nitrogen compound metabolic process;GO:0008150//biological_process;GO:0008152//metabolic process;GO:0009765//photosynthesis, light harvesting;GO:0009987//cellular process;GO:0015979//photosynthesis;GO:0018298//protein-chromophore linkage;GO:0019538//protein metabolic process;GO…	--
TraesCS1D03G0729600	3714	2477	297	109	163.194	143.194	16.777	9.001	153.194	12.889	-3.57115	1.86386e-42	6.21184e-39	CAB3C	Metabolism;Metabolism	Global and overview maps;Energy metabolism	ko01100//Metabolic pathways;ko00196//Photosynthesis - antenna proteins	K08912;K08912	GO:0005575//cellular_component;GO:0005622//intracellular;GO:0005623//cell;GO:0005737//cytoplasm;GO:0009507//chloroplast;GO:0009521//photosystem;GO:0009522//photosystem I;GO:0009523//photosystem II;GO:0009534//chloroplast thylakoid;GO:0009535//chloroplast thylakoid membrane;GO:0009536//plastid;GO:0009579//thylakoid;GO:0016020//membrane;GO:0016021//integral component of membrane;GO:0031224//intrins…	GO:0003674//molecular_function;GO:0005488//binding;GO:0016168//chlorophyll binding;GO:0043167//ion binding;GO:0043168//anion binding;GO:0043169//cation binding;GO:0046872//metal ion binding;GO:0046906//tetrapyrrole binding;GO:0048037//cofactor binding;GO:0097159//organic cyclic compound binding;GO:1901363//heterocyclic compound binding	GO:0006091//generation of precursor metabolites and energy;GO:0006464//cellular protein modification process;GO:0006807//nitrogen compound metabolic process;GO:0008150//biological_process;GO:0008152//metabolic process;GO:0009765//photosynthesis, light harvesting;GO:0009987//cellular process;GO:0015979//photosynthesis;GO:0018298//protein-chromophore linkage;GO:0019538//protein metabolic process;GO…	--
TraesCS5A03G0009400	158	77	1676	1479	5.147	3.309	70.451	90.813	4.228	80.632	4.25331	1.92111e-42	6.21184e-39	CYP51	Metabolism;Metabolism;Metabolism	Global and overview maps;Global and overview maps;Lipid metabolism	ko01100//Metabolic pathways;ko01110//Biosynthesis of secondary metabolites;ko00100//Steroid biosynthesis	K05917;K05917;K05917	-	GO:0005506//iron ion binding;GO:0016705//oxidoreductase activity, acting on paired donors, with incorporation or reduction of molecular oxygen;GO:0020037//heme binding	GO:0055114//oxidation-reduction process	--
TraesCS3D03G0754700	74	52	1189	1786	2.216	2.069	46.26	101.534	2.1425	73.897	5.10815	4.72163e-42	1.47747e-38	CYP73A2	Metabolism;Metabolism;Metabolism;Metabolism;Metabolism;Metabolism	Global and overview maps;Global and overview maps;Biosynthesis of other secondary metabolites;Metabolism of cofactors and vitamins;Biosynthesis of other secondary metabolites;Biosynthesis of other secondary metabolites	ko01100//Metabolic pathways;ko01110//Biosynthesis of secondary metabolites;ko00940//Phenylpropanoid biosynthesis;ko00130//Ubiquinone and other terpenoid-quinone biosynthesis;ko00941//Flavonoid biosynthesis;ko00945//Stilbenoid, diarylheptanoid and gingerol biosynthesis	K00487;K00487;K00487;K00487;K00487;K00487	GO:0005575//cellular_component;GO:0005618//cell wall;GO:0005622//intracellular;GO:0005623//cell;GO:0005737//cytoplasm;GO:0005773//vacuole;GO:0005774//vacuolar membrane;GO:0005783//endoplasmic reticulum;GO:0005794//Golgi apparatus;GO:0005886//plasma membrane;GO:0005911//cell-cell junction;GO:0009505//plant-type cell wall;GO:0009506//plasmodesma;GO:0012505//endomembrane system;GO:0016020//membrane;…	GO:0003674//molecular_function;GO:0003824//catalytic activity;GO:0004497//monooxygenase activity;GO:0005488//binding;GO:0005506//iron ion binding;GO:0005515//protein binding;GO:0016491//oxidoreductase activity;GO:0016705//oxidoreductase activity, acting on paired donors, with incorporation or reduction of molecular oxygen;GO:0016709//oxidoreductase activity, acting on paired donors, with incorpor…	GO:0006725//cellular aromatic compound metabolic process;GO:0006732//coenzyme metabolic process;GO:0006733//oxidoreduction coenzyme metabolic process;GO:0006743//ubiquinone metabolic process;GO:0006744//ubiquinone biosynthetic process;GO:0007275//multicellular organism development;GO:0008150//biological_process;GO:0008152//metabolic process;GO:0009058//biosynthetic process;GO:0009108//coenzyme bi…	--
TraesCS1A03G0896200LC	19054	14610	1769	646	654.055	659.605	78.081	41.669	656.83	59.875	-3.45549	7.11825e-42	2.15781e-38	CAB3C	Metabolism;Metabolism	Global and overview maps;Energy metabolism	ko01100//Metabolic pathways;ko00196//Photosynthesis - antenna proteins	K08912;K08912	-	-	-	--
TraesCS4A03G0998200	124	141	1936	1607	2.639	3.947	52.993	64.294	3.293	58.6435	4.1545	1.46892e-41	4.31792e-38	PAL	Metabolism;Metabolism;Metabolism;Metabolism	Global and overview maps;Global and overview maps;Biosynthesis of other secondary metabolites;Amino acid metabolism	ko01100//Metabolic pathways;ko01110//Biosynthesis of secondary metabolites;ko00940//Phenylpropanoid biosynthesis;ko00360//Phenylalanine metabolism	K10775;K10775;K10775;K10775	-	GO:0004397//histidine ammonia-lyase activity;GO:0016841//ammonia-lyase activity;GO:0050368//tyrosine 2,3-aminomutase activity	GO:0006548//histidine catabolic process;GO:0009058//biosynthetic process;GO:0009698//phenylpropanoid metabolic process	--
TraesCS7A03G0769100	108	76	1382	1841	4.587	4.246	75.514	146.976	4.4165	111.245	4.65469	3.93628e-41	1.12304e-37	LHT1	-	-	-	-	GO:0005887//integral component of plasma membrane	GO:0015173//aromatic amino acid transmembrane transporter activity	GO:0003333//amino acid transmembrane transport;GO:0015801//aromatic amino acid transport	--
TraesCS1B03G0871200	1859	1615	168	63	149.876	171.3	17.4	9.562	160.588	13.481	-3.57436	1.35263e-40	3.74888e-37	CAB25	Metabolism;Metabolism	Global and overview maps;Energy metabolism	ko01100//Metabolic pathways;ko00196//Photosynthesis - antenna proteins	K08912;K08912	-	GO:0003824//catalytic activity;GO:0046537//2,3-bisphosphoglycerate-independent phosphoglycerate mutase activity	-	--
TraesCS2D03G0056500	155	116	1546	1223	5.267	5.184	67.56	78.091	5.2255	72.8255	3.8008	1.69884e-40	4.57763e-37	GT7	-	-	-	-	-	GO:0008194//UDP-glycosyltransferase activity	-	--
TraesCS7B03G0394000	30	15	654	817	0.586	0.386	16.452	30.025	0.486	23.2385	5.57942	6.34531e-40	1.66357e-36	CM-LOX2	Metabolism;Metabolism;Metabolism;Metabolism	Global and overview maps;Global and overview maps;Lipid metabolism;Lipid metabolism	ko01100//Metabolic pathways;ko01110//Biosynthesis of secondary metabolites;ko00592//alpha-Linolenic acid metabolism;ko00591//Linoleic acid metabolism	K00454;K00454;K00454;K00454	-	GO:0005515//protein binding;GO:0016702//oxidoreductase activity, acting on single donors with incorporation of molecular oxygen, incorporation of two atoms of oxygen;GO:0046872//metal ion binding	GO:0055114//oxidation-reduction process	--
TraesCS2A03G0922600	22	13	639	1045	0.436	0.339	16.293	38.963	0.3875	27.628	6.15579	6.60345e-40	1.68569e-36	PAL	Metabolism;Metabolism;Metabolism;Metabolism	Global and overview maps;Global and overview maps;Biosynthesis of other secondary metabolites;Amino acid metabolism	ko01100//Metabolic pathways;ko01110//Biosynthesis of secondary metabolites;ko00940//Phenylpropanoid biosynthesis;ko00360//Phenylalanine metabolism	K10775;K10775;K10775;K10775	-	GO:0004397//histidine ammonia-lyase activity;GO:0016841//ammonia-lyase activity;GO:0050368//tyrosine 2,3-aminomutase activity	GO:0006548//histidine catabolic process;GO:0009058//biosynthetic process;GO:0009698//phenylpropanoid metabolic process	--
TraesCS6D03G0761100	1201	1038	10000	10743	17.454	19.848	186.912	293.389	18.651	240.15	3.68661	8.744e-40	2.17488e-36	LKR/SDH	Metabolism;Metabolism;Metabolism	Global and overview maps;Global and overview maps;Amino acid metabolism	ko01100//Metabolic pathways;ko01110//Biosynthesis of secondary metabolites;ko00310//Lysine degradation	K14157;K14157;K14157	-	GO:0008839//4-hydroxy-tetrahydrodipicolinate reductase;GO:0016491//oxidoreductase activity;GO:0050112//inositol 2-dehydrogenase activity;GO:0050661//NADP binding	GO:0006813//potassium ion transport;GO:0009089//lysine biosynthetic process via diaminopimelate;GO:0019310//inositol catabolic process;GO:0055114//oxidation-reduction process	--
TraesCS6B03G0994700	198	81	2161	2671	7.833	4.214	109.97	198.674	6.0235	154.322	4.6792	1.51881e-39	3.68327e-36	OPR11	Metabolism;Metabolism;Metabolism	Global and overview maps;Global and overview maps;Lipid metabolism	ko01100//Metabolic pathways;ko01110//Biosynthesis of secondary metabolites;ko00592//alpha-Linolenic acid metabolism	K05894;K05894;K05894	-	GO:0010181//FMN binding;GO:0016491//oxidoreductase activity	GO:0055114//oxidation-reduction process	--
TraesCS1A03G1033200	35	28	704	934	1.149	1.209	29.741	57.596	1.179	43.6685	5.21096	9.28738e-39	2.19735e-35	At5g44440	Metabolism;Metabolism;Metabolism	Global and overview maps;Global and overview maps;Biosynthesis of other secondary metabolites	ko01100//Metabolic pathways;ko01110//Biosynthesis of secondary metabolites;ko00940//Phenylpropanoid biosynthesis	K22395;K22395;K22395	-	GO:0008891//glycolate oxidase activity;GO:0016491//oxidoreductase activity;GO:0050660//flavin adenine dinucleotide binding	GO:0005975//carbohydrate metabolic process;GO:0055114//oxidation-reduction process	--
TraesCS2B03G0935100	88	137	2197	2683	2.631	5.388	84.507	150.743	4.0095	117.625	4.87463	1.10531e-38	2.55286e-35	MS	Metabolism;Metabolism;Metabolism;Metabolism;Metabolism	Global and overview maps;Global and overview maps;Global and overview maps;Carbohydrate metabolism;Carbohydrate metabolism	ko01100//Metabolic pathways;ko01110//Biosynthesis of secondary metabolites;ko01200//Carbon metabolism;ko00620//Pyruvate metabolism;ko00630//Glyoxylate and dicarboxylate metabolism	K01638;K01638;K01638;K01638;K01638	-	GO:0003824//catalytic activity;GO:0004474//malate synthase activity	GO:0006097//glyoxylate cycle;GO:0006099//tricarboxylic acid cycle	--
TraesCS7A03G1036000	1192	840	115	59	54.763	50.806	6.821	5.104	52.7845	5.9625	-3.14613	2.01493e-38	4.5455e-35	XTH23	-	-	-	-	GO:0005618//cell wall;GO:0048046//apoplast	GO:0004553//hydrolase activity, hydrolyzing O-glycosyl compounds;GO:0016762//xyloglucan:xyloglucosyl transferase activity	GO:0005975//carbohydrate metabolic process;GO:0006073//cellular glucan metabolic process	--
TraesCS3A03G0439600	3523	1721	250	96	72.292	46.453	6.597	3.702	59.3725	5.1495	-3.52729	2.18187e-37	4.81023e-34	TDT	-	-	-	-	GO:0005887//integral component of plasma membrane;GO:0016020//membrane;GO:0016021//integral component of membrane	GO:0008509//anion transmembrane transporter activity;GO:0022857//transmembrane transporter activity	GO:0006820//anion transport;GO:0055085//transmembrane transport	--
MSTRG.8894	14	17	545	661	0.48	0.766	24.011	42.571	0.623	33.291	5.73976	4.94231e-37	1.06539e-33	CYP99A2	Metabolism;Metabolism	Global and overview maps;Metabolism of terpenoids and polyketides	ko01110//Biosynthesis of secondary metabolites;ko00904//Diterpenoid biosynthesis	K16085;K16085	-	GO:0016491//oxidoreductase activity;GO:0046872//metal ion binding	-	--
TraesCS6B03G0758700	491	373	3413	3082	10.538	10.441	91.163	122.176	10.4895	106.669	3.34613	5.68837e-37	1.19955e-33	PAL	Metabolism;Metabolism;Metabolism;Metabolism	Global and overview maps;Global and overview maps;Biosynthesis of other secondary metabolites;Amino acid metabolism	ko01100//Metabolic pathways;ko01110//Biosynthesis of secondary metabolites;ko00940//Phenylpropanoid biosynthesis;ko00360//Phenylalanine metabolism	K13064;K13064;K13064;K13064	GO:0005575//cellular_component;GO:0005622//intracellular;GO:0005623//cell;GO:0005737//cytoplasm;GO:0044424//intracellular part;GO:0044464//cell part	GO:0003674//molecular_function;GO:0003824//catalytic activity;GO:0004397//histidine ammonia-lyase activity;GO:0016829//lyase activity;GO:0016840//carbon-nitrogen lyase activity;GO:0016841//ammonia-lyase activity;GO:0045548//phenylalanine ammonia-lyase activity;GO:0050368//tyrosine 2,3-aminomutase activity	GO:0006082//organic acid metabolic process;GO:0006520//cellular amino acid metabolic process;GO:0006548//histidine catabolic process;GO:0006558//L-phenylalanine metabolic process;GO:0006559//L-phenylalanine catabolic process;GO:0006725//cellular aromatic compound metabolic process;GO:0006807//nitrogen compound metabolic process;GO:0008150//biological_process;GO:0008152//metabolic process;GO:00090…	--
TraesCS5D03G0805800	12932	10510	1716	726	925.083	988.853	157.912	97.605	956.968	127.758	-2.90505	8.53944e-37	1.76247e-33	CAB1	Metabolism;Metabolism	Global and overview maps;Energy metabolism	ko01100//Metabolic pathways;ko00196//Photosynthesis - antenna proteins	K08912;K08912	GO:0005575//cellular_component;GO:0005622//intracellular;GO:0005623//cell;GO:0005737//cytoplasm;GO:0009507//chloroplast;GO:0009521//photosystem;GO:0009522//photosystem I;GO:0009523//photosystem II;GO:0009526//plastid envelope;GO:0009532//plastid stroma;GO:0009534//chloroplast thylakoid;GO:0009535//chloroplast thylakoid membrane;GO:0009536//plastid;GO:0009570//chloroplast stroma;GO:0009579//thylak…	GO:0003674//molecular_function;GO:0005488//binding;GO:0016168//chlorophyll binding;GO:0031409//pigment binding;GO:0043167//ion binding;GO:0043168//anion binding;GO:0043169//cation binding;GO:0046872//metal ion binding;GO:0046906//tetrapyrrole binding;GO:0048037//cofactor binding;GO:0097159//organic cyclic compound binding;GO:1901363//heterocyclic compound binding	GO:0006091//generation of precursor metabolites and energy;GO:0006464//cellular protein modification process;GO:0006807//nitrogen compound metabolic process;GO:0008150//biological_process;GO:0008152//metabolic process;GO:0009314//response to radiation;GO:0009416//response to light stimulus;GO:0009628//response to abiotic stimulus;GO:0009765//photosynthesis, light harvesting;GO:0009768//photosynth…	--
TraesCS2A03G1180200	55	47	905	1464	2.53	2.843	53.6	126.801	2.6865	90.2005	5.06934	1.6518e-36	3.33816e-33	ENDO4	-	-	-	-	-	GO:0003676//nucleic acid binding;GO:0004519//endonuclease activity	GO:0006308//DNA catabolic process	--
TraesCS1A03G0896400LC	20879	15780	2433	905	1005.77	999.772	150.73	81.915	1002.77	116.323	-3.10779	7.13457e-36	1.41241e-32	CAB3C	Metabolism;Metabolism	Global and overview maps;Energy metabolism	ko01100//Metabolic pathways;ko00196//Photosynthesis - antenna proteins	K08912;K08912	-	-	-	--
TraesCS5A03G1073100	3727	3189	416	149	159.246	179.214	22.86	11.964	169.23	17.412	-3.28083	1.1397e-35	2.21112e-32	WHAB1.6	Metabolism;Metabolism	Global and overview maps;Energy metabolism	ko01100//Metabolic pathways;ko00196//Photosynthesis - antenna proteins	K08912;K08912	-	-	-	--
TraesCS2D03G0788500	299	385	4323	4941	7.216	12.219	134.04	223.852	9.7175	178.946	4.2028	1.3266e-35	2.52325e-32	MS	Metabolism;Metabolism;Metabolism;Metabolism;Metabolism	Global and overview maps;Global and overview maps;Global and overview maps;Carbohydrate metabolism;Carbohydrate metabolism	ko01100//Metabolic pathways;ko01110//Biosynthesis of secondary metabolites;ko01200//Carbon metabolism;ko00620//Pyruvate metabolism;ko00630//Glyoxylate and dicarboxylate metabolism	K01638;K01638;K01638;K01638;K01638	GO:0005575//cellular_component;GO:0005622//intracellular;GO:0005623//cell;GO:0005737//cytoplasm;GO:0005777//peroxisome;GO:0005782//peroxisomal matrix;GO:0009514//glyoxysome;GO:0031907//microbody lumen;GO:0031974//membrane-enclosed lumen;GO:0042579//microbody;GO:0043226//organelle;GO:0043227//membrane-bounded organelle;GO:0043229//intracellular organelle;GO:0043231//intracellular membrane-bounded …	GO:0003674//molecular_function;GO:0003824//catalytic activity;GO:0004451//isocitrate lyase activity;GO:0004474//malate synthase activity;GO:0016740//transferase activity;GO:0016746//transferase activity, transferring acyl groups;GO:0016829//lyase activity;GO:0016830//carbon-carbon lyase activity;GO:0016833//oxo-acid-lyase activity;GO:0046912//transferase activity, transferring acyl groups, acyl g…	GO:0005975//carbohydrate metabolic process;GO:0006081//cellular aldehyde metabolic process;GO:0006082//organic acid metabolic process;GO:0006083//acetate metabolic process;GO:0006091//generation of precursor metabolites and energy;GO:0006097//glyoxylate cycle;GO:0006099//tricarboxylic acid cycle;GO:0006101//citrate metabolic process;GO:0006629//lipid metabolic process;GO:0006631//fatty acid metab…	--
TraesCS4D03G0019600	105	89	1243	1790	4.174	4.645	63.721	134.126	4.4095	98.9235	4.48763	6.13882e-35	1.14517e-31	NOL	Metabolism;Metabolism;Metabolism	Global and overview maps;Global and overview maps;Metabolism of cofactors and vitamins	ko01100//Metabolic pathways;ko01110//Biosynthesis of secondary metabolites;ko00860//Porphyrin metabolism	K13606;K13606;K13606	GO:0005575//cellular_component;GO:0005622//intracellular;GO:0005623//cell;GO:0005737//cytoplasm;GO:0009507//chloroplast;GO:0009534//chloroplast thylakoid;GO:0009535//chloroplast thylakoid membrane;GO:0009536//plastid;GO:0009579//thylakoid;GO:0016020//membrane;GO:0031976//plastid thylakoid;GO:0031984//organelle subcompartment;GO:0034357//photosynthetic membrane;GO:0042651//thylakoid membrane;GO:00…	GO:0003674//molecular_function;GO:0003824//catalytic activity;GO:0004316//3-oxoacyl-[acyl-carrier-protein] reductase (NADPH) activity;GO:0004757//sepiapterin reductase activity;GO:0008667//2,3-dihydro-2,3-dihydroxybenzoate dehydrogenase activity;GO:0008678//2-deoxy-D-gluconate 3-dehydrogenase activity;GO:0016491//oxidoreductase activity;GO:0016614//oxidoreductase activity, acting on CH-OH group o…	GO:0000272//polysaccharide catabolic process;GO:0006633//fatty acid biosynthetic process;GO:0006725//cellular aromatic compound metabolic process;GO:0006729//tetrahydrobiopterin biosynthetic process;GO:0006778//porphyrin-containing compound metabolic process;GO:0006787//porphyrin-containing compound catabolic process;GO:0006807//nitrogen compound metabolic process;GO:0008150//biological_process;G…	G2-like
TraesCS5B03G1146700	42	36	691	961	0.948	1.069	20.077	40.778	1.0085	30.4275	4.91509	9.49119e-35	1.73714e-31	PAL	Metabolism;Metabolism;Metabolism;Metabolism	Global and overview maps;Global and overview maps;Biosynthesis of other secondary metabolites;Amino acid metabolism	ko01100//Metabolic pathways;ko01110//Biosynthesis of secondary metabolites;ko00940//Phenylpropanoid biosynthesis;ko00360//Phenylalanine metabolism	K10775;K10775;K10775;K10775	-	GO:0004397//histidine ammonia-lyase activity;GO:0016841//ammonia-lyase activity;GO:0050368//tyrosine 2,3-aminomutase activity	GO:0006548//histidine catabolic process;GO:0009058//biosynthetic process;GO:0009698//phenylpropanoid metabolic process	--
TraesCS5D03G1073800	8	7	468	513	0.375	0.426	27.836	44.566	0.4005	36.201	6.49808	1.5638e-34	2.80916e-31	ASMT1	-	-	-	-	-	GO:0003677//DNA binding;GO:0008171//O-methyltransferase activity;GO:0046983//protein dimerization activity	GO:0006355//regulation of transcription, DNA-templated;GO:0016051//carbohydrate biosynthetic process	--
TraesCS1B03G0971700	92	32	1097	1567	1.486	0.667	22.689	47.362	1.0765	35.0255	5.02399	1.83801e-34	3.24171e-31	MIK1	-	-	-	-	-	GO:0004672//protein kinase activity;GO:0005515//protein binding;GO:0005524//ATP binding	GO:0006468//protein phosphorylation	--
TraesCS1D03G0873600	1045	546	57	17	66.128	45.438	4.637	2.002	55.783	3.3195	-4.07079	1.95959e-34	3.39443e-31	WHAB1.6	Metabolism;Metabolism	Global and overview maps;Energy metabolism	ko01100//Metabolic pathways;ko00196//Photosynthesis - antenna proteins	K08912;K08912	-	GO:0003824//catalytic activity;GO:0046537//2,3-bisphosphoglycerate-independent phosphoglycerate mutase activity	-	--
TraesCS5D03G1074400	63	17	884	1054	2.394	0.85	43.209	75.276	1.622	59.2425	5.19079	2.00647e-34	3.41467e-31	CHS2	Metabolism;Metabolism;Metabolism;Organismal Systems	Global and overview maps;Global and overview maps;Biosynthesis of other secondary metabolites;Environmental adaptation	ko01100//Metabolic pathways;ko01110//Biosynthesis of secondary metabolites;ko00941//Flavonoid biosynthesis;ko04712//Circadian rhythm - plant	K00660;K00660;K00660;K00660	GO:0016020//membrane	GO:0004315//3-oxoacyl-[acyl-carrier-protein] synthase activity;GO:0004421//hydroxymethylglutaryl-CoA synthase activity;GO:0016747//transferase activity, transferring acyl groups other than amino-acyl groups	GO:0006633//fatty acid biosynthetic process	--
TraesCS1B03G1053400	562	484	33	10	50.928	57.637	3.865	1.64	54.2825	2.7525	-4.30167	2.1879e-34	3.65922e-31	--	-	-	-	-	-	GO:0016757//transferase activity, transferring glycosyl groups	-	--
TraesCS1B03G1053300	567	460	34	11	40.567	43.288	3.109	1.528	41.9275	2.3185	-4.17663	4.23308e-34	6.95976e-31	WHAB1.6	Metabolism;Metabolism	Global and overview maps;Energy metabolism	ko01100//Metabolic pathways;ko00196//Photosynthesis - antenna proteins	K08912;K08912	-	-	-	--
TraesCS1D03G0954900	10302	7360	1173	412	408.955	384.27	59.882	30.749	396.613	45.3155	-3.12965	9.58627e-34	1.54984e-30	WHAB1.6	Metabolism;Metabolism	Global and overview maps;Energy metabolism	ko01100//Metabolic pathways;ko00196//Photosynthesis - antenna proteins	K08912;K08912	-	GO:0003824//catalytic activity;GO:0046537//2,3-bisphosphoglycerate-independent phosphoglycerate mutase activity	-	--
TraesCS4D03G0567600	26	9	511	789	0.676	0.302	16.765	37.835	0.489	27.3	5.80292	3.64795e-33	5.80108e-30	CYP90B2	Metabolism;Metabolism;Metabolism	Global and overview maps;Global and overview maps;Metabolism of terpenoids and polyketides	ko01100//Metabolic pathways;ko01110//Biosynthesis of secondary metabolites;ko00905//Brassinosteroid biosynthesis	K09587;K09587;K09587	GO:0005575//cellular_component;GO:0005622//intracellular;GO:0005623//cell;GO:0005737//cytoplasm;GO:0005783//endoplasmic reticulum;GO:0005886//plasma membrane;GO:0012505//endomembrane system;GO:0016020//membrane;GO:0016021//integral component of membrane;GO:0031224//intrinsic component of membrane;GO:0043226//organelle;GO:0043227//membrane-bounded organelle;GO:0043229//intracellular organelle;GO:0…	GO:0003674//molecular_function;GO:0003824//catalytic activity;GO:0004497//monooxygenase activity;GO:0005488//binding;GO:0005506//iron ion binding;GO:0008395//steroid hydroxylase activity;GO:0010012//steroid 22-alpha hydroxylase activity;GO:0016491//oxidoreductase activity;GO:0016705//oxidoreductase activity, acting on paired donors, with incorporation or reduction of molecular oxygen;GO:0020037//…	GO:0000902//cell morphogenesis;GO:0001101//response to acid chemical;GO:0006629//lipid metabolic process;GO:0006694//steroid biosynthetic process;GO:0007154//cell communication;GO:0007165//signal transduction;GO:0007275//multicellular organism development;GO:0008150//biological_process;GO:0008152//metabolic process;GO:0008202//steroid metabolic process;GO:0008610//lipid biosynthetic process;GO:00…	--
TraesCS5B03G1135900	9162	7628	1089	365	448.568	491.163	68.568	33.58	469.865	51.074	-3.20159	5.76329e-33	9.01713e-30	WHAB1.6	Metabolism;Metabolism	Global and overview maps;Energy metabolism	ko01100//Metabolic pathways;ko00196//Photosynthesis - antenna proteins	K08912;K08912	-	-	-	--
TraesCS3B03G1479200	71	44	763	901	2.391	1.949	33.048	57.022	2.17	45.035	4.37528	5.97993e-33	9.20758e-30	2ODD11	-	-	-	-	-	GO:0016491//oxidoreductase activity	GO:0055114//oxidation-reduction process	--
MSTRG.8892	8	9	428	589	0.267	0.395	18.354	36.896	0.331	27.625	6.383	6.25507e-33	9.40951e-30	CYP99A2	Metabolism;Metabolism	Global and overview maps;Metabolism of terpenoids and polyketides	ko01110//Biosynthesis of secondary metabolites;ko00904//Diterpenoid biosynthesis	K16085;K16085	-	GO:0016491//oxidoreductase activity;GO:0046872//metal ion binding	-	--
TraesCS2A03G0847000	123	182	2180	2516	3.69	7.16	83.967	141.619	5.425	112.793	4.37791	6.30508e-33	9.40951e-30	MS	Metabolism;Metabolism;Metabolism;Metabolism;Metabolism	Global and overview maps;Global and overview maps;Global and overview maps;Carbohydrate metabolism;Carbohydrate metabolism	ko01100//Metabolic pathways;ko01110//Biosynthesis of secondary metabolites;ko01200//Carbon metabolism;ko00620//Pyruvate metabolism;ko00630//Glyoxylate and dicarboxylate metabolism	K01638;K01638;K01638;K01638;K01638	GO:0005575//cellular_component;GO:0005622//intracellular;GO:0005623//cell;GO:0005737//cytoplasm;GO:0005777//peroxisome;GO:0005782//peroxisomal matrix;GO:0009514//glyoxysome;GO:0031907//microbody lumen;GO:0031974//membrane-enclosed lumen;GO:0042579//microbody;GO:0043226//organelle;GO:0043227//membrane-bounded organelle;GO:0043229//intracellular organelle;GO:0043231//intracellular membrane-bounded …	GO:0003674//molecular_function;GO:0003824//catalytic activity;GO:0004451//isocitrate lyase activity;GO:0004474//malate synthase activity;GO:0016740//transferase activity;GO:0016746//transferase activity, transferring acyl groups;GO:0016829//lyase activity;GO:0016830//carbon-carbon lyase activity;GO:0016833//oxo-acid-lyase activity;GO:0046912//transferase activity, transferring acyl groups, acyl g…	GO:0005975//carbohydrate metabolic process;GO:0006081//cellular aldehyde metabolic process;GO:0006082//organic acid metabolic process;GO:0006083//acetate metabolic process;GO:0006091//generation of precursor metabolites and energy;GO:0006097//glyoxylate cycle;GO:0006099//tricarboxylic acid cycle;GO:0006101//citrate metabolic process;GO:0006629//lipid metabolic process;GO:0006631//fatty acid metab…	--
TraesCS1B03G0501800	491	492	8	1	26.718	35.247	0.56	0.102	30.9825	0.331	-6.54848	1.04284e-32	1.53272e-29	--	-	-	-	-	-	GO:0003723//RNA binding;GO:0033897//ribonuclease T2 activity	-	--
TraesCS7A03G0821400	260	210	2103	2627	9.037	9.582	93.99	171.547	9.3095	132.768	3.83407	1.29878e-32	1.8804e-29	OMT1	-	-	-	-	-	GO:0003674//molecular_function;GO:0003824//catalytic activity;GO:0005488//binding;GO:0005515//protein binding;GO:0008168//methyltransferase activity;GO:0008171//O-methyltransferase activity;GO:0016740//transferase activity;GO:0016741//transferase activity, transferring one-carbon groups;GO:0046983//protein dimerization activity	GO:0000302//response to reactive oxygen species;GO:0001101//response to acid chemical;GO:0006950//response to stress;GO:0006979//response to oxidative stress;GO:0008150//biological_process;GO:0008152//metabolic process;GO:0009058//biosynthetic process;GO:0009611//response to wounding;GO:0009636//response to toxic substance;GO:0009719//response to endogenous stimulus;GO:0009723//response to ethyle…	--
TraesCS1B03G0993800	57	86	1155	1311	2.301	4.544	59.703	98.966	3.4225	79.3345	4.53483	1.36986e-32	1.95415e-29	CAJ1	-	-	-	-	GO:0016020//membrane	GO:0005515//protein binding;GO:0008863//formate dehydrogenase (NAD+) activity;GO:0009055//electron carrier activity;GO:0050136//NADH dehydrogenase (quinone) activity;GO:0051539//4 iron, 4 sulfur cluster binding;GO:0070283//radical SAM enzyme activity	GO:0006457//protein folding;GO:0009408//response to heat;GO:0043687//post-translational protein modification;GO:0045333//cellular respiration;GO:0055114//oxidation-reduction process	--
TraesCS4A03G1192300LC	21	8	459	675	0.504	0.252	14.165	30.436	0.378	22.3005	5.88255	1.48172e-32	2.08308e-29	LECRK92	-	-	-	-	-	GO:0004672//protein kinase activity;GO:0005524//ATP binding	GO:0006468//protein phosphorylation	--
TraesCS7A03G1368700	596	405	42	21	23.21	20.748	2.119	1.569	21.979	1.844	-3.57522	2.77635e-32	3.84738e-29	AN1	-	-	-	-	-	GO:0008234//cysteine-type peptidase activity	GO:0006508//proteolysis	--
TraesCS6B03G0214100	311	339	3188	3908	10.727	15.394	141.594	253.635	13.0605	197.614	3.91941	3.64713e-32	4.98291e-29	LIS	Metabolism;Metabolism	Global and overview maps;Metabolism of terpenoids and polyketides	ko01110//Biosynthesis of secondary metabolites;ko00902//Monoterpenoid biosynthesis	K15086;K15086	-	GO:0000287//magnesium ion binding;GO:0010333//terpene synthase activity;GO:0016829//lyase activity	-	--
TraesCS5B03G0999600	572	478	3635	3205	31.306	34.409	255.865	329.631	32.8575	292.748	3.15536	7.01403e-32	9.44984e-29	Cht8	Metabolism;Environmental Information Processing;Metabolism	Global and overview maps;Signal transduction;Carbohydrate metabolism	ko01100//Metabolic pathways;ko04016//MAPK signaling pathway - plant;ko00520//Amino sugar and nucleotide sugar metabolism	K20547;K20547;K20547	-	GO:0004568//chitinase activity	GO:0006032//chitin catabolic process;GO:0016998//cell wall macromolecule catabolic process	--
TraesCS5A03G0009300	283	157	1881	1530	8.578	6.263	73.377	87.204	7.4205	80.2905	3.43564	7.58526e-32	1.00795e-28	CYP51	Metabolism;Metabolism;Metabolism	Global and overview maps;Global and overview maps;Lipid metabolism	ko01100//Metabolic pathways;ko01110//Biosynthesis of secondary metabolites;ko00100//Steroid biosynthesis	K05917;K05917;K05917	-	GO:0005506//iron ion binding;GO:0016705//oxidoreductase activity, acting on paired donors, with incorporation or reduction of molecular oxygen;GO:0020037//heme binding	GO:0055114//oxidation-reduction process	--
TraesCS4D03G0764100	11388	7742	2237	1436	764.786	683.802	193.255	181.221	724.294	187.238	-1.9517	9.17299e-32	1.20246e-28	--	-	-	-	-	GO:0005576//extracellular region;GO:0009277//fungal-type cell wall	GO:0008289//lipid binding	GO:0006869//lipid transport;GO:0015891//siderophore transport;GO:0042157//lipoprotein metabolic process	--
TraesCS2D03G0862600	94	78	1012	1477	2.05	2.237	28.379	60.502	2.1435	44.4405	4.37383	1.30413e-31	1.68675e-28	PAL	Metabolism;Metabolism;Metabolism;Metabolism	Global and overview maps;Global and overview maps;Biosynthesis of other secondary metabolites;Amino acid metabolism	ko01100//Metabolic pathways;ko01110//Biosynthesis of secondary metabolites;ko00940//Phenylpropanoid biosynthesis;ko00360//Phenylalanine metabolism	K10775;K10775;K10775;K10775	-	GO:0004397//histidine ammonia-lyase activity;GO:0016841//ammonia-lyase activity;GO:0050368//tyrosine 2,3-aminomutase activity	GO:0006548//histidine catabolic process;GO:0009058//biosynthetic process;GO:0009698//phenylpropanoid metabolic process	--
TraesCS2A03G0922800	52	17	676	1065	1.132	0.487	18.913	43.545	0.8095	31.229	5.26971	2.63617e-31	3.36472e-28	PAL	Metabolism;Metabolism;Metabolism;Metabolism	Global and overview maps;Global and overview maps;Biosynthesis of other secondary metabolites;Amino acid metabolism	ko01100//Metabolic pathways;ko01110//Biosynthesis of secondary metabolites;ko00940//Phenylpropanoid biosynthesis;ko00360//Phenylalanine metabolism	K10775;K10775;K10775;K10775	GO:0005575//cellular_component;GO:0005622//intracellular;GO:0005623//cell;GO:0005737//cytoplasm;GO:0044424//intracellular part;GO:0044464//cell part	GO:0003674//molecular_function;GO:0003824//catalytic activity;GO:0004397//histidine ammonia-lyase activity;GO:0016829//lyase activity;GO:0016840//carbon-nitrogen lyase activity;GO:0016841//ammonia-lyase activity;GO:0045548//phenylalanine ammonia-lyase activity;GO:0050368//tyrosine 2,3-aminomutase activity	GO:0006082//organic acid metabolic process;GO:0006520//cellular amino acid metabolic process;GO:0006548//histidine catabolic process;GO:0006558//L-phenylalanine metabolic process;GO:0006559//L-phenylalanine catabolic process;GO:0006725//cellular aromatic compound metabolic process;GO:0006807//nitrogen compound metabolic process;GO:0008150//biological_process;GO:0008152//metabolic process;GO:00090…	--
TraesCS2B03G1014000	21	14	437	668	0.404	0.354	10.828	24.153	0.379	17.4905	5.52823	2.9102e-31	3.66624e-28	PAL	Metabolism;Metabolism;Metabolism;Metabolism	Global and overview maps;Global and overview maps;Biosynthesis of other secondary metabolites;Amino acid metabolism	ko01100//Metabolic pathways;ko01110//Biosynthesis of secondary metabolites;ko00940//Phenylpropanoid biosynthesis;ko00360//Phenylalanine metabolism	K10775;K10775;K10775;K10775	-	GO:0004397//histidine ammonia-lyase activity;GO:0016841//ammonia-lyase activity;GO:0050368//tyrosine 2,3-aminomutase activity	GO:0006548//histidine catabolic process;GO:0009058//biosynthetic process;GO:0009698//phenylpropanoid metabolic process	--
TraesCS2B03G1133200	25	30	537	549	0.82	1.294	22.658	33.846	1.057	28.252	4.74031	3.06583e-31	3.8128e-28	CYP701A6	Metabolism;Metabolism;Metabolism	Global and overview maps;Global and overview maps;Metabolism of terpenoids and polyketides	ko01100//Metabolic pathways;ko01110//Biosynthesis of secondary metabolites;ko00904//Diterpenoid biosynthesis	K04122;K04122;K04122	-	GO:0005506//iron ion binding;GO:0016705//oxidoreductase activity, acting on paired donors, with incorporation or reduction of molecular oxygen;GO:0020037//heme binding	GO:0055114//oxidation-reduction process	--
TraesCS5B03G0884400	38003	33117	6378	2719	1773.8	2033.08	382.845	238.465	1903.44	310.655	-2.61522	4.11549e-31	5.0534e-28	CAB1	Metabolism;Metabolism	Global and overview maps;Energy metabolism	ko01100//Metabolic pathways;ko00196//Photosynthesis - antenna proteins	K08912;K08912	-	-	-	--
TraesCS2B03G1050500	234	176	1716	2046	10.203	10.1	96.265	167.698	10.1515	131.982	3.70057	6.29879e-31	7.6376e-28	F3H-2	-	-	-	-	-	GO:0016491//oxidoreductase activity	GO:0055114//oxidation-reduction process	--
TraesCS7D03G0736900	319	222	2044	2185	13.579	12.429	111.893	174.825	13.004	143.359	3.46261	7.08572e-31	8.48572e-28	LHT1	-	-	-	-	GO:0005887//integral component of plasma membrane	GO:0015173//aromatic amino acid transmembrane transporter activity	GO:0003333//amino acid transmembrane transport;GO:0015801//aromatic amino acid transport	--
TraesCS6B03G0922700	92	53	807	778	1.962	1.484	22.054	31.039	1.723	26.5465	3.94553	9.13301e-31	1.07541e-27	HAK16	-	-	-	-	GO:0005575//cellular_component;GO:0016020//membrane;GO:0016021//integral component of membrane;GO:0031224//intrinsic component of membrane;GO:0044425//membrane part	GO:0003674//molecular_function;GO:0005215//transporter activity;GO:0008324//cation transmembrane transporter activity;GO:0015075//ion transmembrane transporter activity;GO:0015077//monovalent inorganic cation transmembrane transporter activity;GO:0015079//potassium ion transmembrane transporter activity;GO:0015318//inorganic solute uptake transmembrane transporter activity;GO:0022857//transmembra…	GO:0006810//transport;GO:0006811//ion transport;GO:0006812//cation transport;GO:0006813//potassium ion transport;GO:0008150//biological_process;GO:0009987//cellular process;GO:0015672//monovalent inorganic cation transport;GO:0030001//metal ion transport;GO:0034220//ion transmembrane transport;GO:0051179//localization;GO:0051234//establishment of localization;GO:0055085//transmembrane transport;G…	--
TraesCS5A03G0843800	12859	10798	1966	767	919.875	1015.96	180.904	103.059	967.918	141.982	-2.76918	9.20161e-31	1.07541e-27	CAB1	Metabolism;Metabolism	Global and overview maps;Energy metabolism	ko01100//Metabolic pathways;ko00196//Photosynthesis - antenna proteins	K08912;K08912	GO:0005575//cellular_component;GO:0005622//intracellular;GO:0005623//cell;GO:0005737//cytoplasm;GO:0009507//chloroplast;GO:0009521//photosystem;GO:0009522//photosystem I;GO:0009523//photosystem II;GO:0009526//plastid envelope;GO:0009532//plastid stroma;GO:0009534//chloroplast thylakoid;GO:0009535//chloroplast thylakoid membrane;GO:0009536//plastid;GO:0009570//chloroplast stroma;GO:0009579//thylak…	GO:0003674//molecular_function;GO:0005488//binding;GO:0016168//chlorophyll binding;GO:0031409//pigment binding;GO:0043167//ion binding;GO:0043168//anion binding;GO:0043169//cation binding;GO:0046872//metal ion binding;GO:0046906//tetrapyrrole binding;GO:0048037//cofactor binding;GO:0097159//organic cyclic compound binding;GO:1901363//heterocyclic compound binding	GO:0006091//generation of precursor metabolites and energy;GO:0006464//cellular protein modification process;GO:0006807//nitrogen compound metabolic process;GO:0008150//biological_process;GO:0008152//metabolic process;GO:0009314//response to radiation;GO:0009416//response to light stimulus;GO:0009628//response to abiotic stimulus;GO:0009765//photosynthesis, light harvesting;GO:0009768//photosynth…	--
TraesCS7A03G0987800	28	27	510	732	0.941	1.193	22.038	46.217	1.067	34.1275	4.9993	1.34594e-30	1.5543e-27	HSR201	-	-	-	-	-	GO:0016747//transferase activity, transferring acyl groups other than amino-acyl groups	-	--
TraesCS6D03G0707800	56	36	616	757	2.179	1.842	30.805	55.326	2.0105	43.0655	4.42091	3.06295e-30	3.49551e-27	OPR11	Metabolism;Metabolism;Metabolism	Global and overview maps;Global and overview maps;Lipid metabolism	ko01100//Metabolic pathways;ko01110//Biosynthesis of secondary metabolites;ko00592//alpha-Linolenic acid metabolism	K05894;K05894;K05894	-	GO:0010181//FMN binding;GO:0016491//oxidoreductase activity	GO:0055114//oxidation-reduction process	--
TraesCS4B03G0940000	756	547	79	36	52.693	50.145	7.082	4.715	51.419	5.8985	-3.12388	3.14312e-30	3.5453e-27	APS1	-	-	-	-	-	-	-	--
TraesCS3B03G1366400	67	46	684	823	1.816	1.632	23.72	41.737	1.724	32.7285	4.24672	3.44332e-30	3.83927e-27	DOX1	Metabolism	Lipid metabolism	ko00592//alpha-Linolenic acid metabolism	K10529	-	-	-	--
TraesCS3D03G0648000	4602	3261	722	315	241.255	224.855	48.656	31.058	233.055	39.857	-2.54777	5.58023e-30	6.15119e-27	PXG4	Metabolism	Lipid metabolism	ko00073//Cutin, suberine and wax biosynthesis	K17991	-	GO:0005509//calcium ion binding	-	--
TraesCS2A03G0950700	454	309	2693	3029	16.809	15.065	128.205	210.701	15.937	169.453	3.41043	1.16452e-29	1.26925e-26	F3H-2	-	-	-	-	-	GO:0016491//oxidoreductase activity	GO:0055114//oxidation-reduction process	--
TraesCS2D03G0229000	184	102	2098	984	8.363	6.097	122.633	84.041	7.23	103.337	3.83722	1.25189e-29	1.34932e-26	PRX112	Metabolism;Metabolism;Metabolism	Global and overview maps;Global and overview maps;Biosynthesis of other secondary metabolites	ko01100//Metabolic pathways;ko01110//Biosynthesis of secondary metabolites;ko00940//Phenylpropanoid biosynthesis	K00430;K00430;K00430	-	GO:0004601//peroxidase activity;GO:0020037//heme binding	GO:0006979//response to oxidative stress;GO:0055114//oxidation-reduction process	--
TraesCS4D03G0482900	126	82	1019	1336	5.188	4.415	53.965	103.378	4.8015	78.6715	4.03428	1.43749e-29	1.53233e-26	At3g11180	-	-	-	-	-	GO:0016491//oxidoreductase activity	GO:0055114//oxidation-reduction process	--
TraesCS1B03G1170500	3341	2834	481	176	238.114	265.644	44.077	23.56	251.879	33.8185	-2.89685	1.60171e-29	1.68882e-26	WHAB1.6	Metabolism;Metabolism	Global and overview maps;Energy metabolism	ko01100//Metabolic pathways;ko00196//Photosynthesis - antenna proteins	K08912;K08912	GO:0005575//cellular_component;GO:0005622//intracellular;GO:0005623//cell;GO:0005737//cytoplasm;GO:0009507//chloroplast;GO:0009521//photosystem;GO:0009522//photosystem I;GO:0009523//photosystem II;GO:0009534//chloroplast thylakoid;GO:0009535//chloroplast thylakoid membrane;GO:0009536//plastid;GO:0009579//thylakoid;GO:0016020//membrane;GO:0016021//integral component of membrane;GO:0031224//intrins…	GO:0003674//molecular_function;GO:0003824//catalytic activity;GO:0005488//binding;GO:0016168//chlorophyll binding;GO:0043167//ion binding;GO:0043168//anion binding;GO:0043169//cation binding;GO:0046537//2,3-bisphosphoglycerate-independent phosphoglycerate mutase activity;GO:0046872//metal ion binding;GO:0046906//tetrapyrrole binding;GO:0048037//cofactor binding;GO:0097159//organic cyclic compound…	GO:0006091//generation of precursor metabolites and energy;GO:0006464//cellular protein modification process;GO:0006807//nitrogen compound metabolic process;GO:0008150//biological_process;GO:0008152//metabolic process;GO:0009765//photosynthesis, light harvesting;GO:0009987//cellular process;GO:0015979//photosynthesis;GO:0018298//protein-chromophore linkage;GO:0019538//protein metabolic process;GO…	--
TraesCS2D03G0893500	401	276	2357	2507	15.873	14.345	119.994	186.487	15.109	153.24	3.34232	1.71248e-29	1.78621e-26	F3H-2	-	-	-	-	-	GO:0016491//oxidoreductase activity	GO:0055114//oxidation-reduction process	--
TraesCS7D03G1290300	184	107	1429	931	10.773	8.24	107.602	102.431	9.5065	105.016	3.46556	1.90682e-29	1.96776e-26	RASTL-1	-	-	-	-	-	GO:0008233//peptidase activity	GO:0006508//proteolysis;GO:0006950//response to stress;GO:0006952//defense response;GO:0008150//biological_process;GO:0009607//response to biotic stimulus;GO:0016032//viral process;GO:0050896//response to stimulus	--
TraesCS3B03G0942000	21	14	408	715	0.6	0.527	14.789	37.913	0.5635	26.351	5.5473	1.99338e-29	2.03543e-26	CYP73A4	Metabolism;Metabolism;Metabolism;Metabolism;Metabolism;Metabolism	Global and overview maps;Global and overview maps;Biosynthesis of other secondary metabolites;Metabolism of cofactors and vitamins;Biosynthesis of other secondary metabolites;Biosynthesis of other secondary metabolites	ko01100//Metabolic pathways;ko01110//Biosynthesis of secondary metabolites;ko00940//Phenylpropanoid biosynthesis;ko00130//Ubiquinone and other terpenoid-quinone biosynthesis;ko00941//Flavonoid biosynthesis;ko00945//Stilbenoid, diarylheptanoid and gingerol biosynthesis	K00487;K00487;K00487;K00487;K00487;K00487	GO:0005575//cellular_component;GO:0005618//cell wall;GO:0005622//intracellular;GO:0005623//cell;GO:0005737//cytoplasm;GO:0005773//vacuole;GO:0005774//vacuolar membrane;GO:0005783//endoplasmic reticulum;GO:0005794//Golgi apparatus;GO:0005886//plasma membrane;GO:0005911//cell-cell junction;GO:0009505//plant-type cell wall;GO:0009506//plasmodesma;GO:0012505//endomembrane system;GO:0016020//membrane;…	GO:0003674//molecular_function;GO:0003824//catalytic activity;GO:0004497//monooxygenase activity;GO:0005488//binding;GO:0005506//iron ion binding;GO:0005515//protein binding;GO:0016491//oxidoreductase activity;GO:0016705//oxidoreductase activity, acting on paired donors, with incorporation or reduction of molecular oxygen;GO:0016709//oxidoreductase activity, acting on paired donors, with incorpor…	GO:0006725//cellular aromatic compound metabolic process;GO:0006732//coenzyme metabolic process;GO:0006733//oxidoreduction coenzyme metabolic process;GO:0006743//ubiquinone metabolic process;GO:0006744//ubiquinone biosynthetic process;GO:0007275//multicellular organism development;GO:0008150//biological_process;GO:0008152//metabolic process;GO:0009058//biosynthetic process;GO:0009108//coenzyme bi…	--
TraesCS7D03G1237600	15	14	381	464	0.836	1.063	30.848	52.544	0.9495	41.696	5.4566	3.16366e-29	3.19675e-26	ACA5	Metabolism;Metabolism	Global and overview maps;Energy metabolism	ko01100//Metabolic pathways;ko00910//Nitrogen metabolism	K01674;K01674	-	-	-	--
TraesCS6A03G0215300	693	429	53	17	24.37	19.846	2.396	1.123	22.108	1.7595	-3.65133	6.18986e-29	6.19012e-26	WHAB1.6	Metabolism;Metabolism	Global and overview maps;Energy metabolism	ko01100//Metabolic pathways;ko00196//Photosynthesis - antenna proteins	K08912;K08912	-	GO:0003824//catalytic activity;GO:0046537//2,3-bisphosphoglycerate-independent phosphoglycerate mutase activity	-	--
TraesCS3A03G0131600	102	63	858	1160	3.256	2.645	35.23	69.594	2.9505	52.412	4.15087	7.55801e-29	7.4812e-26	CYP71C4	Metabolism	Global and overview maps	ko01100//Metabolic pathways	K00512	-	GO:0005506//iron ion binding;GO:0016705//oxidoreductase activity, acting on paired donors, with incorporation or reduction of molecular oxygen;GO:0020037//heme binding	GO:0055114//oxidation-reduction process	--
TraesCS1B03G1105500	98	84	864	850	2.174	2.451	24.653	35.438	2.3125	30.0455	3.69962	1.06424e-28	1.04278e-25	Os07g0190000	Metabolism;Metabolism;Metabolism;Metabolism	Global and overview maps;Global and overview maps;Metabolism of terpenoids and polyketides;Metabolism of cofactors and vitamins	ko01100//Metabolic pathways;ko01110//Biosynthesis of secondary metabolites;ko00900//Terpenoid backbone biosynthesis;ko00730//Thiamine metabolism	K01662;K01662;K01662;K01662	GO:0005737//cytoplasm;GO:0045250//cytosolic pyruvate dehydrogenase complex	GO:0003824//catalytic activity;GO:0004739//pyruvate dehydrogenase (acetyl-transferring) activity;GO:0004802//transketolase activity;GO:0008661//1-deoxy-D-xylulose-5-phosphate synthase activity;GO:0016624//oxidoreductase activity, acting on the aldehyde or oxo group of donors, disulfide as acceptor;GO:0030976//thiamine pyrophosphate binding	GO:0006086//acetyl-CoA biosynthetic process from pyruvate;GO:0006098//pentose-phosphate shunt;GO:0008615//pyridoxine biosynthetic process;GO:0009228//thiamine biosynthetic process;GO:0009240//isopentenyl diphosphate biosynthetic process;GO:0016114//terpenoid biosynthetic process	--
TraesCS1A03G0858000	64	108	1252	1539	2.713	6.032	68.126	122.369	4.3725	95.2475	4.44515	2.3113e-28	2.24205e-25	CAJ1	-	-	-	-	GO:0016020//membrane	GO:0005515//protein binding;GO:0008863//formate dehydrogenase (NAD+) activity;GO:0009055//electron carrier activity;GO:0050136//NADH dehydrogenase (quinone) activity;GO:0051539//4 iron, 4 sulfur cluster binding	GO:0006457//protein folding;GO:0009408//response to heat;GO:0015948//methanogenesis;GO:0045333//cellular respiration;GO:0055114//oxidation-reduction process	--
TraesCS5D03G0905700	141	86	1071	1532	5.98	4.797	58.417	122.095	5.3885	90.256	4.06607	3.75813e-28	3.60944e-25	Cht8	Metabolism;Environmental Information Processing;Metabolism	Global and overview maps;Signal transduction;Carbohydrate metabolism	ko01100//Metabolic pathways;ko04016//MAPK signaling pathway - plant;ko00520//Amino sugar and nucleotide sugar metabolism	K20547;K20547;K20547	-	GO:0004568//chitinase activity	GO:0006032//chitin catabolic process;GO:0016998//cell wall macromolecule catabolic process	--
TraesCS5A03G1181200	11250	6599	2101	1349	852.861	658.018	204.797	192.183	755.439	198.49	-1.92825	4.28146e-28	4.07175e-25	--	-	-	-	-	GO:0005576//extracellular region	GO:0008289//lipid binding	GO:0006869//lipid transport;GO:0042157//lipoprotein metabolic process	--
TraesCS2A03G1014400	1349	1259	232	179	42.358	51.994	9.369	10.562	47.176	9.9655	-2.24304	4.35242e-28	4.09905e-25	TPRP-F1	-	-	-	-	-	-	-	--
TraesCS5D03G0632600	397	244	9	6	18.029	14.574	0.526	0.512	16.3015	0.519	-4.97313	4.69387e-28	4.37812e-25	CCR1	-	-	-	-	-	GO:0003824//catalytic activity;GO:0003854//3-beta-hydroxy-delta5-steroid dehydrogenase activity;GO:0003978//UDP-glucose 4-epimerase activity;GO:0004043//L-aminoadipate-semialdehyde dehydrogenase activity;GO:0008446//GDP-mannose 4,6-dehydratase activity;GO:0016616//oxidoreductase activity, acting on the CH-OH group of donors, NAD or NADP as acceptor;GO:0016655//oxidoreductase activity, acting on N…	GO:0000271//polysaccharide biosynthetic process;GO:0005975//carbohydrate metabolic process;GO:0006012//galactose metabolic process;GO:0006694//steroid biosynthetic process;GO:0008152//metabolic process;GO:0009243//O antigen biosynthetic process;GO:0019878//lysine biosynthetic process via aminoadipic acid;GO:0055114//oxidation-reduction process	--
MSTRG.6326	228	122	1489	1901	21.475	15.086	181.752	339.295	18.2805	260.524	3.83304	4.89763e-28	4.52466e-25	--	-	-	-	-	-	-	-	--
TraesCS2A03G0055800	13	14	376	347	0.414	0.587	15.404	20.772	0.5005	18.088	5.17552	5.83676e-28	5.3414e-25	CYP99A3	Metabolism;Metabolism	Global and overview maps;Metabolism of terpenoids and polyketides	ko01110//Biosynthesis of secondary metabolites;ko00904//Diterpenoid biosynthesis	K16085;K16085	-	GO:0005506//iron ion binding;GO:0016705//oxidoreductase activity, acting on paired donors, with incorporation or reduction of molecular oxygen;GO:0020037//heme binding	GO:0055114//oxidation-reduction process	--
TraesCS1B03G0989500	40	14	486	595	1.199	0.552	18.73	33.505	0.8755	26.1175	4.89877	6.23948e-28	5.65658e-25	CYP72A15	-	-	-	-	-	GO:0005506//iron ion binding;GO:0016705//oxidoreductase activity, acting on paired donors, with incorporation or reduction of molecular oxygen;GO:0020037//heme binding	GO:0055114//oxidation-reduction process	--
TraesCS2A03G0430200LC	3100	3880	518	211	233.116	383.831	50.131	29.834	308.474	39.9825	-2.94771	1.08295e-27	9.72692e-25	--	-	-	-	-	-	-	-	--
TraesCS6B03G0919500	702	413	50	13	29.014	22.46	2.671	1.028	25.737	1.8495	-3.79864	1.27213e-27	1.13213e-24	CURT1A	-	-	-	-	-	-	-	--
TraesCS5B03G0758200	110	92	925	1164	4.054	4.459	43.937	80.804	4.2565	62.3705	3.87312	1.56932e-27	1.3822e-24	BGLU31	Metabolism;Metabolism;Metabolism;Metabolism;Metabolism	Global and overview maps;Global and overview maps;Biosynthesis of other secondary metabolites;Carbohydrate metabolism;Metabolism of other amino acids	ko01100//Metabolic pathways;ko01110//Biosynthesis of secondary metabolites;ko00940//Phenylpropanoid biosynthesis;ko00500//Starch and sucrose metabolism;ko00460//Cyanoamino acid metabolism	K01188;K01188;K01188;K01188;K01188	GO:0009341//beta-galactosidase complex	GO:0004553//hydrolase activity, hydrolyzing O-glycosyl compounds;GO:0004565//beta-galactosidase activity	GO:0005975//carbohydrate metabolic process;GO:0006012//galactose metabolic process	--
TraesCS4B03G0883300	43	46	588	793	1.3	1.829	22.865	45.056	1.5645	33.9605	4.44008	1.58163e-27	1.3822e-24	At1g19450	-	-	-	-	GO:0005887//integral component of plasma membrane;GO:0016021//integral component of membrane	GO:0008028//monocarboxylic acid transmembrane transporter activity;GO:0015295//solute:proton symporter activity;GO:0022857//transmembrane transporter activity;GO:0042910//xenobiotic transporter activity;GO:0051119//sugar transmembrane transporter activity	GO:0006810//transport;GO:0008643//carbohydrate transport;GO:0015718//monocarboxylic acid transport;GO:0042908//xenobiotic transport;GO:0055085//transmembrane transport	--
TraesCS5D03G0012000	21	10	367	393	0.88	0.539	19.304	30.242	0.7095	24.773	5.12582	2.00565e-27	1.73711e-24	3BETAHSD/D1	Metabolism;Metabolism;Metabolism	Global and overview maps;Global and overview maps;Lipid metabolism	ko01100//Metabolic pathways;ko01110//Biosynthesis of secondary metabolites;ko00100//Steroid biosynthesis	K23558;K23558;K23558	-	GO:0003824//catalytic activity;GO:0003854//3-beta-hydroxy-delta5-steroid dehydrogenase activity;GO:0003978//UDP-glucose 4-epimerase activity;GO:0004043//L-aminoadipate-semialdehyde dehydrogenase activity;GO:0008460//dTDP-glucose 4,6-dehydratase activity;GO:0008712//ADP-glyceromanno-heptose 6-epimerase activity;GO:0008831//dTDP-4-dehydrorhamnose reductase activity;GO:0016616//oxidoreductase activi…	GO:0005975//carbohydrate metabolic process;GO:0006012//galactose metabolic process;GO:0006694//steroid biosynthetic process;GO:0009243//O antigen biosynthetic process;GO:0009244//lipopolysaccharide core region biosynthetic process;GO:0019305//dTDP-rhamnose biosynthetic process;GO:0019878//lysine biosynthetic process via aminoadipic acid;GO:0055114//oxidation-reduction process	--
TraesCS2A03G0056900	214	161	1443	1026	6.738	6.667	58.433	60.706	6.7025	59.5695	3.1518	2.78135e-27	2.38763e-24	UGT85A24	-	-	-	-	-	GO:0008194//UDP-glycosyltransferase activity	-	--
TraesCS7D03G1251300	8402	6331	1249	429	409.583	405.918	78.306	39.299	407.75	58.8025	-2.79374	2.8212e-27	2.40059e-24	STR15	-	-	-	-	-	-	GO:0001887//selenium compound metabolic process;GO:0006400//tRNA modification	--
TraesCS4A03G0227300	17	5	477	271	0.451	0.174	16.268	13.502	0.3125	14.885	5.57386	3.08325e-27	2.60076e-24	Os03g0291500	Metabolism;Metabolism;Metabolism;Metabolism	Global and overview maps;Global and overview maps;Global and overview maps;Amino acid metabolism	ko01100//Metabolic pathways;ko01110//Biosynthesis of secondary metabolites;ko01230//Biosynthesis of amino acids;ko00250//Alanine, aspartate and glutamate metabolism	K01953;K01953;K01953;K01953	GO:0005737//cytoplasm	GO:0000166//nucleotide binding;GO:0003674//molecular_function;GO:0003824//catalytic activity;GO:0004044//amidophosphoribosyltransferase activity;GO:0004066//asparagine synthase (glutamine-hydrolyzing) activity;GO:0004360//glutamine-fructose-6-phosphate transaminase (isomerizing) activity;GO:0005488//binding;GO:0005515//protein binding;GO:0005524//ATP binding;GO:0008144//drug binding;GO:0008795//N…	GO:0006040//amino sugar metabolic process;GO:0006082//organic acid metabolic process;GO:0006520//cellular amino acid metabolic process;GO:0006528//asparagine metabolic process;GO:0006529//asparagine biosynthetic process;GO:0006541//glutamine metabolic process;GO:0006807//nitrogen compound metabolic process;GO:0008150//biological_process;GO:0008152//metabolic process;GO:0008652//cellular amino aci…	--
TraesCS4B03G0703600	17	9	338	626	0.578	0.414	14.984	40.553	0.496	27.7685	5.80697	3.26986e-27	2.73439e-24	ALD1	Metabolism;Metabolism;Metabolism;Metabolism	Global and overview maps;Global and overview maps;Global and overview maps;Amino acid metabolism	ko01100//Metabolic pathways;ko01110//Biosynthesis of secondary metabolites;ko01230//Biosynthesis of amino acids;ko00300//Lysine biosynthesis	K10206;K10206;K10206;K10206	GO:0005737//cytoplasm	GO:0003824//catalytic activity;GO:0004400//histidinol-phosphate transaminase activity;GO:0004838//L-tyrosine:2-oxoglutarate aminotransferase activity;GO:0009016//succinyldiaminopimelate transaminase activity;GO:0016846//carbon-sulfur lyase activity;GO:0030170//pyridoxal phosphate binding;GO:0047688//aspartate 4-decarboxylase activity;GO:0048472//threonine-phosphate decarboxylase activity	GO:0000105//histidine biosynthetic process;GO:0006531//aspartate metabolic process;GO:0006559//L-phenylalanine catabolic process;GO:0006572//tyrosine catabolic process;GO:0009058//biosynthetic process;GO:0009236//cobalamin biosynthetic process;GO:0019877//diaminopimelate biosynthetic process;GO:0042398//cellular modified amino acid biosynthetic process	--
MSTRG.8891	18	24	417	483	0.537	0.962	16.405	27.803	0.7495	22.104	4.88224	3.63536e-27	3.01405e-24	CYP99A2	Metabolism;Metabolism	Global and overview maps;Metabolism of terpenoids and polyketides	ko01110//Biosynthesis of secondary metabolites;ko00904//Diterpenoid biosynthesis	K16085;K16085	-	GO:0016491//oxidoreductase activity;GO:0046872//metal ion binding	-	--
TraesCS5D03G1059300	278	269	1976	2045	3.089	3.938	28.294	42.783	3.5135	35.5385	3.3384	7.67281e-27	6.30757e-24	ABCC4	Environmental Information Processing	Membrane transport	ko02010//ABC transporters	K05665	GO:0005575//cellular_component;GO:0005737//cytoplasm;GO:0005887//integral component of plasma membrane;GO:0009380//excinuclease repair complex;GO:0009898//cytoplasmic side of plasma membrane;GO:0016021//integral component of membrane;GO:0043190//ATP-binding cassette (ABC) transporter complex;GO:0055051//ATP-binding cassette (ABC) transporter complex, integrated substrate binding;GO:0055052//ATP-b…	GO:0000166//nucleotide binding;GO:0003677//DNA binding;GO:0003924//GTPase activity;GO:0005260//channel-conductance-controlling ATPase activity;GO:0005319//lipid transporter activity;GO:0005524//ATP binding;GO:0005525//GTP binding;GO:0008565//protein transporter activity;GO:0009381//excinuclease ABC activity;GO:0015220//choline transmembrane transporter activity;GO:0015221//lipopolysaccharide tran…	GO:0000910//cytokinesis;GO:0006289//nucleotide-excision repair;GO:0006810//transport;GO:0006817//phosphate ion transport;GO:0006824//cobalt ion transport;GO:0006855//drug transmembrane transport;GO:0006869//lipid transport;GO:0007601//visual perception;GO:0008150//biological_process;GO:0008272//sulfate transport;GO:0015675//nickel cation transport;GO:0015689//molybdate ion transport;GO:0015706//n…	--
TraesCS1B03G0849800	56	65	740	1181	1.745	2.67	29.811	69.552	2.2075	49.6815	4.49222	8.39233e-27	6.84109e-24	At3g08860	Metabolism;Metabolism;Metabolism;Metabolism;Metabolism;Metabolism	Global and overview maps;Global and overview maps;Amino acid metabolism;Amino acid metabolism;Amino acid metabolism;Amino acid metabolism	ko01100//Metabolic pathways;ko01110//Biosynthesis of secondary metabolites;ko00270//Cysteine and methionine metabolism;ko00260//Glycine, serine and threonine metabolism;ko00250//Alanine, aspartate and glutamate metabolism;ko00280//Valine, leucine and isoleucine degradation	K00827;K00827;K00827;K00827;K00827;K00827	GO:0005737//cytoplasm	GO:0003867//4-aminobutyrate transaminase activity;GO:0004015//adenosylmethionine-8-amino-7-oxononanoate transaminase activity;GO:0004587//ornithine-oxo-acid transaminase activity;GO:0008483//transaminase activity;GO:0030170//pyridoxal phosphate binding;GO:0033094//butane-1,4-diamine:2-oxoglutarate aminotransferase activity;GO:0042286//glutamate-1-semialdehyde 2,1-aminomutase activity;GO:0045303//…	GO:0006779//porphyrin-containing compound biosynthetic process;GO:0008152//metabolic process;GO:0009102//biotin biosynthetic process;GO:0009447//putrescine catabolic process;GO:0009450//gamma-aminobutyric acid catabolic process;GO:0019491//ectoine biosynthetic process	--
TraesCS6B03G1170500	54	21	575	454	1.629	0.853	22.413	25.877	1.241	24.145	4.28215	1.48124e-26	1.19739e-23	CYP72A15	-	-	-	-	-	GO:0005506//iron ion binding;GO:0016705//oxidoreductase activity, acting on paired donors, with incorporation or reduction of molecular oxygen;GO:0020037//heme binding	GO:0055114//oxidation-reduction process	--
TraesCSU03G0360100LC	24	19	380	656	1.394	1.428	27.934	70.393	1.411	49.1635	5.1228	2.5306e-26	2.01413e-23	LIS	Metabolism;Metabolism	Global and overview maps;Metabolism of terpenoids and polyketides	ko01110//Biosynthesis of secondary metabolites;ko00902//Monoterpenoid biosynthesis	K15086;K15086	-	GO:0000287//magnesium ion binding;GO:0010333//terpene synthase activity;GO:0016829//lyase activity	-	--
TraesCS5A03G0720100	447	345	2504	2842	12.913	13.109	93.016	154.265	13.011	123.641	3.24835	2.53313e-26	2.01413e-23	BGLU31	Metabolism;Metabolism;Metabolism;Metabolism;Metabolism	Global and overview maps;Global and overview maps;Biosynthesis of other secondary metabolites;Carbohydrate metabolism;Metabolism of other amino acids	ko01100//Metabolic pathways;ko01110//Biosynthesis of secondary metabolites;ko00940//Phenylpropanoid biosynthesis;ko00500//Starch and sucrose metabolism;ko00460//Cyanoamino acid metabolism	K01188;K01188;K01188;K01188;K01188	GO:0009341//beta-galactosidase complex	GO:0004553//hydrolase activity, hydrolyzing O-glycosyl compounds;GO:0004565//beta-galactosidase activity	GO:0005975//carbohydrate metabolic process;GO:0006012//galactose metabolic process;GO:0071704//organic substance metabolic process	--
TraesCS7A03G1360800	241	98	1782	1184	17.706	9.47	168.375	163.461	13.588	165.918	3.61007	2.82975e-26	2.23169e-23	RASTL-1	-	-	-	-	-	GO:0008233//peptidase activity	GO:0006508//proteolysis;GO:0006950//response to stress;GO:0006952//defense response;GO:0008150//biological_process;GO:0009607//response to biotic stimulus;GO:0016032//viral process;GO:0050896//response to stimulus	--
TraesCS6A03G0888100	741	641	4124	4326	12.336	14.035	88.329	135.365	13.1855	111.847	3.0845	4.49173e-26	3.51383e-23	LKR/SDH	Metabolism;Metabolism;Metabolism	Global and overview maps;Global and overview maps;Amino acid metabolism	ko01100//Metabolic pathways;ko01110//Biosynthesis of secondary metabolites;ko00310//Lysine degradation	K14157;K14157;K14157	-	GO:0008839//4-hydroxy-tetrahydrodipicolinate reductase;GO:0016491//oxidoreductase activity;GO:0050112//inositol 2-dehydrogenase activity;GO:0050661//NADP binding	GO:0006813//potassium ion transport;GO:0009089//lysine biosynthetic process via diaminopimelate;GO:0019310//inositol catabolic process;GO:0055114//oxidation-reduction process	--
TraesCS6B03G1065800	1856	1564	9828	10932	27.444	30.429	186.918	303.793	28.9365	245.356	3.08391	4.87253e-26	3.78124e-23	LKR/SDH	Metabolism;Metabolism;Metabolism	Global and overview maps;Global and overview maps;Amino acid metabolism	ko01100//Metabolic pathways;ko01110//Biosynthesis of secondary metabolites;ko00310//Lysine degradation	K14157;K14157;K14157	GO:0005575//cellular_component;GO:0005622//intracellular;GO:0005623//cell;GO:0005737//cytoplasm;GO:0044424//intracellular part;GO:0044464//cell part	GO:0003674//molecular_function;GO:0003824//catalytic activity;GO:0004753//saccharopine dehydrogenase activity;GO:0008839//4-hydroxy-tetrahydrodipicolinate reductase;GO:0016491//oxidoreductase activity;GO:0016645//oxidoreductase activity, acting on the CH-NH group of donors;GO:0016646//oxidoreductase activity, acting on the CH-NH group of donors, NAD or NADP as acceptor;GO:0047130//saccharopine de…	GO:0006082//organic acid metabolic process;GO:0006084//acetyl-CoA metabolic process;GO:0006091//generation of precursor metabolites and energy;GO:0006139//nucleobase-containing compound metabolic process;GO:0006163//purine nucleotide metabolic process;GO:0006520//cellular amino acid metabolic process;GO:0006553//lysine metabolic process;GO:0006554//lysine catabolic process;GO:0006637//acyl-CoA me…	--
TraesCS3B03G0133200	49	93	1052	1276	1.423	3.57	39.502	69.979	2.4965	54.7405	4.45463	5.93494e-26	4.56915e-23	POPTR_0012s05040g	-	-	-	-	GO:0005575//cellular_component;GO:0005622//intracellular;GO:0005623//cell;GO:0005737//cytoplasm;GO:0005739//mitochondrion;GO:0043226//organelle;GO:0043227//membrane-bounded organelle;GO:0043229//intracellular organelle;GO:0043231//intracellular membrane-bounded organelle;GO:0044424//intracellular part;GO:0044444//cytoplasmic part;GO:0044464//cell part	GO:0000287//magnesium ion binding;GO:0003674//molecular_function;GO:0003824//catalytic activity;GO:0004634//phosphopyruvate hydratase activity;GO:0005488//binding;GO:0016829//lyase activity;GO:0016835//carbon-oxygen lyase activity;GO:0016836//hydro-lyase activity;GO:0016853//isomerase activity;GO:0016854//racemase and epimerase activity;GO:0016855//racemase and epimerase activity, acting on amino…	GO:0005975//carbohydrate metabolic process;GO:0006082//organic acid metabolic process;GO:0006096//glycolytic process;GO:0006520//cellular amino acid metabolic process;GO:0006807//nitrogen compound metabolic process;GO:0008150//biological_process;GO:0008152//metabolic process;GO:0009056//catabolic process;GO:0009063//cellular amino acid catabolic process;GO:0009234//menaquinone biosynthetic proces…	--
TraesCS7D03G0548000	99	51	729	875	1.795	1.216	16.998	29.826	1.5055	23.412	3.95893	6.55519e-26	5.00692e-23	CM-LOX2	Metabolism;Metabolism;Metabolism;Metabolism	Global and overview maps;Global and overview maps;Lipid metabolism;Lipid metabolism	ko01100//Metabolic pathways;ko01110//Biosynthesis of secondary metabolites;ko00592//alpha-Linolenic acid metabolism;ko00591//Linoleic acid metabolism	K00454;K00454;K00454;K00454	-	GO:0005515//protein binding;GO:0016702//oxidoreductase activity, acting on single donors with incorporation of molecular oxygen, incorporation of two atoms of oxygen;GO:0046872//metal ion binding	GO:0055114//oxidation-reduction process	--
MSTRG.53907	34	33	485	1019	0.931	1.164	16.956	52.106	1.0475	34.531	5.04287	7.24802e-26	5.49287e-23	LIS	Metabolism;Metabolism	Global and overview maps;Metabolism of terpenoids and polyketides	ko01110//Biosynthesis of secondary metabolites;ko00902//Monoterpenoid biosynthesis	K15086;K15086	GO:0044444//cytoplasmic part	GO:0016829//lyase activity;GO:0043169//cation binding	-	--
TraesCS6A03G0216700	486	228	20	8	24.367	15.021	1.258	0.754	19.694	1.006	-4.29105	7.45598e-26	5.60666e-23	WHAB1.6	Metabolism;Metabolism	Global and overview maps;Energy metabolism	ko01100//Metabolic pathways;ko00196//Photosynthesis - antenna proteins	K08912;K08912	-	GO:0003824//catalytic activity;GO:0046537//2,3-bisphosphoglycerate-independent phosphoglycerate mutase activity	-	--
TraesCS4A03G0873400	33	13	399	638	1.083	0.561	16.854	39.356	0.822	28.105	5.09554	1.02145e-25	7.62187e-23	AMT3-2	-	-	-	-	GO:0016020//membrane	GO:0008519//ammonium transmembrane transporter activity	GO:0015696//ammonium transport	--
TraesCS6D03G0744400	94	78	769	1011	2.048	2.357	22.044	42.745	2.2025	32.3945	3.87853	2.09012e-25	1.54771e-22	SBT1.4	-	-	-	-	-	GO:0008236//serine-type peptidase activity	GO:0006508//proteolysis;GO:0009306//protein secretion	--
TraesCS3A03G0941700	124	119	982	887	6.548	8.265	66.675	88.02	7.4065	77.3475	3.38449	2.60241e-25	1.91245e-22	At5g06060	Metabolism;Metabolism;Metabolism	Global and overview maps;Global and overview maps;Biosynthesis of other secondary metabolites	ko01100//Metabolic pathways;ko01110//Biosynthesis of secondary metabolites;ko00960//Tropane, piperidine and pyridine alkaloid biosynthesis	K08081;K08081;K08081	-	GO:0003824//catalytic activity;GO:0004316//3-oxoacyl-[acyl-carrier-protein] reductase (NADPH) activity;GO:0004488//methylenetetrahydrofolate dehydrogenase (NADP+) activity;GO:0004757//sepiapterin reductase activity;GO:0008667//2,3-dihydro-2,3-dihydroxybenzoate dehydrogenase activity;GO:0008678//2-deoxy-D-gluconate 3-dehydrogenase activity;GO:0016491//oxidoreductase activity;GO:0016630//protochlor…	GO:0000272//polysaccharide catabolic process;GO:0005975//carbohydrate metabolic process;GO:0006633//fatty acid biosynthetic process;GO:0006729//tetrahydrobiopterin biosynthetic process;GO:0015995//chlorophyll biosynthetic process;GO:0055114//oxidation-reduction process	--
TraesCS3B03G0027700	57	49	563	745	1.863	2.106	23.66	45.745	1.9845	34.7025	4.12819	3.02266e-25	2.20459e-22	--	-	-	-	-	-	-	-	--
TraesCS5A03G1073200	1344	1182	183	54	62.938	72.801	11.021	4.752	67.8695	7.8865	-3.10531	3.3019e-25	2.39028e-22	WHAB1.6	Metabolism;Metabolism	Global and overview maps;Energy metabolism	ko01100//Metabolic pathways;ko00196//Photosynthesis - antenna proteins	K08912;K08912	-	-	-	--
TraesCS7D03G0817400	1006	1134	7477	8327	26.497	39.281	253.306	412.207	32.889	332.757	3.33879	3.59221e-25	2.58117e-22	PPH	-	-	-	-	-	GO:0003674//molecular_function;GO:0003824//catalytic activity;GO:0016787//hydrolase activity;GO:0047570//3-oxoadipate enol-lactonase activity;GO:0070205//2-succinyl-6-hydroxy-2,4-cyclohexadiene-1-carboxylate synthase activity	GO:0006629//lipid metabolic process;GO:0009102//biotin biosynthetic process;GO:0009234//menaquinone biosynthetic process;GO:0015979//photosynthesis;GO:0042952//beta-ketoadipate pathway	--
TraesCS1D03G0910800	431	365	2378	2384	13.681	15.229	97.037	142.131	14.455	119.584	3.04838	4.2543e-25	3.03444e-22	--	-	-	-	-	-	GO:0016491//oxidoreductase activity	GO:0055114//oxidation-reduction process	--
TraesCS2A03G0055300	6	8	299	319	0.168	0.294	10.745	16.741	0.231	13.743	5.89466	4.32944e-25	3.0655e-22	CYP71Z18	-	-	-	-	-	GO:0005506//iron ion binding;GO:0016705//oxidoreductase activity, acting on paired donors, with incorporation or reduction of molecular oxygen;GO:0020037//heme binding	GO:0055114//oxidation-reduction process	--
TraesCS6A03G0216900	416	224	16	15	13.547	9.594	0.67	0.918	11.5705	0.794	-3.86517	4.58237e-25	3.22107e-22	WHAB1.6	Metabolism;Metabolism	Global and overview maps;Energy metabolism	ko01100//Metabolic pathways;ko00196//Photosynthesis - antenna proteins	K08912;K08912	-	-	-	--
TraesCS7B03G0598800	214	182	1347	1432	9.089	10.167	73.569	114.3	9.628	93.9345	3.28635	4.92492e-25	3.41728e-22	LHT1	-	-	-	-	GO:0005887//integral component of plasma membrane	GO:0015173//aromatic amino acid transmembrane transporter activity	GO:0003333//amino acid transmembrane transport;GO:0015801//aromatic amino acid transport	--
TraesCS3A03G0102200	20	28	409	623	0.647	1.192	17.005	37.889	0.9195	27.447	4.89966	4.93196e-25	3.41728e-22	POPTR_0012s05040g	-	-	-	-	GO:0005575//cellular_component;GO:0005622//intracellular;GO:0005623//cell;GO:0005737//cytoplasm;GO:0005739//mitochondrion;GO:0043226//organelle;GO:0043227//membrane-bounded organelle;GO:0043229//intracellular organelle;GO:0043231//intracellular membrane-bounded organelle;GO:0044424//intracellular part;GO:0044444//cytoplasmic part;GO:0044464//cell part	GO:0000287//magnesium ion binding;GO:0003674//molecular_function;GO:0003824//catalytic activity;GO:0004634//phosphopyruvate hydratase activity;GO:0005488//binding;GO:0016829//lyase activity;GO:0016835//carbon-oxygen lyase activity;GO:0016836//hydro-lyase activity;GO:0016853//isomerase activity;GO:0016854//racemase and epimerase activity;GO:0016855//racemase and epimerase activity, acting on amino…	GO:0005975//carbohydrate metabolic process;GO:0006082//organic acid metabolic process;GO:0006096//glycolytic process;GO:0006520//cellular amino acid metabolic process;GO:0006807//nitrogen compound metabolic process;GO:0008150//biological_process;GO:0008152//metabolic process;GO:0009056//catabolic process;GO:0009063//cellular amino acid catabolic process;GO:0009234//menaquinone biosynthetic proces…	--
TraesCS3D03G0089300	41	44	511	590	1.274	1.798	20.41	34.464	1.536	27.437	4.15887	5.07339e-25	3.49035e-22	POPTR_0012s05040g	-	-	-	-	GO:0005575//cellular_component;GO:0005622//intracellular;GO:0005623//cell;GO:0005737//cytoplasm;GO:0005739//mitochondrion;GO:0043226//organelle;GO:0043227//membrane-bounded organelle;GO:0043229//intracellular organelle;GO:0043231//intracellular membrane-bounded organelle;GO:0044424//intracellular part;GO:0044444//cytoplasmic part;GO:0044464//cell part	GO:0000287//magnesium ion binding;GO:0003674//molecular_function;GO:0003824//catalytic activity;GO:0004634//phosphopyruvate hydratase activity;GO:0005488//binding;GO:0016829//lyase activity;GO:0016835//carbon-oxygen lyase activity;GO:0016836//hydro-lyase activity;GO:0016853//isomerase activity;GO:0016854//racemase and epimerase activity;GO:0016855//racemase and epimerase activity, acting on amino…	GO:0005975//carbohydrate metabolic process;GO:0006082//organic acid metabolic process;GO:0006096//glycolytic process;GO:0006520//cellular amino acid metabolic process;GO:0006807//nitrogen compound metabolic process;GO:0008150//biological_process;GO:0008152//metabolic process;GO:0009056//catabolic process;GO:0009063//cellular amino acid catabolic process;GO:0009234//menaquinone biosynthetic proces…	--
TraesCS5D03G0600000	486	301	2542	3321	9.253	7.541	62.198	118.765	8.397	90.4815	3.42968	5.41722e-25	3.70065e-22	CSLE6	-	-	-	-	GO:0016020//membrane	GO:0016760//cellulose synthase (UDP-forming) activity	GO:0030244//cellulose biosynthetic process	--
TraesCS4B03G0638000	49	22	465	688	1.314	0.777	16.05	34.723	1.0455	25.3865	4.6018	7.72102e-25	5.23755e-22	CYP90B2	Metabolism;Metabolism;Metabolism	Global and overview maps;Global and overview maps;Metabolism of terpenoids and polyketides	ko01100//Metabolic pathways;ko01110//Biosynthesis of secondary metabolites;ko00905//Brassinosteroid biosynthesis	K09587;K09587;K09587	-	GO:0005506//iron ion binding;GO:0016705//oxidoreductase activity, acting on paired donors, with incorporation or reduction of molecular oxygen;GO:0020037//heme binding	GO:0055114//oxidation-reduction process	--
TraesCS1B03G1166600	205	166	1303	1602	7.381	7.866	60.247	108.231	7.6235	84.239	3.46596	8.07145e-25	5.43724e-22	OsI_032456	Metabolism;Metabolism;Metabolism;Metabolism	Global and overview maps;Global and overview maps;Carbohydrate metabolism;Carbohydrate metabolism	ko01100//Metabolic pathways;ko01110//Biosynthesis of secondary metabolites;ko00520//Amino sugar and nucleotide sugar metabolism;ko00053//Ascorbate and aldarate metabolism	K10046;K10046;K10046;K10046	-	GO:0003824//catalytic activity;GO:0003854//3-beta-hydroxy-delta5-steroid dehydrogenase activity;GO:0003978//UDP-glucose 4-epimerase activity;GO:0004316//3-oxoacyl-[acyl-carrier-protein] reductase (NADPH) activity;GO:0008460//dTDP-glucose 4,6-dehydratase activity;GO:0008667//2,3-dihydro-2,3-dihydroxybenzoate dehydrogenase activity;GO:0008712//ADP-glyceromanno-heptose 6-epimerase activity;GO:001649…	GO:0005975//carbohydrate metabolic process;GO:0006012//galactose metabolic process;GO:0006633//fatty acid biosynthetic process;GO:0006694//steroid biosynthetic process;GO:0009243//O antigen biosynthetic process;GO:0009244//lipopolysaccharide core region biosynthetic process;GO:0019305//dTDP-rhamnose biosynthetic process;GO:0055114//oxidation-reduction process	--
TraesCS5D03G0011500	22	5	367	323	0.674	0.202	14.414	18.528	0.438	16.471	5.23285	8.6971e-25	5.8183e-22	CYP51	Metabolism;Metabolism;Metabolism	Global and overview maps;Global and overview maps;Lipid metabolism	ko01100//Metabolic pathways;ko01110//Biosynthesis of secondary metabolites;ko00100//Steroid biosynthesis	K05917;K05917;K05917	-	GO:0005506//iron ion binding;GO:0016705//oxidoreductase activity, acting on paired donors, with incorporation or reduction of molecular oxygen;GO:0020037//heme binding	GO:0055114//oxidation-reduction process	--
TraesCS6A03G0784600	97	95	824	933	3.266	4.24	35.778	59.23	3.753	47.504	3.66193	9.43059e-25	6.26579e-22	PYD1	Metabolism;Metabolism;Metabolism;Metabolism	Global and overview maps;Nucleotide metabolism;Metabolism of other amino acids;Metabolism of cofactors and vitamins	ko01100//Metabolic pathways;ko00240//Pyrimidine metabolism;ko00410//beta-Alanine metabolism;ko00770//Pantothenate and CoA biosynthesis	K00207;K00207;K00207;K00207	GO:0005737//cytoplasm	GO:0004152//dihydroorotate dehydrogenase activity;GO:0004452//isopentenyl-diphosphate delta-isomerase activity;GO:0015930//glutamate synthase activity;GO:0016491//oxidoreductase activity;GO:0016627//oxidoreductase activity, acting on the CH-CH group of donors;GO:0016638//oxidoreductase activity, acting on the CH-NH2 group of donors;GO:0017150//tRNA dihydrouridine synthase activity;GO:0050660//fla…	GO:0006537//glutamate biosynthetic process;GO:0008033//tRNA processing;GO:0008299//isoprenoid biosynthetic process;GO:0009220//pyrimidine ribonucleotide biosynthetic process;GO:0055114//oxidation-reduction process	--
TraesCS3A03G0172700	105	107	917	1167	3.806	5.101	42.733	79.512	4.4535	61.1225	3.77869	1.00357e-24	6.62244e-22	NAM-B2	-	-	-	-	-	GO:0003677//DNA binding	GO:0006355//regulation of transcription, DNA-templated	NAC
TraesCS1A03G0729600	36	32	429	516	1.192	1.378	18.047	31.739	1.285	24.893	4.2759	1.36878e-24	8.97141e-22	naat-B	-	-	-	-	GO:0005737//cytoplasm	GO:0003674//molecular_function;GO:0003824//catalytic activity;GO:0004015//adenosylmethionine-8-amino-7-oxononanoate transaminase activity;GO:0004400//histidinol-phosphate transaminase activity;GO:0004553//hydrolase activity, hydrolyzing O-glycosyl compounds;GO:0004837//tyrosine decarboxylase activity;GO:0004838//L-tyrosine:2-oxoglutarate aminotransferase activity;GO:0005488//binding;GO:0008144//d…	GO:0000105//histidine biosynthetic process;GO:0005975//carbohydrate metabolic process;GO:0006082//organic acid metabolic process;GO:0006520//cellular amino acid metabolic process;GO:0006531//aspartate metabolic process;GO:0006559//L-phenylalanine catabolic process;GO:0006572//tyrosine catabolic process;GO:0006807//nitrogen compound metabolic process;GO:0008150//biological_process;GO:0008152//meta…	--
TraesCS3D03G0408700	4542	2621	819	414	84.81	64.365	19.667	14.527	74.5875	17.097	-2.12519	1.47111e-24	9.57742e-22	TDT	-	-	-	-	GO:0005887//integral component of plasma membrane;GO:0016020//membrane;GO:0016021//integral component of membrane	GO:0008509//anion transmembrane transporter activity;GO:0022857//transmembrane transporter activity	GO:0006820//anion transport;GO:0055085//transmembrane transport	--
TraesCS1D03G0813600	226	192	1444	1824	3.664	4.099	30.056	55.479	3.8815	42.7675	3.46183	1.91778e-24	1.24022e-21	MIK1	-	-	-	-	-	GO:0004672//protein kinase activity;GO:0005515//protein binding;GO:0005524//ATP binding	GO:0006468//protein phosphorylation	--
TraesCS2B03G0868400	151	113	1000	748	6.306	6.206	53.706	58.697	6.256	56.2015	3.1673	1.93985e-24	1.24618e-21	DMAS1-A	-	-	-	-	-	GO:0047834//D-threo-aldose 1-dehydrogenase activity	-	--
TraesCS7A03G1091300	56	74	713	763	1.744	2.948	29.11	44.695	2.346	36.9025	3.97544	2.45358e-24	1.56584e-21	BGLU25	Metabolism;Metabolism;Metabolism;Metabolism;Metabolism	Global and overview maps;Global and overview maps;Biosynthesis of other secondary metabolites;Carbohydrate metabolism;Metabolism of other amino acids	ko01100//Metabolic pathways;ko01110//Biosynthesis of secondary metabolites;ko00940//Phenylpropanoid biosynthesis;ko00500//Starch and sucrose metabolism;ko00460//Cyanoamino acid metabolism	K01188;K01188;K01188;K01188;K01188	GO:0009341//beta-galactosidase complex	GO:0004553//hydrolase activity, hydrolyzing O-glycosyl compounds;GO:0004565//beta-galactosidase activity	GO:0005975//carbohydrate metabolic process;GO:0006012//galactose metabolic process;GO:0071704//organic substance metabolic process	--
TraesCS2D03G1305300	69	61	607	596	3.039	3.534	34.367	49.373	3.2865	41.87	3.67129	2.71249e-24	1.71975e-21	Sb03g046810	Metabolism;Metabolism;Metabolism	Global and overview maps;Global and overview maps;Biosynthesis of other secondary metabolites	ko01100//Metabolic pathways;ko01110//Biosynthesis of secondary metabolites;ko00940//Phenylpropanoid biosynthesis	K00430;K00430;K00430	-	GO:0004601//peroxidase activity;GO:0020037//heme binding	GO:0006979//response to oxidative stress;GO:0055114//oxidation-reduction process	--
TraesCS5A03G0009500	14	12	313	289	0.558	0.652	16.652	22.432	0.605	19.542	5.0135	2.825e-24	1.77946e-21	3BETAHSD/D1	Metabolism;Metabolism;Metabolism	Global and overview maps;Global and overview maps;Lipid metabolism	ko01100//Metabolic pathways;ko01110//Biosynthesis of secondary metabolites;ko00100//Steroid biosynthesis	K23558;K23558;K23558	-	GO:0003824//catalytic activity;GO:0003854//3-beta-hydroxy-delta5-steroid dehydrogenase activity;GO:0003978//UDP-glucose 4-epimerase activity;GO:0004043//L-aminoadipate-semialdehyde dehydrogenase activity;GO:0008460//dTDP-glucose 4,6-dehydratase activity;GO:0008712//ADP-glyceromanno-heptose 6-epimerase activity;GO:0008831//dTDP-4-dehydrorhamnose reductase activity;GO:0016616//oxidoreductase activi…	GO:0005975//carbohydrate metabolic process;GO:0006012//galactose metabolic process;GO:0006694//steroid biosynthetic process;GO:0009243//O antigen biosynthetic process;GO:0009244//lipopolysaccharide core region biosynthetic process;GO:0019305//dTDP-rhamnose biosynthetic process;GO:0019878//lysine biosynthetic process via aminoadipic acid;GO:0055114//oxidation-reduction process	--
TraesCS2A03G0922700	126	104	932	1377	2.576	2.793	24.489	52.841	2.6845	38.665	3.8483	3.01441e-24	1.88652e-21	PAL	Metabolism;Metabolism;Metabolism;Metabolism	Global and overview maps;Global and overview maps;Biosynthesis of other secondary metabolites;Amino acid metabolism	ko01100//Metabolic pathways;ko01110//Biosynthesis of secondary metabolites;ko00940//Phenylpropanoid biosynthesis;ko00360//Phenylalanine metabolism	K10775;K10775;K10775;K10775	GO:0005575//cellular_component;GO:0005622//intracellular;GO:0005623//cell;GO:0005737//cytoplasm;GO:0044424//intracellular part;GO:0044464//cell part	GO:0003674//molecular_function;GO:0003824//catalytic activity;GO:0004397//histidine ammonia-lyase activity;GO:0016829//lyase activity;GO:0016840//carbon-nitrogen lyase activity;GO:0016841//ammonia-lyase activity;GO:0045548//phenylalanine ammonia-lyase activity;GO:0050368//tyrosine 2,3-aminomutase activity	GO:0006082//organic acid metabolic process;GO:0006520//cellular amino acid metabolic process;GO:0006548//histidine catabolic process;GO:0006558//L-phenylalanine metabolic process;GO:0006559//L-phenylalanine catabolic process;GO:0006725//cellular aromatic compound metabolic process;GO:0006807//nitrogen compound metabolic process;GO:0008150//biological_process;GO:0008152//metabolic process;GO:00090…	--
TraesCS1D03G0829400	54	95	953	1275	2.237	5.199	51.005	99.719	3.718	75.362	4.34124	3.08167e-24	1.91625e-21	CAJ1	-	-	-	-	GO:0016020//membrane	GO:0005515//protein binding;GO:0008863//formate dehydrogenase (NAD+) activity;GO:0009055//electron carrier activity;GO:0050136//NADH dehydrogenase (quinone) activity;GO:0051539//4 iron, 4 sulfur cluster binding;GO:0070283//radical SAM enzyme activity	GO:0006457//protein folding;GO:0009408//response to heat;GO:0015948//methanogenesis;GO:0043687//post-translational protein modification;GO:0045333//cellular respiration;GO:0055114//oxidation-reduction process	--
TraesCS7D03G1264700	807	534	3593	2781	32.481	28.274	186.026	210.376	30.3775	198.201	2.70589	3.12979e-24	1.93377e-21	ecdK	-	-	-	-	-	GO:0016491//oxidoreductase activity	GO:0055114//oxidation-reduction process	--
TraesCS3D03G0118800	43	31	446	767	1.374	1.303	18.333	46.068	1.3385	32.2005	4.58839	3.46071e-24	2.1247e-21	CYP71C4	Metabolism	Global and overview maps	ko01100//Metabolic pathways	K00512	-	GO:0005506//iron ion binding;GO:0016705//oxidoreductase activity, acting on paired donors, with incorporation or reduction of molecular oxygen;GO:0020037//heme binding	GO:0055114//oxidation-reduction process	--
TraesCS6B03G0318900	127	159	1254	1391	3.053	5.034	38.777	62.837	4.0435	50.807	3.65135	3.63052e-24	2.21493e-21	At1g54570	-	-	-	-	-	GO:0016746//transferase activity, transferring acyl groups;GO:0016747//transferase activity, transferring acyl groups other than amino-acyl groups	GO:0009058//biosynthetic process	--
TraesCS2B03G0581100	366	215	18	8	12.323	8.851	0.775	0.561	10.587	0.668	-3.9863	3.79079e-24	2.29826e-21	BMY1	Metabolism;Metabolism;Metabolism	Global and overview maps;Global and overview maps;Carbohydrate metabolism	ko01100//Metabolic pathways;ko01110//Biosynthesis of secondary metabolites;ko00500//Starch and sucrose metabolism	K01177;K01177;K01177	-	GO:0016161//beta-amylase activity	GO:0000272//polysaccharide catabolic process	--
TraesCS6A03G0217000	355	196	6	5	19.618	14.243	0.426	0.519	16.9305	0.4725	-5.16317	4.13977e-24	2.49425e-21	WHAB1.6	Metabolism;Metabolism	Global and overview maps;Energy metabolism	ko01100//Metabolic pathways;ko00196//Photosynthesis - antenna proteins	K08912;K08912	-	GO:0003824//catalytic activity;GO:0046537//2,3-bisphosphoglycerate-independent phosphoglycerate mutase activity	-	--
TraesCS7D03G0445500	294	219	6	7	15.355	15.043	0.403	0.687	15.199	0.545	-4.80158	4.66348e-24	2.79245e-21	WHAB1.6	Metabolism;Metabolism	Global and overview maps;Energy metabolism	ko01100//Metabolic pathways;ko00196//Photosynthesis - antenna proteins	K08912;K08912	-	GO:0003824//catalytic activity;GO:0046537//2,3-bisphosphoglycerate-independent phosphoglycerate mutase activity	-	--
TraesCS2D03G0080400	17	8	289	385	1.07	0.662	23.407	45.534	0.866	34.4705	5.31485	4.93566e-24	2.92829e-21	GSTF1	Metabolism;Metabolism	Global and overview maps;Metabolism of other amino acids	ko01100//Metabolic pathways;ko00480//Glutathione metabolism	K00799;K00799	-	GO:0005515//protein binding;GO:0016034//maleylacetoacetate isomerase activity	GO:0006559//L-phenylalanine catabolic process;GO:0006572//tyrosine catabolic process;GO:0006749//glutathione metabolic process	--
TraesCS6D03G0839000	64	46	548	473	2.039	1.911	22.454	28.331	1.975	25.3925	3.68448	4.95072e-24	2.92829e-21	CYP72A15	-	-	-	-	-	GO:0005506//iron ion binding;GO:0016705//oxidoreductase activity, acting on paired donors, with incorporation or reduction of molecular oxygen;GO:0020037//heme binding	GO:0055114//oxidation-reduction process	--
TraesCS5D03G1236400	19	8	299	376	0.221	0.119	4.556	8.381	0.17	6.4685	5.24982	5.59935e-24	3.29187e-21	ABCG48	-	-	-	-	GO:0005575//cellular_component;GO:0005887//integral component of plasma membrane;GO:0009380//excinuclease repair complex;GO:0009898//cytoplasmic side of plasma membrane;GO:0016020//membrane;GO:0016021//integral component of membrane;GO:0043190//ATP-binding cassette (ABC) transporter complex;GO:0055051//ATP-binding cassette (ABC) transporter complex, integrated substrate binding;GO:0055052//ATP-bi…	GO:0003674//molecular_function;GO:0003924//GTPase activity;GO:0004385//guanylate kinase activity;GO:0005319//lipid transporter activity;GO:0005524//ATP binding;GO:0005525//GTP binding;GO:0008565//protein transporter activity;GO:0009381//excinuclease ABC activity;GO:0015220//choline transmembrane transporter activity;GO:0015221//lipopolysaccharide transmembrane transporter activity;GO:0015412//mol…	GO:0000910//cytokinesis;GO:0002949//tRNA threonylcarbamoyladenosine modification;GO:0006289//nucleotide-excision repair;GO:0006810//transport;GO:0006817//phosphate ion transport;GO:0006824//cobalt ion transport;GO:0006869//lipid transport;GO:0007601//visual perception;GO:0008150//biological_process;GO:0008272//sulfate transport;GO:0015675//nickel cation transport;GO:0015689//molybdate ion transpo…	--
MSTRG.8890	62	38	519	465	1.296	1.045	13.952	18.251	1.1705	16.1015	3.782	6.19677e-24	3.62115e-21	KSL4	Metabolism;Metabolism	Global and overview maps;Metabolism of terpenoids and polyketides	ko01110//Biosynthesis of secondary metabolites;ko00904//Diterpenoid biosynthesis	K14046;K14046	GO:0009536//plastid	GO:0010333//terpene synthase activity;GO:0046872//metal ion binding	GO:0016101//diterpenoid metabolic process	--
TraesCS1A03G0982700	102	88	762	881	4.168	4.713	39.923	67.391	4.4405	53.657	3.59497	7.28983e-24	4.23439e-21	OsI_032456	Metabolism;Metabolism;Metabolism;Metabolism	Global and overview maps;Global and overview maps;Carbohydrate metabolism;Carbohydrate metabolism	ko01100//Metabolic pathways;ko01110//Biosynthesis of secondary metabolites;ko00520//Amino sugar and nucleotide sugar metabolism;ko00053//Ascorbate and aldarate metabolism	K10046;K10046;K10046;K10046	-	GO:0003824//catalytic activity;GO:0003854//3-beta-hydroxy-delta5-steroid dehydrogenase activity;GO:0003978//UDP-glucose 4-epimerase activity;GO:0004316//3-oxoacyl-[acyl-carrier-protein] reductase (NADPH) activity;GO:0008460//dTDP-glucose 4,6-dehydratase activity;GO:0008667//2,3-dihydro-2,3-dihydroxybenzoate dehydrogenase activity;GO:0008712//ADP-glyceromanno-heptose 6-epimerase activity;GO:001649…	GO:0005975//carbohydrate metabolic process;GO:0006012//galactose metabolic process;GO:0006633//fatty acid biosynthetic process;GO:0006694//steroid biosynthetic process;GO:0009243//O antigen biosynthetic process;GO:0009244//lipopolysaccharide core region biosynthetic process;GO:0019305//dTDP-rhamnose biosynthetic process;GO:0055114//oxidation-reduction process	--
TraesCS6D03G0664000	1134	1078	6559	7885	42.307	52.877	314.722	552.824	47.592	433.773	3.18815	7.80364e-24	4.50586e-21	PYD1	Metabolism;Metabolism;Metabolism;Metabolism	Global and overview maps;Nucleotide metabolism;Metabolism of other amino acids;Metabolism of cofactors and vitamins	ko01100//Metabolic pathways;ko00240//Pyrimidine metabolism;ko00410//beta-Alanine metabolism;ko00770//Pantothenate and CoA biosynthesis	K00207;K00207;K00207;K00207	GO:0005575//cellular_component;GO:0005622//intracellular;GO:0005623//cell;GO:0005737//cytoplasm;GO:0005829//cytosol;GO:0009507//chloroplast;GO:0009532//plastid stroma;GO:0009536//plastid;GO:0009570//chloroplast stroma;GO:0043226//organelle;GO:0043227//membrane-bounded organelle;GO:0043229//intracellular organelle;GO:0043231//intracellular membrane-bounded organelle;GO:0044422//organelle part;GO:0…	GO:0000166//nucleotide binding;GO:0002054//nucleobase binding;GO:0002058//uracil binding;GO:0002061//pyrimidine nucleobase binding;GO:0003674//molecular_function;GO:0003824//catalytic activity;GO:0003954//NADH dehydrogenase activity;GO:0004152//dihydroorotate dehydrogenase activity;GO:0004159//dihydrouracil dehydrogenase (NAD+) activity;GO:0004452//isopentenyl-diphosphate delta-isomerase activity…	GO:0001505//regulation of neurotransmitter levels;GO:0006082//organic acid metabolic process;GO:0006139//nucleobase-containing compound metabolic process;GO:0006144//purine nucleobase metabolic process;GO:0006145//purine nucleobase catabolic process;GO:0006206//pyrimidine nucleobase metabolic process;GO:0006207//'de novo' pyrimidine nucleobase biosynthetic process;GO:0006208//pyrimidine nucleobas…	--
TraesCS1D03G0777100	679	596	3920	5285	18.512	21.38	137.441	270.759	19.946	204.1	3.3551	8.3665e-24	4.80227e-21	RD21B	-	-	-	-	GO:0000323//lytic vacuole;GO:0005575//cellular_component;GO:0005576//extracellular region;GO:0005615//extracellular space;GO:0005622//intracellular;GO:0005623//cell;GO:0005737//cytoplasm;GO:0005764//lysosome;GO:0005773//vacuole;GO:0043226//organelle;GO:0043227//membrane-bounded organelle;GO:0043229//intracellular organelle;GO:0043231//intracellular membrane-bounded organelle;GO:0044421//extracell…	GO:0003674//molecular_function;GO:0003824//catalytic activity;GO:0004175//endopeptidase activity;GO:0004197//cysteine-type endopeptidase activity;GO:0008233//peptidase activity;GO:0008234//cysteine-type peptidase activity;GO:0016787//hydrolase activity;GO:0070011//peptidase activity, acting on L-amino acid peptides	GO:0006508//proteolysis;GO:0006807//nitrogen compound metabolic process;GO:0008150//biological_process;GO:0008152//metabolic process;GO:0009056//catabolic process;GO:0009057//macromolecule catabolic process;GO:0009987//cellular process;GO:0019538//protein metabolic process;GO:0030163//protein catabolic process;GO:0043170//macromolecule metabolic process;GO:0044237//cellular metabolic process;GO:0…	--
TraesCS5A03G1181100	2959	1391	421	272	212.736	131.531	38.927	36.748	172.133	37.8375	-2.18564	9.29017e-24	5.27364e-21	--	-	-	-	-	-	-	-	--
TraesCS2D03G0056400	30	10	376	341	0.927	0.406	14.951	19.796	0.6665	17.3735	4.70414	9.29644e-24	5.27364e-21	CYP99A2	Metabolism;Metabolism	Global and overview maps;Metabolism of terpenoids and polyketides	ko01110//Biosynthesis of secondary metabolites;ko00904//Diterpenoid biosynthesis	K16085;K16085	-	GO:0005506//iron ion binding;GO:0016705//oxidoreductase activity, acting on paired donors, with incorporation or reduction of molecular oxygen;GO:0020037//heme binding	GO:0055114//oxidation-reduction process	--
TraesCS2D03G1095800	62	36	543	417	2.066	1.578	23.262	26.113	1.822	24.6875	3.76019	9.5612e-24	5.39229e-21	CYP76T24	-	-	-	-	-	GO:0005506//iron ion binding;GO:0016705//oxidoreductase activity, acting on paired donors, with incorporation or reduction of molecular oxygen;GO:0020037//heme binding	GO:0055114//oxidation-reduction process	--
TraesCS2B03G0083000	47	28	483	356	1.574	1.242	20.931	22.544	1.408	21.7375	3.94847	1.0923e-23	6.12471e-21	GT7	-	-	-	-	-	GO:0008194//UDP-glycosyltransferase activity	-	--
TraesCS4D03G0727500	101	90	752	753	2.736	3.207	26.203	38.321	2.9715	32.262	3.44057	1.85793e-23	1.03578e-20	CYP711A1	-	-	-	-	GO:0005575//cellular_component;GO:0005622//intracellular;GO:0005623//cell;GO:0005737//cytoplasm;GO:0005783//endoplasmic reticulum;GO:0005789//endoplasmic reticulum membrane;GO:0012505//endomembrane system;GO:0016020//membrane;GO:0016021//integral component of membrane;GO:0031224//intrinsic component of membrane;GO:0031984//organelle subcompartment;GO:0042175//nuclear outer membrane-endoplasmic re…	GO:0003674//molecular_function;GO:0003824//catalytic activity;GO:0004497//monooxygenase activity;GO:0004796//thromboxane-A synthase activity;GO:0005488//binding;GO:0005506//iron ion binding;GO:0016491//oxidoreductase activity;GO:0016705//oxidoreductase activity, acting on paired donors, with incorporation or reduction of molecular oxygen;GO:0016853//isomerase activity;GO:0016860//intramolecular o…	GO:0001516//prostaglandin biosynthetic process;GO:0001763//morphogenesis of a branching structure;GO:0006082//organic acid metabolic process;GO:0006629//lipid metabolic process;GO:0006631//fatty acid metabolic process;GO:0006633//fatty acid biosynthetic process;GO:0006636//unsaturated fatty acid biosynthetic process;GO:0006690//icosanoid metabolic process;GO:0006692//prostanoid metabolic process;…	--
TraesCS6B03G0493900LC	7439	5974	1509	590	704.22	743.783	183.688	105.018	724.001	144.353	-2.32639	2.28183e-23	1.26484e-20	--	-	-	-	-	-	-	-	--
TraesCS7B03G0680100	200	261	1886	1930	6.672	11.456	81.08	121.197	9.064	101.138	3.48004	2.39741e-23	1.32136e-20	OMT1	-	-	-	-	-	GO:0003674//molecular_function;GO:0003824//catalytic activity;GO:0005488//binding;GO:0005515//protein binding;GO:0008168//methyltransferase activity;GO:0008171//O-methyltransferase activity;GO:0016740//transferase activity;GO:0016741//transferase activity, transferring one-carbon groups;GO:0046983//protein dimerization activity	GO:0000302//response to reactive oxygen species;GO:0001101//response to acid chemical;GO:0006950//response to stress;GO:0006979//response to oxidative stress;GO:0008150//biological_process;GO:0008152//metabolic process;GO:0009058//biosynthetic process;GO:0009611//response to wounding;GO:0009636//response to toxic substance;GO:0009719//response to endogenous stimulus;GO:0009723//response to ethyle…	--
TraesCS5B03G1170400	256	215	1460	1645	2.784	3.278	20.385	33.611	3.031	26.998	3.15499	3.62475e-23	1.98653e-20	ABCC4	Environmental Information Processing	Membrane transport	ko02010//ABC transporters	K05665	GO:0005575//cellular_component;GO:0005737//cytoplasm;GO:0005887//integral component of plasma membrane;GO:0009380//excinuclease repair complex;GO:0009898//cytoplasmic side of plasma membrane;GO:0016021//integral component of membrane;GO:0043190//ATP-binding cassette (ABC) transporter complex;GO:0055051//ATP-binding cassette (ABC) transporter complex, integrated substrate binding;GO:0055052//ATP-b…	GO:0000166//nucleotide binding;GO:0003677//DNA binding;GO:0003924//GTPase activity;GO:0005260//channel-conductance-controlling ATPase activity;GO:0005319//lipid transporter activity;GO:0005524//ATP binding;GO:0005525//GTP binding;GO:0008565//protein transporter activity;GO:0009381//excinuclease ABC activity;GO:0015220//choline transmembrane transporter activity;GO:0015221//lipopolysaccharide tran…	GO:0000910//cytokinesis;GO:0006289//nucleotide-excision repair;GO:0006810//transport;GO:0006817//phosphate ion transport;GO:0006824//cobalt ion transport;GO:0006855//drug transmembrane transport;GO:0006869//lipid transport;GO:0007601//visual perception;GO:0008150//biological_process;GO:0008272//sulfate transport;GO:0015675//nickel cation transport;GO:0015689//molybdate ion transport;GO:0015706//n…	--
TraesCS5B03G1160800	27	34	411	548	1.105	1.83	21.63	42.14	1.4675	31.885	4.44145	3.83026e-23	2.08736e-20	UGT91D2	-	-	-	-	-	GO:0008194//UDP-glycosyltransferase activity;GO:0016758//transferase activity, transferring hexosyl groups	GO:0005975//carbohydrate metabolic process;GO:0030259//lipid glycosylation	--
TraesCS4B03G0546200	30	34	409	524	1.252	1.871	21.905	41.012	1.5615	31.4585	4.33245	4.23189e-23	2.29335e-20	At3g11180	-	-	-	-	-	GO:0016491//oxidoreductase activity	GO:0055114//oxidation-reduction process	--
TraesCS1A03G0855200	21	20	322	417	0.535	0.659	10.524	19.97	0.597	15.247	4.67465	4.57054e-23	2.46312e-20	CYP72A15	-	-	-	-	-	GO:0005506//iron ion binding;GO:0016705//oxidoreductase activity, acting on paired donors, with incorporation or reduction of molecular oxygen;GO:0020037//heme binding	GO:0055114//oxidation-reduction process	--
TraesCS6A03G0217100	340	273	25	6	25.173	26.589	2.381	0.835	25.881	1.608	-4.00855	4.88654e-23	2.61886e-20	WHAB1.6	Metabolism;Metabolism	Global and overview maps;Energy metabolism	ko01100//Metabolic pathways;ko00196//Photosynthesis - antenna proteins	K08912;K08912	-	GO:0003824//catalytic activity;GO:0046537//2,3-bisphosphoglycerate-independent phosphoglycerate mutase activity	-	--
TraesCS3A03G0582200	5	2	271	441	0.176	0.092	12.236	29.094	0.134	20.665	7.26881	5.64311e-23	3.00772e-20	At5g41800	-	-	-	-	-	-	-	--
TraesCS7B03G1262000	20	7	286	407	0.707	0.322	12.985	27.027	0.5145	20.006	5.28112	5.68666e-23	3.01436e-20	CYP71Z18	-	-	-	-	-	GO:0005506//iron ion binding;GO:0016705//oxidoreductase activity, acting on paired donors, with incorporation or reduction of molecular oxygen;GO:0020037//heme binding	GO:0055114//oxidation-reduction process	--
TraesCS3B03G0217600	42	40	448	603	1.832	2.294	25.142	49.397	2.063	37.2695	4.17518	5.8227e-23	3.0697e-20	NAM-B2	-	-	-	-	-	GO:0003677//DNA binding	GO:0006355//regulation of transcription, DNA-templated	NAC
TraesCS3B03G1311100	22	9	290	478	0.933	0.502	15.827	38.095	0.7175	26.961	5.23175	6.83058e-23	3.58159e-20	VIT_06s0061g00120	-	-	-	-	-	GO:0004553//hydrolase activity, hydrolyzing O-glycosyl compounds	GO:0005975//carbohydrate metabolic process	--
TraesCS2D03G0270100	101	87	721	769	2.631	2.981	24.159	37.65	2.806	30.9045	3.46123	7.72443e-23	4.01442e-20	SIT2	-	-	-	-	-	GO:0004672//protein kinase activity;GO:0005524//ATP binding;GO:0030246//carbohydrate binding	GO:0006468//protein phosphorylation	--
TraesCS1A03G0845500	273	220	1531	1929	3.232	3.429	23.337	42.977	3.3305	33.157	3.3155	7.73882e-23	4.01442e-20	MIK1	-	-	-	-	-	GO:0004672//protein kinase activity;GO:0005515//protein binding;GO:0005524//ATP binding	GO:0006468//protein phosphorylation	--
TraesCS4D03G0492800	51	44	482	454	2.616	2.992	32.053	44.113	2.804	38.083	3.76359	8.02103e-23	4.13868e-20	IN2-1	Metabolism;Metabolism	Global and overview maps;Metabolism of other amino acids	ko01100//Metabolic pathways;ko00480//Glutathione metabolism	K00799;K00799	-	GO:0005515//protein binding;GO:0015035//protein disulfide oxidoreductase activity;GO:0016034//maleylacetoacetate isomerase activity	GO:0006559//L-phenylalanine catabolic process;GO:0006572//tyrosine catabolic process;GO:0006749//glutathione metabolic process;GO:0006790//sulfur compound metabolic process;GO:0042965//glutaredoxin biosynthetic process;GO:0045454//cell redox homeostasis;GO:0055114//oxidation-reduction process	--
TraesCS3A03G0659300	42	38	471	368	0.588	0.694	8.417	9.597	0.641	9.007	3.81265	1.01527e-22	5.21088e-20	ABCB11	Environmental Information Processing	Membrane transport	ko02010//ABC transporters	K05658	GO:0005575//cellular_component;GO:0005737//cytoplasm;GO:0005887//integral component of plasma membrane;GO:0009380//excinuclease repair complex;GO:0009898//cytoplasmic side of plasma membrane;GO:0016021//integral component of membrane;GO:0043190//ATP-binding cassette (ABC) transporter complex;GO:0055051//ATP-binding cassette (ABC) transporter complex, integrated substrate binding;GO:0055052//ATP-b…	GO:0003676//nucleic acid binding;GO:0003924//GTPase activity;GO:0004020//adenylylsulfate kinase activity;GO:0004140//dephospho-CoA kinase activity;GO:0005260//channel-conductance-controlling ATPase activity;GO:0005319//lipid transporter activity;GO:0005524//ATP binding;GO:0005525//GTP binding;GO:0008565//protein transporter activity;GO:0009381//excinuclease ABC activity;GO:0015220//choline transm…	GO:0000910//cytokinesis;GO:0006289//nucleotide-excision repair;GO:0006790//sulfur compound metabolic process;GO:0006810//transport;GO:0006817//phosphate ion transport;GO:0006824//cobalt ion transport;GO:0006855//drug transmembrane transport;GO:0006869//lipid transport;GO:0007186//G-protein coupled receptor signaling pathway;GO:0007601//visual perception;GO:0008150//biological_process;GO:0008272//…	--
TraesCS4D03G0730500	18	3	296	340	0.709	0.134	14.972	25.154	0.4215	20.063	5.57286	1.0286e-22	5.25149e-20	UGT85A24	-	-	-	-	-	GO:0008194//UDP-glycosyltransferase activity	-	--
TraesCS7B03G0876600	477	348	54	42	17.19	16.473	2.485	2.844	16.8315	2.6645	-2.65923	1.09725e-22	5.57267e-20	XTH25	-	-	-	-	GO:0005618//cell wall;GO:0048046//apoplast	GO:0004553//hydrolase activity, hydrolyzing O-glycosyl compounds;GO:0016762//xyloglucan:xyloglucosyl transferase activity	GO:0005975//carbohydrate metabolic process;GO:0006073//cellular glucan metabolic process	--
TraesCS4A03G0035600	99	114	883	994	4.58	6.936	52.556	86.44	5.758	69.498	3.59333	1.17376e-22	5.93018e-20	--	-	-	-	-	-	-	-	--
TraesCS3D03G0647800	962	679	154	135	26.853	24.928	5.529	7.081	25.8905	6.305	-2.03785	1.24385e-22	6.25171e-20	BURP3	-	-	-	-	-	-	-	--
TraesCS3D03G1056700	26	24	365	311	1.179	1.43	21.19	26.343	1.3045	23.7665	4.18736	2.20917e-22	1.10463e-19	BANGLUC	-	-	-	-	-	GO:0003674//molecular_function;GO:0003824//catalytic activity;GO:0004553//hydrolase activity, hydrolyzing O-glycosyl compounds;GO:0008422//beta-glucosidase activity;GO:0015926//glucosidase activity;GO:0016787//hydrolase activity;GO:0016798//hydrolase activity, acting on glycosyl bonds;GO:0042973//glucan endo-1,3-beta-D-glucosidase activity	GO:0000272//polysaccharide catabolic process;GO:0005975//carbohydrate metabolic process;GO:0005976//polysaccharide metabolic process;GO:0006073//cellular glucan metabolic process;GO:0006074//(1->3)-beta-D-glucan metabolic process;GO:0006076//(1->3)-beta-D-glucan catabolic process;GO:0006950//response to stress;GO:0006952//defense response;GO:0008150//biological_process;GO:0008152//metabolic proce…	--
TraesCS2D03G0971900	215	170	1301	2017	9.568	9.964	74.569	168.914	9.766	121.742	3.63991	2.38786e-22	1.18785e-19	XTH8	Environmental Information Processing	Signal transduction	ko04075//Plant hormone signal transduction	K14504	GO:0005618//cell wall;GO:0048046//apoplast	GO:0004553//hydrolase activity, hydrolyzing O-glycosyl compounds;GO:0016762//xyloglucan:xyloglucosyl transferase activity	GO:0005975//carbohydrate metabolic process;GO:0006073//cellular glucan metabolic process	--
TraesCS5B03G1264200	43	47	472	600	1.4	2.013	19.757	36.711	1.7065	28.234	4.04832	3.24726e-22	1.60713e-19	AMT3-2	-	-	-	-	GO:0016020//membrane	GO:0008519//ammonium transmembrane transporter activity	GO:0015696//ammonium transport	--
TraesCS3D03G0601600	41	26	381	429	0.555	0.456	6.569	10.798	0.5055	8.6835	4.10249	3.44734e-22	1.69749e-19	ABCB4	Environmental Information Processing	Membrane transport	ko02010//ABC transporters	K05658	GO:0005575//cellular_component;GO:0005737//cytoplasm;GO:0005887//integral component of plasma membrane;GO:0009288//bacterial-type flagellum;GO:0009380//excinuclease repair complex;GO:0009898//cytoplasmic side of plasma membrane;GO:0016021//integral component of membrane;GO:0043190//ATP-binding cassette (ABC) transporter complex;GO:0055051//ATP-binding cassette (ABC) transporter complex, integrate…	GO:0003674//molecular_function;GO:0003924//GTPase activity;GO:0004020//adenylylsulfate kinase activity;GO:0004140//dephospho-CoA kinase activity;GO:0005260//channel-conductance-controlling ATPase activity;GO:0005319//lipid transporter activity;GO:0005524//ATP binding;GO:0005525//GTP binding;GO:0008565//protein transporter activity;GO:0009381//excinuclease ABC activity;GO:0015220//choline transmem…	GO:0000910//cytokinesis;GO:0001539//cilium or flagellum-dependent cell motility;GO:0006289//nucleotide-excision repair;GO:0006790//sulfur compound metabolic process;GO:0006810//transport;GO:0006817//phosphate ion transport;GO:0006824//cobalt ion transport;GO:0006855//drug transmembrane transport;GO:0006869//lipid transport;GO:0007186//G-protein coupled receptor signaling pathway;GO:0007601//visua…	--
TraesCS7D03G1142200	181	170	1138	1096	5.87	7.264	47.536	66.93	6.567	57.233	3.12354	3.60751e-22	1.76739e-19	HPT1	Metabolism;Metabolism;Metabolism	Global and overview maps;Global and overview maps;Metabolism of cofactors and vitamins	ko01100//Metabolic pathways;ko01110//Biosynthesis of secondary metabolites;ko00130//Ubiquinone and other terpenoid-quinone biosynthesis	K09833;K09833;K09833	GO:0016021//integral component of membrane	GO:0016765//transferase activity, transferring alkyl or aryl (other than methyl) groups;GO:0016767//geranylgeranyl-diphosphate geranylgeranyltransferase activity;GO:0046408//chlorophyll synthetase activity;GO:0046428//1,4-dihydroxy-2-naphthoate octaprenyltransferase activity	GO:0009234//menaquinone biosynthetic process	--
TraesCS1D03G0972500	136	147	1048	1281	11.154	15.857	110.546	197.511	13.5055	154.029	3.51158	4.32788e-22	2.10966e-19	--	-	-	-	-	-	-	-	--
TraesCS2D03G0721200	104	118	906	778	6.052	9.031	67.803	85.066	7.5415	76.4345	3.3413	4.35998e-22	2.11468e-19	DMAS1-A	-	-	-	-	-	GO:0047834//D-threo-aldose 1-dehydrogenase activity	-	--
TraesCS7D03G0910600	596	324	2544	2244	7.843	5.605	43.061	55.627	6.724	49.344	2.87548	4.59024e-22	2.21528e-19	ABCG44	-	-	-	-	GO:0005575//cellular_component;GO:0005737//cytoplasm;GO:0005887//integral component of plasma membrane;GO:0009379//Holliday junction helicase complex;GO:0009380//excinuclease repair complex;GO:0009898//cytoplasmic side of plasma membrane;GO:0016020//membrane;GO:0016021//integral component of membrane;GO:0043190//ATP-binding cassette (ABC) transporter complex;GO:0055051//ATP-binding cassette (ABC)…	GO:0000166//nucleotide binding;GO:0003674//molecular_function;GO:0003924//GTPase activity;GO:0004386//helicase activity;GO:0005260//channel-conductance-controlling ATPase activity;GO:0005319//lipid transporter activity;GO:0005524//ATP binding;GO:0005525//GTP binding;GO:0008565//protein transporter activity;GO:0009378//four-way junction helicase activity;GO:0009381//excinuclease ABC activity;GO:00…	GO:0000910//cytokinesis;GO:0002949//tRNA threonylcarbamoyladenosine modification;GO:0006281//DNA repair;GO:0006289//nucleotide-excision repair;GO:0006310//DNA recombination;GO:0006400//tRNA modification;GO:0006464//cellular protein modification process;GO:0006810//transport;GO:0006817//phosphate ion transport;GO:0006824//cobalt ion transport;GO:0006869//lipid transport;GO:0007601//visual percepti…	--
TraesCS4A03G1252200	50	31	417	471	5.357	4.37	57.623	95.167	4.8635	76.395	3.97341	4.69403e-22	2.25416e-19	Os12g0628600	-	-	-	-	-	-	-	--
TraesCS3B03G1366600	81	80	663	844	2.005	2.613	21.161	39.386	2.309	30.2735	3.71272	4.74126e-22	2.26562e-19	DOX1	Metabolism	Lipid metabolism	ko00592//alpha-Linolenic acid metabolism	K10529	-	-	-	--
TraesCS6D03G0526000	737	564	3202	3193	14.8	16.725	86.803	125.905	15.7625	106.354	2.75431	4.89636e-22	2.32827e-19	PAL	Metabolism;Metabolism;Metabolism;Metabolism	Global and overview maps;Global and overview maps;Biosynthesis of other secondary metabolites;Amino acid metabolism	ko01100//Metabolic pathways;ko01110//Biosynthesis of secondary metabolites;ko00940//Phenylpropanoid biosynthesis;ko00360//Phenylalanine metabolism	K13064;K13064;K13064;K13064	GO:0005575//cellular_component;GO:0005622//intracellular;GO:0005623//cell;GO:0005737//cytoplasm;GO:0044424//intracellular part;GO:0044464//cell part	GO:0003674//molecular_function;GO:0003824//catalytic activity;GO:0004397//histidine ammonia-lyase activity;GO:0016829//lyase activity;GO:0016840//carbon-nitrogen lyase activity;GO:0016841//ammonia-lyase activity;GO:0045548//phenylalanine ammonia-lyase activity;GO:0050368//tyrosine 2,3-aminomutase activity	GO:0006082//organic acid metabolic process;GO:0006520//cellular amino acid metabolic process;GO:0006548//histidine catabolic process;GO:0006558//L-phenylalanine metabolic process;GO:0006559//L-phenylalanine catabolic process;GO:0006725//cellular aromatic compound metabolic process;GO:0006807//nitrogen compound metabolic process;GO:0008150//biological_process;GO:0008152//metabolic process;GO:00090…	--
TraesCS7D03G1237700	6	1	264	368	0.203	0.044	11.052	22.654	0.1235	16.853	7.09235	5.12337e-22	2.42433e-19	ACA7	Metabolism;Metabolism	Global and overview maps;Energy metabolism	ko01100//Metabolic pathways;ko00910//Nitrogen metabolism	K01674;K01674	-	-	-	--
TraesCS1B03G0501600	273	303	1	5	14.44	21.077	0.068	0.497	17.7585	0.2825	-5.97412	5.51531e-22	2.59712e-19	--	-	-	-	-	-	GO:0003723//RNA binding;GO:0033897//ribonuclease T2 activity	-	--
TraesCSU03G0036600	109	52	680	1019	3.666	2.295	29.504	64.593	2.9805	47.0485	3.98052	6.28325e-22	2.94445e-19	--	-	-	-	-	-	-	-	--
TraesCS2B03G0307500	244	113	2179	943	11.047	6.733	126.906	80.244	8.89	103.575	3.54235	8.54677e-22	3.98592e-19	PRX112	Metabolism;Metabolism;Metabolism	Global and overview maps;Global and overview maps;Biosynthesis of other secondary metabolites	ko01100//Metabolic pathways;ko01110//Biosynthesis of secondary metabolites;ko00940//Phenylpropanoid biosynthesis	K00430;K00430;K00430	-	GO:0004601//peroxidase activity;GO:0020037//heme binding	GO:0006979//response to oxidative stress;GO:0055114//oxidation-reduction process	--
TraesCS4D03G0631000	46	39	476	352	2.158	2.406	28.715	31.027	2.282	29.871	3.71037	8.93771e-22	4.1483e-19	--	-	-	-	-	-	-	-	--
TraesCS1D03G0951700	411	313	2041	2656	13.618	13.615	86.935	165.264	13.6165	126.1	3.21113	9.37848e-22	4.33214e-19	OsI_032456	Metabolism;Metabolism;Metabolism;Metabolism	Global and overview maps;Global and overview maps;Carbohydrate metabolism;Carbohydrate metabolism	ko01100//Metabolic pathways;ko01110//Biosynthesis of secondary metabolites;ko00520//Amino sugar and nucleotide sugar metabolism;ko00053//Ascorbate and aldarate metabolism	K10046;K10046;K10046;K10046	-	GO:0003824//catalytic activity;GO:0003854//3-beta-hydroxy-delta5-steroid dehydrogenase activity;GO:0003978//UDP-glucose 4-epimerase activity;GO:0004316//3-oxoacyl-[acyl-carrier-protein] reductase (NADPH) activity;GO:0008460//dTDP-glucose 4,6-dehydratase activity;GO:0008667//2,3-dihydro-2,3-dihydroxybenzoate dehydrogenase activity;GO:0008712//ADP-glyceromanno-heptose 6-epimerase activity;GO:001649…	GO:0005975//carbohydrate metabolic process;GO:0006012//galactose metabolic process;GO:0006633//fatty acid biosynthetic process;GO:0006694//steroid biosynthetic process;GO:0009243//O antigen biosynthetic process;GO:0009244//lipopolysaccharide core region biosynthetic process;GO:0019305//dTDP-rhamnose biosynthetic process;GO:0055114//oxidation-reduction process	--
TraesCS2A03G0826800	328	224	1653	2392	5.076	4.714	32.943	69.781	4.895	51.362	3.39132	1.36709e-21	6.28501e-19	maoI	Metabolism;Metabolism;Metabolism;Metabolism;Metabolism;Metabolism;Metabolism;Metabolism	Global and overview maps;Global and overview maps;Amino acid metabolism;Amino acid metabolism;Amino acid metabolism;Metabolism of other amino acids;Biosynthesis of other secondary metabolites;Biosynthesis of other secondary metabolites	ko01100//Metabolic pathways;ko01110//Biosynthesis of secondary metabolites;ko00260//Glycine, serine and threonine metabolism;ko00360//Phenylalanine metabolism;ko00350//Tyrosine metabolism;ko00410//beta-Alanine metabolism;ko00950//Isoquinoline alkaloid biosynthesis;ko00960//Tropane, piperidine and pyridine alkaloid biosynthesis	K00276;K00276;K00276;K00276;K00276;K00276;K00276;K00276	-	GO:0005507//copper ion binding;GO:0008131//primary amine oxidase activity;GO:0048038//quinone binding	GO:0009308//amine metabolic process;GO:0055114//oxidation-reduction process	--
TraesCS7A03G0945700	39	20	351	503	0.468	0.271	5.413	10.013	0.3695	7.713	4.38365	1.52423e-21	6.97437e-19	ABCG44	-	-	-	-	GO:0005575//cellular_component;GO:0005737//cytoplasm;GO:0005887//integral component of plasma membrane;GO:0009379//Holliday junction helicase complex;GO:0009380//excinuclease repair complex;GO:0009898//cytoplasmic side of plasma membrane;GO:0016020//membrane;GO:0016021//integral component of membrane;GO:0043190//ATP-binding cassette (ABC) transporter complex;GO:0055051//ATP-binding cassette (ABC)…	GO:0000166//nucleotide binding;GO:0003674//molecular_function;GO:0003924//GTPase activity;GO:0004386//helicase activity;GO:0005260//channel-conductance-controlling ATPase activity;GO:0005319//lipid transporter activity;GO:0005524//ATP binding;GO:0005525//GTP binding;GO:0008565//protein transporter activity;GO:0009378//four-way junction helicase activity;GO:0009381//excinuclease ABC activity;GO:00…	GO:0000910//cytokinesis;GO:0002949//tRNA threonylcarbamoyladenosine modification;GO:0006281//DNA repair;GO:0006289//nucleotide-excision repair;GO:0006310//DNA recombination;GO:0006400//tRNA modification;GO:0006464//cellular protein modification process;GO:0006810//transport;GO:0006817//phosphate ion transport;GO:0006824//cobalt ion transport;GO:0006869//lipid transport;GO:0007601//visual percepti…	--
TraesCS1B03G0892400	17219	11958	3112	1013	498.199	455.027	115.814	55.071	476.613	85.4425	-2.47979	1.64628e-21	7.49746e-19	At1g56190	Metabolism;Metabolism;Metabolism;Metabolism;Metabolism;Metabolism	Global and overview maps;Global and overview maps;Global and overview maps;Global and overview maps;Carbohydrate metabolism;Energy metabolism	ko01100//Metabolic pathways;ko01110//Biosynthesis of secondary metabolites;ko01200//Carbon metabolism;ko01230//Biosynthesis of amino acids;ko00010//Glycolysis / Gluconeogenesis;ko00710//Carbon fixation in photosynthetic organisms	K00927;K00927;K00927;K00927;K00927;K00927	GO:0005575//cellular_component;GO:0005622//intracellular;GO:0005623//cell;GO:0005737//cytoplasm;GO:0009507//chloroplast;GO:0009536//plastid;GO:0043226//organelle;GO:0043227//membrane-bounded organelle;GO:0043229//intracellular organelle;GO:0043231//intracellular membrane-bounded organelle;GO:0044424//intracellular part;GO:0044444//cytoplasmic part;GO:0044464//cell part	GO:0000156//phosphorelay response regulator activity;GO:0000166//nucleotide binding;GO:0003674//molecular_function;GO:0003677//DNA binding;GO:0003824//catalytic activity;GO:0004618//phosphoglycerate kinase activity;GO:0005488//binding;GO:0005524//ATP binding;GO:0008144//drug binding;GO:0016301//kinase activity;GO:0016740//transferase activity;GO:0016772//transferase activity, transferring phospho…	GO:0000160//phosphorelay signal transduction system;GO:0005975//carbohydrate metabolic process;GO:0006082//organic acid metabolic process;GO:0006090//pyruvate metabolic process;GO:0006091//generation of precursor metabolites and energy;GO:0006096//glycolytic process;GO:0006139//nucleobase-containing compound metabolic process;GO:0006163//purine nucleotide metabolic process;GO:0006164//purine nucl…	--
TraesCS2B03G0306300	156	85	1107	625	7.452	5.342	67.98	56.091	6.397	62.0355	3.27763	1.74078e-21	7.89079e-19	PRX112	Metabolism;Metabolism;Metabolism	Global and overview maps;Global and overview maps;Biosynthesis of other secondary metabolites	ko01100//Metabolic pathways;ko01110//Biosynthesis of secondary metabolites;ko00940//Phenylpropanoid biosynthesis	K00430;K00430;K00430	-	GO:0004601//peroxidase activity;GO:0020037//heme binding	GO:0006979//response to oxidative stress;GO:0055114//oxidation-reduction process	--
TraesCS7A03G0869800	151	127	956	1422	2.106	2.307	16.906	37.063	2.2065	26.9845	3.6123	1.8967e-21	8.55756e-19	ABCG42	-	-	-	-	GO:0005575//cellular_component;GO:0005887//integral component of plasma membrane;GO:0009380//excinuclease repair complex;GO:0009898//cytoplasmic side of plasma membrane;GO:0016020//membrane;GO:0016021//integral component of membrane;GO:0043190//ATP-binding cassette (ABC) transporter complex;GO:0055051//ATP-binding cassette (ABC) transporter complex, integrated substrate binding;GO:0055052//ATP-bi…	GO:0003924//GTPase activity;GO:0005319//lipid transporter activity;GO:0005524//ATP binding;GO:0005525//GTP binding;GO:0008565//protein transporter activity;GO:0009381//excinuclease ABC activity;GO:0015220//choline transmembrane transporter activity;GO:0015221//lipopolysaccharide transmembrane transporter activity;GO:0015412//molybdate transmembrane-transporting ATPase activity;GO:0015413//nickel-…	GO:0000910//cytokinesis;GO:0006289//nucleotide-excision repair;GO:0006810//transport;GO:0006817//phosphate ion transport;GO:0006824//cobalt ion transport;GO:0006869//lipid transport;GO:0007601//visual perception;GO:0008150//biological_process;GO:0008272//sulfate transport;GO:0015675//nickel cation transport;GO:0015689//molybdate ion transport;GO:0015706//nitrate transport;GO:0015716//organic phos…	--
TraesCS7B03G0050900	8893	6892	1886	704	342.082	348.686	93.304	50.889	345.384	72.0965	-2.2602	2.07604e-21	9.31013e-19	DIN1	-	-	-	-	-	-	GO:0001887//selenium compound metabolic process;GO:0006400//tRNA modification	--
TraesCS2D03G0388700	201	198	1256	1310	9.237	12.071	74.742	113.331	10.654	94.0365	3.14183	2.0827e-21	9.31013e-19	ANR	-	-	-	-	-	GO:0003824//catalytic activity;GO:0003854//3-beta-hydroxy-delta5-steroid dehydrogenase activity;GO:0003978//UDP-glucose 4-epimerase activity;GO:0008460//dTDP-glucose 4,6-dehydratase activity;GO:0008712//ADP-glyceromanno-heptose 6-epimerase activity;GO:0016616//oxidoreductase activity, acting on the CH-OH group of donors, NAD or NADP as acceptor;GO:0016757//transferase activity, transferring glyco…	GO:0005975//carbohydrate metabolic process;GO:0006012//galactose metabolic process;GO:0006694//steroid biosynthetic process;GO:0009243//O antigen biosynthetic process;GO:0009244//lipopolysaccharide core region biosynthetic process;GO:0019305//dTDP-rhamnose biosynthetic process;GO:0055114//oxidation-reduction process	--
TraesCS2D03G1146600	5793	4572	23083	23380	174.06	180.655	891.93	1319.99	177.357	1105.96	2.64057	2.29061e-21	1.01926e-18	Os04g0650000	-	-	-	-	-	GO:0008234//cysteine-type peptidase activity	GO:0006508//proteolysis	--
TraesCS4D03G0705200	2018	1659	366	118	209.067	226.057	48.766	22.973	217.562	35.8695	-2.6006	2.46068e-21	1.08993e-18	RBBI3.3	-	-	-	-	GO:0005576//extracellular region	GO:0004867//serine-type endopeptidase inhibitor activity	GO:0006629//lipid metabolic process	--
TraesCS7D03G0884200	6484	5926	1526	616	187.585	225.507	56.783	33.484	206.546	45.1335	-2.19419	2.55548e-21	1.12678e-18	MPAO1	Metabolism;Metabolism;Metabolism	Global and overview maps;Amino acid metabolism;Metabolism of other amino acids	ko01100//Metabolic pathways;ko00330//Arginine and proline metabolism;ko00410//beta-Alanine metabolism	K13366;K13366;K13366	-	GO:0003824//catalytic activity;GO:0004729//oxygen-dependent protoporphyrinogen oxidase activity;GO:0004791//thioredoxin-disulfide reductase activity;GO:0016166//phytoene dehydrogenase activity;GO:0016491//oxidoreductase activity;GO:0071949//FAD binding	GO:0006779//porphyrin-containing compound biosynthetic process;GO:0009228//thiamine biosynthetic process;GO:0016117//carotenoid biosynthetic process;GO:0055114//oxidation-reduction process	--
TraesCS6B03G0213700	138	91	808	1226	3.951	3.426	29.749	65.955	3.6885	47.852	3.69747	2.59209e-21	1.13775e-18	LIS	Metabolism;Metabolism	Global and overview maps;Metabolism of terpenoids and polyketides	ko01110//Biosynthesis of secondary metabolites;ko00902//Monoterpenoid biosynthesis	K15086;K15086	-	GO:0000287//magnesium ion binding;GO:0010333//terpene synthase activity;GO:0016829//lyase activity	-	--
TraesCS2B03G0799700	107	105	861	604	1.802	2.334	18.712	19.187	2.068	18.9495	3.19585	2.9952e-21	1.30877e-18	HAK1	-	-	-	-	GO:0016020//membrane	GO:0015079//potassium ion transmembrane transporter activity	GO:0006813//potassium ion transport;GO:0071805//potassium ion transmembrane transport	--
TraesCS1D03G0994500	96	75	625	674	2.413	2.48	20.205	31.837	2.4465	26.021	3.41089	3.24962e-21	1.41357e-18	SLAH2	-	-	-	-	GO:0016021//integral component of membrane	-	GO:0055085//transmembrane transport	--
TraesCS3D03G0602100	50	37	438	374	0.711	0.701	8.051	10.064	0.706	9.0575	3.68137	3.29553e-21	1.42714e-18	ABCB11	Environmental Information Processing	Membrane transport	ko02010//ABC transporters	K05658	GO:0005575//cellular_component;GO:0005737//cytoplasm;GO:0005887//integral component of plasma membrane;GO:0009380//excinuclease repair complex;GO:0009898//cytoplasmic side of plasma membrane;GO:0016021//integral component of membrane;GO:0043190//ATP-binding cassette (ABC) transporter complex;GO:0055051//ATP-binding cassette (ABC) transporter complex, integrated substrate binding;GO:0055052//ATP-b…	GO:0003674//molecular_function;GO:0003676//nucleic acid binding;GO:0003924//GTPase activity;GO:0004020//adenylylsulfate kinase activity;GO:0004140//dephospho-CoA kinase activity;GO:0004849//uridine kinase activity;GO:0005260//channel-conductance-controlling ATPase activity;GO:0005319//lipid transporter activity;GO:0005524//ATP binding;GO:0005525//GTP binding;GO:0008565//protein transporter activi…	GO:0000910//cytokinesis;GO:0006289//nucleotide-excision repair;GO:0006790//sulfur compound metabolic process;GO:0006810//transport;GO:0006817//phosphate ion transport;GO:0006824//cobalt ion transport;GO:0006855//drug transmembrane transport;GO:0006869//lipid transport;GO:0007186//G-protein coupled receptor signaling pathway;GO:0007601//visual perception;GO:0008150//biological_process;GO:0008272//…	--
TraesCS5A03G0748900	65	43	469	543	1.627	1.416	15.102	25.548	1.5215	20.325	3.73969	3.32589e-21	1.43389e-18	SCPL18	-	-	-	-	-	GO:0004185//serine-type carboxypeptidase activity	GO:0006508//proteolysis	--
TraesCS6B03G0493800	25319	19764	5353	1909	1784.37	1831.96	485.172	252.844	1808.17	369.008	-2.2928	4.28392e-21	1.83875e-18	CAB8	Metabolism;Metabolism	Global and overview maps;Energy metabolism	ko01100//Metabolic pathways;ko00196//Photosynthesis - antenna proteins	K08909;K08909	GO:0005575//cellular_component;GO:0005622//intracellular;GO:0005623//cell;GO:0005737//cytoplasm;GO:0009507//chloroplast;GO:0009521//photosystem;GO:0009522//photosystem I;GO:0009523//photosystem II;GO:0009526//plastid envelope;GO:0009532//plastid stroma;GO:0009534//chloroplast thylakoid;GO:0009535//chloroplast thylakoid membrane;GO:0009536//plastid;GO:0009570//chloroplast stroma;GO:0009579//thylak…	GO:0003674//molecular_function;GO:0005488//binding;GO:0016168//chlorophyll binding;GO:0031409//pigment binding;GO:0043167//ion binding;GO:0043168//anion binding;GO:0043169//cation binding;GO:0046872//metal ion binding;GO:0046906//tetrapyrrole binding;GO:0048037//cofactor binding;GO:0097159//organic cyclic compound binding;GO:1901363//heterocyclic compound binding	GO:0006091//generation of precursor metabolites and energy;GO:0006464//cellular protein modification process;GO:0006807//nitrogen compound metabolic process;GO:0008150//biological_process;GO:0008152//metabolic process;GO:0009314//response to radiation;GO:0009416//response to light stimulus;GO:0009628//response to abiotic stimulus;GO:0009765//photosynthesis, light harvesting;GO:0009768//photosynth…	--
TraesCS2D03G0160400	56	29	429	415	2.045	1.202	18.633	27.267	1.6235	22.95	3.82131	4.81943e-21	2.05949e-18	MLO1	-	-	-	-	GO:0016021//integral component of membrane	-	GO:0006952//defense response	--
TraesCS6D03G0654600	848	475	91	23	71.343	52.598	9.833	3.611	61.9705	6.722	-3.20462	5.37313e-21	2.28603e-18	CURT1A	-	-	-	-	-	-	-	--
TraesCS4B03G0133600	50	56	498	631	1.753	2.624	22.408	41.48	2.1885	31.944	3.86753	5.4561e-21	2.31119e-18	SCPL18	-	-	-	-	-	GO:0004185//serine-type carboxypeptidase activity	GO:0006508//proteolysis	--
TraesCS4A03G0521400	1290	873	224	84	36.9	32.873	8.237	4.521	34.8865	6.379	-2.45127	5.7285e-21	2.41603e-18	CIPK14	-	-	-	-	-	GO:0004672//protein kinase activity;GO:0005524//ATP binding;GO:0016709//oxidoreductase activity, acting on paired donors, with incorporation or reduction of molecular oxygen, NAD(P)H as one donor, and incorporation of one atom of oxygen	GO:0006468//protein phosphorylation;GO:0006744//ubiquinone biosynthetic process;GO:0007165//signal transduction	--
TraesCS1A03G0393100	941	927	5032	5946	35.406	45.857	243.52	420.465	40.6315	331.993	3.03048	5.93925e-21	2.49407e-18	--	-	-	-	-	-	-	-	--
TraesCS7D03G0241000LC	554	280	54	33	18.757	12.469	2.351	2.1	15.613	2.2255	-2.81055	8.11769e-21	3.39417e-18	--	-	-	-	-	-	GO:0008484//sulfuric ester hydrolase activity	-	--
TraesCS3A03G0706000	1087	849	219	185	54.696	56.189	14.209	17.487	55.4425	15.848	-1.80669	8.85206e-21	3.68535e-18	PXG4	Metabolism	Lipid metabolism	ko00073//Cutin, suberine and wax biosynthesis	K17991	-	GO:0005509//calcium ion binding	-	--
TraesCS4B03G0861900	471	266	45	33	53.347	39.625	6.555	7.024	46.486	6.7895	-2.77542	9.5533e-21	3.96029e-18	--	-	-	-	-	-	-	-	--
TraesCS1A03G0076000	1432	1123	261	88	99.224	102.286	23.247	11.456	100.755	17.3515	-2.53772	1.00834e-20	4.16227e-18	OEP16	-	-	-	-	-	GO:0050567//glutaminyl-tRNA synthase (glutamine-hydrolyzing) activity	GO:0006424//glutamyl-tRNA aminoacylation	--
TraesCS5D03G0511400	2604	2805	14525	13173	67.165	95.172	481.877	638.55	81.1685	560.213	2.78698	1.11368e-20	4.57759e-18	ALDH7B4	Metabolism;Metabolism;Metabolism;Metabolism;Metabolism;Metabolism;Metabolism;Metabolism;Metabolism;Metabolism;Metabolism;Metabolism;Metabolism;Metabolism	Global and overview maps;Global and overview maps;Carbohydrate metabolism;Amino acid metabolism;Carbohydrate metabolism;Lipid metabolism;Amino acid metabolism;Amino acid metabolism;Carbohydrate metabolism;Lipid metabolism;Amino acid metabolism;Amino acid metabolism;Metabolism of other amino acids;Amino acid metabolism	ko01100//Metabolic pathways;ko01110//Biosynthesis of secondary metabolites;ko00010//Glycolysis / Gluconeogenesis;ko00380//Tryptophan metabolism;ko00620//Pyruvate metabolism;ko00561//Glycerolipid metabolism;ko00330//Arginine and proline metabolism;ko00260//Glycine, serine and threonine metabolism;ko00053//Ascorbate and aldarate metabolism;ko00071//Fatty acid degradation;ko00310//Lysine degradation…	K14085;K14085;K14085;K14085;K14085;K14085;K14085;K14085;K14085;K14085;K14085;K14085;K14085;K14085	GO:0005575//cellular_component;GO:0005622//intracellular;GO:0005623//cell;GO:0005634//nucleus;GO:0005737//cytoplasm;GO:0005739//mitochondrion;GO:0005759//mitochondrial matrix;GO:0005829//cytosol;GO:0031974//membrane-enclosed lumen;GO:0043226//organelle;GO:0043227//membrane-bounded organelle;GO:0043229//intracellular organelle;GO:0043231//intracellular membrane-bounded organelle;GO:0043233//organe…	GO:0003674//molecular_function;GO:0003824//catalytic activity;GO:0003842//1-pyrroline-5-carboxylate dehydrogenase activity;GO:0004029//aldehyde dehydrogenase (NAD) activity;GO:0004043//L-aminoadipate-semialdehyde dehydrogenase activity;GO:0004350//glutamate-5-semialdehyde dehydrogenase activity;GO:0004491//methylmalonate-semialdehyde dehydrogenase (acylating) activity;GO:0004777//succinate-semial…	GO:0001101//response to acid chemical;GO:0001505//regulation of neurotransmitter levels;GO:0003008//system process;GO:0006081//cellular aldehyde metabolic process;GO:0006082//organic acid metabolic process;GO:0006520//cellular amino acid metabolic process;GO:0006527//arginine catabolic process;GO:0006553//lysine metabolic process;GO:0006554//lysine catabolic process;GO:0006561//proline biosynthet…	--
TraesCSU03G0009000LC	38	27	367	326	1.781	1.685	22.05	28.558	1.733	25.304	3.86802	1.29747e-20	5.28938e-18	CRK6	-	-	-	-	-	GO:0004672//protein kinase activity;GO:0005524//ATP binding	GO:0006468//protein phosphorylation	--
TraesCS1D03G0224900	817	694	141	132	28.967	32.351	6.444	8.805	30.659	7.6245	-2.0076	1.29775e-20	5.28938e-18	PER22	Metabolism;Metabolism;Metabolism	Global and overview maps;Global and overview maps;Biosynthesis of other secondary metabolites	ko01100//Metabolic pathways;ko01110//Biosynthesis of secondary metabolites;ko00940//Phenylpropanoid biosynthesis	K00430;K00430;K00430	-	GO:0004601//peroxidase activity;GO:0020037//heme binding	GO:0006979//response to oxidative stress;GO:0055114//oxidation-reduction process	--
TraesCS7B03G0876800	578	432	90	70	25.204	24.791	5.049	5.769	24.9975	5.409	-2.20835	1.43129e-20	5.80926e-18	XTH23	-	-	-	-	GO:0005618//cell wall;GO:0048046//apoplast	GO:0004553//hydrolase activity, hydrolyzing O-glycosyl compounds;GO:0016762//xyloglucan:xyloglucosyl transferase activity	GO:0005975//carbohydrate metabolic process;GO:0006073//cellular glucan metabolic process	--
TraesCS4D03G0669200	167	218	1420	1554	8.211	14.098	89.771	143.549	11.1545	116.66	3.38661	1.53946e-20	6.21567e-18	--	-	-	-	-	-	-	-	--
TraesCS7D03G0805700	376	410	2338	2620	13.821	19.781	110.397	180.727	16.801	145.562	3.11501	1.54424e-20	6.21567e-18	OMT1	-	-	-	-	-	GO:0003674//molecular_function;GO:0003824//catalytic activity;GO:0005488//binding;GO:0005515//protein binding;GO:0008168//methyltransferase activity;GO:0008171//O-methyltransferase activity;GO:0016740//transferase activity;GO:0016741//transferase activity, transferring one-carbon groups;GO:0046983//protein dimerization activity	GO:0000302//response to reactive oxygen species;GO:0001101//response to acid chemical;GO:0006950//response to stress;GO:0006979//response to oxidative stress;GO:0008150//biological_process;GO:0008152//metabolic process;GO:0009058//biosynthetic process;GO:0009611//response to wounding;GO:0009636//response to toxic substance;GO:0009719//response to endogenous stimulus;GO:0009723//response to ethyle…	--
TraesCS5A03G1101500	361	309	1779	2017	3.955	4.452	25.07	41.521	4.2035	33.2955	2.98566	1.86726e-20	7.4848e-18	ABCC4	Environmental Information Processing	Membrane transport	ko02010//ABC transporters	K05665	GO:0005575//cellular_component;GO:0005737//cytoplasm;GO:0005887//integral component of plasma membrane;GO:0009380//excinuclease repair complex;GO:0009898//cytoplasmic side of plasma membrane;GO:0016021//integral component of membrane;GO:0043190//ATP-binding cassette (ABC) transporter complex;GO:0055051//ATP-binding cassette (ABC) transporter complex, integrated substrate binding;GO:0055052//ATP-b…	GO:0000166//nucleotide binding;GO:0003677//DNA binding;GO:0003924//GTPase activity;GO:0005260//channel-conductance-controlling ATPase activity;GO:0005319//lipid transporter activity;GO:0005524//ATP binding;GO:0005525//GTP binding;GO:0008565//protein transporter activity;GO:0009381//excinuclease ABC activity;GO:0015220//choline transmembrane transporter activity;GO:0015221//lipopolysaccharide tran…	GO:0000910//cytokinesis;GO:0006289//nucleotide-excision repair;GO:0006810//transport;GO:0006817//phosphate ion transport;GO:0006824//cobalt ion transport;GO:0006855//drug transmembrane transport;GO:0006869//lipid transport;GO:0007601//visual perception;GO:0008150//biological_process;GO:0008272//sulfate transport;GO:0015675//nickel cation transport;GO:0015689//molybdate ion transport;GO:0015706//n…	--
TraesCS4D03G0168000	64706	48435	14208	5185	2653.53	2612.41	749.37	399.533	2632.97	574.452	-2.19643	2.05263e-20	8.19397e-18	LHCB5	Metabolism;Metabolism	Global and overview maps;Energy metabolism	ko01100//Metabolic pathways;ko00196//Photosynthesis - antenna proteins	K08916;K08916	GO:0005575//cellular_component;GO:0005622//intracellular;GO:0005623//cell;GO:0005737//cytoplasm;GO:0009503//thylakoid light-harvesting complex;GO:0009507//chloroplast;GO:0009517//PSII associated light-harvesting complex II;GO:0009521//photosystem;GO:0009522//photosystem I;GO:0009523//photosystem II;GO:0009526//plastid envelope;GO:0009532//plastid stroma;GO:0009534//chloroplast thylakoid;GO:000953…	GO:0003674//molecular_function;GO:0005488//binding;GO:0005515//protein binding;GO:0016168//chlorophyll binding;GO:0019904//protein domain specific binding;GO:0031409//pigment binding;GO:0043167//ion binding;GO:0043168//anion binding;GO:0043169//cation binding;GO:0046872//metal ion binding;GO:0046906//tetrapyrrole binding;GO:0048037//cofactor binding;GO:0097159//organic cyclic compound binding;GO:…	GO:0006091//generation of precursor metabolites and energy;GO:0006464//cellular protein modification process;GO:0006807//nitrogen compound metabolic process;GO:0008150//biological_process;GO:0008152//metabolic process;GO:0009314//response to radiation;GO:0009416//response to light stimulus;GO:0009628//response to abiotic stimulus;GO:0009637//response to blue light;GO:0009639//response to red or f…	--
TraesCS5D03G0989900	1305	1007	313	186	60.174	61.071	18.562	16.117	60.6225	17.3395	-1.80579	2.08517e-20	8.28975e-18	At2g30620	-	-	-	-	GO:0000786//nucleosome	GO:0003677//DNA binding	GO:0006334//nucleosome assembly	--
TraesCS5B03G0259500	2426	1568	536	259	133.175	113.19	37.839	26.668	123.183	32.2535	-1.93327	2.40604e-20	9.52634e-18	ACL1.1	-	-	-	-	GO:0005575//cellular_component;GO:0005622//intracellular;GO:0005623//cell;GO:0005737//cytoplasm;GO:0009507//chloroplast;GO:0009536//plastid;GO:0043226//organelle;GO:0043227//membrane-bounded organelle;GO:0043229//intracellular organelle;GO:0043231//intracellular membrane-bounded organelle;GO:0044424//intracellular part;GO:0044444//cytoplasmic part;GO:0044464//cell part	GO:0000036//ACP phosphopantetheine attachment site binding involved in fatty acid biosynthetic process;GO:0003674//molecular_function;GO:0005488//binding;GO:0019842//vitamin binding;GO:0031177//phosphopantetheine binding;GO:0033218//amide binding;GO:0036094//small molecule binding;GO:0043167//ion binding;GO:0043168//anion binding;GO:0048037//cofactor binding;GO:0072341//modified amino acid binding	GO:0006082//organic acid metabolic process;GO:0006629//lipid metabolic process;GO:0006631//fatty acid metabolic process;GO:0006633//fatty acid biosynthetic process;GO:0008150//biological_process;GO:0008152//metabolic process;GO:0008610//lipid biosynthetic process;GO:0009058//biosynthetic process;GO:0009987//cellular process;GO:0016053//organic acid biosynthetic process;GO:0019752//carboxylic acid…	--
TraesCS5A03G1054300	11	4	211	317	0.153	0.078	3.759	8.237	0.1155	5.998	5.69852	2.47836e-20	9.77282e-18	ABCG48	-	-	-	-	GO:0005575//cellular_component;GO:0005887//integral component of plasma membrane;GO:0009380//excinuclease repair complex;GO:0009898//cytoplasmic side of plasma membrane;GO:0016020//membrane;GO:0016021//integral component of membrane;GO:0043190//ATP-binding cassette (ABC) transporter complex;GO:0055051//ATP-binding cassette (ABC) transporter complex, integrated substrate binding;GO:0055052//ATP-bi…	GO:0003674//molecular_function;GO:0003723//RNA binding;GO:0003724//RNA helicase activity;GO:0003924//GTPase activity;GO:0004385//guanylate kinase activity;GO:0005319//lipid transporter activity;GO:0005524//ATP binding;GO:0005525//GTP binding;GO:0008565//protein transporter activity;GO:0009381//excinuclease ABC activity;GO:0015220//choline transmembrane transporter activity;GO:0015221//lipopolysac…	GO:0000910//cytokinesis;GO:0002949//tRNA threonylcarbamoyladenosine modification;GO:0006289//nucleotide-excision repair;GO:0006810//transport;GO:0006817//phosphate ion transport;GO:0006824//cobalt ion transport;GO:0006869//lipid transport;GO:0007601//visual perception;GO:0008150//biological_process;GO:0008272//sulfate transport;GO:0015675//nickel cation transport;GO:0015689//molybdate ion transpo…	--
TraesCS2D03G0667000	121	77	665	682	2.286	1.918	16.167	24.206	2.102	20.1865	3.26356	2.64883e-20	1.04027e-17	HAK1	-	-	-	-	GO:0016020//membrane	GO:0015079//potassium ion transmembrane transporter activity	GO:0006813//potassium ion transport;GO:0071805//potassium ion transmembrane transport	--
TraesCS5A03G0713100	3	2	241	435	0.065	0.057	6.756	17.814	0.061	12.285	7.65387	2.85588e-20	1.11706e-17	At1g54570	-	-	-	-	-	GO:0016747//transferase activity, transferring acyl groups other than amino-acyl groups;GO:0016787//hydrolase activity	GO:0009058//biosynthetic process	--
MSTRG.38157	12	9	235	245	0.391	0.368	9.84	14.98	0.3795	12.41	5.03126	3.29842e-20	1.28498e-17	CYP87A3	-	-	-	-	GO:0043231//intracellular membrane-bounded organelle	GO:0005488//binding	GO:0000041//transition metal ion transport;GO:0001101//response to acid chemical;GO:0009267//cellular response to starvation;GO:0015698//inorganic anion transport	--
TraesCS5B03G1220400	840	537	151	83	56.814	47.77	13.135	10.549	52.292	11.842	-2.14268	3.70812e-20	1.43881e-17	--	-	-	-	-	-	-	-	--
TraesCS1D03G0712600	140	181	1181	1349	3.711	6.288	40.182	67.071	4.9995	53.6265	3.42309	4.34342e-20	1.6786e-17	At3g08860	Metabolism;Metabolism;Metabolism;Metabolism;Metabolism;Metabolism	Global and overview maps;Global and overview maps;Amino acid metabolism;Amino acid metabolism;Amino acid metabolism;Amino acid metabolism	ko01100//Metabolic pathways;ko01110//Biosynthesis of secondary metabolites;ko00270//Cysteine and methionine metabolism;ko00260//Glycine, serine and threonine metabolism;ko00250//Alanine, aspartate and glutamate metabolism;ko00280//Valine, leucine and isoleucine degradation	K00827;K00827;K00827;K00827;K00827;K00827	GO:0005575//cellular_component;GO:0005622//intracellular;GO:0005623//cell;GO:0005737//cytoplasm;GO:0005739//mitochondrion;GO:0043226//organelle;GO:0043227//membrane-bounded organelle;GO:0043229//intracellular organelle;GO:0043231//intracellular membrane-bounded organelle;GO:0044424//intracellular part;GO:0044444//cytoplasmic part;GO:0044464//cell part	GO:0003674//molecular_function;GO:0003824//catalytic activity;GO:0003867//4-aminobutyrate transaminase activity;GO:0004015//adenosylmethionine-8-amino-7-oxononanoate transaminase activity;GO:0004587//ornithine-oxo-acid transaminase activity;GO:0005488//binding;GO:0005515//protein binding;GO:0008144//drug binding;GO:0008453//alanine-glyoxylate transaminase activity;GO:0008483//transaminase activit…	GO:0006779//porphyrin-containing compound biosynthetic process;GO:0007154//cell communication;GO:0008150//biological_process;GO:0008152//metabolic process;GO:0009102//biotin biosynthetic process;GO:0009447//putrescine catabolic process;GO:0009450//gamma-aminobutyric acid catabolic process;GO:0009605//response to external stimulus;GO:0009853//photorespiration;GO:0009987//cellular process;GO:000999…	--
TraesCS1D03G0825700	34	28	329	404	0.986	1.068	12.273	22.021	1.027	17.147	4.06145	6.93255e-20	2.66859e-17	CYP72A14	-	-	-	-	-	GO:0005506//iron ion binding;GO:0016705//oxidoreductase activity, acting on paired donors, with incorporation or reduction of molecular oxygen;GO:0020037//heme binding	GO:0055114//oxidation-reduction process	--
TraesCS2A03G0787900	23	29	320	454	1.233	2.044	22.059	45.729	1.6385	33.894	4.37058	7.04193e-20	2.69998e-17	--	-	-	-	-	GO:0009288//bacterial-type flagellum	GO:0003824//catalytic activity;GO:0004496//mevalonate kinase activity;GO:0034290//holin activity	GO:0016126//sterol biosynthetic process;GO:0019287//isopentenyl diphosphate biosynthetic process, mevalonate pathway;GO:0050920//regulation of chemotaxis	--
TraesCS1D03G0078800	88	92	689	578	2.679	3.684	26.992	33.096	3.1815	30.044	3.2393	7.20533e-20	2.75176e-17	PAL	Metabolism;Metabolism;Metabolism;Metabolism	Global and overview maps;Global and overview maps;Biosynthesis of other secondary metabolites;Amino acid metabolism	ko01100//Metabolic pathways;ko01110//Biosynthesis of secondary metabolites;ko00940//Phenylpropanoid biosynthesis;ko00360//Phenylalanine metabolism	K10775;K10775;K10775;K10775	-	GO:0004397//histidine ammonia-lyase activity;GO:0016841//ammonia-lyase activity;GO:0050368//tyrosine 2,3-aminomutase activity	GO:0006548//histidine catabolic process;GO:0009058//biosynthetic process;GO:0009698//phenylpropanoid metabolic process	--
TraesCS7D03G0307400	612	758	4209	4333	15.76	25.67	139.365	209.635	20.715	174.5	3.07448	7.33824e-20	2.79152e-17	PTC52	-	-	-	-	GO:0005575//cellular_component;GO:0005622//intracellular;GO:0005623//cell;GO:0005737//cytoplasm;GO:0009507//chloroplast;GO:0009526//plastid envelope;GO:0009528//plastid inner membrane;GO:0009536//plastid;GO:0009706//chloroplast inner membrane;GO:0009941//chloroplast envelope;GO:0016020//membrane;GO:0016021//integral component of membrane;GO:0019866//organelle inner membrane;GO:0031090//organelle …	GO:0003674//molecular_function;GO:0003824//catalytic activity;GO:0004497//monooxygenase activity;GO:0005488//binding;GO:0010277//chlorophyllide a oxygenase [overall] activity;GO:0016491//oxidoreductase activity;GO:0016701//oxidoreductase activity, acting on single donors with incorporation of molecular oxygen;GO:0016703//oxidoreductase activity, acting on single donors with incorporation of molec…	GO:0006810//transport;GO:0008104//protein localization;GO:0008150//biological_process;GO:0008152//metabolic process;GO:0015031//protein transport;GO:0015833//peptide transport;GO:0033036//macromolecule localization;GO:0042886//amide transport;GO:0045184//establishment of protein localization;GO:0051179//localization;GO:0051234//establishment of localization;GO:0055114//oxidation-reduction process…	--
TraesCS2B03G1307900	605	620	3360	4365	16.869	22.724	120.525	228.881	19.7965	174.703	3.14159	9.38079e-20	3.55459e-17	SAHH	Metabolism;Metabolism	Global and overview maps;Amino acid metabolism	ko01100//Metabolic pathways;ko00270//Cysteine and methionine metabolism	K01251;K01251	GO:0005737//cytoplasm	GO:0000166//nucleotide binding;GO:0003674//molecular_function;GO:0003824//catalytic activity;GO:0004013//adenosylhomocysteinase activity;GO:0004455//ketol-acid reductoisomerase activity;GO:0004488//methylenetetrahydrofolate dehydrogenase (NADP+) activity;GO:0005488//binding;GO:0008883//glutamyl-tRNA reductase activity;GO:0016491//oxidoreductase activity;GO:0016787//hydrolase activity;GO:0016801//…	GO:0006082//organic acid metabolic process;GO:0006139//nucleobase-containing compound metabolic process;GO:0006152//purine nucleoside catabolic process;GO:0006520//cellular amino acid metabolic process;GO:0006575//cellular modified amino acid metabolic process;GO:0006631//fatty acid metabolic process;GO:0006725//cellular aromatic compound metabolic process;GO:0006730//one-carbon metabolic process…	--
TraesCS1B03G1104400	487	444	2359	2657	16.698	20.044	104.113	171.337	18.371	137.725	2.90629	1.13095e-19	4.26875e-17	--	-	-	-	-	-	GO:0016491//oxidoreductase activity	GO:0055114//oxidation-reduction process	--
TraesCS5D03G1133200	23	27	302	436	0.777	1.2	13.118	27.672	0.9885	20.395	4.36683	1.66231e-19	6.25002e-17	AMT3-2	-	-	-	-	GO:0016020//membrane	GO:0008519//ammonium transmembrane transporter activity	GO:0015696//ammonium transport	--
TraesCS2A03G0782200	24	19	270	334	1.221	1.271	17.667	31.94	1.246	24.8035	4.31517	2.61301e-19	9.7866e-17	DMAS1-A	-	-	-	-	-	GO:0047834//D-threo-aldose 1-dehydrogenase activity	-	--
TraesCS7A03G0949600	159	137	886	744	4.866	5.541	34.972	42.93	5.2035	38.951	2.90411	2.93867e-19	1.09639e-16	trpB2	Metabolism;Metabolism;Metabolism;Metabolism;Metabolism	Global and overview maps;Global and overview maps;Global and overview maps;Amino acid metabolism;Amino acid metabolism	ko01100//Metabolic pathways;ko01110//Biosynthesis of secondary metabolites;ko01230//Biosynthesis of amino acids;ko00260//Glycine, serine and threonine metabolism;ko00400//Phenylalanine, tyrosine and tryptophan biosynthesis	K06001;K06001;K06001;K06001;K06001	-	GO:0003674//molecular_function;GO:0003824//catalytic activity;GO:0004122//cystathionine beta-synthase activity;GO:0004124//cysteine synthase activity;GO:0004795//threonine synthase activity;GO:0004834//tryptophan synthase activity;GO:0005488//binding;GO:0008144//drug binding;GO:0016829//lyase activity;GO:0016835//carbon-oxygen lyase activity;GO:0016836//hydro-lyase activity;GO:0019842//vitamin bi…	GO:0000162//tryptophan biosynthetic process;GO:0006082//organic acid metabolic process;GO:0006520//cellular amino acid metabolic process;GO:0006535//cysteine biosynthetic process from serine;GO:0006568//tryptophan metabolic process;GO:0006576//cellular biogenic amine metabolic process;GO:0006586//indolalkylamine metabolic process;GO:0006725//cellular aromatic compound metabolic process;GO:0006807…	--
MSTRG.32077	24	16	288	245	2.433	2.134	37.556	46.681	2.2835	42.1185	4.20514	2.97738e-19	1.10658e-16	--	-	-	-	-	-	-	-	--
TraesCS3D03G0155100	112	115	756	932	4.294	5.799	37.274	67.129	5.0465	52.2015	3.37074	3.53173e-19	1.3076e-16	NAM-B2	-	-	-	-	-	GO:0003677//DNA binding	GO:0006355//regulation of transcription, DNA-templated	NAC
TraesCS3A03G0313700	166	109	818	1096	5.048	4.343	31.953	62.545	4.6955	47.249	3.33093	3.81003e-19	1.40528e-16	CYP73A11	Metabolism;Metabolism;Metabolism;Metabolism;Metabolism;Metabolism	Global and overview maps;Global and overview maps;Biosynthesis of other secondary metabolites;Metabolism of cofactors and vitamins;Biosynthesis of other secondary metabolites;Biosynthesis of other secondary metabolites	ko01100//Metabolic pathways;ko01110//Biosynthesis of secondary metabolites;ko00940//Phenylpropanoid biosynthesis;ko00130//Ubiquinone and other terpenoid-quinone biosynthesis;ko00941//Flavonoid biosynthesis;ko00945//Stilbenoid, diarylheptanoid and gingerol biosynthesis	K00487;K00487;K00487;K00487;K00487;K00487	-	GO:0005506//iron ion binding;GO:0016705//oxidoreductase activity, acting on paired donors, with incorporation or reduction of molecular oxygen;GO:0020037//heme binding	GO:0055114//oxidation-reduction process	--
TraesCS2A03G0430100	19830	14153	4903	2013	961.774	902.805	305.842	183.472	932.289	244.657	-1.93002	3.93279e-19	1.44506e-16	LHBC	Metabolism;Metabolism	Global and overview maps;Energy metabolism	ko01100//Metabolic pathways;ko00196//Photosynthesis - antenna proteins	K08914;K08914	GO:0005575//cellular_component;GO:0005622//intracellular;GO:0005623//cell;GO:0005737//cytoplasm;GO:0009507//chloroplast;GO:0009521//photosystem;GO:0009522//photosystem I;GO:0009523//photosystem II;GO:0009526//plastid envelope;GO:0009532//plastid stroma;GO:0009534//chloroplast thylakoid;GO:0009535//chloroplast thylakoid membrane;GO:0009536//plastid;GO:0009570//chloroplast stroma;GO:0009579//thylak…	GO:0003674//molecular_function;GO:0005198//structural molecule activity;GO:0005488//binding;GO:0005515//protein binding;GO:0016168//chlorophyll binding;GO:0019904//protein domain specific binding;GO:0031409//pigment binding;GO:0043167//ion binding;GO:0043168//anion binding;GO:0043169//cation binding;GO:0046872//metal ion binding;GO:0046906//tetrapyrrole binding;GO:0048037//cofactor binding;GO:009…	GO:0001101//response to acid chemical;GO:0006091//generation of precursor metabolites and energy;GO:0006464//cellular protein modification process;GO:0006807//nitrogen compound metabolic process;GO:0006950//response to stress;GO:0008150//biological_process;GO:0008152//metabolic process;GO:0009314//response to radiation;GO:0009416//response to light stimulus;GO:0009628//response to abiotic stimulu…	--
TraesCS2D03G1156700	25	10	273	262	0.759	0.399	10.661	14.95	0.579	12.8055	4.46706	3.94974e-19	1.44581e-16	TDC1	Metabolism;Metabolism;Metabolism;Metabolism;Metabolism;Metabolism;Metabolism;Metabolism	Global and overview maps;Global and overview maps;Amino acid metabolism;Amino acid metabolism;Amino acid metabolism;Biosynthesis of other secondary metabolites;Biosynthesis of other secondary metabolites;Biosynthesis of other secondary metabolites	ko01100//Metabolic pathways;ko01110//Biosynthesis of secondary metabolites;ko00380//Tryptophan metabolism;ko00360//Phenylalanine metabolism;ko00350//Tyrosine metabolism;ko00950//Isoquinoline alkaloid biosynthesis;ko00965//Betalain biosynthesis;ko00901//Indole alkaloid biosynthesis	K01593;K01593;K01593;K01593;K01593;K01593;K01593;K01593	-	GO:0004351//glutamate decarboxylase activity;GO:0004837//tyrosine decarboxylase activity;GO:0016831//carboxy-lyase activity;GO:0030170//pyridoxal phosphate binding	GO:0006540//glutamate decarboxylation to succinate;GO:0006572//tyrosine catabolic process;GO:0015940//pantothenate biosynthetic process;GO:0019752//carboxylic acid metabolic process;GO:0051188//cofactor biosynthetic process	--
TraesCS4B03G0999100	22	12	230	484	0.399	0.286	5.361	16.482	0.3425	10.9215	4.99492	4.01106e-19	1.46274e-16	CLPB1	-	-	-	-	GO:0005876//spindle microtubule;GO:0009360//DNA polymerase III complex;GO:0009368//endopeptidase Clp complex;GO:0009376//HslUV protease complex;GO:0033104//type VI protein secretion system complex;GO:0042729//DASH complex	GO:0003723//RNA binding;GO:0003724//RNA helicase activity;GO:0003887//DNA-directed DNA polymerase activity;GO:0004176//ATP-dependent peptidase activity;GO:0004252//serine-type endopeptidase activity;GO:0005524//ATP binding;GO:0008134//transcription factor binding;GO:0016301//kinase activity;GO:0016818//hydrolase activity, acting on acid anhydrides, in phosphorus-containing anhydrides;GO:0016887//…	GO:0002949//tRNA threonylcarbamoyladenosine modification;GO:0006260//DNA replication;GO:0006355//regulation of transcription, DNA-templated;GO:0006457//protein folding;GO:0006508//proteolysis;GO:0008608//attachment of spindle microtubules to kinetochore;GO:0032297//negative regulation of DNA-dependent DNA replication initiation;GO:0033103//protein secretion by the type VI secretion system;GO:0043…	--
TraesCS4A03G0603000	59603	46506	13456	4547	2623.68	2692.25	761.636	376.091	2657.97	568.864	-2.22417	4.3728e-19	1.58869e-16	LHCB5	Metabolism;Metabolism	Global and overview maps;Energy metabolism	ko01100//Metabolic pathways;ko00196//Photosynthesis - antenna proteins	K08916;K08916	GO:0005575//cellular_component;GO:0005622//intracellular;GO:0005623//cell;GO:0005737//cytoplasm;GO:0009503//thylakoid light-harvesting complex;GO:0009507//chloroplast;GO:0009517//PSII associated light-harvesting complex II;GO:0009521//photosystem;GO:0009522//photosystem I;GO:0009523//photosystem II;GO:0009526//plastid envelope;GO:0009532//plastid stroma;GO:0009534//chloroplast thylakoid;GO:000953…	GO:0003674//molecular_function;GO:0005488//binding;GO:0005515//protein binding;GO:0016168//chlorophyll binding;GO:0019904//protein domain specific binding;GO:0031409//pigment binding;GO:0043167//ion binding;GO:0043168//anion binding;GO:0043169//cation binding;GO:0046872//metal ion binding;GO:0046906//tetrapyrrole binding;GO:0048037//cofactor binding;GO:0097159//organic cyclic compound binding;GO:…	GO:0006091//generation of precursor metabolites and energy;GO:0006464//cellular protein modification process;GO:0006807//nitrogen compound metabolic process;GO:0008150//biological_process;GO:0008152//metabolic process;GO:0009314//response to radiation;GO:0009416//response to light stimulus;GO:0009628//response to abiotic stimulus;GO:0009637//response to blue light;GO:0009639//response to red or f…	--
MSTRG.62581	1234	1097	299	134	49.088	57.395	15.297	10.017	53.2415	12.657	-2.07262	6.02378e-19	2.18034e-16	SAG39	-	-	-	-	-	GO:0003824//catalytic activity	-	--
TraesCS2A03G0412600	501	340	76	35	22.429	19.984	4.346	2.91	21.2065	3.628	-2.54726	6.09526e-19	2.19801e-16	OsI_26546	-	-	-	-	GO:0005737//cytoplasm	GO:0008135//translation factor activity, RNA binding	GO:0006412//translation	--
TraesCS1D03G0064400	96	94	688	538	3.019	3.888	27.829	31.797	3.4535	29.813	3.10981	6.29485e-19	2.26158e-16	DTX19	-	-	-	-	GO:0016020//membrane	GO:0003674//molecular_function;GO:0015238//drug transmembrane transporter activity;GO:0015297//antiporter activity;GO:0042910//xenobiotic transporter activity	GO:0006855//drug transmembrane transport;GO:0030436//asexual sporulation;GO:0042493//response to drug;GO:0055085//transmembrane transport	--
TraesCS1A03G0138300	23	37	361	445	1.33	2.815	26.852	48.379	2.0725	37.6155	4.18188	6.48819e-19	2.32244e-16	URH2	Metabolism;Metabolism;Metabolism	Global and overview maps;Nucleotide metabolism;Metabolism of cofactors and vitamins	ko01100//Metabolic pathways;ko00240//Pyrimidine metabolism;ko00760//Nicotinate and nicotinamide metabolism	K01240;K01240;K01240	-	-	-	--
TraesCS3A03G0656700	4498	3111	882	277	138.06	125.59	34.819	15.996	131.825	25.4075	-2.3753	6.79591e-19	2.42364e-16	PTAC16	-	-	-	-	GO:0000229//cytoplasmic chromosome;GO:0005575//cellular_component;GO:0005622//intracellular;GO:0005623//cell;GO:0005694//chromosome;GO:0005737//cytoplasm;GO:0009295//nucleoid;GO:0009507//chloroplast;GO:0009508//plastid chromosome;GO:0009526//plastid envelope;GO:0009532//plastid stroma;GO:0009534//chloroplast thylakoid;GO:0009535//chloroplast thylakoid membrane;GO:0009536//plastid;GO:0009570//chlo…	GO:0003824//catalytic activity;GO:0016757//transferase activity, transferring glycosyl groups	GO:0005975//carbohydrate metabolic process;GO:0007623//circadian rhythm;GO:0008150//biological_process;GO:0048511//rhythmic process	--
TraesCS6D03G0340100	36106	28058	8866	3317	1749.67	1788.3	552.54	302.037	1768.98	427.288	-2.04964	7.52991e-19	2.67557e-16	CAB8	Metabolism;Metabolism	Global and overview maps;Energy metabolism	ko01100//Metabolic pathways;ko00196//Photosynthesis - antenna proteins	K08909;K08909	GO:0005575//cellular_component;GO:0005622//intracellular;GO:0005623//cell;GO:0005737//cytoplasm;GO:0009507//chloroplast;GO:0009521//photosystem;GO:0009522//photosystem I;GO:0009523//photosystem II;GO:0009526//plastid envelope;GO:0009532//plastid stroma;GO:0009534//chloroplast thylakoid;GO:0009535//chloroplast thylakoid membrane;GO:0009536//plastid;GO:0009570//chloroplast stroma;GO:0009579//thylak…	GO:0003674//molecular_function;GO:0005488//binding;GO:0016168//chlorophyll binding;GO:0031409//pigment binding;GO:0043167//ion binding;GO:0043168//anion binding;GO:0043169//cation binding;GO:0046872//metal ion binding;GO:0046906//tetrapyrrole binding;GO:0048037//cofactor binding;GO:0097159//organic cyclic compound binding;GO:1901363//heterocyclic compound binding	GO:0006091//generation of precursor metabolites and energy;GO:0006464//cellular protein modification process;GO:0006807//nitrogen compound metabolic process;GO:0008150//biological_process;GO:0008152//metabolic process;GO:0009314//response to radiation;GO:0009416//response to light stimulus;GO:0009628//response to abiotic stimulus;GO:0009765//photosynthesis, light harvesting;GO:0009768//photosynth…	--
TraesCS4A03G0157500	9	4	175	342	0.236	0.145	6.212	17.689	0.1905	11.9505	5.97114	7.87162e-19	2.78678e-16	CYP90B2	Metabolism;Metabolism;Metabolism	Global and overview maps;Global and overview maps;Metabolism of terpenoids and polyketides	ko01100//Metabolic pathways;ko01110//Biosynthesis of secondary metabolites;ko00905//Brassinosteroid biosynthesis	K09587;K09587;K09587	GO:0005575//cellular_component;GO:0005622//intracellular;GO:0005623//cell;GO:0005737//cytoplasm;GO:0005783//endoplasmic reticulum;GO:0005886//plasma membrane;GO:0012505//endomembrane system;GO:0016020//membrane;GO:0016021//integral component of membrane;GO:0031224//intrinsic component of membrane;GO:0043226//organelle;GO:0043227//membrane-bounded organelle;GO:0043229//intracellular organelle;GO:0…	GO:0003674//molecular_function;GO:0003824//catalytic activity;GO:0004497//monooxygenase activity;GO:0005488//binding;GO:0005506//iron ion binding;GO:0008395//steroid hydroxylase activity;GO:0010012//steroid 22-alpha hydroxylase activity;GO:0016491//oxidoreductase activity;GO:0016705//oxidoreductase activity, acting on paired donors, with incorporation or reduction of molecular oxygen;GO:0020037//…	GO:0000902//cell morphogenesis;GO:0001101//response to acid chemical;GO:0006629//lipid metabolic process;GO:0006694//steroid biosynthetic process;GO:0007154//cell communication;GO:0007165//signal transduction;GO:0007275//multicellular organism development;GO:0008150//biological_process;GO:0008152//metabolic process;GO:0008202//steroid metabolic process;GO:0008610//lipid biosynthetic process;GO:00…	--
TraesCS4B03G0030000	176	161	973	1230	3.932	4.72	27.947	51.581	4.326	39.764	3.20036	8.16784e-19	2.88114e-16	Os12g0623900	Metabolism;Metabolism;Metabolism;Metabolism;Metabolism	Global and overview maps;Global and overview maps;Global and overview maps;Amino acid metabolism;Metabolism of other amino acids	ko01100//Metabolic pathways;ko01110//Biosynthesis of secondary metabolites;ko01230//Biosynthesis of amino acids;ko00270//Cysteine and methionine metabolism;ko00450//Selenocompound metabolism	K00549;K00549;K00549;K00549;K00549	-	GO:0003871//5-methyltetrahydropteroyltriglutamate-homocysteine S-methyltransferase activity;GO:0004357//glutamate-cysteine ligase activity;GO:0008270//zinc ion binding	GO:0006750//glutathione biosynthetic process;GO:0008652//cellular amino acid biosynthetic process;GO:0009086//methionine biosynthetic process	--
TraesCS7A03G0783600	101	56	563	501	2.51	1.83	17.994	23.396	2.17	20.695	3.25352	8.21084e-19	2.88581e-16	GULLO2	Metabolism;Metabolism	Global and overview maps;Carbohydrate metabolism	ko01100//Metabolic pathways;ko00053//Ascorbate and aldarate metabolism	K00103;K00103	GO:0016020//membrane	GO:0003885//D-arabinono-1,4-lactone oxidase activity;GO:0008891//glycolate oxidase activity;GO:0016491//oxidoreductase activity;GO:0050660//flavin adenine dinucleotide binding	GO:0005975//carbohydrate metabolic process;GO:0055114//oxidation-reduction process	--
TraesCS2B03G1133800	18	15	264	226	0.58	0.635	10.932	13.674	0.6075	12.303	4.33998	8.41241e-19	2.94598e-16	CYP99A2	Metabolism;Metabolism	Global and overview maps;Metabolism of terpenoids and polyketides	ko01110//Biosynthesis of secondary metabolites;ko00904//Diterpenoid biosynthesis	K16085;K16085	-	GO:0005506//iron ion binding;GO:0016705//oxidoreductase activity, acting on paired donors, with incorporation or reduction of molecular oxygen;GO:0020037//heme binding	GO:0055114//oxidation-reduction process	--
TraesCSU03G0111800	240	180	1115	893	9.461	9.343	56.46	66.065	9.402	61.2625	2.70396	8.48383e-19	2.96031e-16	yqjG	-	-	-	-	-	GO:0005515//protein binding	GO:0006749//glutathione metabolic process	--
TraesCS2A03G1180300	61	70	519	650	2.636	3.978	28.844	52.783	3.307	40.8135	3.62545	9.92846e-19	3.45197e-16	ENDO4	-	-	-	-	-	GO:0003676//nucleic acid binding;GO:0004519//endonuclease activity	GO:0006308//DNA catabolic process	--
TraesCS1A03G0846100	138	120	765	851	2.565	3.006	18.299	29.75	2.7855	24.0245	3.1085	1.04494e-18	3.62011e-16	ABCA7	-	-	-	-	GO:0005575//cellular_component;GO:0005887//integral component of plasma membrane;GO:0009898//cytoplasmic side of plasma membrane;GO:0016021//integral component of membrane;GO:0043190//ATP-binding cassette (ABC) transporter complex;GO:0055051//ATP-binding cassette (ABC) transporter complex, integrated substrate binding;GO:0055052//ATP-binding cassette (ABC) transporter complex, substrate-binding s…	GO:0005260//channel-conductance-controlling ATPase activity;GO:0005319//lipid transporter activity;GO:0005524//ATP binding;GO:0008565//protein transporter activity;GO:0015220//choline transmembrane transporter activity;GO:0015221//lipopolysaccharide transmembrane transporter activity;GO:0015412//molybdate transmembrane-transporting ATPase activity;GO:0015413//nickel-transporting ATPase activity;G…	GO:0000910//cytokinesis;GO:0006810//transport;GO:0006817//phosphate ion transport;GO:0006824//cobalt ion transport;GO:0006855//drug transmembrane transport;GO:0006869//lipid transport;GO:0007601//visual perception;GO:0008150//biological_process;GO:0008272//sulfate transport;GO:0015675//nickel cation transport;GO:0015689//molybdate ion transport;GO:0015706//nitrate transport;GO:0015716//organic ph…	--
TraesCS7B03G0690300	1354	1452	6977	6957	36.726	48.415	246.845	361.906	42.5705	304.375	2.83793	1.20104e-18	4.1461e-16	PPH	-	-	-	-	-	GO:0003674//molecular_function;GO:0003824//catalytic activity;GO:0016787//hydrolase activity;GO:0047570//3-oxoadipate enol-lactonase activity;GO:0070205//2-succinyl-6-hydroxy-2,4-cyclohexadiene-1-carboxylate synthase activity	GO:0006629//lipid metabolic process;GO:0009102//biotin biosynthetic process;GO:0009234//menaquinone biosynthetic process;GO:0015979//photosynthesis;GO:0042952//beta-ketoadipate pathway	--
TraesCS3D03G0963200	243	193	1134	948	6.84	7.145	41.039	50.144	6.9925	45.5915	2.70488	1.27959e-18	4.4016e-16	At3g47570	-	-	-	-	-	GO:0004672//protein kinase activity;GO:0005515//protein binding;GO:0005524//ATP binding	GO:0006468//protein phosphorylation	--
TraesCS4A03G0737400	58	41	415	364	1.44	1.339	13.253	16.977	1.3895	15.115	3.44334	1.58697e-18	5.43967e-16	--	-	-	-	-	GO:0016021//integral component of membrane	GO:0022857//transmembrane transporter activity	GO:0055085//transmembrane transport	--
TraesCS1D03G0614900	1299	801	245	95	26.047	21.129	6.306	3.579	23.588	4.9425	-2.25474	1.61479e-18	5.51554e-16	CLA1	Metabolism;Metabolism;Metabolism;Metabolism	Global and overview maps;Global and overview maps;Metabolism of terpenoids and polyketides;Metabolism of cofactors and vitamins	ko01100//Metabolic pathways;ko01110//Biosynthesis of secondary metabolites;ko00900//Terpenoid backbone biosynthesis;ko00730//Thiamine metabolism	K01662;K01662;K01662;K01662	GO:0005575//cellular_component;GO:0005622//intracellular;GO:0005623//cell;GO:0005737//cytoplasm;GO:0009507//chloroplast;GO:0009532//plastid stroma;GO:0009536//plastid;GO:0009570//chloroplast stroma;GO:0043226//organelle;GO:0043227//membrane-bounded organelle;GO:0043229//intracellular organelle;GO:0043231//intracellular membrane-bounded organelle;GO:0044422//organelle part;GO:0044424//intracellula…	GO:0003674//molecular_function;GO:0003824//catalytic activity;GO:0004739//pyruvate dehydrogenase (acetyl-transferring) activity;GO:0004802//transketolase activity;GO:0005488//binding;GO:0008661//1-deoxy-D-xylulose-5-phosphate synthase activity;GO:0016624//oxidoreductase activity, acting on the aldehyde or oxo group of donors, disulfide as acceptor;GO:0016740//transferase activity;GO:0016744//tran…	GO:0006086//acetyl-CoA biosynthetic process from pyruvate;GO:0006098//pentose-phosphate shunt;GO:0006629//lipid metabolic process;GO:0006720//isoprenoid metabolic process;GO:0006721//terpenoid metabolic process;GO:0006725//cellular aromatic compound metabolic process;GO:0006766//vitamin metabolic process;GO:0006767//water-soluble vitamin metabolic process;GO:0006772//thiamine metabolic process;GO…	--
TraesCS2B03G1133600	34	8	320	306	0.684	0.212	8.278	11.566	0.448	9.922	4.46906	1.67691e-18	5.70761e-16	CPS4	Metabolism;Metabolism	Global and overview maps;Metabolism of terpenoids and polyketides	ko01110//Biosynthesis of secondary metabolites;ko00904//Diterpenoid biosynthesis	K14043;K14043	-	GO:0000287//magnesium ion binding;GO:0003674//molecular_function;GO:0003824//catalytic activity;GO:0005488//binding;GO:0009905//ent-copalyl diphosphate synthase activity;GO:0010333//terpene synthase activity;GO:0016829//lyase activity;GO:0016835//carbon-oxygen lyase activity;GO:0016838//carbon-oxygen lyase activity, acting on phosphates;GO:0016853//isomerase activity;GO:0016872//intramolecular ly…	GO:0006082//organic acid metabolic process;GO:0006629//lipid metabolic process;GO:0006720//isoprenoid metabolic process;GO:0006721//terpenoid metabolic process;GO:0006950//response to stress;GO:0006952//defense response;GO:0008150//biological_process;GO:0008152//metabolic process;GO:0009685//gibberellin metabolic process;GO:0009987//cellular process;GO:0010817//regulation of hormone levels;GO:001…	--
TraesCS2D03G1011600	75	34	440	662	0.832	0.496	6.235	13.677	0.664	9.956	3.90631	1.73653e-18	5.88986e-16	ABCC9	-	-	-	-	GO:0005575//cellular_component;GO:0005737//cytoplasm;GO:0005887//integral component of plasma membrane;GO:0009380//excinuclease repair complex;GO:0009898//cytoplasmic side of plasma membrane;GO:0016021//integral component of membrane;GO:0043190//ATP-binding cassette (ABC) transporter complex;GO:0055051//ATP-binding cassette (ABC) transporter complex, integrated substrate binding;GO:0055052//ATP-b…	GO:0000166//nucleotide binding;GO:0003677//DNA binding;GO:0003924//GTPase activity;GO:0005260//channel-conductance-controlling ATPase activity;GO:0005319//lipid transporter activity;GO:0005524//ATP binding;GO:0005525//GTP binding;GO:0008565//protein transporter activity;GO:0009381//excinuclease ABC activity;GO:0015220//choline transmembrane transporter activity;GO:0015221//lipopolysaccharide tran…	GO:0000910//cytokinesis;GO:0006289//nucleotide-excision repair;GO:0006400//tRNA modification;GO:0006810//transport;GO:0006817//phosphate ion transport;GO:0006824//cobalt ion transport;GO:0006855//drug transmembrane transport;GO:0006869//lipid transport;GO:0007601//visual perception;GO:0008150//biological_process;GO:0008272//sulfate transport;GO:0015675//nickel cation transport;GO:0015689//molybda…	--
TraesCS6D03G0175200	224	152	10	4	11.867	10.587	0.682	0.399	11.227	0.5405	-4.37653	1.98136e-18	6.69684e-16	WHAB1.6	Metabolism;Metabolism	Global and overview maps;Energy metabolism	ko01100//Metabolic pathways;ko00196//Photosynthesis - antenna proteins	K08912;K08912	-	GO:0003824//catalytic activity;GO:0046537//2,3-bisphosphoglycerate-independent phosphoglycerate mutase activity	-	--
TraesCS6D03G0293400	11	12	215	247	0.375	0.526	9.429	15.791	0.4505	12.61	4.8069	2.0053e-18	6.75425e-16	FLOT1	-	-	-	-	-	-	-	--
TraesCS5D03G1102900	2545	1620	648	469	132.313	110.773	43.328	45.82	121.543	44.574	-1.44719	2.08482e-18	6.99777e-16	--	-	-	-	-	-	-	-	--
TraesCS7D03G0108600	12	25	289	363	0.238	0.645	7.229	13.271	0.4415	10.25	4.53707	2.14575e-18	7.17747e-16	OPT7	-	-	-	-	-	GO:0015198//oligopeptide transporter activity	GO:0055085//transmembrane transport	--
TraesCS1A03G0465800	5973	4003	1239	405	159.182	146.414	42.589	20.134	152.798	31.3615	-2.28456	2.99941e-18	9.99846e-16	HEMA1	Metabolism;Metabolism;Metabolism	Global and overview maps;Global and overview maps;Metabolism of cofactors and vitamins	ko01100//Metabolic pathways;ko01110//Biosynthesis of secondary metabolites;ko00860//Porphyrin metabolism	K02492;K02492;K02492	GO:0005575//cellular_component;GO:0005622//intracellular;GO:0005623//cell;GO:0005737//cytoplasm;GO:0009507//chloroplast;GO:0009536//plastid;GO:0043226//organelle;GO:0043227//membrane-bounded organelle;GO:0043229//intracellular organelle;GO:0043231//intracellular membrane-bounded organelle;GO:0044424//intracellular part;GO:0044444//cytoplasmic part;GO:0044464//cell part	GO:0000166//nucleotide binding;GO:0003674//molecular_function;GO:0003824//catalytic activity;GO:0004764//shikimate 3-dehydrogenase (NADP+) activity;GO:0005488//binding;GO:0008641//small protein activating enzyme activity;GO:0008839//4-hydroxy-tetrahydrodipicolinate reductase;GO:0008883//glutamyl-tRNA reductase activity;GO:0016491//oxidoreductase activity;GO:0016616//oxidoreductase activity, actin…	GO:0006725//cellular aromatic compound metabolic process;GO:0006778//porphyrin-containing compound metabolic process;GO:0006779//porphyrin-containing compound biosynthetic process;GO:0006782//protoporphyrinogen IX biosynthetic process;GO:0006783//heme biosynthetic process;GO:0006807//nitrogen compound metabolic process;GO:0006813//potassium ion transport;GO:0008150//biological_process;GO:0008152/…	--
TraesCS1D03G0601300	21	8	256	218	1.292	0.617	20.223	25.2	0.9545	22.7115	4.57253	3.0845e-18	1.02469e-15	Os07g0442900	-	-	-	-	GO:0005575//cellular_component;GO:0005623//cell;GO:0005886//plasma membrane;GO:0016020//membrane;GO:0016021//integral component of membrane;GO:0031224//intrinsic component of membrane;GO:0044425//membrane part;GO:0044464//cell part;GO:0071944//cell periphery	GO:0003674//molecular_function;GO:0005488//binding;GO:0048037//cofactor binding;GO:0051536//iron-sulfur cluster binding;GO:0051540//metal cluster binding	-	--
TraesCS3B03G0517900	908	535	130	36	31.45	24.344	5.768	2.342	27.897	4.055	-2.78234	3.20018e-18	1.05949e-15	YPQ1	-	-	-	-	-	-	-	--
TraesCS5B03G1297500	1935	1221	443	206	73.843	61.35	21.779	14.801	67.5965	18.29	-1.88589	3.33983e-18	1.10196e-15	rpsA	-	-	-	-	GO:0000314//organellar small ribosomal subunit;GO:0022627//cytosolic small ribosomal subunit	GO:0003676//nucleic acid binding;GO:0003735//structural constituent of ribosome;GO:0004654//polyribonucleotide nucleotidyltransferase activity;GO:0008997//ribonuclease R activity	GO:0006401//RNA catabolic process;GO:0006402//mRNA catabolic process;GO:0006412//translation	--
MSTRG.6328	20	13	235	259	0.814	0.696	12.306	19.817	0.755	16.0615	4.41099	3.45798e-18	1.13708e-15	--	-	-	-	-	-	-	-	--
TraesCS2D03G0863100	36	38	342	454	0.686	0.961	8.448	16.389	0.8235	12.4185	3.91458	3.60258e-18	1.18062e-15	PAL	Metabolism;Metabolism;Metabolism;Metabolism	Global and overview maps;Global and overview maps;Biosynthesis of other secondary metabolites;Amino acid metabolism	ko01100//Metabolic pathways;ko01110//Biosynthesis of secondary metabolites;ko00940//Phenylpropanoid biosynthesis;ko00360//Phenylalanine metabolism	K10775;K10775;K10775;K10775	GO:0005575//cellular_component;GO:0005622//intracellular;GO:0005623//cell;GO:0005737//cytoplasm;GO:0044424//intracellular part;GO:0044464//cell part	GO:0003674//molecular_function;GO:0003824//catalytic activity;GO:0004397//histidine ammonia-lyase activity;GO:0016829//lyase activity;GO:0016840//carbon-nitrogen lyase activity;GO:0016841//ammonia-lyase activity;GO:0045548//phenylalanine ammonia-lyase activity;GO:0050368//tyrosine 2,3-aminomutase activity	GO:0006082//organic acid metabolic process;GO:0006520//cellular amino acid metabolic process;GO:0006548//histidine catabolic process;GO:0006558//L-phenylalanine metabolic process;GO:0006559//L-phenylalanine catabolic process;GO:0006725//cellular aromatic compound metabolic process;GO:0006807//nitrogen compound metabolic process;GO:0008150//biological_process;GO:0008152//metabolic process;GO:00090…	--
TraesCS6D03G0516100	179	181	1034	927	3.314	4.414	24.653	32.293	3.864	28.473	2.88143	4.2151e-18	1.37671e-15	Os11g0582300	-	-	-	-	GO:0005575//cellular_component;GO:0005622//intracellular;GO:0005623//cell;GO:0005737//cytoplasm;GO:0005783//endoplasmic reticulum;GO:0005789//endoplasmic reticulum membrane;GO:0005887//integral component of plasma membrane;GO:0009898//cytoplasmic side of plasma membrane;GO:0012505//endomembrane system;GO:0016020//membrane;GO:0016021//integral component of membrane;GO:0031224//intrinsic component …	GO:0000166//nucleotide binding;GO:0001882//nucleoside binding;GO:0001883//purine nucleoside binding;GO:0003674//molecular_function;GO:0003824//catalytic activity;GO:0003924//GTPase activity;GO:0005488//binding;GO:0005524//ATP binding;GO:0005525//GTP binding;GO:0016787//hydrolase activity;GO:0017076//purine nucleotide binding;GO:0019001//guanyl nucleotide binding;GO:0032549//ribonucleoside binding…	GO:0006810//transport;GO:0006824//cobalt ion transport;GO:0033228//cysteine export	--
TraesCS2A03G0788200	8	8	179	280	0.459	0.604	13.249	30.282	0.5315	21.7655	5.35583	4.24413e-18	1.38154e-15	--	-	-	-	-	-	GO:0005515//protein binding	GO:0009405//pathogenesis;GO:0044780//bacterial-type flagellum assembly	--
TraesCS4A03G0902500	69	109	780	730	2.574	5.349	37.428	51.182	3.9615	44.305	3.48335	5.11116e-18	1.6582e-15	ephA	-	-	-	-	-	GO:0003674//molecular_function;GO:0003824//catalytic activity;GO:0008236//serine-type peptidase activity;GO:0016788//hydrolase activity, acting on ester bonds;GO:0047570//3-oxoadipate enol-lactonase activity;GO:0070205//2-succinyl-6-hydroxy-2,4-cyclohexadiene-1-carboxylate synthase activity	GO:0006112//energy reserve metabolic process;GO:0006508//proteolysis;GO:0009102//biotin biosynthetic process;GO:0009234//menaquinone biosynthetic process;GO:0015979//photosynthesis;GO:0030163//protein catabolic process;GO:0042952//beta-ketoadipate pathway	--
TraesCS7A03G1036300	347	162	23	14	14.566	8.934	1.225	1.072	11.75	1.1485	-3.35484	5.86942e-18	1.89786e-15	XTH25	-	-	-	-	GO:0005618//cell wall;GO:0048046//apoplast	GO:0004553//hydrolase activity, hydrolyzing O-glycosyl compounds;GO:0016762//xyloglucan:xyloglucosyl transferase activity	GO:0005975//carbohydrate metabolic process;GO:0006073//cellular glucan metabolic process	--
TraesCS4B03G0679500	596	348	92	43	12.207	9.375	2.515	1.655	10.791	2.085	-2.37171	6.15308e-18	1.98297e-15	BXL7	-	-	-	-	-	GO:0004553//hydrolase activity, hydrolyzing O-glycosyl compounds	GO:0005975//carbohydrate metabolic process	--
TraesCS1D03G0454400	313	262	1371	1281	7.844	8.617	44.148	60.262	8.2305	52.205	2.66514	6.54417e-18	2.10202e-15	CYP84A1	Metabolism;Metabolism;Metabolism	Global and overview maps;Global and overview maps;Biosynthesis of other secondary metabolites	ko01100//Metabolic pathways;ko01110//Biosynthesis of secondary metabolites;ko00940//Phenylpropanoid biosynthesis	K09755;K09755;K09755	-	GO:0005506//iron ion binding;GO:0016705//oxidoreductase activity, acting on paired donors, with incorporation or reduction of molecular oxygen;GO:0020037//heme binding	GO:0055114//oxidation-reduction process	--
TraesCS7A03G0566700	63	37	390	441	1.21	0.935	9.633	15.938	1.0725	12.7855	3.57546	6.71512e-18	2.14981e-15	CM-LOX2	Metabolism;Metabolism;Metabolism;Metabolism	Global and overview maps;Global and overview maps;Lipid metabolism;Lipid metabolism	ko01100//Metabolic pathways;ko01110//Biosynthesis of secondary metabolites;ko00592//alpha-Linolenic acid metabolism;ko00591//Linoleic acid metabolism	K00454;K00454;K00454;K00454	-	GO:0005515//protein binding;GO:0016702//oxidoreductase activity, acting on single donors with incorporation of molecular oxygen, incorporation of two atoms of oxygen;GO:0046872//metal ion binding	GO:0055114//oxidation-reduction process	--
TraesCS5A03G0242500	2506	1682	631	294	128.763	113.654	41.693	28.431	121.209	35.062	-1.78951	6.88529e-18	2.19704e-15	ACL1.1	-	-	-	-	-	GO:0000036//ACP phosphopantetheine attachment site binding involved in fatty acid biosynthetic process	GO:0006633//fatty acid biosynthetic process	--
TraesCS7D03G0225100	111	98	635	743	4.083	4.403	29.397	50.248	4.243	39.8225	3.23043	7.25297e-18	2.30678e-15	CRK6	-	-	-	-	-	GO:0004672//protein kinase activity;GO:0004674//protein serine/threonine kinase activity;GO:0005524//ATP binding	GO:0006468//protein phosphorylation	--
TraesCS1B03G1192600	205	239	1321	1829	12.931	19.828	107.163	216.737	16.3795	161.95	3.30559	7.90609e-18	2.50628e-15	--	-	-	-	-	-	-	-	--
MSTRG.8869	34	39	353	359	1.05	1.591	14.072	20.929	1.3205	17.5005	3.72824	8.17008e-18	2.58153e-15	SD113	-	-	-	-	-	-	-	--
TraesCS7A03G0921600	509	532	104	44	13.464	18.532	3.54	2.188	15.998	2.864	-2.48179	8.57972e-18	2.70217e-15	PAO6	Metabolism;Metabolism;Metabolism	Global and overview maps;Amino acid metabolism;Metabolism of other amino acids	ko01100//Metabolic pathways;ko00330//Arginine and proline metabolism;ko00410//beta-Alanine metabolism	K13366;K13366;K13366	-	GO:0016491//oxidoreductase activity	GO:0055114//oxidation-reduction process	--
TraesCS2B03G0384000LC	304	340	44	32	25.975	38.161	4.83	5.069	32.068	4.9495	-2.69578	1.00585e-17	3.15765e-15	-	-	-	-	-	-	-	-	-
TraesCS5B03G0815100	14895	11901	4081	1634	716.327	752.757	252.394	147.655	734.542	200.024	-1.87667	1.08068e-17	3.38162e-15	OsI_012078	Metabolism;Metabolism	Global and overview maps;Energy metabolism	ko01100//Metabolic pathways;ko00196//Photosynthesis - antenna proteins	K08913;K08913	GO:0005575//cellular_component;GO:0005622//intracellular;GO:0005623//cell;GO:0005737//cytoplasm;GO:0009507//chloroplast;GO:0009521//photosystem;GO:0009522//photosystem I;GO:0009523//photosystem II;GO:0009526//plastid envelope;GO:0009532//plastid stroma;GO:0009534//chloroplast thylakoid;GO:0009535//chloroplast thylakoid membrane;GO:0009536//plastid;GO:0009570//chloroplast stroma;GO:0009579//thylak…	GO:0003674//molecular_function;GO:0005488//binding;GO:0016168//chlorophyll binding;GO:0031409//pigment binding;GO:0043167//ion binding;GO:0043168//anion binding;GO:0043169//cation binding;GO:0046872//metal ion binding;GO:0046906//tetrapyrrole binding;GO:0048037//cofactor binding;GO:0097159//organic cyclic compound binding;GO:1901363//heterocyclic compound binding	GO:0006091//generation of precursor metabolites and energy;GO:0006464//cellular protein modification process;GO:0006807//nitrogen compound metabolic process;GO:0008150//biological_process;GO:0008152//metabolic process;GO:0009314//response to radiation;GO:0009416//response to light stimulus;GO:0009628//response to abiotic stimulus;GO:0009765//photosynthesis, light harvesting;GO:0009768//photosynth…	--
TraesCS5D03G0435100	10237	6200	2344	915	184.283	146.83	54.259	30.946	165.556	42.6025	-1.95831	1.27471e-17	3.97593e-15	AKHSDH2	Metabolism;Metabolism;Metabolism;Metabolism;Metabolism;Metabolism;Metabolism	Global and overview maps;Global and overview maps;Global and overview maps;Amino acid metabolism;Amino acid metabolism;Amino acid metabolism;Biosynthesis of other secondary metabolites	ko01100//Metabolic pathways;ko01110//Biosynthesis of secondary metabolites;ko01230//Biosynthesis of amino acids;ko00270//Cysteine and methionine metabolism;ko00260//Glycine, serine and threonine metabolism;ko00300//Lysine biosynthesis;ko00261//Monobactam biosynthesis	K12524;K12524;K12524;K12524;K12524;K12524;K12524	-	GO:0004072//aspartate kinase activity;GO:0004349//glutamate 5-kinase activity;GO:0016491//oxidoreductase activity;GO:0033862//UMP kinase activity;GO:0050661//NADP binding	GO:0006520//cellular amino acid metabolic process;GO:0006561//proline biosynthetic process;GO:0009089//lysine biosynthetic process via diaminopimelate;GO:0015949//nucleobase-containing small molecule interconversion;GO:0055114//oxidation-reduction process	--
TraesCS4B03G0861800	16058	9188	4273	2939	1155.94	869.903	395.595	397.567	1012.92	396.581	-1.35283	1.31715e-17	4.09515e-15	--	-	-	-	-	GO:0005576//extracellular region	GO:0008289//lipid binding;GO:0030170//pyridoxal phosphate binding	GO:0006869//lipid transport;GO:0009058//biosynthetic process;GO:0042157//lipoprotein metabolic process	--
TraesCS7A03G0833000	1036	1014	4650	5132	30.846	40.29	177.27	286.782	35.568	232.026	2.70563	1.32546e-17	4.10782e-15	PPH	-	-	-	-	-	GO:0003674//molecular_function;GO:0003824//catalytic activity;GO:0016787//hydrolase activity;GO:0047570//3-oxoadipate enol-lactonase activity;GO:0070205//2-succinyl-6-hydroxy-2,4-cyclohexadiene-1-carboxylate synthase activity	GO:0006629//lipid metabolic process;GO:0009102//biotin biosynthetic process;GO:0009234//menaquinone biosynthetic process;GO:0015979//photosynthesis;GO:0042952//beta-ketoadipate pathway	--
TraesCS6D03G0083900	1250	993	344	203	133.851	139.877	47.383	40.856	136.864	44.1195	-1.63325	1.42805e-17	4.41166e-15	--	-	-	-	-	-	-	-	--
TraesCS6D03G0630100	734	630	2901	2871	25.961	29.3	131.969	190.83	27.6305	161.399	2.5463	1.81955e-17	5.6033e-15	--	-	-	-	-	-	GO:0016491//oxidoreductase activity	GO:0055114//oxidation-reduction process	--
TraesCS4D03G0020600	125	114	697	897	2.477	2.953	17.717	33.34	2.715	25.5285	3.23308	1.90456e-17	5.8465e-15	Os12g0623900	Metabolism;Metabolism;Metabolism;Metabolism;Metabolism	Global and overview maps;Global and overview maps;Global and overview maps;Amino acid metabolism;Metabolism of other amino acids	ko01100//Metabolic pathways;ko01110//Biosynthesis of secondary metabolites;ko01230//Biosynthesis of amino acids;ko00270//Cysteine and methionine metabolism;ko00450//Selenocompound metabolism	K00549;K00549;K00549;K00549;K00549	-	GO:0003871//5-methyltetrahydropteroyltriglutamate-homocysteine S-methyltransferase activity;GO:0004357//glutamate-cysteine ligase activity;GO:0008270//zinc ion binding	GO:0006750//glutathione biosynthetic process;GO:0008652//cellular amino acid biosynthetic process;GO:0009086//methionine biosynthetic process	--
TraesCS4D03G0629500	52	35	342	637	1.84	1.629	15.544	42.339	1.7345	28.9415	4.06055	1.92498e-17	5.89056e-15	ALD1	Metabolism;Metabolism;Metabolism;Metabolism	Global and overview maps;Global and overview maps;Global and overview maps;Amino acid metabolism	ko01100//Metabolic pathways;ko01110//Biosynthesis of secondary metabolites;ko01230//Biosynthesis of amino acids;ko00300//Lysine biosynthesis	K10206;K10206;K10206;K10206	GO:0005737//cytoplasm	GO:0003824//catalytic activity;GO:0004400//histidinol-phosphate transaminase activity;GO:0004838//L-tyrosine:2-oxoglutarate aminotransferase activity;GO:0009016//succinyldiaminopimelate transaminase activity;GO:0016846//carbon-sulfur lyase activity;GO:0030170//pyridoxal phosphate binding;GO:0047688//aspartate 4-decarboxylase activity;GO:0048472//threonine-phosphate decarboxylase activity	GO:0000105//histidine biosynthetic process;GO:0006531//aspartate metabolic process;GO:0006559//L-phenylalanine catabolic process;GO:0006572//tyrosine catabolic process;GO:0009058//biosynthetic process;GO:0009236//cobalamin biosynthetic process;GO:0019877//diaminopimelate biosynthetic process;GO:0042398//cellular modified amino acid biosynthetic process	--
TraesCS6D03G0372200	399	420	2107	2922	9.462	13.117	64.315	130.333	11.2895	97.324	3.10781	2.51694e-17	7.67777e-15	AATP1	-	-	-	-	GO:0015627//type II protein secretion system complex;GO:0016021//integral component of membrane	GO:0005471//ATP:ADP antiporter activity	GO:0006862//nucleotide transport;GO:0015628//protein secretion by the type II secretion system	--
TraesCS7A03G0307600	117	92	609	604	3.287	3.415	22.073	31.991	3.351	27.032	3.012	2.61828e-17	7.96188e-15	DTX27	-	-	-	-	GO:0016020//membrane	GO:0015238//drug transmembrane transporter activity;GO:0015297//antiporter activity;GO:0042910//xenobiotic transporter activity	GO:0006855//drug transmembrane transport;GO:0042493//response to drug;GO:0055085//transmembrane transport	--
TraesCS4A03G1017200	1264	1090	4843	5069	35.141	39.855	173.103	264.757	37.498	218.93	2.54558	2.81162e-17	8.52309e-15	PAO	Metabolism;Metabolism	Global and overview maps;Metabolism of cofactors and vitamins	ko01110//Biosynthesis of secondary metabolites;ko00860//Porphyrin metabolism	K13071;K13071	GO:0005575//cellular_component;GO:0005622//intracellular;GO:0005623//cell;GO:0005737//cytoplasm;GO:0009507//chloroplast;GO:0009526//plastid envelope;GO:0009528//plastid inner membrane;GO:0009534//chloroplast thylakoid;GO:0009535//chloroplast thylakoid membrane;GO:0009536//plastid;GO:0009579//thylakoid;GO:0009706//chloroplast inner membrane;GO:0009941//chloroplast envelope;GO:0016020//membrane;GO:…	GO:0003674//molecular_function;GO:0003824//catalytic activity;GO:0004497//monooxygenase activity;GO:0005488//binding;GO:0010277//chlorophyllide a oxygenase [overall] activity;GO:0016491//oxidoreductase activity;GO:0016701//oxidoreductase activity, acting on single donors with incorporation of molecular oxygen;GO:0016703//oxidoreductase activity, acting on single donors with incorporation of molec…	GO:0000003//reproduction;GO:0002376//immune system process;GO:0003006//developmental process involved in reproduction;GO:0006725//cellular aromatic compound metabolic process;GO:0006778//porphyrin-containing compound metabolic process;GO:0006787//porphyrin-containing compound catabolic process;GO:0006807//nitrogen compound metabolic process;GO:0006950//response to stress;GO:0006952//defense respo…	--
TraesCS3A03G1207400	109	65	536	582	3.675	2.883	23.243	36.877	3.279	30.06	3.19652	3.24147e-17	9.79549e-15	SDC1	Metabolism;Metabolism;Metabolism	Global and overview maps;Global and overview maps;Amino acid metabolism	ko01100//Metabolic pathways;ko01110//Biosynthesis of secondary metabolites;ko00340//Histidine metabolism	K01590;K01590;K01590	-	GO:0003674//molecular_function;GO:0003824//catalytic activity;GO:0004351//glutamate decarboxylase activity;GO:0004837//tyrosine decarboxylase activity;GO:0005488//binding;GO:0008144//drug binding;GO:0016829//lyase activity;GO:0016830//carbon-carbon lyase activity;GO:0016831//carboxy-lyase activity;GO:0019842//vitamin binding;GO:0030170//pyridoxal phosphate binding;GO:0036094//small molecule bindi…	GO:0006082//organic acid metabolic process;GO:0006540//glutamate decarboxylation to succinate;GO:0006572//tyrosine catabolic process;GO:0008150//biological_process;GO:0008152//metabolic process;GO:0009987//cellular process;GO:0015940//pantothenate biosynthetic process;GO:0019752//carboxylic acid metabolic process;GO:0043436//oxoacid metabolic process;GO:0044237//cellular metabolic process;GO:0044…	--
TraesCS5D03G0741600	131243	100633	37985	16052	5789.72	5838.89	2155.09	1330.68	5814.31	1742.89	-1.73813	3.36079e-17	1.01245e-14	OsI_012078	Metabolism;Metabolism	Global and overview maps;Energy metabolism	ko01100//Metabolic pathways;ko00196//Photosynthesis - antenna proteins	K08913;K08913	GO:0005575//cellular_component;GO:0005622//intracellular;GO:0005623//cell;GO:0005737//cytoplasm;GO:0009507//chloroplast;GO:0009521//photosystem;GO:0009522//photosystem I;GO:0009523//photosystem II;GO:0009526//plastid envelope;GO:0009532//plastid stroma;GO:0009534//chloroplast thylakoid;GO:0009535//chloroplast thylakoid membrane;GO:0009536//plastid;GO:0009570//chloroplast stroma;GO:0009579//thylak…	GO:0003674//molecular_function;GO:0005488//binding;GO:0016168//chlorophyll binding;GO:0031409//pigment binding;GO:0043167//ion binding;GO:0043168//anion binding;GO:0043169//cation binding;GO:0046872//metal ion binding;GO:0046906//tetrapyrrole binding;GO:0048037//cofactor binding;GO:0097159//organic cyclic compound binding;GO:1901363//heterocyclic compound binding	GO:0006091//generation of precursor metabolites and energy;GO:0006464//cellular protein modification process;GO:0006807//nitrogen compound metabolic process;GO:0008150//biological_process;GO:0008152//metabolic process;GO:0009314//response to radiation;GO:0009416//response to light stimulus;GO:0009628//response to abiotic stimulus;GO:0009765//photosynthesis, light harvesting;GO:0009768//photosynth…	--
TraesCS2A03G0460500	364	177	31	11	9.24	5.96	1.001	0.514	7.6	0.7575	-3.32668	3.43586e-17	1.03186e-14	BMY1	Metabolism;Metabolism;Metabolism	Global and overview maps;Global and overview maps;Carbohydrate metabolism	ko01100//Metabolic pathways;ko01110//Biosynthesis of secondary metabolites;ko00500//Starch and sucrose metabolism	K01177;K01177;K01177	-	GO:0016161//beta-amylase activity	GO:0000272//polysaccharide catabolic process	--
TraesCS3B03G0747500	16	19	229	291	0.221	0.34	4.06	7.55	0.2805	5.805	4.37122	3.46891e-17	1.03858e-14	ABCB4	Environmental Information Processing	Membrane transport	ko02010//ABC transporters	K05658	GO:0005575//cellular_component;GO:0005737//cytoplasm;GO:0005887//integral component of plasma membrane;GO:0009288//bacterial-type flagellum;GO:0009380//excinuclease repair complex;GO:0009898//cytoplasmic side of plasma membrane;GO:0016021//integral component of membrane;GO:0043190//ATP-binding cassette (ABC) transporter complex;GO:0055051//ATP-binding cassette (ABC) transporter complex, integrate…	GO:0003674//molecular_function;GO:0003676//nucleic acid binding;GO:0003924//GTPase activity;GO:0004020//adenylylsulfate kinase activity;GO:0004140//dephospho-CoA kinase activity;GO:0005260//channel-conductance-controlling ATPase activity;GO:0005319//lipid transporter activity;GO:0005524//ATP binding;GO:0005525//GTP binding;GO:0008565//protein transporter activity;GO:0009381//excinuclease ABC acti…	GO:0000910//cytokinesis;GO:0001539//cilium or flagellum-dependent cell motility;GO:0006289//nucleotide-excision repair;GO:0006790//sulfur compound metabolic process;GO:0006810//transport;GO:0006817//phosphate ion transport;GO:0006824//cobalt ion transport;GO:0006855//drug transmembrane transport;GO:0006869//lipid transport;GO:0007186//G-protein coupled receptor signaling pathway;GO:0007601//visua…	--
TraesCS5B03G0655000	203	111	841	849	4.762	3.42	25.424	37.515	4.091	31.4695	2.94343	3.51071e-17	1.04786e-14	CSLE6	-	-	-	-	GO:0016020//membrane	GO:0016760//cellulose synthase (UDP-forming) activity	GO:0030244//cellulose biosynthetic process	--
TraesCS2B03G1193400	272	201	1144	1490	14.324	13.922	77.48	147.449	14.123	112.465	2.99335	3.62938e-17	1.07995e-14	SA bp2	-	-	-	-	-	GO:0003674//molecular_function;GO:0003677//DNA binding;GO:0003700//transcription factor activity, sequence-specific DNA binding;GO:0003824//catalytic activity;GO:0008236//serine-type peptidase activity;GO:0016787//hydrolase activity;GO:0016987//sigma factor activity;GO:0047570//3-oxoadipate enol-lactonase activity;GO:0070205//2-succinyl-6-hydroxy-2,4-cyclohexadiene-1-carboxylate synthase activity	GO:0006352//DNA-templated transcription, initiation;GO:0006355//regulation of transcription, DNA-templated;GO:0006508//proteolysis;GO:0009058//biosynthetic process;GO:0009102//biotin biosynthetic process;GO:0009234//menaquinone biosynthetic process;GO:0015979//photosynthesis;GO:0042952//beta-ketoadipate pathway	--
TraesCS6B03G0947300	222	210	1111	1365	6.654	8.288	42.917	77.021	7.471	59.969	3.00484	3.69125e-17	1.095e-14	SKIP11	-	-	-	-	-	GO:0005515//protein binding	-	--
TraesCS2A03G1191100	3497	2760	12061	12799	144.045	149.494	638.891	990.561	146.769	814.726	2.47276	3.76593e-17	1.11375e-14	Os04g0650000	-	-	-	-	-	GO:0008234//cysteine-type peptidase activity	GO:0006508//proteolysis	--
TraesCS2A03G0896400	3	11	183	293	0.181	0.871	14.172	33.155	0.526	23.6635	5.49146	4.1024e-17	1.20957e-14	PXG	Metabolism	Lipid metabolism	ko00073//Cutin, suberine and wax biosynthesis	K17991	-	-	-	--
TraesCS2B03G1489800	259	201	1140	1631	7.633	7.791	43.208	90.325	7.712	66.7665	3.11395	4.23389e-17	1.24258e-14	ALN	Genetic Information Processing	Replication and repair	ko03430//Mismatch repair	K07456	-	GO:0004151//dihydroorotase activity;GO:0004157//dihydropyrimidinase activity;GO:0008798//beta-aspartyl-peptidase activity;GO:0008892//guanine deaminase activity;GO:0016787//hydrolase activity;GO:0018835//carbon phosphorus lyase activity;GO:0050480//imidazolonepropionase activity	GO:0006147//guanine catabolic process;GO:0006508//proteolysis;GO:0006548//histidine catabolic process;GO:0008152//metabolic process;GO:0009220//pyrimidine ribonucleotide biosynthetic process;GO:0019634//organic phosphonate metabolic process	--
TraesCS1A03G0775700	34	12	252	425	0.526	0.244	5.015	12.358	0.385	8.6865	4.49584	4.23996e-17	1.24258e-14	ACA6	-	-	-	-	GO:0005575//cellular_component;GO:0005622//intracellular;GO:0005623//cell;GO:0005886//plasma membrane;GO:0005887//integral component of plasma membrane;GO:0016020//membrane;GO:0016021//integral component of membrane;GO:0031004//potassium ion-transporting ATPase complex;GO:0031224//intrinsic component of membrane;GO:0031226//intrinsic component of plasma membrane;GO:0043226//organelle;GO:0043227//…	GO:0000166//nucleotide binding;GO:0003674//molecular_function;GO:0003824//catalytic activity;GO:0004008//copper-exporting ATPase activity;GO:0004647//phosphoserine phosphatase activity;GO:0005215//transporter activity;GO:0005375//copper ion transmembrane transporter activity;GO:0005388//calcium-transporting ATPase activity;GO:0005488//binding;GO:0005515//protein binding;GO:0005516//calmodulin bin…	GO:0006545//glycine biosynthetic process;GO:0006564//L-serine biosynthetic process;GO:0006810//transport;GO:0006811//ion transport;GO:0006812//cation transport;GO:0006813//potassium ion transport;GO:0006816//calcium ion transport;GO:0006825//copper ion transport;GO:0008150//biological_process;GO:0008152//metabolic process;GO:0015691//cadmium ion transport;GO:0015693//magnesium ion transport;GO:00…	--
TraesCS1A03G0986900	17011	16348	5754	3004	1212.34	1532.35	527.418	402.334	1372.34	464.876	-1.56172	4.25475e-17	1.24315e-14	WHAB1.6	Metabolism;Metabolism	Global and overview maps;Energy metabolism	ko01100//Metabolic pathways;ko00196//Photosynthesis - antenna proteins	K08912;K08912	-	-	-	--
TraesCS7D03G0164900	17	11	216	214	0.595	0.506	9.723	14.075	0.5505	11.899	4.43395	4.46538e-17	1.30078e-14	ENO1	Metabolism;Metabolism;Metabolism;Metabolism;Metabolism;Genetic Information Processing	Global and overview maps;Global and overview maps;Global and overview maps;Global and overview maps;Carbohydrate metabolism;Folding, sorting and degradation	ko01100//Metabolic pathways;ko01110//Biosynthesis of secondary metabolites;ko01200//Carbon metabolism;ko01230//Biosynthesis of amino acids;ko00010//Glycolysis / Gluconeogenesis;ko03018//RNA degradation	K01689;K01689;K01689;K01689;K01689;K01689	GO:0000015//phosphopyruvate hydratase complex;GO:0005575//cellular_component;GO:0005622//intracellular;GO:0005623//cell;GO:0005737//cytoplasm;GO:0005829//cytosol;GO:0032991//macromolecular complex;GO:0044424//intracellular part;GO:0044444//cytoplasmic part;GO:0044445//cytosolic part;GO:0044464//cell part;GO:1902494//catalytic complex	GO:0000287//magnesium ion binding;GO:0003674//molecular_function;GO:0003824//catalytic activity;GO:0004634//phosphopyruvate hydratase activity;GO:0005488//binding;GO:0016829//lyase activity;GO:0016835//carbon-oxygen lyase activity;GO:0016836//hydro-lyase activity;GO:0043167//ion binding;GO:0043169//cation binding;GO:0046872//metal ion binding	GO:0005975//carbohydrate metabolic process;GO:0006082//organic acid metabolic process;GO:0006090//pyruvate metabolic process;GO:0006091//generation of precursor metabolites and energy;GO:0006096//glycolytic process;GO:0006139//nucleobase-containing compound metabolic process;GO:0006163//purine nucleotide metabolic process;GO:0006164//purine nucleotide biosynthetic process;GO:0006165//nucleoside d…	--
TraesCS3B03G1115100	166	157	866	1012	17.712	22.033	118.838	202.914	19.8725	160.876	3.0171	5.11337e-17	1.48508e-14	--	-	-	-	-	-	-	-	--
MSTRG.6321	71	52	416	512	6.905	6.651	52.029	93.566	6.778	72.7975	3.42496	5.3843e-17	1.5591e-14	--	-	-	-	-	-	-	-	--
TraesCS7D03G0485400	10	7	179	211	0.401	0.365	9.217	15.868	0.383	12.5425	5.03334	5.63088e-17	1.62565e-14	CGT	-	-	-	-	-	GO:0008194//UDP-glycosyltransferase activity	-	--
TraesCS4B03G0491700	127	70	603	541	1.912	1.393	11.701	15.346	1.6525	13.5235	3.03275	5.9694e-17	1.71827e-14	ALA1	-	-	-	-	GO:0031004//potassium ion-transporting ATPase complex	GO:0004008//copper-exporting ATPase activity;GO:0004647//phosphoserine phosphatase activity;GO:0005375//copper ion transmembrane transporter activity;GO:0005388//calcium-transporting ATPase activity;GO:0008556//potassium-transporting ATPase activity;GO:0008967//phosphoglycolate phosphatase activity;GO:0015434//cadmium-transporting ATPase activity;GO:0015444//magnesium-importing ATPase activity;GO…	GO:0006545//glycine biosynthetic process;GO:0006564//L-serine biosynthetic process;GO:0006813//potassium ion transport;GO:0006816//calcium ion transport;GO:0006825//copper ion transport;GO:0008152//metabolic process;GO:0015691//cadmium ion transport;GO:0015693//magnesium ion transport;GO:0030001//metal ion transport	--
TraesCS2B03G1065500	809	466	139	52	26.23	19.813	5.785	3.162	23.0215	4.4735	-2.36351	6.45412e-17	1.85229e-14	PP2A13	-	-	-	-	-	-	-	--
TraesCS7B03G0939500	31	38	338	326	0.931	1.492	12.999	18.301	1.2115	15.65	3.6913	6.53451e-17	1.86983e-14	BGLU25	Metabolism;Metabolism;Metabolism;Metabolism;Metabolism	Global and overview maps;Global and overview maps;Biosynthesis of other secondary metabolites;Carbohydrate metabolism;Metabolism of other amino acids	ko01100//Metabolic pathways;ko01110//Biosynthesis of secondary metabolites;ko00940//Phenylpropanoid biosynthesis;ko00500//Starch and sucrose metabolism;ko00460//Cyanoamino acid metabolism	K01188;K01188;K01188;K01188;K01188	GO:0009341//beta-galactosidase complex	GO:0004553//hydrolase activity, hydrolyzing O-glycosyl compounds;GO:0004565//beta-galactosidase activity	GO:0005975//carbohydrate metabolic process;GO:0006012//galactose metabolic process	--
TraesCS3A03G0714000	730	517	2687	3624	17.189	15.676	79.918	157.642	16.4325	118.78	2.85367	6.79245e-17	1.93793e-14	MODA	Metabolism;Metabolism;Metabolism;Metabolism	Global and overview maps;Global and overview maps;Carbohydrate metabolism;Energy metabolism	ko01100//Metabolic pathways;ko01200//Carbon metabolism;ko00620//Pyruvate metabolism;ko00710//Carbon fixation in photosynthetic organisms	K00029;K00029;K00029;K00029	-	GO:0004471//malate dehydrogenase (decarboxylating) (NAD+) activity;GO:0051287//NAD binding	GO:0055114//oxidation-reduction process	--
TraesCS6A03G0229300LC	37	45	379	343	0.89	1.424	11.73	15.512	1.157	13.621	3.55737	6.85074e-17	1.94882e-14	FRS5	-	-	-	-	-	-	-	--
TraesCS6A03G0387900	47070	33760	12712	4973	1911.07	1802.76	663.753	379.391	1856.91	521.572	-1.83197	6.87753e-17	1.95073e-14	CAB8	Metabolism;Metabolism	Global and overview maps;Energy metabolism	ko01100//Metabolic pathways;ko00196//Photosynthesis - antenna proteins	K08909;K08909	GO:0005575//cellular_component;GO:0005622//intracellular;GO:0005623//cell;GO:0005737//cytoplasm;GO:0009507//chloroplast;GO:0009521//photosystem;GO:0009522//photosystem I;GO:0009523//photosystem II;GO:0009526//plastid envelope;GO:0009532//plastid stroma;GO:0009534//chloroplast thylakoid;GO:0009535//chloroplast thylakoid membrane;GO:0009536//plastid;GO:0009570//chloroplast stroma;GO:0009579//thylak…	GO:0003674//molecular_function;GO:0005488//binding;GO:0016168//chlorophyll binding;GO:0031409//pigment binding;GO:0043167//ion binding;GO:0043168//anion binding;GO:0043169//cation binding;GO:0046872//metal ion binding;GO:0046906//tetrapyrrole binding;GO:0048037//cofactor binding;GO:0097159//organic cyclic compound binding;GO:1901363//heterocyclic compound binding	GO:0006091//generation of precursor metabolites and energy;GO:0006464//cellular protein modification process;GO:0006807//nitrogen compound metabolic process;GO:0008150//biological_process;GO:0008152//metabolic process;GO:0009314//response to radiation;GO:0009416//response to light stimulus;GO:0009628//response to abiotic stimulus;GO:0009765//photosynthesis, light harvesting;GO:0009768//photosynth…	--
TraesCS7D03G0958000	1160	845	243	80	56.242	53.879	15.165	7.291	55.0605	11.228	-2.29392	7.35776e-17	2.08085e-14	At4g02530	-	-	-	-	-	-	-	--
TraesCS3B03G0401400	2588	1651	705	382	44.101	37	15.446	12.23	40.5505	13.838	-1.55108	7.73112e-17	2.18009e-14	PEPC	Metabolism;Metabolism;Metabolism;Metabolism	Global and overview maps;Global and overview maps;Carbohydrate metabolism;Energy metabolism	ko01100//Metabolic pathways;ko01200//Carbon metabolism;ko00620//Pyruvate metabolism;ko00710//Carbon fixation in photosynthetic organisms	K01595;K01595;K01595;K01595	-	GO:0008964//phosphoenolpyruvate carboxylase activity	GO:0006099//tricarboxylic acid cycle;GO:0015977//carbon fixation	--
TraesCS5D03G0356800	237	329	1733	2408	6.653	12.126	62.528	126.932	9.3895	94.73	3.3347	8.0519e-17	2.26396e-14	--	-	-	-	-	-	GO:0003824//catalytic activity;GO:0003854//3-beta-hydroxy-delta5-steroid dehydrogenase activity;GO:0003978//UDP-glucose 4-epimerase activity;GO:0004764//shikimate 3-dehydrogenase (NADP+) activity;GO:0008839//4-hydroxy-tetrahydrodipicolinate reductase;GO:0016491//oxidoreductase activity;GO:0016616//oxidoreductase activity, acting on the CH-OH group of donors, NAD or NADP as acceptor;GO:0016620//ox…	GO:0005975//carbohydrate metabolic process;GO:0006012//galactose metabolic process;GO:0006694//steroid biosynthetic process;GO:0009089//lysine biosynthetic process via diaminopimelate;GO:0009423//chorismate biosynthetic process;GO:0055114//oxidation-reduction process	--
TraesCS3D03G0915600	258	172	1022	1222	7.023	6.171	35.806	62.583	6.597	49.1945	2.89862	9.36329e-17	2.62508e-14	S bp1	Metabolism;Metabolism	Global and overview maps;Energy metabolism	ko01100//Metabolic pathways;ko00920//Sulfur metabolism	K17285;K17285	GO:0001650//fibrillar center;GO:0005575//cellular_component;GO:0005622//intracellular;GO:0005623//cell;GO:0005634//nucleus;GO:0005730//nucleolus;GO:0005737//cytoplasm;GO:0005829//cytosol;GO:0016020//membrane;GO:0031974//membrane-enclosed lumen;GO:0031981//nuclear lumen;GO:0043226//organelle;GO:0043227//membrane-bounded organelle;GO:0043228//non-membrane-bounded organelle;GO:0043229//intracellular…	GO:0003674//molecular_function;GO:0003824//catalytic activity;GO:0005488//binding;GO:0008430//selenium binding;GO:0016491//oxidoreductase activity;GO:0016667//oxidoreductase activity, acting on a sulfur group of donors;GO:0016670//oxidoreductase activity, acting on a sulfur group of donors, oxygen as acceptor;GO:0018549//methanethiol oxidase activity	GO:0006810//transport;GO:0008104//protein localization;GO:0008150//biological_process;GO:0008152//metabolic process;GO:0015031//protein transport;GO:0015833//peptide transport;GO:0033036//macromolecule localization;GO:0042886//amide transport;GO:0045184//establishment of protein localization;GO:0051179//localization;GO:0051234//establishment of localization;GO:0055114//oxidation-reduction process…	--
TraesCS2D03G0421100	12	10	192	209	0.283	0.311	5.638	8.968	0.297	7.303	4.61995	9.66511e-17	2.70188e-14	--	-	-	-	-	-	-	-	--
TraesCS2D03G0329500	424	303	1790	1178	13.321	12.52	72.335	69.546	12.9205	70.9405	2.45695	1.00112e-16	2.7906e-14	CYP709B1	-	-	-	-	-	GO:0005506//iron ion binding;GO:0016705//oxidoreductase activity, acting on paired donors, with incorporation or reduction of molecular oxygen;GO:0020037//heme binding	GO:0055114//oxidation-reduction process	--
TraesCS6D03G0187600	94	128	753	1020	1.875	3.352	19.323	38.282	2.6135	28.8025	3.46214	1.06093e-16	2.94885e-14	At1g54570	-	-	-	-	-	GO:0003674//molecular_function;GO:0016746//transferase activity, transferring acyl groups;GO:0016747//transferase activity, transferring acyl groups other than amino-acyl groups	GO:0009058//biosynthetic process;GO:0015979//photosynthesis	--
TraesCS2D03G0863200	62	52	393	585	1.174	1.299	9.623	20.951	1.2365	15.287	3.62797	1.12663e-16	3.12252e-14	PAL	Metabolism;Metabolism;Metabolism;Metabolism	Global and overview maps;Global and overview maps;Biosynthesis of other secondary metabolites;Amino acid metabolism	ko01100//Metabolic pathways;ko01110//Biosynthesis of secondary metabolites;ko00940//Phenylpropanoid biosynthesis;ko00360//Phenylalanine metabolism	K10775;K10775;K10775;K10775	GO:0005575//cellular_component;GO:0005622//intracellular;GO:0005623//cell;GO:0005737//cytoplasm;GO:0044424//intracellular part;GO:0044464//cell part	GO:0003674//molecular_function;GO:0003824//catalytic activity;GO:0004397//histidine ammonia-lyase activity;GO:0016829//lyase activity;GO:0016840//carbon-nitrogen lyase activity;GO:0016841//ammonia-lyase activity;GO:0045548//phenylalanine ammonia-lyase activity;GO:0050368//tyrosine 2,3-aminomutase activity	GO:0006082//organic acid metabolic process;GO:0006520//cellular amino acid metabolic process;GO:0006548//histidine catabolic process;GO:0006558//L-phenylalanine metabolic process;GO:0006559//L-phenylalanine catabolic process;GO:0006725//cellular aromatic compound metabolic process;GO:0006807//nitrogen compound metabolic process;GO:0008150//biological_process;GO:0008152//metabolic process;GO:00090…	--
TraesCS1B03G0187500	43	29	291	516	1.74	1.543	15.141	39.219	1.6415	27.18	4.04946	1.16408e-16	3.21711e-14	URH2	Metabolism;Metabolism;Metabolism	Global and overview maps;Nucleotide metabolism;Metabolism of cofactors and vitamins	ko01100//Metabolic pathways;ko00240//Pyrimidine metabolism;ko00760//Nicotinate and nicotinamide metabolism	K01240;K01240;K01240	-	-	-	--
TraesCS7B03G0998600	23	17	217	343	1.407	1.368	17.075	39.436	1.3875	28.2555	4.34797	1.1909e-16	3.28188e-14	Cht8	Metabolism;Environmental Information Processing;Metabolism	Global and overview maps;Signal transduction;Carbohydrate metabolism	ko01100//Metabolic pathways;ko04016//MAPK signaling pathway - plant;ko00520//Amino sugar and nucleotide sugar metabolism	K20547;K20547;K20547	-	GO:0004568//chitinase activity	GO:0006032//chitin catabolic process;GO:0016998//cell wall macromolecule catabolic process	--
TraesCS2A03G0085500	14	28	295	289	0.84	2.213	22.889	32.782	1.5265	27.8355	4.18863	1.27602e-16	3.50649e-14	GSTF1	Metabolism;Metabolism	Global and overview maps;Metabolism of other amino acids	ko01100//Metabolic pathways;ko00480//Glutathione metabolism	K00799;K00799	-	GO:0005515//protein binding;GO:0016034//maleylacetoacetate isomerase activity	GO:0006559//L-phenylalanine catabolic process;GO:0006572//tyrosine catabolic process;GO:0006749//glutathione metabolic process	--
TraesCS7D03G1043100LC	26	37	309	405	0.966	1.809	14.769	28.284	1.3875	21.5265	3.95555	1.61391e-16	4.42247e-14	BGLU25	Metabolism;Metabolism;Metabolism;Metabolism;Metabolism	Global and overview maps;Global and overview maps;Biosynthesis of other secondary metabolites;Carbohydrate metabolism;Metabolism of other amino acids	ko01100//Metabolic pathways;ko01110//Biosynthesis of secondary metabolites;ko00940//Phenylpropanoid biosynthesis;ko00500//Starch and sucrose metabolism;ko00460//Cyanoamino acid metabolism	K01188;K01188;K01188;K01188;K01188	GO:0009341//beta-galactosidase complex	GO:0004553//hydrolase activity, hydrolyzing O-glycosyl compounds;GO:0004565//beta-galactosidase activity	GO:0005975//carbohydrate metabolic process;GO:0006012//galactose metabolic process;GO:0071704//organic substance metabolic process	--
TraesCS1D03G0985100	22402	18690	6216	2224	1584.65	1738.85	565.538	295.674	1661.75	430.606	-1.94826	1.83388e-16	5.00465e-14	LHBC	Metabolism;Metabolism	Global and overview maps;Energy metabolism	ko01100//Metabolic pathways;ko00196//Photosynthesis - antenna proteins	K08914;K08914	GO:0005575//cellular_component;GO:0005622//intracellular;GO:0005623//cell;GO:0005737//cytoplasm;GO:0009507//chloroplast;GO:0009521//photosystem;GO:0009522//photosystem I;GO:0009523//photosystem II;GO:0009526//plastid envelope;GO:0009532//plastid stroma;GO:0009534//chloroplast thylakoid;GO:0009535//chloroplast thylakoid membrane;GO:0009536//plastid;GO:0009570//chloroplast stroma;GO:0009579//thylak…	GO:0003674//molecular_function;GO:0005198//structural molecule activity;GO:0005488//binding;GO:0005515//protein binding;GO:0016168//chlorophyll binding;GO:0019904//protein domain specific binding;GO:0031409//pigment binding;GO:0043167//ion binding;GO:0043168//anion binding;GO:0043169//cation binding;GO:0046872//metal ion binding;GO:0046906//tetrapyrrole binding;GO:0048037//cofactor binding;GO:009…	GO:0001101//response to acid chemical;GO:0006091//generation of precursor metabolites and energy;GO:0006464//cellular protein modification process;GO:0006807//nitrogen compound metabolic process;GO:0006950//response to stress;GO:0008150//biological_process;GO:0008152//metabolic process;GO:0009314//response to radiation;GO:0009416//response to light stimulus;GO:0009628//response to abiotic stimulu…	--
TraesCS4B03G0096800	49	64	440	531	3.816	6.57	44.105	77.71	5.193	60.9075	3.55198	1.83668e-16	5.00465e-14	MGST3	Metabolism;Metabolism	Global and overview maps;Metabolism of other amino acids	ko01100//Metabolic pathways;ko00480//Glutathione metabolism	K00799;K00799	-	-	-	--
TraesCS7B03G1319800	22	7	206	275	0.776	0.325	9.347	18.232	0.5505	13.7895	4.64668	1.85493e-16	5.04022e-14	ATJ16	-	-	-	-	-	GO:0005515//protein binding	GO:0006457//protein folding;GO:0009408//response to heat	--
TraesCS6D03G0363400	89	93	563	720	3.015	4.159	24.523	45.837	3.587	35.18	3.29391	2.00761e-16	5.43984e-14	CAD2	Metabolism;Metabolism;Metabolism	Global and overview maps;Global and overview maps;Biosynthesis of other secondary metabolites	ko01100//Metabolic pathways;ko01110//Biosynthesis of secondary metabolites;ko00940//Phenylpropanoid biosynthesis	K00083;K00083;K00083	GO:0009320//phosphoribosylaminoimidazole carboxylase complex	GO:0003824//catalytic activity;GO:0004024//alcohol dehydrogenase activity, zinc-dependent;GO:0004638//phosphoribosylaminoimidazole carboxylase activity;GO:0008270//zinc ion binding;GO:0008743//L-threonine 3-dehydrogenase activity;GO:0016491//oxidoreductase activity;GO:0016655//oxidoreductase activity, acting on NAD(P)H, quinone or similar compound as acceptor;GO:0016887//ATPase activity;GO:001846…	GO:0002376//immune system process;GO:0006113//fermentation;GO:0006567//threonine catabolic process;GO:0008152//metabolic process;GO:0009152//purine ribonucleotide biosynthetic process;GO:0009404//toxin metabolic process;GO:0010127//mycothiol-dependent detoxification;GO:0019439//aromatic compound catabolic process;GO:0030436//asexual sporulation;GO:0030494//bacteriochlorophyll biosynthetic process…	--
TraesCS6B03G0887400	902	733	3256	3525	30.831	32.932	143.059	226.314	31.8815	184.686	2.53429	2.1443e-16	5.79403e-14	--	-	-	-	-	-	GO:0016491//oxidoreductase activity	GO:0055114//oxidation-reduction process	--
TraesCS5B03G0137600	2231	1415	586	286	129.689	108.185	43.81	31.242	118.937	37.526	-1.66424	2.23048e-16	6.01016e-14	RMA1H1	Genetic Information Processing	Folding, sorting and degradation	ko04141//Protein processing in endoplasmic reticulum	K10666	GO:0000109//nucleotide-excision repair complex;GO:0005575//cellular_component;GO:0005622//intracellular;GO:0005623//cell;GO:0005634//nucleus;GO:0005681//spliceosomal complex;GO:0005684//U2-type spliceosomal complex;GO:0005737//cytoplasm;GO:0005739//mitochondrion;GO:0005740//mitochondrial envelope;GO:0005741//mitochondrial outer membrane;GO:0005783//endoplasmic reticulum;GO:0005789//endoplasmic re…	GO:0003674//molecular_function;GO:0003824//catalytic activity;GO:0004842//ubiquitin-protein transferase activity;GO:0005488//binding;GO:0005515//protein binding;GO:0008270//zinc ion binding;GO:0016740//transferase activity;GO:0019787//ubiquitin-like protein transferase activity;GO:0019899//enzyme binding;GO:0043167//ion binding;GO:0043169//cation binding;GO:0044390//ubiquitin-like protein conjuga…	GO:0000375//RNA splicing, via transesterification reactions;GO:0000377//RNA splicing, via transesterification reactions with bulged adenosine as nucleophile;GO:0000398//mRNA splicing, via spliceosome;GO:0006139//nucleobase-containing compound metabolic process;GO:0006289//nucleotide-excision repair;GO:0006396//RNA processing;GO:0006397//mRNA processing;GO:0006464//cellular protein modification pr…	--
TraesCS7B03G0066100	56	39	353	361	3.226	2.955	26.151	39.077	3.0905	32.614	3.39958	2.2845e-16	6.13867e-14	DMP5	-	-	-	-	-	-	-	--
TraesCS2D03G1137900LC	76	61	434	663	2.148	2.254	15.72	35.092	2.201	25.406	3.52894	2.45635e-16	6.5822e-14	PGDH1	Metabolism;Metabolism;Metabolism;Metabolism;Metabolism;Metabolism	Global and overview maps;Global and overview maps;Global and overview maps;Global and overview maps;Amino acid metabolism;Amino acid metabolism	ko01100//Metabolic pathways;ko01110//Biosynthesis of secondary metabolites;ko01200//Carbon metabolism;ko01230//Biosynthesis of amino acids;ko00270//Cysteine and methionine metabolism;ko00260//Glycine, serine and threonine metabolism	K00058;K00058;K00058;K00058;K00058;K00058	-	GO:0003824//catalytic activity;GO:0003941//L-serine ammonia-lyase activity;GO:0004013//adenosylhomocysteinase activity;GO:0004455//ketol-acid reductoisomerase activity;GO:0004617//phosphoglycerate dehydrogenase activity;GO:0004644//phosphoribosylglycinamide formyltransferase activity;GO:0016616//oxidoreductase activity, acting on the CH-OH group of donors, NAD or NADP as acceptor;GO:0050661//NADP…	GO:0006094//gluconeogenesis;GO:0006564//L-serine biosynthetic process;GO:0006565//L-serine catabolic process;GO:0006730//one-carbon metabolic process;GO:0009097//isoleucine biosynthetic process;GO:0009099//valine biosynthetic process;GO:0009152//purine ribonucleotide biosynthetic process;GO:0030436//asexual sporulation;GO:0055114//oxidation-reduction process	--
TraesCS6B03G1023400	128	88	621	500	4.516	4.083	28.178	33.149	4.2995	30.6635	2.83428	3.3412e-16	8.92865e-14	UGT85A24	-	-	-	-	-	GO:0008194//UDP-glycosyltransferase activity;GO:0016758//transferase activity, transferring hexosyl groups	GO:0005975//carbohydrate metabolic process;GO:0030259//lipid glycosylation	--
TraesCS5A03G0939000	363	346	1619	1458	10.605	13.295	60.829	80.042	11.95	70.4355	2.55929	3.41265e-16	9.09454e-14	UGT83A1	-	-	-	-	-	GO:0008194//UDP-glycosyltransferase activity	-	--
TraesCS4B03G0861700	5768	3788	1811	1101	415.176	358.641	167.707	148.936	386.909	158.321	-1.28914	3.61047e-16	9.59533e-14	--	-	-	-	-	-	-	-	--
TraesCS5A03G0133700	20	18	209	314	0.552	0.654	7.415	16.279	0.603	11.847	4.29622	3.90729e-16	1.03558e-13	WAK4	-	-	-	-	GO:0016021//integral component of membrane	GO:0004672//protein kinase activity;GO:0004674//protein serine/threonine kinase activity;GO:0005509//calcium ion binding;GO:0005524//ATP binding;GO:0030247//polysaccharide binding	GO:0006468//protein phosphorylation	--
TraesCS5A03G0649400	92	63	614	355	2.877	2.587	24.621	20.779	2.732	22.7	3.05466	4.0652e-16	1.0745e-13	At4g20820	Metabolism;Metabolism;Metabolism	Global and overview maps;Global and overview maps;Biosynthesis of other secondary metabolites	ko01100//Metabolic pathways;ko01110//Biosynthesis of secondary metabolites;ko00940//Phenylpropanoid biosynthesis	K22395;K22395;K22395	GO:0005634//nucleus	GO:0003677//DNA binding;GO:0005496//steroid binding;GO:0008891//glycolate oxidase activity;GO:0016491//oxidoreductase activity;GO:0030284//estrogen receptor activity;GO:0050660//flavin adenine dinucleotide binding	GO:0005975//carbohydrate metabolic process;GO:0006355//regulation of transcription, DNA-templated;GO:0043401//steroid hormone mediated signaling pathway;GO:0055114//oxidation-reduction process	--
TraesCS6B03G1091600	303	203	1129	1325	9.107	8.025	43.635	74.849	8.566	59.242	2.78993	4.42052e-16	1.16524e-13	TIC55	-	-	-	-	-	GO:0010277//chlorophyllide a oxygenase [overall] activity;GO:0016491//oxidoreductase activity;GO:0018618//anthranilate 1,2-dioxygenase (deaminating, decarboxylating) activity;GO:0051537//2 iron, 2 sulfur cluster binding	GO:0006569//tryptophan catabolic process;GO:0055114//oxidation-reduction process	--
TraesCS4A03G0096800	340	307	1438	1412	9.478	11.287	51.625	74.06	10.3825	62.8425	2.59759	4.53087e-16	1.19109e-13	NRAMP2	-	-	-	-	GO:0005575//cellular_component;GO:0005887//integral component of plasma membrane;GO:0016020//membrane;GO:0016021//integral component of membrane;GO:0031224//intrinsic component of membrane;GO:0044425//membrane part	GO:0003674//molecular_function;GO:0005215//transporter activity;GO:0008324//cation transmembrane transporter activity;GO:0015075//ion transmembrane transporter activity;GO:0015318//inorganic solute uptake transmembrane transporter activity;GO:0022857//transmembrane transporter activity;GO:0022890//inorganic cation transmembrane transporter activity;GO:0046873//metal ion transmembrane transporter …	GO:0006810//transport;GO:0006811//ion transport;GO:0006812//cation transport;GO:0008150//biological_process;GO:0030001//metal ion transport;GO:0034220//ion transmembrane transport;GO:0042592//homeostatic process;GO:0048878//chemical homeostasis;GO:0050801//ion homeostasis;GO:0051179//localization;GO:0051234//establishment of localization;GO:0055065//metal ion homeostasis;GO:0055072//iron ion home…	--
TraesCS7D03G0086000	66	32	395	325	0.932	0.594	7.168	8.625	0.763	7.8965	3.37146	4.77913e-16	1.25296e-13	MIK2	-	-	-	-	-	GO:0004672//protein kinase activity;GO:0005515//protein binding;GO:0005524//ATP binding	GO:0006468//protein phosphorylation	--
TraesCS2D03G0992500	3	4	161	194	0.079	0.139	5.472	9.645	0.109	7.5585	6.1157	4.84678e-16	1.26727e-13	NPF8.3	-	-	-	-	GO:0016020//membrane	GO:0015333//peptide:proton symporter activity;GO:0022857//transmembrane transporter activity	GO:0015833//peptide transport;GO:0055085//transmembrane transport	--
TraesCS1B03G0745100	1125	661	205	63	30.018	23.201	7.036	3.159	26.6095	5.0975	-2.38408	4.92463e-16	1.28416e-13	CLA1	Metabolism;Metabolism;Metabolism;Metabolism	Global and overview maps;Global and overview maps;Metabolism of terpenoids and polyketides;Metabolism of cofactors and vitamins	ko01100//Metabolic pathways;ko01110//Biosynthesis of secondary metabolites;ko00900//Terpenoid backbone biosynthesis;ko00730//Thiamine metabolism	K01662;K01662;K01662;K01662	GO:0005575//cellular_component;GO:0005622//intracellular;GO:0005623//cell;GO:0005737//cytoplasm;GO:0009507//chloroplast;GO:0009532//plastid stroma;GO:0009536//plastid;GO:0009570//chloroplast stroma;GO:0043226//organelle;GO:0043227//membrane-bounded organelle;GO:0043229//intracellular organelle;GO:0043231//intracellular membrane-bounded organelle;GO:0044422//organelle part;GO:0044424//intracellula…	GO:0003674//molecular_function;GO:0003824//catalytic activity;GO:0004739//pyruvate dehydrogenase (acetyl-transferring) activity;GO:0004802//transketolase activity;GO:0005488//binding;GO:0008661//1-deoxy-D-xylulose-5-phosphate synthase activity;GO:0016624//oxidoreductase activity, acting on the aldehyde or oxo group of donors, disulfide as acceptor;GO:0016740//transferase activity;GO:0016744//tran…	GO:0006086//acetyl-CoA biosynthetic process from pyruvate;GO:0006098//pentose-phosphate shunt;GO:0006629//lipid metabolic process;GO:0006720//isoprenoid metabolic process;GO:0006721//terpenoid metabolic process;GO:0006725//cellular aromatic compound metabolic process;GO:0006766//vitamin metabolic process;GO:0006767//water-soluble vitamin metabolic process;GO:0006772//thiamine metabolic process;GO…	--
TraesCS3A03G1134100	331	216	1640	897	14.361	12.332	91.55	73.133	13.3465	82.3415	2.62516	5.49316e-16	1.42858e-13	BANGLUC	-	-	-	-	-	GO:0003674//molecular_function;GO:0003824//catalytic activity;GO:0004553//hydrolase activity, hydrolyzing O-glycosyl compounds;GO:0008422//beta-glucosidase activity;GO:0015926//glucosidase activity;GO:0016787//hydrolase activity;GO:0016798//hydrolase activity, acting on glycosyl bonds;GO:0042973//glucan endo-1,3-beta-D-glucosidase activity	GO:0000272//polysaccharide catabolic process;GO:0005975//carbohydrate metabolic process;GO:0005976//polysaccharide metabolic process;GO:0006073//cellular glucan metabolic process;GO:0006074//(1->3)-beta-D-glucan metabolic process;GO:0006076//(1->3)-beta-D-glucan catabolic process;GO:0006950//response to stress;GO:0006952//defense response;GO:0008150//biological_process;GO:0008152//metabolic proce…	--
TraesCS3D03G0866600	1215	973	4112	3727	52.843	55.642	229.943	304.492	54.2425	267.217	2.30052	5.55972e-16	1.44202e-13	RNS2	-	-	-	-	-	GO:0003723//RNA binding;GO:0033897//ribonuclease T2 activity	-	--
TraesCS5A03G0547600	3939	3974	16240	15816	100.3	133.091	531.802	756.731	116.695	644.266	2.46491	5.79069e-16	1.49792e-13	ALDH7B4	Metabolism;Metabolism;Metabolism;Metabolism;Metabolism;Metabolism;Metabolism;Metabolism;Metabolism;Metabolism;Metabolism;Metabolism;Metabolism;Metabolism	Global and overview maps;Global and overview maps;Carbohydrate metabolism;Amino acid metabolism;Carbohydrate metabolism;Lipid metabolism;Amino acid metabolism;Amino acid metabolism;Carbohydrate metabolism;Lipid metabolism;Amino acid metabolism;Amino acid metabolism;Metabolism of other amino acids;Amino acid metabolism	ko01100//Metabolic pathways;ko01110//Biosynthesis of secondary metabolites;ko00010//Glycolysis / Gluconeogenesis;ko00380//Tryptophan metabolism;ko00620//Pyruvate metabolism;ko00561//Glycerolipid metabolism;ko00330//Arginine and proline metabolism;ko00260//Glycine, serine and threonine metabolism;ko00053//Ascorbate and aldarate metabolism;ko00071//Fatty acid degradation;ko00310//Lysine degradation…	K14085;K14085;K14085;K14085;K14085;K14085;K14085;K14085;K14085;K14085;K14085;K14085;K14085;K14085	GO:0005575//cellular_component;GO:0005622//intracellular;GO:0005623//cell;GO:0005634//nucleus;GO:0005737//cytoplasm;GO:0005739//mitochondrion;GO:0005759//mitochondrial matrix;GO:0005829//cytosol;GO:0031974//membrane-enclosed lumen;GO:0043226//organelle;GO:0043227//membrane-bounded organelle;GO:0043229//intracellular organelle;GO:0043231//intracellular membrane-bounded organelle;GO:0043233//organe…	GO:0003674//molecular_function;GO:0003824//catalytic activity;GO:0003842//1-pyrroline-5-carboxylate dehydrogenase activity;GO:0004029//aldehyde dehydrogenase (NAD) activity;GO:0004043//L-aminoadipate-semialdehyde dehydrogenase activity;GO:0004350//glutamate-5-semialdehyde dehydrogenase activity;GO:0004491//methylmalonate-semialdehyde dehydrogenase (acylating) activity;GO:0004777//succinate-semial…	GO:0001101//response to acid chemical;GO:0001505//regulation of neurotransmitter levels;GO:0003008//system process;GO:0006081//cellular aldehyde metabolic process;GO:0006082//organic acid metabolic process;GO:0006520//cellular amino acid metabolic process;GO:0006527//arginine catabolic process;GO:0006553//lysine metabolic process;GO:0006554//lysine catabolic process;GO:0006561//proline biosynthet…	--
TraesCS5B03G1102900	740	466	156	74	31.978	26.485	8.67	6.009	29.2315	7.3395	-1.99377	6.26583e-16	1.61494e-13	At2g30620	-	-	-	-	GO:0000786//nucleosome	GO:0003677//DNA binding	GO:0006334//nucleosome assembly	--
TraesCS6B03G0305700	238	108	8	2	16.978	10.154	0.779	0.268	13.566	0.5235	-4.69566	6.27638e-16	1.61494e-13	WHAB1.6	Metabolism;Metabolism	Global and overview maps;Energy metabolism	ko01100//Metabolic pathways;ko00196//Photosynthesis - antenna proteins	K08912;K08912	-	GO:0003824//catalytic activity;GO:0046537//2,3-bisphosphoglycerate-independent phosphoglycerate mutase activity	-	--
TraesCS2B03G1196000	24	16	199	406	0.253	0.23	2.752	8.179	0.2415	5.4655	4.50026	6.56636e-16	1.68509e-13	ABCC9	-	-	-	-	GO:0005575//cellular_component;GO:0005737//cytoplasm;GO:0005887//integral component of plasma membrane;GO:0009380//excinuclease repair complex;GO:0009898//cytoplasmic side of plasma membrane;GO:0016021//integral component of membrane;GO:0043190//ATP-binding cassette (ABC) transporter complex;GO:0055051//ATP-binding cassette (ABC) transporter complex, integrated substrate binding;GO:0055052//ATP-b…	GO:0000166//nucleotide binding;GO:0003677//DNA binding;GO:0003924//GTPase activity;GO:0005260//channel-conductance-controlling ATPase activity;GO:0005319//lipid transporter activity;GO:0005524//ATP binding;GO:0005525//GTP binding;GO:0008565//protein transporter activity;GO:0009381//excinuclease ABC activity;GO:0015220//choline transmembrane transporter activity;GO:0015221//lipopolysaccharide tran…	GO:0000910//cytokinesis;GO:0006289//nucleotide-excision repair;GO:0006400//tRNA modification;GO:0006810//transport;GO:0006817//phosphate ion transport;GO:0006824//cobalt ion transport;GO:0006855//drug transmembrane transport;GO:0006869//lipid transport;GO:0007601//visual perception;GO:0008150//biological_process;GO:0008272//sulfate transport;GO:0015675//nickel cation transport;GO:0015689//molybda…	--
TraesCS5B03G0020200	120	115	647	674	9.195	11.589	63.759	97.048	10.392	80.4035	2.95178	6.61693e-16	1.69359e-13	CNR7	-	-	-	-	-	-	-	--
TraesCS4B03G0750300	648	705	3140	2793	31.535	45.125	196.527	255.421	38.33	225.974	2.55961	7.32731e-16	1.87047e-13	--	-	-	-	-	-	-	-	--
TraesCS7D03G1108200	371	304	68	30	14.456	15.575	3.387	2.197	15.0155	2.792	-2.42708	8.00493e-16	2.03809e-13	UPS1	-	-	-	-	GO:0016021//integral component of membrane	GO:0015144//carbohydrate transmembrane transporter activity	GO:0034219//carbohydrate transmembrane transport;GO:0071705//nitrogen compound transport	--
TraesCS7A03G1187500	488	256	69	30	13.791	9.515	2.508	1.593	11.653	2.0505	-2.50665	8.30442e-16	2.1088e-13	CRYD	-	-	-	-	GO:0005575//cellular_component;GO:0005622//intracellular;GO:0005623//cell;GO:0005737//cytoplasm;GO:0005739//mitochondrion;GO:0009507//chloroplast;GO:0009536//plastid;GO:0043226//organelle;GO:0043227//membrane-bounded organelle;GO:0043229//intracellular organelle;GO:0043231//intracellular membrane-bounded organelle;GO:0044424//intracellular part;GO:0044444//cytoplasmic part;GO:0044464//cell part	GO:0000166//nucleotide binding;GO:0003674//molecular_function;GO:0003676//nucleic acid binding;GO:0003677//DNA binding;GO:0003684//damaged DNA binding;GO:0003824//catalytic activity;GO:0003904//deoxyribodipyrimidine photo-lyase activity;GO:0003913//DNA photolyase activity;GO:0005488//binding;GO:0005524//ATP binding;GO:0008144//drug binding;GO:0009881//photoreceptor activity;GO:0016829//lyase acti…	GO:0000719//photoreactive repair;GO:0006139//nucleobase-containing compound metabolic process;GO:0006259//DNA metabolic process;GO:0006281//DNA repair;GO:0006290//pyrimidine dimer repair;GO:0006464//cellular protein modification process;GO:0006725//cellular aromatic compound metabolic process;GO:0006807//nitrogen compound metabolic process;GO:0006950//response to stress;GO:0006974//cellular respo…	--
TraesCS1A03G0928500	13	12	208	174	0.303	0.368	6.23	7.615	0.3355	6.9225	4.36691	8.8675e-16	2.24591e-13	Os07g0190000	Metabolism;Metabolism;Metabolism;Metabolism	Global and overview maps;Global and overview maps;Metabolism of terpenoids and polyketides;Metabolism of cofactors and vitamins	ko01100//Metabolic pathways;ko01110//Biosynthesis of secondary metabolites;ko00900//Terpenoid backbone biosynthesis;ko00730//Thiamine metabolism	K01662;K01662;K01662;K01662	GO:0005737//cytoplasm;GO:0045250//cytosolic pyruvate dehydrogenase complex	GO:0003824//catalytic activity;GO:0004739//pyruvate dehydrogenase (acetyl-transferring) activity;GO:0004802//transketolase activity;GO:0008661//1-deoxy-D-xylulose-5-phosphate synthase activity;GO:0016624//oxidoreductase activity, acting on the aldehyde or oxo group of donors, disulfide as acceptor;GO:0030976//thiamine pyrophosphate binding	GO:0006086//acetyl-CoA biosynthetic process from pyruvate;GO:0006098//pentose-phosphate shunt;GO:0008615//pyridoxine biosynthetic process;GO:0009228//thiamine biosynthetic process;GO:0009240//isopentenyl diphosphate biosynthetic process;GO:0016114//terpenoid biosynthetic process	--
TraesCSU03G0172300LC	4	9	175	182	0.101	0.298	5.67	8.593	0.1995	7.1315	5.15974	8.89488e-16	2.24698e-13	Os07g0271500	-	-	-	-	GO:0016020//membrane	GO:0004315//3-oxoacyl-[acyl-carrier-protein] synthase activity;GO:0004421//hydroxymethylglutaryl-CoA synthase activity;GO:0016747//transferase activity, transferring acyl groups other than amino-acyl groups	GO:0006633//fatty acid biosynthetic process	--
TraesCS3D03G0072200	979	556	192	75	27.762	20.737	7.002	3.997	24.2495	5.4995	-2.14058	8.95381e-16	2.25599e-13	HCR9-0	-	-	-	-	-	GO:0005515//protein binding	-	--
TraesCS2B03G0876500	5	4	149	194	0.325	0.342	12.459	23.702	0.3335	18.0805	5.7606	9.18113e-16	2.30727e-13	--	-	-	-	-	GO:0000176//nuclear exosome (RNase complex);GO:0009288//bacterial-type flagellum	GO:0003824//catalytic activity;GO:0005515//protein binding	GO:0006396//RNA processing;GO:0044780//bacterial-type flagellum assembly;GO:0050920//regulation of chemotaxis	--
TraesCS1A03G0846000	365	284	1361	1418	6.382	6.517	30.598	46.591	6.4495	38.5945	2.58114	9.83901e-16	2.46621e-13	ABCA2	-	-	-	-	GO:0005575//cellular_component;GO:0005887//integral component of plasma membrane;GO:0009380//excinuclease repair complex;GO:0009898//cytoplasmic side of plasma membrane;GO:0016021//integral component of membrane;GO:0043190//ATP-binding cassette (ABC) transporter complex;GO:0055051//ATP-binding cassette (ABC) transporter complex, integrated substrate binding;GO:0055052//ATP-binding cassette (ABC) …	GO:0005260//channel-conductance-controlling ATPase activity;GO:0005319//lipid transporter activity;GO:0005524//ATP binding;GO:0008565//protein transporter activity;GO:0009381//excinuclease ABC activity;GO:0015220//choline transmembrane transporter activity;GO:0015221//lipopolysaccharide transmembrane transporter activity;GO:0015412//molybdate transmembrane-transporting ATPase activity;GO:0015413/…	GO:0000910//cytokinesis;GO:0006289//nucleotide-excision repair;GO:0006810//transport;GO:0006817//phosphate ion transport;GO:0006824//cobalt ion transport;GO:0006855//drug transmembrane transport;GO:0006869//lipid transport;GO:0007601//visual perception;GO:0008150//biological_process;GO:0008272//sulfate transport;GO:0015675//nickel cation transport;GO:0015689//molybdate ion transport;GO:0015706//n…	--
TraesCS6A03G0150800	17	12	172	330	0.441	0.411	5.741	16.062	0.426	10.9015	4.67753	9.99626e-16	2.49917e-13	LIS	Metabolism;Metabolism	Global and overview maps;Metabolism of terpenoids and polyketides	ko01110//Biosynthesis of secondary metabolites;ko00902//Monoterpenoid biosynthesis	K15086;K15086	-	GO:0000287//magnesium ion binding;GO:0010333//terpene synthase activity;GO:0016829//lyase activity	-	--
TraesCS4A03G0902200	82	87	557	457	5.116	7.139	44.712	53.595	6.1275	49.1535	3.00392	1.12095e-15	2.79121e-13	CNR10	-	-	-	-	-	-	-	--
TraesCS5D03G0608700	12318	10223	3288	1043	921.584	1005.91	316.334	146.702	963.746	231.518	-2.05753	1.12219e-15	2.79121e-13	PSAG	Metabolism	Energy metabolism	ko00195//Photosynthesis	K08905	GO:0005575//cellular_component;GO:0005622//intracellular;GO:0005623//cell;GO:0005737//cytoplasm;GO:0009507//chloroplast;GO:0009521//photosystem;GO:0009522//photosystem I;GO:0009526//plastid envelope;GO:0009534//chloroplast thylakoid;GO:0009535//chloroplast thylakoid membrane;GO:0009536//plastid;GO:0009579//thylakoid;GO:0009941//chloroplast envelope;GO:0016020//membrane;GO:0016021//integral compon…	-	GO:0006091//generation of precursor metabolites and energy;GO:0006139//nucleobase-containing compound metabolic process;GO:0006725//cellular aromatic compound metabolic process;GO:0006732//coenzyme metabolic process;GO:0006733//oxidoreduction coenzyme metabolic process;GO:0006739//NADP metabolic process;GO:0006740//NADPH regeneration;GO:0006753//nucleoside phosphate metabolic process;GO:0006793//…	--
TraesCS1D03G0956000	1715	1518	6170	6350	53.005	61.401	245.534	370.253	57.203	307.894	2.42827	1.17277e-15	2.90955e-13	Os05g0567100	-	-	-	-	-	-	GO:0006629//lipid metabolic process	--
TraesCS7A03G1286100	1234	836	312	137	89.507	79.754	29.105	18.674	84.6305	23.8895	-1.8248	1.28882e-15	3.1893e-13	ATJ11	-	-	-	-	-	GO:0005515//protein binding	GO:0006457//protein folding;GO:0009408//response to heat	--
TraesCS5D03G0812200	5	2	147	206	0.284	0.149	10.738	21.988	0.2165	16.363	6.23993	1.321e-15	3.26061e-13	--	-	-	-	-	-	-	-	--
TraesCS3D03G1118900	82	35	422	405	1.536	0.862	10.165	14.254	1.199	12.2095	3.3481	1.56004e-15	3.84087e-13	--	-	-	-	-	-	-	-	--
TraesCS4D03G0155400	376	314	66	21	20.211	22.199	4.563	2.121	21.205	3.342	-2.66562	1.61251e-15	3.95999e-13	GUN4	-	-	-	-	-	-	-	--
TraesCS5A03G0009200	9	7	183	152	0.268	0.274	7.008	8.506	0.271	7.757	4.83913	1.65648e-15	4.05771e-13	CYP51	Metabolism;Metabolism;Metabolism	Global and overview maps;Global and overview maps;Lipid metabolism	ko01100//Metabolic pathways;ko01110//Biosynthesis of secondary metabolites;ko00100//Steroid biosynthesis	K05917;K05917;K05917	-	GO:0005506//iron ion binding;GO:0016705//oxidoreductase activity, acting on paired donors, with incorporation or reduction of molecular oxygen;GO:0020037//heme binding	GO:0055114//oxidation-reduction process	--
TraesCS5A03G1087600	288	262	1228	1151	10.167	12.169	55.754	76.357	11.168	66.0555	2.56431	1.78922e-15	4.37182e-13	PHT1-8	-	-	-	-	GO:0005887//integral component of plasma membrane;GO:0016021//integral component of membrane	GO:0008028//monocarboxylic acid transmembrane transporter activity;GO:0015114//phosphate ion transmembrane transporter activity;GO:0015238//drug transmembrane transporter activity;GO:0015295//solute:proton symporter activity;GO:0015307//drug:proton antiporter activity;GO:0022857//transmembrane transporter activity;GO:0042910//xenobiotic transporter activity;GO:0051119//sugar transmembrane transpo…	GO:0006810//transport;GO:0006817//phosphate ion transport;GO:0006855//drug transmembrane transport;GO:0008643//carbohydrate transport;GO:0015718//monocarboxylic acid transport;GO:0015893//drug transport;GO:0042493//response to drug;GO:0042908//xenobiotic transport;GO:0055085//transmembrane transport	--
TraesCS4B03G0082500	132	104	612	914	2.491	2.576	14.815	32.35	2.5335	23.5825	3.21851	1.82344e-15	4.44426e-13	Os03g0700700	Metabolism	Lipid metabolism	ko00591//Linoleic acid metabolism	K15718	-	GO:0005515//protein binding;GO:0016702//oxidoreductase activity, acting on single donors with incorporation of molecular oxygen, incorporation of two atoms of oxygen;GO:0046872//metal ion binding	GO:0055114//oxidation-reduction process	--
TraesCS7D03G0080900	1253	1019	285	82	62.633	66.993	18.322	7.703	64.813	13.0125	-2.31639	1.86608e-15	4.53677e-13	APS1	-	-	-	-	-	-	-	--
TraesCS5A03G0777500	273	440	2214	2788	10.375	21.949	108.053	198.88	16.162	153.466	3.24725	1.88772e-15	4.57483e-13	SGR	Metabolism;Metabolism	Global and overview maps;Metabolism of cofactors and vitamins	ko01110//Biosynthesis of secondary metabolites;ko00860//Porphyrin metabolism	K22013;K22013	GO:0005575//cellular_component;GO:0005622//intracellular;GO:0005623//cell;GO:0005737//cytoplasm;GO:0009507//chloroplast;GO:0009526//plastid envelope;GO:0009532//plastid stroma;GO:0009536//plastid;GO:0009570//chloroplast stroma;GO:0009941//chloroplast envelope;GO:0016020//membrane;GO:0031090//organelle membrane;GO:0031967//organelle envelope;GO:0031969//chloroplast membrane;GO:0031975//envelope;GO…	-	-	--
TraesCS2A03G1211600	22	18	202	316	0.288	0.309	3.396	7.762	0.2985	5.579	4.2242	1.89116e-15	4.57483e-13	ABCB19	Environmental Information Processing	Membrane transport	ko02010//ABC transporters	K05658	GO:0005575//cellular_component;GO:0005737//cytoplasm;GO:0005887//integral component of plasma membrane;GO:0009380//excinuclease repair complex;GO:0009898//cytoplasmic side of plasma membrane;GO:0016021//integral component of membrane;GO:0043190//ATP-binding cassette (ABC) transporter complex;GO:0055051//ATP-binding cassette (ABC) transporter complex, integrated substrate binding;GO:0055052//ATP-b…	GO:0000166//nucleotide binding;GO:0003674//molecular_function;GO:0003677//DNA binding;GO:0003924//GTPase activity;GO:0004020//adenylylsulfate kinase activity;GO:0004140//dephospho-CoA kinase activity;GO:0004849//uridine kinase activity;GO:0005260//channel-conductance-controlling ATPase activity;GO:0005319//lipid transporter activity;GO:0005524//ATP binding;GO:0005525//GTP binding;GO:0008565//prot…	GO:0000910//cytokinesis;GO:0006289//nucleotide-excision repair;GO:0006614//SRP-dependent cotranslational protein targeting to membrane;GO:0006790//sulfur compound metabolic process;GO:0006810//transport;GO:0006817//phosphate ion transport;GO:0006824//cobalt ion transport;GO:0006855//drug transmembrane transport;GO:0006869//lipid transport;GO:0007186//G-protein coupled receptor signaling pathway;G…	--
TraesCS5D03G0102800	8	5	137	236	0.158	0.13	3.475	8.748	0.144	6.1115	5.40739	1.91016e-15	4.60928e-13	CHX19	-	-	-	-	GO:0016021//integral component of membrane	GO:0005451//monovalent cation:proton antiporter activity;GO:0015299//solute:proton antiporter activity	GO:0006812//cation transport;GO:0015992//proton transport;GO:0055085//transmembrane transport	--
TraesCS1D03G0359800	1613	864	373	204	67.864	47.784	20.181	16.102	57.824	18.1415	-1.67237	2.00409e-15	4.82394e-13	RZPF34	Genetic Information Processing	Folding, sorting and degradation	ko04120//Ubiquitin mediated proteolysis	K10144	-	GO:0008270//zinc ion binding	-	--
TraesCS3B03G0027600	53	76	466	682	2.791	5.281	31.476	67.317	4.036	49.3965	3.61341	2.03822e-15	4.89395e-13	--	-	-	-	-	-	-	-	--
TraesCS7A03G0547900	26	13	204	292	0.627	0.412	6.328	13.252	0.5195	9.79	4.23611	2.22479e-15	5.32874e-13	XAT2	-	-	-	-	-	GO:0016757//transferase activity, transferring glycosyl groups	-	--
TraesCS1B03G1053500	171	134	4	8	12.225	12.631	0.372	1.075	12.428	0.7235	-4.10246	2.28723e-15	5.4648e-13	WHAB1.6	Metabolism;Metabolism	Global and overview maps;Energy metabolism	ko01100//Metabolic pathways;ko00196//Photosynthesis - antenna proteins	K08912;K08912	-	-	-	--
TraesCS3A03G0690300	1158	694	252	97	64.472	50.858	18.032	10.193	57.665	14.1125	-2.03072	2.34504e-15	5.58915e-13	RPL13	Genetic Information Processing	Translation	ko03010//Ribosome	K02871	GO:0000315//organellar large ribosomal subunit;GO:0005840//ribosome;GO:0022625//cytosolic large ribosomal subunit	GO:0003735//structural constituent of ribosome	GO:0006412//translation	--
TraesCS1A03G0385200	2102	950	415	255	71.877	43.692	18.58	16.76	57.7845	17.67	-1.70938	2.39142e-15	5.68534e-13	RZPF34	Genetic Information Processing	Folding, sorting and degradation	ko04120//Ubiquitin mediated proteolysis	K10144	-	GO:0008270//zinc ion binding	-	--
TraesCS4B03G0094500	464	312	88	42	20.661	18.272	5.039	3.514	19.4665	4.2765	-2.18649	2.39712e-15	5.68534e-13	PLA2-III	Metabolism;Metabolism;Metabolism;Metabolism;Metabolism;Metabolism;Metabolism	Global and overview maps;Global and overview maps;Lipid metabolism;Lipid metabolism;Lipid metabolism;Lipid metabolism;Lipid metabolism	ko01100//Metabolic pathways;ko01110//Biosynthesis of secondary metabolites;ko00564//Glycerophospholipid metabolism;ko00592//alpha-Linolenic acid metabolism;ko00565//Ether lipid metabolism;ko00591//Linoleic acid metabolism;ko00590//Arachidonic acid metabolism	K01047;K01047;K01047;K01047;K01047;K01047;K01047	GO:0005634//nucleus;GO:0005737//cytoplasm	GO:0004623//phospholipase A2 activity	GO:0006355//regulation of transcription, DNA-templated;GO:0006644//phospholipid metabolic process;GO:0050482//arachidonic acid secretion	--
TraesCS1B03G1283900LC	574	409	1921	2140	19.846	18.607	85.459	139.106	19.2265	112.282	2.54597	2.43392e-15	5.7526e-13	ASMT1	Metabolism;Metabolism	Global and overview maps;Amino acid metabolism	ko01100//Metabolic pathways;ko00380//Tryptophan metabolism	K22588;K22588	-	GO:0008171//O-methyltransferase activity;GO:0046983//protein dimerization activity	GO:0016051//carbohydrate biosynthetic process	--
TraesCS5A03G0535700	89	89	516	621	2.859	3.76	21.331	37.488	3.3095	29.4095	3.1516	2.43734e-15	5.7526e-13	LTA2	Metabolism;Metabolism;Metabolism;Metabolism;Metabolism;Metabolism	Global and overview maps;Global and overview maps;Global and overview maps;Carbohydrate metabolism;Carbohydrate metabolism;Carbohydrate metabolism	ko01100//Metabolic pathways;ko01110//Biosynthesis of secondary metabolites;ko01200//Carbon metabolism;ko00010//Glycolysis / Gluconeogenesis;ko00620//Pyruvate metabolism;ko00020//Citrate cycle (TCA cycle)	K00627;K00627;K00627;K00627;K00627;K00627	GO:0005737//cytoplasm;GO:0045252//oxoglutarate dehydrogenase complex;GO:0045254//pyruvate dehydrogenase complex	GO:0004149//dihydrolipoyllysine-residue succinyltransferase activity;GO:0004736//pyruvate carboxylase activity;GO:0004738//pyruvate dehydrogenase activity;GO:0004742//dihydrolipoyllysine-residue acetyltransferase activity;GO:0004847//urea carboxylase activity;GO:0005215//transporter activity;GO:0008948//oxaloacetate decarboxylase activity;GO:0015081//sodium ion transmembrane transporter activity;…	GO:0006086//acetyl-CoA biosynthetic process from pyruvate;GO:0006094//gluconeogenesis;GO:0006099//tricarboxylic acid cycle;GO:0006554//lysine catabolic process;GO:0006810//transport;GO:0006814//sodium ion transport;GO:0019627//urea metabolic process	--
TraesCS3A03G0234800	1967	1251	557	398	49.552	41.45	18.046	18.841	45.501	18.4435	-1.30279	2.57338e-15	6.04913e-13	Os01g0192000	-	-	-	-	GO:0005575//cellular_component;GO:0005622//intracellular;GO:0005623//cell;GO:0005634//nucleus;GO:0043226//organelle;GO:0043227//membrane-bounded organelle;GO:0043229//intracellular organelle;GO:0043231//intracellular membrane-bounded organelle;GO:0044424//intracellular part;GO:0044464//cell part	GO:0003674//molecular_function;GO:0003676//nucleic acid binding;GO:0003677//DNA binding;GO:0005488//binding;GO:0008270//zinc ion binding;GO:0043167//ion binding;GO:0043169//cation binding;GO:0046872//metal ion binding;GO:0046914//transition metal ion binding;GO:0097159//organic cyclic compound binding;GO:1901363//heterocyclic compound binding	GO:0001101//response to acid chemical;GO:0007154//cell communication;GO:0007165//signal transduction;GO:0007275//multicellular organism development;GO:0007568//aging;GO:0008150//biological_process;GO:0009719//response to endogenous stimulus;GO:0009725//response to hormone;GO:0009753//response to jasmonic acid;GO:0009755//hormone-mediated signaling pathway;GO:0009867//jasmonic acid mediated signal…	C3H
TraesCS6B03G1009700	115	114	619	805	5.13	6.696	35.436	67.299	5.913	51.3675	3.11889	2.57545e-15	6.04913e-13	NOL	Metabolism;Metabolism;Metabolism	Global and overview maps;Global and overview maps;Metabolism of cofactors and vitamins	ko01100//Metabolic pathways;ko01110//Biosynthesis of secondary metabolites;ko00860//Porphyrin metabolism	K13606;K13606;K13606	GO:0005575//cellular_component;GO:0005622//intracellular;GO:0005623//cell;GO:0005737//cytoplasm;GO:0009507//chloroplast;GO:0009534//chloroplast thylakoid;GO:0009535//chloroplast thylakoid membrane;GO:0009536//plastid;GO:0009579//thylakoid;GO:0016020//membrane;GO:0031976//plastid thylakoid;GO:0031984//organelle subcompartment;GO:0034357//photosynthetic membrane;GO:0042651//thylakoid membrane;GO:00…	GO:0003674//molecular_function;GO:0003824//catalytic activity;GO:0004316//3-oxoacyl-[acyl-carrier-protein] reductase (NADPH) activity;GO:0004757//sepiapterin reductase activity;GO:0004764//shikimate 3-dehydrogenase (NADP+) activity;GO:0008667//2,3-dihydro-2,3-dihydroxybenzoate dehydrogenase activity;GO:0008678//2-deoxy-D-gluconate 3-dehydrogenase activity;GO:0016491//oxidoreductase activity;GO:00…	GO:0000272//polysaccharide catabolic process;GO:0006633//fatty acid biosynthetic process;GO:0006725//cellular aromatic compound metabolic process;GO:0006729//tetrahydrobiopterin biosynthetic process;GO:0006778//porphyrin-containing compound metabolic process;GO:0006787//porphyrin-containing compound catabolic process;GO:0006807//nitrogen compound metabolic process;GO:0008150//biological_process;G…	G2-like
TraesCS3B03G0797400	20	14	176	365	0.416	0.383	4.709	14.269	0.3995	9.489	4.56999	2.64593e-15	6.19966e-13	LAMP1	-	-	-	-	-	GO:0016787//hydrolase activity	-	--
MSTRG.38073	2867	1974	851	399	160.604	145.444	61.312	42.003	153.024	51.6575	-1.56671	2.71105e-15	6.33693e-13	BHLH35	-	-	-	-	-	-	GO:0044237//cellular metabolic process;GO:0071704//organic substance metabolic process	--
TraesCS1B03G0563600	1754	1127	453	193	43.868	37.079	14.574	9.071	40.4735	11.8225	-1.77544	2.92387e-15	6.81796e-13	HEMA1	Metabolism;Metabolism;Metabolism	Global and overview maps;Global and overview maps;Metabolism of cofactors and vitamins	ko01100//Metabolic pathways;ko01110//Biosynthesis of secondary metabolites;ko00860//Porphyrin metabolism	K02492;K02492;K02492	GO:0005575//cellular_component;GO:0005622//intracellular;GO:0005623//cell;GO:0005737//cytoplasm;GO:0009507//chloroplast;GO:0009536//plastid;GO:0043226//organelle;GO:0043227//membrane-bounded organelle;GO:0043229//intracellular organelle;GO:0043231//intracellular membrane-bounded organelle;GO:0044424//intracellular part;GO:0044444//cytoplasmic part;GO:0044464//cell part	GO:0000166//nucleotide binding;GO:0003674//molecular_function;GO:0003824//catalytic activity;GO:0004764//shikimate 3-dehydrogenase (NADP+) activity;GO:0005488//binding;GO:0008641//small protein activating enzyme activity;GO:0008839//4-hydroxy-tetrahydrodipicolinate reductase;GO:0008883//glutamyl-tRNA reductase activity;GO:0016491//oxidoreductase activity;GO:0016616//oxidoreductase activity, actin…	GO:0006725//cellular aromatic compound metabolic process;GO:0006778//porphyrin-containing compound metabolic process;GO:0006779//porphyrin-containing compound biosynthetic process;GO:0006782//protoporphyrinogen IX biosynthetic process;GO:0006783//heme biosynthetic process;GO:0006807//nitrogen compound metabolic process;GO:0006813//potassium ion transport;GO:0008150//biological_process;GO:0008152/…	--
TraesCS2D03G0058200	203	177	933	730	7.634	8.754	45.123	51.586	8.194	48.3545	2.56101	3.04542e-15	7.08436e-13	UGT85A24	-	-	-	-	-	GO:0008194//UDP-glycosyltransferase activity	-	--
TraesCS3B03G1307400	25	20	207	359	1.119	1.178	11.91	30.204	1.1485	21.057	4.19648	3.1213e-15	7.24352e-13	VIT_06s0061g00120	-	-	-	-	-	GO:0004553//hydrolase activity, hydrolyzing O-glycosyl compounds	GO:0005975//carbohydrate metabolic process	--
TraesCS7D03G0623200	75497	65169	24393	9728	3953.84	4488.85	1642.97	957.373	4221.35	1300.17	-1.699	3.17781e-15	7.35704e-13	CAB1B	Metabolism;Metabolism	Global and overview maps;Energy metabolism	ko01100//Metabolic pathways;ko00196//Photosynthesis - antenna proteins	K08912;K08912	GO:0005575//cellular_component;GO:0005622//intracellular;GO:0005623//cell;GO:0005737//cytoplasm;GO:0009507//chloroplast;GO:0009521//photosystem;GO:0009522//photosystem I;GO:0009523//photosystem II;GO:0009526//plastid envelope;GO:0009532//plastid stroma;GO:0009534//chloroplast thylakoid;GO:0009535//chloroplast thylakoid membrane;GO:0009536//plastid;GO:0009570//chloroplast stroma;GO:0009579//thylak…	GO:0003674//molecular_function;GO:0003824//catalytic activity;GO:0005488//binding;GO:0016168//chlorophyll binding;GO:0031409//pigment binding;GO:0043167//ion binding;GO:0043168//anion binding;GO:0043169//cation binding;GO:0046537//2,3-bisphosphoglycerate-independent phosphoglycerate mutase activity;GO:0046872//metal ion binding;GO:0046906//tetrapyrrole binding;GO:0048037//cofactor binding;GO:0097…	GO:0006091//generation of precursor metabolites and energy;GO:0006464//cellular protein modification process;GO:0006807//nitrogen compound metabolic process;GO:0008150//biological_process;GO:0008152//metabolic process;GO:0009314//response to radiation;GO:0009416//response to light stimulus;GO:0009628//response to abiotic stimulus;GO:0009765//photosynthesis, light harvesting;GO:0009768//photosynth…	--
TraesCS4B03G0663100	587	569	2714	1856	16.04	20.449	95.365	95.297	18.2445	95.331	2.38548	3.4863e-15	8.05203e-13	MST4	-	-	-	-	GO:0005887//integral component of plasma membrane;GO:0016021//integral component of membrane	GO:0008028//monocarboxylic acid transmembrane transporter activity;GO:0015238//drug transmembrane transporter activity;GO:0015295//solute:proton symporter activity;GO:0015307//drug:proton antiporter activity;GO:0022857//transmembrane transporter activity;GO:0042910//xenobiotic transporter activity;GO:0051119//sugar transmembrane transporter activity	GO:0006810//transport;GO:0006855//drug transmembrane transport;GO:0008643//carbohydrate transport;GO:0015718//monocarboxylic acid transport;GO:0015893//drug transport;GO:0042493//response to drug;GO:0042908//xenobiotic transport;GO:0055085//transmembrane transport	--
TraesCS6B03G0305800	236	126	2	2	13.34	9.384	0.14	0.247	11.362	0.1935	-5.87574	3.6082e-15	8.31378e-13	WHAB1.6	Metabolism;Metabolism	Global and overview maps;Energy metabolism	ko01100//Metabolic pathways;ko00196//Photosynthesis - antenna proteins	K08912;K08912	-	GO:0003824//catalytic activity;GO:0046537//2,3-bisphosphoglycerate-independent phosphoglycerate mutase activity	-	--
TraesCS5D03G1042600	627	620	2598	2638	16.601	21.588	88.474	131.253	19.0945	109.864	2.52448	3.68518e-15	8.47103e-13	PHT1-8	-	-	-	-	GO:0005887//integral component of plasma membrane;GO:0016021//integral component of membrane	GO:0008028//monocarboxylic acid transmembrane transporter activity;GO:0015114//phosphate ion transmembrane transporter activity;GO:0015238//drug transmembrane transporter activity;GO:0015295//solute:proton symporter activity;GO:0015307//drug:proton antiporter activity;GO:0022857//transmembrane transporter activity;GO:0042910//xenobiotic transporter activity;GO:0051119//sugar transmembrane transpo…	GO:0006810//transport;GO:0006817//phosphate ion transport;GO:0006855//drug transmembrane transport;GO:0008643//carbohydrate transport;GO:0015718//monocarboxylic acid transport;GO:0015893//drug transport;GO:0042493//response to drug;GO:0042908//xenobiotic transport;GO:0055085//transmembrane transport	--
TraesCS5D03G0747300	417	249	1392	1232	10.464	8.198	44.872	58.044	9.331	51.458	2.46329	4.07678e-15	9.34902e-13	DTX40	-	-	-	-	GO:0016020//membrane	GO:0015238//drug transmembrane transporter activity;GO:0015297//antiporter activity;GO:0042910//xenobiotic transporter activity	GO:0006855//drug transmembrane transport;GO:0042493//response to drug;GO:0055085//transmembrane transport	--
TraesCS4D03G0826200	804	606	179	58	41.761	41.4	11.958	5.661	41.5805	8.8095	-2.23878	4.33892e-15	9.92214e-13	VSPA	-	-	-	-	-	-	-	--
TraesCS3B03G0090100	119	127	678	659	4.995	7.011	36.6	51.979	6.003	44.2895	2.88321	4.34715e-15	9.92214e-13	ENDO2	-	-	-	-	-	GO:0003676//nucleic acid binding;GO:0004519//endonuclease activity	GO:0006308//DNA catabolic process	--
TraesCS7A03G0828400	1183	701	251	89	30.378	23.676	8.289	4.295	27.027	6.292	-2.10281	4.4901e-15	1.02041e-12	algC	-	-	-	-	-	GO:0000287//magnesium ion binding;GO:0003674//molecular_function;GO:0003824//catalytic activity;GO:0004614//phosphoglucomutase activity;GO:0004615//phosphomannomutase activity;GO:0005488//binding;GO:0008966//phosphoglucosamine mutase activity;GO:0016853//isomerase activity;GO:0016866//intramolecular transferase activity;GO:0016868//intramolecular transferase activity, phosphotransferases;GO:00431…	GO:0000271//polysaccharide biosynthetic process;GO:0005975//carbohydrate metabolic process;GO:0005976//polysaccharide metabolic process;GO:0006082//organic acid metabolic process;GO:0006139//nucleobase-containing compound metabolic process;GO:0006629//lipid metabolic process;GO:0006725//cellular aromatic compound metabolic process;GO:0006807//nitrogen compound metabolic process;GO:0008150//biolog…	--
TraesCS2A03G0915200	303	337	1515	1672	8.515	12.45	54.746	88.267	10.4825	71.5065	2.77009	4.49173e-15	1.02041e-12	YSL12	-	-	-	-	GO:0016020//membrane	GO:0015198//oligopeptide transporter activity	GO:0006857//oligopeptide transport;GO:0055085//transmembrane transport	--
MSTRG.35824	2672	2043	779	310	98.342	98.896	36.874	21.44	98.619	29.157	-1.75802	4.58339e-15	1.0388e-12	--	-	-	-	-	-	-	-	--
TraesCS3B03G0844300	1272	1141	4557	4685	37.908	44.748	174.717	262.433	41.328	218.575	2.40294	4.93658e-15	1.11624e-12	Os01g0760600	Metabolism;Metabolism;Metabolism;Metabolism;Metabolism;Metabolism;Metabolism;Metabolism;Metabolism;Metabolism;Metabolism;Metabolism;Metabolism;Metabolism;Metabolism	Global and overview maps;Global and overview maps;Global and overview maps;Global and overview maps;Amino acid metabolism;Energy metabolism;Amino acid metabolism;Amino acid metabolism;Amino acid metabolism;Global and overview maps;Amino acid metabolism;Amino acid metabolism;Amino acid metabolism;Biosynthesis of other secondary metabolites;Biosynthesis of other secondary metabolites	ko01100//Metabolic pathways;ko01110//Biosynthesis of secondary metabolites;ko01200//Carbon metabolism;ko01230//Biosynthesis of amino acids;ko00270//Cysteine and methionine metabolism;ko00710//Carbon fixation in photosynthetic organisms;ko00330//Arginine and proline metabolism;ko00250//Alanine, aspartate and glutamate metabolism;ko00360//Phenylalanine metabolism;ko01210//2-Oxocarboxylic acid metab…	K14454;K14454;K14454;K14454;K14454;K14454;K14454;K14454;K14454;K14454;K14454;K14454;K14454;K14454;K14454	GO:0005737//cytoplasm	GO:0004400//histidinol-phosphate transaminase activity;GO:0030170//pyridoxal phosphate binding;GO:0048472//threonine-phosphate decarboxylase activity	GO:0000105//histidine biosynthetic process;GO:0009058//biosynthetic process;GO:0009236//cobalamin biosynthetic process	--
TraesCS6B03G0991400	6	1	144	194	0.269	0.059	8.389	16.467	0.164	12.428	6.24375	4.9563e-15	1.1181e-12	SRG1	-	-	-	-	-	GO:0003676//nucleic acid binding;GO:0016491//oxidoreductase activity;GO:0043138//3'-5' DNA helicase activity	GO:0055114//oxidation-reduction process	--
TraesCS5B03G1172900	665	500	156	63	38.696	38.292	11.691	6.889	38.494	9.29	-2.05088	5.07426e-15	1.14205e-12	RPL17	Genetic Information Processing	Translation	ko03010//Ribosome	K02879	GO:0005762//mitochondrial large ribosomal subunit;GO:0005840//ribosome;GO:0022625//cytosolic large ribosomal subunit	GO:0003735//structural constituent of ribosome	GO:0006412//translation	--
TraesCS5D03G0734700	636	687	2910	3676	20.187	28.674	118.812	219.311	24.4305	169.061	2.79079	5.15117e-15	1.15668e-12	SGR	Metabolism;Metabolism	Global and overview maps;Metabolism of cofactors and vitamins	ko01110//Biosynthesis of secondary metabolites;ko00860//Porphyrin metabolism	K22013;K22013	GO:0005575//cellular_component;GO:0005622//intracellular;GO:0005623//cell;GO:0005737//cytoplasm;GO:0009507//chloroplast;GO:0009526//plastid envelope;GO:0009532//plastid stroma;GO:0009536//plastid;GO:0009570//chloroplast stroma;GO:0009941//chloroplast envelope;GO:0016020//membrane;GO:0031090//organelle membrane;GO:0031967//organelle envelope;GO:0031969//chloroplast membrane;GO:0031975//envelope;GO…	-	-	--
TraesCS1A03G0205200	360	266	62	23	15.521	15.084	3.438	1.863	15.3025	2.6505	-2.52943	5.34359e-15	1.19711e-12	--	-	-	-	-	-	GO:0003690//double-stranded DNA binding	GO:0006355//regulation of transcription, DNA-templated	--
TraesCS4D03G0327900	2538	1688	727	327	102.993	89.568	38.503	24.784	96.2805	31.6435	-1.60533	5.48658e-15	1.22631e-12	rps5	Genetic Information Processing	Translation	ko03010//Ribosome	K02988	GO:0000312//plastid small ribosomal subunit;GO:0005840//ribosome;GO:0022627//cytosolic small ribosomal subunit	GO:0003723//RNA binding;GO:0003735//structural constituent of ribosome	GO:0006412//translation	--
TraesCS3D03G0066500	18	26	229	311	0.868	1.649	14.224	28.177	1.2585	21.2005	4.07432	5.61183e-15	1.25143e-12	MHZ4	-	-	-	-	-	-	-	--
TraesCS4B03G0188500	317	240	41	7	22.001	21.944	3.695	0.945	21.9725	2.32	-3.2435	5.83012e-15	1.29712e-12	GUN4	-	-	-	-	-	-	-	--
MSTRG.23220	37	24	264	256	1.246	1.063	11.448	16.201	1.1545	13.8245	3.58189	6.17049e-15	1.36971e-12	CYP71C4	-	-	-	-	GO:0016020//membrane;GO:0043231//intracellular membrane-bounded organelle	GO:0004497//monooxygenase activity;GO:0016705//oxidoreductase activity, acting on paired donors, with incorporation or reduction of molecular oxygen;GO:0046872//metal ion binding	-	--
TraesCS5B03G0032900LC	113	56	486	544	2.863	1.867	15.827	25.901	2.365	20.864	3.1411	6.25358e-15	1.38498e-12	--	-	-	-	-	-	-	-	--
TraesCS6B03G0816600	1087	735	245	81	44.987	40	13.02	6.327	42.4935	9.6735	-2.13513	6.72402e-15	1.48331e-12	At4g17560	Genetic Information Processing	Translation	ko03010//Ribosome	K02884	GO:0000311//plastid large ribosomal subunit;GO:0005575//cellular_component;GO:0005622//intracellular;GO:0005623//cell;GO:0005737//cytoplasm;GO:0005840//ribosome;GO:0009507//chloroplast;GO:0009526//plastid envelope;GO:0009532//plastid stroma;GO:0009536//plastid;GO:0009570//chloroplast stroma;GO:0009941//chloroplast envelope;GO:0016020//membrane;GO:0022625//cytosolic large ribosomal subunit;GO:0031…	GO:0003674//molecular_function;GO:0003676//nucleic acid binding;GO:0003723//RNA binding;GO:0003735//structural constituent of ribosome;GO:0005198//structural molecule activity;GO:0005488//binding;GO:0019843//rRNA binding;GO:0097159//organic cyclic compound binding;GO:1901363//heterocyclic compound binding	GO:0006412//translation;GO:0006518//peptide metabolic process;GO:0006807//nitrogen compound metabolic process;GO:0008150//biological_process;GO:0008152//metabolic process;GO:0009058//biosynthetic process;GO:0009059//macromolecule biosynthetic process;GO:0009987//cellular process;GO:0010467//gene expression;GO:0019538//protein metabolic process;GO:0034641//cellular nitrogen compound metabolic proc…	--
TraesCS2D03G1265000	9318	8115	3570	2229	392.545	449.663	193.425	176.449	421.104	184.937	-1.18714	6.72812e-15	1.48331e-12	TSJT1	-	-	-	-	-	GO:0004066//asparagine synthase (glutamine-hydrolyzing) activity	GO:0006529//asparagine biosynthetic process	--
TraesCS3A03G1126500	24	25	221	338	1.363	1.868	16.144	36.077	1.6155	26.1105	4.01458	6.90389e-15	1.51861e-12	VIT_06s0061g00120	-	-	-	-	-	GO:0004553//hydrolase activity, hydrolyzing O-glycosyl compounds	GO:0005975//carbohydrate metabolic process	--
TraesCS2A03G0210300	120	127	658	757	4.932	6.865	34.803	58.5	5.8985	46.6515	2.9835	6.97553e-15	1.53089e-12	NAM-B1	-	-	-	-	-	GO:0003677//DNA binding	GO:0006355//regulation of transcription, DNA-templated	NAC
TraesCS2D03G1100000	10	19	193	281	0.555	1.388	13.783	29.322	0.9715	21.5525	4.4715	7.00859e-15	1.53468e-12	--	-	-	-	-	-	-	-	--
TraesCS3A03G0737300	494	493	2080	2257	16.74	21.952	90.623	143.672	19.346	117.147	2.59822	7.03028e-15	1.53596e-12	Os01g0760600	Metabolism;Metabolism;Metabolism;Metabolism;Metabolism;Metabolism;Metabolism;Metabolism;Metabolism;Metabolism;Metabolism;Metabolism;Metabolism;Metabolism;Metabolism	Global and overview maps;Global and overview maps;Global and overview maps;Global and overview maps;Amino acid metabolism;Energy metabolism;Amino acid metabolism;Amino acid metabolism;Amino acid metabolism;Global and overview maps;Amino acid metabolism;Amino acid metabolism;Amino acid metabolism;Biosynthesis of other secondary metabolites;Biosynthesis of other secondary metabolites	ko01100//Metabolic pathways;ko01110//Biosynthesis of secondary metabolites;ko01200//Carbon metabolism;ko01230//Biosynthesis of amino acids;ko00270//Cysteine and methionine metabolism;ko00710//Carbon fixation in photosynthetic organisms;ko00330//Arginine and proline metabolism;ko00250//Alanine, aspartate and glutamate metabolism;ko00360//Phenylalanine metabolism;ko01210//2-Oxocarboxylic acid metab…	K14454;K14454;K14454;K14454;K14454;K14454;K14454;K14454;K14454;K14454;K14454;K14454;K14454;K14454;K14454	GO:0005575//cellular_component;GO:0005622//intracellular;GO:0005623//cell;GO:0005737//cytoplasm;GO:0044424//intracellular part;GO:0044464//cell part	GO:0003674//molecular_function;GO:0003824//catalytic activity;GO:0004069//L-aspartate:2-oxoglutarate aminotransferase activity;GO:0004400//histidinol-phosphate transaminase activity;GO:0005488//binding;GO:0008144//drug binding;GO:0008483//transaminase activity;GO:0016740//transferase activity;GO:0016769//transferase activity, transferring nitrogenous groups;GO:0019842//vitamin binding;GO:0030170/…	GO:0000105//histidine biosynthetic process;GO:0006082//organic acid metabolic process;GO:0006091//generation of precursor metabolites and energy;GO:0006099//tricarboxylic acid cycle;GO:0006101//citrate metabolic process;GO:0006103//2-oxoglutarate metabolic process;GO:0006520//cellular amino acid metabolic process;GO:0006522//alanine metabolic process;GO:0006531//aspartate metabolic process;GO:000…	--
TraesCS3A03G0531600	151	179	883	932	4.91	7.622	36.86	56.837	6.266	46.8485	2.90239	7.4061e-15	1.61443e-12	BHLH41	-	-	-	-	-	GO:0046983//protein dimerization activity	-	bHLH
TraesCS4B03G0722900	34	32	274	282	2.043	2.529	21.175	31.843	2.286	26.509	3.53558	7.6778e-15	1.6699e-12	UCC1	-	-	-	-	-	GO:0009055//electron carrier activity	-	--
TraesCS1D03G0185900	415	336	1656	1154	22.223	23.665	114.05	116.14	22.944	115.095	2.32664	8.62225e-15	1.87112e-12	GSTF1	Metabolism;Metabolism	Global and overview maps;Metabolism of other amino acids	ko01100//Metabolic pathways;ko00480//Glutathione metabolism	K00799;K00799	-	GO:0005515//protein binding;GO:0016034//maleylacetoacetate isomerase activity	GO:0006559//L-phenylalanine catabolic process;GO:0006572//tyrosine catabolic process;GO:0006749//glutathione metabolic process;GO:0019878//lysine biosynthetic process via aminoadipic acid	--
TraesCS5A03G0783800	79896	64096	24985	9429	2863.02	3020.9	1151.46	634.962	2941.96	893.209	-1.71971	8.69713e-15	1.88316e-12	OsI_012078	Metabolism;Metabolism	Global and overview maps;Energy metabolism	ko01100//Metabolic pathways;ko00196//Photosynthesis - antenna proteins	K08913;K08913	GO:0005575//cellular_component;GO:0005622//intracellular;GO:0005623//cell;GO:0005737//cytoplasm;GO:0009507//chloroplast;GO:0009521//photosystem;GO:0009522//photosystem I;GO:0009523//photosystem II;GO:0009526//plastid envelope;GO:0009532//plastid stroma;GO:0009534//chloroplast thylakoid;GO:0009535//chloroplast thylakoid membrane;GO:0009536//plastid;GO:0009570//chloroplast stroma;GO:0009579//thylak…	GO:0003674//molecular_function;GO:0005488//binding;GO:0016168//chlorophyll binding;GO:0031409//pigment binding;GO:0043167//ion binding;GO:0043168//anion binding;GO:0043169//cation binding;GO:0046872//metal ion binding;GO:0046906//tetrapyrrole binding;GO:0048037//cofactor binding;GO:0097159//organic cyclic compound binding;GO:1901363//heterocyclic compound binding	GO:0006091//generation of precursor metabolites and energy;GO:0006464//cellular protein modification process;GO:0006807//nitrogen compound metabolic process;GO:0008150//biological_process;GO:0008152//metabolic process;GO:0009314//response to radiation;GO:0009416//response to light stimulus;GO:0009628//response to abiotic stimulus;GO:0009765//photosynthesis, light harvesting;GO:0009768//photosynth…	--
TraesCS2B03G1308200	197	164	826	1147	5.473	5.98	29.462	59.777	5.7265	44.6195	2.96195	9.2798e-15	2.00485e-12	SHM4	Metabolism;Metabolism;Metabolism;Metabolism;Metabolism;Metabolism;Metabolism;Metabolism	Global and overview maps;Global and overview maps;Global and overview maps;Global and overview maps;Metabolism of other amino acids;Carbohydrate metabolism;Amino acid metabolism;Metabolism of cofactors and vitamins	ko01100//Metabolic pathways;ko01110//Biosynthesis of secondary metabolites;ko01200//Carbon metabolism;ko01230//Biosynthesis of amino acids;ko00460//Cyanoamino acid metabolism;ko00630//Glyoxylate and dicarboxylate metabolism;ko00260//Glycine, serine and threonine metabolism;ko00670//One carbon pool by folate	K00600;K00600;K00600;K00600;K00600;K00600;K00600;K00600	-	GO:0030170//pyridoxal phosphate binding;GO:0033806//fluorothreonine transaldolase activity	GO:0009058//biosynthetic process;GO:0090346//cellular organofluorine metabolic process	--
TraesCS1B03G1169100	40514	36992	15608	8550	2034.02	2442.69	1007.78	806.649	2238.36	907.216	-1.30292	9.35915e-15	2.01464e-12	WHAB1.6	Metabolism;Metabolism	Global and overview maps;Energy metabolism	ko01100//Metabolic pathways;ko00196//Photosynthesis - antenna proteins	K08912;K08912	-	-	-	--
TraesCS1B03G0482000	1510	1450	5733	6527	57.867	77.057	275.093	462.153	67.462	368.623	2.45	9.36666e-15	2.01464e-12	--	-	-	-	-	-	-	-	--
TraesCS2D03G0633300	100	89	617	399	4.004	4.687	31.863	30.133	4.3455	30.998	2.83458	1.01124e-14	2.17024e-12	IN2-2	-	-	-	-	-	GO:0047834//D-threo-aldose 1-dehydrogenase activity	-	--
TraesCS2D03G0000700	112	62	533	403	5.253	3.825	32.178	35.522	4.539	33.85	2.89871	1.02045e-14	2.18517e-12	Os10g0113000	-	-	-	-	-	GO:0047834//D-threo-aldose 1-dehydrogenase activity	-	--
TraesCS7A03G1036400	315	233	52	32	14.058	13.663	3.012	2.707	13.8605	2.8595	-2.27714	1.02391e-14	2.18775e-12	XTH25	-	-	-	-	GO:0005618//cell wall;GO:0048046//apoplast	GO:0004553//hydrolase activity, hydrolyzing O-glycosyl compounds;GO:0016762//xyloglucan:xyloglucosyl transferase activity	GO:0005975//carbohydrate metabolic process;GO:0006073//cellular glucan metabolic process	--
MSTRG.54103	943	556	211	161	20.076	16.637	5.982	5.397	18.3565	5.6895	-1.68992	1.05212e-14	2.24307e-12	--	-	-	-	-	-	-	-	--
TraesCS6D03G0018400	1578	1189	441	172	125.984	124.853	45.282	25.805	125.418	35.5435	-1.81909	1.11074e-14	2.36132e-12	--	-	-	-	-	-	-	GO:0001887//selenium compound metabolic process;GO:0006400//tRNA modification	--
TraesCS7A03G1017300	31	26	238	298	0.533	0.567	5.388	9.379	0.55	7.3835	3.7468	1.11245e-14	2.36132e-12	HMA2	-	-	-	-	GO:0031004//potassium ion-transporting ATPase complex	GO:0004008//copper-exporting ATPase activity;GO:0004647//phosphoserine phosphatase activity;GO:0005375//copper ion transmembrane transporter activity;GO:0005388//calcium-transporting ATPase activity;GO:0005507//copper ion binding;GO:0008556//potassium-transporting ATPase activity;GO:0015434//cadmium-transporting ATPase activity;GO:0015444//magnesium-importing ATPase activity;GO:0016787//hydrolase…	GO:0006545//glycine biosynthetic process;GO:0006564//L-serine biosynthetic process;GO:0006813//potassium ion transport;GO:0006816//calcium ion transport;GO:0006825//copper ion transport;GO:0008152//metabolic process;GO:0015691//cadmium ion transport;GO:0015693//magnesium ion transport;GO:0030001//metal ion transport	--
TraesCS6B03G0584700	26	20	216	256	0.936	0.94	9.936	17.25	0.938	13.593	3.85713	1.12708e-14	2.38714e-12	CYSK	Metabolism;Metabolism;Metabolism;Metabolism;Metabolism;Metabolism	Global and overview maps;Global and overview maps;Global and overview maps;Global and overview maps;Amino acid metabolism;Energy metabolism	ko01100//Metabolic pathways;ko01110//Biosynthesis of secondary metabolites;ko01200//Carbon metabolism;ko01230//Biosynthesis of amino acids;ko00270//Cysteine and methionine metabolism;ko00920//Sulfur metabolism	K01738;K01738;K01738;K01738;K01738;K01738	GO:0005737//cytoplasm	GO:0004122//cystathionine beta-synthase activity;GO:0004124//cysteine synthase activity;GO:0004794//L-threonine ammonia-lyase activity;GO:0004795//threonine synthase activity;GO:0004834//tryptophan synthase activity;GO:0008721//D-serine ammonia-lyase activity;GO:0008838//diaminopropionate ammonia-lyase activity;GO:0017025//T bp-class protein binding;GO:0030170//pyridoxal phosphate binding	GO:0000162//tryptophan biosynthetic process;GO:0006535//cysteine biosynthetic process from serine;GO:0006549//isoleucine metabolic process;GO:0008152//metabolic process;GO:0009058//biosynthetic process;GO:0009088//threonine biosynthetic process;GO:0009097//isoleucine biosynthetic process;GO:0019344//cysteine biosynthetic process;GO:0042400//ectoine catabolic process;GO:0046416//D-amino acid metab…	--
TraesCS7A03G0072700	322	279	1243	1270	11.73	13.368	58.236	86.94	12.549	72.588	2.53216	1.25527e-14	2.65286e-12	GSTU6	Metabolism;Metabolism	Global and overview maps;Metabolism of other amino acids	ko01100//Metabolic pathways;ko00480//Glutathione metabolism	K00799;K00799	-	GO:0005515//protein binding;GO:0015035//protein disulfide oxidoreductase activity;GO:0016034//maleylacetoacetate isomerase activity	GO:0006559//L-phenylalanine catabolic process;GO:0006572//tyrosine catabolic process;GO:0006749//glutathione metabolic process;GO:0006790//sulfur compound metabolic process;GO:0042965//glutaredoxin biosynthetic process;GO:0045454//cell redox homeostasis;GO:0055114//oxidation-reduction process	--
TraesCS2B03G1062700	563	526	134	45	51.013	62.686	15.615	7.662	56.8495	11.6385	-2.28824	1.34484e-14	2.83598e-12	--	-	-	-	-	-	GO:0003674//molecular_function	GO:0030436//asexual sporulation	--
TraesCS2B03G1355200	8065	6254	23991	23852	249.4	254.342	954.114	1386.03	251.871	1170.07	2.21584	1.364e-14	2.87015e-12	Os04g0650000	-	-	-	-	-	GO:0008234//cysteine-type peptidase activity	GO:0006508//proteolysis	--
TraesCS1D03G0427100	4686	3086	1288	483	168.233	145.7	59.462	32.563	156.966	46.0125	-1.77036	1.41179e-14	2.96426e-12	HEMA1	Metabolism;Metabolism;Metabolism	Global and overview maps;Global and overview maps;Metabolism of cofactors and vitamins	ko01100//Metabolic pathways;ko01110//Biosynthesis of secondary metabolites;ko00860//Porphyrin metabolism	K02492;K02492;K02492	GO:0005575//cellular_component;GO:0005622//intracellular;GO:0005623//cell;GO:0005737//cytoplasm;GO:0009507//chloroplast;GO:0009536//plastid;GO:0043226//organelle;GO:0043227//membrane-bounded organelle;GO:0043229//intracellular organelle;GO:0043231//intracellular membrane-bounded organelle;GO:0044424//intracellular part;GO:0044444//cytoplasmic part;GO:0044464//cell part	GO:0000166//nucleotide binding;GO:0003674//molecular_function;GO:0003824//catalytic activity;GO:0004735//pyrroline-5-carboxylate reductase activity;GO:0004764//shikimate 3-dehydrogenase (NADP+) activity;GO:0005488//binding;GO:0008641//small protein activating enzyme activity;GO:0008839//4-hydroxy-tetrahydrodipicolinate reductase;GO:0008883//glutamyl-tRNA reductase activity;GO:0016491//oxidoreduct…	GO:0006561//proline biosynthetic process;GO:0006725//cellular aromatic compound metabolic process;GO:0006778//porphyrin-containing compound metabolic process;GO:0006779//porphyrin-containing compound biosynthetic process;GO:0006782//protoporphyrinogen IX biosynthetic process;GO:0006783//heme biosynthetic process;GO:0006807//nitrogen compound metabolic process;GO:0006813//potassium ion transport;G…	--
TraesCS3D03G0609500	252	203	980	871	6.968	7.335	34.464	44.868	7.1515	39.666	2.47159	1.43708e-14	3.01085e-12	LRK10L-1.2	-	-	-	-	-	GO:0004672//protein kinase activity;GO:0005524//ATP binding;GO:0030247//polysaccharide binding	GO:0006468//protein phosphorylation	--
TraesCS5D03G0730100	463	366	1629	1356	14.621	15.217	66.198	80.517	14.919	73.3575	2.29779	1.47225e-14	3.0779e-12	CYP71A9	-	-	-	-	-	GO:0005506//iron ion binding;GO:0016705//oxidoreductase activity, acting on paired donors, with incorporation or reduction of molecular oxygen;GO:0020037//heme binding	GO:0055114//oxidation-reduction process	--
TraesCS5A03G1100400	1045	818	276	102	90.622	93.336	30.795	16.629	91.979	23.712	-1.95569	1.494e-14	3.11664e-12	--	-	-	-	-	-	-	-	--
TraesCS6A03G0187000	3155	2199	1040	551	105.322	96.567	44.637	34.565	100.945	39.601	-1.34995	1.68121e-14	3.49227e-12	--	-	-	-	-	-	-	-	--
TraesCS6A03G0337900	3	4	143	161	0.1	0.187	6.139	10.135	0.1435	8.137	5.82537	1.68126e-14	3.49227e-12	FLOT1	-	-	-	-	-	-	-	--
TraesCS4B03G0557600	114	69	507	439	6.238	4.948	35.551	44.978	5.593	40.2645	2.84781	1.69031e-14	3.50357e-12	Os03g0283200	Metabolism;Metabolism	Global and overview maps;Metabolism of other amino acids	ko01100//Metabolic pathways;ko00480//Glutathione metabolism	K00799;K00799	-	GO:0005515//protein binding;GO:0015035//protein disulfide oxidoreductase activity;GO:0016034//maleylacetoacetate isomerase activity	GO:0006559//L-phenylalanine catabolic process;GO:0006572//tyrosine catabolic process;GO:0006749//glutathione metabolic process;GO:0006790//sulfur compound metabolic process;GO:0042965//glutaredoxin biosynthetic process;GO:0045454//cell redox homeostasis;GO:0055114//oxidation-reduction process	--
TraesCS5B03G1221400	769	538	155	42	42.432	39.028	11.005	4.357	40.73	7.681	-2.40673	1.70919e-14	3.53515e-12	RPL18	Genetic Information Processing	Translation	ko03010//Ribosome	K02881	GO:0000315//organellar large ribosomal subunit;GO:0005840//ribosome;GO:0022625//cytosolic large ribosomal subunit	GO:0003735//structural constituent of ribosome	GO:0006412//translation	--
TraesCS6A03G0106300	1027	783	310	206	48.814	48.949	18.95	18.4	48.8815	18.675	-1.38818	1.72706e-14	3.56451e-12	PER70	Metabolism;Metabolism;Metabolism	Global and overview maps;Global and overview maps;Biosynthesis of other secondary metabolites	ko01100//Metabolic pathways;ko01110//Biosynthesis of secondary metabolites;ko00940//Phenylpropanoid biosynthesis	K00430;K00430;K00430	-	GO:0004601//peroxidase activity;GO:0020037//heme binding	GO:0006979//response to oxidative stress;GO:0055114//oxidation-reduction process	--
TraesCS7A03G0552300	201	177	845	927	7.02	8.113	37.926	60.77	7.5665	49.348	2.70529	1.73562e-14	3.56726e-12	ROMT-15	-	-	-	-	GO:0005575//cellular_component;GO:0005622//intracellular;GO:0005623//cell;GO:0005634//nucleus;GO:0043226//organelle;GO:0043227//membrane-bounded organelle;GO:0043229//intracellular organelle;GO:0043231//intracellular membrane-bounded organelle;GO:0044424//intracellular part;GO:0044464//cell part	GO:0003674//molecular_function;GO:0003824//catalytic activity;GO:0005488//binding;GO:0008168//methyltransferase activity;GO:0008171//O-methyltransferase activity;GO:0008757//S-adenosylmethionine-dependent methyltransferase activity;GO:0016740//transferase activity;GO:0016741//transferase activity, transferring one-carbon groups;GO:0043167//ion binding;GO:0043169//cation binding;GO:0046872//metal …	GO:0008150//biological_process;GO:0008152//metabolic process;GO:0032259//methylation	--
TraesCS6D03G0118700	99	123	627	1011	3.722	6.084	30.324	71.444	4.903	50.884	3.37548	1.73575e-14	3.56726e-12	CYP76M5	-	-	-	-	-	GO:0005506//iron ion binding;GO:0016705//oxidoreductase activity, acting on paired donors, with incorporation or reduction of molecular oxygen;GO:0020037//heme binding	GO:0055114//oxidation-reduction process	--
TraesCS6D03G0780300	1467	1426	5517	5585	43.871	56.085	212.175	313.813	49.978	262.994	2.39566	1.82996e-14	3.75292e-12	TIC55	-	-	-	-	-	GO:0010277//chlorophyllide a oxygenase [overall] activity;GO:0016491//oxidoreductase activity;GO:0051537//2 iron, 2 sulfur cluster binding	GO:0055114//oxidation-reduction process	--
TraesCS7B03G0342700	37943	25549	9883	3087	1840.25	1629.73	616.474	281.316	1734.99	448.895	-1.95048	1.89946e-14	3.88724e-12	LHC	Metabolism;Metabolism	Global and overview maps;Energy metabolism	ko01100//Metabolic pathways;ko00196//Photosynthesis - antenna proteins	K08907;K08907	GO:0005575//cellular_component;GO:0005622//intracellular;GO:0005623//cell;GO:0005737//cytoplasm;GO:0009507//chloroplast;GO:0009521//photosystem;GO:0009522//photosystem I;GO:0009523//photosystem II;GO:0009526//plastid envelope;GO:0009532//plastid stroma;GO:0009534//chloroplast thylakoid;GO:0009535//chloroplast thylakoid membrane;GO:0009536//plastid;GO:0009570//chloroplast stroma;GO:0009579//thylak…	GO:0003674//molecular_function;GO:0005488//binding;GO:0005515//protein binding;GO:0016168//chlorophyll binding;GO:0019904//protein domain specific binding;GO:0031409//pigment binding;GO:0043167//ion binding;GO:0043168//anion binding;GO:0043169//cation binding;GO:0046872//metal ion binding;GO:0046906//tetrapyrrole binding;GO:0048037//cofactor binding;GO:0097159//organic cyclic compound binding;GO:…	GO:0006091//generation of precursor metabolites and energy;GO:0006464//cellular protein modification process;GO:0006807//nitrogen compound metabolic process;GO:0006950//response to stress;GO:0008150//biological_process;GO:0008152//metabolic process;GO:0009266//response to temperature stimulus;GO:0009314//response to radiation;GO:0009409//response to cold;GO:0009416//response to light stimulus;GO:…	--
TraesCS2D03G0343400	246	131	862	1381	12.801	8.966	57.702	135.053	10.8835	96.3775	3.14655	2.01566e-14	4.11636e-12	RNS1	-	-	-	-	-	GO:0003723//RNA binding;GO:0033897//ribonuclease T2 activity	-	--
TraesCS7B03G1134600	600	398	136	92	39.579	34.556	11.543	11.409	37.0675	11.476	-1.69153	2.02547e-14	4.12771e-12	RPL35	Genetic Information Processing	Translation	ko03010//Ribosome	K02916	GO:0000315//organellar large ribosomal subunit;GO:0005840//ribosome;GO:0022625//cytosolic large ribosomal subunit	GO:0003735//structural constituent of ribosome	GO:0006412//translation	--
TraesCS1B03G1209500	26313	18318	7316	2464	1290.41	1181.55	461.434	227.108	1235.98	344.271	-1.84404	2.08741e-14	4.24502e-12	LHBC	Metabolism;Metabolism	Global and overview maps;Energy metabolism	ko01100//Metabolic pathways;ko00196//Photosynthesis - antenna proteins	K08914;K08914	GO:0005575//cellular_component;GO:0005622//intracellular;GO:0005623//cell;GO:0005737//cytoplasm;GO:0009507//chloroplast;GO:0009521//photosystem;GO:0009522//photosystem I;GO:0009523//photosystem II;GO:0009526//plastid envelope;GO:0009532//plastid stroma;GO:0009534//chloroplast thylakoid;GO:0009535//chloroplast thylakoid membrane;GO:0009536//plastid;GO:0009570//chloroplast stroma;GO:0009579//thylak…	GO:0003674//molecular_function;GO:0005198//structural molecule activity;GO:0005488//binding;GO:0005515//protein binding;GO:0016168//chlorophyll binding;GO:0019904//protein domain specific binding;GO:0031409//pigment binding;GO:0043167//ion binding;GO:0043168//anion binding;GO:0043169//cation binding;GO:0046872//metal ion binding;GO:0046906//tetrapyrrole binding;GO:0048037//cofactor binding;GO:009…	GO:0001101//response to acid chemical;GO:0006091//generation of precursor metabolites and energy;GO:0006464//cellular protein modification process;GO:0006807//nitrogen compound metabolic process;GO:0006950//response to stress;GO:0008150//biological_process;GO:0008152//metabolic process;GO:0009314//response to radiation;GO:0009416//response to light stimulus;GO:0009628//response to abiotic stimulu…	--
TraesCS4B03G0308000	2	0	265	406	0.063	0	10.755	24.075	0.0315	17.415	9.11076	2.15631e-14	4.37595e-12	ZIFL1	-	-	-	-	GO:0005887//integral component of plasma membrane;GO:0016021//integral component of membrane;GO:0033177//proton-transporting two-sector ATPase complex, proton-transporting domain	GO:0015078//hydrogen ion transmembrane transporter activity;GO:0015114//phosphate ion transmembrane transporter activity;GO:0015307//drug:proton antiporter activity;GO:0022857//transmembrane transporter activity;GO:0042910//xenobiotic transporter activity	GO:0006817//phosphate ion transport;GO:0006855//drug transmembrane transport;GO:0042493//response to drug;GO:0042908//xenobiotic transport;GO:0055085//transmembrane transport;GO:1902600//hydrogen ion transmembrane transport	--
TraesCS5A03G1045500	634	407	138	103	28.452	24.023	7.965	8.686	26.2375	8.3255	-1.65602	2.16778e-14	4.39005e-12	At2g30620	-	-	-	-	GO:0000786//nucleosome	GO:0003677//DNA binding	GO:0006334//nucleosome assembly	--
TraesCS3A03G0928400	1570	918	414	209	47.36	36.441	16.089	11.869	41.9005	13.979	-1.58371	2.31786e-14	4.6842e-12	At3g49140	-	-	-	-	-	-	-	--
TraesCS7B03G0743400	148	140	691	886	1.663	2.067	10.006	18.745	1.865	14.3755	2.94636	2.38016e-14	4.8001e-12	ABCG42	-	-	-	-	GO:0005575//cellular_component;GO:0005623//cell;GO:0005886//plasma membrane;GO:0005887//integral component of plasma membrane;GO:0009380//excinuclease repair complex;GO:0009898//cytoplasmic side of plasma membrane;GO:0016020//membrane;GO:0016021//integral component of membrane;GO:0031224//intrinsic component of membrane;GO:0043190//ATP-binding cassette (ABC) transporter complex;GO:0044425//membra…	GO:0000166//nucleotide binding;GO:0003674//molecular_function;GO:0003678//DNA helicase activity;GO:0003824//catalytic activity;GO:0003924//GTPase activity;GO:0005215//transporter activity;GO:0005260//channel-conductance-controlling ATPase activity;GO:0005319//lipid transporter activity;GO:0005488//binding;GO:0005524//ATP binding;GO:0005525//GTP binding;GO:0008144//drug binding;GO:0008565//protein…	GO:0000910//cytokinesis;GO:0006289//nucleotide-excision repair;GO:0006810//transport;GO:0006817//phosphate ion transport;GO:0006824//cobalt ion transport;GO:0006869//lipid transport;GO:0007601//visual perception;GO:0008150//biological_process;GO:0008272//sulfate transport;GO:0015675//nickel cation transport;GO:0015689//molybdate ion transport;GO:0015706//nitrate transport;GO:0015716//organic phos…	--
MSTRG.32769	333	286	1255	1229	5.844	6.601	28.324	40.528	6.2225	34.426	2.46793	2.45667e-14	4.94412e-12	RPPL1	-	-	-	-	-	-	-	--
TraesCS2A03G0454500	29	27	249	241	0.782	0.962	8.597	12.159	0.872	10.378	3.57306	2.53167e-14	5.08452e-12	PAL	Metabolism;Metabolism;Metabolism;Metabolism	Global and overview maps;Global and overview maps;Biosynthesis of other secondary metabolites;Amino acid metabolism	ko01100//Metabolic pathways;ko01110//Biosynthesis of secondary metabolites;ko00940//Phenylpropanoid biosynthesis;ko00360//Phenylalanine metabolism	K10775;K10775;K10775;K10775	-	GO:0004397//histidine ammonia-lyase activity;GO:0016841//ammonia-lyase activity;GO:0050368//tyrosine 2,3-aminomutase activity	GO:0006548//histidine catabolic process;GO:0009058//biosynthetic process;GO:0009698//phenylpropanoid metabolic process	--
TraesCS4B03G0112600	640	503	2130	2494	20.781	21.502	88.969	152.155	21.1415	120.562	2.51163	2.67495e-14	5.36117e-12	NPF8.3	-	-	-	-	GO:0016020//membrane	GO:0015333//peptide:proton symporter activity;GO:0022857//transmembrane transporter activity	GO:0015833//peptide transport;GO:0055085//transmembrane transport	--
TraesCS3A03G0092900	486	633	128	87	37.269	63.712	12.583	12.485	50.4905	12.534	-2.01017	2.69593e-14	5.39208e-12	BBBI	-	-	-	-	GO:0005576//extracellular region	GO:0004867//serine-type endopeptidase inhibitor activity	-	--
TraesCS6B03G0118400	1568	1220	524	297	82.204	84.111	35.326	29.256	83.1575	32.291	-1.36471	2.71386e-14	5.41677e-12	--	-	-	-	-	-	-	-	--
TraesCS5B03G1028600	19404	13874	5368	1735	923.824	868.756	328.715	155.264	896.29	241.989	-1.88902	2.74588e-14	5.46345e-12	PSAF	Metabolism;Metabolism	Global and overview maps;Energy metabolism	ko01100//Metabolic pathways;ko00195//Photosynthesis	K02694;K02694	GO:0005575//cellular_component;GO:0005622//intracellular;GO:0005623//cell;GO:0005737//cytoplasm;GO:0009507//chloroplast;GO:0009521//photosystem;GO:0009522//photosystem I;GO:0009534//chloroplast thylakoid;GO:0009536//plastid;GO:0009538//photosystem I reaction center;GO:0009543//chloroplast thylakoid lumen;GO:0009579//thylakoid;GO:0016020//membrane;GO:0031976//plastid thylakoid;GO:0031977//thylakoi…	-	GO:0008150//biological_process;GO:0008152//metabolic process;GO:0009987//cellular process;GO:0015979//photosynthesis;GO:0044237//cellular metabolic process	--
TraesCS3B03G0757500	72	46	362	366	3.437	2.888	22.221	32.799	3.1625	27.51	3.12082	2.75124e-14	5.46345e-12	rsca	Metabolism;Environmental Information Processing;Metabolism	Global and overview maps;Signal transduction;Carbohydrate metabolism	ko01100//Metabolic pathways;ko04016//MAPK signaling pathway - plant;ko00520//Amino sugar and nucleotide sugar metabolism	K20547;K20547;K20547	-	GO:0004568//chitinase activity;GO:0008061//chitin binding	GO:0006032//chitin catabolic process;GO:0016998//cell wall macromolecule catabolic process	--
TraesCS5A03G0229500	34	29	255	267	2.231	2.503	21.519	32.921	2.367	27.22	3.52354	2.75414e-14	5.46345e-12	--	-	-	-	-	-	-	GO:0006952//defense response	--
TraesCS6B03G0482900	5	11	150	208	0.318	0.859	11.227	22.849	0.5885	17.038	4.85557	2.86941e-14	5.6805e-12	PXG7	Metabolism	Lipid metabolism	ko00073//Cutin, suberine and wax biosynthesis	K17991	-	GO:0005509//calcium ion binding	-	--
TraesCS3B03G0838600	27	13	184	326	0.937	0.595	8.227	21.297	0.766	14.762	4.2684	2.93969e-14	5.80777e-12	GA2OX3	Metabolism;Metabolism	Global and overview maps;Metabolism of terpenoids and polyketides	ko01110//Biosynthesis of secondary metabolites;ko00904//Diterpenoid biosynthesis	K04125;K04125	-	GO:0016491//oxidoreductase activity	GO:0055114//oxidation-reduction process	--
TraesCS7D03G0406400	310	225	28	40	12.945	12.355	1.504	3.139	12.65	2.3215	-2.44601	3.13541e-14	6.18186e-12	PHI-1	-	-	-	-	-	-	-	--
TraesCS7B03G0460600	699	434	164	96	40.716	33.25	12.286	10.508	36.983	11.397	-1.69821	3.16745e-14	6.22961e-12	ATJ11	-	-	-	-	-	GO:0005515//protein binding	GO:0006457//protein folding;GO:0009408//response to heat	--
TraesCS5A03G0584700	24331	18047	7108	2416	1072.52	1046.31	402.987	200.146	1059.41	301.567	-1.81272	3.17248e-14	6.22961e-12	LHC	Metabolism;Metabolism	Global and overview maps;Energy metabolism	ko01100//Metabolic pathways;ko00196//Photosynthesis - antenna proteins	K08910;K08910	-	-	-	--
TraesCS5A03G0631700	95	59	429	427	2.085	1.702	12.106	17.602	1.8935	14.854	2.97172	3.2017e-14	6.27429e-12	CSLE6	-	-	-	-	GO:0016020//membrane	GO:0016760//cellulose synthase (UDP-forming) activity	GO:0030244//cellulose biosynthetic process	--
TraesCS2A03G0723800	220	134	777	966	4.283	3.419	19.417	35.281	3.851	27.349	2.82818	3.23796e-14	6.33256e-12	HAK1	-	-	-	-	GO:0016020//membrane	GO:0015079//potassium ion transmembrane transporter activity	GO:0006813//potassium ion transport;GO:0071805//potassium ion transmembrane transport	--
TraesCS4A03G1241700	13	8	140	240	0.223	0.181	3.088	7.763	0.202	5.4255	4.74733	3.31807e-14	6.47618e-12	--	-	-	-	-	-	GO:0004672//protein kinase activity;GO:0005515//protein binding;GO:0005524//ATP binding	GO:0006468//protein phosphorylation	--
TraesCS2D03G0214000	576	397	1794	1628	19.24	17.431	77.007	102.146	18.3355	89.5765	2.28848	3.37232e-14	6.56885e-12	NAC92	-	-	-	-	-	GO:0003677//DNA binding	GO:0006355//regulation of transcription, DNA-templated	NAC
TraesCS3A03G0081800	716	708	3261	2158	31.981	41.594	187.332	181.136	36.7875	184.234	2.32425	3.42231e-14	6.65287e-12	CLP	-	-	-	-	-	-	-	--
TraesCS5A03G1079500	22940	19226	7256	2568	1361.24	1500.47	553.752	286.34	1430.86	420.046	-1.76826	3.61224e-14	7.00803e-12	psaD	Metabolism;Metabolism	Global and overview maps;Energy metabolism	ko01100//Metabolic pathways;ko00195//Photosynthesis	K02692;K02692	GO:0005575//cellular_component;GO:0005622//intracellular;GO:0005623//cell;GO:0005737//cytoplasm;GO:0009507//chloroplast;GO:0009521//photosystem;GO:0009522//photosystem I;GO:0009534//chloroplast thylakoid;GO:0009535//chloroplast thylakoid membrane;GO:0009536//plastid;GO:0009538//photosystem I reaction center;GO:0009579//thylakoid;GO:0016020//membrane;GO:0031976//plastid thylakoid;GO:0031984//organ…	-	GO:0008150//biological_process;GO:0008152//metabolic process;GO:0009987//cellular process;GO:0015979//photosynthesis;GO:0044237//cellular metabolic process	--
TraesCS5A03G0792000	385	279	1280	1275	10.969	10.799	47.784	69.251	10.884	58.5175	2.42666	3.63362e-14	7.03545e-12	DTX40	-	-	-	-	GO:0016020//membrane	GO:0015238//drug transmembrane transporter activity;GO:0015297//antiporter activity;GO:0042910//xenobiotic transporter activity	GO:0006855//drug transmembrane transport;GO:0042493//response to drug;GO:0055085//transmembrane transport	--
TraesCS2D03G0683800	7762	5189	2261	860	388.688	341.736	145.586	80.956	365.212	113.271	-1.68896	3.73785e-14	7.22284e-12	BAS1	-	-	-	-	-	GO:0016209//antioxidant activity;GO:0016491//oxidoreductase activity;GO:0051920//peroxiredoxin activity	GO:0006979//response to oxidative stress;GO:0055114//oxidation-reduction process	--
TraesCS5B03G1051100	761	625	220	108	29.601	31.969	11.012	7.876	30.785	9.444	-1.70476	3.91386e-14	7.54791e-12	MTERF1	-	-	-	-	-	GO:0003690//double-stranded DNA binding;GO:0008270//zinc ion binding	GO:0006355//regulation of transcription, DNA-templated	--
TraesCS4D03G0237400	472	341	77	15	19.944	18.98	4.174	1.245	19.462	2.7095	-2.84456	3.97229e-14	7.6454e-12	CIPK14	-	-	-	-	-	GO:0004672//protein kinase activity;GO:0005524//ATP binding;GO:0016709//oxidoreductase activity, acting on paired donors, with incorporation or reduction of molecular oxygen, NAD(P)H as one donor, and incorporation of one atom of oxygen	GO:0006468//protein phosphorylation;GO:0006744//ubiquinone biosynthetic process;GO:0007165//signal transduction	--
TraesCS7D03G1182200	959	675	253	104	64.613	59.84	21.929	13.171	62.2265	17.55	-1.82606	3.99434e-14	7.67262e-12	RPL35	Genetic Information Processing	Translation	ko03010//Ribosome	K02916	GO:0000315//organellar large ribosomal subunit;GO:0005840//ribosome;GO:0022625//cytosolic large ribosomal subunit	GO:0003735//structural constituent of ribosome	GO:0006412//translation	--
TraesCS2B03G0913900	1077	692	3108	3252	22.984	19.761	83.844	128.137	21.3725	105.99	2.31011	4.14379e-14	7.94396e-12	maoI	Metabolism;Metabolism;Metabolism;Metabolism;Metabolism;Metabolism;Metabolism;Metabolism	Global and overview maps;Global and overview maps;Amino acid metabolism;Amino acid metabolism;Amino acid metabolism;Metabolism of other amino acids;Biosynthesis of other secondary metabolites;Biosynthesis of other secondary metabolites	ko01100//Metabolic pathways;ko01110//Biosynthesis of secondary metabolites;ko00260//Glycine, serine and threonine metabolism;ko00360//Phenylalanine metabolism;ko00350//Tyrosine metabolism;ko00410//beta-Alanine metabolism;ko00950//Isoquinoline alkaloid biosynthesis;ko00960//Tropane, piperidine and pyridine alkaloid biosynthesis	K00276;K00276;K00276;K00276;K00276;K00276;K00276;K00276	-	GO:0005507//copper ion binding;GO:0008131//primary amine oxidase activity;GO:0048038//quinone binding	GO:0009308//amine metabolic process;GO:0055114//oxidation-reduction process	--
TraesCS2D03G0430200	1097	724	292	128	48.873	42.457	16.756	10.716	45.665	13.736	-1.73313	4.23481e-14	8.10244e-12	OsI_26546	-	-	-	-	GO:0005737//cytoplasm	GO:0008135//translation factor activity, RNA binding	GO:0006412//translation	--
TraesCS7A03G0642100	42599	37856	13081	4183	2262.07	2643.9	893.343	417.449	2452.98	655.396	-1.9041	4.34377e-14	8.29456e-12	CAB1B	Metabolism;Metabolism	Global and overview maps;Energy metabolism	ko01100//Metabolic pathways;ko00196//Photosynthesis - antenna proteins	K08912;K08912	GO:0005575//cellular_component;GO:0005622//intracellular;GO:0005623//cell;GO:0005737//cytoplasm;GO:0009507//chloroplast;GO:0009521//photosystem;GO:0009522//photosystem I;GO:0009523//photosystem II;GO:0009526//plastid envelope;GO:0009532//plastid stroma;GO:0009534//chloroplast thylakoid;GO:0009535//chloroplast thylakoid membrane;GO:0009536//plastid;GO:0009570//chloroplast stroma;GO:0009579//thylak…	GO:0003674//molecular_function;GO:0003824//catalytic activity;GO:0005488//binding;GO:0016168//chlorophyll binding;GO:0031409//pigment binding;GO:0043167//ion binding;GO:0043168//anion binding;GO:0043169//cation binding;GO:0046537//2,3-bisphosphoglycerate-independent phosphoglycerate mutase activity;GO:0046872//metal ion binding;GO:0046906//tetrapyrrole binding;GO:0048037//cofactor binding;GO:0097…	GO:0006091//generation of precursor metabolites and energy;GO:0006464//cellular protein modification process;GO:0006807//nitrogen compound metabolic process;GO:0008150//biological_process;GO:0008152//metabolic process;GO:0009314//response to radiation;GO:0009416//response to light stimulus;GO:0009628//response to abiotic stimulus;GO:0009765//photosynthesis, light harvesting;GO:0009768//photosynth…	--
TraesCS3D03G0963300	250	80	1074	832	11.919	5.018	65.855	74.579	8.4685	70.217	3.05164	4.37118e-14	8.33049e-12	--	-	-	-	-	-	GO:0005515//protein binding	-	--
MSTRG.15947	5029	4230	1890	1396	284.494	314.756	137.512	148.444	299.625	142.978	-1.06736	4.46604e-14	8.49458e-12	TSJT1	-	-	-	-	GO:0005911//cell-cell junction;GO:0009536//plastid;GO:0016020//membrane	GO:0005488//binding	GO:0006950//response to stress;GO:0009746//response to hexose;GO:0009863//salicylic acid mediated signaling pathway;GO:0034285//response to disaccharide;GO:0042743//hydrogen peroxide metabolic process	--
TraesCS7A03G0613600	595	560	2236	2176	17.231	21.338	83.256	118.355	19.2845	100.805	2.38606	4.58594e-14	8.70556e-12	--	-	-	-	-	-	-	-	--
TraesCS1B03G0780000	442	463	2069	1535	21.061	29.017	126.793	137.447	25.039	132.12	2.3996	4.76689e-14	9.01764e-12	--	-	-	-	-	GO:0016020//membrane	-	-	--
TraesCS2D03G0064900	638	513	2093	2001	24.003	25.907	102.999	143.53	24.955	123.264	2.30436	4.76893e-14	9.01764e-12	B0616E02-H0507E05.7	Metabolism;Metabolism;Metabolism;Metabolism;Metabolism	Global and overview maps;Global and overview maps;Global and overview maps;Amino acid metabolism;Amino acid metabolism	ko01100//Metabolic pathways;ko01110//Biosynthesis of secondary metabolites;ko01230//Biosynthesis of amino acids;ko00330//Arginine and proline metabolism;ko00220//Arginine biosynthesis	K01476;K01476;K01476;K01476;K01476	GO:0005575//cellular_component;GO:0005622//intracellular;GO:0005623//cell;GO:0005737//cytoplasm;GO:0005739//mitochondrion;GO:0009507//chloroplast;GO:0009532//plastid stroma;GO:0009536//plastid;GO:0009570//chloroplast stroma;GO:0043226//organelle;GO:0043227//membrane-bounded organelle;GO:0043229//intracellular organelle;GO:0043231//intracellular membrane-bounded organelle;GO:0044422//organelle par…	GO:0003674//molecular_function;GO:0003824//catalytic activity;GO:0004053//arginase activity;GO:0005488//binding;GO:0008783//agmatinase activity;GO:0016787//hydrolase activity;GO:0016810//hydrolase activity, acting on carbon-nitrogen (but not peptide) bonds;GO:0016813//hydrolase activity, acting on carbon-nitrogen (but not peptide) bonds, in linear amidines;GO:0043167//ion binding;GO:0043169//cati…	GO:0000050//urea cycle;GO:0006082//organic acid metabolic process;GO:0006520//cellular amino acid metabolic process;GO:0006525//arginine metabolic process;GO:0006527//arginine catabolic process;GO:0006560//proline metabolic process;GO:0006570//tyrosine metabolic process;GO:0006576//cellular biogenic amine metabolic process;GO:0006591//ornithine metabolic process;GO:0006595//poly Amine metabolic p…	--
TraesCS1B03G0482200	3	2	136	178	0.14	0.132	7.662	14.6	0.136	11.131	6.35483	4.88163e-14	9.2128e-12	HIR1	-	-	-	-	GO:0030288//outer membrane-bounded periplasmic space	GO:0003674//molecular_function	GO:0006260//DNA replication;GO:0045861//negative regulation of proteolysis	--
TraesCS5D03G0980700	4	1	121	222	0.285	0.094	11.077	29.694	0.1895	20.3855	6.7492	5.05314e-14	9.51795e-12	PRMS	Environmental Information Processing;Organismal Systems;Environmental Information Processing	Signal transduction;Environmental adaptation;Signal transduction	ko04075//Plant hormone signal transduction;ko04626//Plant-pathogen interaction;ko04016//MAPK signaling pathway - plant	K13449;K13449;K13449	-	-	-	--
TraesCS5D03G0124800	46	36	381	219	6.516	6.707	69.408	58.294	6.6115	63.851	3.27166	5.30562e-14	9.97416e-12	WIR1A	-	-	-	-	-	-	-	--
TraesCS7A03G0087000	166	84	627	600	3.112	2.071	15.117	21.137	2.5915	18.127	2.80628	5.33089e-14	1.00023e-11	RPP13L3	-	-	-	-	-	GO:0005524//ATP binding;GO:0043531//ADP binding	-	--
MSTRG.45255	82	41	423	316	11.586	7.619	76.869	83.905	9.6025	80.387	3.06548	5.60828e-14	1.05024e-11	WIR1B	-	-	-	-	-	-	-	--
MSTRG.26440	5680	3495	1422	451	223.613	180.968	71.998	33.365	202.291	52.6815	-1.94106	5.71223e-14	1.06765e-11	--	-	-	-	-	-	-	-	--
TraesCS5B03G0462300	612	373	121	41	27.295	21.983	6.986	3.449	24.639	5.2175	-2.23951	5.9726e-14	1.11417e-11	FLU	-	-	-	-	-	GO:0005515//protein binding	-	--
TraesCS7B03G0393800	651	407	116	28	23.417	19.246	5.364	1.925	21.3315	3.6445	-2.54919	6.13656e-14	1.14255e-11	BGLU28	Metabolism;Metabolism;Metabolism;Metabolism;Metabolism	Global and overview maps;Global and overview maps;Biosynthesis of other secondary metabolites;Carbohydrate metabolism;Metabolism of other amino acids	ko01100//Metabolic pathways;ko01110//Biosynthesis of secondary metabolites;ko00940//Phenylpropanoid biosynthesis;ko00500//Starch and sucrose metabolism;ko00460//Cyanoamino acid metabolism	K01188;K01188;K01188;K01188;K01188	GO:0009341//beta-galactosidase complex	GO:0003674//molecular_function;GO:0003824//catalytic activity;GO:0004553//hydrolase activity, hydrolyzing O-glycosyl compounds;GO:0004565//beta-galactosidase activity;GO:0008422//beta-glucosidase activity;GO:0015926//glucosidase activity;GO:0016787//hydrolase activity;GO:0016798//hydrolase activity, acting on glycosyl bonds	GO:0005975//carbohydrate metabolic process;GO:0006012//galactose metabolic process;GO:0008150//biological_process;GO:0008152//metabolic process;GO:0044238//primary metabolic process;GO:0071704//organic substance metabolic process;GO:1901135//carbohydrate derivative metabolic process;GO:1901657//glycosyl compound metabolic process	--
TraesCS7A03G0281400	500	264	1600	1294	6.421	4.451	26.414	31.219	5.436	28.8165	2.40628	6.58954e-14	1.22454e-11	ABCC10	-	-	-	-	GO:0005575//cellular_component;GO:0005887//integral component of plasma membrane;GO:0009380//excinuclease repair complex;GO:0009898//cytoplasmic side of plasma membrane;GO:0016021//integral component of membrane;GO:0043190//ATP-binding cassette (ABC) transporter complex;GO:0055051//ATP-binding cassette (ABC) transporter complex, integrated substrate binding;GO:0055052//ATP-binding cassette (ABC) …	GO:0000166//nucleotide binding;GO:0003676//nucleic acid binding;GO:0003677//DNA binding;GO:0003924//GTPase activity;GO:0005260//channel-conductance-controlling ATPase activity;GO:0005319//lipid transporter activity;GO:0005524//ATP binding;GO:0005525//GTP binding;GO:0008565//protein transporter activity;GO:0009381//excinuclease ABC activity;GO:0015220//choline transmembrane transporter activity;GO…	GO:0000910//cytokinesis;GO:0006289//nucleotide-excision repair;GO:0006364//rRNA processing;GO:0006777//Mo-molybdopterin cofactor biosynthetic process;GO:0006810//transport;GO:0006817//phosphate ion transport;GO:0006824//cobalt ion transport;GO:0006855//drug transmembrane transport;GO:0006869//lipid transport;GO:0007601//visual perception;GO:0008033//tRNA processing;GO:0008150//biological_process;…	--
TraesCS2A03G1358800	364	263	67	23	28.084	26.637	6.647	3.334	27.3605	4.9905	-2.45484	6.63495e-14	1.23062e-11	RPS17	Genetic Information Processing	Translation	ko03010//Ribosome	K02961	GO:0005840//ribosome;GO:0022627//cytosolic small ribosomal subunit	GO:0003735//structural constituent of ribosome	GO:0006412//translation	--
TraesCS6D03G0615600	266	242	1086	1739	9.596	11.473	50.403	117.942	10.5345	84.1725	2.99823	6.79231e-14	1.25741e-11	Os06g0486900	Metabolism;Metabolism;Metabolism	Global and overview maps;Global and overview maps;Carbohydrate metabolism	ko01100//Metabolic pathways;ko01200//Carbon metabolism;ko00630//Glyoxylate and dicarboxylate metabolism	K00122;K00122;K00122	GO:0005737//cytoplasm	GO:0004617//phosphoglycerate dehydrogenase activity;GO:0008883//glutamyl-tRNA reductase activity;GO:0016616//oxidoreductase activity, acting on the CH-OH group of donors, NAD or NADP as acceptor;GO:0050661//NADP binding;GO:0051287//NAD binding	GO:0006564//L-serine biosynthetic process;GO:0006779//porphyrin-containing compound biosynthetic process;GO:0055114//oxidation-reduction process	--
TraesCS4A03G0822400	12	6	137	200	0.146	0.096	2.146	4.578	0.121	3.362	4.79624	7.15171e-14	1.32117e-11	ABCG48	-	-	-	-	GO:0005575//cellular_component;GO:0005887//integral component of plasma membrane;GO:0009380//excinuclease repair complex;GO:0009898//cytoplasmic side of plasma membrane;GO:0016020//membrane;GO:0016021//integral component of membrane;GO:0043190//ATP-binding cassette (ABC) transporter complex;GO:0055051//ATP-binding cassette (ABC) transporter complex, integrated substrate binding;GO:0055052//ATP-bi…	GO:0003674//molecular_function;GO:0003723//RNA binding;GO:0003724//RNA helicase activity;GO:0003924//GTPase activity;GO:0005319//lipid transporter activity;GO:0005524//ATP binding;GO:0005525//GTP binding;GO:0008565//protein transporter activity;GO:0009381//excinuclease ABC activity;GO:0015220//choline transmembrane transporter activity;GO:0015221//lipopolysaccharide transmembrane transporter acti…	GO:0000910//cytokinesis;GO:0002949//tRNA threonylcarbamoyladenosine modification;GO:0006289//nucleotide-excision repair;GO:0006810//transport;GO:0006817//phosphate ion transport;GO:0006824//cobalt ion transport;GO:0006869//lipid transport;GO:0007601//visual perception;GO:0008150//biological_process;GO:0008272//sulfate transport;GO:0015675//nickel cation transport;GO:0015689//molybdate ion transpo…	--
MSTRG.66155	1314	1572	447	196	74.434	117.069	32.558	20.858	95.7515	26.708	-1.84202	7.16397e-14	1.32117e-11	APS1	-	-	-	-	GO:0043231//intracellular membrane-bounded organelle	-	GO:0006796//phosphate-containing compound metabolic process	--
TraesCS3D03G0943500	424	228	65	23	12.846	9.096	2.536	1.311	10.971	1.9235	-2.51189	7.22318e-14	1.32956e-11	SPBC1711.16	-	-	-	-	-	GO:0005515//protein binding	-	--
TraesCS1D03G0528300	40	51	336	346	1.508	2.529	16.316	24.534	2.0185	20.425	3.33898	7.2568e-14	1.33322e-11	--	-	-	-	-	-	GO:0004416//hydroxyacylglutathione hydrolase activity	GO:0019243//methylglyoxal catabolic process to D-lactate via S-lactoyl-glutathione	--
TraesCS5D03G0552200	26296	19309	8190	3014	1313.27	1268.34	526.071	282.844	1290.81	404.457	-1.67421	7.28853e-14	1.33652e-11	LHC	Metabolism;Metabolism	Global and overview maps;Energy metabolism	ko01100//Metabolic pathways;ko00196//Photosynthesis - antenna proteins	K08910;K08910	-	-	-	--
TraesCS2A03G0741400	7973	5360	2540	1097	414.892	366.815	170.009	107.309	390.853	138.659	-1.49509	7.85598e-14	1.43785e-11	BAS1	-	-	-	-	-	GO:0016209//antioxidant activity;GO:0016491//oxidoreductase activity;GO:0051920//peroxiredoxin activity	GO:0006979//response to oxidative stress;GO:0055114//oxidation-reduction process	--
TraesCS5B03G1059200	297	251	1194	879	3.588	3.986	18.547	19.943	3.787	19.245	2.34536	8.33974e-14	1.52352e-11	Os03g0790900	Metabolism;Metabolism	Global and overview maps;Amino acid metabolism	ko01100//Metabolic pathways;ko00380//Tryptophan metabolism	K11817;K11817	-	GO:0004854//xanthine dehydrogenase activity;GO:0009055//electron carrier activity;GO:0016491//oxidoreductase activity;GO:0043546//molybdopterin cofactor binding;GO:0046872//metal ion binding;GO:0051536//iron-sulfur cluster binding	GO:0009115//xanthine catabolic process;GO:0046415//urate metabolic process;GO:0055114//oxidation-reduction process	--
TraesCS2D03G0041800	5	6	141	144	0.168	0.266	6.104	9.108	0.217	7.606	5.13137	8.3984e-14	1.53135e-11	CYP71Z18	-	-	-	-	-	GO:0005506//iron ion binding;GO:0016705//oxidoreductase activity, acting on paired donors, with incorporation or reduction of molecular oxygen;GO:0020037//heme binding	GO:0055114//oxidation-reduction process	--
TraesCS2D03G0438600	42520	32776	12661	4093	1622.48	1644.93	621.333	293.49	1633.71	457.411	-1.83659	8.60538e-14	1.56345e-11	LHCB4.1	Metabolism;Metabolism	Global and overview maps;Energy metabolism	ko01100//Metabolic pathways;ko00196//Photosynthesis - antenna proteins	K08915;K08915	GO:0005575//cellular_component;GO:0005622//intracellular;GO:0005623//cell;GO:0005737//cytoplasm;GO:0009503//thylakoid light-harvesting complex;GO:0009507//chloroplast;GO:0009521//photosystem;GO:0009522//photosystem I;GO:0009523//photosystem II;GO:0009534//chloroplast thylakoid;GO:0009535//chloroplast thylakoid membrane;GO:0009536//plastid;GO:0009579//thylakoid;GO:0016020//membrane;GO:0016021//int…	GO:0003674//molecular_function;GO:0005488//binding;GO:0016168//chlorophyll binding;GO:0043167//ion binding;GO:0043168//anion binding;GO:0043169//cation binding;GO:0046872//metal ion binding;GO:0046906//tetrapyrrole binding;GO:0048037//cofactor binding;GO:0097159//organic cyclic compound binding;GO:1901363//heterocyclic compound binding	GO:0006091//generation of precursor metabolites and energy;GO:0006464//cellular protein modification process;GO:0006807//nitrogen compound metabolic process;GO:0008150//biological_process;GO:0008152//metabolic process;GO:0009765//photosynthesis, light harvesting;GO:0009987//cellular process;GO:0015979//photosynthesis;GO:0018298//protein-chromophore linkage;GO:0019538//protein metabolic process;GO…	--
TraesCS2A03G1068000	133	74	507	715	1.512	1.107	7.419	15.297	1.3095	11.358	3.11662	8.60668e-14	1.56345e-11	ABCC9	-	-	-	-	GO:0005575//cellular_component;GO:0005737//cytoplasm;GO:0005887//integral component of plasma membrane;GO:0009380//excinuclease repair complex;GO:0009898//cytoplasmic side of plasma membrane;GO:0016021//integral component of membrane;GO:0043190//ATP-binding cassette (ABC) transporter complex;GO:0055051//ATP-binding cassette (ABC) transporter complex, integrated substrate binding;GO:0055052//ATP-b…	GO:0000166//nucleotide binding;GO:0000309//nicotinamide-nucleotide adenylyltransferase activity;GO:0003677//DNA binding;GO:0003924//GTPase activity;GO:0005260//channel-conductance-controlling ATPase activity;GO:0005319//lipid transporter activity;GO:0005524//ATP binding;GO:0005525//GTP binding;GO:0008565//protein transporter activity;GO:0009381//excinuclease ABC activity;GO:0015220//choline trans…	GO:0000910//cytokinesis;GO:0006289//nucleotide-excision repair;GO:0006400//tRNA modification;GO:0006810//transport;GO:0006817//phosphate ion transport;GO:0006824//cobalt ion transport;GO:0006855//drug transmembrane transport;GO:0006869//lipid transport;GO:0007601//visual perception;GO:0008150//biological_process;GO:0008272//sulfate transport;GO:0009435//NAD biosynthetic process;GO:0015675//nickel…	--
TraesCS5D03G1033100	24256	19843	7789	2756	1372.28	1476.5	566.706	293.034	1424.39	429.87	-1.72837	8.81173e-14	1.59771e-11	psaD	Metabolism;Metabolism	Global and overview maps;Energy metabolism	ko01100//Metabolic pathways;ko00195//Photosynthesis	K02692;K02692	GO:0005575//cellular_component;GO:0005622//intracellular;GO:0005623//cell;GO:0005737//cytoplasm;GO:0009507//chloroplast;GO:0009521//photosystem;GO:0009522//photosystem I;GO:0009534//chloroplast thylakoid;GO:0009535//chloroplast thylakoid membrane;GO:0009536//plastid;GO:0009538//photosystem I reaction center;GO:0009579//thylakoid;GO:0016020//membrane;GO:0031976//plastid thylakoid;GO:0031984//organ…	-	GO:0008150//biological_process;GO:0008152//metabolic process;GO:0009987//cellular process;GO:0015979//photosynthesis;GO:0044237//cellular metabolic process	--
TraesCS6B03G0932100	594	509	2059	2508	17.067	19.224	76.022	135.33	18.1455	105.676	2.54196	9.13078e-14	1.65247e-11	PYD1	Metabolism;Metabolism;Metabolism;Metabolism	Global and overview maps;Nucleotide metabolism;Metabolism of other amino acids;Metabolism of cofactors and vitamins	ko01100//Metabolic pathways;ko00240//Pyrimidine metabolism;ko00410//beta-Alanine metabolism;ko00770//Pantothenate and CoA biosynthesis	K00207;K00207;K00207;K00207	GO:0005737//cytoplasm	GO:0004152//dihydroorotate dehydrogenase activity;GO:0004452//isopentenyl-diphosphate delta-isomerase activity;GO:0015930//glutamate synthase activity;GO:0016627//oxidoreductase activity, acting on the CH-CH group of donors;GO:0016638//oxidoreductase activity, acting on the CH-NH2 group of donors;GO:0017150//tRNA dihydrouridine synthase activity;GO:0050660//flavin adenine dinucleotide binding	GO:0006537//glutamate biosynthetic process;GO:0008033//tRNA processing;GO:0008299//isoprenoid biosynthetic process;GO:0009220//pyrimidine ribonucleotide biosynthetic process;GO:0055114//oxidation-reduction process	--
TraesCS3D03G0225500	844	638	204	192	41.811	41.584	12.998	17.915	41.6975	15.4565	-1.43175	9.22072e-14	1.66564e-11	Os01g0192000	-	-	-	-	GO:0005575//cellular_component;GO:0005622//intracellular;GO:0005623//cell;GO:0005634//nucleus;GO:0043226//organelle;GO:0043227//membrane-bounded organelle;GO:0043229//intracellular organelle;GO:0043231//intracellular membrane-bounded organelle;GO:0044424//intracellular part;GO:0044464//cell part	GO:0003674//molecular_function;GO:0003676//nucleic acid binding;GO:0003677//DNA binding;GO:0005488//binding;GO:0008270//zinc ion binding;GO:0043167//ion binding;GO:0043169//cation binding;GO:0046872//metal ion binding;GO:0046914//transition metal ion binding;GO:0097159//organic cyclic compound binding;GO:1901363//heterocyclic compound binding	GO:0001101//response to acid chemical;GO:0007154//cell communication;GO:0007165//signal transduction;GO:0007275//multicellular organism development;GO:0007568//aging;GO:0008150//biological_process;GO:0009719//response to endogenous stimulus;GO:0009725//response to hormone;GO:0009753//response to jasmonic acid;GO:0009755//hormone-mediated signaling pathway;GO:0009867//jasmonic acid mediated signal…	C3H
TraesCS4B03G0683300	253	301	1288	1510	7.069	11.062	46.285	79.285	9.0655	62.785	2.79196	9.28055e-14	1.67333e-11	NRAMP2	-	-	-	-	GO:0005887//integral component of plasma membrane;GO:0016020//membrane	GO:0046873//metal ion transmembrane transporter activity	GO:0030001//metal ion transport	--
TraesCS3A03G0745700	853	772	3028	2521	43.341	51.637	197.941	240.815	47.489	219.378	2.20775	9.41166e-14	1.69382e-11	GST1	Metabolism;Metabolism	Global and overview maps;Metabolism of other amino acids	ko01100//Metabolic pathways;ko00480//Glutathione metabolism	K00799;K00799	-	GO:0005515//protein binding;GO:0016034//maleylacetoacetate isomerase activity	GO:0006559//L-phenylalanine catabolic process;GO:0006572//tyrosine catabolic process;GO:0006749//glutathione metabolic process	--
TraesCS5D03G0236900	281	168	37	14	13.932	10.92	2.489	1.304	12.426	1.8965	-2.71195	9.44622e-14	1.69689e-11	--	-	-	-	-	-	-	-	--
TraesCS3A03G0732000	8	5	122	192	0.275	0.226	5.386	12.385	0.2505	8.8855	5.14857	9.47975e-14	1.69977e-11	GA2OX3	Metabolism;Metabolism	Global and overview maps;Metabolism of terpenoids and polyketides	ko01110//Biosynthesis of secondary metabolites;ko00904//Diterpenoid biosynthesis	K04125;K04125	-	GO:0016491//oxidoreductase activity	GO:0055114//oxidation-reduction process	--
TraesCS3A03G1012500	1511	1016	455	219	118.812	105.062	46.018	32.366	111.937	39.192	-1.51406	1.00951e-13	1.80676e-11	RPL27	Genetic Information Processing	Translation	ko03010//Ribosome	K02899	GO:0000315//organellar large ribosomal subunit;GO:0005840//ribosome;GO:0022625//cytosolic large ribosomal subunit	GO:0003735//structural constituent of ribosome	GO:0006412//translation	--
TraesCS1A03G0657000	765	538	197	81	15.677	14.493	5.203	3.119	15.085	4.161	-1.85811	1.0249e-13	1.83094e-11	CLA1	Metabolism;Metabolism;Metabolism;Metabolism	Global and overview maps;Global and overview maps;Metabolism of terpenoids and polyketides;Metabolism of cofactors and vitamins	ko01100//Metabolic pathways;ko01110//Biosynthesis of secondary metabolites;ko00900//Terpenoid backbone biosynthesis;ko00730//Thiamine metabolism	K01662;K01662;K01662;K01662	GO:0005575//cellular_component;GO:0005622//intracellular;GO:0005623//cell;GO:0005737//cytoplasm;GO:0009507//chloroplast;GO:0009532//plastid stroma;GO:0009536//plastid;GO:0009570//chloroplast stroma;GO:0043226//organelle;GO:0043227//membrane-bounded organelle;GO:0043229//intracellular organelle;GO:0043231//intracellular membrane-bounded organelle;GO:0044422//organelle part;GO:0044424//intracellula…	GO:0003674//molecular_function;GO:0003824//catalytic activity;GO:0004739//pyruvate dehydrogenase (acetyl-transferring) activity;GO:0004802//transketolase activity;GO:0005488//binding;GO:0008661//1-deoxy-D-xylulose-5-phosphate synthase activity;GO:0016624//oxidoreductase activity, acting on the aldehyde or oxo group of donors, disulfide as acceptor;GO:0016740//transferase activity;GO:0016744//tran…	GO:0006086//acetyl-CoA biosynthetic process from pyruvate;GO:0006098//pentose-phosphate shunt;GO:0006629//lipid metabolic process;GO:0006720//isoprenoid metabolic process;GO:0006721//terpenoid metabolic process;GO:0006725//cellular aromatic compound metabolic process;GO:0006766//vitamin metabolic process;GO:0006767//water-soluble vitamin metabolic process;GO:0006772//thiamine metabolic process;GO…	--
TraesCS5A03G1004700	464	358	113	61	22.417	22.771	7.037	5.541	22.594	6.289	-1.84504	1.0876e-13	1.93936e-11	MTERF1	-	-	-	-	-	GO:0003690//double-stranded DNA binding;GO:0008270//zinc ion binding	GO:0006355//regulation of transcription, DNA-templated	--
TraesCS2B03G0817900	6883	4956	2158	829	349.235	330.722	140.831	79.074	339.978	109.953	-1.62856	1.11069e-13	1.97557e-11	BAS1	-	-	-	-	-	GO:0016209//antioxidant activity;GO:0016491//oxidoreductase activity;GO:0051920//peroxiredoxin activity	GO:0006979//response to oxidative stress;GO:0055114//oxidation-reduction process	--
TraesCS1B03G0586900	405	324	90	36	22.644	23.826	6.472	3.782	23.235	5.127	-2.18011	1.11198e-13	1.97557e-11	--	-	-	-	-	GO:0005737//cytoplasm	GO:0003677//DNA binding;GO:0004857//enzyme inhibitor activity	GO:0008156//negative regulation of DNA replication;GO:0043200//response to amino acid	--
TraesCS7A03G0322300	2857	3158	12087	10689	76.452	111.16	416.031	537.568	93.806	476.8	2.34563	1.12307e-13	1.99139e-11	PTC52	-	-	-	-	GO:0005575//cellular_component;GO:0005622//intracellular;GO:0005623//cell;GO:0005737//cytoplasm;GO:0009507//chloroplast;GO:0009526//plastid envelope;GO:0009528//plastid inner membrane;GO:0009536//plastid;GO:0009706//chloroplast inner membrane;GO:0009941//chloroplast envelope;GO:0016020//membrane;GO:0016021//integral component of membrane;GO:0019866//organelle inner membrane;GO:0031090//organelle …	GO:0003674//molecular_function;GO:0003824//catalytic activity;GO:0004497//monooxygenase activity;GO:0005488//binding;GO:0010277//chlorophyllide a oxygenase [overall] activity;GO:0016491//oxidoreductase activity;GO:0016701//oxidoreductase activity, acting on single donors with incorporation of molecular oxygen;GO:0016703//oxidoreductase activity, acting on single donors with incorporation of molec…	GO:0006810//transport;GO:0008104//protein localization;GO:0008150//biological_process;GO:0008152//metabolic process;GO:0015031//protein transport;GO:0015833//peptide transport;GO:0033036//macromolecule localization;GO:0042886//amide transport;GO:0045184//establishment of protein localization;GO:0051179//localization;GO:0051234//establishment of localization;GO:0055114//oxidation-reduction process…	--
TraesCS7A03G0756000	113	142	726	635	2.818	4.66	23.293	29.766	3.739	26.5295	2.82687	1.12499e-13	1.99139e-11	NDB2	-	-	-	-	-	GO:0004148//dihydrolipoyl dehydrogenase activity;GO:0004362//glutathione-disulfide reductase activity;GO:0005509//calcium ion binding;GO:0016152//mercury (II) reductase activity;GO:0016491//oxidoreductase activity;GO:0050451//CoA-disulfide reductase activity	GO:0006096//glycolytic process;GO:0045454//cell redox homeostasis;GO:0046689//response to mercury ion;GO:0051068//dihydrolipoamide metabolic process;GO:0055114//oxidation-reduction process	--
TraesCS2D03G0229100	435	307	2406	1057	18.642	17.304	132.612	85.125	17.973	108.868	2.59868	1.13643e-13	2.00799e-11	PRX112	Metabolism;Metabolism;Metabolism	Global and overview maps;Global and overview maps;Biosynthesis of other secondary metabolites	ko01100//Metabolic pathways;ko01110//Biosynthesis of secondary metabolites;ko00940//Phenylpropanoid biosynthesis	K00430;K00430;K00430	-	GO:0004601//peroxidase activity;GO:0020037//heme binding	GO:0006979//response to oxidative stress;GO:0055114//oxidation-reduction process	--
TraesCS1D03G0725300	922	618	2767	2137	15.12	13.335	58.359	65.865	14.2275	62.112	2.12619	1.15165e-13	2.03117e-11	At5g49770	-	-	-	-	GO:0005887//integral component of plasma membrane	GO:0004672//protein kinase activity;GO:0005515//protein binding;GO:0005524//ATP binding	GO:0006468//protein phosphorylation	--
TraesCS3B03G1073600	11	11	166	158	0.601	0.79	11.662	16.219	0.6955	13.9405	4.32509	1.18448e-13	2.08529e-11	At2g29170	Metabolism;Metabolism;Metabolism	Global and overview maps;Global and overview maps;Biosynthesis of other secondary metabolites	ko01100//Metabolic pathways;ko01110//Biosynthesis of secondary metabolites;ko00960//Tropane, piperidine and pyridine alkaloid biosynthesis	K08081;K08081;K08081	-	GO:0003824//catalytic activity;GO:0004316//3-oxoacyl-[acyl-carrier-protein] reductase (NADPH) activity;GO:0004488//methylenetetrahydrofolate dehydrogenase (NADP+) activity;GO:0004757//sepiapterin reductase activity;GO:0008667//2,3-dihydro-2,3-dihydroxybenzoate dehydrogenase activity;GO:0008678//2-deoxy-D-gluconate 3-dehydrogenase activity;GO:0016491//oxidoreductase activity;GO:0016655//oxidoreduc…	GO:0000272//polysaccharide catabolic process;GO:0005975//carbohydrate metabolic process;GO:0006633//fatty acid biosynthetic process;GO:0006729//tetrahydrobiopterin biosynthetic process;GO:0008152//metabolic process;GO:0030436//asexual sporulation;GO:0055114//oxidation-reduction process	--
TraesCS7A03G0351400	20	13	169	228	0.713	0.609	7.726	15.291	0.661	11.5085	4.12191	1.21736e-13	2.13929e-11	--	-	-	-	-	-	-	-	--
TraesCS2D03G0286600LC	168	216	22	3	14.358	24.224	2.422	0.483	19.291	1.4525	-3.73132	1.23568e-13	2.16756e-11	-	-	-	-	-	-	-	-	-
TraesCS2D03G0959100	184	106	12	6	19.272	14.603	1.617	1.181	16.9375	1.399	-3.59775	1.3027e-13	2.28099e-11	--	-	-	-	-	GO:0005576//extracellular region	GO:0008289//lipid binding	GO:0006869//lipid transport;GO:0042157//lipoprotein metabolic process	--
TraesCS5A03G0152500	228	186	853	939	7.098	7.587	34.124	54.847	7.3425	44.4855	2.59899	1.33695e-13	2.33676e-11	UAH	Metabolism;Metabolism	Global and overview maps;Nucleotide metabolism	ko01100//Metabolic pathways;ko00230//Purine metabolism	K18151;K18151	-	GO:0004180//carboxypeptidase activity;GO:0004222//metalloendopeptidase activity;GO:0008777//acetylornithine deacetylase activity;GO:0016787//hydrolase activity;GO:0047652//allantoate deiminase activity	GO:0006508//proteolysis;GO:0006592//ornithine biosynthetic process;GO:0009442//allantoin assimilation pathway	--
TraesCS5D03G0451000	7398	5332	2235	791	311.876	295.674	121.185	62.667	303.775	91.926	-1.72446	1.36317e-13	2.37828e-11	yeaD	Metabolism;Metabolism;Metabolism	Global and overview maps;Global and overview maps;Carbohydrate metabolism	ko01100//Metabolic pathways;ko01110//Biosynthesis of secondary metabolites;ko00010//Glycolysis / Gluconeogenesis	K01792;K01792;K01792	-	GO:0016853//isomerase activity	GO:0005975//carbohydrate metabolic process	--
TraesCS1A03G0502800	65	50	358	311	3.714	3.758	26.309	33.395	3.736	29.852	2.99826	1.49927e-13	2.61104e-11	GSTU6	Metabolism;Metabolism	Global and overview maps;Metabolism of other amino acids	ko01100//Metabolic pathways;ko00480//Glutathione metabolism	K00799;K00799	-	GO:0005515//protein binding;GO:0016034//maleylacetoacetate isomerase activity	GO:0006559//L-phenylalanine catabolic process;GO:0006572//tyrosine catabolic process;GO:0006749//glutathione metabolic process	--
TraesCS3A03G0377300	10314	7407	3229	1203	474.041	447.783	190.858	103.927	460.912	147.393	-1.64483	1.52363e-13	2.64872e-11	TPT	-	-	-	-	GO:0005575//cellular_component;GO:0005622//intracellular;GO:0005623//cell;GO:0005737//cytoplasm;GO:0009507//chloroplast;GO:0009526//plastid envelope;GO:0009536//plastid;GO:0009941//chloroplast envelope;GO:0016020//membrane;GO:0016021//integral component of membrane;GO:0031090//organelle membrane;GO:0031224//intrinsic component of membrane;GO:0031967//organelle envelope;GO:0031969//chloroplast mem…	GO:0003674//molecular_function;GO:0005215//transporter activity;GO:0022857//transmembrane transporter activity	GO:0006810//transport;GO:0008150//biological_process;GO:0008643//carbohydrate transport;GO:0051179//localization;GO:0051234//establishment of localization;GO:0055085//transmembrane transport;GO:0071702//organic substance transport	--
TraesCS7A03G1163900	1766	1120	508	223	65.449	54.584	24.213	15.552	60.0165	19.8825	-1.59386	1.57214e-13	2.72816e-11	CHLI	Metabolism;Metabolism;Metabolism	Global and overview maps;Global and overview maps;Metabolism of cofactors and vitamins	ko01100//Metabolic pathways;ko01110//Biosynthesis of secondary metabolites;ko00860//Porphyrin metabolism	K03405;K03405;K03405	GO:0005575//cellular_component;GO:0005622//intracellular;GO:0005623//cell;GO:0005737//cytoplasm;GO:0009507//chloroplast;GO:0009536//plastid;GO:0010007//magnesium chelatase complex;GO:0043226//organelle;GO:0043227//membrane-bounded organelle;GO:0043229//intracellular organelle;GO:0043231//intracellular membrane-bounded organelle;GO:0044424//intracellular part;GO:0044444//cytoplasmic part;GO:004446…	GO:0000166//nucleotide binding;GO:0003674//molecular_function;GO:0003677//DNA binding;GO:0003824//catalytic activity;GO:0004176//ATP-dependent peptidase activity;GO:0004252//serine-type endopeptidase activity;GO:0005488//binding;GO:0005524//ATP binding;GO:0008134//transcription factor binding;GO:0008144//drug binding;GO:0016851//magnesium chelatase activity;GO:0016874//ligase activity;GO:0016887/…	GO:0006355//regulation of transcription, DNA-templated;GO:0006508//proteolysis;GO:0006725//cellular aromatic compound metabolic process;GO:0006778//porphyrin-containing compound metabolic process;GO:0006779//porphyrin-containing compound biosynthetic process;GO:0006807//nitrogen compound metabolic process;GO:0008150//biological_process;GO:0008152//metabolic process;GO:0009058//biosynthetic proces…	--
TraesCS3A03G0869200	1505	873	419	235	32.523	24.809	11.643	9.542	28.666	10.5925	-1.4363	1.59619e-13	2.76189e-11	LAC7	-	-	-	-	GO:0005575//cellular_component;GO:0005576//extracellular region;GO:0048046//apoplast	GO:0003674//molecular_function;GO:0003824//catalytic activity;GO:0005375//copper ion transmembrane transporter activity;GO:0005488//binding;GO:0005507//copper ion binding;GO:0016491//oxidoreductase activity;GO:0016679//oxidoreductase activity, acting on diphenols and related substances as donors;GO:0016682//oxidoreductase activity, acting on diphenols and related substances as donors, oxygen as a…	GO:0006725//cellular aromatic compound metabolic process;GO:0006825//copper ion transport;GO:0008150//biological_process;GO:0008152//metabolic process;GO:0009056//catabolic process;GO:0009698//phenylpropanoid metabolic process;GO:0009808//lignin metabolic process;GO:0009987//cellular process;GO:0019439//aromatic compound catabolic process;GO:0019748//secondary metabolic process;GO:0044237//cellul…	--
TraesCS1D03G0954200	31970	29729	12912	6725	1439.28	1760.27	747.582	568.918	1599.78	658.25	-1.28116	1.59728e-13	2.76189e-11	WHAB1.6	Metabolism;Metabolism	Global and overview maps;Energy metabolism	ko01100//Metabolic pathways;ko00196//Photosynthesis - antenna proteins	K08912;K08912	-	-	-	--
TraesCS3B03G0055900	10	14	128	355	0.235	0.433	3.867	15.671	0.334	9.769	4.87029	1.60762e-13	2.7741e-11	CRK6	-	-	-	-	-	GO:0004672//protein kinase activity;GO:0005524//ATP binding	GO:0006468//protein phosphorylation	--
TraesCS5D03G0164200	76	38	333	462	3.869	2.26	20.194	42.526	3.0645	31.36	3.3552	1.61006e-13	2.7741e-11	LGALDH	Metabolism;Metabolism;Metabolism	Global and overview maps;Global and overview maps;Carbohydrate metabolism	ko01100//Metabolic pathways;ko01110//Biosynthesis of secondary metabolites;ko00053//Ascorbate and aldarate metabolism	K17744;K17744;K17744	-	GO:0047834//D-threo-aldose 1-dehydrogenase activity	-	--
TraesCS7D03G0650200	2231	1459	640	252	69.434	59.754	25.608	14.755	64.594	20.1815	-1.67837	1.6195e-13	2.78543e-11	CYP38	-	-	-	-	-	GO:0003755//peptidyl-prolyl cis-trans isomerase activity	GO:0000413//protein peptidyl-prolyl isomerization	--
TraesCS5D03G0513000	263	315	1535	1076	11.74	18.491	88.112	90.251	15.1155	89.1815	2.56072	1.62316e-13	2.78678e-11	TIFY10C	Environmental Information Processing	Signal transduction	ko04075//Plant hormone signal transduction	K13464	-	-	-	--
TraesCS6B03G0926000	302	315	1301	1632	15.831	21.717	87.687	160.806	18.774	124.246	2.7264	1.63541e-13	2.80285e-11	PXG5	Metabolism	Lipid metabolism	ko00073//Cutin, suberine and wax biosynthesis	K17991	-	GO:0005509//calcium ion binding	-	--
TraesCS5B03G0599300	22803	16631	7065	2494	1153.97	1106.97	459.854	237.215	1130.47	348.534	-1.69755	1.68575e-13	2.88402e-11	LHC	Metabolism;Metabolism	Global and overview maps;Energy metabolism	ko01100//Metabolic pathways;ko00196//Photosynthesis - antenna proteins	K08910;K08910	-	-	-	--
TraesCS2A03G0922900	120	70	463	667	2.507	1.924	12.442	26.19	2.2155	19.316	3.12409	1.78444e-13	3.0475e-11	PAL	Metabolism;Metabolism;Metabolism;Metabolism	Global and overview maps;Global and overview maps;Biosynthesis of other secondary metabolites;Amino acid metabolism	ko01100//Metabolic pathways;ko01110//Biosynthesis of secondary metabolites;ko00940//Phenylpropanoid biosynthesis;ko00360//Phenylalanine metabolism	K10775;K10775;K10775;K10775	GO:0005575//cellular_component;GO:0005622//intracellular;GO:0005623//cell;GO:0005737//cytoplasm;GO:0044424//intracellular part;GO:0044464//cell part	GO:0003674//molecular_function;GO:0003824//catalytic activity;GO:0004397//histidine ammonia-lyase activity;GO:0016829//lyase activity;GO:0016840//carbon-nitrogen lyase activity;GO:0016841//ammonia-lyase activity;GO:0045548//phenylalanine ammonia-lyase activity;GO:0050368//tyrosine 2,3-aminomutase activity	GO:0006082//organic acid metabolic process;GO:0006520//cellular amino acid metabolic process;GO:0006548//histidine catabolic process;GO:0006558//L-phenylalanine metabolic process;GO:0006559//L-phenylalanine catabolic process;GO:0006725//cellular aromatic compound metabolic process;GO:0006807//nitrogen compound metabolic process;GO:0008150//biological_process;GO:0008152//metabolic process;GO:00090…	--
TraesCS3B03G1074200	171	118	629	788	9.58	8.694	45.319	82.954	9.137	64.1365	2.81135	1.79475e-13	3.05971e-11	At5g06060	Metabolism;Metabolism;Metabolism	Global and overview maps;Global and overview maps;Biosynthesis of other secondary metabolites	ko01100//Metabolic pathways;ko01110//Biosynthesis of secondary metabolites;ko00960//Tropane, piperidine and pyridine alkaloid biosynthesis	K08081;K08081;K08081	-	GO:0003824//catalytic activity;GO:0004316//3-oxoacyl-[acyl-carrier-protein] reductase (NADPH) activity;GO:0004488//methylenetetrahydrofolate dehydrogenase (NADP+) activity;GO:0004757//sepiapterin reductase activity;GO:0008667//2,3-dihydro-2,3-dihydroxybenzoate dehydrogenase activity;GO:0008678//2-deoxy-D-gluconate 3-dehydrogenase activity;GO:0016491//oxidoreductase activity;GO:0016630//protochlor…	GO:0000272//polysaccharide catabolic process;GO:0005975//carbohydrate metabolic process;GO:0006633//fatty acid biosynthetic process;GO:0006729//tetrahydrobiopterin biosynthetic process;GO:0008152//metabolic process;GO:0015995//chlorophyll biosynthetic process;GO:0055114//oxidation-reduction process	--
TraesCS6B03G0506000	707	542	179	62	37.452	37.792	12.202	6.175	37.622	9.1885	-2.03368	1.80458e-13	3.07108e-11	PRXIIE-2	-	-	-	-	-	GO:0016209//antioxidant activity;GO:0016491//oxidoreductase activity;GO:0051920//peroxiredoxin activity	GO:0006979//response to oxidative stress;GO:0055114//oxidation-reduction process	--
TraesCS3D03G0906100	903	874	3327	2967	96.893	123.345	459.127	598.26	110.119	528.693	2.26337	1.8086e-13	3.07252e-11	--	-	-	-	-	-	-	-	--
TraesCS4D03G0585200	674	669	2708	2123	18.52	24.168	95.736	109.641	21.344	102.689	2.26637	1.82443e-13	3.09401e-11	MST4	-	-	-	-	GO:0005575//cellular_component;GO:0005623//cell;GO:0005886//plasma membrane;GO:0005887//integral component of plasma membrane;GO:0005911//cell-cell junction;GO:0009506//plasmodesma;GO:0016020//membrane;GO:0016021//integral component of membrane;GO:0030054//cell junction;GO:0031224//intrinsic component of membrane;GO:0044425//membrane part;GO:0044464//cell part;GO:0055044//symplast;GO:0071944//cel…	GO:0003674//molecular_function;GO:0005215//transporter activity;GO:0005351//sugar:proton symporter activity;GO:0005355//glucose transmembrane transporter activity;GO:0005356//hydrogen:glucose symporter activity;GO:0005358//high-affinity hydrogen:glucose symporter activity;GO:0005402//cation:sugar symporter activity;GO:0008028//monocarboxylic acid transmembrane transporter activity;GO:0008324//cat…	GO:0001101//response to acid chemical;GO:0006810//transport;GO:0006811//ion transport;GO:0006812//cation transport;GO:0006855//drug transmembrane transport;GO:0006950//response to stress;GO:0006970//response to osmotic stress;GO:0008150//biological_process;GO:0008643//carbohydrate transport;GO:0008645//hexose transport;GO:0009414//response to water deprivation;GO:0009415//response to water;GO:000…	--
TraesCS4D03G0523000	595	403	138	53	23.788	21.164	7.095	3.986	22.476	5.5405	-2.0203	1.8502e-13	3.13223e-11	RPL4	Genetic Information Processing	Translation	ko03010//Ribosome	K02926	GO:0005840//ribosome;GO:0022625//cytosolic large ribosomal subunit	GO:0003735//structural constituent of ribosome	GO:0006412//translation	--
TraesCS7D03G0615000	183	148	21	11	13.359	14.209	1.972	1.509	13.784	1.7405	-2.98542	1.87291e-13	3.16515e-11	ATJ11	-	-	-	-	-	GO:0005515//protein binding	GO:0006457//protein folding;GO:0009408//response to heat	--
TraesCS5D03G0980800	4	1	109	218	0.234	0.077	8.191	23.927	0.1555	16.059	6.69032	1.91439e-13	3.22963e-11	PRMS	Environmental Information Processing;Organismal Systems;Environmental Information Processing	Signal transduction;Environmental adaptation;Signal transduction	ko04075//Plant hormone signal transduction;ko04626//Plant-pathogen interaction;ko04016//MAPK signaling pathway - plant	K13449;K13449;K13449	-	-	-	--
TraesCS4A03G0110700	19	10	187	159	0.691	0.486	8.947	11.124	0.5885	10.0355	4.09193	1.9659e-13	3.31076e-11	sec61a	Genetic Information Processing;Cellular Processes;Genetic Information Processing	Folding, sorting and degradation;Transport and catabolism;Folding, sorting and degradation	ko04141//Protein processing in endoplasmic reticulum;ko04145//Phagosome;ko03060//Protein export	K10956;K10956;K10956	GO:0005887//integral component of plasma membrane;GO:0016020//membrane	GO:0015450//P-P-bond-hydrolysis-driven protein transmembrane transporter activity	GO:0015031//protein transport;GO:0043952//protein transport by the Sec complex	--
TraesCS5D03G1107700	232	161	809	756	9.251	8.459	41.557	56.721	8.855	49.139	2.4723	2.10524e-13	3.53929e-11	ephA	-	-	-	-	-	GO:0003674//molecular_function;GO:0003824//catalytic activity;GO:0008236//serine-type peptidase activity;GO:0016788//hydrolase activity, acting on ester bonds;GO:0047570//3-oxoadipate enol-lactonase activity;GO:0047746//chlorophyllase activity;GO:0070205//2-succinyl-6-hydroxy-2,4-cyclohexadiene-1-carboxylate synthase activity	GO:0006112//energy reserve metabolic process;GO:0006508//proteolysis;GO:0009102//biotin biosynthetic process;GO:0009234//menaquinone biosynthetic process;GO:0015979//photosynthesis;GO:0015996//chlorophyll catabolic process;GO:0030163//protein catabolic process;GO:0042952//beta-ketoadipate pathway	--
MSTRG.6028	183	193	847	985	6.293	8.729	37.46	63.641	7.511	50.5505	2.75065	2.22431e-13	3.73298e-11	Bx8	Metabolism	Biosynthesis of other secondary metabolites	ko00402//Benzoxazinoid biosynthesis	K13227	GO:0043231//intracellular membrane-bounded organelle	GO:0035251//UDP-glucosyltransferase activity	-	--
TraesCS4B03G0067400	4421	2766	1496	935	80.684	67.73	35.042	31.745	74.207	33.3935	-1.15199	2.25896e-13	3.7846e-11	VIP2	Environmental Information Processing	Signal transduction	ko04070//Phosphatidylinositol signaling system	K13024	-	GO:0016881//acid-amino acid ligase activity	-	--
TraesCS2D03G0768300	768	646	2486	2658	15.848	17.613	68.607	104.507	16.7305	86.557	2.37117	2.29659e-13	3.84101e-11	maoI	Metabolism;Metabolism;Metabolism;Metabolism;Metabolism;Metabolism;Metabolism;Metabolism	Global and overview maps;Global and overview maps;Amino acid metabolism;Amino acid metabolism;Amino acid metabolism;Metabolism of other amino acids;Biosynthesis of other secondary metabolites;Biosynthesis of other secondary metabolites	ko01100//Metabolic pathways;ko01110//Biosynthesis of secondary metabolites;ko00260//Glycine, serine and threonine metabolism;ko00360//Phenylalanine metabolism;ko00350//Tyrosine metabolism;ko00410//beta-Alanine metabolism;ko00950//Isoquinoline alkaloid biosynthesis;ko00960//Tropane, piperidine and pyridine alkaloid biosynthesis	K00276;K00276;K00276;K00276;K00276;K00276;K00276;K00276	-	GO:0005507//copper ion binding;GO:0008131//primary amine oxidase activity;GO:0048038//quinone binding	GO:0009308//amine metabolic process;GO:0055114//oxidation-reduction process	--
TraesCS3A03G0107800	33468	26777	11743	4730	2056.53	2164.03	928.05	546.172	2110.28	737.111	-1.51748	2.30902e-13	3.85514e-11	PSAL	Metabolism	Energy metabolism	ko00195//Photosynthesis	K02699	GO:0005575//cellular_component;GO:0005622//intracellular;GO:0005623//cell;GO:0005737//cytoplasm;GO:0009507//chloroplast;GO:0009521//photosystem;GO:0009522//photosystem I;GO:0009526//plastid envelope;GO:0009532//plastid stroma;GO:0009534//chloroplast thylakoid;GO:0009535//chloroplast thylakoid membrane;GO:0009536//plastid;GO:0009538//photosystem I reaction center;GO:0009570//chloroplast stroma;GO:…	GO:0003674//molecular_function;GO:0005488//binding;GO:0005515//protein binding;GO:0019904//protein domain specific binding	GO:0008150//biological_process;GO:0008152//metabolic process;GO:0009987//cellular process;GO:0015979//photosynthesis;GO:0044237//cellular metabolic process	--
TraesCS5D03G1185000	39	26	254	232	0.604	0.53	5.06	6.759	0.567	5.9095	3.38162	2.3265e-13	3.87766e-11	XA21	-	-	-	-	-	GO:0004672//protein kinase activity;GO:0005515//protein binding;GO:0005524//ATP binding	GO:0006468//protein phosphorylation	--
TraesCS5B03G1001700	18	15	154	286	0.773	0.847	8.504	23.085	0.81	15.7945	4.28536	2.3612e-13	3.92874e-11	PER50	Metabolism;Metabolism;Metabolism	Global and overview maps;Global and overview maps;Biosynthesis of other secondary metabolites	ko01100//Metabolic pathways;ko01110//Biosynthesis of secondary metabolites;ko00940//Phenylpropanoid biosynthesis	K00430;K00430;K00430	-	GO:0004096//catalase activity;GO:0004601//peroxidase activity;GO:0020037//heme binding	GO:0006979//response to oxidative stress;GO:0055114//oxidation-reduction process	--
TraesCS5D03G0127000	845	664	2642	2151	87.543	90.477	352.024	418.768	89.01	385.396	2.1143	2.45919e-13	4.08478e-11	WIR1A	-	-	-	-	-	-	-	--
TraesCS3D03G0317900	3276	2306	1160	619	57.582	53.295	26.23	20.441	55.4385	23.3355	-1.24836	2.5394e-13	4.2108e-11	PEPC	Metabolism;Metabolism;Metabolism;Metabolism	Global and overview maps;Global and overview maps;Carbohydrate metabolism;Energy metabolism	ko01100//Metabolic pathways;ko01200//Carbon metabolism;ko00620//Pyruvate metabolism;ko00710//Carbon fixation in photosynthetic organisms	K01595;K01595;K01595;K01595	-	GO:0008964//phosphoenolpyruvate carboxylase activity	GO:0006099//tricarboxylic acid cycle;GO:0015977//carbon fixation	--
TraesCS7A03G1184600	120	113	550	758	4.327	5.345	25.492	51.343	4.836	38.4175	2.98988	2.62715e-13	4.34887e-11	At5g10770	-	-	-	-	-	-	-	--
TraesCS5D03G0615200	75	50	342	434	1.918	1.697	11.242	20.849	1.8075	16.0455	3.1501	2.63354e-13	4.35203e-11	WAK5	-	-	-	-	GO:0016021//integral component of membrane	GO:0004672//protein kinase activity;GO:0004674//protein serine/threonine kinase activity;GO:0005509//calcium ion binding;GO:0005524//ATP binding;GO:0030247//polysaccharide binding	GO:0006468//protein phosphorylation	--
TraesCS5D03G0894200	45	66	2002	3782	1.669	3.232	95.522	263.584	2.4505	179.553	6.19519	2.81452e-13	4.6432e-11	OsI_14861	-	-	-	-	-	GO:0003825//alpha,alpha-trehalose-phosphate synthase (UDP-forming) activity;GO:0008234//cysteine-type peptidase activity	GO:0006508//proteolysis	--
TraesCS5B03G0547200	387	277	1225	1239	11.993	11.291	48.812	72.155	11.642	60.4835	2.3772	2.86521e-13	4.71879e-11	LTA2	Metabolism;Metabolism;Metabolism;Metabolism;Metabolism;Metabolism	Global and overview maps;Global and overview maps;Global and overview maps;Carbohydrate metabolism;Carbohydrate metabolism;Carbohydrate metabolism	ko01100//Metabolic pathways;ko01110//Biosynthesis of secondary metabolites;ko01200//Carbon metabolism;ko00010//Glycolysis / Gluconeogenesis;ko00620//Pyruvate metabolism;ko00020//Citrate cycle (TCA cycle)	K00627;K00627;K00627;K00627;K00627;K00627	GO:0005737//cytoplasm;GO:0045252//oxoglutarate dehydrogenase complex;GO:0045254//pyruvate dehydrogenase complex	GO:0004149//dihydrolipoyllysine-residue succinyltransferase activity;GO:0004736//pyruvate carboxylase activity;GO:0004738//pyruvate dehydrogenase activity;GO:0004742//dihydrolipoyllysine-residue acetyltransferase activity;GO:0004847//urea carboxylase activity;GO:0005215//transporter activity;GO:0008948//oxaloacetate decarboxylase activity;GO:0015081//sodium ion transmembrane transporter activity;…	GO:0006086//acetyl-CoA biosynthetic process from pyruvate;GO:0006094//gluconeogenesis;GO:0006099//tricarboxylic acid cycle;GO:0006554//lysine catabolic process;GO:0006810//transport;GO:0006814//sodium ion transport;GO:0019627//urea metabolic process	--
TraesCS4B03G0787300	2444	1352	701	393	111.611	81.206	41.172	33.726	96.4085	37.449	-1.36423	2.88639e-13	4.74562e-11	ERF073	-	-	-	-	-	GO:0003700//transcription factor activity, sequence-specific DNA binding	GO:0006355//regulation of transcription, DNA-templated	ERF
TraesCS2A03G0738500	21617	17789	6993	2355	1431.54	1549.4	595.612	293.096	1490.47	444.354	-1.74598	2.91102e-13	4.77801e-11	PSAO	Metabolism	Energy metabolism	ko00195//Photosynthesis	K14332	-	-	-	--
TraesCS5D03G1056200	48	29	261	293	1.217	0.967	8.509	13.957	1.092	11.233	3.3627	2.9864e-13	4.89345e-11	CRK6	-	-	-	-	-	GO:0004672//protein kinase activity;GO:0005524//ATP binding	GO:0006468//protein phosphorylation	--
TraesCS6B03G0985100	702	437	173	82	34.615	28.313	10.96	7.594	31.464	9.277	-1.76197	3.0008e-13	4.90876e-11	RPL29	Genetic Information Processing	Translation	ko03010//Ribosome	K02904	GO:0000315//organellar large ribosomal subunit;GO:0005840//ribosome;GO:0022625//cytosolic large ribosomal subunit	GO:0003735//structural constituent of ribosome	GO:0006412//translation	--
TraesCS3B03G0985900	311	147	987	1038	3.7	2.295	15.092	23.183	2.9975	19.1375	2.67457	3.09914e-13	5.0611e-11	ABCC3	Environmental Information Processing	Membrane transport	ko02010//ABC transporters	K05665	GO:0005575//cellular_component;GO:0005737//cytoplasm;GO:0005887//integral component of plasma membrane;GO:0009380//excinuclease repair complex;GO:0009898//cytoplasmic side of plasma membrane;GO:0016021//integral component of membrane;GO:0043190//ATP-binding cassette (ABC) transporter complex;GO:0055051//ATP-binding cassette (ABC) transporter complex, integrated substrate binding;GO:0055052//ATP-b…	GO:0000166//nucleotide binding;GO:0003677//DNA binding;GO:0003924//GTPase activity;GO:0004527//exonuclease activity;GO:0005260//channel-conductance-controlling ATPase activity;GO:0005319//lipid transporter activity;GO:0005524//ATP binding;GO:0005525//GTP binding;GO:0008565//protein transporter activity;GO:0009381//excinuclease ABC activity;GO:0015220//choline transmembrane transporter activity;GO…	GO:0000910//cytokinesis;GO:0006260//DNA replication;GO:0006289//nucleotide-excision repair;GO:0006310//DNA recombination;GO:0006810//transport;GO:0006817//phosphate ion transport;GO:0006824//cobalt ion transport;GO:0006855//drug transmembrane transport;GO:0006869//lipid transport;GO:0007601//visual perception;GO:0008150//biological_process;GO:0008272//sulfate transport;GO:0015675//nickel cation t…	--
TraesCS6B03G0942900LC	5660	3611	1643	599	212.575	178.348	79.357	42.299	195.462	60.828	-1.68408	3.14007e-13	5.11931e-11	ATPD	Metabolism;Metabolism;Metabolism	Global and overview maps;Energy metabolism;Energy metabolism	ko01100//Metabolic pathways;ko00190//Oxidative phosphorylation;ko00195//Photosynthesis	K02113;K02113;K02113	GO:0000275//mitochondrial proton-transporting ATP synthase complex, catalytic core F(1);GO:0005575//cellular_component;GO:0005622//intracellular;GO:0005623//cell;GO:0005737//cytoplasm;GO:0009507//chloroplast;GO:0009526//plastid envelope;GO:0009532//plastid stroma;GO:0009534//chloroplast thylakoid;GO:0009535//chloroplast thylakoid membrane;GO:0009536//plastid;GO:0009570//chloroplast stroma;GO:0009…	GO:0003674//molecular_function;GO:0003824//catalytic activity;GO:0005215//transporter activity;GO:0008324//cation transmembrane transporter activity;GO:0015075//ion transmembrane transporter activity;GO:0015077//monovalent inorganic cation transmembrane transporter activity;GO:0015078//hydrogen ion transmembrane transporter activity;GO:0015318//inorganic solute uptake transmembrane transporter ac…	GO:0006091//generation of precursor metabolites and energy;GO:0006139//nucleobase-containing compound metabolic process;GO:0006163//purine nucleotide metabolic process;GO:0006164//purine nucleotide biosynthetic process;GO:0006725//cellular aromatic compound metabolic process;GO:0006753//nucleoside phosphate metabolic process;GO:0006754//ATP biosynthetic process;GO:0006793//phosphorus metabolic pr…	--
TraesCS5D03G0682000	13	3	659	1214	0.31	0.094	20.243	54.483	0.202	37.363	7.53111	3.1581e-13	5.14007e-11	At1g54570	-	-	-	-	-	GO:0016747//transferase activity, transferring acyl groups other than amino-acyl groups;GO:0016787//hydrolase activity	GO:0009058//biosynthetic process	--
TraesCS2D03G0953600	274	330	63	31	31.598	50.053	9.344	6.718	40.8255	8.031	-2.34582	3.20558e-13	5.20862e-11	TPRP-F1	-	-	-	-	-	-	-	--
TraesCS7A03G1120400LC	14	10	149	184	0.224	0.211	3.07	5.54	0.2175	4.305	4.30693	3.29816e-13	5.35007e-11	--	-	-	-	-	-	-	-	--
TraesCS7D03G0069600	875	598	2493	2224	39.361	35.38	144.229	188	37.3705	166.114	2.15221	3.48152e-13	5.63808e-11	GSTU6	Metabolism;Metabolism	Global and overview maps;Metabolism of other amino acids	ko01100//Metabolic pathways;ko00480//Glutathione metabolism	K00799;K00799	-	GO:0005515//protein binding;GO:0016034//maleylacetoacetate isomerase activity	GO:0006559//L-phenylalanine catabolic process;GO:0006572//tyrosine catabolic process;GO:0006749//glutathione metabolic process	--
TraesCS7D03G0945900	842	542	228	156	61.119	51.773	21.336	21.291	56.446	21.3135	-1.4051	3.50134e-13	5.66074e-11	--	-	-	-	-	-	-	-	--
TraesCS2A03G0433700	49673	38483	15264	4832	2095.74	2135.45	828.225	383.097	2115.59	605.661	-1.80448	3.51541e-13	5.67403e-11	LHCB4.1	Metabolism;Metabolism	Global and overview maps;Energy metabolism	ko01100//Metabolic pathways;ko00196//Photosynthesis - antenna proteins	K08915;K08915	GO:0005575//cellular_component;GO:0005622//intracellular;GO:0005623//cell;GO:0005737//cytoplasm;GO:0009503//thylakoid light-harvesting complex;GO:0009507//chloroplast;GO:0009521//photosystem;GO:0009522//photosystem I;GO:0009523//photosystem II;GO:0009534//chloroplast thylakoid;GO:0009535//chloroplast thylakoid membrane;GO:0009536//plastid;GO:0009579//thylakoid;GO:0016020//membrane;GO:0016021//int…	GO:0003674//molecular_function;GO:0005488//binding;GO:0016168//chlorophyll binding;GO:0043167//ion binding;GO:0043168//anion binding;GO:0043169//cation binding;GO:0046872//metal ion binding;GO:0046906//tetrapyrrole binding;GO:0048037//cofactor binding;GO:0097159//organic cyclic compound binding;GO:1901363//heterocyclic compound binding	GO:0006091//generation of precursor metabolites and energy;GO:0006464//cellular protein modification process;GO:0006807//nitrogen compound metabolic process;GO:0008150//biological_process;GO:0008152//metabolic process;GO:0009765//photosynthesis, light harvesting;GO:0009987//cellular process;GO:0015979//photosynthesis;GO:0018298//protein-chromophore linkage;GO:0019538//protein metabolic process;GO…	--
TraesCS3D03G0734800	506	286	83	20	37.661	27.988	7.925	2.797	32.8245	5.361	-2.6142	3.64221e-13	5.86891e-11	RPL34	Genetic Information Processing	Translation	ko03010//Ribosome	K02914	GO:0000315//organellar large ribosomal subunit;GO:0005840//ribosome;GO:0022625//cytosolic large ribosomal subunit	GO:0003735//structural constituent of ribosome;GO:0050524//coenzyme-B sulfoethylthiotransferase activity	GO:0006412//translation	--
TraesCS5D03G0494200	253	186	1030	666	10.009	9.678	52.386	49.51	9.8435	50.948	2.37178	3.69693e-13	5.94721e-11	CAD8A	Metabolism;Metabolism;Metabolism	Global and overview maps;Global and overview maps;Biosynthesis of other secondary metabolites	ko01100//Metabolic pathways;ko01110//Biosynthesis of secondary metabolites;ko00940//Phenylpropanoid biosynthesis	K00083;K00083;K00083	-	GO:0004024//alcohol dehydrogenase activity, zinc-dependent;GO:0004617//phosphoglycerate dehydrogenase activity;GO:0008270//zinc ion binding;GO:0008743//L-threonine 3-dehydrogenase activity;GO:0016491//oxidoreductase activity;GO:0016655//oxidoreductase activity, acting on NAD(P)H, quinone or similar compound as acceptor;GO:0018467//formaldehyde dehydrogenase activity;GO:0050607//mycothiol-dependen…	GO:0006113//fermentation;GO:0006564//L-serine biosynthetic process;GO:0006567//threonine catabolic process;GO:0008152//metabolic process;GO:0009404//toxin metabolic process;GO:0010127//mycothiol-dependent detoxification;GO:0019439//aromatic compound catabolic process;GO:0030494//bacteriochlorophyll biosynthetic process;GO:0046292//formaldehyde metabolic process;GO:0055114//oxidation-reduction pro…	--
TraesCS2B03G1512800	258	145	25	23	18.273	13.489	2.315	3.061	15.881	2.688	-2.5627	3.81672e-13	6.12976e-11	CSA	Metabolism;Metabolism;Metabolism	Global and overview maps;Metabolism of other amino acids;Lipid metabolism	ko01100//Metabolic pathways;ko00480//Glutathione metabolism;ko00590//Arachidonic acid metabolism	K00432;K00432;K00432	-	GO:0004602//glutathione peroxidase activity;GO:0016209//antioxidant activity;GO:0016491//oxidoreductase activity	GO:0006979//response to oxidative stress;GO:0055114//oxidation-reduction process	--
TraesCS7D03G0405400	779	433	141	34	69.591	50.876	16.144	5.708	60.2335	10.926	-2.4628	3.86271e-13	6.19337e-11	GER5	-	-	-	-	GO:0005575//cellular_component;GO:0005576//extracellular region;GO:0005618//cell wall;GO:0005623//cell;GO:0030312//external encapsulating structure;GO:0031012//extracellular matrix;GO:0044421//extracellular region part;GO:0044464//cell part;GO:0048046//apoplast;GO:0071944//cell periphery	GO:0003674//molecular_function;GO:0005488//binding;GO:0030145//manganese ion binding;GO:0043167//ion binding;GO:0043169//cation binding;GO:0045735//nutrient reservoir activity;GO:0046872//metal ion binding;GO:0046914//transition metal ion binding	-	--
TraesCS5B03G0777900	1832	1591	546	170	177.563	202.838	68.111	30.95	190.201	49.5305	-1.94113	3.93211e-13	6.29275e-11	--	-	-	-	-	-	-	-	--
TraesCS3D03G1053700	68	58	341	487	2.916	3.25	18.798	39.25	3.083	29.024	3.23484	3.93767e-13	6.29275e-11	BANGLUC	-	-	-	-	-	GO:0004553//hydrolase activity, hydrolyzing O-glycosyl compounds	GO:0005975//carbohydrate metabolic process	--
TraesCS4A03G0754900	216	232	984	1027	4.136	5.848	24.281	37.038	4.992	30.6595	2.61864	4.0166e-13	6.40832e-11	Os12g0623900	Metabolism;Metabolism;Metabolism;Metabolism;Metabolism	Global and overview maps;Global and overview maps;Global and overview maps;Amino acid metabolism;Metabolism of other amino acids	ko01100//Metabolic pathways;ko01110//Biosynthesis of secondary metabolites;ko01230//Biosynthesis of amino acids;ko00270//Cysteine and methionine metabolism;ko00450//Selenocompound metabolism	K00549;K00549;K00549;K00549;K00549	-	GO:0003871//5-methyltetrahydropteroyltriglutamate-homocysteine S-methyltransferase activity;GO:0004357//glutamate-cysteine ligase activity;GO:0008270//zinc ion binding	GO:0006750//glutathione biosynthetic process;GO:0008652//cellular amino acid biosynthetic process;GO:0009086//methionine biosynthetic process	--
TraesCS5D03G1199700	201	117	15	13	4.359	3.338	0.418	0.53	3.8485	0.474	-3.02134	4.14071e-13	6.59549e-11	--	-	-	-	-	GO:0030288//outer membrane-bounded periplasmic space	GO:0003723//RNA binding;GO:0005215//transporter activity;GO:0009982//pseudouridine synthase activity	GO:0001522//pseudouridine synthesis;GO:0006810//transport;GO:0009405//pathogenesis;GO:0009451//RNA modification	--
TraesCS7D03G1126500	66	83	444	469	2.105	3.481	18.21	28.106	2.793	23.158	3.05162	4.23752e-13	6.73862e-11	At5g10770	-	-	-	-	-	-	-	--
TraesCS4A03G0846700	1073	729	268	84	36.624	32.743	11.79	5.383	34.6835	8.5865	-2.01411	4.25234e-13	6.75114e-11	rpsA	-	-	-	-	GO:0000314//organellar small ribosomal subunit;GO:0022627//cytosolic small ribosomal subunit	GO:0003676//nucleic acid binding;GO:0003735//structural constituent of ribosome;GO:0004654//polyribonucleotide nucleotidyltransferase activity;GO:0008997//ribonuclease R activity	GO:0006401//RNA catabolic process;GO:0006402//mRNA catabolic process;GO:0006412//translation	--
TraesCS3B03G0992200	1826	1037	522	345	46.448	34.616	17.038	16.436	40.532	16.737	-1.27602	4.32794e-13	6.85993e-11	LAC7	-	-	-	-	-	GO:0005375//copper ion transmembrane transporter activity;GO:0005507//copper ion binding;GO:0016491//oxidoreductase activity	GO:0006825//copper ion transport;GO:0055114//oxidation-reduction process	--
TraesCS4D03G0482600	365	366	1489	1302	9.958	13.104	52.164	66.692	11.531	59.428	2.36563	4.34712e-13	6.87908e-11	FAD7	-	-	-	-	GO:0005575//cellular_component;GO:0005622//intracellular;GO:0005623//cell;GO:0005737//cytoplasm;GO:0009507//chloroplast;GO:0009526//plastid envelope;GO:0009536//plastid;GO:0009941//chloroplast envelope;GO:0016020//membrane;GO:0031090//organelle membrane;GO:0031967//organelle envelope;GO:0031969//chloroplast membrane;GO:0031975//envelope;GO:0042170//plastid membrane;GO:0043226//organelle;GO:004322…	GO:0003674//molecular_function;GO:0003824//catalytic activity;GO:0016491//oxidoreductase activity;GO:0016705//oxidoreductase activity, acting on paired donors, with incorporation or reduction of molecular oxygen;GO:0016717//oxidoreductase activity, acting on paired donors, with oxidation of a pair of donors resulting in the reduction of molecular oxygen to two molecules of water	GO:0006082//organic acid metabolic process;GO:0006629//lipid metabolic process;GO:0006631//fatty acid metabolic process;GO:0006633//fatty acid biosynthetic process;GO:0006636//unsaturated fatty acid biosynthetic process;GO:0008150//biological_process;GO:0008152//metabolic process;GO:0008610//lipid biosynthetic process;GO:0009058//biosynthetic process;GO:0009987//cellular process;GO:0016053//organ…	--
TraesCS5B03G0598900	9	10	602	1539	0.257	0.376	22.143	82.711	0.3165	52.427	7.37196	4.54866e-13	7.18241e-11	At4g32940	-	-	-	-	-	GO:0008233//peptidase activity	GO:0006508//proteolysis	--
TraesCS1B03G0692400	8	1	114	182	0.274	0.053	5.284	12.325	0.1635	8.8045	5.75088	4.55361e-13	7.18241e-11	CSE	Metabolism;Metabolism	Global and overview maps;Lipid metabolism	ko01100//Metabolic pathways;ko00561//Glycerolipid metabolism	K01054;K01054	-	GO:0003824//catalytic activity;GO:0008236//serine-type peptidase activity;GO:0016787//hydrolase activity;GO:0047570//3-oxoadipate enol-lactonase activity;GO:0070205//2-succinyl-6-hydroxy-2,4-cyclohexadiene-1-carboxylate synthase activity	GO:0006508//proteolysis;GO:0009102//biotin biosynthetic process;GO:0009234//menaquinone biosynthetic process;GO:0042952//beta-ketoadipate pathway	--
TraesCS1B03G0741000	2195	1386	5981	7741	38.471	31.197	136.308	260.954	34.834	198.631	2.51152	4.57041e-13	7.1972e-11	PPDK1	Metabolism;Metabolism;Metabolism;Metabolism	Global and overview maps;Global and overview maps;Carbohydrate metabolism;Energy metabolism	ko01100//Metabolic pathways;ko01200//Carbon metabolism;ko00620//Pyruvate metabolism;ko00710//Carbon fixation in photosynthetic organisms	K01006;K01006;K01006;K01006	GO:0005575//cellular_component;GO:0005622//intracellular;GO:0005623//cell;GO:0005634//nucleus;GO:0005737//cytoplasm;GO:0005829//cytosol;GO:0009507//chloroplast;GO:0009532//plastid stroma;GO:0009536//plastid;GO:0009570//chloroplast stroma;GO:0043226//organelle;GO:0043227//membrane-bounded organelle;GO:0043229//intracellular organelle;GO:0043231//intracellular membrane-bounded organelle;GO:0044422/…	GO:0000166//nucleotide binding;GO:0003674//molecular_function;GO:0003824//catalytic activity;GO:0005488//binding;GO:0005524//ATP binding;GO:0008144//drug binding;GO:0008965//phosphoenolpyruvate-protein phosphotransferase activity;GO:0008986//pyruvate, water dikinase activity;GO:0016301//kinase activity;GO:0016740//transferase activity;GO:0016772//transferase activity, transferring phosphorus-cont…	GO:0006082//organic acid metabolic process;GO:0006090//pyruvate metabolic process;GO:0006094//gluconeogenesis;GO:0006793//phosphorus metabolic process;GO:0006796//phosphate-containing compound metabolic process;GO:0006808//regulation of nitrogen utilization;GO:0008150//biological_process;GO:0008152//metabolic process;GO:0009401//phosphoenolpyruvate-dependent sugar phosphotransferase system;GO:000…	--
TraesCS5A03G0236500	138	92	533	504	3.704	3.238	18.345	25.348	3.471	21.8465	2.65398	4.67359e-13	7.34776e-11	C bp60C	-	-	-	-	-	GO:0005516//calmodulin binding	-	--
TraesCS2A03G1018500	382	255	77	33	26.241	23.039	6.803	4.26	24.64	5.5315	-2.15526	4.70006e-13	7.37742e-11	--	-	-	-	-	GO:0005576//extracellular region	GO:0008289//lipid binding	GO:0006869//lipid transport;GO:0042157//lipoprotein metabolic process	--
TraesCS6B03G0042600	40	20	230	255	1.45	0.953	10.721	17.368	1.2015	14.0445	3.5471	4.85836e-13	7.61358e-11	CYP709B2	-	-	-	-	-	GO:0005506//iron ion binding;GO:0009982//pseudouridine synthase activity;GO:0016705//oxidoreductase activity, acting on paired donors, with incorporation or reduction of molecular oxygen;GO:0020037//heme binding	GO:0001522//pseudouridine synthesis;GO:0055114//oxidation-reduction process	--
TraesCS7A03G1159700	130	114	556	616	7.878	9.086	43.333	70.148	8.482	56.7405	2.7419	4.96565e-13	7.76916e-11	--	-	-	-	-	-	-	-	--
TraesCS4A03G1005700	97	119	612	523	2.778	4.492	22.544	28.13	3.635	25.337	2.80122	4.98923e-13	7.79349e-11	DTX27	-	-	-	-	GO:0016020//membrane	GO:0015238//drug transmembrane transporter activity;GO:0015297//antiporter activity;GO:0042910//xenobiotic transporter activity	GO:0006855//drug transmembrane transport;GO:0042493//response to drug;GO:0055085//transmembrane transport	--
TraesCS7A03G0548600	265	203	915	1258	8.547	8.625	38.034	76.367	8.586	57.2005	2.73597	5.19671e-13	8.10453e-11	At1g55760	-	-	-	-	GO:0000151//ubiquitin ligase complex;GO:0005575//cellular_component;GO:0005622//intracellular;GO:0005623//cell;GO:0005737//cytoplasm;GO:0019005//SCF ubiquitin ligase complex;GO:0031461//cullin-RING ubiquitin ligase complex;GO:0032991//macromolecular complex;GO:0044424//intracellular part;GO:0044464//cell part;GO:1902494//catalytic complex;GO:1990234//transferase complex	GO:0003674//molecular_function;GO:0005488//binding;GO:0005515//protein binding;GO:0019899//enzyme binding;GO:0031625//ubiquitin protein ligase binding;GO:0044389//ubiquitin-like protein ligase binding	GO:0006464//cellular protein modification process;GO:0006508//proteolysis;GO:0006511//ubiquitin-dependent protein catabolic process;GO:0006807//nitrogen compound metabolic process;GO:0008150//biological_process;GO:0008152//metabolic process;GO:0009056//catabolic process;GO:0009057//macromolecule catabolic process;GO:0009987//cellular process;GO:0010498//proteasomal protein catabolic process;GO:00…	--
TraesCS7D03G1108100	395	354	89	26	14.146	16.651	4.103	1.75	15.3985	2.9265	-2.39554	5.29966e-13	8.25182e-11	UPS1	-	-	-	-	GO:0016021//integral component of membrane	GO:0015144//carbohydrate transmembrane transporter activity	GO:0034219//carbohydrate transmembrane transport;GO:0071705//nitrogen compound transport	--
TraesCS5A03G0404200	2332	1456	702	306	72.153	55.185	27.286	17.988	63.669	22.637	-1.49191	5.36382e-13	8.33833e-11	--	-	-	-	-	-	GO:0003674//molecular_function;GO:0003824//catalytic activity;GO:0016787//hydrolase activity;GO:0047570//3-oxoadipate enol-lactonase activity;GO:0070205//2-succinyl-6-hydroxy-2,4-cyclohexadiene-1-carboxylate synthase activity	GO:0009102//biotin biosynthetic process;GO:0009234//menaquinone biosynthetic process;GO:0015979//photosynthesis;GO:0042952//beta-ketoadipate pathway	--
TraesCS1D03G0373400	558	496	1933	1670	14.857	17.37	66.185	83.537	16.1135	74.861	2.21594	5.3785e-13	8.34777e-11	NPF5.2	-	-	-	-	GO:0016020//membrane	GO:0015333//peptide:proton symporter activity;GO:0022857//transmembrane transporter activity	GO:0015833//peptide transport;GO:0055085//transmembrane transport	--
TraesCS7B03G0737900	2462	1824	915	591	86.328	84.119	41.263	38.942	85.2235	40.1025	-1.08756	5.3947e-13	8.34942e-11	Os06g0561000	Metabolism;Metabolism;Metabolism	Global and overview maps;Carbohydrate metabolism;Carbohydrate metabolism	ko01100//Metabolic pathways;ko00562//Inositol phosphate metabolism;ko00053//Ascorbate and aldarate metabolism	K00469;K00469;K00469	GO:0005737//cytoplasm	GO:0004521//endoribonuclease activity;GO:0005506//iron ion binding;GO:0050113//inositol oxygenase activity	GO:0019310//inositol catabolic process;GO:0043571//maintenance of CRISPR repeat elements;GO:0055114//oxidation-reduction process	--
TraesCS2D03G1339300	38	20	245	209	1.328	0.92	11.015	13.729	1.124	12.372	3.46036	5.39677e-13	8.34942e-11	TBT1	Metabolism;Metabolism;Metabolism;Metabolism;Metabolism	Global and overview maps;Global and overview maps;Biosynthesis of other secondary metabolites;Biosynthesis of other secondary metabolites;Biosynthesis of other secondary metabolites	ko01100//Metabolic pathways;ko01110//Biosynthesis of secondary metabolites;ko00940//Phenylpropanoid biosynthesis;ko00941//Flavonoid biosynthesis;ko00945//Stilbenoid, diarylheptanoid and gingerol biosynthesis	K13065;K13065;K13065;K13065;K13065	-	GO:0016747//transferase activity, transferring acyl groups other than amino-acyl groups	-	--
TraesCS5A03G0549300	177	198	948	715	7.535	11.086	51.9	57.195	9.3105	54.5475	2.55058	5.43609e-13	8.39685e-11	TIFY10C	Environmental Information Processing	Signal transduction	ko04075//Plant hormone signal transduction	K13464	GO:0005575//cellular_component;GO:0005622//intracellular;GO:0005623//cell;GO:0005634//nucleus;GO:0005737//cytoplasm;GO:0005829//cytosol;GO:0043226//organelle;GO:0043227//membrane-bounded organelle;GO:0043229//intracellular organelle;GO:0043231//intracellular membrane-bounded organelle;GO:0044424//intracellular part;GO:0044444//cytoplasmic part;GO:0044464//cell part	GO:0003674//molecular_function;GO:0003712//transcription cofactor activity;GO:0003714//transcription corepressor activity	GO:0006139//nucleobase-containing compound metabolic process;GO:0006351//transcription, DNA-templated;GO:0006355//regulation of transcription, DNA-templated;GO:0006725//cellular aromatic compound metabolic process;GO:0006807//nitrogen compound metabolic process;GO:0006950//response to stress;GO:0006952//defense response;GO:0008150//biological_process;GO:0008152//metabolic process;GO:0009058//bios…	--
TraesCS5D03G0148700	1631	1084	475	187	98.108	85.76	36.747	21.138	91.934	28.9425	-1.66741	5.50688e-13	8.49267e-11	RMA1H1	Genetic Information Processing	Folding, sorting and degradation	ko04141//Protein processing in endoplasmic reticulum	K10666	GO:0000109//nucleotide-excision repair complex;GO:0005575//cellular_component;GO:0005622//intracellular;GO:0005623//cell;GO:0005634//nucleus;GO:0005681//spliceosomal complex;GO:0005684//U2-type spliceosomal complex;GO:0005737//cytoplasm;GO:0005739//mitochondrion;GO:0005740//mitochondrial envelope;GO:0005741//mitochondrial outer membrane;GO:0005783//endoplasmic reticulum;GO:0005789//endoplasmic re…	GO:0003674//molecular_function;GO:0003824//catalytic activity;GO:0004842//ubiquitin-protein transferase activity;GO:0005488//binding;GO:0005515//protein binding;GO:0008270//zinc ion binding;GO:0016740//transferase activity;GO:0019787//ubiquitin-like protein transferase activity;GO:0019899//enzyme binding;GO:0043167//ion binding;GO:0043169//cation binding;GO:0044390//ubiquitin-like protein conjuga…	GO:0000375//RNA splicing, via transesterification reactions;GO:0000377//RNA splicing, via transesterification reactions with bulged adenosine as nucleophile;GO:0000398//mRNA splicing, via spliceosome;GO:0006139//nucleobase-containing compound metabolic process;GO:0006289//nucleotide-excision repair;GO:0006396//RNA processing;GO:0006397//mRNA processing;GO:0006464//cellular protein modification pr…	--
TraesCS3D03G0813100	368	267	79	35	15.895	15.18	4.396	2.819	15.5375	3.6075	-2.10668	5.85141e-13	9.00968e-11	--	-	-	-	-	-	-	-	--
TraesCS3A03G0922800LC	424	337	1389	1230	10.669	11.152	44.963	58.247	10.9105	51.605	2.24179	6.03855e-13	9.2831e-11	NPF8.3	-	-	-	-	GO:0016020//membrane	GO:0015333//peptide:proton symporter activity;GO:0022857//transmembrane transporter activity	GO:0015833//peptide transport;GO:0055085//transmembrane transport	--
TraesCS4A03G0550400	17214	12249	5229	1715	546.833	511.785	213.649	102.383	529.309	158.016	-1.74404	6.06087e-13	9.30266e-11	ALDP	Metabolism;Metabolism;Metabolism;Metabolism;Metabolism;Metabolism;Metabolism;Metabolism	Global and overview maps;Global and overview maps;Global and overview maps;Global and overview maps;Carbohydrate metabolism;Energy metabolism;Carbohydrate metabolism;Carbohydrate metabolism	ko01100//Metabolic pathways;ko01110//Biosynthesis of secondary metabolites;ko01200//Carbon metabolism;ko01230//Biosynthesis of amino acids;ko00010//Glycolysis / Gluconeogenesis;ko00710//Carbon fixation in photosynthetic organisms;ko00051//Fructose and mannose metabolism;ko00030//Pentose phosphate pathway	K01623;K01623;K01623;K01623;K01623;K01623;K01623;K01623	-	GO:0004332//fructose-bisphosphate aldolase activity	GO:0006096//glycolytic process	--
TraesCS7D03G1125300	56	52	310	416	1.936	2.379	13.801	27.051	2.1575	20.426	3.24297	6.24176e-13	9.56518e-11	At5g10770	-	-	-	-	-	-	-	--
TraesCS3B03G1053900	1804	967	472	211	48.332	34.067	16.277	10.629	41.1995	13.453	-1.6147	6.48721e-13	9.92563e-11	At3g49140	-	-	-	-	-	-	-	--
TraesCS5B03G0618800	97	96	482	514	4.176	5.436	26.673	41.621	4.806	34.147	2.82885	6.8709e-13	1.04961e-10	MPT3	-	-	-	-	GO:0005575//cellular_component;GO:0005622//intracellular;GO:0005623//cell;GO:0005737//cytoplasm;GO:0005739//mitochondrion;GO:0005740//mitochondrial envelope;GO:0005743//mitochondrial inner membrane;GO:0016020//membrane;GO:0016021//integral component of membrane;GO:0019866//organelle inner membrane;GO:0031090//organelle membrane;GO:0031224//intrinsic component of membrane;GO:0031966//mitochondrial…	GO:0003674//molecular_function;GO:0005215//transporter activity;GO:0008509//anion transmembrane transporter activity;GO:0015075//ion transmembrane transporter activity;GO:0015103//inorganic anion transmembrane transporter activity;GO:0015114//phosphate ion transmembrane transporter activity;GO:0015318//inorganic solute uptake transmembrane transporter activity;GO:0022857//transmembrane transporte…	GO:0006810//transport;GO:0006811//ion transport;GO:0006817//phosphate ion transport;GO:0006820//anion transport;GO:0006839//mitochondrial transport;GO:0006950//response to stress;GO:0006970//response to osmotic stress;GO:0008150//biological_process;GO:0009628//response to abiotic stimulus;GO:0009651//response to salt stress;GO:0015698//inorganic anion transport;GO:0034220//ion transmembrane trans…	--
TraesCS6D03G0677100	891	817	2989	3107	25.104	30.305	108.371	164.572	27.7045	136.471	2.30041	6.9775e-13	1.06422e-10	SKIP11	-	-	-	-	-	GO:0005515//protein binding	-	--
TraesCS7A03G1357000	321	162	39	9	10.575	6.711	1.733	0.774	8.643	1.2535	-2.78557	7.02636e-13	1.06999e-10	PSY1	Metabolism;Metabolism;Metabolism	Global and overview maps;Global and overview maps;Metabolism of terpenoids and polyketides	ko01100//Metabolic pathways;ko01110//Biosynthesis of secondary metabolites;ko00906//Carotenoid biosynthesis	K02291;K02291;K02291	GO:0005575//cellular_component;GO:0005622//intracellular;GO:0005623//cell;GO:0005737//cytoplasm;GO:0009507//chloroplast;GO:0009526//plastid envelope;GO:0009536//plastid;GO:0009941//chloroplast envelope;GO:0016020//membrane;GO:0031090//organelle membrane;GO:0031967//organelle envelope;GO:0031969//chloroplast membrane;GO:0031975//envelope;GO:0042170//plastid membrane;GO:0043226//organelle;GO:004322…	GO:0003674//molecular_function;GO:0003824//catalytic activity;GO:0004310//farnesyl-diphosphate farnesyltransferase activity;GO:0004311//farnesyltranstransferase activity;GO:0004337//geranyltranstransferase activity;GO:0004659//prenyltransferase activity;GO:0016740//transferase activity;GO:0016765//transferase activity, transferring alkyl or aryl (other than methyl) groups;GO:0016767//geranylgeran…	GO:0006066//alcohol metabolic process;GO:0006629//lipid metabolic process;GO:0006694//steroid biosynthetic process;GO:0006696//ergosterol biosynthetic process;GO:0006720//isoprenoid metabolic process;GO:0006721//terpenoid metabolic process;GO:0008150//biological_process;GO:0008152//metabolic process;GO:0008202//steroid metabolic process;GO:0008204//ergosterol metabolic process;GO:0008299//isopren…	--
MSTRG.41821	145	72	511	654	19.028	12.427	86.243	161.277	15.7275	123.76	2.97618	7.09265e-13	1.07839e-10	--	-	-	-	-	-	-	-	--
TraesCS5D03G0615400	149	98	748	412	4.653	4.027	30.101	24.241	4.34	27.171	2.6463	7.40147e-13	1.12359e-10	At4g20820	Metabolism;Metabolism;Metabolism	Global and overview maps;Global and overview maps;Biosynthesis of other secondary metabolites	ko01100//Metabolic pathways;ko01110//Biosynthesis of secondary metabolites;ko00940//Phenylpropanoid biosynthesis	K22395;K22395;K22395	GO:0005634//nucleus	GO:0003677//DNA binding;GO:0005496//steroid binding;GO:0008891//glycolate oxidase activity;GO:0016491//oxidoreductase activity;GO:0030284//estrogen receptor activity;GO:0050660//flavin adenine dinucleotide binding	GO:0005975//carbohydrate metabolic process;GO:0006355//regulation of transcription, DNA-templated;GO:0043401//steroid hormone mediated signaling pathway;GO:0055114//oxidation-reduction process	--
TraesCS6B03G0025400	409	296	82	23	25.798	24.556	6.652	2.726	25.177	4.689	-2.42475	7.51046e-13	1.13697e-10	--	-	-	-	-	-	GO:0003824//catalytic activity	GO:0001887//selenium compound metabolic process;GO:0006400//tRNA modification;GO:0009228//thiamine biosynthetic process	--
TraesCS3D03G0567000	1136	861	307	94	69.479	69.319	24.151	10.859	69.399	17.505	-1.98715	7.51537e-13	1.13697e-10	RPL12-2	Genetic Information Processing	Translation	ko03010//Ribosome	K02935	GO:0000315//organellar large ribosomal subunit;GO:0005575//cellular_component;GO:0005622//intracellular;GO:0005623//cell;GO:0005737//cytoplasm;GO:0005840//ribosome;GO:0009507//chloroplast;GO:0009536//plastid;GO:0009898//cytoplasmic side of plasma membrane;GO:0022625//cytosolic large ribosomal subunit;GO:0032991//macromolecular complex;GO:0043226//organelle;GO:0043227//membrane-bounded organelle;G…	GO:0003674//molecular_function;GO:0003735//structural constituent of ribosome;GO:0005198//structural molecule activity;GO:0005524//ATP binding;GO:0042626//ATPase activity, coupled to transmembrane movement of substances	GO:0006412//translation;GO:0006518//peptide metabolic process;GO:0006807//nitrogen compound metabolic process;GO:0006810//transport;GO:0008150//biological_process;GO:0008152//metabolic process;GO:0009058//biosynthetic process;GO:0009059//macromolecule biosynthetic process;GO:0009987//cellular process;GO:0010467//gene expression;GO:0019538//protein metabolic process;GO:0034641//cellular nitrogen c…	--
TraesCS3D03G1052000	314	198	970	1054	14.861	12.316	59.001	93.674	13.5885	76.3375	2.49001	7.52477e-13	1.13697e-10	VIT_06s0061g00120	-	-	-	-	-	GO:0004553//hydrolase activity, hydrolyzing O-glycosyl compounds	GO:0005975//carbohydrate metabolic process	--
TraesCS1B03G1177500	297	222	57	23	18.552	18.246	4.604	2.672	18.399	3.638	-2.33841	7.85609e-13	1.18518e-10	RPL12-2	Genetic Information Processing	Translation	ko03010//Ribosome	K02935	GO:0000315//organellar large ribosomal subunit;GO:0005840//ribosome;GO:0022625//cytosolic large ribosomal subunit	GO:0003735//structural constituent of ribosome	GO:0006412//translation	--
TraesCS4D03G0092400	131	103	518	798	4.343	4.491	22.085	49.711	4.417	35.898	3.02276	7.93076e-13	1.19459e-10	At3g17800	-	-	-	-	-	-	-	--
TraesCS1B03G0644100	217	266	1107	1202	5.41	8.7	35.473	56.234	7.055	45.8535	2.70031	8.07264e-13	1.21408e-10	POX2	Metabolism;Metabolism;Metabolism	Global and overview maps;Global and overview maps;Amino acid metabolism	ko01100//Metabolic pathways;ko01110//Biosynthesis of secondary metabolites;ko00330//Arginine and proline metabolism	K00318;K00318;K00318	GO:0005575//cellular_component;GO:0005622//intracellular;GO:0005623//cell;GO:0005737//cytoplasm;GO:0005739//mitochondrion;GO:0005759//mitochondrial matrix;GO:0031974//membrane-enclosed lumen;GO:0043226//organelle;GO:0043227//membrane-bounded organelle;GO:0043229//intracellular organelle;GO:0043231//intracellular membrane-bounded organelle;GO:0043233//organelle lumen;GO:0044422//organelle part;GO:…	GO:0000166//nucleotide binding;GO:0003674//molecular_function;GO:0003824//catalytic activity;GO:0004657//proline dehydrogenase activity;GO:0005488//binding;GO:0016491//oxidoreductase activity;GO:0016645//oxidoreductase activity, acting on the CH-NH group of donors;GO:0036094//small molecule binding;GO:0043167//ion binding;GO:0043168//anion binding;GO:0048037//cofactor binding;GO:0050660//flavin a…	GO:0001101//response to acid chemical;GO:0006082//organic acid metabolic process;GO:0006520//cellular amino acid metabolic process;GO:0006536//glutamate metabolic process;GO:0006537//glutamate biosynthetic process;GO:0006560//proline metabolic process;GO:0006562//proline catabolic process;GO:0006807//nitrogen compound metabolic process;GO:0006950//response to stress;GO:0006970//response to osmoti…	--
TraesCS7D03G1105900	10	10	120	232	0.135	0.177	2.138	5.858	0.156	3.998	4.67966	8.10379e-13	1.21687e-10	ABCG41	-	-	-	-	GO:0000502//proteasome complex;GO:0005575//cellular_component;GO:0005887//integral component of plasma membrane;GO:0009379//Holliday junction helicase complex;GO:0009380//excinuclease repair complex;GO:0009898//cytoplasmic side of plasma membrane;GO:0016020//membrane;GO:0016021//integral component of membrane;GO:0043190//ATP-binding cassette (ABC) transporter complex;GO:0055051//ATP-binding casse…	GO:0000166//nucleotide binding;GO:0003674//molecular_function;GO:0003678//DNA helicase activity;GO:0003723//RNA binding;GO:0003724//RNA helicase activity;GO:0003924//GTPase activity;GO:0004386//helicase activity;GO:0005198//structural molecule activity;GO:0005260//channel-conductance-controlling ATPase activity;GO:0005319//lipid transporter activity;GO:0005524//ATP binding;GO:0005525//GTP binding…	GO:0000910//cytokinesis;GO:0001887//selenium compound metabolic process;GO:0006260//DNA replication;GO:0006281//DNA repair;GO:0006289//nucleotide-excision repair;GO:0006310//DNA recombination;GO:0006400//tRNA modification;GO:0006464//cellular protein modification process;GO:0006576//cellular biogenic amine metabolic process;GO:0006810//transport;GO:0006817//phosphate ion transport;GO:0006824//cob…	--
TraesCS6D03G0829600	26	18	193	207	0.411	0.369	3.88	6.099	0.39	4.9895	3.67735	8.13828e-13	1.22016e-10	XA21	-	-	-	-	-	GO:0004672//protein kinase activity;GO:0005515//protein binding;GO:0005524//ATP binding	GO:0006468//protein phosphorylation	--
TraesCS4A03G0369100	87	66	412	353	2.758	2.751	16.81	21.024	2.7545	18.917	2.77982	8.18709e-13	1.22559e-10	NAAT1	Metabolism;Metabolism;Metabolism;Metabolism;Metabolism;Metabolism;Metabolism;Metabolism;Metabolism;Metabolism	Global and overview maps;Global and overview maps;Global and overview maps;Metabolism of cofactors and vitamins;Amino acid metabolism;Amino acid metabolism;Amino acid metabolism;Amino acid metabolism;Biosynthesis of other secondary metabolites;Biosynthesis of other secondary metabolites	ko01100//Metabolic pathways;ko01110//Biosynthesis of secondary metabolites;ko01230//Biosynthesis of amino acids;ko00130//Ubiquinone and other terpenoid-quinone biosynthesis;ko00270//Cysteine and methionine metabolism;ko00360//Phenylalanine metabolism;ko00350//Tyrosine metabolism;ko00400//Phenylalanine, tyrosine and tryptophan biosynthesis;ko00950//Isoquinoline alkaloid biosynthesis;ko00960//Tropa…	K00815;K00815;K00815;K00815;K00815;K00815;K00815;K00815;K00815;K00815	GO:0005737//cytoplasm	GO:0003824//catalytic activity;GO:0004400//histidinol-phosphate transaminase activity;GO:0004838//L-tyrosine:2-oxoglutarate aminotransferase activity;GO:0009016//succinyldiaminopimelate transaminase activity;GO:0016829//lyase activity;GO:0030170//pyridoxal phosphate binding;GO:0047688//aspartate 4-decarboxylase activity;GO:0048472//threonine-phosphate decarboxylase activity	GO:0000105//histidine biosynthetic process;GO:0006520//cellular amino acid metabolic process;GO:0006531//aspartate metabolic process;GO:0006559//L-phenylalanine catabolic process;GO:0006572//tyrosine catabolic process;GO:0009058//biosynthetic process;GO:0009236//cobalamin biosynthetic process;GO:0019877//diaminopimelate biosynthetic process;GO:0042398//cellular modified amino acid biosynthetic pr…	--
TraesCS6D03G0549200	1624	1113	504	214	60.969	54.917	24.327	15.125	57.943	19.726	-1.55454	8.26031e-13	1.23464e-10	At4g17560	Genetic Information Processing	Translation	ko03010//Ribosome	K02884	GO:0000311//plastid large ribosomal subunit;GO:0005840//ribosome;GO:0022625//cytosolic large ribosomal subunit	GO:0003735//structural constituent of ribosome	GO:0006412//translation	--
TraesCS1D03G0927000	170	139	647	741	11.457	12.321	56.081	93.815	11.889	74.948	2.65626	8.41703e-13	1.25613e-10	CNR2	-	-	-	-	GO:0005575//cellular_component;GO:0016020//membrane;GO:0016021//integral component of membrane;GO:0031224//intrinsic component of membrane;GO:0044425//membrane part	-	GO:0008150//biological_process;GO:0008285//negative regulation of cell proliferation;GO:0042127//regulation of cell proliferation;GO:0048519//negative regulation of biological process;GO:0048523//negative regulation of cellular process;GO:0050789//regulation of biological process;GO:0050794//regulation of cellular process;GO:0065007//biological regulation	--
TraesCS5B03G1143000	31041	24275	10521	3778	1737.21	1786.81	757.295	397.308	1762.01	577.302	-1.60982	8.73411e-13	1.30145e-10	psaD	Metabolism;Metabolism	Global and overview maps;Energy metabolism	ko01100//Metabolic pathways;ko00195//Photosynthesis	K02692;K02692	GO:0005575//cellular_component;GO:0005622//intracellular;GO:0005623//cell;GO:0005737//cytoplasm;GO:0009507//chloroplast;GO:0009521//photosystem;GO:0009522//photosystem I;GO:0009534//chloroplast thylakoid;GO:0009535//chloroplast thylakoid membrane;GO:0009536//plastid;GO:0009538//photosystem I reaction center;GO:0009579//thylakoid;GO:0016020//membrane;GO:0031976//plastid thylakoid;GO:0031984//organ…	-	GO:0008150//biological_process;GO:0008152//metabolic process;GO:0009987//cellular process;GO:0015979//photosynthesis;GO:0044237//cellular metabolic process	--
TraesCS4A03G0663700	1212	1115	3994	3915	46.701	56.468	197.85	283.392	51.5845	240.621	2.22175	8.7884e-13	1.30753e-10	CATHB2	-	-	-	-	-	GO:0004197//cysteine-type endopeptidase activity;GO:0008234//cysteine-type peptidase activity	GO:0006508//proteolysis;GO:0050790//regulation of catalytic activity	--
TraesCS1D03G0431300	119	82	479	445	4.175	3.784	21.614	29.34	3.9795	25.477	2.67854	9.2163e-13	1.36909e-10	CBSX5	-	-	-	-	-	-	-	--
TraesCS7A03G0786400	18	42	296	327	0.703	2.158	14.874	24.009	1.4305	19.4415	3.76455	9.31226e-13	1.38123e-10	PER47	Metabolism;Metabolism;Metabolism	Global and overview maps;Global and overview maps;Biosynthesis of other secondary metabolites	ko01100//Metabolic pathways;ko01110//Biosynthesis of secondary metabolites;ko00940//Phenylpropanoid biosynthesis	K00430;K00430;K00430	-	GO:0004096//catalase activity;GO:0004601//peroxidase activity;GO:0020037//heme binding	GO:0006979//response to oxidative stress;GO:0055114//oxidation-reduction process	--
TraesCS2D03G1180100	47	37	286	250	1.221	1.264	9.557	12.207	1.2425	10.882	3.13063	9.49468e-13	1.40614e-10	At5g10370	-	-	-	-	-	GO:0046872//metal ion binding	-	--
TraesCS2D03G0584300	17538	14268	5778	1909	1169.56	1251.49	495.544	239.24	1210.53	367.392	-1.72024	9.66975e-13	1.42989e-10	PSAK	Metabolism	Energy metabolism	ko00195//Photosynthesis	K02698	GO:0005575//cellular_component;GO:0005622//intracellular;GO:0005623//cell;GO:0005737//cytoplasm;GO:0009507//chloroplast;GO:0009521//photosystem;GO:0009522//photosystem I;GO:0009534//chloroplast thylakoid;GO:0009535//chloroplast thylakoid membrane;GO:0009536//plastid;GO:0009538//photosystem I reaction center;GO:0009579//thylakoid;GO:0016020//membrane;GO:0016021//integral component of membrane;GO:0…	GO:0003674//molecular_function	GO:0008150//biological_process;GO:0008152//metabolic process;GO:0009987//cellular process;GO:0015979//photosynthesis;GO:0019684//photosynthesis, light reaction;GO:0044237//cellular metabolic process	--
TraesCS5D03G0011700	29	19	201	212	1.902	1.628	16.845	25.961	1.765	21.403	3.60007	9.79585e-13	1.44633e-10	CYP51	Metabolism;Metabolism;Metabolism	Global and overview maps;Global and overview maps;Lipid metabolism	ko01100//Metabolic pathways;ko01110//Biosynthesis of secondary metabolites;ko00100//Steroid biosynthesis	K05917;K05917;K05917	-	GO:0005506//iron ion binding;GO:0016705//oxidoreductase activity, acting on paired donors, with incorporation or reduction of molecular oxygen;GO:0020037//heme binding	GO:0055114//oxidation-reduction process	--
TraesCS4B03G0552500	414	230	40	57	45.344	33.179	5.696	11.763	39.2615	8.7295	-2.16914	1.00148e-12	1.4764e-10	ESI3	-	-	-	-	GO:0005575//cellular_component;GO:0016020//membrane;GO:0016021//integral component of membrane;GO:0031224//intrinsic component of membrane;GO:0043190//ATP-binding cassette (ABC) transporter complex;GO:0044425//membrane part	GO:0042626//ATPase activity, coupled to transmembrane movement of substances	GO:0006810//transport	--
TraesCS3A03G0675900	463	277	1458	1073	3.864	3.041	15.659	16.843	3.4525	16.251	2.23482	1.04947e-12	1.5448e-10	Os01g0681900	Metabolism;Metabolism;Metabolism;Metabolism;Metabolism	Global and overview maps;Global and overview maps;Global and overview maps;Energy metabolism;Amino acid metabolism	ko01100//Metabolic pathways;ko01110//Biosynthesis of secondary metabolites;ko01230//Biosynthesis of amino acids;ko00910//Nitrogen metabolism;ko00250//Alanine, aspartate and glutamate metabolism	K00264;K00264;K00264;K00264;K00264	GO:0005575//cellular_component;GO:0005622//intracellular;GO:0005623//cell;GO:0005737//cytoplasm;GO:0009342//glutamate synthase complex (NADPH);GO:0009501//amyloplast;GO:0009507//chloroplast;GO:0009532//plastid stroma;GO:0009536//plastid;GO:0009570//chloroplast stroma;GO:0043226//organelle;GO:0043227//membrane-bounded organelle;GO:0043229//intracellular organelle;GO:0043231//intracellular membrane…	GO:0000166//nucleotide binding;GO:0003674//molecular_function;GO:0003824//catalytic activity;GO:0004148//dihydrolipoyl dehydrogenase activity;GO:0004355//glutamate synthase (NADPH) activity;GO:0004499//N,N-dimethylaniline monooxygenase activity;GO:0004729//oxygen-dependent protoporphyrinogen oxidase activity;GO:0004791//thioredoxin-disulfide reductase activity;GO:0005488//binding;GO:0005506//iron…	GO:0001505//regulation of neurotransmitter levels;GO:0006082//organic acid metabolic process;GO:0006096//glycolytic process;GO:0006520//cellular amino acid metabolic process;GO:0006536//glutamate metabolic process;GO:0006537//glutamate biosynthetic process;GO:0006541//glutamine metabolic process;GO:0006779//porphyrin-containing compound biosynthetic process;GO:0006790//sulfur compound metabolic p…	--
TraesCS5B03G0985700LC	13	6	481	1124	1.14	0.678	54.252	185.155	0.909	119.704	7.04097	1.05189e-12	1.54603e-10	OsI_14861	-	-	-	-	-	GO:0008234//cysteine-type peptidase activity	GO:0006508//proteolysis	--
TraesCS5A03G0487100	6337	4566	2184	901	247.674	238.564	111.588	69.167	243.119	90.3775	-1.42763	1.0918e-12	1.60226e-10	yeaD	Metabolism;Metabolism;Metabolism	Global and overview maps;Global and overview maps;Carbohydrate metabolism	ko01100//Metabolic pathways;ko01110//Biosynthesis of secondary metabolites;ko00010//Glycolysis / Gluconeogenesis	K01792;K01792;K01792	-	GO:0003674//molecular_function;GO:0003824//catalytic activity;GO:0005488//binding;GO:0016853//isomerase activity;GO:0016854//racemase and epimerase activity;GO:0016857//racemase and epimerase activity, acting on carbohydrates and derivatives;GO:0030246//carbohydrate binding;GO:0047938//glucose-6-phosphate 1-epimerase activity	GO:0005975//carbohydrate metabolic process;GO:0008150//biological_process;GO:0008152//metabolic process;GO:0044238//primary metabolic process;GO:0071704//organic substance metabolic process	--
TraesCS3D03G0735400	64	42	351	256	2.217	1.913	15.651	16.664	2.065	16.1575	2.96799	1.16025e-12	1.70013e-10	UGT87A1	-	-	-	-	-	GO:0008194//UDP-glycosyltransferase activity;GO:0016758//transferase activity, transferring hexosyl groups	-	--
TraesCS3A03G0557800	159	84	547	623	4.644	3.24	20.559	34.23	3.942	27.3945	2.79689	1.18961e-12	1.73956e-10	HSR4	-	-	-	-	GO:0000502//proteasome complex;GO:0009360//DNA polymerase III complex;GO:0009379//Holliday junction helicase complex;GO:0009898//cytoplasmic side of plasma membrane;GO:0055052//ATP-binding cassette (ABC) transporter complex, substrate-binding subunit-containing	GO:0003723//RNA binding;GO:0003724//RNA helicase activity;GO:0003887//DNA-directed DNA polymerase activity;GO:0004222//metalloendopeptidase activity;GO:0004386//helicase activity;GO:0005524//ATP binding;GO:0009378//four-way junction helicase activity;GO:0015412//molybdate transmembrane-transporting ATPase activity;GO:0016818//hydrolase activity, acting on acid anhydrides, in phosphorus-containing…	GO:0006260//DNA replication;GO:0006281//DNA repair;GO:0006310//DNA recombination;GO:0006508//proteolysis;GO:0010498//proteasomal protein catabolic process;GO:0015689//molybdate ion transport;GO:0019941//modification-dependent protein catabolic process;GO:0032297//negative regulation of DNA-dependent DNA replication initiation;GO:0043107//type IV pilus-dependent motility;GO:0051301//cell division	--
TraesCS4B03G0943100	587	464	172	108	38.427	39.577	14.516	13.135	39.002	13.8255	-1.49622	1.19074e-12	1.73956e-10	--	-	-	-	-	-	GO:0046983//protein dimerization activity	-	bHLH
TraesCS4D03G0712800	115	133	693	506	3.271	4.99	25.34	27.045	4.1305	26.1925	2.66477	1.19938e-12	1.74954e-10	DTX27	-	-	-	-	GO:0016020//membrane	GO:0015238//drug transmembrane transporter activity;GO:0015297//antiporter activity;GO:0042910//xenobiotic transporter activity	GO:0006855//drug transmembrane transport;GO:0042493//response to drug;GO:0055085//transmembrane transport	--
TraesCS3A03G0207800	147	123	687	462	16.816	18.507	101.076	99.317	17.6615	100.197	2.50415	1.22385e-12	1.78255e-10	--	-	-	-	-	-	GO:0004867//serine-type endopeptidase inhibitor activity	GO:0009611//response to wounding	--
TraesCS2A03G0836000	701	541	202	83	23.862	24.221	8.843	5.309	24.0415	7.076	-1.76452	1.22905e-12	1.78745e-10	BT2	-	-	-	-	-	GO:0005515//protein binding	-	--
[truncated: 268,825+ more rows]

## Sheet: Table S6. RNA-seq DEGs
Supplementary Table S6. Annotation of all genes with significant differential expression in RNA-seq
id	CK-1_In_count	CK-2_In_count	Infected-1_In_count	Infected-2_In_count	CK-1_In_tpm	CK-2_In_tpm	Infected-1_In_tpm	Infected-2_In_tpm	CK_mean	Infected_mean	log2(fc)	p-value	FDR	Symbol	KEGG_A_class	KEGG_B_class	Pathway	K_ID	GO Component	GO Function	GO Process	TF_family
[truncated: 5,915 more rows]

## Sheet: Table S7. DEGs heatmap cluster
Supplementary Table S7. Heatmap clustering of differentially expressed genes (DEGs)
Gene IDs	TPM+1_CK-1_In	TPM+1_CK-2_In	TPM+1_Infected-1_In	TPM+1_Infected-2_In	Cluster_Row
TraesCS6B03G0215300	1.069	1.303	1.253	6.832	1
TraesCS7D03G0020400	1	1.03	1.088	3.442	1
TraesCS4B03G0905100	1	1	1.14	2.816	1
TraesCS3D03G0068000	1.144	1.094	1.641	4.366	1
TraesCS2A03G0950600	5.406	3.643	10.914	34.465	1
TraesCS7D03G0100700	1	1.151	3.659	2.943	1
TraesCS2B03G1176700	1.379	1.606	4.625	7.521	1
TraesCS2D03G0673600	1	1	1.069	2.264	2
TraesCS4A03G0013600	1.045	1.176	1.344	5.442	2
TraesCS5B03G0943700	1.349	1.367	1.628	6.639	2
TraesCS6B03G0214200	1	1	1.293	6.244	2
TraesCS5D03G1024500	2.272	1.856	3.931	7.117	2
TraesCS1D03G0995900	1.41	1.124	3.658	8.307	2
TraesCS7A03G0248500	3.12	3.027	6.332	11.188	2
TraesCS5D03G1163900	2.677	2.546	8.236	19.566	2
TraesCS3D03G0315100	4.517	4.153	8.44	13.828	2
TraesCS2A03G0055100	1.033	1	1.587	2.47	2
TraesCS2D03G0798600	7.497	7.631	18.747	36.175	2
TraesCS5B03G0776600	1.036	1.048	2.025	3.111	2
TraesCS4D03G0189100	1.733	1.686	3.698	5.986	2
TraesCS3A03G1064300	2.237	2.205	7.481	15.722	2
[truncated: 5,894 more rows]

## Sheet: Table S8. RNA-seq DEGs GO BP
Supplementary Table S8. Gene Ontology (GO) terms enrichment in biological processes of differentially expressed genes (DEGs)
[truncated: 3,206 more rows]

[truncated: 4 more sheets: Table S9. RNA-seq DEGs GO MF, Table S10. RNA-seq DEGs GO CC, Table S11. DEGs Level2 GO, Table S12. DEGs KEGG]
