# Supplementary material for: Transcriptome-Wide N6-Methyladenosine (m6A) Methylation Analyses in a Compatible Wheat–Puccinia striiformis f. sp. tritici Interaction
Source: Plants (Basel). 2024 Mar 29;13(7):982. doi: 10.3390/plants13070982 (PMC11013425; doi:10.3390/plants13070982)
Supplement: Supplementary file 1 [file plants-13-00982-s001.zip › Supplementary Tables S13-S29 MeRIP-seq.xlsx]

## Sheet: Table S13. MeRIPseq data clean
Supplementary Table S13. Data filtering statistics of MeRIP-seq
Sample	Raw Data	Clean Data (%)	Adapter (%)	Low Quality (%)	poly A (%)	N (%)
CK-1_IP	66766370	64987614 (97.34%)	631734 (0.95%)	1143672 (1.71%)	0 (0.00%)	3350 (0.01%)
CK-2_IP	72165514	70615986 (97.85%)	608530 (0.84%)	940586 (1.30%)	0 (0.00%)	412 (0.00%)
Infected-1_IP	60717364	59830336 (98.54%)	300020 (0.49%)	586724 (0.97%)	0 (0.00%)	284 (0.00%)
Infected-2_IP	61691474	60527992 (98.11%)	333474 (0.54%)	829790 (1.35%)	0 (0.00%)	218 (0.00%)
Sample: sample name; Raw Data: number of raw reads after sequencing; Clean Data (%): number of high-quality reads and percentage (based on RawReads); Adapter (%): number of reads containing adapter and percentage (based on RawReads); Low Quality (%): low-quality reads, that is, the number and percentage (based on RawReads) of more than 50% of the reads with a base quality value Q≤20 in single rea…

## Sheet: Table S14. MeRIPseq base stat.
Supplementary Table S14. Base information statistics of MeRIP-seq
Sample	Raw Data (bp)	Clean Data (bp)	AF_Q20 (%)	AF_Q30 (%)	AF_N (%)	AF_GC (%)
CK-1_IP	10014955500	7400073604	7245384297 (97.91%)	6964629149 (94.12%)	107271 (0.00%)	3555876770 (48.05%)
CK-2_IP	10824827100	7636172311	7494655640 (98.15%)	7226069749 (94.63%)	87578 (0.00%)	3953607597 (51.77%)
Infected-1_IP	9107604600	6416664262	6303221627 (98.23%)	6082420633 (94.79%)	83937 (0.00%)	3222045727 (50.21%)
Infected-2_IP	9253721100	6643945543	6512315699 (98.02%)	6265420202 (94.30%)	87280 (0.00%)	3353937906 (50.48%)
Sample: sample name; AF: After filter, sample base information after filtering; Raw Data (bp): Total number of bases in the sequencing data (unit bp); Clean Data (bp): The total number of high-quality data bases after filtering (unit bp); Q20 (%): The number of bases with a sequencing base quality value above Q20 and its percentage in CleanData; Q30 (%): The number of bases with values above Q30 …

## Sheet: Table S15. MeRIPseq rRNA filter
Supplementary Table S15. Ribosomal RNA mapping and filtering statistics of MeRIP-seq
Sample	Total_Reads	Mapped_Reads	Unmapped_Reads
CK-1_IP	64987614	2629994(4.05%)	62357620(95.95%)
CK-2_IP	70615986	5824816(8.25%)	64791170(91.75%)
Infected-1_IP	59830336	1868042(3.12%)	57962294(96.88%)
Infected-2_IP	60527992	5005870(8.27%)	55522122(91.73%)
Sample: sample name; clean_reads: number of high-quality reads; Mapped_Reads (%): The number of reads and the percentage (based on cleand reads) of ribosomes of this species on the comparison; Unmapped_Reads (%): Number and percentage of reads that cannot match ribosomes (based on cleand reads)

## Sheet: Table S16. MeRIPseq genome map
Supplementary Table S16. Reference genome mapping statistics of MeRIP-seq
Sample	Total_Reads	Unmapped_Reads (%)	Unique_Mapped_Reads (%)	Multiple_Mapped_reads (%)	Total_Mapped (%)
CK-1_IP	62357620	17857016(28.64%)	38356854(61.51%)	6143750(9.85%)	44500604(71.36%)
CK-2_IP	64791170	10858439(16.76%)	46003967(71.00%)	7928764(12.24%)	53932731(83.24%)
Infected-1_IP	57962294	10937044(18.87%)	40530190(69.93%)	6495060(11.21%)	47025250(81.13%)
Infected-2_IP	55522122	14777731(26.62%)	35500889(63.94%)	5243502(9.44%)	40744391(73.38%)
Sample: sample name; Total reads: The number of reads after filtering rRNA, called effective reads; Unmapped_Reads (%): The number of reads on the reference genome that is not mapped and the proportion of valid reads; Unique_Mapped_Reads (%): The number of reads uniquely in comparison to the reference genome and the proportion of valid reads; Multiple_Mapped_reads (%): The number of reads in the …

## Sheet: Table S17. CK peak MeRIPseq
Supplementary Table S17. CK sample peak identification of MeRIP-seq
chr	start	end	name	score	strand	blockCount	blockSizes	blockStarts	geneID	log2FC	p-value	adj.p-value	lg.p-value	lg.adj.p-value	length
Chr1A	1142975	1143025	CK_peak_1	15.832	+	1	50	0	TraesCS1A03G0003900LC,TraesCS1A03G0004000	4.75191	1.44876e-05	1.71429e-05	4.839	4.76591	50
Chr1A	5033211	5033411	CK_peak_2	130.354	+	1	200	0	TraesCS1A03G0020600	3.82669	4.44382e-41	5.74757e-40	40.3522	39.2405	200
Chr1A	8532616	8532786	CK_peak_3	42.0997	+	1	170	0	TraesCS1A03G0031500	4.30899	8.24358e-14	2.12198e-13	13.0839	12.6733	170
Chr1A	12956960	12957135	CK_peak_4	21.9373	+	1	175	0	TraesCS1A03G0053400	4.7892	1.70578e-07	2.49009e-07	6.76808	6.60379	175
Chr1A	13652549	13652724	CK_peak_5	11.5667	+	1	175	0	TraesCS1A03G0058100,TraesCS1A03G0058200LC	4.94066	0.000316994	0.000329663	3.49895	3.48193	175
Chr1A	15113613	15113788	CK_peak_6	22.947	+	1	175	0	TraesCS1A03G0065800LC,TraesCS1A03G0065900	6.82657	8.21492e-08	1.23674e-07	7.0854	6.90772	175
Chr1A	15517606	15517781	CK_peak_7	33.8307	+	1	175	0	TraesCS1A03G0068100	3.51882	3.14903e-11	6.54574e-11	10.5018	10.184	175
Chr1A	21984967	21985092	CK_peak_8	15.395	+	1	125	0	TraesCS1A03G0084400	7.94611	1.99182e-05	2.32087e-05	4.70075	4.63435	125
Chr1A	23277635	23277791	CK_peak_9	21.2113	+	2	88,12	0,144	TraesCS1A03G0093500	4.32502	2.89843e-07	4.11873e-07	6.53784	6.38524	156
Chr1A	23562320	23562620	CK_peak_10	93.3212	+	1	300	0	TraesCS1A03G0094000	4.87101	1.11456e-29	8.08175e-29	28.9529	28.0925	300
Chr1A	24230349	24230399	CK_peak_11	28.3052	+	1	50	0	TraesCS1A03G0096600	3.88181	1.70334e-09	3.01501e-09	8.7687	8.52071	50
Chr1A	27853533	27853983	CK_peak_12	96.2977	+	1	450	0	TraesCS1A03G0107200	4.92215	1.3575e-30	1.02681e-29	29.8673	28.9885	450
Chr1A	31745121	31745271	CK_peak_13	15.8375	+	1	150	0	TraesCS1A03G0114700	6.74518	1.44256e-05	1.70775e-05	4.84087	4.76757	150
Chr1A	36345438	36345713	CK_peak_14	78.67	+	1	275	0	TraesCS1A03G0128600	3.76373	3.79516e-25	2.0795e-24	24.4208	23.682	275
Chr1A	38849762	38849982	CK_peak_15	107.499	+	1	220	0	TraesCS1A03G0136200	4.5908	4.76738e-34	4.36099e-33	33.3217	32.3604	220
Chr1A	39757809	39757909	CK_peak_16	24.982	+	1	100	0	TraesCS1A03G0139500	4.05653	1.88058e-08	3.01768e-08	7.72571	7.52033	100
Chr1A	44016308	44016433	CK_peak_17	18.7622	+	1	125	0	TraesCS1A03G0147100	3.33897	1.72568e-06	2.24913e-06	5.76304	5.64799	125
Chr1A	44807612	44807737	CK_peak_18	17.4891	+	1	125	0	TraesCS1A03G0150700	6.98323	4.33991e-06	5.43567e-06	5.36252	5.26475	125
Chr1A	44811535	44811710	CK_peak_19	41.3061	+	1	175	0	TraesCS1A03G0150700	3.79354	1.45807e-13	3.6781e-13	12.8362	12.4344	175
Chr1A	51143094	51143344	CK_peak_20	51.2708	+	2	143,32	0,218	TraesCS1A03G0162100	4.05719	1.15765e-16	3.68079e-16	15.9364	15.4341	250
Chr1A	51516976	51517051	CK_peak_21	12.4541	+	1	75	0	TraesCS1A03G0163200	4.37148	0.000167804	0.000178217	3.7752	3.74905	75
Chr1A	51699147	51699197	CK_peak_22	12.2136	+	1	50	0	TraesCS1A03G0164500	3.53429	0.000199455	0.000210542	3.70016	3.67666	50
Chr1A	56367015	56367140	CK_peak_23	17.1446	+	1	125	0	TraesCS1A03G0174000	4.42311	5.57325e-06	6.90162e-06	5.25389	5.16105	125
Chr1A	59683254	59683429	CK_peak_24	38.8082	+	1	175	0	TraesCS1A03G0178400	3.575	8.78364e-13	2.07758e-12	12.0563	11.6824	175
Chr1A	60260993	60261118	CK_peak_25	13.4059	+	1	125	0	TraesCS1A03G0180300	3.96041	8.43535e-05	9.21357e-05	4.0739	4.03557	125
Chr1A	65066536	65066611	CK_peak_26	42.0263	+	1	75	0	TraesCS1A03G0193900	3.66552	8.68817e-14	2.23266e-13	13.0611	12.6512	75
Chr1A	67028838	67028913	CK_peak_27	61.0865	+	1	75	0	TraesCS1A03G0197600	3.46413	1.04595e-19	4.08444e-19	18.9805	18.3889	75
Chr1A	67677040	67677215	CK_peak_28	156.522	+	1	175	0	TraesCS1A03G0200200	3.8387	3.95417e-49	7.62291e-48	48.4029	47.1179	175
Chr1A	67679669	67679794	CK_peak_29	11.9775	+	1	125	0	TraesCS1A03G0200300	3.47312	0.000236442	0.000247971	3.62628	3.6056	125
Chr1A	70087845	70087986	CK_peak_30	46.5739	+	1	141	0	TraesCS1A03G0202700	3.58811	3.33936e-15	9.54665e-15	14.4763	14.0201	141
Chr1A	74072499	74072774	CK_peak_31	97.2781	+	1	275	0	TraesCS1A03G0207600	3.98031	6.75759e-31	5.20437e-30	30.1702	29.2836	275
Chr1A	75664692	75664942	CK_peak_32	69.8321	+	1	250	0	TraesCS1A03G0210300	3.88709	2.04434e-22	9.51591e-22	21.6894	21.0215	250
Chr1A	75694100	75694375	CK_peak_33	50.4456	+	1	275	0	TraesCS1A03G0210700	5.17161	2.08918e-16	6.52157e-16	15.68	15.1856	275
Chr1A	78387554	78387754	CK_peak_34	51.9232	+	1	200	0	TraesCS1A03G0213700	4.30079	7.26096e-17	2.34184e-16	16.139	15.6304	200
Chr1A	79459769	79459944	CK_peak_35	43.852	+	1	175	0	TraesCS1A03G0215400	3.54337	2.342e-14	6.29861e-14	13.6304	13.2008	175
Chr1A	82524855	82524930	CK_peak_36	37.0699	+	1	75	0	TraesCS1A03G0218400	3.75995	3.06018e-12	6.93177e-12	11.5143	11.1592	75
Chr1A	82524955	82525005	CK_peak_37	16.0385	+	1	50	0	TraesCS1A03G0218400	4.08432	1.24523e-05	1.48568e-05	4.90475	4.82807	50
Chr1A	82637776	82637826	CK_peak_38	15.5948	+	1	50	0	TraesCS1A03G0218600	8.01328	1.72188e-05	2.0207e-05	4.764	4.6945	50
Chr1A	84831960	84832160	CK_peak_39	54.2928	+	1	200	0	TraesCS1A03G0220900	3.65557	1.33853e-17	4.53138e-17	16.8734	16.3438	200
Chr1A	87324403	87324503	CK_peak_40	33.4478	+	1	100	0	TraesCS1A03G0224100	4.64438	4.15138e-11	8.53504e-11	10.3818	10.0688	100
Chr1A	87326713	87326788	CK_peak_41	151.797	+	1	75	0	TraesCS1A03G0224100	5.36337	1.11964e-47	2.01576e-46	46.9509	45.6956	75
Chr1A	93426726	93426801	CK_peak_42	25.6691	+	1	75	0	TraesCS1A03G0231200	3.51828	1.14268e-08	1.87424e-08	7.94207	7.72718	75
Chr1A	93765753	93765928	CK_peak_43	33.3603	+	1	175	0	TraesCS1A03G0232100	3.7525	4.41859e-11	9.06853e-11	10.3547	10.0425	175
Chr1A	95619564	95619664	CK_peak_44	18.3954	+	1	100	0	TraesCS1A03G0233400	4.25999	2.24996e-06	2.90023e-06	5.64782	5.53757	100
Chr1A	95653207	95653382	CK_peak_45	43.8413	+	1	175	0	TraesCS1A03G0233600	3.779	2.35976e-14	6.34527e-14	13.6271	13.1975	175
Chr1A	96357168	96357268	CK_peak_46	17.2672	+	1	100	0	TraesCS1A03G0234500	4.20728	5.10192e-06	6.33957e-06	5.29227	5.19794	100
Chr1A	97422284	97422359	CK_peak_47	28.386	+	1	75	0	TraesCS1A03G0241000	3.89198	1.60722e-09	2.85083e-09	8.79392	8.54503	75
Chr1A	103166510	103166627	CK_peak_48	29.9613	+	1	117	0	TraesCS1A03G0255000	4.6118	5.15485e-10	9.5663e-10	9.28778	9.01926	117
Chr1A	108926518	108926568	CK_peak_49	21.0791	+	1	50	0	TraesCS1A03G0260600	4.89514	3.19185e-07	4.51393e-07	6.49596	6.34544	50
Chr1A	110891176	110891351	CK_peak_50	47.3643	+	1	175	0	TraesCS1A03G0264500	5.9787	1.89246e-15	5.51991e-15	14.723	14.2581	175
Chr1A	111772874	111773094	CK_peak_51	153.611	+	1	220	0	TraesCS1A03G0266600	4.3493	3.1109e-48	5.73617e-47	47.5071	46.2414	220
Chr1A	116041935	116042260	CK_peak_52	59.6292	+	1	325	0	TraesCS1A03G0272100,TraesCS1A03G0272200	3.90238	2.96323e-19	1.12153e-18	18.5282	17.9502	325
Chr1A	116739656	116739798	CK_peak_53	36.2098	+	1	142	0	TraesCS1A03G0273200	3.79241	5.68845e-12	1.25824e-11	11.245	10.9002	142
Chr1A	121656239	121656389	CK_peak_54	38.188	+	1	150	0	TraesCS1A03G0280900	3.32147	1.37092e-12	3.19358e-12	11.863	11.4957	150
Chr1A	122167708	122167758	CK_peak_55	21.1639	+	1	50	0	TraesCS1A03G0282800	5.04329	2.99934e-07	4.25618e-07	6.52297	6.37098	50
Chr1A	129227511	129227686	CK_peak_56	19.7137	+	1	175	0	TraesCS1A03G0290600LC	7.39438	8.63107e-07	1.16299e-06	6.06394	5.93443	175
Chr1A	129882339	129882514	CK_peak_57	40.8957	+	1	175	0	TraesCS1A03G0291600	5.31425	1.95812e-13	4.88856e-13	12.7082	12.3108	175
Chr1A	135224110	135224160	CK_peak_58	21.7263	+	1	50	0	TraesCS1A03G0295500	4.24501	1.99044e-07	2.88219e-07	6.70105	6.54028	50
Chr1A	135513934	135514109	CK_peak_59	43.3034	+	1	175	0	TraesCS1A03G0297300	3.89875	3.47621e-14	9.21249e-14	13.4589	13.0356	175
Chr1A	137038999	137039098	CK_peak_60	79.9979	+	1	99	0	TraesCS1A03G0298500	4.31981	1.47543e-25	8.28382e-25	24.8311	24.0818	99
Chr1A	138058951	138059101	CK_peak_61	98.1777	+	1	150	0	TraesCS1A03G0300000LC,TraesCS1A03G0300200	4.10844	3.562e-31	2.78977e-30	30.4483	29.5544	150
Chr1A	139046202	139046377	CK_peak_62	34.8921	+	1	175	0	TraesCS1A03G0300800	4.21989	1.4659e-11	3.13644e-11	10.8339	10.5036	175
Chr1A	151031120	151031295	CK_peak_63	65.0582	+	1	175	0	TraesCS1A03G0311400	4.65323	6.14086e-21	2.60334e-20	20.2118	19.5845	175
Chr1A	156062064	156062203	CK_peak_64	64.1192	+	1	139	0	TraesCS1A03G0316400	4.0188	1.19991e-20	4.99112e-20	19.9209	19.3018	139
Chr1A	174172076	174172196	CK_peak_65	25.6374	+	1	120	0	TraesCS1A03G0331200	3.8249	1.16949e-08	1.91594e-08	7.932	7.71762	120
Chr1A	175938450	175938600	CK_peak_66	21.5087	+	1	150	0	TraesCS1A03G0331900	3.30707	2.33394e-07	3.35157e-07	6.63191	6.47475	150
Chr1A	178408896	178409499	CK_peak_67	51.2155	+	2	166259	0,344	TraesCS1A03G0333400	4.03542	1.20469e-16	3.82474e-16	15.9191	15.4174	603
Chr1A	183902653	183902853	CK_peak_68	95.3583	+	1	200	0	TraesCS1A03G0337200	4.30116	2.63434e-30	1.96917e-29	29.5793	28.7057	200
Chr1A	190235169	190235269	CK_peak_69	25.8384	+	1	100	0	TraesCS1A03G0341100	3.53269	1.01204e-08	1.66677e-08	7.9948	7.77812	100
Chr1A	191796744	191796903	CK_peak_70	19.2175	+	2	47,28	0,131	TraesCS1A03G0342100	4.0938	1.23773e-06	1.64037e-06	5.90737	5.78506	159
Chr1A	220485467	220485721	CK_peak_71	37.965	+	2	38137	0,117	TraesCS1A03G0359500	3.72751	1.60785e-12	3.72729e-12	11.7938	11.4286	254
Chr1A	226758480	226758759	CK_peak_72	106.767	+	2	116,77	0,202	TraesCS1A03G0364800	4.23648	8.00196e-34	7.24166e-33	33.0968	32.1402	279
Chr1A	229181898	229182198	CK_peak_73	41.3328	+	1	300	0	TraesCS1A03G0366300	4.19092	1.42991e-13	3.61066e-13	12.8447	12.4424	300
Chr1A	232058119	232058419	CK_peak_74	60.1874	+	1	300	0	TraesCS1A03G0367900	5.46175	1.99057e-19	7.61713e-19	18.701	18.1182	300
Chr1A	234236940	234237040	CK_peak_75	41.5769	+	1	100	0	TraesCS1A03G0370000	3.84753	1.19914e-13	3.04863e-13	12.9211	12.5159	100
Chr1A	235804849	235805074	CK_peak_76	114.38	+	1	225	0	TraesCS1A03G0370700	3.51504	3.65526e-36	3.69867e-35	35.4371	34.432	225
Chr1A	236123975	236124244	CK_peak_77	137.546	+	1	269	0	TraesCS1A03G0371000	4.18036	2.73548e-43	3.93151e-42	42.563	41.4054	269
Chr1A	237547261	237547511	CK_peak_78	61.0239	+	1	250	0	TraesCS1A03G0371800	5.88439	1.09456e-19	4.26551e-19	18.9608	18.37	250
Chr1A	238581747	238581947	CK_peak_79	32.7284	+	1	200	0	TraesCS1A03G0372800	4.54593	6.9644e-11	1.40532e-10	10.1571	9.85222	200
Chr1A	243842548	243842973	CK_peak_80	125.924	+	1	425	0	TraesCS1A03G0381000	4.66589	1.02311e-39	1.23919e-38	38.9901	37.9069	425
Chr1A	244627914	244628014	CK_peak_81	14.8591	+	1	100	0	TraesCS1A03G0381500	3.91598	2.93917e-05	3.36482e-05	4.53178	4.47304	100
Chr1A	247333905	247333980	CK_peak_82	24.3041	+	1	75	0	TraesCS1A03G0384700	3.59294	3.06622e-08	4.82775e-08	7.5134	7.31626	75
Chr1A	250844743	250844943	CK_peak_83	52.2982	+	1	200	0	TraesCS1A03G0387200	5.90829	5.54817e-17	1.80585e-16	16.2559	15.7433	200
Chr1A	257370477	257370527	CK_peak_84	30.6	+	1	50	0	TraesCS1A03G0398900	3.97492	3.24762e-10	6.14428e-10	9.48844	9.21153	50
Chr1A	260937753	260937903	CK_peak_85	32.1046	+	1	150	0	TraesCS1A03G0405700	3.62548	1.09387e-10	2.16544e-10	9.96104	9.66445	150
Chr1A	263022586	263023306	CK_peak_86	34.3874	+	2	172,28	0,692	TraesCS1A03G0407700	4.60915	2.10701e-11	4.45012e-11	10.6763	10.3516	720
Chr1A	264720312	264720562	CK_peak_87	146.739	+	1	250	0	TraesCS1A03G0409400	4.85667	4.02191e-46	6.71743e-45	45.3956	44.1728	250
Chr1A	269002195	269002415	CK_peak_88	58.4131	+	1	220	0	TraesCS1A03G0412000	4.41541	7.08079e-19	2.60557e-18	18.1499	17.5841	220
Chr1A	270781258	270781608	CK_peak_89	109.39	+	1	350	0	TraesCS1A03G0413800	4.71491	1.25124e-34	1.17561e-33	33.9027	32.9297	350
Chr1A	271848456	271848551	CK_peak_90	24.0853	+	1	95	0	TraesCS1A03G0414800	3.88943	3.59406e-08	5.61822e-08	7.44442	7.2504	95
Chr1A	278594867	278594942	CK_peak_91	14.9817	+	1	75	0	TraesCS1A03G0419300	4.92008	2.69053e-05	3.09062e-05	4.57016	4.50995	75
Chr1A	278764224	278764373	CK_peak_92	68.8062	+	1	149	0	TraesCS1A03G0419500	5.61819	4.25797e-22	1.93763e-21	21.3708	20.7127	149
Chr1A	278870211	278870336	CK_peak_93	14.6231	+	1	125	0	TraesCS1A03G0419600	3.61589	3.48724e-05	3.96281e-05	4.45752	4.402	125
Chr1A	281530532	281530807	CK_peak_94	75.8357	+	1	275	0	TraesCS1A03G0425300	4.39369	2.83705e-24	1.48311e-23	23.5471	22.8288	275
Chr1A	283139491	283139591	CK_peak_95	14.142	+	1	100	0	TraesCS1A03G0426800LC	3.99213	4.94533e-05	5.53152e-05	4.30581	4.25716	100
Chr1A	283145478	283145653	CK_peak_96	20.5564	+	1	175	0	TraesCS1A03G0426800LC	4.2892	4.67106e-07	6.48479e-07	6.33058	6.1881	175
Chr1A	290664501	290664576	CK_peak_97	12.6001	+	1	75	0	TraesCS1A03G0434100	4.16125	0.000150885	0.000161056	3.82135	3.79302	75
Chr1A	290665436	290665682	CK_peak_98	190.606	+	1	246	0	TraesCS1A03G0434100	4.57715	1.34539e-59	4.1869e-58	58.8712	57.3781	246
Chr1A	291916679	291916795	CK_peak_99	33.082	+	1	116	0	TraesCS1A03G0435600	3.88618	5.40149e-11	1.09984e-10	10.2675	9.95867	116
Chr1A	291990495	291990610	CK_peak_100	30.9449	+	1	115	0	TraesCS1A03G0435700	3.37021	2.52927e-10	4.83803e-10	9.59701	9.31533	115
Chr1A	293039540	293039640	CK_peak_101	10.7625	+	1	100	0	TraesCS1A03G0438300	3.52827	0.000563729	0.000575659	3.24893	3.23984	100
Chr1A	295491832	295492045	CK_peak_102	55.2983	+	1	213	0	TraesCS1A03G0442400	6.30226	6.55292e-18	2.25718e-17	17.1836	16.6464	213
Chr1A	297221909	297222084	CK_peak_103	66.8632	+	1	175	0	TraesCS1A03G0445000	4.20514	1.70467e-21	7.45041e-21	20.7684	20.1278	175
Chr1A	299863159	299863348	CK_peak_104	104.064	+	1	189	0	TraesCS1A03G0448800	4.17024	5.49294e-33	4.71632e-32	32.2602	31.3264	189
Chr1A	300299908	300300008	CK_peak_105	33.2065	+	1	100	0	TraesCS1A03G0449900	5.54735	4.93561e-11	1.00889e-10	10.3067	9.99616	100
Chr1A	300308751	300308851	CK_peak_106	209.009	+	1	100	0	TraesCS1A03G0449900	3.72686	2.84318e-65	1.20768e-63	64.5462	62.918	100
Chr1A	300352823	300353048	CK_peak_107	44.753	+	1	225	0	TraesCS1A03G0450000	3.47721	1.22783e-14	3.37292e-14	13.9109	13.472	225
Chr1A	301397012	301397212	CK_peak_108	67.147	+	1	200	0	TraesCS1A03G0451800	4.81109	1.39061e-21	6.11991e-21	20.8568	20.2133	200
Chr1A	301836332	301837327	CK_peak_109	11.6767	+	2	68,7	0,988	TraesCS1A03G0452600	6.80847	0.000293056	0.000305476	3.53305	3.51502	995
Chr1A	307320938	307320988	CK_peak_110	39.2128	+	1	50	0	TraesCS1A03G0461300	3.649	6.5607e-13	1.56957e-12	12.183	11.8042	50
Chr1A	307824437	307824562	CK_peak_111	36.3203	+	1	125	0	TraesCS1A03G0461600	4.27739	5.25299e-12	1.16547e-11	11.2796	10.9335	125
Chr1A	309906718	309906893	CK_peak_112	24.3719	+	1	175	0	TraesCS1A03G0464100	3.61724	2.91902e-08	4.60597e-08	7.53476	7.33668	175
Chr1A	311939973	311940098	CK_peak_113	51.0734	+	1	125	0	TraesCS1A03G0469000	3.51394	1.33493e-16	4.22069e-16	15.8745	15.3746	125
Chr1A	311940148	311940242	CK_peak_114	19.6434	+	1	94	0	TraesCS1A03G0469000	3.70195	9.08965e-07	1.22111e-06	6.04145	5.91325	94
Chr1A	322524714	322524836	CK_peak_115	38.6408	+	1	122	0	TraesCS1A03G0480400LC	4.15484	9.9117e-13	2.33318e-12	12.0039	11.6321	122
Chr1A	327804487	327804537	CK_peak_116	30.7716	+	1	50	0	TraesCS1A03G0486900	3.36562	2.8664e-10	5.45554e-10	9.54266	9.26316	50
Chr1A	327804562	327804637	CK_peak_117	29.1884	+	1	75	0	TraesCS1A03G0486900	3.58039	9.00743e-10	1.63459e-09	9.0454	8.78659	75
Chr1A	327804912	327805162	CK_peak_118	41.4282	+	1	250	0	TraesCS1A03G0486900	3.82026	1.33439e-13	3.37952e-13	12.8747	12.4711	250
Chr1A	328602213	328602438	CK_peak_119	129.643	+	1	225	0	TraesCS1A03G0487400,TraesCS1A03G0487700	4.42934	7.37282e-41	9.40822e-40	40.1324	39.0265	225
Chr1A	329114271	329114521	CK_peak_120	199.192	+	1	250	0	TraesCS1A03G0488800,TraesCS1A03G0488900	6.42777	3.02836e-62	1.08914e-60	61.5188	59.9629	250
Chr1A	329122397	329122521	CK_peak_121	22.8348	+	1	124	0	TraesCS1A03G0489000	3.45458	8.90707e-08	1.33672e-07	7.05027	6.87396	124
Chr1A	329836829	329837129	CK_peak_122	75.6458	+	1	300	0	TraesCS1A03G0489900	4.44212	3.24738e-24	1.69181e-23	23.4885	22.7716	300
Chr1A	335441065	335441165	CK_peak_123	26.3477	+	1	100	0	TraesCS1A03G0494600	3.99142	7.01005e-09	1.17095e-08	8.15428	7.93146	100
Chr1A	337379371	337379596	CK_peak_124	162.739	+	1	225	0	TraesCS1A03G0499300,TraesCS1A03G0499400	4.8615	4.88727e-51	1.02512e-49	50.3109	48.9892	225
Chr1A	343434677	343434827	CK_peak_125	25.3975	+	1	150	0	TraesCS1A03G0506600	3.78588	1.39126e-08	2.26248e-08	7.85659	7.64542	150
Chr1A	343951614	343951714	CK_peak_126	18.8855	+	1	100	0	TraesCS1A03G0507400	3.49677	1.57554e-06	2.06493e-06	5.80257	5.68509	100
Chr1A	349166481	349166606	CK_peak_127	143.138	+	1	125	0	TraesCS1A03G0515200	3.5575	5.11431e-45	8.14923e-44	44.2912	43.0889	125
Chr1A	352289141	352289341	CK_peak_128	226.201	+	1	200	0	TraesCS1A03G0519800	3.48063	1.44445e-70	8.06829e-69	69.8403	68.0932	200
Chr1A	352881088	352881163	CK_peak_129	18.9415	+	1	75	0	TraesCS1A03G0520500	4.58009	1.51186e-06	1.98625e-06	5.82049	5.70197	75
Chr1A	354774671	354774746	CK_peak_130	12.9784	+	1	75	0	TraesCS1A03G0525100	5.34091	0.000114936	0.000123915	3.93955	3.90688	75
Chr1A	355437680	355437730	CK_peak_131	37.5343	+	1	50	0	TraesCS1A03G0526600	3.74528	2.18989e-12	5.02386e-12	11.6596	11.299	50
Chr1A	356839062	356839237	CK_peak_132	21.2779	+	1	175	0	TraesCS1A03G0528800,TraesCS1A03G0528900	5.61833	2.76226e-07	3.93293e-07	6.55874	6.40528	175
Chr1A	357141281	357141481	CK_peak_133	48.6703	+	1	200	0	TraesCS1A03G0529400	4.33506	7.42519e-16	2.23239e-15	15.1293	14.6512	200
Chr1A	357901063	357901163	CK_peak_134	11.2329	+	1	100	0	TraesCS1A03G0530600	3.70434	0.000402985	0.000415492	3.39471	3.38144	100
Chr1A	357984118	357984343	CK_peak_135	117.862	+	1	225	0	TraesCS1A03G0531000	4.1847	3.07248e-37	3.31111e-36	36.5125	35.48	225
Chr1A	366512852	366513002	CK_peak_136	41.1522	+	1	150	0	TraesCS1A03G0542000	3.8398	1.62893e-13	4.09218e-13	12.7881	12.388	150
Chr1A	369625191	369625291	CK_peak_137	13.4053	+	1	100	0	TraesCS1A03G0546300	4.49558	8.43958e-05	9.21753e-05	4.07368	4.03539	100
Chr1A	369627021	369627196	CK_peak_138	39.6013	+	1	175	0	TraesCS1A03G0546300	3.36015	4.95899e-13	1.19898e-12	12.3046	11.9212	175
Chr1A	369788659	369788734	CK_peak_139	27.7933	+	1	75	0	TraesCS1A03G0546600	3.39487	2.46997e-09	4.29911e-09	8.60731	8.36662	75
Chr1A	370169734	370169859	CK_peak_140	19.8516	+	1	125	0	TraesCS1A03G0547200	4.27739	7.80482e-07	1.05698e-06	6.10764	5.97593	125
Chr1A	370238703	370238871	CK_peak_141	29.3159	+	1	168	0	TraesCS1A03G0547700	4.08851	8.21018e-10	1.49632e-09	9.08565	8.82498	168
Chr1A	370475715	370475940	CK_peak_142	65.2593	+	1	225	0	TraesCS1A03G0548300	4.79071	5.31949e-21	2.26457e-20	20.2741	19.645	225
Chr1A	370506726	370506776	CK_peak_143	14.5887	+	1	50	0	TraesCS1A03G0548400	4.23414	3.57656e-05	4.05856e-05	4.44654	4.39163	50
Chr1A	371511046	371511296	CK_peak_144	80.325	+	1	250	0	TraesCS1A03G0551300	4.22805	1.16359e-25	6.60347e-25	24.9342	24.1802	250
Chr1A	378525202	378525327	CK_peak_145	22.6878	+	1	125	0	TraesCS1A03G0562200	3.62768	9.90453e-08	1.48015e-07	7.00417	6.8297	125
Chr1A	382471602	382471777	CK_peak_146	57.848	+	1	175	0	TraesCS1A03G0568200	4.70201	1.05873e-18	3.85496e-18	17.9752	17.414	175
Chr1A	385955442	385955592	CK_peak_147	16.6463	+	1	150	0	TraesCS1A03G0571800	3.35201	8.00163e-06	9.74886e-06	5.09682	5.01105	150
Chr1A	387521737	387521937	CK_peak_148	67.956	+	1	200	0	TraesCS1A03G0573400	3.91799	7.81583e-22	3.49307e-21	21.107	20.4568	200
Chr1A	388976111	388976186	CK_peak_149	20.4388	+	1	75	0	TraesCS1A03G0575100	3.73914	5.09289e-07	7.03583e-07	6.29304	6.15268	75
Chr1A	388979535	388979633	CK_peak_150	31.3203	+	1	98	0	TraesCS1A03G0575100	3.71783	1.92966e-10	3.72945e-10	9.71452	9.42836	98
Chr1A	390675778	390675872	CK_peak_151	30.7	+	1	94	0	TraesCS1A03G0577200	3.35048	3.02121e-10	5.73301e-10	9.51982	9.24162	94
Chr1A	391702336	391702561	CK_peak_152	56.9823	+	1	225	0	TraesCS1A03G0578400	4.43768	1.97071e-18	7.02464e-18	17.7054	17.1534	225
Chr1A	393379002	393379252	CK_peak_153	104.555	+	1	250	0	TraesCS1A03G0580200	4.14518	3.87158e-33	3.35632e-32	32.4121	31.4741	250
Chr1A	396855600	396855800	CK_peak_154	76.8275	+	1	200	0	TraesCS1A03G0587800	4.10742	1.40168e-24	7.45786e-24	23.8534	23.1274	200
Chr1A	400900411	400900624	CK_peak_155	111.228	+	1	213	0	TraesCS1A03G0593200LC,TraesCS1A03G0593300	4.82348	3.4042e-35	3.28965e-34	34.468	33.4829	213
Chr1A	401541158	401541458	CK_peak_156	30.4349	+	1	300	0	TraesCS1A03G0594700LC	8.92311	3.66006e-10	6.88956e-10	9.43651	9.16181	300
Chr1A	403911031	403911131	CK_peak_157	17.3275	+	1	100	0	TraesCS1A03G0597000	4.67567	4.88388e-06	6.08003e-06	5.31124	5.21609	100
Chr1A	404578970	404579170	CK_peak_158	100.439	+	1	200	0	TraesCS1A03G0597600	4.33235	7.12399e-32	5.81958e-31	31.1473	30.2351	200
Chr1A	410118160	410118285	CK_peak_159	35.7056	+	1	125	0	TraesCS1A03G0606500	3.47671	8.18162e-12	1.7846e-11	11.0872	10.7485	125
Chr1A	411457993	411458115	CK_peak_160	69.022	+	1	122	0	TraesCS1A03G0607800	3.68314	3.64781e-22	1.66843e-21	21.438	20.7777	122
Chr1A	411775190	411775365	CK_peak_161	93.2689	+	1	175	0	TraesCS1A03G0608300	3.79153	1.15688e-29	8.38064e-29	28.9367	28.0767	175
Chr1A	427585998	427586248	CK_peak_162	126.456	+	1	250	0	TraesCS1A03G0622000	4.98616	7.02936e-40	8.5684e-39	39.1531	38.0671	250
Chr1A	428150437	428150562	CK_peak_163	27.1426	+	1	125	0	TraesCS1A03G0622400	4.25818	3.95212e-09	6.74945e-09	8.40317	8.17073	125
Chr1A	430400818	430400986	CK_peak_164	178.089	+	1	168	0	TraesCS1A03G0625600	3.94806	9.28479e-56	2.45379e-54	55.0322	53.6102	168
Chr1A	430833640	430833790	CK_peak_165	32.6645	+	1	150	0	TraesCS1A03G0626000	3.66097	7.30469e-11	1.46893e-10	10.1364	9.833	150
Chr1A	432432819	432432994	CK_peak_166	17.6194	+	1	175	0	TraesCS1A03G0628100	4.91956	3.94874e-06	4.96613e-06	5.40354	5.30398	175
Chr1A	432441948	432442148	CK_peak_167	202.95	+	1	200	0	TraesCS1A03G0628200LC	3.8114	2.08087e-63	8.05359e-62	62.6818	61.094	200
Chr1A	432442248	432442298	CK_peak_168	11.4903	+	1	50	0	TraesCS1A03G0628200LC	4.92511	0.00033499	0.000347595	3.47497	3.45893	50
Chr1A	433615438	433615563	CK_peak_169	23.2114	+	1	125	0	TraesCS1A03G0629600	3.37742	6.77887e-08	1.02959e-07	7.16884	6.98733	125
Chr1A	434034089	434034264	CK_peak_170	89.4652	+	1	175	0	TraesCS1A03G0630100	4.13594	1.72902e-28	1.17026e-27	27.7622	26.9317	175
Chr1A	434602045	434602245	CK_peak_171	21.9945	+	1	200	0	TraesCS1A03G0632000	4.27261	1.63583e-07	2.39325e-07	6.78626	6.62101	200
Chr1A	436501153	436501316	CK_peak_172	35.8356	+	1	163	0	TraesCS1A03G0634400	3.6099	7.44225e-12	1.63079e-11	11.1283	10.7876	163
Chr1A	438273667	438273935	CK_peak_173	62.8391	+	1	268	0	TraesCS1A03G0637200,TraesCS1A03G0637300	6.44749	2.98566e-20	1.21215e-19	19.525	18.9164	268
Chr1A	438286082	438286182	CK_peak_174	34.4356	+	1	100	0	TraesCS1A03G0637400	4.45453	2.03439e-11	4.30388e-11	10.6916	10.3661	100
Chr1A	440143015	440143065	CK_peak_175	28.0701	+	1	50	0	TraesCS1A03G0638500	3.73319	2.01809e-09	3.54864e-09	8.69506	8.44994	50
Chr1A	441861728	441862047	CK_peak_176	102.604	+	1	319	0	TraesCS1A03G0642300	5.26944	1.53829e-32	1.29742e-31	31.813	30.8869	319
Chr1A	444382638	444382688	CK_peak_177	13.4169	+	1	50	0	TraesCS1A03G0647900,TraesCS1A03G0648000	5.08528	8.36838e-05	9.1437e-05	4.07736	4.03888	50
Chr1A	444382963	444383228	CK_peak_178	62.2123	+	1	265	0	TraesCS1A03G0647900,TraesCS1A03G0648000	6.59064	4.67526e-20	1.8717e-19	19.3302	18.7278	265
Chr1A	444389829	444390029	CK_peak_179	68.2756	+	1	200	0	TraesCS1A03G0648200LC	6.32079	6.22411e-22	2.79892e-21	21.2059	20.553	200
Chr1A	445939857	445940182	CK_peak_180	325.716	+	1	325	0	TraesCS1A03G0650500	5.43682	4.08927e-101	8.90819e-99	100.388	98.0502	325
Chr1A	447689955	447690124	CK_peak_181	62.2108	+	1	169	0	TraesCS1A03G0653300	4.07538	4.68115e-20	1.87356e-19	19.3296	18.7273	169
Chr1A	450714745	450714920	CK_peak_182	56.5642	+	1	175	0	TraesCS1A03G0657800	3.60971	2.65478e-18	9.38622e-18	17.576	17.0275	175
Chr1A	450720512	450720737	CK_peak_183	166.546	+	1	225	0	TraesCS1A03G0657900	4.08767	3.33173e-52	7.32068e-51	51.4773	50.1354	225
Chr1A	451296544	451297059	CK_peak_184	17.4244	+	2	14110	0,405	TraesCS1A03G0659600LC,TraesCS1A03G0659700	8.49014	4.55257e-06	5.68522e-06	5.34174	5.24525	515
Chr1A	451716559	451716684	CK_peak_185	17.1217	+	1	125	0	TraesCS1A03G0661700	4.10531	5.66528e-06	7.01216e-06	5.24678	5.15415	125
Chr1A	451720361	451720436	CK_peak_186	27.3159	+	1	75	0	TraesCS1A03G0661700	3.68534	3.48985e-09	5.98546e-09	8.45719	8.2229	75
Chr1A	453820420	453820495	CK_peak_187	15.0069	+	1	75	0	TraesCS1A03G0663200	3.43841	2.64188e-05	3.03725e-05	4.57809	4.51752	75
Chr1A	453820520	453820595	CK_peak_188	24.9826	+	1	75	0	TraesCS1A03G0663200	3.8451	1.87953e-08	3.0163e-08	7.72595	7.52053	75
Chr1A	456099022	456099072	CK_peak_189	16.7222	+	1	50	0	TraesCS1A03G0666500	5.08433	7.56911e-06	9.24925e-06	5.12095	5.03389	50
Chr1A	456103925	456104075	CK_peak_190	32.6769	+	1	150	0	TraesCS1A03G0666800	4.76352	7.23721e-11	1.45632e-10	10.1404	9.83674	150
Chr1A	456290909	456290984	CK_peak_191	17.2944	+	1	75	0	TraesCS1A03G0667200	8.3823	5.00252e-06	6.22112e-06	5.30081	5.20613	75
Chr1A	456792069	456792269	CK_peak_192	125.087	+	1	200	0	TraesCS1A03G0667800	3.46686	1.85565e-39	2.21415e-38	38.7315	37.6548	200
Chr1A	460248043	460248182	CK_peak_193	68.7413	+	1	139	0	TraesCS1A03G0671100	3.33862	4.46179e-22	2.02674e-21	21.3505	20.6932	139
Chr1A	460303339	460303453	CK_peak_194	27.1096	+	1	114	0	TraesCS1A03G0671300	4.73709	4.04673e-09	6.90562e-09	8.3929	8.1608	114
Chr1A	463052777	463052927	CK_peak_195	101.443	+	1	150	0	TraesCS1A03G0676100	4.17045	3.50024e-32	2.90082e-31	31.4559	30.5375	150
Chr1A	463087935	463087985	CK_peak_196	14.7993	+	1	50	0	TraesCS1A03G0676500	6.51759	3.07048e-05	3.50725e-05	4.51279	4.45503	50
Chr1A	465526249	465526424	CK_peak_197	64.257	+	1	175	0	TraesCS1A03G0682400	3.80355	1.08763e-20	4.53646e-20	19.9635	19.3433	175
Chr1A	466486494	466486694	CK_peak_198	32.7187	+	1	200	0	TraesCS1A03G0685100	4.28145	7.01596e-11	1.41479e-10	10.1539	9.84931	200
Chr1A	467157249	467157449	CK_peak_199	48.9895	+	1	200	0	TraesCS1A03G0687700	4.7087	5.91184e-16	1.78939e-15	15.2283	14.7473	200
Chr1A	467188508	467188608	CK_peak_200	13.8589	+	1	100	0	TraesCS1A03G0688000	4.20276	6.07545e-05	6.73044e-05	4.21642	4.17196	100
Chr1A	467192607	467192657	CK_peak_201	25.1922	+	1	50	0	TraesCS1A03G0688000	4.69508	1.61348e-08	2.60856e-08	7.79224	7.5836	50
Chr1A	468584143	468584193	CK_peak_202	13.4724	+	1	50	0	TraesCS1A03G0690100	3.57766	8.03513e-05	8.79849e-05	4.09501	4.05559	50
Chr1A	468864900	468865065	CK_peak_203	46.6332	+	1	165	0	TraesCS1A03G0691100	4.86562	3.20012e-15	9.16233e-15	14.4948	14.038	165
Chr1A	474671878	474672003	CK_peak_204	78.9708	+	1	125	0	TraesCS1A03G0701100	3.7823	3.06992e-25	1.68818e-24	24.5129	23.7726	125
Chr1A	481424332	481424432	CK_peak_205	11.8849	+	1	100	0	TraesCS1A03G0710500	3.56279	0.000252664	0.000264421	3.59746	3.5777	100
Chr1A	482032198	482032398	CK_peak_206	39.4655	+	1	200	0	TraesCS1A03G0711700	3.75603	5.46946e-13	1.31739e-12	12.2621	11.8803	200
Chr1A	482153244	482153394	CK_peak_207	29.1696	+	1	150	0	TraesCS1A03G0712000	4.05516	9.13452e-10	1.65607e-09	9.03931	8.78092	150
Chr1A	482433243	482433318	CK_peak_208	16.9104	+	1	75	0	TraesCS1A03G0714500	7.00891	6.6054e-06	8.11846e-06	5.1801	5.09053	75
Chr1A	482433393	482433668	CK_peak_209	84.8731	+	1	275	0	TraesCS1A03G0714500,TraesCS1A03G0714700LC	5.89377	4.53677e-27	2.82257e-26	26.3433	25.5494	275
Chr1A	487920422	487920561	CK_peak_210	26.8001	+	1	139	0	TraesCS1A03G0725700	3.77956	5.05761e-09	8.55787e-09	8.29605	8.06763	139
Chr1A	488471971	488472146	CK_peak_211	33.9573	+	1	175	0	TraesCS1A03G0728000	3.82705	2.8717e-11	5.99542e-11	10.5419	10.2222	175
Chr1A	489129823	489129973	CK_peak_212	22.9554	+	1	150	0	TraesCS1A03G0730000LC	4.42351	8.16363e-08	1.2295e-07	7.08812	6.91027	150
Chr1A	489640770	489640957	CK_peak_213	197.228	+	1	187	0	TraesCS1A03G0731300	4.17476	1.232e-61	4.25039e-60	60.9094	59.3716	187
Chr1A	494745571	494745871	CK_peak_214	52.9854	+	1	300	0	TraesCS1A03G0742600	4.19626	3.39195e-17	1.12151e-16	16.4696	15.9502	300
Chr1A	494751517	494751592	CK_peak_215	18.8413	+	1	75	0	TraesCS1A03G0742700	4.03727	1.62774e-06	2.12913e-06	5.78842	5.6718	75
Chr1A	495349791	495349966	CK_peak_216	64.226	+	1	175	0	TraesCS1A03G0744900	3.92302	1.11156e-20	4.635e-20	19.9541	19.334	175
Chr1A	496968684	496968857	CK_peak_217	42.6071	+	1	173	0	TraesCS1A03G0749100	3.87646	5.72193e-14	1.49279e-13	13.2425	12.826	173
Chr1A	497223747	497223947	CK_peak_218	72.5823	+	1	200	0	TraesCS1A03G0749900	4.02116	2.87897e-23	1.41435e-22	22.5408	21.8494	200
Chr1A	497814035	497814210	CK_peak_219	49.7975	+	1	175	0	TraesCS1A03G0752900	3.63072	3.32686e-16	1.02198e-15	15.478	14.9906	175
Chr1A	497814235	497814285	CK_peak_220	15.812	+	1	50	0	TraesCS1A03G0752900	4.16377	1.46977e-05	1.73822e-05	4.83275	4.7599	50
Chr1A	498590888	498591013	CK_peak_221	20.311	+	1	125	0	TraesCS1A03G0754600	4.80033	5.59217e-07	7.68727e-07	6.25242	6.11423	125
Chr1A	499408456	499408506	CK_peak_222	25.653	+	1	50	0	TraesCS1A03G0758500	5.46958	1.15625e-08	1.89524e-08	7.93695	7.72233	50
Chr1A	499647081	499647331	CK_peak_223	108.933	+	1	250	0	TraesCS1A03G0760300	4.38199	1.72786e-34	1.61447e-33	33.7625	32.792	250
Chr1A	500098025	500098088	CK_peak_224	11.2653	+	1	63	0	TraesCS1A03G0761800	4.32893	0.000393709	0.000406257	3.40482	3.3912	63
Chr1A	500687815	500688040	CK_peak_225	56.7596	+	1	225	0	TraesCS1A03G0764000	4.11365	2.30979e-18	8.19689e-18	17.6364	17.0864	225
Chr1A	503189375	503189500	CK_peak_226	20.0841	+	1	125	0	TraesCS1A03G0771200LC,TraesCS1A03G0771300LC	4.11154	6.59135e-07	8.99673e-07	6.18103	6.04592	125
Chr1A	504795948	504796298	CK_peak_227	71.7274	+	1	350	0	TraesCS1A03G0773400	6.99327	5.27575e-23	2.55803e-22	22.2777	21.5921	350
Chr1A	504853232	504853457	CK_peak_228	42.2679	+	1	225	0	TraesCS1A03G0773900	5.09106	7.3079e-14	1.88846e-13	13.1362	12.7239	225
Chr1A	509698269	509698344	CK_peak_229	14.8285	+	1	75	0	TraesCS1A03G0784800	3.88117	3.00641e-05	3.43689e-05	4.52195	4.46383	75
Chr1A	510451371	510452283	CK_peak_230	53.4175	+	2	68157	0,755	TraesCS1A03G0788500LC	5.0906	2.4933e-17	8.31228e-17	16.6032	16.0803	912
Chr1A	514120650	514120750	CK_peak_231	27.5808	+	1	100	0	TraesCS1A03G0796800	3.86638	2.88059e-09	4.98141e-09	8.54052	8.30265	100
Chr1A	518064793	518064916	CK_peak_232	37.8839	+	1	123	0	TraesCS1A03G0808300	3.67623	1.70364e-12	3.94275e-12	11.7686	11.4042	123
Chr1A	518119593	518119668	CK_peak_233	14.5001	+	1	75	0	TraesCS1A03G0808700	4.75104	3.8162e-05	4.31561e-05	4.41837	4.36496	75
Chr1A	518121229	518121379	CK_peak_234	73.4702	+	1	150	0	TraesCS1A03G0808700	3.6006	1.53223e-23	7.64308e-23	22.8147	22.1167	150
Chr1A	518315349	518315524	CK_peak_235	18.0713	+	1	175	0	TraesCS1A03G0809600	3.90199	2.84551e-06	3.63076e-06	5.54584	5.44	175
Chr1A	518458712	518458912	CK_peak_236	102.288	+	1	200	0	TraesCS1A03G0810700	4.19436	1.92341e-32	1.61509e-31	31.7159	30.7918	200
Chr1A	520996408	520996558	CK_peak_237	56.2705	+	1	150	0	TraesCS1A03G0819200	3.39002	3.27521e-18	1.15051e-17	17.4848	16.9391	150
Chr1A	520996583	520996683	CK_peak_238	24.4376	+	1	100	0	TraesCS1A03G0819200	3.66076	2.78209e-08	4.40084e-08	7.55563	7.35646	100
Chr1A	521008241	521008416	CK_peak_239	38.1546	+	1	175	0	TraesCS1A03G0819300	4.19573	1.40405e-12	3.26825e-12	11.8526	11.4857	175
Chr1A	521365664	521365882	CK_peak_240	191.227	+	1	218	0	TraesCS1A03G0820700	4.86409	8.65935e-60	2.72261e-58	59.0625	57.565	218
Chr1A	523019461	523019636	CK_peak_241	39.1357	+	1	175	0	TraesCS1A03G0826100	4.1573	6.93146e-13	1.65567e-12	12.1592	11.781	175
Chr1A	525819628	525819753	CK_peak_242	15.2769	+	1	125	0	TraesCS1A03G0831300LC	4.06662	2.17105e-05	2.51874e-05	4.66333	4.59882	125
Chr1A	528858801	528858876	CK_peak_243	27.3538	+	1	75	0	TraesCS1A03G0834600	4.59753	3.39559e-09	5.83035e-09	8.46909	8.23431	75
Chr1A	528862616	528862816	CK_peak_244	117.52	+	1	200	0	TraesCS1A03G0834600	3.94917	3.92074e-37	4.19855e-36	36.4066	35.3769	200
Chr1A	532897134	532897459	CK_peak_245	54.4783	+	1	325	0	TraesCS1A03G0843600	4.53892	1.17329e-17	3.98474e-17	16.9306	16.3996	325
Chr1A	534846287	534846387	CK_peak_246	20.6085	+	1	100	0	TraesCS1A03G0851700	4.64887	4.49879e-07	6.25475e-07	6.3469	6.20379	100
Chr1A	536770491	536770541	CK_peak_247	10.3815	+	1	50	0	TraesCS1A03G0858500	5.06689	0.000739155	0.000749626	3.13126	3.12516	50
Chr1A	538382460	538382660	CK_peak_248	24.2838	+	1	200	0	TraesCS1A03G0865500LC	8.13253	3.11183e-08	4.89603e-08	7.50698	7.31016	200
Chr1A	539216184	539216334	CK_peak_249	94.4417	+	1	150	0	TraesCS1A03G0868700	4.62023	5.04849e-30	3.71726e-29	29.2968	28.4298	150
Chr1A	539647496	539647621	CK_peak_250	32.1332	+	1	125	0	TraesCS1A03G0869800	3.55758	1.07119e-10	2.12303e-10	9.97013	9.67304	125
Chr1A	540570518	540570693	CK_peak_251	17.6769	+	1	175	0	TraesCS1A03G0870900	3.90569	3.78456e-06	4.77224e-06	5.42198	5.32128	175
Chr1A	541732317	541732392	CK_peak_252	26.8129	+	1	75	0	TraesCS1A03G0874000	4.32399	5.01167e-09	8.48202e-09	8.30002	8.0715	75
Chr1A	541806616	541806791	CK_peak_253	35.5435	+	1	175	0	TraesCS1A03G0874100	4.27414	9.19807e-12	1.99689e-11	11.0363	10.6996	175
Chr1A	541808296	541808444	CK_peak_254	19.3105	+	2	18,32	0,116	TraesCS1A03G0874200LC	4.21927	1.15655e-06	1.53801e-06	5.93684	5.81304	148
Chr1A	541811143	541811310	CK_peak_255	66.7846	+	1	167	0	TraesCS1A03G0874200LC	4.08428	1.80363e-21	7.86716e-21	20.7439	20.1042	167
Chr1A	541908653	541908728	CK_peak_256	24.4012	+	1	75	0	TraesCS1A03G0874700	3.56665	2.85734e-08	4.51333e-08	7.54404	7.3455	75
Chr1A	543888885	543888935	CK_peak_257	14.5058	+	1	50	0	TraesCS1A03G0881700	4.0748	3.80069e-05	4.2985e-05	4.42014	4.36668	50
Chr1A	543889010	543889060	CK_peak_258	17.2869	+	1	50	0	TraesCS1A03G0881700	6.11943	5.02965e-06	6.25333e-06	5.29846	5.20389	50
Chr1A	545363500	545363849	CK_peak_259	152.733	+	1	349	0	TraesCS1A03G0884800	4.54329	5.77889e-48	1.05409e-46	47.2382	45.9771	349
Chr1A	546210907	546211082	CK_peak_260	21.0558	+	1	175	0	TraesCS1A03G0888500	4.61796	3.24654e-07	4.58733e-07	6.48858	6.33844	175
Chr1A	546337622	546337697	CK_peak_261	14.481	+	1	75	0	TraesCS1A03G0889400	3.95208	3.87122e-05	4.37308e-05	4.41215	4.35921	75
Chr1A	547248829	547249004	CK_peak_262	67.9786	+	1	175	0	TraesCS1A03G0891800	3.45383	7.69195e-22	3.43871e-21	21.114	20.4636	175
Chr1A	549643072	549643172	CK_peak_263	22.5115	+	1	100	0	TraesCS1A03G0899300	5.28534	1.12618e-07	1.6725e-07	6.94839	6.77663	100
Chr1A	549723821	549723996	CK_peak_264	39.1585	+	1	175	0	TraesCS1A03G0900000	3.99879	6.8208e-13	1.62975e-12	12.1662	11.7879	175
Chr1A	550421406	550421572	CK_peak_265	31.7251	+	1	166	0	TraesCS1A03G0902700	3.94656	1.44222e-10	2.81702e-10	9.84097	9.55021	166
Chr1A	552226556	552227236	CK_peak_266	26.6047	+	2	32143	0,537	TraesCS1A03G0910500LC	5.6112	5.82203e-09	9.79928e-09	8.23493	8.00881	680
Chr1A	552317607	552317807	CK_peak_267	44.7667	+	1	200	0	TraesCS1A03G0910900	4.08492	1.21558e-14	3.34108e-14	13.9152	13.4761	200
Chr1A	553420566	553420641	CK_peak_268	17.7512	+	1	75	0	TraesCS1A03G0917300	3.69483	3.58653e-06	4.53266e-06	5.44532	5.34365	75
Chr1A	553520879	553521051	CK_peak_269	54.7159	+	1	172	0	TraesCS1A03G0917900	3.5662	9.90485e-18	3.37971e-17	17.0042	16.4711	172
Chr1A	553793473	553793723	CK_peak_270	106.495	+	1	250	0	TraesCS1A03G0919900	5.33248	9.69617e-34	8.74893e-33	33.0134	32.058	250
Chr1A	554079442	554079642	CK_peak_271	49.0573	+	1	200	0	TraesCS1A03G0920800	4.46509	5.63571e-16	1.70717e-15	15.2491	14.7677	200
Chr1A	557630550	557630790	CK_peak_272	67.9064	+	1	240	0	TraesCS1A03G0940900	3.52419	8.09414e-22	3.61533e-21	21.0918	20.4419	240
Chr1A	560669080	560669255	CK_peak_273	138.491	+	1	175	0	TraesCS1A03G0955000	3.71732	1.39136e-43	2.04204e-42	42.8566	41.6899	175
Chr1A	561054229	561054304	CK_peak_274	21.9871	+	1	75	0	TraesCS1A03G0956200	4.33208	1.64473e-07	2.40557e-07	6.78391	6.61878	75
Chr1A	564183001	564183216	CK_peak_275	77.865	+	1	215	0	TraesCS1A03G0966000	4.51973	6.72872e-25	3.63337e-24	24.1721	23.4397	215
Chr1A	565099159	565099484	CK_peak_276	105.139	+	1	325	0	TraesCS1A03G0968200	4.17658	2.5461e-33	2.23907e-32	32.5941	31.6499	325
Chr1A	565112541	565112716	CK_peak_277	23.2309	+	1	175	0	TraesCS1A03G0968400	3.53949	6.68384e-08	1.01576e-07	7.17497	6.99321	175
Chr1A	565356415	565356590	CK_peak_278	39.6776	+	1	175	0	TraesCS1A03G0969400	3.58035	4.69557e-13	1.13727e-12	12.3283	11.9441	175
Chr1A	565356640	565356715	CK_peak_279	32.0501	+	1	75	0	TraesCS1A03G0969400	3.40461	1.1388e-10	2.24884e-10	9.94355	9.64804	75
Chr1A	565882120	565882245	CK_peak_280	21.518	+	1	125	0	TraesCS1A03G0972300	5.16519	2.31851e-07	3.33004e-07	6.63479	6.47755	125
Chr1A	566472573	566472809	CK_peak_281	14.8555	+	2	104,46	0,190	TraesCS1A03G0975700	4.26912	2.94765e-05	3.37326e-05	4.53052	4.47195	236
Chr1A	566475174	566475438	CK_peak_282	149.127	+	1	264	0	TraesCS1A03G0975700	4.11997	7.46416e-47	1.28321e-45	46.127	44.8917	264
Chr1A	566505955	566506130	CK_peak_283	44.4788	+	1	175	0	TraesCS1A03G0975800	3.63663	1.49446e-14	4.07894e-14	13.8255	13.3895	175
Chr1A	568194725	568194925	CK_peak_284	64.2056	+	1	200	0	TraesCS1A03G0983600	6.35582	1.12796e-20	4.70082e-20	19.9477	19.3278	200
Chr1A	569783577	569783724	CK_peak_285	30.539	+	1	147	0	TraesCS1A03G0987600	4.05891	3.39305e-10	6.40989e-10	9.46941	9.19315	147
Chr1A	569820516	569820741	CK_peak_286	24.2275	+	1	225	0	TraesCS1A03G0987800	5.75547	3.24074e-08	5.09097e-08	7.48936	7.2932	225
Chr1A	569868615	569868715	CK_peak_287	29.3814	+	1	100	0	TraesCS1A03G0988100	3.90157	7.83734e-10	1.42991e-09	9.10583	8.84469	100
Chr1A	571203101	571203151	CK_peak_288	107.497	+	1	50	0	TraesCS1A03G0990000	3.36416	4.77531e-34	4.36563e-33	33.321	32.36	50
Chr1A	576999503	576999678	CK_peak_289	60.7801	+	1	175	0	TraesCS1A03G1009400	3.27289	1.30538e-19	5.05092e-19	18.8843	18.2966	175
Chr1A	577099752	577099802	CK_peak_290	14.3617	+	1	50	0	TraesCS1A03G1010500	4.97891	4.21955e-05	4.75004e-05	4.37473	4.3233	50
Chr1A	578695929	578695979	CK_peak_291	12.5581	+	1	50	0	TraesCS1A03G1017300	7.11601	0.000155519	0.000165816	3.80822	3.78037	50
Chr1A	578697650	578697825	CK_peak_292	157.912	+	1	175	0	TraesCS1A03G1017300	4.17139	1.48228e-49	2.90904e-48	48.8291	47.5362	175
Chr1A	580108350	580108500	CK_peak_293	27.3624	+	1	150	0	TraesCS1A03G1024200	4.61223	3.37412e-09	5.79544e-09	8.47184	8.23691	150
Chr1A	580539179	580539354	CK_peak_294	34.5447	+	1	175	0	TraesCS1A03G1025600	3.9756	1.88108e-11	3.99024e-11	10.7256	10.399	175
Chr1A	581225763	581225913	CK_peak_295	21.6842	+	1	150	0	TraesCS1A03G1027100	4.10188	2.05367e-07	2.96762e-07	6.68747	6.52759	150
Chr1A	581675935	581676235	CK_peak_296	65.5953	+	1	300	0	TraesCS1A03G1029500	3.87814	4.18132e-21	1.79406e-20	20.3787	19.7462	300
Chr1A	582667694	582667819	CK_peak_297	18.6609	+	1	125	0	TraesCS1A03G1031600	3.91195	1.85624e-06	2.4127e-06	5.73137	5.6175	125
Chr1A	584814056	584814231	CK_peak_298	26.7249	+	1	175	0	TraesCS1A03G1035600	6.05137	5.33699e-09	9.01559e-09	8.2727	8.04501	175
Chr1A	585946003	585946053	CK_peak_299	23.7362	+	1	50	0	TraesCS1A03G1039400	3.84602	4.6353e-08	7.1564e-08	7.33392	7.14531	50
Chr1A	587643582	587643782	CK_peak_300	28.0187	+	1	200	0	TraesCS1A03G1046900	4.60212	2.09562e-09	3.67735e-09	8.67869	8.43447	200
Chr1A	588236975	588237075	CK_peak_301	40.2436	+	1	100	0	TraesCS1A03G1050000	3.97388	3.12338e-13	7.682e-13	12.5054	12.1145	100
Chr1A	588845126	588845310	CK_peak_302	18.9934	+	2	65,10	0,174	TraesCS1A03G1052100	4.48807	1.45597e-06	1.91613e-06	5.83685	5.71758	184
Chr1A	593463312	593463412	CK_peak_303	82.8811	+	1	100	0	TraesCS1A03G1068000	3.32153	1.86213e-26	1.1228e-25	25.73	24.9497	100
Chr1A	593463462	593463512	CK_peak_304	19.7411	+	1	50	0	TraesCS1A03G1068000	4.70179	8.45938e-07	1.14116e-06	6.07266	5.94265	50
Chr1A	594001000	594001175	CK_peak_305	130.706	+	1	175	0	TraesCS1A03G1071000	4.47437	3.46192e-41	4.50434e-40	40.4607	39.3464	175
Chr1A	595113393	595113568	CK_peak_306	34.4429	+	1	175	0	TraesCS1A03G1077100	3.32298	2.02349e-11	4.28202e-11	10.6939	10.3684	175
Chr1A	597839567	597839879	CK_peak_307	59.7594	+	1	312	0	TraesCS1A03G1084700	4.90435	2.69485e-19	1.02478e-18	18.5695	17.9894	312
Chr1A	1230248	1230498	CK_peak_308	95.1906	-	1	250	0	TraesCS1A03G0005200	6.27199	2.96543e-30	2.21194e-29	29.5279	28.6552	250
Chr1A	1334685	1334735	CK_peak_309	15.5453	-	1	50	0	TraesCS1A03G0005600	8.07413	1.78541e-05	2.09123e-05	4.74826	4.6796	50
Chr1A	1334760	1334810	CK_peak_310	22.0409	-	1	50	0	TraesCS1A03G0005600	4.19756	1.58177e-07	2.31749e-07	6.80086	6.63498	50
Chr1A	1334885	1335010	CK_peak_311	38.2863	-	1	125	0	TraesCS1A03G0005600	3.60178	1.27767e-12	2.9832e-12	11.8936	11.5253	125
Chr1A	8996248	8996298	CK_peak_312	37.3031	-	1	50	0	TraesCS1A03G0033900	3.85678	2.58806e-12	5.89739e-12	11.587	11.2293	50
Chr1A	9578352	9578527	CK_peak_313	34.9164	-	1	175	0	TraesCS1A03G0037000	3.49835	1.44085e-11	3.08399e-11	10.8414	10.5109	175
Chr1A	10439522	10439722	CK_peak_314	60.9311	-	1	200	0	TraesCS1A03G0039500	4.34392	1.17091e-19	4.54909e-19	18.9315	18.3421	200
Chr1A	10949252	10949302	CK_peak_315	15.2578	-	1	50	0	TraesCS1A03G0043500	4.15482	2.20114e-05	2.55229e-05	4.65735	4.59307	50
Chr1A	10956404	10956604	CK_peak_316	157.363	-	1	200	0	TraesCS1A03G0043600	6.32678	2.18782e-49	4.25536e-48	48.66	47.3711	200
Chr1A	13309902	13310102	CK_peak_317	66.9171	-	1	200	0	TraesCS1A03G0055300LC	5.00378	1.63928e-21	7.17698e-21	20.7853	20.1441	200
Chr1A	13310152	13310327	CK_peak_318	44.7271	-	1	175	0	TraesCS1A03G0055300LC	3.59071	1.25144e-14	3.43408e-14	13.9026	13.4642	175
Chr1A	13540430	13540555	CK_peak_319	45.9674	-	1	125	0	TraesCS1A03G0056600	4.27957	5.1475e-15	1.4536e-14	14.2884	13.8376	125
Chr1A	13649818	13649993	CK_peak_320	12.7894	-	1	175	0	TraesCS1A03G0058100	7.19424	0.000131603	0.000141255	3.88073	3.85	175
Chr1A	20175723	20175773	CK_peak_321	10.4402	-	1	50	0	TraesCS1A03G0081100LC,TraesCS1A03G0081200	4.09057	0.000709155	0.000719775	3.14926	3.1428	50
Chr1A	21790124	21790199	CK_peak_322	50.8118	-	1	75	0	TraesCS1A03G0083300	3.69386	1.60925e-16	5.05969e-16	15.7934	15.2959	75
Chr1A	21792343	21792491	CK_peak_323	19.9593	-	1	148	0	TraesCS1A03G0083300	5.46846	7.2158e-07	9.80955e-07	6.14172	6.00835	148
Chr1A	24231599	24231649	CK_peak_324	39.7217	-	1	50	0	TraesCS1A03G0096700	3.55475	4.546e-13	1.10297e-12	12.3424	11.9574	50
Chr1A	26026542	26026642	CK_peak_325	37.3974	-	1	100	0	TraesCS1A03G0103400	4.06954	2.41483e-12	5.52412e-12	11.6171	11.2577	100
Chr1A	29107562	29107837	CK_peak_326	210.264	-	1	275	0	TraesCS1A03G0108500	4.77291	1.16199e-65	5.06263e-64	64.9348	63.2956	275
Chr1A	35556990	35557065	CK_peak_327	34.2588	-	1	75	0	TraesCS1A03G0127800	3.78479	2.31305e-11	4.86506e-11	10.6358	10.3129	75
Chr1A	37273244	37273419	CK_peak_328	42.3273	-	1	175	0	TraesCS1A03G0130600LC	3.84993	7.00221e-14	1.81223e-13	13.1548	12.7418	175
Chr1A	38548790	38548865	CK_peak_329	18.8288	-	1	75	0	TraesCS1A03G0135500	3.5548	1.64302e-06	2.14764e-06	5.78436	5.66804	75
Chr1A	39051384	39051509	CK_peak_330	16.7581	-	1	125	0	TraesCS1A03G0138200	3.83134	7.37811e-06	9.02236e-06	5.13205	5.04468	125
Chr1A	54581524	54581699	CK_peak_331	46.374	-	1	175	0	TraesCS1A03G0170500	3.89036	3.84999e-15	1.09654e-14	14.4145	13.96	175
Chr1A	55549670	55549720	CK_peak_332	11.3722	-	1	50	0	TraesCS1A03G0172300	4.74792	0.000364652	0.000377244	3.43812	3.42338	50
Chr1A	56528707	56528882	CK_peak_333	69.4845	-	1	175	0	TraesCS1A03G0175300	3.78989	2.62186e-22	1.21081e-21	21.5814	20.9169	175
Chr1A	56533797	56533872	CK_peak_334	14.5174	-	1	75	0	TraesCS1A03G0175300	7.76967	3.7678e-05	4.26415e-05	4.42391	4.37017	75
Chr1A	59798188	59798338	CK_peak_335	22.0386	-	1	150	0	TraesCS1A03G0179100	4.46928	1.58443e-07	2.32117e-07	6.80013	6.63429	150
Chr1A	60689393	60689468	CK_peak_336	13.7886	-	1	75	0	TraesCS1A03G0182400	3.876	6.3921e-05	7.06686e-05	4.19436	4.15077	75
Chr1A	61384467	61384642	CK_peak_337	19.6593	-	1	175	0	TraesCS1A03G0185800	5.75385	8.98525e-07	1.20772e-06	6.04647	5.91803	175
Chr1A	62333266	62333541	CK_peak_338	203.866	-	1	275	0	TraesCS1A03G0188200	3.99861	1.08039e-63	4.26809e-62	62.9664	61.3698	275
Chr1A	62819333	62819408	CK_peak_339	34.6298	-	1	75	0	TraesCS1A03G0189800	4.09542	1.76855e-11	3.76183e-11	10.7524	10.4246	75
Chr1A	63846637	63846887	CK_peak_340	34.6815	-	1	250	0	TraesCS1A03G0192800	5.52047	1.70391e-11	3.6294e-11	10.7686	10.4402	250
Chr1A	65777485	65777535	CK_peak_341	13.8818	-	1	50	0	TraesCS1A03G0195000	6.32178	5.97201e-05	6.62452e-05	4.22388	4.17885	50
Chr1A	65912136	65912261	CK_peak_342	17.226	-	1	125	0	TraesCS1A03G0195200	4.09203	5.25817e-06	6.52309e-06	5.27917	5.18555	125
Chr1A	67802422	67802497	CK_peak_343	20.603	-	1	75	0	TraesCS1A03G0200400	5.82169	4.51696e-07	6.27886e-07	6.34515	6.20212	75
Chr1A	68166348	68166423	CK_peak_344	20.6447	-	1	75	0	TraesCS1A03G0200700	4.4871	4.38096e-07	6.09982e-07	6.35843	6.21468	75
Chr1A	68196469	68196644	CK_peak_345	53.1959	-	1	175	0	TraesCS1A03G0200900	4.19615	2.91867e-17	9.69224e-17	16.5348	16.0136	175
Chr1A	71576712	71576962	CK_peak_346	46.8075	-	1	250	0	TraesCS1A03G0204800	4.63045	2.82321e-15	8.11978e-15	14.5493	14.0905	250
Chr1A	78840964	78841139	CK_peak_347	92.5254	-	1	175	0	TraesCS1A03G0214000	4.17689	1.97179e-29	1.40307e-28	28.7051	27.8529	175
Chr1A	78850328	78850503	CK_peak_348	11.8519	-	1	175	0	TraesCS1A03G0214200	4.01561	0.00025875	0.00027053	3.58712	3.56778	175
Chr1A	81307399	81307499	CK_peak_349	29.1497	-	1	100	0	TraesCS1A03G0217500	4.49601	9.26766e-10	1.67901e-09	9.03303	8.77495	100
Chr1A	82021084	82021284	CK_peak_350	116.692	-	1	200	0	TraesCS1A03G0218100	4.0706	7.06075e-37	7.45117e-36	36.1511	35.1278	200
Chr1A	86122364	86122414	CK_peak_351	13.591	-	1	50	0	TraesCS1A03G0221900	3.51845	7.37509e-05	8.10426e-05	4.13223	4.09129	50
Chr1A	87327535	87327735	CK_peak_352	46.9732	-	1	200	0	TraesCS1A03G0224200LC	5.08479	2.50543e-15	7.2386e-15	14.6011	14.1403	200
Chr1A	88922885	88923010	CK_peak_353	28.9785	-	1	125	0	TraesCS1A03G0227100	3.86084	1.04766e-09	1.89063e-09	8.97978	8.72339	125
Chr1A	93024436	93024586	CK_peak_354	44.4563	-	1	150	0	TraesCS1A03G0230500	4.04209	1.51876e-14	4.14303e-14	13.8185	13.3827	150
Chr1A	93766298	93766598	CK_peak_355	109.604	-	1	300	0	TraesCS1A03G0232200	4.27586	1.07489e-34	1.01367e-33	33.9686	32.9941	300
Chr1A	95937939	95938114	CK_peak_356	77.4496	-	1	175	0	TraesCS1A03G0233900	3.15902	9.04023e-25	4.8455e-24	24.0438	23.3147	175
Chr1A	98087522	98087697	CK_peak_357	29.5522	-	1	175	0	TraesCS1A03G0242100	4.15628	6.92182e-10	1.27032e-09	9.15978	8.89609	175
Chr1A	98718144	98718294	CK_peak_358	28.1222	-	1	150	0	TraesCS1A03G0244400	3.74909	1.94337e-09	3.42278e-09	8.71144	8.46562	150
Chr1A	99872033	99872108	CK_peak_359	15.6178	-	1	75	0	TraesCS1A03G0245600	3.79298	1.69361e-05	1.98874e-05	4.77119	4.70142	75
Chr1A	100467432	100467582	CK_peak_360	42.6516	-	1	150	0	TraesCS1A03G0247700	5.26487	5.54333e-14	1.44744e-13	13.2562	12.8394	150
Chr1A	103219939	103220114	CK_peak_361	47.5406	-	1	175	0	TraesCS1A03G0255300	3.53847	1.66582e-15	4.88502e-15	14.7784	14.3111	175
Chr1A	104210862	104211087	CK_peak_362	87.7199	-	1	225	0	TraesCS1A03G0256600	3.8289	5.98465e-28	3.92347e-27	27.223	26.4063	225
Chr1A	105147818	105147993	CK_peak_363	273.592	-	1	175	0	TraesCS1A03G0257200	6.3955	3.92815e-85	4.37229e-83	84.4058	82.3593	175
Chr1A	106770784	106771084	CK_peak_364	145.954	-	1	300	0	TraesCS1A03G0259500	5.00967	7.01853e-46	1.15703e-44	45.1538	43.9367	300
Chr1A	108048253	108048478	CK_peak_365	159.966	-	1	225	0	TraesCS1A03G0260200	4.74896	3.45883e-50	7.00447e-49	49.4611	48.1546	225
Chr1A	115725216	115725391	CK_peak_366	79.3347	-	1	175	0	TraesCS1A03G0271800	3.33844	2.36664e-25	1.31185e-24	24.6259	23.8821	175
Chr1A	117549143	117549293	CK_peak_367	79.0139	-	1	150	0	TraesCS1A03G0273500	4.83556	2.9784e-25	1.63844e-24	24.526	23.7856	150
Chr1A	119367515	119367615	CK_peak_368	11.3482	-	1	100	0	TraesCS1A03G0277400	3.73265	0.000371021	0.000383573	3.4306	3.41615	100
Chr1A	121309350	121309550	CK_peak_369	115.623	-	1	200	0	TraesCS1A03G0280800	4.09352	1.50803e-36	1.56329e-35	35.8216	34.806	200
Chr1A	126320767	126320941	CK_peak_370	59.0264	-	1	174	0	TraesCS1A03G0286700	4.1216	4.56389e-19	1.70325e-18	18.3407	17.7687	174
Chr1A	129198024	129198124	CK_peak_371	18.7744	-	1	100	0	TraesCS1A03G0290300	3.74131	1.71013e-06	2.23021e-06	5.76697	5.65165	100
Chr1A	129200341	129200491	CK_peak_372	12.8729	-	1	150	0	TraesCS1A03G0290300	5.3058	0.000123916	0.000133314	3.90687	3.87512	150
Chr1A	133024992	133025092	CK_peak_373	28.4379	-	1	100	0	TraesCS1A03G0293900	4.82781	1.54789e-09	2.75006e-09	8.81026	8.56066	100
Chr1A	135267317	135267367	CK_peak_374	13.9474	-	1	50	0	TraesCS1A03G0296700	6.33288	5.69548e-05	6.3302e-05	4.24447	4.19858	50
Chr1A	137601045	137601220	CK_peak_375	28.8029	-	1	175	0	TraesCS1A03G0299700	4.44688	1.18955e-09	2.13531e-09	8.92462	8.67054	175
Chr1A	143550288	143550363	CK_peak_376	25.2364	-	1	75	0	TraesCS1A03G0304700	4.5219	1.56282e-08	2.52988e-08	7.80609	7.5969	75
Chr1A	149433297	149433347	CK_peak_377	48.8877	-	1	50	0	TraesCS1A03G0309300	3.52943	6.35877e-16	1.9201e-15	15.1966	14.7167	50
Chr1A	159855845	159856070	CK_peak_378	186.893	-	1	225	0	TraesCS1A03G0321300	5.7322	1.8505e-58	5.48993e-57	57.7327	56.2604	225
Chr1A	172982117	172982442	CK_peak_379	80.2649	-	1	325	0	TraesCS1A03G0330400	4.86185	1.21574e-25	6.88408e-25	24.9152	24.1622	325
Chr1A	173436934	173437309	CK_peak_380	94.617	-	1	375	0	TraesCS1A03G0330800	4.48745	4.45553e-30	3.29178e-29	29.3511	28.4826	375
Chr1A	177126067	177126267	CK_peak_381	51.6862	-	1	200	0	TraesCS1A03G0332500	3.85254	8.59697e-17	2.7599e-16	16.0657	15.5591	200
Chr1A	187234590	187234865	CK_peak_382	91.1678	-	1	275	0	TraesCS1A03G0339400	3.71399	5.17772e-29	3.5954e-28	28.2859	27.4443	275
Chr1A	187239289	187239364	CK_peak_383	18.8069	-	1	75	0	TraesCS1A03G0339400	3.55666	1.66956e-06	2.18045e-06	5.7774	5.66145	75
Chr1A	189078830	189079005	CK_peak_384	32.4265	-	1	175	0	TraesCS1A03G0341000	3.91937	8.67303e-11	1.73245e-10	10.0618	9.76134	175
Chr1A	203987532	203987707	CK_peak_385	18.6464	-	1	175	0	TraesCS1A03G0347000	4.57258	1.87601e-06	2.43715e-06	5.72677	5.61312	175
Chr1A	203987782	203987857	CK_peak_386	23.5722	-	1	75	0	TraesCS1A03G0347000	3.63587	5.22341e-08	8.01809e-08	7.28205	7.09593	75
Chr1A	204203153	204203228	CK_peak_387	17.0617	-	1	75	0	TraesCS1A03G0347400	5.71401	5.91702e-06	7.31011e-06	5.2279	5.13608	75
Chr1A	204203253	204203503	CK_peak_388	61.9482	-	1	250	0	TraesCS1A03G0347400	5.29587	5.65141e-20	2.24774e-19	19.2478	18.6483	250
Chr1A	205927773	205927998	CK_peak_389	36.599	-	1	225	0	TraesCS1A03G0348000LC	4.4771	4.30298e-12	9.60706e-12	11.3662	11.0174	225
Chr1A	208904029	208904104	CK_peak_390	10.7793	-	1	75	0	TraesCS1A03G0349500	4.1953	0.000557053	0.000568993	3.2541	3.24489	75
Chr1A	210309128	210309178	CK_peak_391	17.0086	-	1	50	0	TraesCS1A03G0350800	5.38125	6.14974e-06	7.5841e-06	5.21114	5.1201	50
Chr1A	211441697	211441822	CK_peak_392	196.395	-	1	125	0	TraesCS1A03G0352600	4.49258	2.21933e-61	7.57103e-60	60.6538	59.1208	125
Chr1A	214864690	214864740	CK_peak_393	26.8165	-	1	50	0	TraesCS1A03G0353900	4.66705	4.99883e-09	8.46122e-09	8.30113	8.07257	50
Chr1A	218393069	218393369	CK_peak_394	54.4682	-	1	300	0	TraesCS1A03G0357800	4.43908	1.18182e-17	4.01281e-17	16.9274	16.3966	300
Chr1A	221844678	221844853	CK_peak_395	18.3819	-	1	175	0	TraesCS1A03G0360600	4.05187	2.27221e-06	2.92742e-06	5.64355	5.53351	175
Chr1A	224289692	224289842	CK_peak_396	76.6913	-	1	150	0	TraesCS1A03G0362200	4.10869	1.54585e-24	8.19631e-24	23.8108	23.0864	150
Chr1A	225874059	225874234	CK_peak_397	38.9853	-	1	175	0	TraesCS1A03G0363800	3.52021	7.73164e-13	1.83759e-12	12.1117	11.7358	175
Chr1A	233980724	233980924	CK_peak_398	57.9655	-	1	200	0	TraesCS1A03G0369700	5.19033	9.72439e-19	3.55349e-18	18.0121	17.4493	200
Chr1A	236670767	236671067	CK_peak_399	82.8448	-	1	300	0	TraesCS1A03G0371500	4.12808	1.91342e-26	1.15145e-25	25.7182	24.9388	300
Chr1A	236680700	236680775	CK_peak_400	10.0955	-	1	75	0	TraesCS1A03G0371500	4.29492	0.00090631	0.000914042	3.04272	3.03903	75
Chr1A	245438824	245438999	CK_peak_401	33.5479	-	1	175	0	TraesCS1A03G0382100	3.90388	3.8628e-11	7.9632e-11	10.4131	10.0989	175
Chr1A	250405883	250406058	CK_peak_402	47.9355	-	1	175	0	TraesCS1A03G0386900,TraesCS1A03G0387000	4.03622	1.25639e-15	3.71509e-15	14.9009	14.43	175
Chr1A	253454048	253454223	CK_peak_403	33.5807	-	1	175	0	TraesCS1A03G0392000	4.4953	3.77187e-11	7.78417e-11	10.4234	10.1088	175
Chr1A	254393058	254393258	CK_peak_404	51.4245	-	1	200	0	TraesCS1A03G0393700	4.35828	1.03699e-16	3.30887e-16	15.9842	15.4803	200
Chr1A	254714059	254714159	CK_peak_405	29.051	-	1	100	0	TraesCS1A03G0394600	3.59016	9.94687e-10	1.79801e-09	9.00231	8.74521	100
Chr1A	255267789	255268014	CK_peak_406	84.303	-	1	225	0	TraesCS1A03G0395900	4.25493	6.7933e-27	4.19057e-26	26.1679	25.3777	225
Chr1A	259465750	259465800	CK_peak_407	18.2883	-	1	50	0	TraesCS1A03G0403400	8.60587	2.43078e-06	3.12379e-06	5.61426	5.50532	50
Chr1A	260068999	260069099	CK_peak_408	11.8876	-	1	100	0	TraesCS1A03G0404500	4.56973	0.000252156	0.000263925	3.59833	3.57852	100
Chr1A	269033881	269034056	CK_peak_409	57.9021	-	1	175	0	TraesCS1A03G0412400	3.86795	1.01758e-18	3.71311e-18	17.9924	17.4303	175
Chr1A	269037297	269037347	CK_peak_410	11.5516	-	1	50	0	TraesCS1A03G0412400	6.72379	0.00032047	0.000333142	3.49421	3.47737	50
Chr1A	282385647	282385797	CK_peak_411	26.5771	-	1	150	0	TraesCS1A03G0426600	5.17117	5.93882e-09	9.98852e-09	8.2263	8.0005	150
Chr1A	283434215	283434340	CK_peak_412	56.2091	-	1	125	0	TraesCS1A03G0427700LC,TraesCS1A03G0427800	4.00365	3.42309e-18	1.20052e-17	17.4656	16.9206	125
Chr1A	286688161	286688311	CK_peak_413	78.7667	-	1	150	0	TraesCS1A03G0429500	3.49222	3.54144e-25	1.94467e-24	24.4508	23.7112	150
Chr1A	286689246	286689583	CK_peak_414	16.909	-	2	5,70	0,267	TraesCS1A03G0429500	4.26595	6.6127e-06	8.12612e-06	5.17962	5.09012	337
Chr1A	290304775	290304875	CK_peak_415	18.5295	-	1	100	0	TraesCS1A03G0433600	3.7032	2.04165e-06	2.64277e-06	5.69002	5.57794	100
Chr1A	290304900	290304950	CK_peak_416	23.7602	-	1	50	0	TraesCS1A03G0433600	3.74002	4.55519e-08	7.03841e-08	7.34149	7.15253	50
Chr1A	293856134	293856309	CK_peak_417	93.4246	-	1	175	0	TraesCS1A03G0439700	4.84587	1.03405e-29	7.52303e-29	28.9855	28.1236	175
Chr1A	295907727	295907802	CK_peak_418	12.1017	-	1	75	0	TraesCS1A03G0443600LC	4.54033	0.000216148	0.000227517	3.66525	3.64299	75
Chr1A	296987506	296987606	CK_peak_419	17.9653	-	1	100	0	TraesCS1A03G0444900	4.30883	3.07216e-06	3.90754e-06	5.51256	5.4081	100
Chr1A	297965999	297966124	CK_peak_420	13.2558	-	1	125	0	TraesCS1A03G0445800	4.16643	9.40183e-05	0.000102238	4.02679	3.99039	125
Chr1A	303503515	303503715	CK_peak_421	43.7612	-	1	200	0	TraesCS1A03G0455800	4.16545	2.50377e-14	6.70764e-14	13.6014	13.1734	200
Chr1A	304347514	304347564	CK_peak_422	13.2397	-	1	50	0	TraesCS1A03G0457400	3.96363	9.51381e-05	0.000103382	4.02165	3.98555	50
Chr1A	305566568	305566843	CK_peak_423	48.4366	-	1	275	0	TraesCS1A03G0459800	4.7798	8.78129e-16	2.62509e-15	15.0564	14.5809	275
Chr1A	305749545	305749820	CK_peak_424	114.439	-	1	275	0	TraesCS1A03G0460000	4.83335	3.50673e-36	3.55074e-35	35.4551	34.4497	275
Chr1A	306720882	306721007	CK_peak_425	52.9055	-	1	125	0	TraesCS1A03G0460600	3.78767	3.59438e-17	1.18535e-16	16.4444	15.9262	125
Chr1A	310267038	310267188	CK_peak_426	104.601	-	1	150	0	TraesCS1A03G0465100	3.37452	3.74509e-33	3.25036e-32	32.4265	31.4881	150
Chr1A	310643799	310643999	CK_peak_427	117.1	-	1	200	0	TraesCS1A03G0466200	4.69215	5.29505e-37	5.61503e-36	36.2761	35.2506	200
Chr1A	315567797	315567997	CK_peak_428	41.1051	-	1	200	0	TraesCS1A03G0474000	3.91056	1.68656e-13	4.22791e-13	12.773	12.3739	200
Chr1A	320717649	320717749	CK_peak_429	26.8675	-	1	100	0	TraesCS1A03G0477800	3.86685	4.81392e-09	8.16727e-09	8.3175	8.08792	100
Chr1A	323496711	323496836	CK_peak_430	20.093	-	1	125	0	TraesCS1A03G0482200	3.83117	6.54926e-07	8.94168e-07	6.18381	6.04858	125
Chr1A	323503527	323503702	CK_peak_431	48.3262	-	1	175	0	TraesCS1A03G0482300	4.28904	9.51495e-16	2.83386e-15	15.0216	14.5476	175
Chr1A	326643458	326643633	CK_peak_432	54.6681	-	1	175	0	TraesCS1A03G0486400	4.2557	1.02496e-17	3.49342e-17	16.9893	16.4567	175
Chr1A	328605324	328605449	CK_peak_433	10.1983	-	1	125	0	TraesCS1A03G0487700,TraesCS1A03G0487800LC	3.80184	0.000841882	0.000851147	3.07475	3.07	125
Chr1A	329114206	329114381	CK_peak_434	90.7845	-	1	175	0	TraesCS1A03G0488800,TraesCS1A03G0488900	3.57981	6.79679e-29	4.68979e-28	28.1677	27.3288	175
Chr1A	330826815	330826915	CK_peak_435	18.8928	-	1	100	0	TraesCS1A03G0490400	3.78658	1.56693e-06	2.05452e-06	5.80495	5.68729	100
Chr1A	332339070	332339170	CK_peak_436	20.9136	-	1	100	0	TraesCS1A03G0491900	4.03791	3.60143e-07	5.06253e-07	6.44352	6.29563	100
Chr1A	335171163	335171363	CK_peak_437	62.2738	-	1	200	0	TraesCS1A03G0494500	3.86229	4.4743e-20	1.7936e-19	19.3493	18.7463	200
Chr1A	335753520	335753620	CK_peak_438	36.4512	-	1	100	0	TraesCS1A03G0497100	3.81822	4.7807e-12	1.0644e-11	11.3205	10.9729	100
Chr1A	336001608	336001683	CK_peak_439	31.6996	-	1	75	0	TraesCS1A03G0497600	3.14754	1.46888e-10	2.86724e-10	9.83301	9.54254	75
Chr1A	336562199	336562374	CK_peak_440	67.5185	-	1	175	0	TraesCS1A03G0497900	4.25314	1.06465e-21	4.73045e-21	20.9728	20.3251	175
Chr1A	337379196	337379521	CK_peak_441	202.384	-	1	325	0	TraesCS1A03G0499300,TraesCS1A03G0499400	5.51558	3.12022e-63	1.19249e-61	62.5058	60.9235	325
Chr1A	340129772	340130022	CK_peak_442	31.0514	-	1	250	0	TraesCS1A03G0503700,TraesCS1A03G0503800	4.88752	2.34219e-10	4.49372e-10	9.63038	9.34739	250
Chr1A	341544873	341544973	CK_peak_443	24.4525	-	1	100	0	TraesCS1A03G0505200	3.45362	2.75138e-08	4.35587e-08	7.56045	7.36092	100
Chr1A	344946946	344947271	CK_peak_444	45.7968	-	1	325	0	TraesCS1A03G0508700	4.71426	5.82472e-15	1.63605e-14	14.2347	13.7862	325
Chr1A	344951988	344952038	CK_peak_445	15.7721	-	1	50	0	TraesCS1A03G0508700	6.83168	1.51316e-05	1.78704e-05	4.82011	4.74787	50
Chr1A	345235556	345235731	CK_peak_446	12.6717	-	1	175	0	TraesCS1A03G0510100	5.87339	0.000143286	0.000153266	3.8438	3.81455	175
Chr1A	346656491	346656766	CK_peak_447	81.1084	-	1	275	0	TraesCS1A03G0511700	3.57778	6.6444e-26	3.83644e-25	25.1775	24.4161	275
Chr1A	349185163	349185413	CK_peak_448	49.9251	-	1	250	0	TraesCS1A03G0515500	5.47575	3.04044e-16	9.35507e-16	15.5171	15.029	250
Chr1A	350260643	350260693	CK_peak_449	15.4872	-	1	50	0	TraesCS1A03G0517100	6.66913	1.86282e-05	2.17722e-05	4.72983	4.6621	50
Chr1A	350260718	350260943	CK_peak_450	50.0043	-	1	225	0	TraesCS1A03G0517100	3.79805	2.87047e-16	8.85532e-16	15.542	15.0528	225
Chr1A	351934568	351934618	CK_peak_451	14.8266	-	1	50	0	TraesCS1A03G0518600	5.57809	3.01081e-05	3.44141e-05	4.52132	4.46326	50
Chr1A	351934643	351934743	CK_peak_452	16.1677	-	1	100	0	TraesCS1A03G0518600	4.03045	1.13228e-05	1.35847e-05	4.94604	4.86695	100
Chr1A	353138101	353138251	CK_peak_453	79.7947	-	1	150	0	TraesCS1A03G0521700	4.9512	1.70417e-25	9.53647e-25	24.7685	24.0206	150
Chr1A	353386946	353387776	CK_peak_454	14.371	-	2	84,16	0,814	TraesCS1A03G0521900	4.72474	4.19126e-05	4.71958e-05	4.37766	4.3261	830
Chr1A	353665049	353665224	CK_peak_455	32.1306	-	1	175	0	TraesCS1A03G0524200	3.75411	1.07335e-10	2.12675e-10	9.96926	9.67228	175
Chr1A	354779378	354779528	CK_peak_456	39.919	-	1	150	0	TraesCS1A03G0525200	3.6074	3.94479e-13	9.62004e-13	12.404	12.0168	150
Chr1A	355822862	355822937	CK_peak_457	38.4198	-	1	75	0	TraesCS1A03G0527300	3.69119	1.16101e-12	2.71954e-12	11.9352	11.5655	75
Chr1A	356850127	356850377	CK_peak_458	202.746	-	1	250	0	TraesCS1A03G0529100	5.00719	2.40226e-63	9.27393e-62	62.6194	61.0327	250
Chr1A	356859292	356859392	CK_peak_459	11.1941	-	1	100	0	TraesCS1A03G0529300	3.59198	0.000414236	0.000426803	3.38275	3.36977	100
Chr1A	357243346	357243546	CK_peak_460	38.8665	-	1	200	0	TraesCS1A03G0530200	4.23835	8.42678e-13	1.99534e-12	12.0743	11.7	200
Chr1A	358569248	358569298	CK_peak_461	15.2564	-	1	50	0	TraesCS1A03G0531200	5.30469	2.20366e-05	2.55483e-05	4.65685	4.59264	50
Chr1A	358569348	358569498	CK_peak_462	22.412	-	1	150	0	TraesCS1A03G0531200	4.86496	1.20986e-07	1.79188e-07	6.91726	6.74669	150
Chr1A	359674570	359674670	CK_peak_463	53.525	-	1	100	0	TraesCS1A03G0533000	3.41065	2.30823e-17	7.71551e-17	16.6367	16.1126	100
Chr1A	362975910	362976060	CK_peak_464	10.6321	-	1	150	0	TraesCS1A03G0537300	3.38708	0.000618868	0.000630107	3.2084	3.20059	150
Chr1A	367706324	367706424	CK_peak_465	11.5651	-	1	100	0	TraesCS1A03G0544100	4.78095	0.000317391	0.000330026	3.4984	3.48145	100
Chr1A	373953994	373954094	CK_peak_466	21.0489	-	1	100	0	TraesCS1A03G0554900	7.69708	3.26269e-07	4.6093e-07	6.48642	6.33636	100
Chr1A	374026982	374027407	CK_peak_467	63.0493	-	1	425	0	TraesCS1A03G0555200	4.60875	2.57467e-20	1.0478e-19	19.5893	18.9797	425
Chr1A	375610064	375610189	CK_peak_468	16.7279	-	1	125	0	TraesCS1A03G0557400	3.46374	7.53869e-06	9.21282e-06	5.1227	5.03561	125
Chr1A	376857492	376857667	CK_peak_469	29.832	-	1	175	0	TraesCS1A03G0559700	5.60838	5.65826e-10	1.04636e-09	9.24732	8.98032	175
Chr1A	377519755	377520055	CK_peak_470	79.9439	-	1	300	0	TraesCS1A03G0560100	4.66781	1.5334e-25	8.59976e-25	24.8143	24.0655	300
Chr1A	377893444	377893494	CK_peak_471	13.3042	-	1	50	0	TraesCS1A03G0560900	3.7676	9.07565e-05	9.88603e-05	4.04212	4.00498	50
Chr1A	378058600	378058650	CK_peak_472	29.5886	-	1	50	0	TraesCS1A03G0561300	3.44894	6.7409e-10	1.23861e-09	9.17128	8.90707	50
Chr1A	382771305	382771505	CK_peak_473	44.0226	-	1	200	0	TraesCS1A03G0568600	4.06275	2.07306e-14	5.59605e-14	13.6834	13.2521	200
Chr1A	382801703	382801778	CK_peak_474	22.5813	-	1	75	0	TraesCS1A03G0568800	3.55805	1.07004e-07	1.59347e-07	6.9706	6.79766	75
Chr1A	386976228	386976303	CK_peak_475	16.331	-	1	75	0	TraesCS1A03G0572600	5.93547	1.00599e-05	1.21306e-05	4.99741	4.91612	75
Chr1A	388044188	388044513	CK_peak_476	166.58	-	1	325	0	TraesCS1A03G0573800	4.23981	3.24539e-52	7.15159e-51	51.4887	50.1456	325
Chr1A	388098895	388098945	CK_peak_477	17.6527	-	1	50	0	TraesCS1A03G0574000	8.54106	3.852e-06	4.85287e-06	5.41431	5.314	50
Chr1A	393540085	393540260	CK_peak_478	27.0987	-	1	175	0	TraesCS1A03G0581700	4.09452	4.08001e-09	6.95774e-09	8.38934	8.15753	175
Chr1A	394215982	394216057	CK_peak_479	12.1709	-	1	75	0	TraesCS1A03G0583200,TraesCS1A03G0583300	6.97108	0.000205691	0.00021687	3.68678	3.6638	75
Chr1A	395146341	395146641	CK_peak_480	78.623	-	1	300	0	TraesCS1A03G0584500	4.06356	3.92374e-25	2.14841e-24	24.4063	23.6679	300
Chr1A	395929657	395929757	CK_peak_481	34.1531	-	1	100	0	TraesCS1A03G0585600	4.72164	2.49711e-11	5.23487e-11	10.6026	10.2811	100
Chr1A	396001707	396001857	CK_peak_482	40.5441	-	1	150	0	TraesCS1A03G0585900	4.02916	2.51687e-13	6.23737e-13	12.5991	12.205	150
Chr1A	396265066	396265241	CK_peak_483	75.283	-	1	175	0	TraesCS1A03G0587300	3.68055	4.20851e-24	2.17544e-23	23.3759	22.6625	175
Chr1A	398154368	398154443	CK_peak_484	22.2096	-	1	75	0	TraesCS1A03G0590000	3.52058	1.40174e-07	2.06185e-07	6.85333	6.68574	75
Chr1A	399419913	399420088	CK_peak_485	48.316	-	1	175	0	TraesCS1A03G0591500	4.34148	9.58419e-16	2.85392e-15	15.0184	14.5446	175
Chr1A	400900190	400900565	CK_peak_486	144.733	-	1	375	0	TraesCS1A03G0593200LC,TraesCS1A03G0593300	6.53014	1.65395e-45	2.69743e-44	44.7815	43.569	375
Chr1A	400916573	400916748	CK_peak_487	9.37422	-	1	175	0	TraesCS1A03G0593400	3.70273	0.00150342	0.00150688	2.82292	2.82192	175
Chr1A	401161558	401161783	CK_peak_488	53.5595	-	1	225	0	TraesCS1A03G0593700	3.56485	2.25269e-17	7.53317e-17	16.6473	16.123	225
Chr1A	405301347	405301447	CK_peak_489	24.2326	-	1	100	0	TraesCS1A03G0600400	4.11299	3.22896e-08	5.07299e-08	7.49094	7.29474	100
Chr1A	408749601	408749826	CK_peak_490	99.8859	-	1	225	0	TraesCS1A03G0605200	5.54876	1.05428e-31	8.53779e-31	30.977	30.0687	225
Chr1A	408950197	408950297	CK_peak_491	10.653	-	1	100	0	TraesCS1A03G0605500	4.66725	0.000609647	0.00062105	3.21492	3.20687	100
Chr1A	408950322	408950522	CK_peak_492	61.9457	-	1	200	0	TraesCS1A03G0605500	5.97357	5.66269e-20	2.25164e-19	19.247	18.6475	200
Chr1A	408958544	408958619	CK_peak_493	10.8205	-	1	75	0	TraesCS1A03G0605600	6.37744	0.000540866	0.000552978	3.26691	3.25729	75
Chr1A	408965937	408966062	CK_peak_494	13.6525	-	1	125	0	TraesCS1A03G0605700	3.47122	7.05246e-05	7.76596e-05	4.15166	4.10981	125
Chr1A	418141520	418141570	CK_peak_495	68.7687	-	1	50	0	TraesCS1A03G0612600LC	3.81955	4.37413e-22	1.9887e-21	21.3591	20.7014	50
Chr1A	419844946	419845096	CK_peak_496	21.9664	-	1	150	0	TraesCS1A03G0613700	4.96847	1.66993e-07	2.44037e-07	6.7773	6.61254	150
Chr1A	427534097	427534197	CK_peak_497	27.3321	-	1	100	0	TraesCS1A03G0621900	4.19455	3.44882e-09	5.91842e-09	8.46233	8.22779	100
Chr1A	428737665	428737890	CK_peak_498	133.345	-	1	225	0	TraesCS1A03G0623300,TraesCS1A03G0623400	5.02113	5.33552e-42	7.23212e-41	41.2728	40.1407	225
Chr1A	428909305	428909430	CK_peak_499	14.7784	-	1	125	0	TraesCS1A03G0623900	4.00127	3.11722e-05	3.5585e-05	4.50623	4.44873	125
Chr1A	434837552	434837627	CK_peak_500	15.4804	-	1	75	0	TraesCS1A03G0632600	3.9232	1.872e-05	2.18745e-05	4.72769	4.66006	75
Chr1A	438273661	438273811	CK_peak_501	43.8294	-	1	150	0	TraesCS1A03G0637200,TraesCS1A03G0637300	3.26124	2.38009e-14	6.39789e-14	13.6234	13.194	150
Chr1A	438277117	438277217	CK_peak_502	18.8206	-	1	100	0	TraesCS1A03G0637300	4.29249	1.65287e-06	2.15996e-06	5.78176	5.66555	100
Chr1A	438286884	438286934	CK_peak_503	41.7574	-	1	50	0	TraesCS1A03G0637500	3.91482	1.05372e-13	2.69013e-13	12.9773	12.5702	50
Chr1A	442015567	442015642	CK_peak_504	15.7088	-	1	75	0	TraesCS1A03G0642700	3.66956	1.58451e-05	1.86711e-05	4.8001	4.72883	75
Chr1A	442269023	442269398	CK_peak_505	147.977	-	1	375	0	TraesCS1A03G0643000	5.2445	1.68027e-46	2.84693e-45	45.7746	44.5456	375
Chr1A	442609613	442609788	CK_peak_506	67.1051	-	1	175	0	TraesCS1A03G0643900	6.44197	1.43242e-21	6.30025e-21	20.8439	20.2006	175
Chr1A	443070137	443070212	CK_peak_507	18.4391	-	1	75	0	TraesCS1A03G0645500	3.82763	2.18026e-06	2.8137e-06	5.66149	5.55072	75
Chr1A	443070362	443070412	CK_peak_508	28.8688	-	1	50	0	TraesCS1A03G0645500	3.5189	1.13414e-09	2.03992e-09	8.94533	8.69039	50
Chr1A	444434733	444434883	CK_peak_509	144.91	-	1	150	0	TraesCS1A03G0648400	3.85216	1.46012e-45	2.38643e-44	44.8356	43.6223	150
Chr1A	445017270	445017495	CK_peak_510	43.5345	-	1	225	0	TraesCS1A03G0649100	4.38386	2.94768e-14	7.84865e-14	13.5305	13.1052	225
Chr1A	445523873	445523923	CK_peak_511	18.0205	-	1	50	0	TraesCS1A03G0650100	4.00076	2.95251e-06	3.761e-06	5.52981	5.4247	50
Chr1A	445956875	445957100	CK_peak_512	269.797	-	1	225	0	TraesCS1A03G0650800	5.10113	5.81074e-84	6.06904e-82	83.2358	81.2169	225
Chr1A	447065334	447065534	CK_peak_513	299.951	-	1	200	0	TraesCS1A03G0652400	5.26757	3.33121e-93	5.07977e-91	92.4774	90.2942	200
Chr1A	447084657	447084809	CK_peak_514	13.9149	-	2	2,48	0,104	TraesCS1A03G0652400	4.20663	5.83121e-05	6.47446e-05	4.23424	4.1888	152
Chr1A	448345667	448345967	CK_peak_515	76.8777	-	1	300	0	TraesCS1A03G0655700	3.62598	1.3528e-24	7.20278e-24	23.8688	23.1425	300
Chr1A	454553316	454553391	CK_peak_516	11.1266	-	1	75	0	TraesCS1A03G0664300	3.85041	0.000434808	0.000447274	3.3617	3.34943	75
Chr1A	459698788	459698963	CK_peak_517	37.1265	-	1	175	0	TraesCS1A03G0670100	3.95947	2.93852e-12	6.66509e-12	11.5319	11.1762	175
Chr1A	462058488	462058688	CK_peak_518	53.0066	-	1	200	0	TraesCS1A03G0674000	4.33349	3.34023e-17	1.10512e-16	16.4762	15.9566	200
Chr1A	464321930	464322105	CK_peak_519	10.4122	-	1	175	0	TraesCS1A03G0679900	5.23526	0.000723223	0.000733859	3.14073	3.13439	175
Chr1A	465058649	465058874	CK_peak_520	94.8283	-	1	225	0	TraesCS1A03G0681800	4.03165	3.84122e-30	2.84343e-29	29.4155	28.5462	225
Chr1A	465162964	465163089	CK_peak_521	15.5389	-	1	125	0	TraesCS1A03G0682100	4.75794	1.7936e-05	2.1005e-05	4.74628	4.67768	125
Chr1A	472964905	472965105	CK_peak_522	47.8325	-	1	200	0	TraesCS1A03G0696400	3.61894	1.35384e-15	3.99009e-15	14.8684	14.399	200
Chr1A	473133657	473133832	CK_peak_523	51.1917	-	1	175	0	TraesCS1A03G0698000	4.25582	1.22573e-16	3.88833e-16	15.9116	15.4102	175
Chr1A	475264707	475264932	CK_peak_524	90.0599	-	1	225	0	TraesCS1A03G0701700	5.45671	1.13327e-28	7.74944e-28	27.9457	27.1107	225
Chr1A	475822183	475822333	CK_peak_525	32.7526	-	1	150	0	TraesCS1A03G0702200	4.7267	6.84237e-11	1.38194e-10	10.1648	9.85951	150
Chr1A	475830704	475830804	CK_peak_526	11.5807	-	1	100	0	TraesCS1A03G0702300	3.69866	0.0003138	0.000326474	3.50335	3.48615	100
Chr1A	480239869	480240044	CK_peak_527	37.0514	-	1	175	0	TraesCS1A03G0709000	5.20773	3.10191e-12	7.02108e-12	11.5084	11.1536	175
Chr1A	482357682	482357782	CK_peak_528	14.9997	-	1	100	0	TraesCS1A03G0714200LC	7.98398	2.65599e-05	3.05232e-05	4.57577	4.51537	100
Chr1A	482433374	482433524	CK_peak_529	67.0542	-	1	150	0	TraesCS1A03G0714500,TraesCS1A03G0714700LC	4.30598	1.48513e-21	6.52645e-21	20.8282	20.1853	150
Chr1A	483290431	483290581	CK_peak_530	67.3674	-	1	150	0	TraesCS1A03G0717000	4.74686	1.18639e-21	5.25296e-21	20.9258	20.2796	150
Chr1A	484356180	484356280	CK_peak_531	67.3362	-	1	100	0	TraesCS1A03G0719000	3.61063	1.21263e-21	5.36759e-21	20.9163	20.2702	100
Chr1A	484610532	484610607	CK_peak_532	61.535	-	1	75	0	TraesCS1A03G0720300	3.65441	7.60397e-20	2.99311e-19	19.119	18.5239	75
Chr1A	484617116	484617191	CK_peak_533	16.6039	-	1	75	0	TraesCS1A03G0720400	3.62414	8.251e-06	1.00399e-05	5.08349	4.99827	75
Chr1A	485910893	485910968	CK_peak_534	39.3665	-	1	75	0	TraesCS1A03G0722700	3.73797	5.87567e-13	1.41087e-12	12.2309	11.8505	75
Chr1A	487137220	487137370	CK_peak_535	29.2241	-	1	150	0	TraesCS1A03G0725200	3.7098	8.77929e-10	1.5947e-09	9.05654	8.79732	150
Chr1A	488320439	488320534	CK_peak_536	19.4852	-	1	95	0	TraesCS1A03G0727200	3.43617	1.01932e-06	1.36263e-06	5.99169	5.86562	95
Chr1A	492062333	492062383	CK_peak_537	9.70386	-	1	50	0	TraesCS1A03G0737400	4.1704	0.00119396	0.00119907	2.92301	2.92115	50
Chr1A	492062458	492062508	CK_peak_538	11.5386	-	1	50	0	TraesCS1A03G0737400	6.74251	0.000323456	0.000336153	3.49019	3.47346	50
Chr1A	492682837	492682987	CK_peak_539	49.2137	-	1	150	0	TraesCS1A03G0738800	5.97936	5.04276e-16	1.53181e-15	15.2973	14.8148	150
Chr1A	493740262	493740412	CK_peak_540	18.2471	-	1	150	0	TraesCS1A03G0741100	5.0713	2.5047e-06	3.21419e-06	5.60124	5.49293	150
Chr1A	497954829	497954904	CK_peak_541	16.9715	-	1	75	0	TraesCS1A03G0753400	3.53389	6.3184e-06	7.7814e-06	5.19939	5.10894	75
Chr1A	499019646	499019946	CK_peak_542	314.195	-	1	300	0	TraesCS1A03G0756500	5.26014	1.40741e-97	2.61728e-95	96.8516	94.5822	300
Chr1A	500100318	500100462	CK_peak_543	35.5556	-	1	144	0	TraesCS1A03G0761900	4.58256	9.11726e-12	1.98019e-11	11.0401	10.7033	144
Chr1A	501126865	501126990	CK_peak_544	17.7374	-	1	125	0	TraesCS1A03G0765200	3.5996	3.62171e-06	4.57635e-06	5.44109	5.33948	125
Chr1A	501472380	501472480	CK_peak_545	65.3216	-	1	100	0	TraesCS1A03G0766800	3.47301	5.08771e-21	2.16893e-20	20.2935	19.6638	100
Chr1A	504860043	504860268	CK_peak_546	73.315	-	1	225	0	TraesCS1A03G0774200	4.75311	1.71069e-23	8.51103e-23	22.7668	22.07	225
Chr1A	506790201	506790426	CK_peak_547	73.5395	-	1	225	0	TraesCS1A03G0778700	3.8571	1.45988e-23	7.28458e-23	22.8357	22.1376	225
Chr1A	508581824	508581999	CK_peak_548	18.333	-	1	175	0	TraesCS1A03G0782800	3.47231	2.35313e-06	3.02835e-06	5.62835	5.51879	175
Chr1A	510024572	510024797	CK_peak_549	122.716	-	1	225	0	TraesCS1A03G0786600,TraesCS1A03G0786700LC	6.39671	9.91127e-39	1.14498e-37	38.0039	36.9412	225
Chr1A	510140218	510140268	CK_peak_550	37.617	-	1	50	0	TraesCS1A03G0787500	5.31713	2.06198e-12	4.74398e-12	11.6857	11.3239	50
Chr1A	514328040	514328315	CK_peak_551	127.901	-	1	275	0	TraesCS1A03G0797000	4.85777	2.52879e-40	3.14788e-39	39.5971	38.502	275
Chr1A	514336546	514336696	CK_peak_552	49.3915	-	1	150	0	TraesCS1A03G0797200	4.37675	4.44277e-16	1.35414e-15	15.3523	14.8683	150
Chr1A	515221899	515222199	CK_peak_553	126.782	-	1	300	0	TraesCS1A03G0801100	4.74227	5.57549e-40	6.83446e-39	39.2537	38.1653	300
Chr1A	518252278	518252378	CK_peak_554	27.1456	-	1	100	0	TraesCS1A03G0809200	6.23349	3.94352e-09	6.73551e-09	8.40412	8.17163	100
Chr1A	518779722	518779897	CK_peak_555	18.4189	-	1	175	0	TraesCS1A03G0811400	6.43559	2.21218e-06	2.85345e-06	5.65518	5.54463	175
Chr1A	518785815	518786040	CK_peak_556	97.0641	-	1	225	0	TraesCS1A03G0811600	4.49805	7.87398e-31	6.03672e-30	30.1038	29.2192	225
Chr1A	522071824	522072199	CK_peak_557	76.7587	-	1	375	0	TraesCS1A03G0822500	4.92381	1.47326e-24	7.82235e-24	23.8317	23.1067	375
Chr1A	522308971	522309046	CK_peak_558	22.1305	-	1	75	0	TraesCS1A03G0823600	4.19478	1.48358e-07	2.17802e-07	6.82869	6.66194	75
Chr1A	524658362	524658537	CK_peak_559	27.2163	-	1	175	0	TraesCS1A03G0830600	4.17302	3.74737e-09	6.41342e-09	8.42627	8.19291	175
Chr1A	529640454	529640629	CK_peak_560	24.1315	-	1	175	0	TraesCS1A03G0836000	3.58678	3.47511e-08	5.44121e-08	7.45903	7.2643	175
Chr1A	530913991	530914041	CK_peak_561	21.6157	-	1	50	0	TraesCS1A03G0837600	4.62387	2.15905e-07	3.11185e-07	6.66574	6.50698	50
Chr1A	531874553	531874753	CK_peak_562	31.9204	-	1	200	0	TraesCS1A03G0839100	4.62644	1.25094e-10	2.46042e-10	9.90276	9.60899	200
Chr1A	532255746	532255921	CK_peak_563	75.4351	-	1	175	0	TraesCS1A03G0840000	3.72589	3.77592e-24	1.95781e-23	23.423	22.7082	175
Chr1A	532393013	532393288	CK_peak_564	36.675	-	1	275	0	TraesCS1A03G0841000	4.49233	4.0716e-12	9.11448e-12	11.3902	11.0403	275
Chr1A	532711420	532711595	CK_peak_565	9.35113	-	1	175	0	TraesCS1A03G0843400	3.62456	0.00152798	0.00153119	2.81588	2.81497	175
Chr1A	534849658	534849733	CK_peak_566	16.0901	-	1	75	0	TraesCS1A03G0851800	4.03348	1.19888e-05	1.43355e-05	4.92123	4.84359	75
Chr1A	535146192	535146542	CK_peak_567	137.359	-	1	350	0	TraesCS1A03G0853300	5.03989	3.13194e-43	4.47601e-42	42.5042	41.3491	350
Chr1A	535984704	535984779	CK_peak_568	31.7434	-	1	75	0	TraesCS1A03G0855800	3.54315	1.42219e-10	2.78145e-10	9.84704	9.55573	75
Chr1A	535991128	535991353	CK_peak_569	52.5606	-	1	225	0	TraesCS1A03G0855900	5.22756	4.59967e-17	1.50548e-16	16.3373	15.8223	225
Chr1A	537020647	537020872	CK_peak_570	102.474	-	1	225	0	TraesCS1A03G0859900	4.12109	1.6856e-32	1.42009e-31	31.7732	30.8477	225
Chr1A	538644764	538645089	CK_peak_571	65.3107	-	1	325	0	TraesCS1A03G0866200	4.50074	5.12758e-21	2.18531e-20	20.2901	19.6605	325
Chr1A	539225833	539226058	CK_peak_572	106.219	-	1	225	0	TraesCS1A03G0868900	3.56704	1.18185e-33	1.05888e-32	32.9274	31.9752	225
Chr1A	539509365	539509490	CK_peak_573	19.6417	-	1	125	0	TraesCS1A03G0869500	3.7514	9.10104e-07	1.22253e-06	6.04091	5.91274	125
Chr1A	541897899	541898149	CK_peak_574	217.9	-	1	250	0	TraesCS1A03G0874600	4.81277	5.18948e-68	2.54451e-66	67.2849	65.5944	250
Chr1A	542155837	542156037	CK_peak_575	32.5694	-	1	200	0	TraesCS1A03G0876000	4.24663	7.824e-11	1.56902e-10	10.1066	9.80437	200
Chr1A	543378476	543378626	CK_peak_576	14.1778	-	1	150	0	TraesCS1A03G0879800,TraesCS1A03G0879900LC	3.90439	4.81775e-05	5.39595e-05	4.31716	4.26793	150
Chr1A	543379563	543379813	CK_peak_577	88.6955	-	1	250	0	TraesCS1A03G0880000	4.77029	2.99117e-28	1.99529e-27	27.5242	26.7	250
Chr1A	545667185	545667310	CK_peak_578	27.8983	-	1	125	0	TraesCS1A03G0885500	4.12967	2.28895e-09	3.99728e-09	8.64036	8.39824	125
Chr1A	545686201	545686326	CK_peak_579	24.1991	-	1	125	0	TraesCS1A03G0885600	4.47859	3.30946e-08	5.19197e-08	7.48024	7.28467	125
Chr1A	546101380	546101555	CK_peak_580	85.2472	-	1	175	0	TraesCS1A03G0887700	3.79071	3.47636e-27	2.17794e-26	26.4589	25.662	175
Chr1A	548224148	548224198	CK_peak_581	48.9149	-	1	50	0	TraesCS1A03G0895300	4.3215	6.23407e-16	1.88431e-15	15.2052	14.7248	50
Chr1A	549072618	549072768	CK_peak_582	74.0865	-	1	150	0	TraesCS1A03G0896900	3.82329	9.86179e-24	4.98601e-23	23.006	22.3022	150
Chr1A	549085462	549085612	CK_peak_583	217.437	-	1	150	0	TraesCS1A03G0897000	4.29472	7.24325e-68	3.50642e-66	67.1401	65.4551	150
Chr1A	549094480	549094605	CK_peak_584	31.8276	-	1	125	0	TraesCS1A03G0897000	4.63189	1.33796e-10	2.62378e-10	9.87356	9.58107	125
Chr1A	551289065	551289290	CK_peak_585	70.0208	-	1	225	0	TraesCS1A03G0906100	4.76524	1.7843e-22	8.34884e-22	21.7485	21.0784	225
Chr1A	552238649	552238749	CK_peak_586	88.9607	-	1	100	0	TraesCS1A03G0910800	3.57551	2.47786e-28	1.66014e-27	27.6059	26.7799	100
Chr1A	552240856	552240906	CK_peak_587	18.6103	-	1	50	0	TraesCS1A03G0910800	4.69117	1.92569e-06	2.49892e-06	5.71541	5.60225	50
Chr1A	552336589	552336864	CK_peak_588	83.6353	-	1	275	0	TraesCS1A03G0911100	4.51022	1.09089e-26	6.65668e-26	25.9622	25.1767	275
Chr1A	552939345	552939547	CK_peak_589	31.3852	-	2	6,94	0,108	TraesCS1A03G0914100	3.43349	1.84173e-10	3.56538e-10	9.73477	9.44789	202
Chr1A	553370961	553371111	CK_peak_590	35.7291	-	1	150	0	TraesCS1A03G0916800	3.94085	8.04369e-12	1.75577e-11	11.0945	10.7555	150
Chr1A	553894812	553894987	CK_peak_591	81.011	-	1	175	0	TraesCS1A03G0920500	4.18742	7.12222e-26	4.10456e-25	25.1474	24.3867	175
Chr1A	553896965	553897015	CK_peak_592	15.0421	-	1	50	0	TraesCS1A03G0920500	4.05079	2.577e-05	2.964e-05	4.58889	4.52812	50
Chr1A	556531456	556531531	CK_peak_593	31.6529	-	1	75	0	TraesCS1A03G0936500	3.70159	1.51972e-10	2.96156e-10	9.81824	9.52848	75
Chr1A	558288266	558288491	CK_peak_594	135.735	-	1	225	0	TraesCS1A03G0945000,TraesCS1A03G0945100	5.19413	9.86867e-43	1.37935e-41	42.0057	40.8603	225
Chr1A	558922847	558923047	CK_peak_595	30.5798	-	1	200	0	TraesCS1A03G0947000	4.01695	3.29557e-10	6.23114e-10	9.48207	9.20543	200
Chr1A	559470470	559470545	CK_peak_596	14.0065	-	1	75	0	TraesCS1A03G0949800,TraesCS1A03G0949900LC	4.46623	5.4561e-05	6.0761e-05	4.26312	4.21638	75
Chr1A	559473525	559473625	CK_peak_597	16.5661	-	1	100	0	TraesCS1A03G0950000	5.07963	8.47747e-06	1.03064e-05	5.07173	4.98689	100
Chr1A	562593329	562593504	CK_peak_598	18.3079	-	1	175	0	TraesCS1A03G0958900	5.30748	2.39694e-06	3.08161e-06	5.62034	5.51122	175
Chr1A	564937009	564937209	CK_peak_599	32.3683	-	1	200	0	TraesCS1A03G0967800	5.10188	9.04071e-11	1.80377e-10	10.0438	9.74382	200
Chr1A	565125995	565126145	CK_peak_600	29.0069	-	1	150	0	TraesCS1A03G0968800LC	5.78826	1.02664e-09	1.85378e-09	8.98858	8.73194	150
Chr1A	565378487	565378587	CK_peak_601	16.9871	-	1	100	0	TraesCS1A03G0969900	3.70289	6.24651e-06	7.69784e-06	5.20436	5.11363	100
Chr1A	566588312	566588487	CK_peak_602	20.4927	-	1	175	0	TraesCS1A03G0977000	4.04783	4.89277e-07	6.77779e-07	6.31045	6.16891	175
Chr1A	568079670	568079770	CK_peak_603	23.3285	-	1	100	0	TraesCS1A03G0982700	3.47116	6.23239e-08	9.49332e-08	7.20535	7.02258	100
Chr1A	569661048	569661373	CK_peak_604	164.35	-	1	325	0	TraesCS1A03G0986300	4.67572	1.57526e-51	3.3549e-50	50.8026	49.4743	325
Chr1A	569663113	569664393	CK_peak_605	13.4012	-	2	5170	0,1110	TraesCS1A03G0986300	3.71834	8.46521e-05	9.24354e-05	4.07236	4.03416	1280
Chr1A	569745426	569745526	CK_peak_606	48.863	-	1	100	0	TraesCS1A03G0986900,TraesCS1A03G0987000LC	3.56863	6.47253e-16	1.95329e-15	15.1889	14.7092	100
Chr1A	572974030	572974180	CK_peak_607	56.7612	-	1	150	0	TraesCS1A03G0995700	3.41373	2.30671e-18	8.18785e-18	17.637	17.0868	150
Chr1A	576120552	576120802	CK_peak_608	162.23	-	1	250	0	TraesCS1A03G1006500	3.79717	7.03832e-51	1.45825e-49	50.1525	48.8362	250
Chr1A	576123891	576123966	CK_peak_609	19.9419	-	1	75	0	TraesCS1A03G1006500	3.51682	7.31146e-07	9.92897e-07	6.136	6.0031	75
Chr1A	576826417	576826692	CK_peak_610	314.612	-	1	275	0	TraesCS1A03G1008400	5.58834	1.04162e-97	1.96095e-95	96.9823	94.7075	275
Chr1A	576836494	576836696	CK_peak_611	33.6415	-	2	37,76	0,126	TraesCS1A03G1008600	3.32804	3.61176e-11	7.46283e-11	10.4423	10.1271	202
Chr1A	577269274	577269449	CK_peak_612	53.6442	-	1	175	0	TraesCS1A03G1011400	3.61218	2.1201e-17	7.10379e-17	16.6736	16.1485	175
Chr1A	578404940	578405822	CK_peak_613	27.2878	-	2	32,68	0,814	TraesCS1A03G1015700	3.62314	3.56136e-09	6.1033e-09	8.44838	8.21444	882
Chr1A	581060597	581060797	CK_peak_614	40.265	-	1	200	0	TraesCS1A03G1026800	4.17543	3.07592e-13	7.56893e-13	12.512	12.121	200
Chr1A	581762777	581762977	CK_peak_615	48.649	-	1	200	0	TraesCS1A03G1029800	4.27672	7.54019e-16	2.26562e-15	15.1226	14.6448	200
Chr1A	583420337	583420387	CK_peak_616	34.8899	-	1	50	0	TraesCS1A03G1033000	4.65455	1.46833e-11	3.1412e-11	10.8332	10.5029	50
Chr1A	583420437	583420487	CK_peak_617	28.7121	-	1	50	0	TraesCS1A03G1033000	3.46869	1.27056e-09	2.27403e-09	8.89601	8.6432	50
Chr1A	584162074	584162149	CK_peak_618	67.5139	-	1	75	0	TraesCS1A03G1034200LC,TraesCS1A03G1034300LC	5.15536	1.06834e-21	4.74546e-21	20.9713	20.3237	75
Chr1A	585930291	585930466	CK_peak_619	98.981	-	1	175	0	TraesCS1A03G1039300	5.03329	2.00765e-31	1.59868e-30	30.6973	29.7962	175
Chr1A	586773765	586773940	CK_peak_620	48.1539	-	1	175	0	TraesCS1A03G1043200	3.78467	1.07551e-15	3.19324e-15	14.9684	14.4958	175
Chr1A	587063726	587064051	CK_peak_621	134.703	-	1	325	0	TraesCS1A03G1044100	4.07921	2.0397e-42	2.81989e-41	41.6904	40.5498	325
Chr1A	588003346	588003496	CK_peak_622	19.3736	-	1	150	0	TraesCS1A03G1048500	3.89704	1.10536e-06	1.47224e-06	5.9565	5.83202	150
Chr1A	588807482	588807632	CK_peak_623	17.8722	-	1	150	0	TraesCS1A03G1052000	3.76843	3.28486e-06	4.16798e-06	5.48348	5.38007	150
Chr1A	591265701	591265876	CK_peak_624	24.0981	-	1	175	0	TraesCS1A03G1061900	3.74442	3.56093e-08	5.56872e-08	7.44844	7.25424	175
Chr1A	591307245	591307470	CK_peak_625	100.216	-	1	225	0	TraesCS1A03G1062100	3.77139	8.34734e-32	6.79234e-31	31.0785	30.168	225
Chr1A	592861788	592861963	CK_peak_626	61.834	-	1	175	0	TraesCS1A03G1065900	3.98049	6.13097e-20	2.43277e-19	19.2125	18.6139	175
Chr1A	593055461	593055536	CK_peak_627	15.6214	-	1	75	0	TraesCS1A03G1067100	3.45705	1.68887e-05	1.98379e-05	4.7724	4.7025	75
Chr1A	593327623	593327911	CK_peak_628	71.5206	-	2	195,5	0,283	TraesCS1A03G1067600LC	3.67487	6.1063e-23	2.95228e-22	22.2142	21.5298	288
Chr1A	594180976	594181076	CK_peak_629	11.8212	-	1	100	0	TraesCS1A03G1072700	5.01191	0.000264552	0.00027635	3.57749	3.55854	100
Chr1A	594859567	594859642	CK_peak_630	11.9761	-	1	75	0	TraesCS1A03G1076000LC	6.92221	0.000236707	0.000248215	3.62579	3.60517	75
Chr1A	594903750	594903875	CK_peak_631	37.5979	-	1	125	0	TraesCS1A03G1076200	3.1855	2.09076e-12	4.80729e-12	11.6797	11.3181	125
Chr1A	595644823	595645098	CK_peak_632	106.936	-	1	275	0	TraesCS1A03G1079400	5.02928	7.10851e-34	6.44457e-33	33.1482	32.1908	275
Chr1A	598113002	598113202	CK_peak_633	28.8404	-	1	200	0	TraesCS1A03G1086000	4.81662	1.15764e-09	2.08047e-09	8.93643	8.68184	200
Chr1A	598113377	598113427	CK_peak_634	16.21	-	1	50	0	TraesCS1A03G1086000	4.08099	1.0984e-05	1.31916e-05	4.95924	4.8797	50
Chr1B	1191885	1191935	CK_peak_635	42.0038	+	1	50	0	TraesCS1B03G0001600	3.6802	8.83204e-14	2.26772e-13	13.0539	12.6444	50
Chr1B	5615246	5615371	CK_peak_636	67.5283	+	1	125	0	TraesCS1B03G0020700	3.45533	1.05716e-21	4.69854e-21	20.9759	20.328	125
Chr1B	6926153	6926328	CK_peak_637	42.112	+	1	175	0	TraesCS1B03G0027900	4.28765	8.16905e-14	2.10387e-13	13.0878	12.677	175
Chr1B	6930663	6930788	CK_peak_638	22.2592	+	1	125	0	TraesCS1B03G0028000	3.82	1.35221e-07	1.99206e-07	6.86896	6.7007	125
Chr1B	9202455	9202505	CK_peak_639	29.4532	+	1	50	0	TraesCS1B03G0036800	5.09533	7.44091e-10	1.36051e-09	9.12837	8.8663	50
Chr1B	16011035	16011160	CK_peak_640	32.9544	+	1	125	0	TraesCS1B03G0062200LC	10.8017	5.92044e-11	1.2015e-10	10.2276	9.92028	125
Chr1B	18206464	18206539	CK_peak_641	28.5885	+	1	75	0	TraesCS1B03G0073000	3.86928	1.3883e-09	2.47749e-09	8.85752	8.60599	75
Chr1B	18206564	18206789	CK_peak_642	41.2112	+	1	225	0	TraesCS1B03G0073000	4.52441	1.5613e-13	3.9281e-13	12.8065	12.4058	225
Chr1B	18509376	18509501	CK_peak_643	36.609	+	1	125	0	TraesCS1B03G0074200LC	4.86042	4.2716e-12	9.54117e-12	11.3694	11.0204	125
Chr1B	21384282	21384442	CK_peak_644	48.4449	+	1	160	0	TraesCS1B03G0084600	4.02715	8.72535e-16	2.6099e-15	15.0592	14.5834	160
Chr1B	25519539	25519662	CK_peak_645	34.8421	+	1	123	0	TraesCS1B03G0093700	4.80976	1.52008e-11	3.24691e-11	10.8181	10.4885	123
Chr1B	27651129	27652673	CK_peak_646	418.828	+	2	252,73	0,1471	TraesCS1B03G0099700,TraesCS1B03G0099800LC	6.55084	1.03713e-129	8.32382e-127	128.984	126.08	1544
Chr1B	34091471	34091521	CK_peak_647	27.3079	+	1	50	0	TraesCS1B03G0116100	3.35033	3.51017e-09	6.01886e-09	8.45467	8.22049	50
Chr1B	34945075	34945125	CK_peak_648	28.4074	+	1	50	0	TraesCS1B03G0117900	3.36769	1.58284e-09	2.80888e-09	8.80056	8.55147	50
Chr1B	34945175	34945362	CK_peak_649	44.7458	+	1	187	0	TraesCS1B03G0117900	4.0822	1.23462e-14	3.38976e-14	13.9085	13.4698	187
Chr1B	36184557	36184682	CK_peak_650	34.6771	+	1	125	0	TraesCS1B03G0121100	3.60959	1.70955e-11	3.64041e-11	10.7671	10.4388	125
Chr1B	43284094	43284419	CK_peak_651	148.054	+	1	325	0	TraesCS1B03G0131000	4.99874	1.5921e-46	2.70054e-45	45.798	44.5685	325
Chr1B	44221648	44221723	CK_peak_652	12.7609	+	1	75	0	TraesCS1B03G0134900	7.20419	0.000134401	0.000144075	3.8716	3.84141	75
Chr1B	44553793	44553918	CK_peak_653	28.9909	+	1	125	0	TraesCS1B03G0136000	4.16181	1.03833e-09	1.87445e-09	8.98366	8.72713	125
Chr1B	47887552	47887927	CK_peak_654	226.286	+	1	375	0	TraesCS1B03G0143700	5.09084	1.35648e-70	7.60476e-69	69.8676	68.1189	375
Chr1B	48016940	48017084	CK_peak_655	85.4979	+	1	144	0	TraesCS1B03G0143900	3.94647	2.90987e-27	1.83055e-26	26.5361	25.7374	144
Chr1B	52451189	52451314	CK_peak_656	13.7057	+	1	125	0	TraesCS1B03G0152600	4.89638	6.78525e-05	7.48468e-05	4.16843	4.12583	125
Chr1B	55419971	55420131	CK_peak_657	31.5241	+	1	160	0	TraesCS1B03G0163900LC	5.12076	1.66652e-10	3.23812e-10	9.77819	9.48971	160
Chr1B	58748480	58748530	CK_peak_658	10.7262	+	1	50	0	TraesCS1B03G0173600	6.33024	0.000578411	0.000590335	3.23776	3.2289	50
Chr1B	60386136	60386331	CK_peak_659	46.0991	+	2	110,65	0,130	TraesCS1B03G0176700	4.14787	4.68093e-15	1.32676e-14	14.3297	13.8772	195
Chr1B	62378351	62378501	CK_peak_660	68.8947	+	1	150	0	TraesCS1B03G0183800	5.43084	3.9962e-22	1.82231e-21	21.3984	20.7394	150
Chr1B	63114264	63114314	CK_peak_661	18.416	+	1	50	0	TraesCS1B03G0187700	5.86996	2.21699e-06	2.85918e-06	5.65424	5.54376	50
Chr1B	63890328	63890453	CK_peak_662	15.5272	+	1	125	0	TraesCS1B03G0190500	4.05424	1.80906e-05	2.11763e-05	4.74255	4.67415	125
Chr1B	67699471	67699521	CK_peak_663	14.1182	+	1	50	0	TraesCS1B03G0199400	3.91022	5.03224e-05	5.62338e-05	4.29824	4.25	50
Chr1B	68513857	68514032	CK_peak_664	26.4809	+	1	175	0	TraesCS1B03G0202500	4.6108	6.3696e-09	1.06772e-08	8.19589	7.97154	175
Chr1B	68840294	68840369	CK_peak_665	54.4265	+	1	75	0	TraesCS1B03G0202700	3.34488	1.21723e-17	4.13028e-17	16.9146	16.384	75
Chr1B	68976608	68976783	CK_peak_666	32.5588	+	1	175	0	TraesCS1B03G0203300	4.81757	7.88377e-11	1.58059e-10	10.1033	9.80118	175
Chr1B	73851645	73851818	CK_peak_667	56.2905	+	1	173	0	TraesCS1B03G0213800	4.35127	3.22865e-18	1.13468e-17	17.491	16.9451	173
Chr1B	75657577	75657652	CK_peak_668	14.8405	+	1	75	0	TraesCS1B03G0217600	4.02399	2.98001e-05	3.40851e-05	4.52578	4.46744	75
Chr1B	76081897	76082072	CK_peak_669	25.1769	+	1	175	0	TraesCS1B03G0218600	5.23519	1.63213e-08	2.63626e-08	7.78725	7.57901	175
Chr1B	96905787	96905937	CK_peak_670	64.8611	+	1	150	0	TraesCS1B03G0239000	3.921	7.06721e-21	2.98443e-20	20.1508	19.5251	150
Chr1B	100170880	100171050	CK_peak_671	40.6629	+	1	170	0	TraesCS1B03G0244600	4.7242	2.31191e-13	5.74454e-13	12.636	12.2407	170
Chr1B	100262862	100262962	CK_peak_672	18.9026	+	1	100	0	TraesCS1B03G0245000	3.66429	1.55575e-06	2.04057e-06	5.80806	5.69025	100
Chr1B	105210337	105210512	CK_peak_673	26.4858	+	1	175	0	TraesCS1B03G0256400	5.7867	6.34384e-09	1.0641e-08	8.19765	7.97302	175
Chr1B	106436939	106437164	CK_peak_674	106.092	+	1	225	0	TraesCS1B03G0257900LC	3.84852	1.29705e-33	1.15665e-32	32.887	31.9368	225
Chr1B	113017962	113018062	CK_peak_675	13.1871	+	1	100	0	TraesCS1B03G0266000	4.433	9.88681e-05	0.000107221	4.00494	3.96972	100
Chr1B	122167096	122167146	CK_peak_676	26.0385	+	1	50	0	TraesCS1B03G0281600	3.43948	8.76307e-09	1.4509e-08	8.05734	7.83836	50
Chr1B	123181489	123181614	CK_peak_677	22.8088	+	1	125	0	TraesCS1B03G0282900	3.32661	9.07907e-08	1.36106e-07	7.04196	6.86612	125
Chr1B	123383226	123383326	CK_peak_678	10.7151	+	1	100	0	TraesCS1B03G0283100	5.36709	0.000583128	0.00059487	3.23424	3.22558	100
Chr1B	123392359	123392609	CK_peak_679	60.4269	+	1	250	0	TraesCS1B03G0283100	4.50292	1.67892e-19	6.45208e-19	18.775	18.1903	250
Chr1B	126095736	126095885	CK_peak_680	49.1426	+	1	149	0	TraesCS1B03G0290400	4.21266	5.30368e-16	1.60915e-15	15.2754	14.7934	149
Chr1B	130123056	130123231	CK_peak_681	54.6306	+	1	175	0	TraesCS1B03G0298000	3.90126	1.05341e-17	3.58559e-17	16.9774	16.4454	175
Chr1B	138163492	138163665	CK_peak_682	88.13	+	1	173	0	TraesCS1B03G0306100	6.40561	4.45552e-28	2.95273e-27	27.3511	26.5298	173
Chr1B	139203290	139203390	CK_peak_683	17.5844	+	1	100	0	TraesCS1B03G0307100LC,TraesCS1B03G0307200	4.54029	4.04896e-06	5.08839e-06	5.39266	5.29342	100
Chr1B	144929704	144929879	CK_peak_684	50.3823	+	1	175	0	TraesCS1B03G0322100	7.92035	2.18427e-16	6.81422e-16	15.6607	15.1666	175
Chr1B	146014404	146014554	CK_peak_685	45.3678	+	1	150	0	TraesCS1B03G0323800	3.51147	7.90233e-15	2.20257e-14	14.1022	13.6571	150
Chr1B	155217879	155218029	CK_peak_686	40.4785	+	1	150	0	TraesCS1B03G0335700	3.56837	2.63913e-13	6.52784e-13	12.5785	12.1852	150
Chr1B	155218054	155218129	CK_peak_687	20.0219	+	1	75	0	TraesCS1B03G0335700	3.60504	6.89543e-07	9.39329e-07	6.16144	6.02718	75
Chr1B	156978251	156978351	CK_peak_688	24.7389	+	1	100	0	TraesCS1B03G0337900	5.64965	2.24007e-08	3.5716e-08	7.64974	7.44714	100
Chr1B	161973251	161973447	CK_peak_689	85.8252	+	1	196	0	TraesCS1B03G0344500	6.66328	2.31152e-27	1.45896e-26	26.6361	25.836	196
Chr1B	163226775	163226850	CK_peak_690	15.539	+	1	75	0	TraesCS1B03G0346000	5.37213	1.79334e-05	2.10036e-05	4.74634	4.67771	75
Chr1B	164435150	164435400	CK_peak_691	97.8145	+	1	250	0	TraesCS1B03G0347500	3.87594	4.61449e-31	3.58829e-30	30.3359	29.4451	250
Chr1B	165923407	165923732	CK_peak_692	151.439	+	1	325	0	TraesCS1B03G0349500	4.48604	1.44375e-47	2.58401e-46	46.8405	45.5877	325
Chr1B	167734032	167734182	CK_peak_693	17.3123	+	1	150	0	TraesCS1B03G0352100	4.5631	4.93749e-06	6.14426e-06	5.30649	5.21153	150
Chr1B	168518562	168518636	CK_peak_694	14.842	+	1	74	0	TraesCS1B03G0354200	4.24418	2.97674e-05	3.40502e-05	4.52626	4.46788	74
Chr1B	169297446	169297621	CK_peak_695	51.8002	+	1	175	0	TraesCS1B03G0355400	4.10054	7.92737e-17	2.55031e-16	16.1009	15.5934	175
Chr1B	173135363	173135513	CK_peak_696	50.2603	+	1	150	0	TraesCS1B03G0359800	3.64991	2.38681e-16	7.41573e-16	15.6222	15.1298	150
Chr1B	174258290	174258382	CK_peak_697	27.7974	+	1	92	0	TraesCS1B03G0360800	3.60478	2.46157e-09	4.28694e-09	8.60879	8.36785	92
Chr1B	175161565	175161640	CK_peak_698	15.9412	+	1	75	0	TraesCS1B03G0362200	4.43903	1.33692e-05	1.58939e-05	4.87389	4.79877	75
Chr1B	178139826	178139876	CK_peak_699	23.4307	+	1	50	0	TraesCS1B03G0366300	4.36862	5.78252e-08	8.8443e-08	7.23788	7.05334	50
Chr1B	184989265	184989440	CK_peak_700	47.9339	+	1	175	0	TraesCS1B03G0374900	4.9443	1.25803e-15	3.71922e-15	14.9003	14.4295	175
Chr1B	189935374	189935474	CK_peak_701	19.9497	+	1	100	0	TraesCS1B03G0380000	4.70573	7.27071e-07	9.8754e-07	6.13842	6.00545	100
Chr1B	190329322	190329491	CK_peak_702	43.8018	+	1	169	0	TraesCS1B03G0380400	3.76706	2.43036e-14	6.5213e-14	13.6143	13.1857	169
Chr1B	191998744	191998816	CK_peak_703	38.4954	+	1	72	0	TraesCS1B03G0383100	3.29757	1.09986e-12	2.58067e-12	11.9587	11.5883	72
Chr1B	192907747	192907872	CK_peak_704	32.0685	+	1	125	0	TraesCS1B03G0383500	3.5347	1.12366e-10	2.22039e-10	9.94936	9.65357	125
Chr1B	193244940	193245140	CK_peak_705	85.946	+	1	200	0	TraesCS1B03G0384100	3.45682	2.1197e-27	1.34178e-26	26.6737	25.8723	200
Chr1B	193650502	193650577	CK_peak_706	23.0305	+	1	75	0	TraesCS1B03G0384600	3.84858	7.73145e-08	1.16718e-07	7.11174	6.93286	75
Chr1B	194698559	194698734	CK_peak_707	131.834	+	1	175	0	TraesCS1B03G0385300,TraesCS1B03G0385500	3.9021	1.55844e-41	2.06112e-40	40.8073	39.6859	175
Chr1B	194900645	194900845	CK_peak_708	22.0263	+	1	200	0	TraesCS1B03G0385700	5.3251	1.59846e-07	2.34105e-07	6.7963	6.63059	200
Chr1B	196137209	196137450	CK_peak_709	229.961	+	1	241	0	TraesCS1B03G0388500	4.93472	1.01942e-71	5.95597e-70	70.9916	69.225	241
Chr1B	198378664	198378914	CK_peak_710	106.451	+	1	250	0	TraesCS1B03G0389400	3.47338	1.00031e-33	9.01522e-33	32.9999	32.045	250
Chr1B	204133537	204133637	CK_peak_711	18.3644	+	1	100	0	TraesCS1B03G0395700LC	4.93731	2.30101e-06	2.96327e-06	5.63808	5.52823	100
Chr1B	204137027	204137202	CK_peak_712	63.3429	+	1	175	0	TraesCS1B03G0395700LC	3.60169	2.09098e-20	8.54836e-20	19.6796	19.0681	175
Chr1B	205088500	205088599	CK_peak_713	35.2364	+	1	99	0	TraesCS1B03G0397700	3.91725	1.14544e-11	2.47055e-11	10.941	10.6072	99
Chr1B	206018711	206018836	CK_peak_714	20.3071	+	1	125	0	TraesCS1B03G0398200	3.49193	5.60803e-07	7.70838e-07	6.25119	6.11304	125
Chr1B	213681323	213681498	CK_peak_715	37.1885	+	1	175	0	TraesCS1B03G0404400	3.88198	2.81118e-12	6.38483e-12	11.5511	11.1949	175
Chr1B	222346256	222346581	CK_peak_716	142.689	+	1	325	0	TraesCS1B03G0411500	5.36211	7.07161e-45	1.11285e-43	44.1505	42.9536	325
Chr1B	223135701	223135901	CK_peak_717	165.664	+	1	200	0	TraesCS1B03G0413100	5.50567	6.2316e-52	1.3498e-50	51.2054	49.8697	200
Chr1B	223405259	223405409	CK_peak_718	122.546	+	1	150	0	TraesCS1B03G0413600	3.25638	1.11827e-38	1.28795e-37	37.9515	36.8901	150
Chr1B	228419315	228419615	CK_peak_719	78.309	+	1	300	0	TraesCS1B03G0418900	3.9707	4.89899e-25	2.67088e-24	24.3099	23.5733	300
Chr1B	229238961	229239186	CK_peak_720	52.2983	+	1	225	0	TraesCS1B03G0419200	4.15791	5.54633e-17	1.80564e-16	16.256	15.7434	225
Chr1B	231917686	231917936	CK_peak_721	45.7866	+	1	250	0	TraesCS1B03G0422000	4.75198	5.86721e-15	1.64768e-14	14.2316	13.7831	250
Chr1B	235355797	235355959	CK_peak_722	114.606	+	1	162	0	TraesCS1B03G0424200	3.87368	3.11148e-36	3.16313e-35	35.507	34.4999	162
Chr1B	236114328	236114545	CK_peak_723	269.291	+	1	217	0	TraesCS1B03G0425900	4.43411	8.30354e-84	8.61366e-82	83.0807	81.0648	217
Chr1B	255637401	255637501	CK_peak_724	17.9869	+	1	100	0	TraesCS1B03G0438200	3.34711	3.02587e-06	3.84962e-06	5.51915	5.41458	100
Chr1B	258145798	258145898	CK_peak_725	66.8333	+	1	100	0	TraesCS1B03G0439800	3.62852	1.74187e-21	7.60645e-21	20.759	20.1188	100
Chr1B	258145948	258146048	CK_peak_726	45.9602	+	1	100	0	TraesCS1B03G0439800	3.55852	5.17508e-15	1.46084e-14	14.2861	13.8354	100
Chr1B	258146073	258146273	CK_peak_727	33.4986	+	1	200	0	TraesCS1B03G0439800	3.88551	4.00068e-11	8.23966e-11	10.3979	10.0841	200
Chr1B	262304905	262305205	CK_peak_728	137.925	+	1	300	0	TraesCS1B03G0443100,TraesCS1B03G0443200LC	5.05073	2.08497e-43	3.02222e-42	42.6809	41.5197	300
Chr1B	263015034	263015359	CK_peak_729	280.731	+	1	325	0	TraesCS1B03G0444200	6.0127	2.54291e-87	3.10215e-85	86.5947	84.5083	325
Chr1B	268584258	268584433	CK_peak_730	85.4139	+	1	175	0	TraesCS1B03G0448900	5.29795	3.08942e-27	1.9403e-26	26.5101	25.7121	175
Chr1B	271335279	271335329	CK_peak_731	18.2935	+	1	50	0	TraesCS1B03G0453100	4.62844	2.42175e-06	3.11245e-06	5.61587	5.5069	50
Chr1B	272127470	272127756	CK_peak_732	50.5563	+	2	119,71	0,215	TraesCS1B03G0453600	4.54823	1.93136e-16	6.04006e-16	15.7141	15.219	286
Chr1B	274943635	274943810	CK_peak_733	20.6676	+	1	175	0	TraesCS1B03G0455900	5.24569	4.30725e-07	6.00377e-07	6.3658	6.22158	175
Chr1B	276834081	276834256	CK_peak_734	58.9046	+	1	175	0	TraesCS1B03G0461100	5.2356	4.97931e-19	1.8533e-18	18.3028	17.7321	175
Chr1B	284241063	284241313	CK_peak_735	42.0255	+	1	250	0	TraesCS1B03G0468100	4.79055	8.69435e-14	2.23387e-13	13.0608	12.6509	250
Chr1B	284938951	284939051	CK_peak_736	24.6494	+	1	100	0	TraesCS1B03G0468900	4.29728	2.38826e-08	3.79994e-08	7.62192	7.42022	100
Chr1B	286620809	286621059	CK_peak_737	23.606	+	1	250	0	TraesCS1B03G0473000	4.67736	5.09562e-08	7.83219e-08	7.2928	7.10612	250
Chr1B	294259953	294260103	CK_peak_738	11.5294	+	1	150	0	TraesCS1B03G0483500	3.7102	0.000325631	0.000338298	3.48727	3.4707	150
Chr1B	295486622	295486797	CK_peak_739	48.0392	+	1	175	0	TraesCS1B03G0485900	3.93626	1.16768e-15	3.45745e-15	14.9327	14.4612	175
Chr1B	302887065	302887290	CK_peak_740	29.4017	+	1	225	0	TraesCS1B03G0492700	4.43477	7.72639e-10	1.41e-09	9.11202	8.85078	225
Chr1B	302893586	302893685	CK_peak_741	27.5888	+	1	99	0	TraesCS1B03G0493200	4.08045	2.86405e-09	4.95394e-09	8.54302	8.30505	99
Chr1B	305815125	305815175	CK_peak_742	9.49153	+	1	50	0	TraesCS1B03G0496900	3.75179	0.00138501	0.0013892	2.85855	2.85723	50
Chr1B	305817243	305817531	CK_peak_743	90.9559	+	2	97,65	0,223	TraesCS1B03G0496900	3.81	6.02449e-29	4.16443e-28	28.2201	27.3804	288
Chr1B	308564389	308564514	CK_peak_744	16.6767	+	1	125	0	TraesCS1B03G0501900	4.16481	7.82223e-06	9.54555e-06	5.10667	5.0202	125
Chr1B	311491924	311492174	CK_peak_745	54.3894	+	1	250	0	TraesCS1B03G0505900	3.90041	1.25011e-17	4.2381e-17	16.9031	16.3728	250
Chr1B	315703055	315703255	CK_peak_746	54.1689	+	1	200	0	TraesCS1B03G0512400	3.58162	1.46037e-17	4.93773e-17	16.8355	16.3065	200
Chr1B	316677474	316677849	CK_peak_747	84.4618	+	1	375	0	TraesCS1B03G0513500	4.87414	6.0681e-27	3.75385e-26	26.2169	25.4255	375
Chr1B	320881055	320881280	CK_peak_748	45.0632	+	1	225	0	TraesCS1B03G0517600	3.66116	9.82945e-15	2.72031e-14	14.0075	13.5654	225
Chr1B	323879061	323879286	CK_peak_749	24.0014	+	1	225	0	TraesCS1B03G0521700	5.13109	3.82443e-08	5.95454e-08	7.41743	7.22515	225
Chr1B	328399131	328399406	CK_peak_750	85.9695	+	1	275	0	TraesCS1B03G0528400	4.03148	2.08452e-27	1.32005e-26	26.681	25.8794	275
Chr1B	330624677	330624902	CK_peak_751	74.8557	+	1	225	0	TraesCS1B03G0532800	5.05965	5.71497e-24	2.9254e-23	23.243	22.5338	225
Chr1B	330870906	330871131	CK_peak_752	35.6665	+	1	225	0	TraesCS1B03G0533000	4.21089	8.4196e-12	1.83362e-11	11.0747	10.7367	225
Chr1B	332104030	332104230	CK_peak_753	74.5549	+	1	200	0	TraesCS1B03G0534400	5.88138	7.0732e-24	3.60372e-23	23.1504	22.4432	200
Chr1B	333753323	333753498	CK_peak_754	84.1954	+	1	175	0	TraesCS1B03G0536900	5.4577	7.33389e-27	4.51492e-26	26.1347	25.3454	175
Chr1B	335732844	335733094	CK_peak_755	82.6357	+	1	250	0	TraesCS1B03G0541300	4.38332	2.22312e-26	1.33099e-25	25.653	24.8758	250
Chr1B	338504096	338504146	CK_peak_756	17.8777	+	1	50	0	TraesCS1B03G0547800	4.01349	3.27216e-06	4.15221e-06	5.48517	5.38172	50
Chr1B	339723421	339723471	CK_peak_757	18.1995	+	1	50	0	TraesCS1B03G0549200	3.67464	2.5925e-06	3.32215e-06	5.58628	5.47858	50
Chr1B	342297851	342297926	CK_peak_758	15.3834	+	1	75	0	TraesCS1B03G0552200	4.42883	2.00864e-05	2.33958e-05	4.6971	4.63086	75
Chr1B	342426007	342426207	CK_peak_759	80.8443	+	1	200	0	TraesCS1B03G0552300	4.40425	8.02772e-26	4.60725e-25	25.0954	24.3366	200
Chr1B	342427535	342427660	CK_peak_760	13.1032	+	1	125	0	TraesCS1B03G0552400	5.32885	0.000105097	0.000113646	3.97841	3.94445	125
Chr1B	346673821	346673896	CK_peak_761	18.3275	+	1	75	0	TraesCS1B03G0560300	3.4696	2.3628e-06	3.04003e-06	5.62657	5.51712	75
Chr1B	346818267	346818317	CK_peak_762	17.483	+	1	50	0	TraesCS1B03G0560600LC	5.16816	4.35967e-06	5.45862e-06	5.36055	5.26292	50
Chr1B	347008394	347008569	CK_peak_763	22.5141	+	1	175	0	TraesCS1B03G0560900	4.73423	1.12397e-07	1.66953e-07	6.94925	6.77741	175
Chr1B	347729714	347729889	CK_peak_764	22.5512	+	1	175	0	TraesCS1B03G0562500	5.23012	1.09388e-07	1.62714e-07	6.96103	6.78858	175
Chr1B	348129801	348129951	CK_peak_765	117.477	+	1	150	0	TraesCS1B03G0563100	3.3438	4.04603e-37	4.32361e-36	36.393	35.3642	150
Chr1B	348286156	348286327	CK_peak_766	91.3575	+	1	171	0	TraesCS1B03G0563500	4.56964	4.52142e-29	3.15259e-28	28.3447	27.5013	171
Chr1B	348844911	348845202	CK_peak_767	138.738	+	1	291	0	TraesCS1B03G0564700,TraesCS1B03G0564800	3.80701	1.16936e-43	1.7212e-42	42.9321	41.7642	291
Chr1B	352345278	352345378	CK_peak_768	14.1285	+	1	100	0	TraesCS1B03G0568700,TraesCS1B03G0568800	4.09988	4.99342e-05	5.58327e-05	4.3016	4.25311	100
Chr1B	360080846	360081046	CK_peak_769	19.0366	+	1	200	0	TraesCS1B03G0578000,TraesCS1B03G0578100	5.32444	1.41132e-06	1.85961e-06	5.85037	5.73058	200
Chr1B	360356775	360356950	CK_peak_770	30.7959	+	1	175	0	TraesCS1B03G0578200	4.24749	2.81661e-10	5.36412e-10	9.55027	9.2705	175
Chr1B	363556847	363556922	CK_peak_771	39.5319	+	1	75	0	TraesCS1B03G0583900	3.65506	5.21106e-13	1.25813e-12	12.2831	11.9003	75
Chr1B	365321867	365322042	CK_peak_772	39.2801	+	1	175	0	TraesCS1B03G0586300	4.06353	6.25095e-13	1.49805e-12	12.2041	11.8245	175
Chr1B	365336014	365336139	CK_peak_773	16.6052	+	1	125	0	TraesCS1B03G0586500	3.56836	8.2429e-06	1.00308e-05	5.08392	4.99866	125
Chr1B	366021293	366021418	CK_peak_774	17.8487	+	1	125	0	TraesCS1B03G0587600	3.82776	3.34073e-06	4.23641e-06	5.47616	5.373	125
Chr1B	368715302	368715417	CK_peak_775	45.7188	+	1	115	0	TraesCS1B03G0590400	4.59466	6.16086e-15	1.72697e-14	14.2104	13.7627	115
Chr1B	374487714	374487914	CK_peak_776	36.5447	+	1	200	0	TraesCS1B03G0596400	4.96295	4.47338e-12	9.9758e-12	11.3494	11.0011	200
Chr1B	374616595	374616645	CK_peak_777	19.2115	+	1	50	0	TraesCS1B03G0596500	3.73776	1.24335e-06	1.64726e-06	5.9054	5.78324	50
Chr1B	375263589	375263764	CK_peak_778	39.4917	+	1	175	0	TraesCS1B03G0597800	3.69438	5.36478e-13	1.2936e-12	12.2704	11.8882	175
Chr1B	375263939	375264039	CK_peak_779	19.3025	+	1	100	0	TraesCS1B03G0597800	4.29386	1.16347e-06	1.54653e-06	5.93425	5.81064	100
Chr1B	376231034	376231084	CK_peak_780	18.101	+	1	50	0	TraesCS1B03G0599000	5.81678	2.78636e-06	3.55677e-06	5.55496	5.44894	50
Chr1B	379204407	379204457	CK_peak_781	22.0802	+	1	50	0	TraesCS1B03G0601900	3.80459	1.53826e-07	2.25526e-07	6.81297	6.6468	50
Chr1B	384457100	384457275	CK_peak_782	185.317	+	1	175	0	TraesCS1B03G0609800	3.42683	5.68831e-58	1.63662e-56	57.245	55.7861	175
Chr1B	392181825	392181950	CK_peak_783	63.7022	+	1	125	0	TraesCS1B03G0619600	3.83581	1.61559e-20	6.6638e-20	19.7917	19.1763	125
Chr1B	393313307	393313551	CK_peak_784	67.2511	+	1	244	0	TraesCS1B03G0621200	3.9002	1.29045e-21	5.6939e-21	20.8893	20.2446	244
Chr1B	396597831	396598056	CK_peak_785	107.098	+	1	225	0	TraesCS1B03G0626900	4.31792	6.33735e-34	5.75913e-33	33.1981	32.2396	225
Chr1B	400421059	400421234	CK_peak_786	26.8189	+	1	175	0	TraesCS1B03G0632100	3.54972	4.98979e-09	8.44687e-09	8.30192	8.0733	175
Chr1B	402546504	402546604	CK_peak_787	29.1706	+	1	100	0	TraesCS1B03G0635600	3.8261	9.12506e-10	1.65495e-09	9.03976	8.78122	100
Chr1B	402546629	402546679	CK_peak_788	16.0901	+	1	50	0	TraesCS1B03G0635600	3.77415	1.1989e-05	1.43355e-05	4.92122	4.84359	50
Chr1B	402607064	402607139	CK_peak_789	20.8641	+	1	75	0	TraesCS1B03G0635900	3.53857	3.73274e-07	5.23938e-07	6.42797	6.28072	75
Chr1B	403447721	403447838	CK_peak_790	25.9359	+	1	117	0	TraesCS1B03G0637200	4.50504	9.4354e-09	1.55782e-08	8.02524	7.80748	117
Chr1B	403461529	403461579	CK_peak_791	16.7339	+	1	50	0	TraesCS1B03G0637300	4.05584	7.50643e-06	9.17486e-06	5.12457	5.0374	50
Chr1B	407603154	407603327	CK_peak_792	82.8249	+	1	173	0	TraesCS1B03G0645300	3.83165	1.94219e-26	1.16738e-25	25.7117	24.9328	173
Chr1B	409388509	409388559	CK_peak_793	18.7167	+	1	50	0	TraesCS1B03G0649200	4.77547	1.78276e-06	2.32115e-06	5.74891	5.6343	50
Chr1B	413727870	413727920	CK_peak_794	12.1857	+	1	50	0	TraesCS1B03G0654800	3.83573	0.000203518	0.000214653	3.6914	3.66826	50
Chr1B	414591303	414591428	CK_peak_795	32.8087	+	1	125	0	TraesCS1B03G0655800LC	3.72068	6.57079e-11	1.32924e-10	10.1824	9.8764	125
Chr1B	416754546	416754871	CK_peak_796	284.685	+	1	325	0	TraesCS1B03G0659500	5.2068	1.54851e-88	2.00113e-86	87.8101	85.6987	325
Chr1B	418799897	418800197	CK_peak_797	66.6461	+	1	300	0	TraesCS1B03G0661400LC	4.93382	1.98885e-21	8.66019e-21	20.7014	20.0625	300
Chr1B	421038924	421039124	CK_peak_798	36.2383	+	1	200	0	TraesCS1B03G0664100	5.3625	5.57222e-12	1.23361e-11	11.254	10.9088	200
Chr1B	421150688	421150763	CK_peak_799	23.6228	+	1	75	0	TraesCS1B03G0664400	3.678	5.03253e-08	7.74145e-08	7.29821	7.11118	75
Chr1B	423203079	423203204	CK_peak_800	33.7547	+	1	125	0	TraesCS1B03G0667100	3.74631	3.32477e-11	6.89976e-11	10.4782	10.1612	125
Chr1B	425127876	425127976	CK_peak_801	14.4915	+	1	100	0	TraesCS1B03G0669400	5.47238	3.84062e-05	4.34141e-05	4.4156	4.36237	100
Chr1B	425130942	425131202	CK_peak_802	61.1807	+	2	18124	0,136	TraesCS1B03G0669400	3.3924	9.78048e-20	3.82613e-19	19.0096	18.4172	260
Chr1B	425891098	425891298	CK_peak_803	39.9348	+	1	200	0	TraesCS1B03G0670800	4.02059	3.90003e-13	9.51544e-13	12.4089	12.0216	200
Chr1B	426268522	426268771	CK_peak_804	58.7583	+	1	249	0	TraesCS1B03G0671400	4.1677	5.53099e-19	2.05112e-18	18.2572	17.688	249
Chr1B	427319768	427321290	CK_peak_805	14.6477	+	2	16,59	0,1463	TraesCS1B03G0673500	3.60656	3.4257e-05	3.89578e-05	4.46525	4.40941	1522
Chr1B	429091788	429091913	CK_peak_806	13.1131	+	1	125	0	TraesCS1B03G0676400,TraesCS1B03G0676500LC	4.76513	0.000104316	0.000112864	3.98165	3.94744	125
Chr1B	429523954	429524082	CK_peak_807	11.1082	+	2	42,8	0,120	TraesCS1B03G0677100	5.38924	0.000440553	0.000453	3.356	3.3439	128
Chr1B	432379248	432379373	CK_peak_808	36.6057	+	1	125	0	TraesCS1B03G0681000,TraesCS1B03G0681100	6.35214	4.28193e-12	9.56286e-12	11.3684	11.0194	125
Chr1B	435631618	435631793	CK_peak_809	57.2218	+	1	175	0	TraesCS1B03G0688100LC,TraesCS1B03G0688200	4.064	1.66029e-18	5.95011e-18	17.7798	17.2255	175
Chr1B	439287969	439288086	CK_peak_810	27.7627	+	1	117	0	TraesCS1B03G0693100	3.85045	2.52496e-09	4.39132e-09	8.59775	8.3574	117
Chr1B	444006344	444006676	CK_peak_811	56.3306	+	2	15235	0,97	TraesCS1B03G0700700	3.93189	3.13644e-18	1.10354e-17	17.5036	16.9572	332
Chr1B	444956695	444956970	CK_peak_812	107.657	+	1	275	0	TraesCS1B03G0701500	3.8873	4.26189e-34	3.90797e-33	33.3704	32.408	275
Chr1B	445046760	445046885	CK_peak_813	74.1399	+	1	125	0	TraesCS1B03G0701600	3.50576	9.49964e-24	4.80464e-23	23.0223	22.3183	125
Chr1B	446277044	446277319	CK_peak_814	81.816	+	1	275	0	TraesCS1B03G0704300	4.71289	3.99644e-26	2.34933e-25	25.3983	24.6291	275
Chr1B	447610386	447610655	CK_peak_815	72.5209	+	2	128,72	0,197	TraesCS1B03G0706100,TraesCS1B03G0706200	5.23283	3.00513e-23	1.47585e-22	22.5221	21.831	269
Chr1B	448142205	448142255	CK_peak_816	10.7245	+	1	50	0	TraesCS1B03G0707500LC	4.68214	0.000579235	0.000591017	3.23715	3.2284	50
Chr1B	449533107	449533182	CK_peak_817	21.4407	+	1	75	0	TraesCS1B03G0710100	5.83019	2.45152e-07	3.51314e-07	6.61056	6.4543	75
Chr1B	451707096	451707321	CK_peak_818	118.304	+	1	225	0	TraesCS1B03G0714500	3.91596	2.23982e-37	2.4379e-36	36.6498	35.613	225
Chr1B	453121185	453121374	CK_peak_819	30.5092	+	1	189	0	TraesCS1B03G0716000	9.00684	3.46685e-10	6.54363e-10	9.46006	9.18418	189
Chr1B	454196209	454196309	CK_peak_820	23.8209	+	1	100	0	TraesCS1B03G0717200	3.98139	4.3563e-08	6.7482e-08	7.36088	7.17081	100
Chr1B	454200056	454200256	CK_peak_821	184.05	+	1	200	0	TraesCS1B03G0717200	3.42075	1.39522e-57	3.93993e-56	56.8554	55.4045	200
Chr1B	455338537	455338687	CK_peak_822	22.1921	+	1	150	0	TraesCS1B03G0719800	3.84911	1.4194e-07	2.08702e-07	6.84789	6.68047	150
Chr1B	455653902	455654077	CK_peak_823	43.0656	+	1	175	0	TraesCS1B03G0720100	3.73698	4.12117e-14	1.08632e-13	13.385	12.964	175
Chr1B	455967200	455967375	CK_peak_824	15.5847	+	1	175	0	TraesCS1B03G0721300	6.77534	1.7348e-05	2.03492e-05	4.76075	4.69145	175
Chr1B	457018409	457018634	CK_peak_825	54.6635	+	1	225	0	TraesCS1B03G0722400	6.43566	1.02872e-17	3.50467e-17	16.9877	16.4554	225
Chr1B	457844423	457844698	CK_peak_826	83.1579	+	1	275	0	TraesCS1B03G0723300	5.06016	1.52912e-26	9.26773e-26	25.8156	25.033	275
Chr1B	457949461	457949711	CK_peak_827	90.6913	+	1	250	0	TraesCS1B03G0723500	4.37124	7.25999e-29	5.0026e-28	28.1391	27.3008	250
Chr1B	458677412	458677587	CK_peak_828	71.247	+	1	175	0	TraesCS1B03G0724900	5.10159	7.41904e-23	3.56886e-22	22.1297	21.4475	175
Chr1B	459264695	459264795	CK_peak_829	36.9752	+	1	100	0	TraesCS1B03G0725800	3.89766	3.27946e-12	7.40209e-12	11.4842	11.1306	100
Chr1B	461114974	461115199	CK_peak_830	88.0269	+	1	225	0	TraesCS1B03G0728600	4.5271	4.80018e-28	3.17148e-27	27.3187	26.4987	225
Chr1B	463752009	463752134	CK_peak_831	18.8123	+	1	125	0	TraesCS1B03G0731800	5.35099	1.66295e-06	2.17239e-06	5.77912	5.66306	125
Chr1B	465805710	465805878	CK_peak_832	26.1591	+	1	168	0	TraesCS1B03G0733900	4.27336	8.0337e-09	1.33449e-08	8.09508	7.87469	168
Chr1B	465813357	465813557	CK_peak_833	42.0702	+	1	200	0	TraesCS1B03G0734100	3.9728	8.41942e-14	2.16578e-13	13.0747	12.6644	200
Chr1B	469401350	469402089	CK_peak_834	47.1925	+	2	46,29	0,710	TraesCS1B03G0738000	3.51502	2.13914e-15	6.21803e-15	14.6698	14.2063	739
Chr1B	470587696	470587946	CK_peak_835	72.27	+	1	250	0	TraesCS1B03G0739200,TraesCS1B03G0739300LC	4.89114	3.58749e-23	1.7562e-22	22.4452	21.7554	250
Chr1B	471557711	471557786	CK_peak_836	10.9905	+	1	75	0	TraesCS1B03G0741000	4.27213	0.000479024	0.000491498	3.31964	3.30848	75
Chr1B	471574532	471574757	CK_peak_837	340.724	+	1	225	0	TraesCS1B03G0741000	5.22725	1.08157e-105	2.70374e-103	104.966	102.568	225
Chr1B	471946102	471946302	CK_peak_838	211.389	+	1	200	0	TraesCS1B03G0741600	5.38536	5.25057e-66	2.32075e-64	65.2798	63.6344	200
Chr1B	475822174	475822274	CK_peak_839	16.4967	+	1	100	0	TraesCS1B03G0745900	4.10413	8.9116e-06	1.08143e-05	5.05004	4.966	100
Chr1B	475828287	475828487	CK_peak_840	95.5454	+	1	200	0	TraesCS1B03G0745900	3.90642	2.30825e-30	1.72965e-29	29.6367	28.762	200
Chr1B	475852329	475852528	CK_peak_841	155.31	+	1	199	0	TraesCS1B03G0746000	3.84589	9.28902e-49	1.76619e-47	48.032	46.753	199
Chr1B	477967017	477967117	CK_peak_842	56.9849	+	1	100	0	TraesCS1B03G0750300	3.61857	1.96672e-18	7.01203e-18	17.7063	17.1542	100
Chr1B	482211540	482211740	CK_peak_843	38.0439	+	1	200	0	TraesCS1B03G0756000	3.89531	1.51977e-12	3.529e-12	11.8182	11.4523	200
Chr1B	482282125	482282225	CK_peak_844	10.3068	+	1	100	0	TraesCS1B03G0756400	4.05654	0.000779369	0.000789464	3.10826	3.10267	100
Chr1B	483591060	483591110	CK_peak_845	24.605	+	1	50	0	TraesCS1B03G0758600	3.33317	2.46606e-08	3.91882e-08	7.608	7.40685	50
Chr1B	483602876	483603001	CK_peak_846	45.0859	+	1	125	0	TraesCS1B03G0758900	3.77742	9.66309e-15	2.67795e-14	14.0149	13.5722	125
Chr1B	484905620	484905820	CK_peak_847	81.5171	+	1	200	0	TraesCS1B03G0760600	4.83021	4.95801e-26	2.89009e-25	25.3047	24.5391	200
Chr1B	486997391	486997566	CK_peak_848	78.0615	+	1	175	0	TraesCS1B03G0762600	3.43584	5.84686e-25	3.17065e-24	24.2331	23.4989	175
Chr1B	487017493	487017641	CK_peak_849	27.0294	+	1	148	0	TraesCS1B03G0763000	4.72606	4.28802e-09	7.30022e-09	8.36774	8.13666	148
Chr1B	487024634	487024709	CK_peak_850	15.8448	+	1	75	0	TraesCS1B03G0763200	5.4662	1.43496e-05	1.69915e-05	4.84316	4.76977	75
Chr1B	490458358	490458433	CK_peak_851	17.7352	+	1	75	0	TraesCS1B03G0767900	8.50125	3.62781e-06	4.58331e-06	5.44036	5.33882	75
Chr1B	494350934	494351109	CK_peak_852	67.5703	+	1	175	0	TraesCS1B03G0776500	4.7427	1.02588e-21	4.5635e-21	20.9889	20.3407	175
Chr1B	497209048	497209348	CK_peak_853	87.2839	+	1	300	0	TraesCS1B03G0783000	5.54814	8.16981e-28	5.30811e-27	27.0878	26.2751	300
Chr1B	497652850	497653000	CK_peak_854	16.1474	+	1	150	0	TraesCS1B03G0786400	5.66665	1.14916e-05	1.37764e-05	4.93962	4.86087	150
Chr1B	497655729	497655804	CK_peak_855	17.9155	+	1	75	0	TraesCS1B03G0786400	3.50492	3.18432e-06	4.04479e-06	5.49698	5.3931	75
Chr1B	498910272	498910389	CK_peak_856	13.1767	+	1	117	0	TraesCS1B03G0789500LC,TraesCS1B03G0789600	7.32831	9.96144e-05	0.000108	4.00168	3.96658	117
Chr1B	504718049	504718710	CK_peak_857	9.99153	+	2	36,14	0,647	TraesCS1B03G0797600	5.06939	0.000975288	0.00098231	3.01087	3.00775	661
Chr1B	504772824	504772986	CK_peak_858	141.777	+	1	162	0	TraesCS1B03G0798200	4.06996	1.3465e-44	2.09305e-43	43.8708	42.6792	162
Chr1B	508703928	508704003	CK_peak_859	10.2149	+	1	75	0	TraesCS1B03G0805100	3.18167	0.000831969	0.000841405	3.07989	3.075	75
Chr1B	510143723	510143834	CK_peak_860	13.1574	+	1	111	0	TraesCS1B03G0808300,TraesCS1B03G0808400LC	3.96889	0.000101003	0.000109451	3.99566	3.96078	111
Chr1B	514434156	514434306	CK_peak_861	43.3974	+	1	150	0	TraesCS1B03G0812400	3.74205	3.25483e-14	8.63112e-14	13.4875	13.0639	150
Chr1B	514580949	514581043	CK_peak_862	16.969	+	1	94	0	TraesCS1B03G0812700	3.57578	6.33204e-06	7.79506e-06	5.19846	5.10818	94
Chr1B	515033855	515034131	CK_peak_863	13.1113	+	2	67,58	0,218	TraesCS1B03G0814100	3.47307	0.000104466	0.000113011	3.98103	3.94688	276
Chr1B	515917943	515918093	CK_peak_864	27.2769	+	1	150	0	TraesCS1B03G0815600	4.40734	3.58909e-09	6.14944e-09	8.44502	8.21116	150
Chr1B	518171383	518171608	CK_peak_865	87.9385	+	1	225	0	TraesCS1B03G0819100	3.47348	5.11472e-28	3.372e-27	27.2912	26.4721	225
Chr1B	518434764	518434883	CK_peak_866	47.877	+	1	119	0	TraesCS1B03G0819700	3.58281	1.31019e-15	3.86891e-15	14.8827	14.4124	119
Chr1B	525322039	525322214	CK_peak_867	23.861	+	1	175	0	TraesCS1B03G0828400	3.98817	4.22906e-08	6.56309e-08	7.37376	7.18289	175
Chr1B	526880570	526880745	CK_peak_868	31.6402	+	1	175	0	TraesCS1B03G0831000	4.53098	1.53372e-10	2.9877e-10	9.81425	9.52466	175
Chr1B	527288002	527288284	CK_peak_869	18.853	+	2	28147	0,135	TraesCS1B03G0832200	8.69041	1.61288e-06	2.11187e-06	5.7924	5.67533	282
Chr1B	528858856	528859048	CK_peak_870	103.176	+	1	192	0	TraesCS1B03G0835000	4.09242	1.02718e-32	8.73105e-32	31.9884	31.0589	192
Chr1B	533129769	533129919	CK_peak_871	18.0296	+	1	150	0	TraesCS1B03G0840600	4.31364	2.93282e-06	3.73715e-06	5.53272	5.42746	150
Chr1B	533137280	533137441	CK_peak_872	46.7413	+	1	161	0	TraesCS1B03G0840600	3.66944	2.96128e-15	8.50085e-15	14.5285	14.0705	161
Chr1B	537106118	537106243	CK_peak_873	38.014	+	1	125	0	TraesCS1B03G0847800	3.69226	1.55241e-12	3.60294e-12	11.809	11.4433	125
Chr1B	540471029	540471104	CK_peak_874	28.017	+	1	75	0	TraesCS1B03G0854300	3.99595	2.09838e-09	3.68177e-09	8.67812	8.43394	75
Chr1B	543197324	543197591	CK_peak_875	37.2761	+	2	147,28	0,239	TraesCS1B03G0859400	3.62015	2.63925e-12	6.00866e-12	11.5785	11.2212	267
Chr1B	544282684	544282784	CK_peak_876	21.0814	+	1	100	0	TraesCS1B03G0861700	4.04422	3.18623e-07	4.50676e-07	6.49672	6.34614	100
Chr1B	546153069	546153219	CK_peak_877	30.1157	+	1	150	0	TraesCS1B03G0864700	3.53575	4.60969e-10	8.5954e-10	9.33633	9.06573	150
Chr1B	547310256	547310406	CK_peak_878	20.4395	+	1	150	0	TraesCS1B03G0868000,TraesCS1B03G0868100	5.88244	5.08977e-07	7.03215e-07	6.2933	6.15291	150
Chr1B	547620170	547620330	CK_peak_879	21.5301	+	1	160	0	TraesCS1B03G0869000	3.61956	2.298e-07	3.30213e-07	6.63865	6.48121	160
Chr1B	549543450	549543517	CK_peak_880	22.0033	+	1	67	0	TraesCS1B03G0873200	3.58952	1.62541e-07	2.37869e-07	6.78904	6.62366	67
Chr1B	549636885	549637010	CK_peak_881	46.3956	+	1	125	0	TraesCS1B03G0873400	3.45862	3.79149e-15	1.08028e-14	14.4212	13.9665	125
Chr1B	552383633	552383733	CK_peak_882	38.5767	+	1	100	0	TraesCS1B03G0880700	3.50647	1.03817e-12	2.4393e-12	11.9837	11.6127	100
Chr1B	554700027	554700252	CK_peak_883	61.5869	+	1	225	0	TraesCS1B03G0885100	6.87583	7.32177e-20	2.88724e-19	19.1354	18.5395	225
Chr1B	560328446	560328621	CK_peak_884	22.6012	+	1	175	0	TraesCS1B03G0897700	4.38137	1.05417e-07	1.57167e-07	6.97709	6.80364	175
Chr1B	564603913	564604013	CK_peak_885	11.7985	+	1	100	0	TraesCS1B03G0909400LC	6.83914	0.000268874	0.00028073	3.57045	3.55171	100
Chr1B	566250308	566250454	CK_peak_886	34.4137	+	1	146	0	TraesCS1B03G0912500	4.5451	2.06775e-11	4.36962e-11	10.6845	10.3596	146
Chr1B	572442180	572442230	CK_peak_887	12.1212	+	1	50	0	TraesCS1B03G0926300	4.1942	0.000213142	0.000224462	3.67133	3.64886	50
Chr1B	572442255	572442355	CK_peak_888	12.5384	+	1	100	0	TraesCS1B03G0926300	5.84493	0.000157775	0.000168105	3.80196	3.77442	100
Chr1B	572443742	572443817	CK_peak_889	9.65507	+	1	75	0	TraesCS1B03G0926300	4.12012	0.00123568	0.00124032	2.90809	2.90647	75
Chr1B	572444677	572444999	CK_peak_890	90.3349	+	1	322	0	TraesCS1B03G0926300	6.27554	9.34115e-29	6.40466e-28	28.0296	27.1935	322
Chr1B	573485034	573485209	CK_peak_891	24.1062	+	1	175	0	TraesCS1B03G0929600	8.27021	3.53942e-08	5.53736e-08	7.45107	7.2567	175
Chr1B	573622966	573630569	CK_peak_892	68.1031	+	2	172,3	0,7600	TraesCS1B03G0930600,TraesCS1B03G0930700LC,TraesCS1B03G0930800LC,TraesCS1B03G0930900LC	4.84539	7.03755e-22	3.15449e-21	21.1526	20.5011	7603
Chr1B	573630988	573631180	CK_peak_893	498.283	+	1	192	0	TraesCS1B03G0930600	4.60662	7.9045e-154	1.00446e-150	153.102	149.998	192
Chr1B	575352637	575352837	CK_peak_894	148.126	+	1	200	0	TraesCS1B03G0934600	4.60448	1.51092e-46	2.56857e-45	45.8208	44.5903	200
Chr1B	579459690	579460065	CK_peak_895	62.2252	+	1	375	0	TraesCS1B03G0945200	5.02731	4.63235e-20	1.85501e-19	19.3342	18.7317	375
Chr1B	579721261	579721386	CK_peak_896	30.3247	+	1	125	0	TraesCS1B03G0945800	4.58441	3.96086e-10	7.43648e-10	9.40221	9.12863	125
Chr1B	582733491	582733616	CK_peak_897	16.4485	+	1	125	0	TraesCS1B03G0950200	4.10189	9.22868e-06	1.11813e-05	5.03486	4.95151	125
Chr1B	583222341	583222541	CK_peak_898	71.082	+	1	200	0	TraesCS1B03G0951200,TraesCS1B03G0951300LC	3.52974	8.35446e-23	4.00117e-22	22.0781	21.3978	200
Chr1B	586825622	586825697	CK_peak_899	10.0978	+	1	75	0	TraesCS1B03G0956800LC	3.32635	0.000904692	0.000912531	3.0435	3.03975	75
Chr1B	587681351	587681651	CK_peak_900	239.901	+	1	300	0	TraesCS1B03G0959000	4.40687	9.18046e-75	6.0603e-73	74.0371	72.2175	300
Chr1B	589945124	589945199	CK_peak_901	29.5586	+	1	75	0	TraesCS1B03G0962300	3.62243	6.88704e-10	1.2647e-09	9.16197	8.89801	75
Chr1B	592836326	592836401	CK_peak_902	20.248	+	1	75	0	TraesCS1B03G0973700LC	4.98287	5.85309e-07	8.03075e-07	6.23261	6.09524	75
Chr1B	601220128	601220303	CK_peak_903	19.8674	+	1	175	0	TraesCS1B03G0994700	4.07276	7.71742e-07	1.04551e-06	6.11253	5.98067	175
Chr1B	604605267	604605417	CK_peak_904	42.3126	+	1	150	0	TraesCS1B03G1001800	3.60401	7.0773e-14	1.83073e-13	13.1501	12.7374	150
Chr1B	604853570	604853645	CK_peak_905	20.056	+	1	75	0	TraesCS1B03G1002400	4.35947	6.72754e-07	9.17359e-07	6.17214	6.03746	75
Chr1B	604856998	604857173	CK_peak_906	71.7837	+	1	175	0	TraesCS1B03G1002400	3.42614	5.06397e-23	2.46003e-22	22.2955	21.6091	175
Chr1B	605429290	605429390	CK_peak_907	25.6469	+	1	100	0	TraesCS1B03G1003000	5.1063	1.16157e-08	1.90337e-08	7.93496	7.72048	100
Chr1B	605459368	605459443	CK_peak_908	14.5402	+	1	75	0	TraesCS1B03G1003200	5.47377	3.70712e-05	4.19735e-05	4.43096	4.37702	75
Chr1B	606021086	606021461	CK_peak_909	118.048	+	1	375	0	TraesCS1B03G1004700	4.23067	2.68821e-37	2.9114e-36	36.5705	35.5359	375
Chr1B	606465836	606465936	CK_peak_910	21.213	+	1	100	0	TraesCS1B03G1006300	3.53424	2.8947e-07	4.11382e-07	6.5384	6.38576	100
Chr1B	606471008	606471158	CK_peak_911	19.0426	+	1	150	0	TraesCS1B03G1006400	4.2234	1.40519e-06	1.85185e-06	5.85227	5.7324	150
Chr1B	610457901	610457951	CK_peak_912	14.0045	+	1	50	0	TraesCS1B03G1015900	4.83048	5.46453e-05	6.08461e-05	4.26245	4.21577	50
Chr1B	611477317	611477542	CK_peak_913	83.9841	+	1	225	0	TraesCS1B03G1018600	6.23304	8.52197e-27	5.22733e-26	26.0695	25.2817	225
Chr1B	611704270	611704320	CK_peak_914	13.3126	+	1	50	0	TraesCS1B03G1018800	4.29104	9.02005e-05	9.82898e-05	4.04479	4.00749	50
Chr1B	611708683	611708858	CK_peak_915	67.9957	+	1	175	0	TraesCS1B03G1018900	3.99256	7.5972e-22	3.39835e-21	21.1193	20.4687	175
Chr1B	613068732	613068932	CK_peak_916	45.4689	+	1	200	0	TraesCS1B03G1022000,TraesCS1B03G1022100	6.08744	7.35825e-15	2.05355e-14	14.1332	13.6875	200
Chr1B	620083188	620083238	CK_peak_917	13.2634	+	1	50	0	TraesCS1B03G1034700	4.41658	9.35048e-05	0.000101701	4.02917	3.99267	50
Chr1B	620096264	620096564	CK_peak_918	209.99	+	1	300	0	TraesCS1B03G1034700	5.2508	1.42033e-65	6.11824e-64	64.8476	63.2134	300
Chr1B	620418259	620418456	CK_peak_919	47.2918	+	1	197	0	TraesCS1B03G1036100	4.36199	1.99227e-15	5.80439e-15	14.7007	14.2362	197
Chr1B	621875963	621876163	CK_peak_920	105.906	+	1	200	0	TraesCS1B03G1039700	4.83296	1.47975e-33	1.31588e-32	32.8298	31.8808	200
Chr1B	624890548	624890717	CK_peak_921	87.7117	+	1	169	0	TraesCS1B03G1044700	3.60124	6.0242e-28	3.946e-27	27.2201	26.4038	169
Chr1B	628321716	628321766	CK_peak_922	17.0573	+	1	50	0	TraesCS1B03G1051100	5.02821	5.93656e-06	7.33246e-06	5.22647	5.13475	50
Chr1B	628324362	628324637	CK_peak_923	219.045	+	1	275	0	TraesCS1B03G1051100	4.14856	2.31572e-68	1.15024e-66	67.6353	65.9392	275
Chr1B	629262631	629262681	CK_peak_924	18.9304	+	1	50	0	TraesCS1B03G1053200	4.45983	1.52381e-06	2.0016e-06	5.81707	5.69862	50
Chr1B	629357113	629357163	CK_peak_925	23.0773	+	1	50	0	TraesCS1B03G1053300	4.65915	7.47265e-08	1.1299e-07	7.12653	6.94696	50
Chr1B	630707425	630707550	CK_peak_926	15.3537	+	1	125	0	TraesCS1B03G1056200	4.36027	2.05282e-05	2.3883e-05	4.68765	4.62191	125
Chr1B	631757578	631757678	CK_peak_927	16.3585	+	1	100	0	TraesCS1B03G1059900,TraesCS1B03G1060000	3.96383	9.85451e-06	1.19017e-05	5.00636	4.92439	100
Chr1B	633286181	633286281	CK_peak_928	38.4641	+	1	100	0	TraesCS1B03G1064200	4.10726	1.12451e-12	2.63729e-12	11.949	11.5788	100
Chr1B	634146106	634146206	CK_peak_929	25.6146	+	1	100	0	TraesCS1B03G1068800	3.59659	1.18871e-08	1.94638e-08	7.92492	7.71077	100
Chr1B	635049265	635049390	CK_peak_930	16.6901	+	1	125	0	TraesCS1B03G1070700	4.0117	7.74656e-06	9.45775e-06	5.11089	5.02421	125
Chr1B	636070947	636071022	CK_peak_931	10.0737	+	1	75	0	TraesCS1B03G1073500	4.28951	0.000920358	0.000927903	3.03604	3.0325	75
Chr1B	636253298	636253398	CK_peak_932	27.5122	+	1	100	0	TraesCS1B03G1074200LC	4.73322	3.02742e-09	5.22408e-09	8.51893	8.28199	100
Chr1B	637130256	637130481	CK_peak_933	54.1566	+	1	225	0	TraesCS1B03G1077000,TraesCS1B03G1077100	5.41263	1.47359e-17	4.98022e-17	16.8316	16.3028	225
Chr1B	639060444	639060619	CK_peak_934	23.8004	+	1	175	0	TraesCS1B03G1083000,TraesCS1B03G1083100	5.29891	4.4221e-08	6.84478e-08	7.35437	7.16464	175
Chr1B	644729474	644729724	CK_peak_935	92.9201	+	1	250	0	TraesCS1B03G1104400	4.18289	1.48378e-29	1.06727e-28	28.8286	27.9717	250
Chr1B	646845500	646845592	CK_peak_936	29.0106	+	1	92	0	TraesCS1B03G1117500	3.79804	1.02363e-09	1.84902e-09	8.98986	8.73306	92
Chr1B	648949468	648949616	CK_peak_937	69.7961	+	1	148	0	TraesCS1B03G1123500	5.10632	2.09786e-22	9.75612e-22	21.6782	21.0107	148
Chr1B	650625096	650625246	CK_peak_938	120.81	+	1	150	0	TraesCS1B03G1132300,TraesCS1B03G1132400LC	3.3589	3.83883e-38	4.29167e-37	37.4158	36.3674	150
Chr1B	655781682	655781877	CK_peak_939	97.6503	+	1	195	0	TraesCS1B03G1148100	5.60406	5.18924e-31	4.02087e-30	30.2849	29.3957	195
Chr1B	656745594	656745719	CK_peak_940	13.5997	+	1	125	0	TraesCS1B03G1150600,TraesCS1B03G1150700LC	4.15931	7.32865e-05	8.05554e-05	4.13498	4.09391	125
Chr1B	658593240	658593415	CK_peak_941	30.7552	+	1	175	0	TraesCS1B03G1152500	3.99076	2.90167e-10	5.51783e-10	9.53735	9.25823	175
Chr1B	658854510	658854635	CK_peak_942	19.6709	+	1	125	0	TraesCS1B03G1153400	4.99491	8.91052e-07	1.19799e-06	6.0501	5.92155	125
Chr1B	658854685	658854871	CK_peak_943	108.789	+	1	186	0	TraesCS1B03G1153400	4.44241	1.90987e-34	1.78345e-33	33.719	32.7487	186
Chr1B	659788585	659788635	CK_peak_944	21.5328	+	1	50	0	TraesCS1B03G1155300	3.73637	2.29344e-07	3.29588e-07	6.63951	6.48203	50
Chr1B	659788660	659788760	CK_peak_945	25.4933	+	1	100	0	TraesCS1B03G1155300	3.99954	1.29743e-08	2.11713e-08	7.88692	7.67425	100
Chr1B	661203070	661203239	CK_peak_946	185.018	+	1	169	0	TraesCS1B03G1160300	4.80355	7.06346e-58	2.01328e-56	57.151	55.6961	169
Chr1B	663158124	663158187	CK_peak_947	37.7177	+	1	63	0	TraesCS1B03G1166600	3.7295	1.91659e-12	4.42417e-12	11.7175	11.3542	63
Chr1B	664570486	664570636	CK_peak_948	160.43	+	1	150	0	TraesCS1B03G1169100	3.90893	2.49078e-50	5.0778e-49	49.6037	48.2943	150
Chr1B	664620812	664620887	CK_peak_949	20.1272	+	1	75	0	TraesCS1B03G1169500	3.44086	6.38874e-07	8.73191e-07	6.19458	6.05889	75
Chr1B	664805171	664805221	CK_peak_950	19.0149	+	1	50	0	TraesCS1B03G1170500	3.49991	1.43388e-06	1.8877e-06	5.84349	5.72407	50
Chr1B	665826734	665826909	CK_peak_951	67.0443	+	1	175	0	TraesCS1B03G1171700	4.9804	1.49659e-21	6.57112e-21	20.8249	20.1824	175
Chr1B	666918091	666918231	CK_peak_952	54.1537	+	1	140	0	TraesCS1B03G1175500	4.05875	1.47682e-17	4.99002e-17	16.8307	16.3019	140
Chr1B	668209499	668209624	CK_peak_953	26.2137	+	1	125	0	TraesCS1B03G1177500	5.1905	7.72055e-09	1.28499e-08	8.11235	7.8911	125
Chr1B	672840466	672840680	CK_peak_954	20.4375	+	2	85,40	0,174	TraesCS1B03G1190200	3.98357	5.09823e-07	7.04194e-07	6.29258	6.15231	214
Chr1B	672857426	672857776	CK_peak_955	467.712	+	1	350	0	TraesCS1B03G1190400	5.32499	1.36562e-144	1.60187e-141	143.865	140.795	350
Chr1B	677486978	677487153	CK_peak_956	147.394	+	1	175	0	TraesCS1B03G1209500	3.66729	2.53696e-46	4.26528e-45	45.5957	44.3701	175
Chr1B	677514842	677514942	CK_peak_957	50.2071	+	1	100	0	TraesCS1B03G1210400	4.33758	2.48098e-16	7.69421e-16	15.6054	15.1138	100
Chr1B	678467118	678467193	CK_peak_958	20.5731	+	1	75	0	TraesCS1B03G1215600	3.4629	4.61608e-07	6.41021e-07	6.33573	6.19313	75
Chr1B	679342085	679342235	CK_peak_959	39.4248	+	1	150	0	TraesCS1B03G1221300	3.9189	5.63374e-13	1.35503e-12	12.2492	11.8681	150
Chr1B	682406540	682406809	CK_peak_960	75.9935	+	1	269	0	TraesCS1B03G1235100	4.22812	2.53442e-24	1.32946e-23	23.5961	22.8763	269
Chr1B	683182047	683182197	CK_peak_961	25.1881	+	1	150	0	TraesCS1B03G1238300	4.04878	1.6189e-08	2.61594e-08	7.79078	7.58237	150
Chr1B	685622612	685622762	CK_peak_962	32.0325	+	1	150	0	TraesCS1B03G1248500	3.93258	1.15356e-10	2.27652e-10	9.93796	9.64273	150
Chr1B	687089027	687089202	CK_peak_963	24.4224	+	1	175	0	TraesCS1B03G1252300	4.16244	2.8139e-08	4.44746e-08	7.55069	7.35189	175
Chr1B	692735472	692735522	CK_peak_964	22.0649	+	1	50	0	TraesCS1B03G1269100	3.88205	1.55499e-07	2.27935e-07	6.80827	6.64219	50
Chr1B	692739596	692739821	CK_peak_965	241.501	+	1	225	0	TraesCS1B03G1269100	4.52831	2.97701e-75	1.99984e-73	74.5262	72.699	225
Chr1B	695421606	695421681	CK_peak_966	10.5992	+	1	75	0	TraesCS1B03G1275700	5.16075	0.000633577	0.000644653	3.1982	3.19067	75
Chr1B	695602494	695602544	CK_peak_967	15.7422	+	1	50	0	TraesCS1B03G1276600	5.53346	1.54636e-05	1.82441e-05	4.81069	4.73888	50
Chr1B	696636523	696636598	CK_peak_968	37.6216	+	1	75	0	TraesCS1B03G1278400	3.8268	2.05517e-12	4.72902e-12	11.6872	11.3252	75
Chr1B	697670258	697670333	CK_peak_969	14.4501	+	1	75	0	TraesCS1B03G1281400	3.85266	3.9602e-05	4.46764e-05	4.40228	4.34992	75
Chr1B	697749627	697749802	CK_peak_970	23.0167	+	1	175	0	TraesCS1B03G1281700	4.26478	7.81131e-08	1.17835e-07	7.10728	6.92872	175
Chr1B	1191640	1191756	CK_peak_971	34.2785	-	1	116	0	TraesCS1B03G0001600,TraesCS1B03G0001700LC	3.57722	2.28004e-11	4.79893e-11	10.6421	10.3189	116
Chr1B	1407277	1407352	CK_peak_972	32.1806	-	1	75	0	TraesCS1B03G0003100	4.37981	1.03449e-10	2.05429e-10	9.98527	9.68734	75
Chr1B	4532574	4532749	CK_peak_973	25.9659	-	1	175	0	TraesCS1B03G0015900	3.73275	9.23443e-09	1.5258e-08	8.03459	7.8165	175
Chr1B	9594353	9594403	CK_peak_974	21.9341	-	1	50	0	TraesCS1B03G0038800	5.21817	1.70978e-07	2.49568e-07	6.76706	6.60281	50
Chr1B	10646032	10646182	CK_peak_975	165.055	-	1	150	0	TraesCS1B03G0045000	3.56441	9.58e-52	2.05754e-50	51.0186	49.6867	150
Chr1B	12379941	12380116	CK_peak_976	20.9417	-	1	175	0	TraesCS1B03G0048900	4.6528	3.52988e-07	4.96515e-07	6.45224	6.30407	175
Chr1B	15872263	15872438	CK_peak_977	28.0551	-	1	175	0	TraesCS1B03G0061700LC	5.02552	2.04011e-09	3.58572e-09	8.69035	8.44542	175
Chr1B	15893547	15893897	CK_peak_978	141.148	-	1	350	0	TraesCS1B03G0061900	5.30206	2.10404e-44	3.23759e-43	43.6769	42.4898	350
Chr1B	16016683	16016833	CK_peak_979	40.8313	-	1	150	0	TraesCS1B03G0062400	3.76729	2.05018e-13	5.1117e-13	12.6882	12.2914	150
Chr1B	18627658	18627733	CK_peak_980	19.2529	-	1	75	0	TraesCS1B03G0075600	4.46699	1.20649e-06	1.60064e-06	5.91848	5.79571	75
Chr1B	21385052	21385102	CK_peak_981	44.1965	-	1	50	0	TraesCS1B03G0084700	3.71325	1.82977e-14	4.96038e-14	13.7376	13.3045	50
Chr1B	21630893	21630993	CK_peak_982	18.0518	-	1	100	0	TraesCS1B03G0085000	4.61806	2.88586e-06	3.68008e-06	5.53973	5.43414	100
Chr1B	25368517	25368617	CK_peak_983	15.6001	-	1	100	0	TraesCS1B03G0093600	5.36863	1.71511e-05	2.01321e-05	4.76571	4.69611	100
Chr1B	26452551	26452626	CK_peak_984	16.418	-	1	75	0	TraesCS1B03G0096900	4.05304	9.43927e-06	1.1421e-05	5.02506	4.9423	75
Chr1B	27651090	27651240	CK_peak_985	262.121	-	1	150	0	TraesCS1B03G0099700,TraesCS1B03G0099800LC	4.7195	1.35893e-81	1.24086e-79	80.8668	78.9063	150
Chr1B	27652809	27652859	CK_peak_986	10.5768	-	1	50	0	TraesCS1B03G0099700,TraesCS1B03G0099800LC	4.50967	0.00064384	0.000654746	3.19122	3.18393	50
Chr1B	36027808	36027908	CK_peak_987	20.1889	-	1	100	0	TraesCS1B03G0120000LC	5.46639	6.11128e-07	8.36618e-07	6.21387	6.07747	100
Chr1B	45453770	45454020	CK_peak_988	151.387	-	1	250	0	TraesCS1B03G0138600	4.72481	1.50082e-47	2.67985e-46	46.8237	45.5719	250
Chr1B	46186076	46186201	CK_peak_989	46.1287	-	1	125	0	TraesCS1B03G0139900	3.75469	4.58512e-15	1.29984e-14	14.3386	13.8861	125
Chr1B	47605364	47605414	CK_peak_990	14.8538	-	1	50	0	TraesCS1B03G0142900	3.60888	2.95149e-05	3.37714e-05	4.52996	4.47145	50
Chr1B	50425759	50426009	CK_peak_991	63.232	-	1	250	0	TraesCS1B03G0147400LC,TraesCS1B03G0147500	3.94389	2.26043e-20	9.23119e-20	19.6458	19.0347	250
Chr1B	58753140	58753265	CK_peak_992	80.5536	-	1	125	0	TraesCS1B03G0174000	4.05472	9.87905e-26	5.63583e-25	25.0053	24.249	125
Chr1B	59626990	59627115	CK_peak_993	19.7771	-	1	125	0	TraesCS1B03G0176400	5.77021	8.24183e-07	1.113e-06	6.08398	5.95351	125
Chr1B	61555736	61555786	CK_peak_994	17.6501	-	1	50	0	TraesCS1B03G0181700	4.44988	3.85989e-06	4.8616e-06	5.41343	5.31322	50
Chr1B	67325552	67325727	CK_peak_995	67.9023	-	1	175	0	TraesCS1B03G0198100	4.63237	8.11926e-22	3.62549e-21	21.0905	20.4406	175
Chr1B	75323114	75323289	CK_peak_996	30.1775	-	1	175	0	TraesCS1B03G0216600	4.66069	4.40733e-10	8.23518e-10	9.35582	9.08433	175
Chr1B	88989828	88990103	CK_peak_997	77.0687	-	1	275	0	TraesCS1B03G0229300	4.77031	1.18257e-24	6.30966e-24	23.9272	23.2	275
Chr1B	96667481	96667556	CK_peak_998	13.2302	-	1	75	0	TraesCS1B03G0238600	4.1017	9.58166e-05	0.000104067	4.01856	3.98268	75
Chr1B	97144151	97144351	CK_peak_999	105.854	-	1	200	0	TraesCS1B03G0239600	4.4594	1.53517e-33	1.36342e-32	32.8138	31.8654	200
Chr1B	101479923	101479998	CK_peak_1000	17.8464	-	1	75	0	TraesCS1B03G0249100	4.96465	3.34678e-06	4.24338e-06	5.47537	5.37229	75
Chr1B	102799088	102799188	CK_peak_1001	38.1029	-	1	100	0	TraesCS1B03G0252800	3.64871	1.45686e-12	3.38756e-12	11.8366	11.4701	100
Chr1B	105007156	105007356	CK_peak_1002	203.197	-	1	200	0	TraesCS1B03G0255400	3.96919	1.74413e-63	6.78474e-62	62.7584	61.1685	200
Chr1B	106919786	106919911	CK_peak_1003	16.4863	-	1	125	0	TraesCS1B03G0258800	3.37439	8.9797e-06	1.08926e-05	5.04674	4.96287	125
Chr1B	111521157	111521207	CK_peak_1004	36.8435	-	1	50	0	TraesCS1B03G0264600	4.46792	3.6045e-12	8.10945e-12	11.4432	11.091	50
Chr1B	113406916	113406966	CK_peak_1005	15.0921	-	1	50	0	TraesCS1B03G0267900	3.82264	2.48478e-05	2.8631e-05	4.60471	4.54316	50
Chr1B	114465726	114465851	CK_peak_1006	31.7639	-	1	125	0	TraesCS1B03G0269500	3.63383	1.40071e-10	2.74225e-10	9.85365	9.56189	125
Chr1B	114468174	114468399	CK_peak_1007	126.997	-	1	225	0	TraesCS1B03G0269600	5.17225	4.78891e-40	5.8892e-39	39.3198	38.2299	225
Chr1B	117495222	117495322	CK_peak_1008	31.5544	-	1	100	0	TraesCS1B03G0273400	4.42177	1.63064e-10	3.17082e-10	9.78764	9.49883	100
Chr1B	118432636	118432836	CK_peak_1009	30.7266	-	1	200	0	TraesCS1B03G0274800	3.74455	2.96265e-10	5.6282e-10	9.52832	9.24963	200
Chr1B	121495872	121495947	CK_peak_1010	57.1965	-	1	75	0	TraesCS1B03G0280500	3.88612	1.69002e-18	6.05526e-18	17.7721	17.2179	75
Chr1B	123373487	123373662	CK_peak_1011	21.3901	-	1	175	0	TraesCS1B03G0283000	3.64863	2.5441e-07	3.63862e-07	6.59447	6.43906	175
Chr1B	124728438	124728713	CK_peak_1012	42.1216	-	1	275	0	TraesCS1B03G0288200	4.73416	8.11115e-14	2.09001e-13	13.0909	12.6799	275
Chr1B	125336631	125336706	CK_peak_1013	9.9938	-	1	75	0	TraesCS1B03G0288700	3.73887	0.000973691	0.000980766	3.01158	3.00843	75
Chr1B	143805952	143806077	CK_peak_1014	28.0096	-	1	125	0	TraesCS1B03G0320200	3.28177	2.11039e-09	3.70071e-09	8.67564	8.43171	125
Chr1B	143983810	143984085	CK_peak_1015	44.1522	-	1	275	0	TraesCS1B03G0321200	3.96037	1.88989e-14	5.11518e-14	13.7236	13.2911	275
Chr1B	143996769	143996844	CK_peak_1016	26.7121	-	1	75	0	TraesCS1B03G0321300	3.66954	5.3872e-09	9.09637e-09	8.26864	8.04113	75
Chr1B	148643012	148643137	CK_peak_1017	25.5134	-	1	125	0	TraesCS1B03G0326500LC	4.32954	1.27813e-08	2.08786e-08	7.89343	7.6803	125
Chr1B	148847722	148847847	CK_peak_1018	60.2677	-	1	125	0	TraesCS1B03G0326800	3.34492	1.88042e-19	7.20466e-19	18.7257	18.1424	125
Chr1B	154739471	154739596	CK_peak_1019	16.5428	-	1	125	0	TraesCS1B03G0334900	4.02154	8.62033e-06	1.04742e-05	5.06448	4.97988	125
Chr1B	154794234	154794484	CK_peak_1020	226.449	-	1	250	0	TraesCS1B03G0335300	5.16712	1.20686e-70	6.79095e-69	69.9183	68.1681	250
Chr1B	155921179	155921379	CK_peak_1021	137.528	-	1	200	0	TraesCS1B03G0336700	5.45205	2.77238e-43	3.9808e-42	42.5571	41.4	200
Chr1B	157773824	157773874	CK_peak_1022	11.4417	-	1	50	0	TraesCS1B03G0340300	4.07028	0.000346923	0.000359513	3.45977	3.44429	50
Chr1B	157780287	157780362	CK_peak_1023	24.8167	-	1	75	0	TraesCS1B03G0340400	4.10699	2.11756e-08	3.38406e-08	7.67416	7.47056	75
Chr1B	159087068	159087193	CK_peak_1024	16.6762	-	1	125	0	TraesCS1B03G0341500	4.02787	7.82627e-06	9.54895e-06	5.10645	5.02004	125
Chr1B	161954229	161954404	CK_peak_1025	40.0234	-	1	175	0	TraesCS1B03G0344400	3.3647	3.6584e-13	8.94881e-13	12.4367	12.0482	175
Chr1B	163392310	163392410	CK_peak_1026	11.0851	-	1	100	0	TraesCS1B03G0346300	4.22552	0.000447965	0.000460312	3.34876	3.33695	100
Chr1B	165060925	165061175	CK_peak_1027	376.251	-	1	250	0	TraesCS1B03G0348500	4.34684	1.25322e-116	5.46008e-114	115.902	113.263	250
Chr1B	165719204	165719418	CK_peak_1028	95.5925	-	2	123,87	0,127	TraesCS1B03G0349200LC	4.1358	2.23081e-30	1.6741e-29	29.6515	28.7762	214
Chr1B	165941891	165942012	CK_peak_1029	23.157	-	1	121	0	TraesCS1B03G0349900LC	5.21431	7.05653e-08	1.06921e-07	7.15141	6.97094	121
Chr1B	166165377	166165477	CK_peak_1030	46.0206	-	1	100	0	TraesCS1B03G0350100	3.32893	4.94815e-15	1.40093e-14	14.3056	13.8536	100
Chr1B	166446924	166446974	CK_peak_1031	21.1124	-	1	50	0	TraesCS1B03G0350500	3.88937	3.11355e-07	4.41086e-07	6.50674	6.35548	50
Chr1B	166849643	166849793	CK_peak_1032	64.8964	-	1	150	0	TraesCS1B03G0351100	3.67868	6.89239e-21	2.91222e-20	20.1616	19.5358	150
Chr1B	169324685	169324785	CK_peak_1033	29.2317	-	1	100	0	TraesCS1B03G0356000	3.29276	8.72788e-10	1.58631e-09	9.05909	8.79961	100
Chr1B	169612855	169612930	CK_peak_1034	11.7496	-	1	75	0	TraesCS1B03G0356800	6.86005	0.000278301	0.000290414	3.55548	3.53698	75
Chr1B	173649810	173649910	CK_peak_1035	48.3377	-	1	100	0	TraesCS1B03G0360300	3.34245	9.43377e-16	2.81133e-15	15.0253	14.5511	100
Chr1B	174526843	174527118	CK_peak_1036	268.405	-	1	275	0	TraesCS1B03G0361500	5.41086	1.54554e-83	1.59243e-81	82.8109	80.7979	275
Chr1B	177929852	177930002	CK_peak_1037	70.6807	-	1	150	0	TraesCS1B03G0366100	3.80417	1.11238e-22	5.28432e-22	21.9537	21.277	150
Chr1B	179638552	179638845	CK_peak_1038	32.6424	-	2	2,98	0,195	TraesCS1B03G0368500,TraesCS1B03G0368600LC	4.15423	7.42064e-11	1.49166e-10	10.1296	9.82633	293
Chr1B	180481163	180481288	CK_peak_1039	28.074	-	1	125	0	TraesCS1B03G0369400	3.85498	2.01146e-09	3.53903e-09	8.69649	8.45112	125
Chr1B	181267208	181267308	CK_peak_1040	16.0059	-	1	100	0	TraesCS1B03G0370600	4.31911	1.27591e-05	1.51967e-05	4.89418	4.81825	100
Chr1B	184320355	184320405	CK_peak_1041	17.3054	-	1	50	0	TraesCS1B03G0374000	4.59934	4.96249e-06	6.17386e-06	5.3043	5.20944	50
Chr1B	186099717	186099817	CK_peak_1042	10.695	-	1	100	0	TraesCS1B03G0376500	6.37831	0.000591697	0.000603248	3.2279	3.2195	100
Chr1B	191669035	191669085	CK_peak_1043	16.568	-	1	50	0	TraesCS1B03G0382700	4.29591	8.46545e-06	1.02926e-05	5.07235	4.98748	50
Chr1B	194136965	194137140	CK_peak_1044	37.7036	-	1	175	0	TraesCS1B03G0385200	4.49307	1.93753e-12	4.46776e-12	11.7128	11.3499	175
Chr1B	201982585	201982760	CK_peak_1045	106.941	-	1	175	0	TraesCS1B03G0394400	5.25529	7.07644e-34	6.41931e-33	33.1502	32.1925	175
Chr1B	202535165	202535265	CK_peak_1046	19.237	-	1	100	0	TraesCS1B03G0394900	5.5477	1.22044e-06	1.61845e-06	5.91348	5.7909	100
Chr1B	210831174	210831324	CK_peak_1047	24.3898	-	1	150	0	TraesCS1B03G0401800	3.56524	2.88072e-08	4.54921e-08	7.5405	7.34206	150
Chr1B	218791011	218791411	CK_peak_1048	34.4418	-	1	400	0	TraesCS1B03G0407500LC	7.86495	2.02539e-11	4.28544e-11	10.6935	10.368	400
Chr1B	219683220	219683420	CK_peak_1049	86.9334	-	1	200	0	TraesCS1B03G0409100	4.78557	1.05096e-27	6.76777e-27	26.9784	26.1696	200
Chr1B	224255574	224255649	CK_peak_1050	10.3249	-	1	75	0	TraesCS1B03G0415700	5.2514	0.000769337	0.000779665	3.11388	3.10809	75
Chr1B	224255724	224255899	CK_peak_1051	71.7068	-	1	175	0	TraesCS1B03G0415700	3.86447	5.35488e-23	2.59474e-22	22.2713	21.5859	175
Chr1B	234258410	234258585	CK_peak_1052	43.139	-	1	175	0	TraesCS1B03G0424000	3.98711	3.90657e-14	1.03243e-13	13.4082	12.9861	175
Chr1B	237687782	237687957	CK_peak_1053	49.3227	-	1	175	0	TraesCS1B03G0427300	3.39829	4.66649e-16	1.42035e-15	15.331	14.8476	175
Chr1B	243010055	243010130	CK_peak_1054	22.9761	-	1	75	0	TraesCS1B03G0429800	3.83972	8.04088e-08	1.21197e-07	7.0947	6.91651	75
Chr1B	243010155	243010205	CK_peak_1055	48.6033	-	1	50	0	TraesCS1B03G0429800	3.87077	7.79674e-16	2.33856e-15	15.1081	14.6311	50
Chr1B	244690862	244690937	CK_peak_1056	16.4677	-	1	75	0	TraesCS1B03G0430700	4.04249	9.10168e-06	1.10336e-05	5.04088	4.95728	75
Chr1B	246836010	246836235	CK_peak_1057	72.6233	-	1	225	0	TraesCS1B03G0432100	4.13852	2.79639e-23	1.37467e-22	22.5534	21.8618	225
Chr1B	247328992	247329292	CK_peak_1058	71.9796	-	1	300	0	TraesCS1B03G0432500	4.96363	4.40867e-23	2.14778e-22	22.3557	21.668	300
Chr1B	249132885	249133285	CK_peak_1059	105.324	-	1	400	0	TraesCS1B03G0433500	4.29481	2.22998e-33	1.96902e-32	32.6517	31.7058	400
Chr1B	251941895	251942045	CK_peak_1060	33.9582	-	1	150	0	TraesCS1B03G0435100	3.7741	2.86957e-11	5.9918e-11	10.5422	10.2224	150
Chr1B	252784375	252784625	CK_peak_1061	67.1639	-	1	250	0	TraesCS1B03G0436100	4.2822	1.37318e-21	6.0484e-21	20.8623	20.2184	250
Chr1B	255513179	255513304	CK_peak_1062	14.4119	-	1	125	0	TraesCS1B03G0438100	3.01616	4.07082e-05	4.58768e-05	4.39032	4.33841	125
Chr1B	259172297	259172497	CK_peak_1063	31.0676	-	1	200	0	TraesCS1B03G0441200LC	4.10449	2.31483e-10	4.44346e-10	9.63548	9.35228	200
Chr1B	260557091	260557141	CK_peak_1064	31.1087	-	1	50	0	TraesCS1B03G0442100	3.65035	2.24862e-10	4.31854e-10	9.64808	9.36466	50
Chr1B	265865141	265865316	CK_peak_1065	26.3768	-	1	175	0	TraesCS1B03G0447400	3.41092	6.86718e-09	1.14759e-08	8.16322	7.94021	175
Chr1B	269316441	269316541	CK_peak_1066	16.2133	-	1	100	0	TraesCS1B03G0450000	5.25194	1.09581e-05	1.31618e-05	4.96026	4.88069	100
Chr1B	272278881	272278981	CK_peak_1067	16.1121	-	1	100	0	TraesCS1B03G0453800	3.91406	1.17949e-05	1.41178e-05	4.92831	4.85023	100
Chr1B	278391966	278392416	CK_peak_1068	170.666	-	1	450	0	TraesCS1B03G0462200	5.19565	1.78127e-53	4.21126e-52	52.7493	51.3756	450
Chr1B	288569660	288569885	CK_peak_1069	69.7761	-	1	225	0	TraesCS1B03G0477200	4.21664	2.13084e-22	9.89219e-22	21.6714	21.0047	225
Chr1B	291756399	291756574	CK_peak_1070	43.7785	-	1	175	0	TraesCS1B03G0480300	4.32809	2.47311e-14	6.62786e-14	13.6068	13.1786	175
Chr1B	292745245	292745295	CK_peak_1071	24.6325	-	1	50	0	TraesCS1B03G0482000	3.45409	2.41769e-08	3.84476e-08	7.6166	7.41513	50
Chr1B	295920175	295920275	CK_peak_1072	12.7226	-	1	100	0	TraesCS1B03G0486400	5.16079	0.000138148	0.000147947	3.85966	3.82989	100
Chr1B	301492107	301492357	CK_peak_1073	29.3091	-	1	250	0	TraesCS1B03G0490200LC	4.89924	8.25133e-10	1.50346e-09	9.08348	8.82291	250
Chr1B	304458265	304458440	CK_peak_1074	17.9539	-	1	175	0	TraesCS1B03G0495300	4.19089	3.09819e-06	3.93866e-06	5.50889	5.40465	175
Chr1B	305818497	305818672	CK_peak_1075	33.5962	-	1	175	0	TraesCS1B03G0497000	4.69728	3.72998e-11	7.70085e-11	10.4283	10.1135	175
Chr1B	307313416	307313566	CK_peak_1076	36.6321	-	1	150	0	TraesCS1B03G0499300	3.61425	4.19887e-12	9.38972e-12	11.3769	11.0273	150
Chr1B	307620773	307621123	CK_peak_1077	170.883	-	1	350	0	TraesCS1B03G0500650,TraesCS1B03G0500700	4.88772	1.51844e-53	3.62358e-52	52.8186	51.4409	350
Chr1B	309104469	309104644	CK_peak_1078	28.5313	-	1	175	0	TraesCS1B03G0502700	4.14146	1.44668e-09	2.57764e-09	8.83963	8.58878	175
Chr1B	309121668	309122118	CK_peak_1079	117.702	-	1	450	0	TraesCS1B03G0503200	4.56245	3.44446e-37	3.69892e-36	36.4629	35.4319	450
Chr1B	311509631	311509681	CK_peak_1080	21.8488	-	1	50	0	TraesCS1B03G0506100	3.44749	1.81789e-07	2.64766e-07	6.74043	6.57714	50
Chr1B	311509706	311509756	CK_peak_1081	23.3657	-	1	50	0	TraesCS1B03G0506100	3.42302	6.06589e-08	9.25173e-08	7.21711	7.03378	50
Chr1B	312401378	312401503	CK_peak_1082	29.7515	-	1	125	0	TraesCS1B03G0507000	4.53891	5.99678e-10	1.10641e-09	9.22208	8.95608	125
Chr1B	312539550	312539625	CK_peak_1083	14.712	-	1	75	0	TraesCS1B03G0507100LC	3.95746	3.27046e-05	3.72591e-05	4.48539	4.42877	75
Chr1B	318545858	318545983	CK_peak_1084	20.3609	-	1	125	0	TraesCS1B03G0516100	4.46745	5.3908e-07	7.42586e-07	6.26835	6.12925	125
Chr1B	319222830	319223005	CK_peak_1085	125.396	-	1	175	0	TraesCS1B03G0516400	4.49501	1.49135e-39	1.78646e-38	38.8264	37.748	175
Chr1B	321834858	321834933	CK_peak_1086	27.7974	-	1	75	0	TraesCS1B03G0518300	3.55237	2.46185e-09	4.28694e-09	8.60874	8.36785	75
Chr1B	321834983	321835033	CK_peak_1087	29.1402	-	1	50	0	TraesCS1B03G0518300	3.35125	9.33009e-10	1.69012e-09	9.03011	8.77208	50
Chr1B	323619399	323619808	CK_peak_1088	30.358	-	2	86,64	0,345	TraesCS1B03G0521200	4.86843	3.86696e-10	7.26646e-10	9.41263	9.13868	409
Chr1B	327968149	327968274	CK_peak_1089	45.1766	-	1	125	0	TraesCS1B03G0527400LC	4.55916	9.05502e-15	2.51466e-14	14.0431	13.5995	125
Chr1B	329214492	329214542	CK_peak_1090	19.2521	-	1	50	0	TraesCS1B03G0530000	5.4209	1.2074e-06	1.60157e-06	5.91815	5.79545	50
Chr1B	333056829	333056929	CK_peak_1091	25.2041	-	1	100	0	TraesCS1B03G0535300LC	4.03905	1.5999e-08	2.58715e-08	7.79591	7.58718	100
Chr1B	333842934	333843034	CK_peak_1092	20.9746	-	1	100	0	TraesCS1B03G0537300	3.47695	3.44531e-07	4.8529e-07	6.46277	6.314	100
Chr1B	334110289	334110339	CK_peak_1093	15.2111	-	1	50	0	TraesCS1B03G0537900	4.11062	2.27708e-05	2.63634e-05	4.64262	4.579	50
Chr1B	339069014	339069164	CK_peak_1094	32.0023	-	1	150	0	TraesCS1B03G0549000	3.84476	1.1793e-10	2.3246e-10	9.92838	9.63365	150
Chr1B	339553792	339553966	CK_peak_1095	28.7191	-	2	64,11	0,163	TraesCS1B03G0549100	3.47342	1.26394e-09	2.26297e-09	8.89828	8.64532	174
Chr1B	340536946	340537246	CK_peak_1096	155.179	-	1	300	0	TraesCS1B03G0550600	4.39328	1.01852e-48	1.93417e-47	47.992	46.7135	300
Chr1B	340897503	340897628	CK_peak_1097	19.6385	-	1	125	0	TraesCS1B03G0551000LC	8.88001	9.123e-07	1.22527e-06	6.03986	5.91177	125
Chr1B	351031375	351031450	CK_peak_1098	13.8699	-	1	75	0	TraesCS1B03G0567100	3.76672	6.02646e-05	6.67957e-05	4.21994	4.17525	75
Chr1B	351491820	351492045	CK_peak_1099	93.2318	-	1	225	0	TraesCS1B03G0567600	4.9661	1.18925e-29	8.59878e-29	28.9247	28.0656	225
Chr1B	352345864	352346039	CK_peak_1100	55.0434	-	1	175	0	TraesCS1B03G0568700,TraesCS1B03G0568800	4.85582	7.85422e-18	2.69325e-17	17.1049	16.5697	175
Chr1B	355708499	355708549	CK_peak_1101	12.2753	-	1	50	0	TraesCS1B03G0574200	5.90226	0.000190741	0.000201722	3.71956	3.69525	50
Chr1B	355757314	355757464	CK_peak_1102	11.7018	-	1	150	0	TraesCS1B03G0574600	6.80787	0.000287844	0.000300187	3.54084	3.52261	150
Chr1B	356542787	356542912	CK_peak_1103	14.1909	-	1	125	0	TraesCS1B03G0575500,TraesCS1B03G0575600	7.65816	4.77243e-05	5.34715e-05	4.32126	4.27188	125
Chr1B	358525200	358525325	CK_peak_1104	102.858	-	1	125	0	TraesCS1B03G0576800	4.1623	1.28607e-32	1.0883e-31	31.8907	30.9632	125
Chr1B	360783595	360783820	CK_peak_1105	49.0537	-	1	225	0	TraesCS1B03G0579400	4.38228	5.65096e-16	1.71145e-15	15.2479	14.7666	225
Chr1B	363340954	363341054	CK_peak_1106	25.3542	-	1	100	0	TraesCS1B03G0583400	3.77238	1.43563e-08	2.3314e-08	7.84296	7.63238	100
Chr1B	363561510	363561585	CK_peak_1107	12.0156	-	1	75	0	TraesCS1B03G0584000,TraesCS1B03G0584200LC	6.93955	0.000229935	0.000241513	3.63839	3.61706	75
Chr1B	363770319	363770494	CK_peak_1108	40.6187	-	1	175	0	TraesCS1B03G0584800	4.58917	2.38647e-13	5.92305e-13	12.6222	12.2275	175
Chr1B	364148847	364149072	CK_peak_1109	80.2913	-	1	225	0	TraesCS1B03G0585600	4.1749	1.19325e-25	6.75926e-25	24.9233	24.1701	225
Chr1B	369735449	369735599	CK_peak_1110	27.5314	-	1	150	0	TraesCS1B03G0591300LC	4.72189	2.98522e-09	5.15475e-09	8.52502	8.28779	150
Chr1B	371791812	371791987	CK_peak_1111	80.1202	-	1	175	0	TraesCS1B03G0593700	3.50643	1.35102e-25	7.61051e-25	24.8693	24.1186	175
Chr1B	375656597	375656922	CK_peak_1112	125.859	-	1	325	0	TraesCS1B03G0598300	4.73053	1.07178e-39	1.29608e-38	38.9699	37.8874	325
Chr1B	376790543	376790743	CK_peak_1113	42.8941	-	1	200	0	TraesCS1B03G0599200	3.97209	4.66226e-14	1.22345e-13	13.3314	12.9124	200
Chr1B	380084036	380084086	CK_peak_1114	37.9297	-	1	50	0	TraesCS1B03G0603900LC	3.48856	1.64915e-12	3.81955e-12	11.7827	11.418	50
Chr1B	380412191	380412416	CK_peak_1115	52.1452	-	1	225	0	TraesCS1B03G0605100	4.517	6.19121e-17	2.00786e-16	16.2082	15.6973	225
Chr1B	380930220	380930320	CK_peak_1116	14.548	-	1	100	0	TraesCS1B03G0605700	3.81091	3.68495e-05	4.17475e-05	4.43357	4.37937	100
Chr1B	381887653	381887828	CK_peak_1117	57.8362	-	1	175	0	TraesCS1B03G0606600	4.32784	1.06795e-18	3.88668e-18	17.9714	17.4104	175
Chr1B	382678648	382678873	CK_peak_1118	47.6886	-	1	225	0	TraesCS1B03G0607600	4.10804	1.49989e-15	4.40859e-15	14.8239	14.3557	225
Chr1B	384023974	384024149	CK_peak_1119	9.86591	-	1	175	0	TraesCS1B03G0609200	4.99466	0.00106605	0.00107168	2.97222	2.96994	175
Chr1B	385681363	385681538	CK_peak_1120	29.8636	-	1	175	0	TraesCS1B03G0611500	4.29928	5.53233e-10	1.02369e-09	9.25709	8.98983	175
Chr1B	385684544	385684594	CK_peak_1121	15.6402	-	1	50	0	TraesCS1B03G0611500	8.01496	1.66504e-05	1.95806e-05	4.77858	4.70817	50
Chr1B	386485147	386485994	CK_peak_1122	15.0014	-	2	109,16	0,831	TraesCS1B03G0612100LC	4.0571	2.65254e-05	3.04881e-05	4.57634	4.51587	847
Chr1B	388260207	388260432	CK_peak_1123	80.8692	-	1	225	0	TraesCS1B03G0614800,TraesCS1B03G0614900LC	6.06181	7.87865e-26	4.52852e-25	25.1035	24.344	225
Chr1B	389835538	389835763	CK_peak_1124	66.0516	-	1	225	0	TraesCS1B03G0616500	4.2834	3.02868e-21	1.3076e-20	20.5187	19.8835	225
Chr1B	390329037	390329087	CK_peak_1125	37.7036	-	1	50	0	TraesCS1B03G0617500	3.55972	1.93742e-12	4.46776e-12	11.7128	11.3499	50
Chr1B	390331610	390331660	CK_peak_1126	23.3188	-	1	50	0	TraesCS1B03G0617500	3.39806	6.27586e-08	9.55764e-08	7.20233	7.01965	50
Chr1B	391242076	391242301	CK_peak_1127	185.931	-	1	225	0	TraesCS1B03G0618700	4.56621	3.6823e-58	1.06955e-56	57.4339	55.9708	225
Chr1B	391326933	391326983	CK_peak_1128	12.0016	-	1	50	0	TraesCS1B03G0618900,TraesCS1B03G0619000LC	3.73683	0.000232368	0.000243877	3.63382	3.61283	50
Chr1B	393316022	393316072	CK_peak_1129	10.9684	-	1	50	0	TraesCS1B03G0621300	6.45355	0.000486671	0.000499109	3.31276	3.3018	50
Chr1B	395083725	395083800	CK_peak_1130	23.2053	-	1	75	0	TraesCS1B03G0623800	5.00583	6.80908e-08	1.03397e-07	7.16691	6.98549	75
Chr1B	399091947	399092122	CK_peak_1131	41.4202	-	1	175	0	TraesCS1B03G0630700	3.63627	1.34277e-13	3.39848e-13	12.872	12.4687	175
Chr1B	403824037	403824187	CK_peak_1132	26.7979	-	1	150	0	TraesCS1B03G0637900,TraesCS1B03G0638000	4.72761	5.06606e-09	8.57122e-09	8.29533	8.06696	150
Chr1B	408079650	408079825	CK_peak_1133	105.905	-	1	175	0	TraesCS1B03G0646900	3.41306	1.48152e-33	1.31653e-32	32.8293	31.8806	175
Chr1B	408115314	408115739	CK_peak_1134	90.4264	-	1	425	0	TraesCS1B03G0647000	4.36544	8.73923e-29	6.01103e-28	28.0585	27.2211	425
Chr1B	409052080	409069829	CK_peak_1135	34.2999	-	2	9,91	0,17658	TraesCS1B03G0648500	3.57626	2.24493e-11	4.7283e-11	10.6488	10.3253	17749
Chr1B	412284898	412285123	CK_peak_1136	71.3638	-	1	225	0	TraesCS1B03G0652900	4.02489	6.8333e-23	3.29125e-22	22.1654	21.4826	225
Chr1B	413258198	413258273	CK_peak_1137	21.2003	-	1	75	0	TraesCS1B03G0654200	4.25039	2.92219e-07	4.15018e-07	6.53429	6.38193	75
Chr1B	413552845	413553020	CK_peak_1138	87.1168	-	1	175	0	TraesCS1B03G0654700LC	4.50906	9.21944e-28	5.95961e-27	27.0353	26.2248	175
Chr1B	414605415	414605540	CK_peak_1139	14.991	-	1	125	0	TraesCS1B03G0655900	3.36197	2.67257e-05	3.07091e-05	4.57307	4.51273	125
Chr1B	415558106	415558256	CK_peak_1140	28.5881	-	1	150	0	TraesCS1B03G0657400	4.02086	1.38881e-09	2.47811e-09	8.85736	8.60588	150
Chr1B	415621021	415621096	CK_peak_1141	20.1623	-	1	75	0	TraesCS1B03G0657900	4.3752	6.22942e-07	8.52179e-07	6.20555	6.06947	75
Chr1B	417090984	417091134	CK_peak_1142	16.9697	-	1	150	0	TraesCS1B03G0659600	4.7147	6.32697e-06	7.79133e-06	5.1988	5.10839	150
Chr1B	420082060	420082135	CK_peak_1143	79.4963	-	1	75	0	TraesCS1B03G0662800	3.27628	2.10961e-25	1.17278e-24	24.6758	23.9308	75
Chr1B	420084548	420084648	CK_peak_1144	38.3767	-	1	100	0	TraesCS1B03G0662800	4.00625	1.19806e-12	2.80203e-12	11.9215	11.5525	100
Chr1B	429091676	429091851	CK_peak_1145	16.7349	-	1	175	0	TraesCS1B03G0676400,TraesCS1B03G0676500LC	8.26431	7.50078e-06	9.16869e-06	5.12489	5.03769	175
Chr1B	429536561	429536611	CK_peak_1146	20.7535	-	1	50	0	TraesCS1B03G0677200	7.62143	4.04575e-07	5.65686e-07	6.393	6.24742	50
Chr1B	429842881	429843006	CK_peak_1147	31.5717	-	1	125	0	TraesCS1B03G0677900	5.18646	1.61062e-10	3.1331e-10	9.79301	9.50403	125
Chr1B	432379070	432379245	CK_peak_1148	33.7537	-	1	175	0	TraesCS1B03G0681000	3.92232	3.32735e-11	6.90418e-11	10.4779	10.1609	175
Chr1B	432841835	432841985	CK_peak_1149	30.8494	-	1	150	0	TraesCS1B03G0682100LC	3.79775	2.70934e-10	5.16886e-10	9.56714	9.2866	150
Chr1B	434591680	434591880	CK_peak_1150	190.685	-	1	200	0	TraesCS1B03G0686700	4.92506	1.26869e-59	3.96441e-58	58.8966	57.4018	200
Chr1B	435631602	435631702	CK_peak_1151	31.8208	-	1	100	0	TraesCS1B03G0688100LC,TraesCS1B03G0688200	4.63692	1.34444e-10	2.63616e-10	9.87146	9.57903	100
Chr1B	439023276	439023501	CK_peak_1152	71.1539	-	1	225	0	TraesCS1B03G0692800	4.03982	7.92823e-23	3.8066e-22	22.1008	21.4195	225
Chr1B	445047265	445047390	CK_peak_1153	11.3907	-	1	125	0	TraesCS1B03G0701700LC	4.73773	0.000359878	0.000372431	3.44385	3.42895	125
Chr1B	447369518	447369643	CK_peak_1154	27.8988	-	1	125	0	TraesCS1B03G0705900	3.36499	2.28801e-09	3.99609e-09	8.64054	8.39836	125
Chr1B	447633179	447633379	CK_peak_1155	78.5064	-	1	200	0	TraesCS1B03G0706300	4.07528	4.26019e-25	2.32928e-24	24.3706	23.6328	200
Chr1B	448044883	448045083	CK_peak_1156	71.4994	-	1	200	0	TraesCS1B03G0707100	3.99971	6.20648e-23	2.99597e-22	22.2072	21.5235	200
Chr1B	448085847	448086122	CK_peak_1157	24.8941	-	1	275	0	TraesCS1B03G0707300	4.16133	2.00256e-08	3.20733e-08	7.69842	7.49386	275
Chr1B	448145281	448145381	CK_peak_1158	15.6386	-	1	100	0	TraesCS1B03G0707500LC,TraesCS1B03G0707600	8.01067	1.6672e-05	1.9603e-05	4.77801	4.70768	100
Chr1B	448175479	448175529	CK_peak_1159	12.0327	-	1	50	0	TraesCS1B03G0708000	5.83058	0.000227135	0.00023867	3.64372	3.6222	50
Chr1B	448181953	448182078	CK_peak_1160	60.9606	-	1	125	0	TraesCS1B03G0708200LC	3.68212	1.1463e-19	4.45689e-19	18.9407	18.351	125
Chr1B	450654770	450654970	CK_peak_1161	60.5764	-	1	200	0	TraesCS1B03G0711900,TraesCS1B03G0712000	4.18885	1.50946e-19	5.81697e-19	18.8212	18.2353	200
Chr1B	450657431	450657481	CK_peak_1162	9.72082	-	1	50	0	TraesCS1B03G0712000	1.1999	0.00117985	0.00118506	2.92817	2.92626	50
Chr1B	451392945	451393070	CK_peak_1163	25.2299	-	1	125	0	TraesCS1B03G0714000	3.97263	1.57038e-08	2.54131e-08	7.80399	7.59494	125
Chr1B	453276991	453277091	CK_peak_1164	14.3853	-	1	100	0	TraesCS1B03G0716500	5.6089	4.14845e-05	4.6731e-05	4.38211	4.3304	100
Chr1B	457667136	457667211	CK_peak_1165	19.5609	-	1	75	0	TraesCS1B03G0723100	4.95179	9.64702e-07	1.29291e-06	6.01561	5.88843	75
Chr1B	458495888	458496063	CK_peak_1166	50.4073	-	1	175	0	TraesCS1B03G0724700	3.48748	2.14587e-16	6.69718e-16	15.6684	15.1741	175
Chr1B	458499121	458499171	CK_peak_1167	12.1158	-	1	50	0	TraesCS1B03G0724700	5.08543	0.000214005	0.000225308	3.66958	3.64722	50
Chr1B	462162614	462162964	CK_peak_1168	232.216	-	1	350	0	TraesCS1B03G0729700	5.55271	2.07781e-72	1.24742e-70	71.6824	69.904	350
Chr1B	463352973	463353123	CK_peak_1169	28.118	-	1	150	0	TraesCS1B03G0731200	3.68043	1.94944e-09	3.43274e-09	8.71009	8.46436	150
Chr1B	463353173	463353348	CK_peak_1170	47.0461	-	1	175	0	TraesCS1B03G0731200	3.71865	2.37702e-15	6.88194e-15	14.624	14.1623	175
Chr1B	467173037	467173312	CK_peak_1171	185.785	-	1	275	0	TraesCS1B03G0735900	5.4653	4.09624e-58	1.18302e-56	57.3876	55.927	275
Chr1B	470362583	470362733	CK_peak_1172	16.4214	-	1	150	0	TraesCS1B03G0739000	3.67118	9.41606e-06	1.13939e-05	5.02613	4.94333	150
Chr1B	470587640	470587740	CK_peak_1173	44.3688	-	1	100	0	TraesCS1B03G0739200,TraesCS1B03G0739300LC	3.2575	1.61836e-14	4.40215e-14	13.7909	13.3563	100
Chr1B	471961732	471962032	CK_peak_1174	166.263	-	1	300	0	TraesCS1B03G0741800,TraesCS1B03G0741900	4.22556	4.07916e-52	8.91162e-51	51.3894	50.05	300
Chr1B	471964383	471964433	CK_peak_1175	13.2908	-	1	50	0	TraesCS1B03G0741900	3.9314	9.16369e-05	9.97837e-05	4.03793	4.00094	50
Chr1B	476623254	476623322	CK_peak_1176	19.7637	-	1	68	0	TraesCS1B03G0748200,TraesCS1B03G0748300LC	5.72331	8.32253e-07	1.12342e-06	6.07974	5.94946	68
Chr1B	482533673	482533773	CK_peak_1177	38.6017	-	1	100	0	TraesCS1B03G0756500	6.55102	1.01971e-12	2.39741e-12	11.9915	11.6203	100
Chr1B	484447798	484447973	CK_peak_1178	17.8443	-	1	175	0	TraesCS1B03G0759600	4.12725	3.35205e-06	4.24936e-06	5.47469	5.37168	175
Chr1B	484791305	484791380	CK_peak_1179	14.4805	-	1	75	0	TraesCS1B03G0760500	5.62829	3.87286e-05	4.37461e-05	4.41197	4.35906	75
Chr1B	490625192	490625342	CK_peak_1180	11.8693	-	1	150	0	TraesCS1B03G0769100	5.62558	0.000255481	0.000267295	3.59264	3.57301	150
Chr1B	493113953	493114078	CK_peak_1181	17.4991	-	1	125	0	TraesCS1B03G0773400	4.96927	4.30876e-06	5.39798e-06	5.36565	5.26777	125
Chr1B	493812364	493812489	CK_peak_1182	22.3487	-	1	125	0	TraesCS1B03G0775600LC	4.4389	1.26622e-07	1.87225e-07	6.89749	6.72764	125
Chr1B	494351195	494351270	CK_peak_1183	16.4907	-	1	75	0	TraesCS1B03G0776600	3.94041	8.95125e-06	1.0859e-05	5.04812	4.96421	75
Chr1B	502196823	502197073	CK_peak_1184	57.3913	-	1	250	0	TraesCS1B03G0794000	3.68204	1.4676e-18	5.29066e-18	17.8334	17.2765	250
Chr1B	505281466	505281591	CK_peak_1185	38.3787	-	1	125	0	TraesCS1B03G0799200	4.26775	1.19621e-12	2.79812e-12	11.9222	11.5531	125
Chr1B	505628999	505629049	CK_peak_1186	11.6592	-	1	50	0	TraesCS1B03G0800600	5.69578	0.000296762	0.000309192	3.52759	3.50977	50
Chr1B	507436107	507436232	CK_peak_1187	38.4489	-	1	125	0	TraesCS1B03G0803700	3.76239	1.1366e-12	2.66523e-12	11.9444	11.5743	125
Chr1B	509714159	509714259	CK_peak_1188	10.9818	-	1	100	0	TraesCS1B03G0807800	4.77742	0.000482022	0.000494474	3.31693	3.30586	100
Chr1B	510144663	510144788	CK_peak_1189	58.2965	-	1	125	0	TraesCS1B03G0808400LC	5.71624	7.70113e-19	2.82498e-18	18.1134	17.549	125
Chr1B	511112996	511113171	CK_peak_1190	46.221	-	1	175	0	TraesCS1B03G0809400	4.17406	4.29057e-15	1.21929e-14	14.3675	13.9139	175
Chr1B	511699870	511699945	CK_peak_1191	20.3121	-	1	75	0	TraesCS1B03G0810500	3.92737	5.5874e-07	7.68142e-07	6.25279	6.11456	75
Chr1B	513889613	513889788	CK_peak_1192	48.1084	-	1	175	0	TraesCS1B03G0812300	4.16314	1.11146e-15	3.29549e-15	14.9541	14.4821	175
Chr1B	515041353	515041603	CK_peak_1193	19.2643	-	1	250	0	TraesCS1B03G0814700	4.47564	1.19658e-06	1.58805e-06	5.92206	5.79914	250
Chr1B	518702401	518702626	CK_peak_1194	24.3542	-	1	225	0	TraesCS1B03G0821000	4.50257	2.95562e-08	4.66277e-08	7.52935	7.33136	225
Chr1B	522960946	522961146	CK_peak_1195	101.214	-	1	200	0	TraesCS1B03G0825600	4.89964	4.11408e-32	3.4003e-31	31.3857	30.4685	200
Chr1B	534475218	534475418	CK_peak_1196	53.4192	-	1	200	0	TraesCS1B03G0842600	5.26681	2.48992e-17	8.30281e-17	16.6038	16.0808	200
Chr1B	537291783	537292008	CK_peak_1197	39.6419	-	1	225	0	TraesCS1B03G0848200	4.484	4.81761e-13	1.16572e-12	12.3172	11.9334	225
Chr1B	541269665	541269890	CK_peak_1198	73.2675	-	1	225	0	TraesCS1B03G0856300,TraesCS1B03G0856400	4.6757	1.76854e-23	8.79599e-23	22.7524	22.0557	225
Chr1B	541275306	541276110	CK_peak_1199	16.1321	-	2	12,38	0,766	TraesCS1B03G0856500	3.96424	1.16217e-05	1.39235e-05	4.93473	4.85625	804
Chr1B	543297798	543297973	CK_peak_1200	32.503	-	1	175	0	TraesCS1B03G0860000	3.69709	8.20544e-11	1.64292e-10	10.0859	9.78438	175
Chr1B	544056677	544056827	CK_peak_1201	12.8724	-	1	150	0	TraesCS1B03G0861000LC	7.23636	0.000123966	0.000133359	3.9067	3.87498	150
Chr1B	546135704	546136029	CK_peak_1202	246.159	-	1	325	0	TraesCS1B03G0864600	4.97901	1.10103e-76	7.91965e-75	75.9582	74.1013	325
Chr1B	547320361	547320411	CK_peak_1203	15.097	-	1	50	0	TraesCS1B03G0868300	7.95569	2.47533e-05	2.8533e-05	4.60637	4.54465	50
Chr1B	549194399	549194449	CK_peak_1204	26.2169	-	1	50	0	TraesCS1B03G0871200	10.0489	7.7022e-09	1.28208e-08	8.11338	7.89209	50
Chr1B	550089664	550089714	CK_peak_1205	11.9267	-	1	50	0	TraesCS1B03G0874400	5.63668	0.000245267	0.000256873	3.61036	3.59028	50
Chr1B	550112736	550112786	CK_peak_1206	20.4329	-	1	50	0	TraesCS1B03G0874800	3.56962	5.11606e-07	7.06464e-07	6.29106	6.15091	50
Chr1B	550112836	550113011	CK_peak_1207	148.423	-	1	175	0	TraesCS1B03G0874800	3.55479	1.22684e-46	2.09029e-45	45.9112	44.6798	175
Chr1B	550115395	550115470	CK_peak_1208	12.198	-	1	75	0	TraesCS1B03G0874800	4.1624	0.000201707	0.000212831	3.69528	3.67196	75
Chr1B	553268811	553268886	CK_peak_1209	21.5591	-	1	75	0	TraesCS1B03G0882400	4.29699	2.24946e-07	3.23635e-07	6.64792	6.48994	75
Chr1B	554613249	554613399	CK_peak_1210	16.0441	-	1	150	0	TraesCS1B03G0885000LC	8.10942	1.23986e-05	1.47997e-05	4.90663	4.82975	150
Chr1B	557718978	557719078	CK_peak_1211	76.61	-	1	100	0	TraesCS1B03G0892400	4.41465	1.63777e-24	8.67164e-24	23.7857	23.0619	100
Chr1B	557881783	557881958	CK_peak_1212	32.5106	-	1	175	0	TraesCS1B03G0892900	3.73887	8.16043e-11	1.63434e-10	10.0883	9.78666	175
Chr1B	557935843	557935893	CK_peak_1213	9.90768	-	1	50	0	TraesCS1B03G0893400	4.87204	0.00103522	0.0010411	2.98497	2.98251	50
Chr1B	559175556	559175656	CK_peak_1214	9.98554	-	1	100	0	TraesCS1B03G0896200	5.89203	0.000979543	0.0009864	3.00898	3.00595	100
Chr1B	560328740	560328815	CK_peak_1215	16.5802	-	1	75	0	TraesCS1B03G0897800	4.1515	8.39074e-06	1.02058e-05	5.0762	4.99115	75
Chr1B	562324173	562324223	CK_peak_1216	74.2553	-	1	50	0	TraesCS1B03G0904500	3.48735	8.74631e-24	4.4354e-23	23.0582	22.3531	50
Chr1B	562327618	562327718	CK_peak_1217	29.4501	-	1	100	0	TraesCS1B03G0904500	4.27719	7.45771e-10	1.36342e-09	9.12739	8.86537	100
Chr1B	568338829	568339104	CK_peak_1218	75.2329	-	1	275	0	TraesCS1B03G0916800	4.53978	4.36023e-24	2.25234e-23	23.3605	22.6474	275
Chr1B	568398559	568398659	CK_peak_1219	45.3207	-	1	100	0	TraesCS1B03G0917100	3.43932	8.17193e-15	2.27564e-14	14.0877	13.6429	100
Chr1B	569559490	569559790	CK_peak_1220	129.349	-	1	300	0	TraesCS1B03G0920200	5.63479	9.07093e-41	1.15365e-39	40.0423	38.9379	300
Chr1B	570928744	570928944	CK_peak_1221	61.5059	-	1	200	0	TraesCS1B03G0924400,TraesCS1B03G0924500	3.96298	7.76263e-20	3.05398e-19	19.11	18.5151	200
Chr1B	573636512	573636712	CK_peak_1222	117.015	-	1	200	0	TraesCS1B03G0931100	5.38442	5.62427e-37	5.95587e-36	36.2499	35.2251	200
Chr1B	575395598	575395748	CK_peak_1223	44.9383	-	1	150	0	TraesCS1B03G0934900	3.2997	1.07499e-14	2.96643e-14	13.9686	13.5278	150
Chr1B	575788998	575789123	CK_peak_1224	15.1036	-	1	125	0	TraesCS1B03G0935300	8.00045	2.46348e-05	2.84029e-05	4.60845	4.54664	125
Chr1B	575795119	575795219	CK_peak_1225	41.0084	-	1	100	0	TraesCS1B03G0935500	3.84766	1.8082e-13	4.52095e-13	12.7428	12.3448	100
Chr1B	577994278	577994453	CK_peak_1226	21.3097	-	1	175	0	TraesCS1B03G0941300	5.30782	2.69879e-07	3.84723e-07	6.56883	6.41485	175
Chr1B	579109003	579109178	CK_peak_1227	59.4701	-	1	175	0	TraesCS1B03G0944600	4.28273	3.32441e-19	1.25232e-18	18.4783	17.9023	175
Chr1B	580183939	580184214	CK_peak_1228	52.3711	-	1	275	0	TraesCS1B03G0946900	4.41118	5.26786e-17	1.71681e-16	16.2784	15.7653	275
Chr1B	580671506	580671606	CK_peak_1229	23.5522	-	1	100	0	TraesCS1B03G0947900	4.08546	5.29951e-08	8.13001e-08	7.27576	7.08991	100
Chr1B	581076503	581076628	CK_peak_1230	14.8149	-	1	125	0	TraesCS1B03G0948600	3.81338	3.03588e-05	3.46942e-05	4.51772	4.45974	125
Chr1B	583222214	583222425	CK_peak_1231	122.642	-	1	211	0	TraesCS1B03G0951200,TraesCS1B03G0951300LC	5.34862	1.04418e-38	1.20535e-37	37.9812	36.9189	211
Chr1B	588253604	588253879	CK_peak_1232	54.7154	-	1	275	0	TraesCS1B03G0959800	3.99724	9.91065e-18	3.38093e-17	17.0039	16.471	275
Chr1B	588734005	588734155	CK_peak_1233	20.6616	-	1	150	0	TraesCS1B03G0960800	3.66053	4.32628e-07	6.02902e-07	6.36389	6.21975	150
Chr1B	589949897	589949972	CK_peak_1234	12.1969	-	1	75	0	TraesCS1B03G0962400	4.51786	0.000201917	0.000212993	3.69483	3.67163	75
Chr1B	590122097	590122322	CK_peak_1235	44.2025	-	1	225	0	TraesCS1B03G0962600	4.77638	1.82188e-14	4.93988e-14	13.7395	13.3063	225
Chr1B	590475944	590476369	CK_peak_1236	119.602	-	1	425	0	TraesCS1B03G0963300	4.34804	9.01918e-38	9.91589e-37	37.0448	36.0037	425
Chr1B	590721899	590721949	CK_peak_1237	21.1045	-	1	50	0	TraesCS1B03G0966900	4.52829	3.13243e-07	4.43514e-07	6.50412	6.35309	50
Chr1B	590721974	590722199	CK_peak_1238	40.7785	-	1	225	0	TraesCS1B03G0966900	4.10558	2.12964e-13	5.30202e-13	12.6717	12.2756	225
Chr1B	591135156	591135406	CK_peak_1239	66.908	-	1	250	0	TraesCS1B03G0968500	5.01226	1.65105e-21	7.22226e-21	20.7822	20.1413	250
Chr1B	598072504	598072754	CK_peak_1240	71.1047	-	1	250	0	TraesCS1B03G0986900	5.2231	8.21094e-23	3.93862e-22	22.0856	21.4047	250
Chr1B	599739719	599739894	CK_peak_1241	31.8968	-	1	175	0	TraesCS1B03G0990600	3.61038	1.27339e-10	2.50102e-10	9.89504	9.60188	175
Chr1B	602402404	602402579	CK_peak_1242	19.7922	-	1	175	0	TraesCS1B03G0996600	3.77902	8.14817e-07	1.10142e-06	6.08894	5.95805	175
Chr1B	603554997	603555172	CK_peak_1243	20.2074	-	1	175	0	TraesCS1B03G1000000	4.39823	6.03172e-07	8.2595e-07	6.21956	6.08305	175
Chr1B	604516033	604516258	CK_peak_1244	36.9354	-	1	225	0	TraesCS1B03G1001600	4.13323	3.37569e-12	7.60914e-12	11.4716	11.1187	225
Chr1B	611462369	611462569	CK_peak_1245	40.8208	-	1	200	0	TraesCS1B03G1018400	4.09596	2.06614e-13	5.14898e-13	12.6848	12.2883	200
Chr1B	611470489	611470539	CK_peak_1246	46.2842	-	1	50	0	TraesCS1B03G1018500	3.88893	4.10412e-15	1.16695e-14	14.3868	13.9329	50
Chr1B	612143606	612143781	CK_peak_1247	80.012	-	1	175	0	TraesCS1B03G1019800	3.72058	1.46056e-25	8.20336e-25	24.8355	24.086	175
Chr1B	613446226	613446401	CK_peak_1248	66.0795	-	1	175	0	TraesCS1B03G1023100	3.84394	2.96995e-21	1.2826e-20	20.5273	19.8919	175
Chr1B	615656891	615657016	CK_peak_1249	24.4371	-	1	125	0	TraesCS1B03G1027100	4.28961	2.78335e-08	4.40238e-08	7.55543	7.35631	125
Chr1B	617286647	617286822	CK_peak_1250	24.0028	-	1	175	0	TraesCS1B03G1029600	6.2516	3.82038e-08	5.94883e-08	7.41789	7.22557	175
Chr1B	618634195	618634641	CK_peak_1251	131.864	-	1	446	0	TraesCS1B03G1031700,TraesCS1B03G1031800LC	7.54586	1.52351e-41	2.01842e-40	40.8172	39.695	446
Chr1B	619032541	619032741	CK_peak_1252	27.6518	-	1	200	0	TraesCS1B03G1032500	4.43847	2.73786e-09	4.74213e-09	8.56259	8.32403	200
Chr1B	619566630	619566730	CK_peak_1253	27.223	-	1	100	0	TraesCS1B03G1033500LC	7.1672	3.72903e-09	6.38347e-09	8.4284	8.19494	100
Chr1B	620326874	620326924	CK_peak_1254	26.4833	-	1	50	0	TraesCS1B03G1035500	3.66848	6.35558e-09	1.06595e-08	8.19685	7.97226	50
Chr1B	620505944	620506019	CK_peak_1255	59.4716	-	1	75	0	TraesCS1B03G1036500	3.44819	3.32004e-19	1.25098e-18	18.4789	17.9027	75
Chr1B	620509620	620509670	CK_peak_1256	31.5482	-	1	50	0	TraesCS1B03G1036600	3.37958	1.6379e-10	3.18455e-10	9.78571	9.49695	50
Chr1B	621038257	621038307	CK_peak_1257	18.2097	-	1	50	0	TraesCS1B03G1037200LC	4.23341	2.57283e-06	3.29857e-06	5.58959	5.48167	50
Chr1B	622204814	622205014	CK_peak_1258	32.1644	-	1	200	0	TraesCS1B03G1040700	4.63265	1.04691e-10	2.07761e-10	9.98009	9.68244	200
Chr1B	623686831	623686956	CK_peak_1259	83.5205	-	1	125	0	TraesCS1B03G1043800	3.58447	1.1841e-26	7.20811e-26	25.9266	25.1422	125
Chr1B	625762024	625762085	CK_peak_1260	27.2283	-	1	61	0	TraesCS1B03G1045900	6.5167	3.71491e-09	6.36001e-09	8.43005	8.19654	61
Chr1B	629004149	629004199	CK_peak_1261	27.9753	-	1	50	0	TraesCS1B03G1052700	3.3566	2.16279e-09	3.78955e-09	8.66499	8.42141	50
Chr1B	629518989	629519214	CK_peak_1262	104.82	-	1	225	0	TraesCS1B03G1053800	4.09794	3.19587e-33	2.79277e-32	32.4954	31.554	225
Chr1B	629611976	629612226	CK_peak_1263	322.193	-	1	250	0	TraesCS1B03G1054000	4.0761	5.03442e-100	1.0236e-97	99.2981	96.9899	250
Chr1B	630724151	630724276	CK_peak_1264	9.24627	-	1	125	0	TraesCS1B03G1056500	3.94515	0.00164392	0.00164662	2.78412	2.78341	125
Chr1B	631757327	631757577	CK_peak_1265	31.9513	-	1	250	0	TraesCS1B03G1059900,TraesCS1B03G1060000	6.91338	1.22378e-10	2.40824e-10	9.9123	9.6183	250
Chr1B	634988921	634988996	CK_peak_1266	104.168	-	1	75	0	TraesCS1B03G1070600	4.13471	5.10589e-33	4.38893e-32	32.2919	31.3576	75
Chr1B	635092520	635092818	CK_peak_1267	61.4422	-	2	49151	0,147	TraesCS1B03G1071300	4.07865	8.11974e-20	3.19201e-19	19.0905	18.4959	298
Chr1B	637130193	637130268	CK_peak_1268	30.4024	-	1	75	0	TraesCS1B03G1077000,TraesCS1B03G1077100	4.01114	3.74765e-10	7.04661e-10	9.42624	9.15202	75
Chr1B	638288531	638288731	CK_peak_1269	42.995	-	1	200	0	TraesCS1B03G1080900	4.38386	4.3368e-14	1.1408e-13	13.3628	12.9428	200
Chr1B	640389826	640389976	CK_peak_1270	46.5941	-	1	150	0	TraesCS1B03G1087200	3.44958	3.28994e-15	9.4142e-15	14.4828	14.0262	150
Chr1B	647560384	647560434	CK_peak_1271	13.8776	-	1	50	0	TraesCS1B03G1118800,TraesCS1B03G1119000	6.41247	5.99077e-05	6.64387e-05	4.22252	4.17758	50
Chr1B	647560459	647560759	CK_peak_1272	104.958	-	1	300	0	TraesCS1B03G1118800,TraesCS1B03G1119000	4.37135	2.89862e-33	2.53884e-32	32.5378	31.5954	300
Chr1B	647960538	647960763	CK_peak_1273	54.8034	-	1	225	0	TraesCS1B03G1119600	5.22663	9.31335e-18	3.18072e-17	17.0309	16.4975	225
Chr1B	648245683	648245808	CK_peak_1274	12.948	-	1	125	0	TraesCS1B03G1120700	4.05173	0.000117474	0.000126554	3.93006	3.89773	125
Chr1B	650473489	650473714	CK_peak_1275	49.2401	-	1	225	0	TraesCS1B03G1131700	3.92092	4.94911e-16	1.50397e-15	15.3055	14.8228	225
Chr1B	650625604	650625729	CK_peak_1276	116.243	-	1	125	0	TraesCS1B03G1132300,TraesCS1B03G1132400LC	3.38168	9.73648e-37	1.01694e-35	36.0116	34.9927	125
Chr1B	656745441	656745566	CK_peak_1277	13.1878	-	1	125	0	TraesCS1B03G1150600,TraesCS1B03G1150700LC	4.08924	9.88139e-05	0.00010717	4.00518	3.96993	125
Chr1B	663538592	663538867	CK_peak_1278	56.3556	-	1	275	0	TraesCS1B03G1167300	4.99913	3.07901e-18	1.08459e-17	17.5116	16.9647	275
Chr1B	663957125	663957225	CK_peak_1279	12.8701	-	1	100	0	TraesCS1B03G1168000	4.39303	0.000124182	0.000133572	3.90594	3.87428	100
Chr1B	664479183	664479333	CK_peak_1280	16.9332	-	1	150	0	TraesCS1B03G1168700	5.94281	6.49787e-06	7.99081e-06	5.18723	5.09741	150
Chr1B	668437995	668438070	CK_peak_1281	10.6358	-	1	75	0	TraesCS1B03G1178100	4.15534	0.000617187	0.00062848	3.20958	3.20171	75
Chr1B	670575860	670575985	CK_peak_1282	24.0463	-	1	125	0	TraesCS1B03G1184900	4.46052	3.69913e-08	5.77241e-08	7.4319	7.23864	125
Chr1B	673506011	673506186	CK_peak_1283	66.3165	-	1	175	0	TraesCS1B03G1192300	3.97068	2.51001e-21	1.08829e-20	20.6003	19.9633	175
Chr1B	673903910	673904035	CK_peak_1284	73.637	-	1	125	0	TraesCS1B03G1195400	3.4119	1.36046e-23	6.80854e-23	22.8663	22.1669	125
Chr1B	676500717	676500892	CK_peak_1285	11.1898	-	1	175	0	TraesCS1B03G1204900	4.08334	0.000415583	0.000428075	3.38134	3.36848	175
Chr1B	682937568	682937693	CK_peak_1286	13.9474	-	1	125	0	TraesCS1B03G1237200	6.21067	5.69601e-05	6.33033e-05	4.24443	4.19857	125
Chr1B	683168688	683168863	CK_peak_1287	92.6145	-	1	175	0	TraesCS1B03G1238200	5.38067	1.84759e-29	1.319e-28	28.7334	27.8798	175
Chr1B	684103238	684103488	CK_peak_1288	117.649	-	1	250	0	TraesCS1B03G1241900	4.56359	3.57922e-37	3.83823e-36	36.4462	35.4159	250
Chr1B	684405043	684405218	CK_peak_1289	28.7674	-	1	175	0	TraesCS1B03G1243300	3.80343	1.22077e-09	2.18852e-09	8.91337	8.65985	175
Chr1B	685306647	685306822	CK_peak_1290	40.1214	-	1	175	0	TraesCS1B03G1247100	3.59989	3.40886e-13	8.36123e-13	12.4674	12.0777	175
Chr1B	688630798	688630973	CK_peak_1291	29.3501	-	1	175	0	TraesCS1B03G1257700	3.9403	8.01438e-10	1.46133e-09	9.09613	8.83525	175
Chr1B	688637216	688637441	CK_peak_1292	105.207	-	1	225	0	TraesCS1B03G1257800	3.82083	2.42521e-33	2.13522e-32	32.6152	31.6706	225
Chr1B	690705808	690706058	CK_peak_1293	139.053	-	1	250	0	TraesCS1B03G1263500	4.57841	9.35455e-44	1.38358e-42	43.029	41.859	250
Chr1B	694480168	694480268	CK_peak_1294	37.7456	-	1	100	0	TraesCS1B03G1273900	3.64365	1.87931e-12	4.33944e-12	11.726	11.3626	100
Chr1B	694480293	694480343	CK_peak_1295	21.8168	-	1	50	0	TraesCS1B03G1273900	3.35199	1.86237e-07	2.70702e-07	6.72993	6.56751	50
Chr1B	694493301	694493351	CK_peak_1296	12.4494	-	1	50	0	TraesCS1B03G1273900	4.13021	0.000168355	0.00017879	3.77377	3.74766	50
Chr1B	694518021	694518096	CK_peak_1297	17.8809	-	1	75	0	TraesCS1B03G1274100	4.46646	3.26464e-06	4.14302e-06	5.48616	5.38268	75
Chr1B	694518121	694518296	CK_peak_1298	58.1852	-	1	175	0	TraesCS1B03G1274100	3.82642	8.32435e-19	3.05139e-18	18.0796	17.5155	175
Chr1B	696628717	696628917	CK_peak_1299	198.788	-	1	200	0	TraesCS1B03G1278300	5.76944	4.05683e-62	1.44202e-60	61.3918	59.841	200
Chr1B	696811364	696811489	CK_peak_1300	42.9047	-	1	125	0	TraesCS1B03G1279700	4.67831	4.62592e-14	1.21454e-13	13.3348	12.9156	125
Chr1B	696815076	696815457	CK_peak_1301	16.0929	-	3	3,141,6	0,97,375	TraesCS1B03G1279700	5.24031	1.19627e-05	1.43074e-05	4.92217	4.84444	381
Chr1B	696965928	696965978	CK_peak_1302	12.2357	-	1	50	0	TraesCS1B03G1280200	5.99227	0.000196248	0.000207343	3.70719	3.68331	50
Chr1B	697285452	697285652	CK_peak_1303	64.0561	-	1	200	0	TraesCS1B03G1281000	5.25873	1.2549e-20	5.21415e-20	19.9014	19.2828	200
Chr1D	57450	57550	CK_peak_1304	61.8753	+	1	100	0	TraesCS1D03G0000800	3.1952	5.95016e-20	2.3641e-19	19.2255	18.6263	100
Chr1D	2656250	2656400	CK_peak_1305	53.5247	+	1	150	0	TraesCS1D03G0008200	3.99755	2.30919e-17	7.71703e-17	16.6365	16.1125	150
Chr1D	2685150	2685374	CK_peak_1306	24.3424	+	2	38,87	0,137	TraesCS1D03G0008500	3.74105	2.98033e-08	4.70108e-08	7.52574	7.3278	224
Chr1D	4172017	4172142	CK_peak_1307	17.9617	+	1	125	0	TraesCS1D03G0016000	4.283	3.08011e-06	3.91731e-06	5.51143	5.40701	125
Chr1D	4176396	4176565	CK_peak_1308	41.7977	+	1	169	0	TraesCS1D03G0016100	4.36529	1.02311e-13	2.61593e-13	12.9901	12.5824	169
Chr1D	5897246	5897421	CK_peak_1309	47.4114	+	1	175	0	TraesCS1D03G0022100	3.38574	1.82916e-15	5.34243e-15	14.7377	14.2723	175
Chr1D	5961427	5961727	CK_peak_1310	127.934	+	1	300	0	TraesCS1D03G0022700	5.21185	2.46842e-40	3.07524e-39	39.6076	38.5121	300
Chr1D	12277782	12277982	CK_peak_1311	45.7516	+	1	200	0	TraesCS1D03G0058000	3.64631	6.01665e-15	1.6881e-14	14.2206	13.7726	200
Chr1D	15053289	15053414	CK_peak_1312	29.6183	+	1	125	0	TraesCS1D03G0064000	3.65464	6.59871e-10	1.21336e-09	9.18054	8.91601	125
Chr1D	19487151	19487212	CK_peak_1313	24.3217	+	1	61	0	TraesCS1D03G0074200	3.93695	3.02651e-08	4.76917e-08	7.51906	7.32156	61
Chr1D	20886548	20886598	CK_peak_1314	10.4185	+	1	50	0	TraesCS1D03G0081200	4.02391	0.000719977	0.000730662	3.14268	3.13628	50
Chr1D	23809923	23810098	CK_peak_1315	28.4964	+	1	175	0	TraesCS1D03G0087500LC	3.88757	1.48396e-09	2.64078e-09	8.82858	8.57827	175
Chr1D	27039306	27039681	CK_peak_1316	86.9562	+	1	375	0	TraesCS1D03G0094200	4.98439	1.03361e-27	6.6617e-27	26.9856	26.1764	375
Chr1D	29973827	29974805	CK_peak_1317	386.274	+	2	459,41	0,937	TraesCS1D03G0100100	5.49812	1.10094e-119	5.24631e-117	118.958	116.28	978
Chr1D	29980920	29981120	CK_peak_1318	75.6799	+	1	200	0	TraesCS1D03G0100400	4.5418	3.16621e-24	1.65227e-23	23.4995	22.7819	200
Chr1D	37394543	37394693	CK_peak_1319	12.9616	+	1	150	0	TraesCS1D03G0118700LC	4.91044	0.000116338	0.000125365	3.93428	3.90182	150
Chr1D	39355691	39355776	CK_peak_1320	14.9365	+	1	85	0	TraesCS1D03G0122200	4.97846	2.7798e-05	3.18908e-05	4.55599	4.49634	85
Chr1D	40032256	40032331	CK_peak_1321	18.0503	+	1	75	0	TraesCS1D03G0123600	4.74675	2.8897e-06	3.68406e-06	5.53915	5.43367	75
Chr1D	46151624	46151699	CK_peak_1322	38.9086	+	1	75	0	TraesCS1D03G0138400	3.43143	8.17306e-13	1.93797e-12	12.0876	11.7127	75
Chr1D	51623296	51623518	CK_peak_1323	44.5208	+	2	168,7	0,215	TraesCS1D03G0150100	4.41398	1.4505e-14	3.9618e-14	13.8385	13.4021	222
Chr1D	52630813	52630863	CK_peak_1324	20.0817	+	1	50	0	TraesCS1D03G0151500	4.55829	6.60418e-07	9.01182e-07	6.18018	6.04519	50
Chr1D	58450093	58450230	CK_peak_1325	17.4479	+	1	137	0	TraesCS1D03G0169800	5.18335	4.4742e-06	5.5933e-06	5.34928	5.25233	137
Chr1D	58649274	58649349	CK_peak_1326	39.9937	+	1	75	0	TraesCS1D03G0169900	3.26274	3.7379e-13	9.1345e-13	12.4274	12.0393	75
Chr1D	61670089	61670164	CK_peak_1327	16.6096	+	1	75	0	TraesCS1D03G0173800	4.89972	8.21739e-06	1.00006e-05	5.08527	4.99998	75
Chr1D	63497747	63498072	CK_peak_1328	165.695	+	1	325	0	TraesCS1D03G0180100	4.49713	6.08807e-52	1.32058e-50	51.2155	49.8792	325
Chr1D	63643206	63643531	CK_peak_1329	114.752	+	1	325	0	TraesCS1D03G0180800LC	4.76182	2.80295e-36	2.85901e-35	35.5524	34.5438	325
Chr1D	72294775	72294845	CK_peak_1330	36.0977	+	1	70	0	TraesCS1D03G0195300	3.29764	6.1595e-12	1.35987e-11	11.2105	10.8665	70
Chr1D	76924022	76924197	CK_peak_1331	43.2149	+	1	175	0	TraesCS1D03G0204300	4.16925	3.69926e-14	9.79509e-14	13.4319	13.009	175
Chr1D	78725810	78725902	CK_peak_1332	30.7081	+	1	92	0	TraesCS1D03G0207300	3.4869	3.00276e-10	5.70083e-10	9.52248	9.24406	92
Chr1D	79682657	79682957	CK_peak_1333	66.6884	+	1	300	0	TraesCS1D03G0210200	3.97614	1.93025e-21	8.40984e-21	20.7144	20.0752	300
Chr1D	80546325	80546525	CK_peak_1334	35.6315	+	1	200	0	TraesCS1D03G0212200	3.8978	8.63454e-12	1.87861e-11	11.0638	10.7262	200
Chr1D	82157418	82157468	CK_peak_1335	26.4786	+	1	50	0	TraesCS1D03G0215900	3.54605	6.38032e-09	1.06939e-08	8.19516	7.97086	50
Chr1D	83209648	83209898	CK_peak_1336	57.0826	+	1	250	0	TraesCS1D03G0220100	5.68905	1.83312e-18	6.55256e-18	17.7368	17.1836	250
Chr1D	83616436	83616511	CK_peak_1337	19.8899	+	1	75	0	TraesCS1D03G0221100	3.48854	7.59561e-07	1.02929e-06	6.11944	5.98746	75
Chr1D	83616536	83616586	CK_peak_1338	15.1515	+	1	50	0	TraesCS1D03G0221100	4.11816	2.37834e-05	2.74752e-05	4.62373	4.56106	50
Chr1D	83808780	83808955	CK_peak_1339	19.5269	+	1	175	0	TraesCS1D03G0222100LC	8.86673	9.88493e-07	1.32375e-06	6.00503	5.87819	175
Chr1D	88820372	88820472	CK_peak_1340	26.2221	+	1	100	0	TraesCS1D03G0231800	4.33024	7.67142e-09	1.27751e-08	8.11512	7.89364	100
Chr1D	89108226	89108476	CK_peak_1341	36.3272	+	1	250	0	TraesCS1D03G0232000	7.17141	5.22623e-12	1.15987e-11	11.2818	10.9356	250
Chr1D	90088897	90089147	CK_peak_1342	72.2148	+	1	250	0	TraesCS1D03G0234200,TraesCS1D03G0234400	4.2504	3.73462e-23	1.82471e-22	22.4278	21.7388	250
Chr1D	92283747	92284047	CK_peak_1343	31.6272	+	1	300	0	TraesCS1D03G0237300,TraesCS1D03G0237400	6.82902	1.54801e-10	3.01477e-10	9.81023	9.52075	300
Chr1D	100094212	100094512	CK_peak_1344	75.3786	+	1	300	0	TraesCS1D03G0249200	4.76283	3.93073e-24	2.036e-23	23.4055	22.6912	300
Chr1D	100697406	100697590	CK_peak_1345	35.8567	+	2	49,51	0,133	TraesCS1D03G0250200	6.27872	7.32907e-12	1.60715e-11	11.135	10.7939	184
Chr1D	101097920	101098070	CK_peak_1346	53.3691	+	1	150	0	TraesCS1D03G0251000	3.55504	2.58004e-17	8.59581e-17	16.5884	16.0657	150
Chr1D	102006687	102006962	CK_peak_1347	220.152	+	1	275	0	TraesCS1D03G0251300	6.3174	1.05112e-68	5.34285e-67	67.9783	66.2722	275
Chr1D	102970863	102971088	CK_peak_1348	63.5371	+	1	225	0	TraesCS1D03G0252700	3.83459	1.81887e-20	7.47195e-20	19.7402	19.1266	225
Chr1D	103631438	103631638	CK_peak_1349	43.0678	+	1	200	0	TraesCS1D03G0253400	3.89018	4.11412e-14	1.08465e-13	13.3857	12.9647	200
Chr1D	104257328	104257428	CK_peak_1350	23.3664	+	1	100	0	TraesCS1D03G0255300	3.86412	6.06218e-08	9.24699e-08	7.21737	7.034	100
Chr1D	104258424	104258574	CK_peak_1351	71.4441	+	1	150	0	TraesCS1D03G0255400,TraesCS1D03G0255500LC	4.35112	6.45509e-23	3.11302e-22	22.1901	21.5068	150
Chr1D	105090662	105090814	CK_peak_1352	13.7939	+	2	37,13	0,139	TraesCS1D03G0256700	7.51477	6.36694e-05	7.04057e-05	4.19607	4.15239	152
Chr1D	105103185	105103385	CK_peak_1353	137.693	+	1	200	0	TraesCS1D03G0256700	5.14995	2.46575e-43	3.55055e-42	42.6081	41.4497	200
Chr1D	105672983	105673208	CK_peak_1354	93.1427	+	1	225	0	TraesCS1D03G0257000	3.77562	1.26675e-29	9.14617e-29	28.8973	28.0388	225
Chr1D	106562575	106562745	CK_peak_1355	43.8782	+	1	170	0	TraesCS1D03G0258400	3.52903	2.29817e-14	6.1851e-14	13.6386	13.2087	170
Chr1D	109969858	109970008	CK_peak_1356	77.9137	+	1	150	0	TraesCS1D03G0264000	4.06142	6.49853e-25	3.5128e-24	24.1872	23.4543	150
Chr1D	111225663	111225888	CK_peak_1357	280.355	+	1	225	0	TraesCS1D03G0266200	3.60219	3.32504e-87	4.02408e-85	86.4782	84.3953	225
Chr1D	113072626	113072801	CK_peak_1358	29.2251	+	1	175	0	TraesCS1D03G0269400,TraesCS1D03G0269500	3.65599	8.77186e-10	1.59354e-09	9.05691	8.79764	175
Chr1D	119607281	119607431	CK_peak_1359	108.013	+	1	150	0	TraesCS1D03G0284200	6.14863	3.31316e-34	3.05456e-33	33.4798	32.5151	150
Chr1D	123594847	123594897	CK_peak_1360	11.2787	+	1	50	0	TraesCS1D03G0287300	4.31663	0.000389922	0.000402516	3.40902	3.39522	50
Chr1D	124194717	124194783	CK_peak_1361	19.7568	+	1	66	0	TraesCS1D03G0287900	3.58696	8.36398e-07	1.12879e-06	6.07759	5.94739	66
Chr1D	124360335	124360385	CK_peak_1362	9.98301	+	1	50	0	TraesCS1D03G0288200	4.90014	0.000981391	0.00098813	3.00816	3.00519	50
Chr1D	124360960	124361047	CK_peak_1363	27.9606	+	1	87	0	TraesCS1D03G0288200	7.19936	2.1868e-09	3.82854e-09	8.66019	8.41697	87
Chr1D	124675423	124675673	CK_peak_1364	153.828	+	1	250	0	TraesCS1D03G0288500	4.06138	2.6664e-48	4.93446e-47	47.5741	46.3068	250
Chr1D	125820888	125821148	CK_peak_1365	158.847	+	1	260	0	TraesCS1D03G0289400	3.61936	7.63154e-50	1.52122e-48	49.1174	47.8178	260
Chr1D	127323683	127323883	CK_peak_1366	55.3587	+	1	200	0	TraesCS1D03G0291600	4.99494	6.2742e-18	2.1646e-17	17.2024	16.6646	200
Chr1D	128804956	128805081	CK_peak_1367	35.1592	+	1	125	0	TraesCS1D03G0293700	3.53454	1.21029e-11	2.60637e-11	10.9171	10.584	125
Chr1D	131522313	131522511	CK_peak_1368	129.291	+	1	198	0	TraesCS1D03G0296200	4.11383	9.46779e-41	1.20112e-39	40.0238	38.9204	198
Chr1D	133290751	133291051	CK_peak_1369	262.227	+	1	300	0	TraesCS1D03G0297100	5.32853	1.25551e-81	1.15333e-79	80.9012	78.938	300
Chr1D	141246622	141246797	CK_peak_1370	97.5549	+	1	175	0	TraesCS1D03G0302600	4.92679	5.54956e-31	4.2957e-30	30.2557	29.367	175
Chr1D	145601743	145601843	CK_peak_1371	36.654	+	1	100	0	TraesCS1D03G0308500	3.48206	4.13372e-12	9.24811e-12	11.3837	11.0339	100
Chr1D	146298018	146298347	CK_peak_1372	22.7694	+	2	68,82	0,247	TraesCS1D03G0310700,TraesCS1D03G0310800	3.53077	9.34398e-08	1.39871e-07	7.02947	6.85427	329
Chr1D	152560362	152560487	CK_peak_1373	139.059	+	1	125	0	TraesCS1D03G0316300	3.84046	9.29752e-44	1.37761e-42	43.0316	41.8609	125
Chr1D	158613733	158613858	CK_peak_1374	13.8864	+	1	125	0	TraesCS1D03G0318900	5.03731	5.95252e-05	6.60337e-05	4.2253	4.18023	125
Chr1D	158619705	158619880	CK_peak_1375	66.3577	+	1	175	0	TraesCS1D03G0318900	4.07833	2.43794e-21	1.05764e-20	20.613	19.9757	175
Chr1D	159017734	159017909	CK_peak_1376	46.8319	+	1	175	0	TraesCS1D03G0320000	3.7984	2.77471e-15	7.98332e-15	14.5568	14.0978	175
Chr1D	162019896	162020221	CK_peak_1377	125.277	+	1	325	0	TraesCS1D03G0322500	3.60292	1.62091e-39	1.94013e-38	38.7902	37.7122	325
Chr1D	164954773	164955012	CK_peak_1378	92.73	+	1	239	0	TraesCS1D03G0325400	4.55871	1.69991e-29	1.21756e-28	28.7696	27.9145	239
Chr1D	179786129	179786254	CK_peak_1379	60.4337	+	1	125	0	TraesCS1D03G0338300	3.54473	1.67059e-19	6.42168e-19	18.7771	18.1924	125
Chr1D	179786304	179786379	CK_peak_1380	32.3788	+	1	75	0	TraesCS1D03G0338300	3.32131	8.97404e-11	1.7907e-10	10.047	9.74698	75
Chr1D	181312726	181312851	CK_peak_1381	32.3371	+	1	125	0	TraesCS1D03G0338600	3.37917	9.24649e-11	1.84313e-10	10.034	9.73444	125
Chr1D	183691806	183692056	CK_peak_1382	86.7142	+	1	250	0	TraesCS1D03G0342000	4.10105	1.22756e-27	7.87841e-27	26.911	26.1036	250
Chr1D	184460657	184460957	CK_peak_1383	160.24	+	1	300	0	TraesCS1D03G0342500	5.28448	2.84627e-50	5.79477e-49	49.5457	48.237	300
Chr1D	187273201	187273488	CK_peak_1384	98.404	+	1	287	0	TraesCS1D03G0344600	4.64504	3.02915e-31	2.38469e-30	30.5187	29.6226	287
Chr1D	187868206	187868342	CK_peak_1385	21.9184	+	1	136	0	TraesCS1D03G0344800	3.59708	1.72926e-07	2.52292e-07	6.76214	6.5981	136
Chr1D	188808950	188809050	CK_peak_1386	27.4978	+	1	100	0	TraesCS1D03G0346500	4.2519	3.05922e-09	5.27656e-09	8.51439	8.27765	100
Chr1D	191127955	191128099	CK_peak_1387	42.6789	+	1	144	0	TraesCS1D03G0347700	3.98942	5.43731e-14	1.42024e-13	13.2646	12.8476	144
Chr1D	192449252	192449319	CK_peak_1388	15.335	+	1	67	0	TraesCS1D03G0348800	4.35279	2.08195e-05	2.41942e-05	4.68153	4.61629	67
Chr1D	195335350	195335400	CK_peak_1389	16.2641	+	1	50	0	TraesCS1D03G0351900	3.11774	1.05598e-05	1.27063e-05	4.97634	4.89598	50
Chr1D	197228938	197229363	CK_peak_1390	86.1559	+	1	425	0	TraesCS1D03G0356400	4.79845	1.82656e-27	1.16007e-26	26.7384	25.9355	425
Chr1D	197434714	197434814	CK_peak_1391	15.6713	+	1	100	0	TraesCS1D03G0356700	6.76326	1.62807e-05	1.91636e-05	4.78833	4.71752	100
Chr1D	200470328	200470603	CK_peak_1392	67.6588	+	1	275	0	TraesCS1D03G0360500	6.41855	9.64059e-22	4.29224e-21	21.0159	20.3673	275
Chr1D	201030377	201030622	CK_peak_1393	36.3421	+	1	245	0	TraesCS1D03G0361700	5.19298	5.17202e-12	1.14801e-11	11.2863	10.9401	245
Chr1D	202104914	202104964	CK_peak_1394	10.5952	+	1	50	0	TraesCS1D03G0363600	5.19972	0.000635413	0.000646435	3.19694	3.18947	50
Chr1D	202338502	202338552	CK_peak_1395	16.1375	+	1	50	0	TraesCS1D03G0364300	4.16003	1.15763e-05	1.38713e-05	4.93643	4.85788	50
Chr1D	204227294	204227519	CK_peak_1396	93.3363	+	1	225	0	TraesCS1D03G0369000	4.23801	1.10243e-29	7.99763e-29	28.9576	28.097	225
Chr1D	205286152	205286265	CK_peak_1397	21.5547	+	1	113	0	TraesCS1D03G0370800	4.26387	2.25695e-07	3.24621e-07	6.64648	6.48862	113
Chr1D	206742049	206742224	CK_peak_1398	70.2076	+	1	175	0	TraesCS1D03G0375200	3.68768	1.56048e-22	7.33531e-22	21.8067	21.1346	175
Chr1D	207345994	207346269	CK_peak_1399	46.5784	+	1	275	0	TraesCS1D03G0376600	4.1627	3.32776e-15	9.51707e-15	14.4778	14.0215	275
Chr1D	208190923	208191048	CK_peak_1400	29.2506	+	1	125	0	TraesCS1D03G0377600,TraesCS1D03G0377700	10.2964	8.60791e-10	1.56563e-09	9.0651	8.80531	125
Chr1D	209207314	209207489	CK_peak_1401	21.6842	+	1	175	0	TraesCS1D03G0380400	4.10206	2.05373e-07	2.96762e-07	6.68746	6.52759	175
Chr1D	210362067	210362267	CK_peak_1402	158.517	+	1	200	0	TraesCS1D03G0383700	4.66458	9.66777e-50	1.91211e-48	49.0147	47.7185	200
Chr1D	214368308	214368433	CK_peak_1403	29.5398	+	1	125	0	TraesCS1D03G0390700	3.74656	6.98309e-10	1.28125e-09	9.15595	8.89236	125
Chr1D	214641189	214641339	CK_peak_1404	26.1237	+	1	150	0	TraesCS1D03G0391800	3.75207	8.246e-09	1.36767e-08	8.08376	7.86402	150
Chr1D	215203164	215203635	CK_peak_1405	134.209	+	1	471	0	TraesCS1D03G0396400	4.92292	2.89648e-42	3.97198e-41	41.5381	40.401	471
Chr1D	215211935	215212035	CK_peak_1406	22.8833	+	1	100	0	TraesCS1D03G0397500	3.47574	8.60015e-08	1.29257e-07	7.06549	6.88855	100
Chr1D	216018969	216019094	CK_peak_1407	25.0667	+	1	125	0	TraesCS1D03G0398100	4.10164	1.76808e-08	2.84553e-08	7.7525	7.54584	125
Chr1D	217085833	217085983	CK_peak_1408	124.576	+	1	150	0	TraesCS1D03G0398800	3.27715	2.65674e-39	3.15519e-38	38.5757	37.501	150
Chr1D	220312619	220312719	CK_peak_1409	13.771	+	1	100	0	TraesCS1D03G0402600	5.46862	6.47495e-05	7.15327e-05	4.18876	4.1455	100
Chr1D	223085007	223085307	CK_peak_1410	35.7783	+	1	300	0	TraesCS1D03G0404900	4.19847	7.75843e-12	1.69691e-11	11.1102	10.7703	300
Chr1D	223589430	223589555	CK_peak_1411	18.1509	+	1	125	0	TraesCS1D03G0405600LC	6.20799	2.68606e-06	3.43593e-06	5.57088	5.46396	125
Chr1D	225393384	225393459	CK_peak_1412	51.5938	+	1	75	0	TraesCS1D03G0408000	4.09515	9.18903e-17	2.94254e-16	16.0367	15.5313	75
Chr1D	225829057	225829207	CK_peak_1413	48.558	+	1	150	0	TraesCS1D03G0408900	3.47164	8.05312e-16	2.41309e-15	15.094	14.6174	150
Chr1D	228359928	228360128	CK_peak_1414	241.955	+	1	200	0	TraesCS1D03G0413000	5.76271	2.16382e-75	1.46001e-73	74.6648	72.8356	200
Chr1D	230293742	230293817	CK_peak_1415	12.2887	+	1	75	0	TraesCS1D03G0415200	3.93835	0.000188923	0.000199869	3.72372	3.69925	75
Chr1D	230508567	230508817	CK_peak_1416	65.3763	+	1	250	0	TraesCS1D03G0415700	4.20367	4.88879e-21	2.08821e-20	20.3108	19.6802	250
Chr1D	233298449	233298624	CK_peak_1417	74.4774	+	1	175	0	TraesCS1D03G0418400	3.424	7.47605e-24	3.80261e-23	23.1263	22.4199	175
Chr1D	236412891	236413016	CK_peak_1418	23.1793	+	1	125	0	TraesCS1D03G0420700	4.63842	6.94266e-08	1.05279e-07	7.15847	6.97766	125
Chr1D	239058647	239058722	CK_peak_1419	133.505	+	1	75	0	TraesCS1D03G0426100	3.56618	4.75214e-42	6.47012e-41	41.3231	40.1891	75
Chr1D	239122609	239122784	CK_peak_1420	64.7792	+	1	175	0	TraesCS1D03G0426200	3.48544	7.49229e-21	3.15869e-20	20.1254	19.5005	175
Chr1D	239762600	239762736	CK_peak_1421	32.4157	+	1	136	0	TraesCS1D03G0427800	10.7945	8.73932e-11	1.74546e-10	10.0585	9.75809	136
Chr1D	243830285	243830397	CK_peak_1422	21.6797	+	1	112	0	TraesCS1D03G0433600	4.59697	2.06067e-07	2.9768e-07	6.68599	6.52625	112
Chr1D	248590373	248590548	CK_peak_1423	27.4448	+	1	175	0	TraesCS1D03G0443800	5.16336	3.17726e-09	5.47396e-09	8.49795	8.2617	175
Chr1D	252808287	252808462	CK_peak_1424	60.9755	+	1	175	0	TraesCS1D03G0452900	4.07325	1.1342e-19	4.41098e-19	18.9453	18.3555	175
Chr1D	253328953	253329228	CK_peak_1425	41.8185	+	1	275	0	TraesCS1D03G0454100	4.07811	1.00767e-13	2.57861e-13	12.9967	12.5886	275
Chr1D	255914259	255914384	CK_peak_1426	12.6963	+	1	125	0	TraesCS1D03G0458900LC	5.23059	0.000140777	0.000150667	3.85147	3.82198	125
Chr1D	257176688	257176963	CK_peak_1427	140.537	+	1	275	0	TraesCS1D03G0473300	4.5608	3.25794e-44	4.94332e-43	43.4871	42.306	275
Chr1D	257177113	257177288	CK_peak_1428	28.255	+	1	175	0	TraesCS1D03G0473300	3.19604	1.76551e-09	3.12179e-09	8.75313	8.5056	175
Chr1D	257355190	257355440	CK_peak_1429	114.646	+	1	250	0	TraesCS1D03G0473700,TraesCS1D03G0473800	5.43807	3.02489e-36	3.07715e-35	35.5193	34.5119	250
Chr1D	257355490	257355540	CK_peak_1430	14.6747	+	1	50	0	TraesCS1D03G0473700,TraesCS1D03G0473800	4.25553	3.35945e-05	3.82357e-05	4.47373	4.41753	50
Chr1D	258055472	258055597	CK_peak_1431	15.9243	+	1	125	0	TraesCS1D03G0474400,TraesCS1D03G0474500	6.75919	1.35323e-05	1.60812e-05	4.86863	4.79368	125
Chr1D	258064992	258065067	CK_peak_1432	37.4947	+	1	75	0	TraesCS1D03G0474600	3.77708	2.25253e-12	5.16367e-12	11.6473	11.287	75
Chr1D	258396449	258396499	CK_peak_1433	16.3144	+	1	50	0	TraesCS1D03G0474800	5.18946	1.01828e-05	1.22707e-05	4.99213	4.91113	50
Chr1D	260903322	260903397	CK_peak_1434	16.0942	+	1	75	0	TraesCS1D03G0478800	4.29369	1.19512e-05	1.42947e-05	4.92259	4.84482	75
Chr1D	260913359	260913459	CK_peak_1435	15.0374	+	1	100	0	TraesCS1D03G0479000	4.15697	2.58557e-05	2.97363e-05	4.58744	4.52671	100
Chr1D	260916954	260917029	CK_peak_1436	15.2626	+	1	75	0	TraesCS1D03G0479100	5.16047	2.19335e-05	2.54383e-05	4.65889	4.59451	75
Chr1D	264284522	264284622	CK_peak_1437	17.7571	+	1	100	0	TraesCS1D03G0484700,TraesCS1D03G0484900	5.01526	3.57099e-06	4.51414e-06	5.44721	5.34543	100
Chr1D	269898807	269898982	CK_peak_1438	17.8216	+	1	175	0	TraesCS1D03G0490300,TraesCS1D03G0490400	4.73845	3.40754e-06	4.31682e-06	5.46756	5.36484	175
Chr1D	270321445	270321737	CK_peak_1439	69.2344	+	1	292	0	TraesCS1D03G0491000	4.41098	3.13324e-22	1.43999e-21	21.504	20.8416	292
Chr1D	270504656	270504706	CK_peak_1440	24.4352	+	1	50	0	TraesCS1D03G0491200	3.65091	2.78731e-08	4.40818e-08	7.55481	7.35574	50
Chr1D	271882564	271882764	CK_peak_1441	76.2135	+	1	200	0	TraesCS1D03G0492600	4.05014	2.16703e-24	1.14145e-23	23.6641	22.9425	200
Chr1D	276463518	276463643	CK_peak_1442	30.6927	+	1	125	0	TraesCS1D03G0498300	3.32198	3.03721e-10	5.76193e-10	9.51753	9.23943	125
Chr1D	276466811	276466986	CK_peak_1443	60.2772	+	1	175	0	TraesCS1D03G0498400	3.59017	1.86719e-19	7.15757e-19	18.7288	18.1452	175
Chr1D	277113022	277113297	CK_peak_1444	51.444	+	1	275	0	TraesCS1D03G0499300LC,TraesCS1D03G0499400	4.83489	1.02264e-16	3.26445e-16	15.9903	15.4862	275
Chr1D	281179210	281179310	CK_peak_1445	48.1447	+	1	100	0	TraesCS1D03G0504300	3.3854	1.08261e-15	3.2137e-15	14.9655	14.493	100
Chr1D	281181498	281181644	CK_peak_1446	141.083	+	1	146	0	TraesCS1D03G0504300	3.45383	2.20592e-44	3.38753e-43	43.6564	42.4701	146
Chr1D	284054479	284054629	CK_peak_1447	51.9039	+	1	150	0	TraesCS1D03G0507700,TraesCS1D03G0507800	3.42775	7.36027e-17	2.37337e-16	16.1331	15.6246	150
Chr1D	286203958	286204083	CK_peak_1448	28.6203	+	1	125	0	TraesCS1D03G0509600	4.29178	1.35734e-09	2.42338e-09	8.86731	8.61558	125
Chr1D	286891282	286891357	CK_peak_1449	28.5812	+	1	75	0	TraesCS1D03G0511000	3.99141	1.39596e-09	2.49e-09	8.85513	8.6038	75
Chr1D	287356605	287356755	CK_peak_1450	11.1482	+	1	150	0	TraesCS1D03G0511400	3.57995	0.000428149	0.000440602	3.36841	3.35595	150
Chr1D	287698375	287698548	CK_peak_1451	40.3644	+	1	173	0	TraesCS1D03G0512000,TraesCS1D03G0512100LC	4.17558	2.86502e-13	7.0648e-13	12.5429	12.1509	173
Chr1D	289387023	289387223	CK_peak_1452	44.2861	+	1	200	0	TraesCS1D03G0514300,TraesCS1D03G0514400LC	8.50943	1.7166e-14	4.66188e-14	13.7653	13.3314	200
Chr1D	295206793	295206868	CK_peak_1453	14.2774	+	1	75	0	TraesCS1D03G0522300	4.56016	4.48474e-05	5.03592e-05	4.34826	4.29792	75
Chr1D	296019731	296019931	CK_peak_1454	42.5509	+	1	200	0	TraesCS1D03G0523000	4.20368	5.95807e-14	1.55201e-13	13.2249	12.8091	200
Chr1D	297749090	297749165	CK_peak_1455	10.6975	+	1	75	0	TraesCS1D03G0526300	6.32264	0.00059057	0.00060218	3.22873	3.22027	75
Chr1D	297761647	297761822	CK_peak_1456	38.9681	+	1	175	0	TraesCS1D03G0526400	3.51286	7.82916e-13	1.85961e-12	12.1063	11.7306	175
Chr1D	298886215	298886364	CK_peak_1457	64.6824	+	1	149	0	TraesCS1D03G0528400	3.66494	8.03441e-21	3.37791e-20	20.095	19.4714	149
Chr1D	300162391	300162441	CK_peak_1458	20.0941	+	1	50	0	TraesCS1D03G0531600	3.73651	6.54281e-07	8.93448e-07	6.18424	6.04893	50
Chr1D	304238301	304238351	CK_peak_1459	21.3238	+	1	50	0	TraesCS1D03G0539400,TraesCS1D03G0539600LC	3.69167	2.67078e-07	3.8098e-07	6.57336	6.4191	50
Chr1D	304996969	304997069	CK_peak_1460	30.2375	+	1	100	0	TraesCS1D03G0541100	4.30556	4.21834e-10	7.89948e-10	9.37486	9.1024	100
Chr1D	305939688	305939881	CK_peak_1461	68.4197	+	1	193	0	TraesCS1D03G0543900	4.92392	5.61104e-22	2.53294e-21	21.251	20.5964	193
Chr1D	307965407	307965532	CK_peak_1462	33.1771	+	1	125	0	TraesCS1D03G0545500	3.70859	5.04322e-11	1.02964e-10	10.2973	9.98731	125
Chr1D	310557519	310557787	CK_peak_1463	48.4495	+	2	100,75	0,193	TraesCS1D03G0548500	4.58646	8.69632e-16	2.60173e-15	15.0607	14.5847	268
Chr1D	312629248	312629448	CK_peak_1464	93.7402	+	1	200	0	TraesCS1D03G0552600	4.83826	8.27312e-30	6.04489e-29	29.0823	28.2186	200
Chr1D	313733539	313733589	CK_peak_1465	13.138	+	1	50	0	TraesCS1D03G0553900	4.12804	0.000102427	0.000110938	3.98959	3.95492	50
Chr1D	314055270	314055370	CK_peak_1466	41.4296	+	1	100	0	TraesCS1D03G0554100	3.51786	1.33295e-13	3.37643e-13	12.8752	12.4715	100
Chr1D	315649526	315649626	CK_peak_1467	15.2894	+	1	100	0	TraesCS1D03G0555700	3.73441	2.15152e-05	2.49703e-05	4.66725	4.60258	100
Chr1D	317051103	317051228	CK_peak_1468	24.0805	+	1	125	0	TraesCS1D03G0558700	3.49349	3.60803e-08	5.63718e-08	7.44273	7.24894	125
Chr1D	320317115	320317240	CK_peak_1469	30.2696	+	1	125	0	TraesCS1D03G0564600LC,TraesCS1D03G0564700	4.0356	4.12148e-10	7.72569e-10	9.38495	9.11206	125
Chr1D	324582543	324582593	CK_peak_1470	15.0715	+	1	50	0	TraesCS1D03G0572700	4.27594	2.52342e-05	2.90413e-05	4.59801	4.53698	50
Chr1D	324585852	324586027	CK_peak_1471	26.7044	+	1	175	0	TraesCS1D03G0572700	4.70307	5.41899e-09	9.145e-09	8.26608	8.03882	175
Chr1D	327972318	327972393	CK_peak_1472	28.4171	+	1	75	0	TraesCS1D03G0577800	3.73928	1.57169e-09	2.79005e-09	8.80363	8.55439	75
Chr1D	328260892	328261067	CK_peak_1473	55.9195	+	1	175	0	TraesCS1D03G0578300	3.88505	4.21393e-18	1.46742e-17	17.3753	16.8334	175
Chr1D	328787920	328788045	CK_peak_1474	23.0135	+	1	125	0	TraesCS1D03G0579700	3.34062	7.83089e-08	1.18102e-07	7.10619	6.92774	125
Chr1D	331188574	331188824	CK_peak_1475	144.368	+	1	250	0	TraesCS1D03G0583400	5.60633	2.14253e-45	3.47569e-44	44.6691	43.459	250
Chr1D	332021426	332021526	CK_peak_1476	40.9326	+	1	100	0	TraesCS1D03G0584900,TraesCS1D03G0585100	5.13133	1.90793e-13	4.76482e-13	12.7194	12.322	100
Chr1D	333583971	333584246	CK_peak_1477	320.52	+	1	275	0	TraesCS1D03G0586500	4.79184	1.64854e-99	3.26474e-97	98.7829	96.4862	275
Chr1D	334193557	334193732	CK_peak_1478	35.1181	+	1	175	0	TraesCS1D03G0587100	3.68442	1.24663e-11	2.68161e-11	10.9043	10.5716	175
Chr1D	334673302	334673416	CK_peak_1479	55.2397	+	1	114	0	TraesCS1D03G0587900	4.08087	6.8353e-18	2.35073e-17	17.1652	16.6288	114
Chr1D	335202783	335202982	CK_peak_1480	251.206	+	1	199	0	TraesCS1D03G0589600	3.50872	3.18894e-78	2.39547e-76	77.4964	75.6206	199
Chr1D	335224571	335224646	CK_peak_1481	30.6368	+	1	75	0	TraesCS1D03G0590100	3.71458	3.16239e-10	5.98973e-10	9.49998	9.22259	75
Chr1D	336491837	336491984	CK_peak_1482	45.2224	+	1	147	0	TraesCS1D03G0591500	3.78727	8.76449e-15	2.4362e-14	14.0573	13.6133	147
Chr1D	336720662	336720849	CK_peak_1483	17.8178	+	2	2,48	0,139	TraesCS1D03G0591800	5.22179	3.41703e-06	4.32813e-06	5.46635	5.3637	187
Chr1D	336730763	336730963	CK_peak_1484	38.8023	+	1	200	0	TraesCS1D03G0591900	4.76159	8.82271e-13	2.08618e-12	12.0544	11.6806	200
Chr1D	337528632	337528857	CK_peak_1485	154.75	+	1	225	0	TraesCS1D03G0592700	5.53029	1.37921e-48	2.60292e-47	47.8604	46.5845	225
Chr1D	338595154	338595229	CK_peak_1486	24.5089	+	1	75	0	TraesCS1D03G0594600	3.32651	2.64114e-08	4.18874e-08	7.57821	7.37792	75
Chr1D	338595254	338595304	CK_peak_1487	34.4653	+	1	50	0	TraesCS1D03G0594600	4.40929	1.99095e-11	4.21609e-11	10.7009	10.3751	50
Chr1D	338595379	338595454	CK_peak_1488	13.3176	+	1	75	0	TraesCS1D03G0594600	3.9847	8.98662e-05	9.79465e-05	4.0464	4.00901	75
Chr1D	339465261	339465574	CK_peak_1489	151.44	+	1	313	0	TraesCS1D03G0596000,TraesCS1D03G0596100	5.73818	1.4411e-47	2.5823e-46	46.8413	45.588	313
Chr1D	340144480	340144630	CK_peak_1490	31.5312	+	1	150	0	TraesCS1D03G0596200,TraesCS1D03G0596300	4.11575	1.65798e-10	3.22236e-10	9.78042	9.49183	150
Chr1D	340616954	340617129	CK_peak_1491	38.26	+	1	175	0	TraesCS1D03G0596800	4.63999	1.30158e-12	3.03808e-12	11.8855	11.5174	175
Chr1D	341120364	341120439	CK_peak_1492	29.8872	+	1	75	0	TraesCS1D03G0597400	3.55283	5.43598e-10	1.00709e-09	9.26472	8.99693	75
Chr1D	342535144	342535394	CK_peak_1493	118.743	+	1	250	0	TraesCS1D03G0599200	5.08687	1.64656e-37	1.79859e-36	36.7834	35.7451	250
Chr1D	343502398	343502448	CK_peak_1494	20.4193	+	1	50	0	TraesCS1D03G0601500	3.34952	5.16676e-07	7.13142e-07	6.28678	6.14682	50
Chr1D	345080818	345081091	CK_peak_1495	27.1616	+	2	54121	0,152	TraesCS1D03G0605500	4.60114	3.89691e-09	6.66114e-09	8.40928	8.17645	273
Chr1D	345081266	345081591	CK_peak_1496	120.893	+	1	325	0	TraesCS1D03G0605500,TraesCS1D03G0605600	7.07308	3.61306e-38	4.05114e-37	37.4421	36.3924	325
Chr1D	345088458	345088583	CK_peak_1497	53.0232	+	1	125	0	TraesCS1D03G0605700	4.85748	3.30077e-17	1.09254e-16	16.4814	15.9616	125
Chr1D	346274398	346274535	CK_peak_1498	27.783	+	1	137	0	TraesCS1D03G0608000	3.70984	2.48851e-09	4.32991e-09	8.60406	8.36352	137
Chr1D	346784784	346785084	CK_peak_1499	170.748	+	1	300	0	TraesCS1D03G0609300,TraesCS1D03G0609400	4.8215	1.67497e-53	3.97843e-52	52.776	51.4003	300
Chr1D	348022553	348022670	CK_peak_1500	39.7029	+	1	117	0	TraesCS1D03G0611400	3.55487	4.60867e-13	1.11747e-12	12.3364	11.9518	117
Chr1D	349513017	349513167	CK_peak_1501	31.8089	+	1	150	0	TraesCS1D03G0613900	3.9823	1.3561e-10	2.65799e-10	9.86771	9.57545	150
Chr1D	350325594	350325644	CK_peak_1502	10.741	+	1	50	0	TraesCS1D03G0615600	4.68598	0.00057234	0.000584295	3.24235	3.23337	50
Chr1D	350356088	350356313	CK_peak_1503	64.3788	+	1	225	0	TraesCS1D03G0615800	3.98762	9.96563e-21	4.16916e-20	20.0015	19.38	225
Chr1D	350361760	350361925	CK_peak_1504	165.553	+	1	165	0	TraesCS1D03G0615900	3.93054	6.74821e-52	1.45756e-50	51.1708	49.8364	165
Chr1D	351478919	351478969	CK_peak_1505	24.1189	+	1	50	0	TraesCS1D03G0617600	4.12611	3.50673e-08	5.48903e-08	7.4551	7.2605	50
Chr1D	352553075	352553200	CK_peak_1506	23.6887	+	1	125	0	TraesCS1D03G0619100LC,TraesCS1D03G0619200	3.73849	4.79484e-08	7.39596e-08	7.31923	7.13101	125
Chr1D	356742985	356743235	CK_peak_1507	64.5079	+	1	250	0	TraesCS1D03G0627300	3.80606	9.09779e-21	3.81237e-20	20.0411	19.4188	250
Chr1D	356791713	356791786	CK_peak_1508	13.6464	+	1	73	0	TraesCS1D03G0627900	4.59718	7.08386e-05	7.79884e-05	4.14973	4.10797	73
Chr1D	356802336	356802536	CK_peak_1509	31.2788	+	1	200	0	TraesCS1D03G0628300	4.53721	1.98804e-10	3.83839e-10	9.70158	9.41585	200
Chr1D	357446487	357446562	CK_peak_1510	25.5124	+	1	75	0	TraesCS1D03G0629500	3.98791	1.27919e-08	2.08936e-08	7.89307	7.67999	75
Chr1D	357457540	357457733	CK_peak_1511	107.668	+	1	193	0	TraesCS1D03G0629600	4.12832	4.22643e-34	3.88013e-33	33.374	32.4112	193
Chr1D	358415192	358415392	CK_peak_1512	45.179	+	1	200	0	TraesCS1D03G0632400	3.97741	9.03843e-15	2.51051e-14	14.0439	13.6002	200
Chr1D	359699223	359699348	CK_peak_1513	51.3149	+	1	125	0	TraesCS1D03G0634500	3.4628	1.12186e-16	3.56996e-16	15.9501	15.4473	125
Chr1D	359719036	359719111	CK_peak_1514	12.3503	+	1	75	0	TraesCS1D03G0634700	4.56794	0.000180791	0.000191512	3.74282	3.7178	75
Chr1D	362719897	362720069	CK_peak_1515	15.5728	+	2	36,39	0,133	TraesCS1D03G0637900	3.87051	1.75008e-05	2.05173e-05	4.75694	4.68788	172
Chr1D	364057453	364057603	CK_peak_1516	41.778	+	1	150	0	TraesCS1D03G0640500	4.20423	1.03774e-13	2.652e-13	12.9839	12.5764	150
Chr1D	367014986	367015161	CK_peak_1517	113.52	+	1	175	0	TraesCS1D03G0646400	5.767	6.7331e-36	6.71504e-35	35.1718	34.173	175
Chr1D	367774940	367775065	CK_peak_1518	22.2937	+	1	125	0	TraesCS1D03G0649000	3.2954	1.31871e-07	1.94497e-07	6.87985	6.71109	125
Chr1D	368222347	368222522	CK_peak_1519	61.3108	+	1	175	0	TraesCS1D03G0650100	4.07125	8.91915e-20	3.49635e-19	19.0497	18.4564	175
Chr1D	369381730	369381955	CK_peak_1520	89.4465	+	1	225	0	TraesCS1D03G0653700LC	3.51116	1.75401e-28	1.18559e-27	27.756	26.9261	225
Chr1D	370068035	370068160	CK_peak_1521	43.8691	+	1	125	0	TraesCS1D03G0654900	3.96958	2.31394e-14	6.22426e-14	13.6356	13.2059	125
Chr1D	375616091	375616266	CK_peak_1522	57.8919	+	1	175	0	TraesCS1D03G0665500	3.75338	1.02554e-18	3.73948e-18	17.989	17.4272	175
Chr1D	380905227	380905302	CK_peak_1523	14.674	+	1	75	0	TraesCS1D03G0674300,TraesCS1D03G0674400LC	4.36032	3.36147e-05	3.82545e-05	4.47347	4.41732	75
Chr1D	381632311	381632411	CK_peak_1524	37.3057	+	1	100	0	TraesCS1D03G0675200	4.31376	2.58261e-12	5.88673e-12	11.5879	11.2301	100
Chr1D	381655497	381655597	CK_peak_1525	18.2938	+	1	100	0	TraesCS1D03G0675400	3.4292	2.42109e-06	3.11186e-06	5.61599	5.50698	100
Chr1D	381993215	381993490	CK_peak_1526	146.745	+	1	275	0	TraesCS1D03G0677700,TraesCS1D03G0678000	6.48073	4.00142e-46	6.69053e-45	45.3978	44.1745	275
Chr1D	383201121	383201171	CK_peak_1527	14.0817	+	1	50	0	TraesCS1D03G0679200	3.99644	5.1657e-05	5.76744e-05	4.28687	4.23902	50
Chr1D	383206658	383206758	CK_peak_1528	48.9171	+	1	100	0	TraesCS1D03G0679200	3.38434	6.22226e-16	1.88148e-15	15.2061	14.7255	100
Chr1D	384818953	384819053	CK_peak_1529	39.2436	+	1	100	0	TraesCS1D03G0681600	4.25339	6.41608e-13	1.53641e-12	12.1927	11.8135	100
Chr1D	384822028	384822173	CK_peak_1530	97.1314	+	1	145	0	TraesCS1D03G0681600	3.96538	7.49998e-31	5.76157e-30	30.1249	29.2395	145
Chr1D	388607881	388608031	CK_peak_1531	35.0553	+	1	150	0	TraesCS1D03G0690200	4.38576	1.30427e-11	2.80085e-11	10.8846	10.5527	150
Chr1D	389130153	389130353	CK_peak_1532	44.193	+	1	200	0	TraesCS1D03G0691900	5.34116	1.83553e-14	4.97247e-14	13.7362	13.3034	200
Chr1D	389238113	389238338	CK_peak_1533	56.084	+	1	225	0	TraesCS1D03G0692000	4.04576	3.74769e-18	1.30925e-17	17.4262	16.883	225
Chr1D	390216824	390216924	CK_peak_1534	14.3702	+	1	100	0	TraesCS1D03G0694200	7.77468	4.19455e-05	4.72224e-05	4.37731	4.32585	100
Chr1D	390825668	390825841	CK_peak_1535	51.1739	+	1	173	0	TraesCS1D03G0695000	4.67668	1.24173e-16	3.93664e-16	15.906	15.4049	173
Chr1D	391187463	391187635	CK_peak_1536	129.496	+	1	172	0	TraesCS1D03G0695600LC	4.19661	8.18613e-41	1.04199e-39	40.0869	38.9821	172
Chr1D	395068278	395068395	CK_peak_1537	31.9155	+	1	117	0	TraesCS1D03G0702900LC	3.74562	1.25553e-10	2.46873e-10	9.90117	9.60753	117
Chr1D	395259843	395259918	CK_peak_1538	29.8033	+	1	75	0	TraesCS1D03G0703400	4.43416	5.77681e-10	1.06738e-09	9.23831	8.97168	75
Chr1D	397770942	397771092	CK_peak_1539	23.3901	+	1	150	0	TraesCS1D03G0710900	4.38296	5.95864e-08	9.09634e-08	7.22485	7.04113	150
Chr1D	400606828	400607028	CK_peak_1540	61.1049	+	1	200	0	TraesCS1D03G0717700	4.43075	1.03188e-19	4.0326e-19	18.9864	18.3944	200
Chr1D	401119874	401119924	CK_peak_1541	49.9816	+	1	50	0	TraesCS1D03G0719400,TraesCS1D03G0719500	4.02172	2.91769e-16	8.99554e-16	15.535	15.046	50
Chr1D	401958811	401958952	CK_peak_1542	42.4722	+	1	141	0	TraesCS1D03G0721300	3.47949	6.30175e-14	1.63902e-13	13.2005	12.7854	141
Chr1D	403829471	403829571	CK_peak_1543	29.4168	+	1	100	0	TraesCS1D03G0725500	3.66229	7.64138e-10	1.39532e-09	9.11683	8.85533	100
Chr1D	405170857	405171001	CK_peak_1544	116.623	+	1	144	0	TraesCS1D03G0728200	4.60837	7.42387e-37	7.81814e-36	36.1294	35.1069	144
Chr1D	405405138	405405304	CK_peak_1545	35.9547	+	1	166	0	TraesCS1D03G0729000	6.51005	6.83092e-12	1.50158e-11	11.1655	10.8235	166
Chr1D	405690339	405690549	CK_peak_1546	12.4902	+	2	31,44	0,166	TraesCS1D03G0730800	3.74687	0.000163406	0.000173812	3.78673	3.75992	210
Chr1D	405692477	405692527	CK_peak_1547	22.6302	+	1	50	0	TraesCS1D03G0730800	3.78404	1.03246e-07	1.54036e-07	6.98612	6.81238	50
Chr1D	405828242	405828317	CK_peak_1548	40.7294	+	1	75	0	TraesCS1D03G0731100	3.43045	2.2052e-13	5.48566e-13	12.6566	12.2608	75
Chr1D	407885817	407885992	CK_peak_1549	28.4719	+	1	175	0	TraesCS1D03G0736800	3.51751	1.51063e-09	2.68606e-09	8.82084	8.57088	175
Chr1D	408682517	408682617	CK_peak_1550	25.0756	+	1	100	0	TraesCS1D03G0737500LC,TraesCS1D03G0737600	4.79721	1.7561e-08	2.82805e-08	7.75545	7.54851	100
Chr1D	409749797	409750047	CK_peak_1551	67.258	+	1	250	0	TraesCS1D03G0740000	7.74835	1.2835e-21	5.66651e-21	20.8916	20.2467	250
Chr1D	409999451	409999676	CK_peak_1552	57.3183	+	1	225	0	TraesCS1D03G0741100	4.42022	1.54588e-18	5.56494e-18	17.8108	17.2545	225
Chr1D	413012240	413012415	CK_peak_1553	30.5064	+	1	175	0	TraesCS1D03G0749400	4.58902	3.47451e-10	6.55646e-10	9.45911	9.18333	175
Chr1D	414460773	414461640	CK_peak_1554	19.144	+	3	41,108,1	0,506,866	TraesCS1D03G0753700,TraesCS1D03G0753800LC	3.76286	1.3056e-06	1.72612e-06	5.88419	5.76293	867
Chr1D	417716041	417716091	CK_peak_1555	24.9947	+	1	50	0	TraesCS1D03G0763500	5.20085	1.86356e-08	2.9913e-08	7.72966	7.52414	50
Chr1D	420602570	420602770	CK_peak_1556	49.721	+	1	200	0	TraesCS1D03G0772900	6.37724	3.51457e-16	1.07769e-15	15.4541	14.9675	200
Chr1D	421851652	421851802	CK_peak_1557	17.1017	+	1	150	0	TraesCS1D03G0777100	4.08283	5.74704e-06	7.1099e-06	5.24056	5.14814	150
Chr1D	421855096	421855258	CK_peak_1558	118.039	+	1	162	0	TraesCS1D03G0777100	4.37928	2.70659e-37	2.92923e-36	36.5676	35.5332	162
Chr1D	421860995	421861195	CK_peak_1559	48.9398	+	1	200	0	TraesCS1D03G0777300	3.97091	6.12255e-16	1.85207e-15	15.2131	14.7323	200
Chr1D	421862660	421862760	CK_peak_1560	91.5911	+	1	100	0	TraesCS1D03G0777300	3.29716	3.82597e-29	2.68117e-28	28.4173	27.5717	100
Chr1D	422112265	422112352	CK_peak_1561	43.8151	+	1	87	0	TraesCS1D03G0777800	3.99559	2.40598e-14	6.46158e-14	13.6187	13.1897	87
Chr1D	422925251	422925551	CK_peak_1562	88.4339	+	1	300	0	TraesCS1D03G0780300	4.19992	3.59358e-28	2.3919e-27	27.4445	26.6213	300
Chr1D	425629147	425629308	CK_peak_1563	16.3954	+	2	19,31	0,130	TraesCS1D03G0789600	4.12925	9.59351e-06	1.16012e-05	5.01802	4.9355	161
Chr1D	425973808	425974083	CK_peak_1564	197.899	+	1	275	0	TraesCS1D03G0790100	5.05488	7.64939e-62	2.66924e-60	61.1164	59.5736	275
Chr1D	428569069	428569194	CK_peak_1565	26.5726	+	1	125	0	TraesCS1D03G0795000	4.00974	5.9583e-09	1.00196e-08	8.22488	7.99915	125
Chr1D	428572162	428572237	CK_peak_1566	21.7844	+	1	75	0	TraesCS1D03G0795100	3.99458	1.90743e-07	2.76856e-07	6.71955	6.55775	75
Chr1D	430003204	430003279	CK_peak_1567	20.2512	+	1	75	0	TraesCS1D03G0798800	4.00301	5.83937e-07	8.01265e-07	6.23363	6.09622	75
Chr1D	432093890	432094040	CK_peak_1568	100.385	+	1	150	0	TraesCS1D03G0803500	3.46505	7.40549e-32	6.04207e-31	31.1304	30.2188	150
Chr1D	435176921	435177221	CK_peak_1569	125.99	+	1	300	0	TraesCS1D03G0812300	4.52477	9.76384e-40	1.18354e-38	39.0104	37.9268	300
Chr1D	435177246	435177346	CK_peak_1570	20.2549	+	1	100	0	TraesCS1D03G0812300	3.57973	5.82406e-07	7.99235e-07	6.23477	6.09733	100
Chr1D	436386374	436386649	CK_peak_1571	79.5107	+	1	275	0	TraesCS1D03G0815500	4.30584	2.08639e-25	1.16114e-24	24.6806	23.9351	275
Chr1D	436393070	436393120	CK_peak_1572	20.1458	+	1	50	0	TraesCS1D03G0815700	3.53939	6.30391e-07	8.61982e-07	6.20039	6.0645	50
Chr1D	436398014	436398139	CK_peak_1573	79.696	+	1	125	0	TraesCS1D03G0815700	3.44661	1.82758e-25	1.02121e-24	24.7381	23.9909	125
Chr1D	440843658	440843783	CK_peak_1574	16.519	+	1	125	0	TraesCS1D03G0830200	4.39101	8.76812e-06	1.06487e-05	5.05709	4.9727	125
Chr1D	442358476	442358699	CK_peak_1575	28.8726	+	1	223	0	TraesCS1D03G0834800	3.98649	1.13104e-09	2.03459e-09	8.94652	8.69152	223
Chr1D	442533959	442534134	CK_peak_1576	26.0598	+	1	175	0	TraesCS1D03G0835500	3.75881	8.62768e-09	1.42957e-08	8.06411	7.84479	175
Chr1D	442896054	442896154	CK_peak_1577	16.0054	+	1	100	0	TraesCS1D03G0836300	4.07026	1.27642e-05	1.52015e-05	4.89401	4.81811	100
Chr1D	443615187	443615437	CK_peak_1578	111.897	+	1	250	0	TraesCS1D03G0838700	4.67042	2.11463e-35	2.06838e-34	34.6748	33.6844	250
Chr1D	443838547	443838597	CK_peak_1579	19.4546	+	1	50	0	TraesCS1D03G0839400	4.23419	1.04215e-06	1.39182e-06	5.98207	5.85642	50
Chr1D	446874689	446874764	CK_peak_1580	14.8695	+	1	75	0	TraesCS1D03G0848400	4.43156	2.91635e-05	3.3407e-05	4.53516	4.47616	75
Chr1D	446892822	446892922	CK_peak_1581	16.1176	+	1	100	0	TraesCS1D03G0848500	5.00848	1.17431e-05	1.40646e-05	4.93022	4.85187	100
Chr1D	446897815	446897965	CK_peak_1582	39.7219	+	1	150	0	TraesCS1D03G0848600	3.48372	4.54491e-13	1.10289e-12	12.3425	11.9575	150
Chr1D	447597297	447597372	CK_peak_1583	11.0062	+	1	75	0	TraesCS1D03G0851400,TraesCS1D03G0851600	5.51252	0.000473688	0.000486186	3.32451	3.3132	75
Chr1D	447765304	447765404	CK_peak_1584	17.8211	+	1	100	0	TraesCS1D03G0852300	3.69305	3.4089e-06	4.31819e-06	5.46739	5.3647	100
Chr1D	448065159	448065359	CK_peak_1585	48.2017	+	1	200	0	TraesCS1D03G0853400LC	4.42504	1.03926e-15	3.08921e-15	14.9833	14.5102	200
Chr1D	449745359	449745434	CK_peak_1586	11.0246	+	1	75	0	TraesCS1D03G0858400	6.47919	0.000467568	0.000480034	3.33015	3.31873	75
Chr1D	450055481	450055781	CK_peak_1587	156.18	+	1	300	0	TraesCS1D03G0859800	4.8871	5.03747e-49	9.66244e-48	48.2978	47.0149	300
Chr1D	450539146	450539196	CK_peak_1588	10.1691	+	1	50	0	TraesCS1D03G0861600LC,TraesCS1D03G0861700	3.73641	0.00085944	0.000868553	3.06578	3.0612	50
Chr1D	451173210	451173260	CK_peak_1589	24.434	+	1	50	0	TraesCS1D03G0863300	3.77527	2.78991e-08	4.41184e-08	7.55441	7.35538	50
Chr1D	451973492	451973657	CK_peak_1590	14.4845	+	1	165	0	TraesCS1D03G0865100	5.06755	3.86086e-05	4.36235e-05	4.41332	4.36028	165
Chr1D	452732428	452732578	CK_peak_1591	83.7111	+	1	150	0	TraesCS1D03G0866700	3.34905	1.03342e-26	6.31608e-26	25.9857	25.1996	150
Chr1D	453633166	453633260	CK_peak_1592	23.4458	+	1	94	0	TraesCS1D03G0868500	4.27151	5.71895e-08	8.75234e-08	7.24268	7.05788	94
Chr1D	454772579	454772629	CK_peak_1593	15.9101	+	1	50	0	TraesCS1D03G0873400LC	4.40435	1.36761e-05	1.62394e-05	4.86404	4.78943	50
Chr1D	454855749	454855916	CK_peak_1594	23.3776	+	1	167	0	TraesCS1D03G0874100	4.16836	6.01308e-08	9.17577e-08	7.2209	7.03736	167
Chr1D	455133385	455133560	CK_peak_1595	39.3128	+	1	175	0	TraesCS1D03G0875200	3.87036	6.10671e-13	1.4644e-12	12.2142	11.8343	175
Chr1D	455642284	455642434	CK_peak_1596	33.1072	+	1	150	0	TraesCS1D03G0876600	4.61298	5.30507e-11	1.08079e-10	10.2753	9.96626	150
Chr1D	455688443	455688643	CK_peak_1597	34.1116	+	1	200	0	TraesCS1D03G0876700	4.24644	2.5731e-11	5.3875e-11	10.5895	10.2686	200
Chr1D	455706381	455706531	CK_peak_1598	30.0604	+	1	150	0	TraesCS1D03G0876900	3.6498	4.79865e-10	8.93136e-10	9.31888	9.04908	150
Chr1D	455784632	455784825	CK_peak_1599	111.99	+	1	193	0	TraesCS1D03G0877800	4.90465	1.98042e-35	1.93959e-34	34.7032	33.7123	193
Chr1D	456728665	456728790	CK_peak_1600	37.041	+	1	125	0	TraesCS1D03G0880500	3.81531	3.1254e-12	7.07215e-12	11.5051	11.1504	125
Chr1D	458273738	458273863	CK_peak_1601	43.8168	+	1	125	0	TraesCS1D03G0884000LC,TraesCS1D03G0884100	4.08855	2.40238e-14	6.45418e-14	13.6194	13.1902	125
Chr1D	459140492	459140667	CK_peak_1602	20.6088	+	1	175	0	TraesCS1D03G0886700,TraesCS1D03G0886800LC	4.25632	4.49761e-07	6.25367e-07	6.34702	6.20387	175
Chr1D	460543298	460543473	CK_peak_1603	24.2123	+	1	175	0	TraesCS1D03G0889800	3.66971	3.2783e-08	5.14467e-08	7.48435	7.28864	175
Chr1D	462403329	462403454	CK_peak_1604	17.3427	+	1	125	0	TraesCS1D03G0896600	4.03708	4.82856e-06	6.01607e-06	5.31618	5.22069	125
Chr1D	462476155	462476330	CK_peak_1605	57.9655	+	1	175	0	TraesCS1D03G0897100	3.66681	9.72427e-19	3.55349e-18	18.0121	17.4493	175
Chr1D	463371305	463371455	CK_peak_1606	16.9206	+	1	150	0	TraesCS1D03G0902900	4.44561	6.5575e-06	8.06089e-06	5.18326	5.09362	150
Chr1D	463632543	463632643	CK_peak_1607	15.6856	+	1	100	0	TraesCS1D03G0904500	3.88877	1.6111e-05	1.89741e-05	4.79288	4.72184	100
Chr1D	463713696	463713796	CK_peak_1608	13.878	+	1	100	0	TraesCS1D03G0905000	4.58393	5.98862e-05	6.64197e-05	4.22267	4.1777	100
Chr1D	463718000	463718125	CK_peak_1609	13.528	+	1	125	0	TraesCS1D03G0905100	7.48634	7.71825e-05	8.46549e-05	4.11248	4.07235	125
Chr1D	464973974	464974099	CK_peak_1610	30.556	+	1	125	0	TraesCS1D03G0910800	3.84128	3.35158e-10	6.33469e-10	9.47475	9.19827	125
Chr1D	466775657	466775932	CK_peak_1611	50.96	+	1	275	0	TraesCS1D03G0919700,TraesCS1D03G0919800LC	5.5721	1.4474e-16	4.56586e-16	15.8394	15.3405	275
Chr1D	469095138	469095313	CK_peak_1612	133.038	+	1	175	0	TraesCS1D03G0931200	3.31147	6.63003e-42	8.94703e-41	41.1785	40.0483	175
Chr1D	469647965	469648040	CK_peak_1613	67.6712	+	1	75	0	TraesCS1D03G0931800	3.16406	9.54923e-22	4.2553e-21	21.02	20.3711	75
Chr1D	470544554	470544629	CK_peak_1614	11.6087	+	1	75	0	TraesCS1D03G0936700,TraesCS1D03G0936800LC	4.98164	0.000307613	0.000320213	3.51199	3.49456	75
Chr1D	471654607	471654732	CK_peak_1615	24.1826	+	1	125	0	TraesCS1D03G0940000	3.43585	3.34894e-08	5.25175e-08	7.47509	7.2797	125
Chr1D	472465197	472465372	CK_peak_1616	35.9899	+	1	175	0	TraesCS1D03G0942400	4.41535	6.65596e-12	1.46545e-11	11.1768	10.834	175
Chr1D	472465422	472465510	CK_peak_1617	33.8686	+	1	88	0	TraesCS1D03G0942400	3.53049	3.06309e-11	6.3758e-11	10.5138	10.1955	88
Chr1D	472703567	472703767	CK_peak_1618	42.9044	+	1	200	0	TraesCS1D03G0943900	4.9721	4.62768e-14	1.2148e-13	13.3346	12.9155	200
Chr1D	473037167	473037317	CK_peak_1619	38.9393	+	1	150	0	TraesCS1D03G0945700	3.62764	7.9899e-13	1.8972e-12	12.0975	11.7219	150
Chr1D	473234353	473234490	CK_peak_1620	55.0357	+	1	137	0	TraesCS1D03G0947000	3.76861	7.89818e-18	2.70772e-17	17.1025	16.5674	137
Chr1D	474262620	474262770	CK_peak_1621	15.7583	+	1	150	0	TraesCS1D03G0951000	4.47942	1.52844e-05	1.80424e-05	4.81575	4.74371	150
Chr1D	474505589	474505814	CK_peak_1622	85.8598	+	1	225	0	TraesCS1D03G0951700	3.87796	2.25491e-27	1.42441e-26	26.6469	25.8464	225
Chr1D	475219476	475219551	CK_peak_1623	47.7793	+	1	75	0	TraesCS1D03G0954200	4.02806	1.40634e-15	4.14002e-15	14.8519	14.383	75
Chr1D	475689826	475689876	CK_peak_1624	16.9404	+	1	50	0	TraesCS1D03G0954900	4.66247	6.46426e-06	7.9514e-06	5.18948	5.09956	50
Chr1D	475915932	475916032	CK_peak_1625	14.8023	+	1	100	0	TraesCS1D03G0955100	7.91398	3.06373e-05	3.50006e-05	4.51375	4.45592	100
Chr1D	476290975	476291125	CK_peak_1626	76.5291	+	1	150	0	TraesCS1D03G0956000	3.36422	1.73517e-24	9.17143e-24	23.7607	23.0376	150
Chr1D	476700853	476701021	CK_peak_1627	73.5626	+	1	168	0	TraesCS1D03G0958100	4.10814	1.43626e-23	7.16906e-23	22.8428	22.1445	168
Chr1D	478141094	478141206	CK_peak_1628	40.707	+	1	112	0	TraesCS1D03G0963600	3.35932	2.24077e-13	5.57141e-13	12.6496	12.254	112
Chr1D	479187546	479187671	CK_peak_1629	9.64516	+	1	125	0	TraesCS1D03G0969000	3.75513	0.00124428	0.00124887	2.90508	2.90348	125
Chr1D	481429786	481429886	CK_peak_1630	26.2578	+	1	100	0	TraesCS1D03G0978100	3.92129	7.4749e-09	1.24628e-08	8.12639	7.90438	100
Chr1D	481431371	481431560	CK_peak_1631	282.142	+	1	189	0	TraesCS1D03G0978100	4.04229	9.4059e-88	1.1661e-85	87.0266	84.9333	189
Chr1D	481665544	481665644	CK_peak_1632	21.7237	+	1	100	0	TraesCS1D03G0979300	5.07996	1.99442e-07	2.8874e-07	6.70018	6.53949	100
Chr1D	481713958	481714108	CK_peak_1633	12.8085	+	1	150	0	TraesCS1D03G0979400	5.10028	0.000129837	0.000139399	3.8866	3.85574	150
Chr1D	483052893	483053093	CK_peak_1634	40.4586	+	1	200	0	TraesCS1D03G0984900	3.78623	2.67651e-13	6.61815e-13	12.5724	12.1793	200
Chr1D	483130942	483131017	CK_peak_1635	186.952	+	1	75	0	TraesCS1D03G0985100	4.32166	1.77332e-58	5.27123e-57	57.7512	56.2781	75
Chr1D	483595488	483595682	CK_peak_1636	43.1276	+	1	194	0	TraesCS1D03G0986600	5.9209	3.93827e-14	1.04063e-13	13.4047	12.9827	194
Chr1D	484125839	484126014	CK_peak_1637	41.5735	+	1	175	0	TraesCS1D03G0989200	3.81281	1.20214e-13	3.05575e-13	12.92	12.5149	175
Chr1D	484914604	484914729	CK_peak_1638	13.0459	+	1	125	0	TraesCS1D03G0993600	4.22128	0.000109483	0.000118246	3.96065	3.92721	125
Chr1D	486360235	486360435	CK_peak_1639	31.1572	+	1	200	0	TraesCS1D03G0998500	4.29124	2.1713e-10	4.17583e-10	9.66328	9.37926	200
Chr1D	488559715	488560039	CK_peak_1640	57.6992	+	1	324	0	TraesCS1D03G1010400LC	4.08878	1.17709e-18	4.27367e-18	17.9292	17.3692	324
Chr1D	488913003	488913178	CK_peak_1641	24.7202	+	1	175	0	TraesCS1D03G1013800	3.98825	2.27081e-08	3.61797e-08	7.64382	7.44153	175
Chr1D	489820023	489820248	CK_peak_1642	45.8494	+	1	225	0	TraesCS1D03G1018000	3.99756	5.61187e-15	1.57743e-14	14.2509	13.8021	225
Chr1D	491132555	491132730	CK_peak_1643	17.2452	+	1	175	0	TraesCS1D03G1023000	5.96415	5.18417e-06	6.43705e-06	5.28532	5.19131	175
Chr1D	491617638	491617713	CK_peak_1644	29.5066	+	1	75	0	TraesCS1D03G1026100	3.51237	7.15846e-10	1.31111e-09	9.14518	8.88236	75
Chr1D	493762552	493762727	CK_peak_1645	47.9506	+	1	175	0	TraesCS1D03G1033000LC	3.39224	1.24287e-15	3.67653e-15	14.9056	14.4346	175
Chr1D	493886866	493887016	CK_peak_1646	23.0005	+	1	150	0	TraesCS1D03G1033800	5.13269	7.90244e-08	1.1917e-07	7.10224	6.92383	150
Chr1D	494460870	494460920	CK_peak_1647	14.6911	+	1	50	0	TraesCS1D03G1034800	4.14789	3.3195e-05	3.78036e-05	4.47893	4.42247	50
Chr1D	495233359	495233559	CK_peak_1648	93.2531	+	1	200	0	TraesCS1D03G1038000	4.09074	1.17071e-29	8.47279e-29	28.9316	28.072	200
Chr1D	496485270	496485363	CK_peak_1649	16.9873	+	1	93	0	TraesCS1D03G1040900	8.36356	6.24536e-06	7.69705e-06	5.20444	5.11368	93
Chr1D	496888991	496889128	CK_peak_1650	43.8721	+	1	137	0	TraesCS1D03G1042100	4.20377	2.30832e-14	6.21133e-14	13.6367	13.2068	137
Chr1D	496941203	496941303	CK_peak_1651	12.6473	+	1	100	0	TraesCS1D03G1042400LC	4.74081	0.000145869	0.000155877	3.83604	3.80722	100
Chr1D	497662036	497662261	CK_peak_1652	49.4718	+	1	225	0	TraesCS1D03G1045600	6.16958	4.19481e-16	1.28087e-15	15.3773	14.8925	225
Chr1D	21436	21511	CK_peak_1653	22.5427	-	1	75	0	TraesCS1D03G0000100,TraesCS1D03G0000200LC	3.68993	1.10066e-07	1.63667e-07	6.95835	6.78604	75
Chr1D	66998	67148	CK_peak_1654	31.2208	-	1	150	0	TraesCS1D03G0001100	3.45694	2.07354e-10	3.99589e-10	9.68329	9.39839	150
Chr1D	171599	171949	CK_peak_1655	91.4517	-	1	350	0	TraesCS1D03G0001800	4.69821	4.22786e-29	2.9533e-28	28.3739	27.5297	350
Chr1D	2617160	2617335	CK_peak_1656	48.917	-	1	175	0	TraesCS1D03G0008100	4.16842	6.22387e-16	1.8816e-15	15.2059	14.7255	175
Chr1D	6769013	6769263	CK_peak_1657	42.0591	-	1	250	0	TraesCS1D03G0024600	4.05335	8.48853e-14	2.18246e-13	13.0712	12.6611	250
Chr1D	7896241	7896341	CK_peak_1658	89.6746	-	1	100	0	TraesCS1D03G0032700	5.10709	1.49079e-28	1.01216e-27	27.8266	26.9948	100
Chr1D	8337888	8338113	CK_peak_1659	177.667	-	1	225	0	TraesCS1D03G0036000	3.67237	1.2508e-55	3.28853e-54	54.9028	53.483	225
Chr1D	10666963	10667188	CK_peak_1660	98.9897	-	1	225	0	TraesCS1D03G0046000	4.14194	1.99341e-31	1.589e-30	30.7004	29.7989	225
Chr1D	10841085	10841285	CK_peak_1661	54.7888	-	1	200	0	TraesCS1D03G0047600	4.30197	9.41457e-18	3.21313e-17	17.0262	16.4931	200
Chr1D	15053692	15053817	CK_peak_1662	37.3068	-	1	125	0	TraesCS1D03G0064100	3.5172	2.57945e-12	5.88217e-12	11.5885	11.2305	125
Chr1D	17885266	17885316	CK_peak_1663	12.4458	-	1	50	0	TraesCS1D03G0070400	7.19146	0.000168791	0.00017924	3.77265	3.74657	50
Chr1D	20670879	20671028	CK_peak_1664	21.5644	-	1	149	0	TraesCS1D03G0080000	4.78195	2.24064e-07	3.22457e-07	6.64963	6.49153	149
Chr1D	21687974	21688149	CK_peak_1665	31.1927	-	1	175	0	TraesCS1D03G0083900	3.64358	2.11512e-10	4.07446e-10	9.67467	9.38993	175
Chr1D	25153183	25153308	CK_peak_1666	60.089	-	1	125	0	TraesCS1D03G0090700	3.54256	2.1348e-19	8.15472e-19	18.6706	18.0886	125
Chr1D	31249337	31249412	CK_peak_1667	24.8133	-	1	75	0	TraesCS1D03G0103800	3.44131	2.12302e-08	3.39207e-08	7.67305	7.46953	75
Chr1D	33901924	33901974	CK_peak_1668	10.9711	-	1	50	0	TraesCS1D03G0111200	3.52212	0.000485687	0.000498166	3.31364	3.30263	50
Chr1D	37396655	37396805	CK_peak_1669	56.8017	-	1	150	0	TraesCS1D03G0118800,TraesCS1D03G0118900LC	3.58307	2.24073e-18	7.96107e-18	17.6496	17.099	150
Chr1D	37397216	37397391	CK_peak_1670	16.2378	-	1	175	0	TraesCS1D03G0119000	4.21167	1.07645e-05	1.29403e-05	4.96801	4.88806	175
Chr1D	37399424	37399524	CK_peak_1671	60.8931	-	1	100	0	TraesCS1D03G0119200	3.79607	1.20273e-19	4.67034e-19	18.9198	18.3307	100
Chr1D	39356138	39356238	CK_peak_1672	13.2114	-	1	100	0	TraesCS1D03G0122300	6.24828	9.71492e-05	0.000105432	4.01256	3.97703	100
Chr1D	39646154	39646279	CK_peak_1673	20.5273	-	1	125	0	TraesCS1D03G0122800	4.48213	4.77156e-07	6.61709e-07	6.32134	6.17933	125
Chr1D	44416535	44416710	CK_peak_1674	12.7543	-	1	175	0	TraesCS1D03G0132800	6.01479	0.000135056	0.000144737	3.86949	3.83942	175
Chr1D	58152768	58152968	CK_peak_1675	24.6538	-	1	200	0	TraesCS1D03G0169000	4.99853	2.3801e-08	3.78853e-08	7.62341	7.42153	200
Chr1D	58891736	58891911	CK_peak_1676	103.205	-	1	175	0	TraesCS1D03G0170500	4.17548	1.00596e-32	8.55544e-32	31.9974	31.0678	175
Chr1D	61791979	61792154	CK_peak_1677	33.1758	-	1	175	0	TraesCS1D03G0174800	5.09113	5.04869e-11	1.03062e-10	10.2968	9.9869	175
Chr1D	63613049	63613174	CK_peak_1678	22.8527	-	1	125	0	TraesCS1D03G0180500	3.95462	8.793e-08	1.32025e-07	7.05586	6.87934	125
Chr1D	65145739	65145939	CK_peak_1679	179.622	-	1	200	0	TraesCS1D03G0182800	4.01518	3.14207e-56	8.48026e-55	55.5028	54.0716	200
Chr1D	66210788	66211188	CK_peak_1680	104.927	-	1	400	0	TraesCS1D03G0185400	5.90666	2.96249e-33	2.59329e-32	32.5283	31.5861	400
Chr1D	68097886	68097961	CK_peak_1681	42.6221	-	1	75	0	TraesCS1D03G0188800	3.3766	5.66156e-14	1.47729e-13	13.2471	12.8305	75
Chr1D	69396913	69397013	CK_peak_1682	13.9466	-	1	100	0	TraesCS1D03G0190000	3.78521	5.69952e-05	6.33377e-05	4.24416	4.19834	100
Chr1D	70194408	70194558	CK_peak_1683	57.7315	-	1	150	0	TraesCS1D03G0192200	4.11827	1.14994e-18	4.1791e-18	17.9393	17.3789	150
Chr1D	72302723	72302773	CK_peak_1684	15.3954	-	1	50	0	TraesCS1D03G0195400	3.66976	1.99109e-05	2.32019e-05	4.70091	4.63448	50
Chr1D	72797681	72797831	CK_peak_1685	20.4094	-	1	150	0	TraesCS1D03G0196800	4.49564	5.20526e-07	7.18066e-07	6.28356	6.14384	150
Chr1D	76340906	76341056	CK_peak_1686	48.6395	-	1	150	0	TraesCS1D03G0203400	3.46769	7.59464e-16	2.28064e-15	15.1195	14.6419	150
Chr1D	78289987	78290087	CK_peak_1687	19.0438	-	1	100	0	TraesCS1D03G0206700	4.37131	1.40378e-06	1.85031e-06	5.8527	5.73276	100
Chr1D	78839908	78840033	CK_peak_1688	27.6603	-	1	125	0	TraesCS1D03G0207500	3.7292	2.72052e-09	4.71423e-09	8.56535	8.32659	125
Chr1D	78850284	78850384	CK_peak_1689	11.6915	-	1	100	0	TraesCS1D03G0207600	4.3848	0.00028997	0.000302342	3.53765	3.5195	100
Chr1D	80547241	80547416	CK_peak_1690	11.5704	-	1	175	0	TraesCS1D03G0212300	5.52775	0.000316094	0.000328816	3.50018	3.48305	175
Chr1D	82613943	82614166	CK_peak_1691	33.643	-	2	14111	0,112	TraesCS1D03G0218700	3.49594	3.60751e-11	7.45506e-11	10.4428	10.1275	223
Chr1D	87950810	87950935	CK_peak_1692	32.5771	-	1	125	0	TraesCS1D03G0230600	3.75599	7.78125e-11	1.56065e-10	10.109	9.80669	125
Chr1D	88359025	88359075	CK_peak_1693	35.5658	-	1	50	0	TraesCS1D03G0231100	3.30584	9.05057e-12	1.96627e-11	11.0433	10.7064	50
Chr1D	88367901	88368026	CK_peak_1694	32.4505	-	1	125	0	TraesCS1D03G0231200	3.91712	8.52082e-11	1.70383e-10	10.0695	9.76857	125
Chr1D	90088729	90089054	CK_peak_1695	100.864	-	1	325	0	TraesCS1D03G0234200,TraesCS1D03G0234400	7.28775	5.27809e-32	4.33417e-31	31.2775	30.3631	325
Chr1D	92283760	92283885	CK_peak_1696	28.5284	-	1	125	0	TraesCS1D03G0237300,TraesCS1D03G0237400	4.76615	1.44991e-09	2.58291e-09	8.83866	8.58789	125
Chr1D	93788999	93789099	CK_peak_1697	27.0417	-	1	100	0	TraesCS1D03G0241700	4.94903	4.25124e-09	7.23841e-09	8.37148	8.14036	100
Chr1D	96286710	96286835	CK_peak_1698	16.1179	-	1	125	0	TraesCS1D03G0244700	3.91373	1.17391e-05	1.40609e-05	4.93036	4.85199	125
Chr1D	96304970	96305245	CK_peak_1699	354.469	-	1	275	0	TraesCS1D03G0245000	5.47583	5.93944e-110	1.96892e-107	109.226	106.706	275
Chr1D	96311266	96311316	CK_peak_1700	15.5902	-	1	50	0	TraesCS1D03G0245000	5.81197	1.72776e-05	2.02713e-05	4.76252	4.69312	50
Chr1D	99872139	99872264	CK_peak_1701	35.7544	-	1	125	0	TraesCS1D03G0248800	3.44807	7.89392e-12	1.7253e-11	11.1027	10.7631	125
Chr1D	101090545	101090720	CK_peak_1702	25.7594	-	1	175	0	TraesCS1D03G0250900	4.84428	1.0714e-08	1.76053e-08	7.97005	7.75436	175
Chr1D	101100078	101100203	CK_peak_1703	11.0708	-	1	125	0	TraesCS1D03G0251100	6.50661	0.000452519	0.000464896	3.34436	3.33264	125
Chr1D	103485710	103485810	CK_peak_1704	23.9328	-	1	100	0	TraesCS1D03G0253200	3.86801	4.01865e-08	6.24481e-08	7.39592	7.20448	100
Chr1D	104260378	104260503	CK_peak_1705	20.0626	-	1	125	0	TraesCS1D03G0255400	4.21614	6.69589e-07	9.13206e-07	6.17419	6.03943	125
Chr1D	104302493	104302643	CK_peak_1706	20.4179	-	1	150	0	TraesCS1D03G0255900	5.56854	5.17236e-07	7.1385e-07	6.28631	6.14639	150
Chr1D	104445689	104445864	CK_peak_1707	32.696	-	1	175	0	TraesCS1D03G0256100	4.08081	7.13285e-11	1.43722e-10	10.1467	9.84248	175
Chr1D	106625007	106625075	CK_peak_1708	25.5092	-	1	68	0	TraesCS1D03G0258500,TraesCS1D03G0258600LC	4.6086	1.28238e-08	2.09392e-08	7.89198	7.67904	68
Chr1D	107708163	107708288	CK_peak_1709	35.1094	-	1	125	0	TraesCS1D03G0261100	4.5119	1.25452e-11	2.6978e-11	10.9015	10.569	125
Chr1D	109366830	109367005	CK_peak_1710	34.0267	-	1	175	0	TraesCS1D03G0263600	5.63516	2.73313e-11	5.71394e-11	10.5633	10.2431	175
Chr1D	109450163	109450388	CK_peak_1711	63.4741	-	1	225	0	TraesCS1D03G0263800	4.12119	1.9031e-20	7.80537e-20	19.7205	19.1076	225
Chr1D	110340939	110341164	CK_peak_1712	153.626	-	1	225	0	TraesCS1D03G0265000	3.6829	3.07481e-48	5.67649e-47	47.5122	46.2459	225
Chr1D	111372271	111372371	CK_peak_1713	18.2878	-	1	100	0	TraesCS1D03G0266700	3.52551	2.43206e-06	3.12491e-06	5.61403	5.50516	100
Chr1D	112923348	112923548	CK_peak_1714	100.705	-	1	200	0	TraesCS1D03G0268800	3.63847	5.90852e-32	4.83883e-31	31.2285	30.3153	200
Chr1D	114127160	114127310	CK_peak_1715	14.5981	-	1	150	0	TraesCS1D03G0273200	3.68396	3.5517e-05	4.03215e-05	4.44956	4.39446	150
Chr1D	115307180	115307355	CK_peak_1716	109.229	-	1	175	0	TraesCS1D03G0276000	4.17716	1.4013e-34	1.31417e-33	33.8535	32.8813	175
Chr1D	119066549	119066724	CK_peak_1717	29.77	-	1	175	0	TraesCS1D03G0283800	4.2525	5.9167e-10	1.0923e-09	9.22792	8.96166	175
Chr1D	121949530	121949680	CK_peak_1718	32.1292	-	1	150	0	TraesCS1D03G0285900	4.07165	1.07458e-10	2.12891e-10	9.96876	9.67184	150
Chr1D	121953273	121953373	CK_peak_1719	12.0971	-	1	100	0	TraesCS1D03G0285900	4.06556	0.000216877	0.000228253	3.66379	3.64158	100
Chr1D	124447369	124447601	CK_peak_1720	55.0696	-	2	2123	0,109	TraesCS1D03G0288300	4.1818	7.70954e-18	2.64483e-17	17.113	16.5776	232
Chr1D	126149734	126149809	CK_peak_1721	21.2947	-	1	75	0	TraesCS1D03G0290300	3.56902	2.72847e-07	3.88736e-07	6.56408	6.41035	75
Chr1D	127880012	127880137	CK_peak_1722	21.7206	-	1	125	0	TraesCS1D03G0292800	4.9239	1.999e-07	2.89375e-07	6.69919	6.53854	125
Chr1D	129643102	129643327	CK_peak_1723	61.8361	-	1	225	0	TraesCS1D03G0294500	4.19385	6.12057e-20	2.42927e-19	19.2132	18.6145	225
Chr1D	130922128	130922303	CK_peak_1724	33.7609	-	1	175	0	TraesCS1D03G0296000	4.17877	3.30818e-11	6.87001e-11	10.4804	10.163	175
Chr1D	135846185	135846335	CK_peak_1725	39.8013	-	1	150	0	TraesCS1D03G0298700	4.12108	4.29108e-13	1.04378e-12	12.3674	11.9814	150
Chr1D	135853539	135853589	CK_peak_1726	10.6851	-	1	50	0	TraesCS1D03G0298700	6.31382	0.000595979	0.00060737	3.22477	3.21655	50
Chr1D	143007753	143007953	CK_peak_1727	58.7986	-	1	200	0	TraesCS1D03G0304300	4.97131	5.37468e-19	1.99461e-18	18.2696	17.7001	200
Chr1D	144654933	144655133	CK_peak_1728	129.516	-	1	200	0	TraesCS1D03G0307200	5.02678	8.06836e-41	1.02786e-39	40.0932	38.9881	200
Chr1D	151570226	151570482	CK_peak_1729	45.1548	-	2	97,78	0,178	TraesCS1D03G0315600	4.46702	9.2016e-15	2.55304e-14	14.0361	13.5929	256
Chr1D	158231123	158231173	CK_peak_1730	12.0399	-	1	50	0	TraesCS1D03G0318700	3.86793	0.000225929	0.000237485	3.64603	3.62436	50
Chr1D	160967669	160968069	CK_peak_1731	109.83	-	1	400	0	TraesCS1D03G0322000	4.09221	9.14533e-35	8.66732e-34	34.0388	33.0621	400
Chr1D	162813580	162813855	CK_peak_1732	87.1561	-	1	275	0	TraesCS1D03G0323000	4.22497	8.95678e-28	5.79966e-27	27.0478	26.2366	275
Chr1D	167299150	167299325	CK_peak_1733	30.4716	-	1	175	0	TraesCS1D03G0328100	5.19545	3.5637e-10	6.71646e-10	9.4481	9.17286	175
Chr1D	169689230	169689505	CK_peak_1734	44.9733	-	1	275	0	TraesCS1D03G0331700	4.1407	1.04823e-14	2.89521e-14	13.9795	13.5383	275
Chr1D	179244047	179244172	CK_peak_1735	16.7529	-	1	125	0	TraesCS1D03G0337900	4.16897	7.40537e-06	9.05496e-06	5.13045	5.04311	125
Chr1D	185829984	185830334	CK_peak_1736	108.084	-	1	350	0	TraesCS1D03G0344500	4.57549	3.1463e-34	2.90775e-33	33.5022	32.5364	350
Chr1D	191247088	191247213	CK_peak_1737	13.1616	-	1	125	0	TraesCS1D03G0347900	5.1994	0.000100705	0.000109136	3.99695	3.96203	125
Chr1D	194269821	194269996	CK_peak_1738	42.3414	-	1	175	0	TraesCS1D03G0351300	3.5995	6.9269e-14	1.79457e-13	13.1595	12.746	175
Chr1D	195353335	195353410	CK_peak_1739	15.4296	-	1	75	0	TraesCS1D03G0352300	4.27384	1.94174e-05	2.26581e-05	4.71181	4.64478	75
Chr1D	197941711	197941786	CK_peak_1740	25.2834	-	1	75	0	TraesCS1D03G0357200	4.15825	1.5103e-08	2.44875e-08	7.82094	7.61106	75
Chr1D	199230541	199230716	CK_peak_1741	44.3125	-	1	175	0	TraesCS1D03G0359200	3.51114	1.68399e-14	4.5774e-14	13.7737	13.3394	175
Chr1D	199536908	199537008	CK_peak_1742	16.1961	-	1	100	0	TraesCS1D03G0360000	8.33546	1.10948e-05	1.33195e-05	4.95488	4.87551	100
Chr1D	202663013	202663163	CK_peak_1743	112.167	-	1	150	0	TraesCS1D03G0365400	3.94575	1.74416e-35	1.71592e-34	34.7584	33.7655	150
Chr1D	206005842	206006017	CK_peak_1744	10.0107	-	1	175	0	TraesCS1D03G0372000,TraesCS1D03G0372100LC	5.07063	0.000962114	0.000969361	3.01677	3.01351	175
Chr1D	206038720	206038770	CK_peak_1745	20.9103	-	1	50	0	TraesCS1D03G0372600LC	9.06033	3.6107e-07	5.07415e-07	6.44241	6.29464	50
Chr1D	206765700	206765825	CK_peak_1746	18.8431	-	1	125	0	TraesCS1D03G0375700	4.17373	1.62529e-06	2.12648e-06	5.78907	5.67234	125
Chr1D	208190847	208191272	CK_peak_1747	185.417	-	1	425	0	TraesCS1D03G0377600,TraesCS1D03G0377700	4.86279	5.29885e-58	1.52745e-56	57.2758	55.816	425
Chr1D	210975609	210975859	CK_peak_1748	97.2254	-	1	250	0	TraesCS1D03G0384800	5.66923	7.01977e-31	5.39811e-30	30.1537	29.2678	250
Chr1D	211111675	211111775	CK_peak_1749	12.8531	-	1	100	0	TraesCS1D03G0385400	4.20469	0.000125772	0.000135158	3.90042	3.86916	100
Chr1D	211546085	211546260	CK_peak_1750	12.7705	-	1	175	0	TraesCS1D03G0386300,TraesCS1D03G0386600LC	4.25709	0.000133461	0.000143119	3.87464	3.8443	175
Chr1D	214375325	214375425	CK_peak_1751	41.8294	-	1	100	0	TraesCS1D03G0390900	3.54284	9.99528e-14	2.55907e-13	13.0002	12.5919	100
Chr1D	221085444	221085594	CK_peak_1752	38.1603	-	1	150	0	TraesCS1D03G0402800	5.00535	1.39827e-12	3.2553e-12	11.8544	11.4874	150
Chr1D	221571787	221571987	CK_peak_1753	170.508	-	1	200	0	TraesCS1D03G0403000	3.97687	2.00254e-53	4.69795e-52	52.6984	51.3281	200
Chr1D	221647968	221648168	CK_peak_1754	104.752	-	1	200	0	TraesCS1D03G0403900	3.97847	3.35335e-33	2.92703e-32	32.4745	31.5336	200
Chr1D	223556378	223556553	CK_peak_1755	106.143	-	1	175	0	TraesCS1D03G0405500	3.73816	1.24918e-33	1.11592e-32	32.9034	31.9524	175
Chr1D	224683456	224683631	CK_peak_1756	29.5141	-	1	175	0	TraesCS1D03G0407300	4.25862	7.11638e-10	1.3043e-09	9.14774	8.88462	175
Chr1D	227223054	227223229	CK_peak_1757	31.2962	-	1	175	0	TraesCS1D03G0411600	4.44027	1.96347e-10	3.79239e-10	9.70698	9.42109	175
Chr1D	238272849	238272999	CK_peak_1758	31.7499	-	1	150	0	TraesCS1D03G0424100	3.51546	1.41568e-10	2.76908e-10	9.84903	9.55766	150
Chr1D	239940859	239941209	CK_peak_1759	92.8185	-	1	350	0	TraesCS1D03G0428100	5.09858	1.59577e-29	1.14513e-28	28.797	27.9411	350
Chr1D	240686750	240686925	CK_peak_1760	33.246	-	1	175	0	TraesCS1D03G0429500	3.66351	4.79657e-11	9.81666e-11	10.3191	10.008	175
Chr1D	240929320	240929495	CK_peak_1761	39.334	-	1	175	0	TraesCS1D03G0429700	4.57449	6.01396e-13	1.44307e-12	12.2208	11.8407	175
Chr1D	241300550	241300750	CK_peak_1762	24.974	-	1	200	0	TraesCS1D03G0430300LC	4.39211	1.89167e-08	3.03451e-08	7.72315	7.51791	200
Chr1D	242741614	242741714	CK_peak_1763	13.046	-	1	100	0	TraesCS1D03G0432300	4.23563	0.00010947	0.000118239	3.96071	3.92724	100
Chr1D	247809228	247809428	CK_peak_1764	69.4958	-	1	200	0	TraesCS1D03G0443000	4.78917	2.60061e-22	1.20135e-21	21.5849	20.9203	200
Chr1D	249253176	249253226	CK_peak_1765	16.2742	-	1	50	0	TraesCS1D03G0445800	8.33545	1.04823e-05	1.2618e-05	4.97954	4.89901	50
Chr1D	251734651	251734726	CK_peak_1766	22.1752	-	1	75	0	TraesCS1D03G0450600	3.61217	1.43675e-07	2.1115e-07	6.84262	6.67541	75
Chr1D	251993623	251993673	CK_peak_1767	14.4786	-	1	50	0	TraesCS1D03G0450900	3.57686	3.87862e-05	4.38047e-05	4.41132	4.35848	50
Chr1D	251993698	251993748	CK_peak_1768	19.7894	-	1	50	0	TraesCS1D03G0450900	3.3527	8.16614e-07	1.10356e-06	6.08798	5.95721	50
Chr1D	251997188	251997338	CK_peak_1769	15.1062	-	1	150	0	TraesCS1D03G0450900	4.82645	2.45857e-05	2.83527e-05	4.60932	4.54741	150
Chr1D	254294388	254294588	CK_peak_1770	72.4544	-	1	200	0	TraesCS1D03G0455500	4.34743	3.15094e-23	1.54547e-22	22.5016	21.8109	200
Chr1D	255787110	255787335	CK_peak_1771	62.7448	-	1	225	0	TraesCS1D03G0458800	3.78695	3.19754e-20	1.29404e-19	19.4952	18.8881	225
Chr1D	259918272	259918573	CK_peak_1772	21.8586	-	2	212,13	0,288	TraesCS1D03G0477800	6.62556	1.80509e-07	2.62977e-07	6.7435	6.58008	301
Chr1D	261142648	261142723	CK_peak_1773	15.2004	-	1	75	0	TraesCS1D03G0479700	4.33052	2.29513e-05	2.65603e-05	4.63919	4.57577	75
Chr1D	271456058	271456796	CK_peak_1774	104.453	-	2	11214	0,524	TraesCS1D03G0492500	4.96804	4.1615e-33	3.60151e-32	32.3808	31.4435	738
Chr1D	272793592	272793742	CK_peak_1775	16.0506	-	1	150	0	TraesCS1D03G0496200	5.77624	1.23387e-05	1.47328e-05	4.90873	4.83171	150
Chr1D	275037276	275037476	CK_peak_1776	131.757	-	1	200	0	TraesCS1D03G0498000	4.09964	1.64826e-41	2.17424e-40	40.783	39.6627	200
Chr1D	277787826	277787876	CK_peak_1777	19.7499	-	1	50	0	TraesCS1D03G0499900	4.23876	8.40468e-07	1.13419e-06	6.07548	5.94532	50
Chr1D	280013194	280013369	CK_peak_1778	38.4133	-	1	175	0	TraesCS1D03G0503600	4.04678	1.16674e-12	2.7317e-12	11.933	11.5636	175
Chr1D	281182189	281182239	CK_peak_1779	9.99684	-	1	50	0	TraesCS1D03G0504400	3.71492	0.000971577	0.000978701	3.01252	3.00935	50
Chr1D	282880562	282880687	CK_peak_1780	26.3187	-	1	125	0	TraesCS1D03G0507100	3.29883	7.15472e-09	1.19473e-08	8.14541	7.92273	125
Chr1D	284054696	284054771	CK_peak_1781	117.903	-	1	75	0	TraesCS1D03G0507800	3.66795	2.98362e-37	3.21763e-36	36.5253	35.4925	75
Chr1D	284945227	284945402	CK_peak_1782	60.8819	-	1	175	0	TraesCS1D03G0508800	3.88942	1.21242e-19	4.70677e-19	18.9163	18.3273	175
Chr1D	286226560	286226810	CK_peak_1783	193.485	-	1	250	0	TraesCS1D03G0510100	5.10655	1.75008e-60	5.69018e-59	59.7569	58.2449	250
Chr1D	286271133	286271308	CK_peak_1784	24.7346	-	1	175	0	TraesCS1D03G0510400	3.28272	2.2474e-08	3.58217e-08	7.64832	7.44585	175
Chr1D	286273948	286274098	CK_peak_1785	14.5434	-	1	150	0	TraesCS1D03G0510400	3.83513	3.69811e-05	4.18808e-05	4.43202	4.37799	150
Chr1D	286949421	286949471	CK_peak_1786	13.3992	-	1	50	0	TraesCS1D03G0511300	7.41682	8.4774e-05	9.25619e-05	4.07174	4.03357	50
Chr1D	286949496	286949696	CK_peak_1787	41.2481	-	1	200	0	TraesCS1D03G0511300	4.26785	1.52066e-13	3.82901e-13	12.818	12.4169	200
Chr1D	287698273	287698448	CK_peak_1788	46.8997	-	1	175	0	TraesCS1D03G0512000,TraesCS1D03G0512100LC	7.73603	2.64093e-15	7.61707e-15	14.5782	14.1182	175
Chr1D	289387017	289387167	CK_peak_1789	38.6316	-	1	150	0	TraesCS1D03G0514300,TraesCS1D03G0514400LC	3.41928	9.97862e-13	2.34821e-12	12.0009	11.6293	150
Chr1D	294717306	294717406	CK_peak_1790	9.93307	-	1	100	0	TraesCS1D03G0521900	4.86216	0.00101676	0.00102293	2.99278	2.99015	100
Chr1D	301313593	301313893	CK_peak_1791	50.3276	-	1	300	0	TraesCS1D03G0535000	4.28038	2.27432e-16	7.07779e-16	15.6431	15.1501	300
Chr1D	303847845	303848045	CK_peak_1792	98.989	-	1	200	0	TraesCS1D03G0539300	4.9067	1.99544e-31	1.58978e-30	30.7	29.7987	200
Chr1D	304238092	304238317	CK_peak_1793	27.7885	-	1	225	0	TraesCS1D03G0539400,TraesCS1D03G0539600LC	4.75375	2.47851e-09	4.31349e-09	8.60581	8.36517	225
Chr1D	304246045	304246145	CK_peak_1794	27.4087	-	1	100	0	TraesCS1D03G0539800	4.70324	3.26274e-09	5.61235e-09	8.48642	8.25086	100
Chr1D	304682953	304683053	CK_peak_1795	56.247	-	1	100	0	TraesCS1D03G0540200	4.39535	3.33286e-18	1.16941e-17	17.4772	16.932	100
Chr1D	305309831	305309981	CK_peak_1796	19.602	-	1	150	0	TraesCS1D03G0541900	5.1582	9.36645e-07	1.25663e-06	6.02843	5.90079	150
Chr1D	305490146	305490346	CK_peak_1797	77.4205	-	1	200	0	TraesCS1D03G0542400	4.01253	9.23428e-25	4.9443e-24	24.0346	23.3059	200
Chr1D	309045593	309045643	CK_peak_1798	83.3708	-	1	50	0	TraesCS1D03G0546200	3.12818	1.31776e-26	7.99625e-26	25.8802	25.0971	50
Chr1D	309048399	309048449	CK_peak_1799	19.6543	-	1	50	0	TraesCS1D03G0546200	6.29987	9.01818e-07	1.21194e-06	6.04488	5.91652	50
Chr1D	309579917	309580042	CK_peak_1800	14.4019	-	1	125	0	TraesCS1D03G0546600	3.95182	4.09948e-05	4.61964e-05	4.38727	4.33539	125
Chr1D	312539795	312539970	CK_peak_1801	59.1326	-	1	175	0	TraesCS1D03G0552400LC	5.47446	4.22978e-19	1.58243e-18	18.3737	17.8007	175
Chr1D	312542670	312542795	CK_peak_1802	10.6495	-	1	125	0	TraesCS1D03G0552400LC	5.36221	0.000611266	0.000622575	3.21377	3.20581	125
Chr1D	316203653	316203803	CK_peak_1803	61.9437	-	1	150	0	TraesCS1D03G0556400	4.47265	5.67193e-20	2.25473e-19	19.2463	18.6469	150
Chr1D	316468319	316468469	CK_peak_1804	44.7961	-	1	150	0	TraesCS1D03G0557500	3.88226	1.19038e-14	3.27361e-14	13.9243	13.485	150
Chr1D	316775798	316775948	CK_peak_1805	29.1697	-	1	150	0	TraesCS1D03G0558200	3.62721	9.13245e-10	1.6559e-09	9.03941	8.78097	150
Chr1D	317988769	317988894	CK_peak_1806	23.655	-	1	125	0	TraesCS1D03G0560200	4.17705	4.91564e-08	7.57081e-08	7.30842	7.12086	125
Chr1D	318357807	318357857	CK_peak_1807	24.3384	-	1	50	0	TraesCS1D03G0561200	3.47076	2.98914e-08	4.71417e-08	7.52445	7.32659	50
Chr1D	320317027	320317202	CK_peak_1808	36.2427	-	1	175	0	TraesCS1D03G0564600LC,TraesCS1D03G0564700	7.2666	5.55307e-12	1.2299e-11	11.2555	10.9101	175
Chr1D	320688118	320688193	CK_peak_1809	13.0876	-	1	75	0	TraesCS1D03G0565500	3.88898	0.00010626	0.000114879	3.97363	3.93976	75
Chr1D	322522041	322522241	CK_peak_1810	100.68	-	1	200	0	TraesCS1D03G0569100	4.36392	6.01715e-32	4.92251e-31	31.2206	30.3078	200
Chr1D	322893537	322893712	CK_peak_1811	49.7085	-	1	175	0	TraesCS1D03G0569900	5.61803	3.54579e-16	1.08705e-15	15.4503	14.9638	175
Chr1D	326923688	326923838	CK_peak_1812	36.0841	-	1	150	0	TraesCS1D03G0575500	4.28099	6.22061e-12	1.37277e-11	11.2062	10.8624	150
Chr1D	328314640	328314709	CK_peak_1813	12.0682	-	1	69	0	TraesCS1D03G0578500	6.93516	0.000221446	0.000232869	3.65473	3.63289	69
Chr1D	329212728	329212903	CK_peak_1814	114.912	-	1	175	0	TraesCS1D03G0580300	4.40611	2.49855e-36	2.55879e-35	35.6023	34.592	175
Chr1D	329269408	329269558	CK_peak_1815	40.1006	-	1	150	0	TraesCS1D03G0580700	3.91147	3.45926e-13	8.48212e-13	12.461	12.0715	150
Chr1D	330227540	330227665	CK_peak_1816	43.1847	-	1	125	0	TraesCS1D03G0581300	4.26081	3.78155e-14	1.00026e-13	13.4223	12.9999	125
Chr1D	331093219	331093319	CK_peak_1817	16.1085	-	1	100	0	TraesCS1D03G0583200	5.84654	1.18256e-05	1.41534e-05	4.92718	4.84914	100
Chr1D	332021450	332021550	CK_peak_1818	44.8461	-	1	100	0	TraesCS1D03G0584900,TraesCS1D03G0585100	3.83195	1.1488e-14	3.16211e-14	13.9398	13.5	100
Chr1D	332026315	332026365	CK_peak_1819	16.0371	-	1	50	0	TraesCS1D03G0585200	3.59146	1.24656e-05	1.48715e-05	4.90429	4.82764	50
Chr1D	332832234	332832434	CK_peak_1820	52.7051	-	1	200	0	TraesCS1D03G0585900	4.9835	4.14427e-17	1.36198e-16	16.3826	15.8658	200
Chr1D	337619205	337619330	CK_peak_1821	23.1558	-	1	125	0	TraesCS1D03G0593300	4.41736	7.06364e-08	1.07007e-07	7.15097	6.97059	125
Chr1D	337832172	337832222	CK_peak_1822	14.256	-	1	50	0	TraesCS1D03G0593700	4.05274	4.55364e-05	5.11103e-05	4.34164	4.29149	50
Chr1D	339465243	339465418	CK_peak_1823	77.3611	-	1	175	0	TraesCS1D03G0596000,TraesCS1D03G0596100	3.60569	9.63631e-25	5.15232e-24	24.0161	23.288	175
Chr1D	340144626	340145760	CK_peak_1824	126.078	-	2	90160	0,974	TraesCS1D03G0596200,TraesCS1D03G0596300	4.28641	9.17475e-40	1.1139e-38	39.0374	37.9532	1134
Chr1D	342791270	342791395	CK_peak_1825	31.9131	-	1	125	0	TraesCS1D03G0599900	4.36956	1.25795e-10	2.47292e-10	9.90034	9.60679	125
Chr1D	342885250	342885839	CK_peak_1826	190.623	-	2	92208	0,381	TraesCS1D03G0600200	5.63579	1.32699e-59	4.13809e-58	58.8771	57.3832	589
Chr1D	343258416	343258716	CK_peak_1827	55.3436	-	1	300	0	TraesCS1D03G0600900	5.82268	6.34176e-18	2.18741e-17	17.1978	16.6601	300
Chr1D	343735753	343735903	CK_peak_1828	41.4539	-	1	150	0	TraesCS1D03G0602500	3.86257	1.31021e-13	3.31994e-13	12.8827	12.4789	150
Chr1D	343735953	343736053	CK_peak_1829	41.7872	-	1	100	0	TraesCS1D03G0602500	3.32779	1.03094e-13	2.63507e-13	12.9868	12.5792	100
Chr1D	345081236	345081411	CK_peak_1830	76.7023	-	1	175	0	TraesCS1D03G0605500,TraesCS1D03G0605600	4.16597	1.53272e-24	8.13432e-24	23.8145	23.0897	175
Chr1D	345097239	345097314	CK_peak_1831	32.4878	-	1	75	0	TraesCS1D03G0606000LC	4.48802	8.29481e-11	1.66038e-10	10.0812	9.77979	75
Chr1D	345559583	345559783	CK_peak_1832	43.1084	-	1	200	0	TraesCS1D03G0606900	4.07347	3.99319e-14	1.05459e-13	13.3987	12.9769	200
Chr1D	346081667	346081842	CK_peak_1833	108.781	-	1	175	0	TraesCS1D03G0607700	5.20586	1.92226e-34	1.79391e-33	33.7162	32.7462	175
Chr1D	346797431	346797631	CK_peak_1834	201.208	-	1	200	0	TraesCS1D03G0609700	5.02027	7.20905e-63	2.69438e-61	62.1421	60.5695	200
Chr1D	347577222	347577447	CK_peak_1835	230.433	-	1	225	0	TraesCS1D03G0610200	5.05354	7.26329e-72	4.29294e-70	71.1389	69.3672	225
Chr1D	349710185	349710260	CK_peak_1836	27.2224	-	1	75	0	TraesCS1D03G0614900	3.92927	3.73091e-09	6.38598e-09	8.42818	8.19477	75
Chr1D	351830951	351831001	CK_peak_1837	21.6809	-	1	50	0	TraesCS1D03G0618200	4.97179	2.05874e-07	2.9743e-07	6.6864	6.52662	50
Chr1D	351841372	351841522	CK_peak_1838	19.3105	-	1	150	0	TraesCS1D03G0618500	5.00264	1.15656e-06	1.53801e-06	5.93683	5.81304	150
Chr1D	354521182	354521257	CK_peak_1839	10.4921	-	1	75	0	TraesCS1D03G0625700	5.27277	0.000683345	0.000694318	3.16536	3.15844	75
Chr1D	356995589	356995714	CK_peak_1840	69.5413	-	1	125	0	TraesCS1D03G0628600	4.23081	2.51687e-22	1.16408e-21	21.5991	20.934	125
Chr1D	357004420	357004470	CK_peak_1841	15.9145	-	1	50	0	TraesCS1D03G0628600	4.2428	1.36312e-05	1.61899e-05	4.86546	4.79075	50
Chr1D	358349414	358349589	CK_peak_1842	29.5313	-	1	175	0	TraesCS1D03G0632300	4.68057	7.02833e-10	1.28878e-09	9.15315	8.88982	175
Chr1D	358426779	358426954	CK_peak_1843	57.6903	-	1	175	0	TraesCS1D03G0632500	3.17838	1.18464e-18	4.30008e-18	17.9264	17.3665	175
Chr1D	359209918	359210903	CK_peak_1844	34.7533	-	2	174,1	0,984	TraesCS1D03G0633600	3.50541	1.6193e-11	3.45304e-11	10.7907	10.4618	985
Chr1D	359213280	359213430	CK_peak_1845	14.9061	-	1	150	0	TraesCS1D03G0633600	4.03631	2.8407e-05	3.25698e-05	4.54657	4.48719	150
Chr1D	362730316	362730391	CK_peak_1846	18.7555	-	1	75	0	TraesCS1D03G0638100	3.52191	1.73381e-06	2.25954e-06	5.761	5.64598	75
Chr1D	364267873	364267948	CK_peak_1847	13.1792	-	1	75	0	TraesCS1D03G0640900	5.50569	9.94245e-05	0.000107809	4.00251	3.96734	75
Chr1D	367953919	367954119	CK_peak_1848	121.814	-	1	200	0	TraesCS1D03G0649300	3.89871	1.88102e-38	2.13897e-37	37.7256	36.6698	200
Chr1D	368490727	368490827	CK_peak_1849	19.8972	-	1	100	0	TraesCS1D03G0652000	4.47185	7.556e-07	1.0241e-06	6.12171	5.98966	100
Chr1D	368920495	368920870	CK_peak_1850	127.028	-	1	375	0	TraesCS1D03G0652500	5.2711	4.67633e-40	5.7647e-39	39.3301	38.2392	375
Chr1D	376231026	376231226	CK_peak_1851	42.2603	-	1	200	0	TraesCS1D03G0666100	5.44187	7.3476e-14	1.8984e-13	13.1339	12.7216	200
Chr1D	376557081	376557256	CK_peak_1852	45.0244	-	1	175	0	TraesCS1D03G0666300	4.43155	1.01138e-14	2.79443e-14	13.9951	13.5537	175
Chr1D	378127196	378127246	CK_peak_1853	15.7414	-	1	50	0	TraesCS1D03G0669000	3.67789	1.54732e-05	1.8254e-05	4.81042	4.73864	50
Chr1D	379391430	379391605	CK_peak_1854	101.448	-	1	175	0	TraesCS1D03G0672600	4.8023	3.48655e-32	2.89105e-31	31.4576	30.5389	175
Chr1D	380312906	380313081	CK_peak_1855	78.0113	-	1	175	0	TraesCS1D03G0673700	4.24105	6.06913e-25	3.28301e-24	24.2169	23.4837	175
Chr1D	380905126	380905226	CK_peak_1856	19.4624	-	1	100	0	TraesCS1D03G0674300,TraesCS1D03G0674400LC	8.80384	1.03616e-06	1.3843e-06	5.98457	5.85877	100
Chr1D	384905464	384905564	CK_peak_1857	110.049	-	1	100	0	TraesCS1D03G0681800	3.25349	7.83205e-35	7.44582e-34	34.1061	33.1281	100
Chr1D	384951659	384951809	CK_peak_1858	21.6399	-	1	150	0	TraesCS1D03G0682300LC	3.65066	2.12117e-07	3.06015e-07	6.67342	6.51426	150
Chr1D	387014898	387014998	CK_peak_1859	32.652	-	1	100	0	TraesCS1D03G0686800	3.40896	7.36926e-11	1.48172e-10	10.1326	9.82923	100
Chr1D	387799890	387800115	CK_peak_1860	27.5414	-	1	225	0	TraesCS1D03G0689300	4.60456	2.96365e-09	5.11924e-09	8.52817	8.29079	225
Chr1D	388340225	388340275	CK_peak_1861	10.6885	-	1	50	0	TraesCS1D03G0689800	5.34926	0.000594509	0.000605954	3.22584	3.21756	50
Chr1D	388542684	388542897	CK_peak_1862	13.9142	-	2	33117	0,96	TraesCS1D03G0689900LC	4.09828	5.83425e-05	6.47736e-05	4.23401	4.1886	213
Chr1D	388985877	388985977	CK_peak_1863	14.0463	-	1	100	0	TraesCS1D03G0691400	6.52474	5.30128e-05	5.9106e-05	4.27562	4.22837	100
Chr1D	389121728	389121889	CK_peak_1864	26.8536	-	1	161	0	TraesCS1D03G0691700	5.53299	4.86433e-09	8.24636e-09	8.31298	8.08374	161
Chr1D	389124539	389124603	CK_peak_1865	11.1993	-	1	64	0	TraesCS1D03G0691800	5.58889	0.000412696	0.000425273	3.38437	3.37133	64
Chr1D	389372029	389372079	CK_peak_1866	22.4625	-	1	50	0	TraesCS1D03G0692100	3.56545	1.1669e-07	1.73027e-07	6.93296	6.76189	50
Chr1D	389394878	389395053	CK_peak_1867	17.3339	-	1	175	0	TraesCS1D03G0692500	3.3631	4.86067e-06	6.05311e-06	5.3133	5.21802	175
Chr1D	390133686	390133886	CK_peak_1868	98.9271	-	1	200	0	TraesCS1D03G0693800	4.93186	2.09056e-31	1.6595e-30	30.6797	29.78	200
Chr1D	395654900	395655050	CK_peak_1869	59.329	-	1	150	0	TraesCS1D03G0705000	4.74949	3.6768e-19	1.38097e-18	18.4345	17.8598	150
Chr1D	396181511	396181586	CK_peak_1870	15.8264	-	1	75	0	TraesCS1D03G0707900	4.01895	1.45469e-05	1.72105e-05	4.83723	4.76421	75
Chr1D	402081517	402081567	CK_peak_1871	13.9157	-	1	50	0	TraesCS1D03G0721400,TraesCS1D03G0721500	3.70114	5.82755e-05	6.47086e-05	4.23451	4.18904	50
Chr1D	402147523	402147623	CK_peak_1872	17.7152	-	1	100	0	TraesCS1D03G0721600	3.5283	3.68055e-06	4.64723e-06	5.43409	5.33281	100
Chr1D	403817762	403817962	CK_peak_1873	146.126	-	1	200	0	TraesCS1D03G0725400	4.89323	6.20471e-46	1.02731e-44	45.2073	43.9883	200
Chr1D	405363592	405363767	CK_peak_1874	116.157	-	1	175	0	TraesCS1D03G0728900	3.65946	1.03503e-36	1.07956e-35	35.985	34.9668	175
Chr1D	405366656	405367304	CK_peak_1875	28.9085	-	2	18107	0,541	TraesCS1D03G0728900	3.49817	1.10209e-09	1.98462e-09	8.95778	8.70232	648
Chr1D	405463983	405464083	CK_peak_1876	25.9877	-	1	100	0	TraesCS1D03G0729600	4.89357	9.09087e-09	1.50284e-08	8.04139	7.82309	100
Chr1D	406193614	406193714	CK_peak_1877	25.2549	-	1	100	0	TraesCS1D03G0732300	6.46968	1.54152e-08	2.49752e-08	7.81205	7.60249	100
Chr1D	406265722	406265772	CK_peak_1878	26.468	-	1	50	0	TraesCS1D03G0732900	3.93488	6.43028e-09	1.07729e-08	8.19177	7.96767	50
Chr1D	408683081	408683181	CK_peak_1879	39.2044	-	1	100	0	TraesCS1D03G0737500LC,TraesCS1D03G0737600	4.65146	6.60286e-13	1.57866e-12	12.1803	11.8017	100
Chr1D	408685126	408685301	CK_peak_1880	36.9217	-	1	175	0	TraesCS1D03G0737700	3.51668	3.41089e-12	7.68168e-12	11.4671	11.1145	175
Chr1D	411344262	411344337	CK_peak_1881	23.7512	-	1	75	0	TraesCS1D03G0745400	4.50133	4.58603e-08	7.08248e-08	7.33856	7.14981	75
Chr1D	411786392	411786567	CK_peak_1882	36.2784	-	1	175	0	TraesCS1D03G0746100	4.53507	5.41345e-12	1.19985e-11	11.2665	10.9209	175
Chr1D	412735654	412735829	CK_peak_1883	18.9643	-	1	175	0	TraesCS1D03G0748300	3.53443	1.48755e-06	1.95515e-06	5.82753	5.70882	175
Chr1D	413061656	413061831	CK_peak_1884	30.9	-	1	175	0	TraesCS1D03G0749800LC	4.29012	2.61218e-10	4.991e-10	9.583	9.30181	175
Chr1D	415648761	415648886	CK_peak_1885	11.1468	-	1	125	0	TraesCS1D03G0756800	4.81577	0.000428662	0.00044104	3.36789	3.35552	125
Chr1D	417810967	417811217	CK_peak_1886	96.6911	-	1	250	0	TraesCS1D03G0763700	5.01193	1.02685e-30	7.81747e-30	29.9885	29.1069	250
Chr1D	417830932	417831032	CK_peak_1887	60.4759	-	1	100	0	TraesCS1D03G0764000	3.38418	1.62081e-19	6.23662e-19	18.7903	18.2051	100
Chr1D	418867459	418867659	CK_peak_1888	45.08	-	1	200	0	TraesCS1D03G0768100	5.12189	9.70844e-15	2.68878e-14	14.0129	13.5704	200
Chr1D	419976894	419976994	CK_peak_1889	51.1985	-	1	100	0	TraesCS1D03G0772200	3.76052	1.21967e-16	3.86992e-16	15.9138	15.4123	100
Chr1D	422122768	422122918	CK_peak_1890	46.6716	-	1	150	0	TraesCS1D03G0778200	4.366	3.11426e-15	8.92154e-15	14.5066	14.0496	150
Chr1D	423042343	423042543	CK_peak_1891	146.198	-	1	200	0	TraesCS1D03G0781300	4.85572	5.89125e-46	9.77537e-45	45.2298	44.0099	200
Chr1D	424669229	424669354	CK_peak_1892	15.1244	-	1	125	0	TraesCS1D03G0786100LC	4.80209	2.42677e-05	2.79965e-05	4.61497	4.5529	125
Chr1D	424669404	424669554	CK_peak_1893	14.3112	-	1	150	0	TraesCS1D03G0786100LC	4.33024	4.37772e-05	4.91937e-05	4.35875	4.30809	150
Chr1D	425415315	425415465	CK_peak_1894	22.1274	-	1	150	0	TraesCS1D03G0789300	3.62438	1.48689e-07	2.18267e-07	6.82772	6.66101	150
Chr1D	426224061	426224336	CK_peak_1895	46.5079	-	1	275	0	TraesCS1D03G0791300	5.34944	3.50055e-15	9.99346e-15	14.4559	14.0003	275
Chr1D	426285897	426286022	CK_peak_1896	28.9532	-	1	125	0	TraesCS1D03G0791700	3.37857	1.06658e-09	1.92408e-09	8.97201	8.71578	125
Chr1D	427101579	427101629	CK_peak_1897	14.1507	-	1	50	0	TraesCS1D03G0792500	3.61403	4.91371e-05	5.49818e-05	4.30859	4.25978	50
Chr1D	432810638	432810838	CK_peak_1898	71.5146	-	1	200	0	TraesCS1D03G0804900	4.66292	6.13757e-23	2.96458e-22	22.212	21.528	200
Chr1D	434196977	434197227	CK_peak_1899	56.2518	-	1	250	0	TraesCS1D03G0808100	4.58757	3.32017e-18	1.1655e-17	17.4788	16.9335	250
Chr1D	435088189	435088439	CK_peak_1900	60.4726	-	1	250	0	TraesCS1D03G0811800	4.90163	1.62486e-19	6.25062e-19	18.7892	18.2041	250
Chr1D	437749240	437749415	CK_peak_1901	36.2274	-	1	175	0	TraesCS1D03G0819900	4.2618	5.61615e-12	1.24297e-11	11.2506	10.9055	175
Chr1D	439330987	439331103	CK_peak_1902	15.0854	-	1	116	0	TraesCS1D03G0825200LC	4.58754	2.49702e-05	2.87635e-05	4.60258	4.54116	116
Chr1D	439776965	439777140	CK_peak_1903	17.9552	-	1	175	0	TraesCS1D03G0826400	8.57209	3.09485e-06	3.93508e-06	5.50936	5.40505	175
Chr1D	440795368	440795468	CK_peak_1904	16.8137	-	1	100	0	TraesCS1D03G0829900	4.08547	7.08457e-06	8.68081e-06	5.14969	5.06144	100
Chr1D	440795593	440795768	CK_peak_1905	54.2439	-	1	175	0	TraesCS1D03G0829900	3.69414	1.38582e-17	4.68773e-17	16.8583	16.329	175
Chr1D	441497039	441497264	CK_peak_1906	90.7195	-	1	225	0	TraesCS1D03G0830800	3.92772	7.11626e-29	4.90578e-28	28.1477	27.3093	225
Chr1D	442118746	442118921	CK_peak_1907	23.8101	-	1	175	0	TraesCS1D03G0833600	9.54636	4.39078e-08	6.79884e-08	7.35746	7.16757	175
Chr1D	442369175	442369275	CK_peak_1908	28.3222	-	1	100	0	TraesCS1D03G0835100	3.83364	1.68285e-09	2.97977e-09	8.77395	8.52582	100
Chr1D	446861364	446861439	CK_peak_1909	14.829	-	1	75	0	TraesCS1D03G0848200	4.59335	3.00516e-05	3.43573e-05	4.52213	4.46398	75
Chr1D	446867788	446867988	CK_peak_1910	46.8657	-	1	200	0	TraesCS1D03G0848300	4.04916	2.70648e-15	7.79878e-15	14.5676	14.108	200
Chr1D	447379974	447380249	CK_peak_1911	225.042	-	1	275	0	TraesCS1D03G0849900	5.1217	3.25958e-70	1.80092e-68	69.4868	67.7445	275
Chr1D	447714224	447714374	CK_peak_1912	35.953	-	1	150	0	TraesCS1D03G0852000	3.83973	6.84022e-12	1.50341e-11	11.1649	10.8229	150
Chr1D	447913255	447913405	CK_peak_1913	16.435	-	1	150	0	TraesCS1D03G0853200	5.89542	9.32306e-06	1.12867e-05	5.03044	4.94743	150
Chr1D	448066034	448066234	CK_peak_1914	52.8378	-	1	200	0	TraesCS1D03G0853500	5.55382	3.77295e-17	1.24236e-16	16.4233	15.9058	200
Chr1D	449218695	449218870	CK_peak_1915	24.6015	-	1	175	0	TraesCS1D03G0856900	3.78519	2.47278e-08	3.92826e-08	7.60681	7.4058	175
Chr1D	450279216	450279366	CK_peak_1916	56.3559	-	1	150	0	TraesCS1D03G0860800	4.21306	3.07782e-18	1.08442e-17	17.5118	16.9648	150
Chr1D	450295799	450295949	CK_peak_1917	39.4471	-	1	150	0	TraesCS1D03G0860900	6.32453	5.54228e-13	1.33429e-12	12.2563	11.8747	150
Chr1D	452615573	452615748	CK_peak_1918	78.3217	-	1	175	0	TraesCS1D03G0866400	4.0541	4.85259e-25	2.64748e-24	24.314	23.5772	175
Chr1D	453639966	453640016	CK_peak_1919	10.8493	-	1	50	0	TraesCS1D03G0868700	6.40582	0.000529676	0.000542046	3.27599	3.26596	50
Chr1D	454125264	454125489	CK_peak_1920	153.201	-	1	225	0	TraesCS1D03G0870600	4.11042	4.1657e-48	7.61664e-47	47.3803	46.1182	225
Chr1D	454447860	454447985	CK_peak_1921	39.712	-	1	125	0	TraesCS1D03G0872500	4.05064	4.57884e-13	1.11041e-12	12.3392	11.9545	125
Chr1D	454772861	454772911	CK_peak_1922	26.1666	-	1	50	0	TraesCS1D03G0873400LC,TraesCS1D03G0873500	3.18599	7.99138e-09	1.3276e-08	8.09738	7.87693	50
Chr1D	454996721	454996971	CK_peak_1923	104.175	-	1	250	0	TraesCS1D03G0874700	3.99948	5.07659e-33	4.36867e-32	32.2944	31.3597	250
Chr1D	455012896	455013146	CK_peak_1924	352.623	-	1	250	0	TraesCS1D03G0874900	4.50398	2.22807e-109	7.07831e-107	108.652	106.15	250
Chr1D	455717891	455718066	CK_peak_1925	29.6228	-	1	175	0	TraesCS1D03G0877100	4.63025	6.57347e-10	1.20959e-09	9.18221	8.91736	175
Chr1D	457064112	457064162	CK_peak_1926	20.4529	-	1	50	0	TraesCS1D03G0881400	3.4152	5.039e-07	6.96707e-07	6.29766	6.15695	50
Chr1D	458276532	458276607	CK_peak_1927	21.229	-	1	75	0	TraesCS1D03G0884300	3.84075	2.86197e-07	4.06844e-07	6.54334	6.39057	75
Chr1D	460476623	460476873	CK_peak_1928	195.94	-	1	250	0	TraesCS1D03G0889500	3.86274	3.05588e-61	1.03784e-59	60.5149	58.9839	250
Chr1D	460478857	460478932	CK_peak_1929	11.3108	-	1	75	0	TraesCS1D03G0889500	5.42787	0.000380994	0.000393643	3.41908	3.4049	75
Chr1D	460569792	460570042	CK_peak_1930	63.5199	-	1	250	0	TraesCS1D03G0889900	4.26015	1.84213e-20	7.56141e-20	19.7347	19.1214	250
Chr1D	461391315	461391390	CK_peak_1931	12.7881	-	1	75	0	TraesCS1D03G0894300	3.91207	0.00013173	0.000141382	3.88031	3.84961	75
Chr1D	461635021	461635196	CK_peak_1932	27.436	-	1	175	0	TraesCS1D03G0895700	4.69259	3.19811e-09	5.50739e-09	8.49511	8.25905	175
Chr1D	462477939	462478064	CK_peak_1933	32.6488	-	1	125	0	TraesCS1D03G0897200	3.61073	7.38675e-11	1.48504e-10	10.1315	9.82826	125
Chr1D	466775532	466775607	CK_peak_1934	19.2871	-	1	75	0	TraesCS1D03G0919700	3.90147	1.1771e-06	1.56315e-06	5.92919	5.806	75
Chr1D	466775657	466775707	CK_peak_1935	31.9719	-	1	50	0	TraesCS1D03G0919700,TraesCS1D03G0919800LC	3.76744	1.20551e-10	2.37412e-10	9.91883	9.6245	50
Chr1D	466954859	466955034	CK_peak_1936	42.4081	-	1	175	0	TraesCS1D03G0920400	4.40029	6.59728e-14	1.71354e-13	13.1806	12.7661	175
Chr1D	467222819	467223019	CK_peak_1937	35.8224	-	1	200	0	TraesCS1D03G0922100	4.50802	7.51498e-12	1.64578e-11	11.1241	10.7836	200
Chr1D	467754072	467754222	CK_peak_1938	17.1782	-	1	150	0	TraesCS1D03G0925100	3.86525	5.44119e-06	6.74301e-06	5.26431	5.17115	150
Chr1D	468979336	468979461	CK_peak_1939	35.0874	-	1	125	0	TraesCS1D03G0930700	3.97179	1.27421e-11	2.73937e-11	10.8948	10.5623	125
Chr1D	471069763	471069888	CK_peak_1940	31.4705	-	1	125	0	TraesCS1D03G0938600	4.10983	1.73254e-10	3.36083e-10	9.76132	9.47355	125
Chr1D	472446010	472446134	CK_peak_1941	9.9613	-	1	124	0	TraesCS1D03G0942200	5.06092	0.000996862	0.00100311	3.00137	2.99865	124
Chr1D	474273087	474273387	CK_peak_1942	61.4493	-	1	300	0	TraesCS1D03G0951200	6.50983	8.07749e-20	3.17622e-19	19.0927	18.4981	300
Chr1D	474275114	474275164	CK_peak_1943	14.1812	-	1	50	0	TraesCS1D03G0951200	5.00868	4.80574e-05	5.38329e-05	4.31824	4.26895	50
Chr1D	475181720	475181995	CK_peak_1944	136.791	-	1	275	0	TraesCS1D03G0953600	4.2218	4.68484e-43	6.63316e-42	42.3293	41.1783	275
Chr1D	475189500	475189625	CK_peak_1945	30.1373	-	1	125	0	TraesCS1D03G0953700	5.67321	4.53686e-10	8.46787e-10	9.34325	9.07223	125
Chr1D	478557306	478557481	CK_peak_1946	35.9715	-	1	175	0	TraesCS1D03G0966700	3.52321	6.74811e-12	1.48423e-11	11.1708	10.8285	175
Chr1D	479193412	479193612	CK_peak_1947	26.4823	-	1	200	0	TraesCS1D03G0969200	4.44576	6.36053e-09	1.06666e-08	8.19651	7.97197	200
Chr1D	479207687	479207887	CK_peak_1948	148.43	-	1	200	0	TraesCS1D03G0969300	3.70139	1.21951e-46	2.08012e-45	45.9138	44.6819	200
Chr1D	479210994	479211069	CK_peak_1949	17.9272	-	1	75	0	TraesCS1D03G0969300	3.97743	3.15765e-06	4.01225e-06	5.50064	5.39661	75
Chr1D	479528583	479528858	CK_peak_1950	396.111	-	1	275	0	TraesCS1D03G0971000	5.54609	9.40693e-123	5.73785e-120	122.027	119.241	275
Chr1D	479538762	479539479	CK_peak_1951	30.7145	-	3	26,70,79	0,464,638	TraesCS1D03G0971200	4.81096	2.98873e-10	5.67561e-10	9.52451	9.24599	717
Chr1D	479893600	479893800	CK_peak_1952	61.9514	-	1	200	0	TraesCS1D03G0972400	4.30663	5.63734e-20	2.24273e-19	19.2489	18.6492	200
Chr1D	480975131	480975331	CK_peak_1953	39.3771	-	1	200	0	TraesCS1D03G0976100	4.81563	5.83067e-13	1.40063e-12	12.2343	11.8537	200
Chr1D	482102876	482103201	CK_peak_1954	98.9364	-	1	325	0	TraesCS1D03G0981000	4.1516	2.07609e-31	1.64887e-30	30.6828	29.7828	325
Chr1D	483169663	483169734	CK_peak_1955	10.8431	-	1	71	0	TraesCS1D03G0985400LC,TraesCS1D03G0985500	4.21098	0.000532033	0.000544385	3.27406	3.26409	71
Chr1D	483503166	483503241	CK_peak_1956	27.9187	-	1	75	0	TraesCS1D03G0986000	3.72358	2.25475e-09	3.94117e-09	8.6469	8.40438	75
Chr1D	484047600	484047675	CK_peak_1957	13.5703	-	1	75	0	TraesCS1D03G0988400	5.04951	7.48726e-05	8.22099e-05	4.12568	4.08508	75
Chr1D	484158957	484159111	CK_peak_1958	12.5989	-	2	1,49	0,105	TraesCS1D03G0989700	3.66655	0.000151026	0.000161195	3.82095	3.79265	154
Chr1D	485528310	485528485	CK_peak_1959	36.5398	-	1	175	0	TraesCS1D03G0995500	3.62904	4.48927e-12	1.00098e-11	11.3478	10.9996	175
Chr1D	485804308	485804383	CK_peak_1960	47.3591	-	1	75	0	TraesCS1D03G0996900LC	7.24485	1.89959e-15	5.53966e-15	14.7213	14.2565	75
Chr1D	487066261	487066411	CK_peak_1961	47.0596	-	1	150	0	TraesCS1D03G1003200	4.46011	2.35352e-15	6.81779e-15	14.6283	14.1664	150
Chr1D	487783149	487783449	CK_peak_1962	92.1292	-	1	300	0	TraesCS1D03G1005800	4.65929	2.61307e-29	1.84647e-28	28.5828	27.7337	300
Chr1D	488180459	488180784	CK_peak_1963	197.155	-	1	325	0	TraesCS1D03G1007700	4.36109	1.29885e-61	4.47093e-60	60.8864	59.3496	325
Chr1D	488184321	488184371	CK_peak_1964	12.1266	-	1	50	0	TraesCS1D03G1007700	3.73188	0.000212331	0.000223625	3.67299	3.65048	50
Chr1D	488184396	488184446	CK_peak_1965	13.3708	-	1	50	0	TraesCS1D03G1007700	7.41677	8.65356e-05	9.44041e-05	4.06281	4.02501	50
Chr1D	490492996	490493071	CK_peak_1966	15.1469	-	1	75	0	TraesCS1D03G1021400	7.88317	2.38675e-05	2.7564e-05	4.62219	4.55966	75
Chr1D	491602572	491602747	CK_peak_1967	11.5965	-	1	175	0	TraesCS1D03G1026000LC	3.57972	0.000310298	0.000322919	3.50822	3.49091	175
Chr1D	495427116	495427291	CK_peak_1968	36.1093	-	1	175	0	TraesCS1D03G1039100	3.46749	6.10936e-12	1.34899e-11	11.214	10.87	175
Chr1D	495467011	495467086	CK_peak_1969	21.7955	-	1	75	0	TraesCS1D03G1039300	3.44249	1.89199e-07	2.74718e-07	6.72308	6.56111	75
Chr1D	496596707	496596907	CK_peak_1970	43.1572	-	1	200	0	TraesCS1D03G1041100	4.48392	3.85637e-14	1.01952e-13	13.4138	12.9916	200
Chr1D	496881514	496881689	CK_peak_1971	64.3336	-	1	175	0	TraesCS1D03G1042000	5.51679	1.02915e-20	4.30194e-20	19.9875	19.3663	175
Chr1D	497116132	497116257	CK_peak_1972	50.8523	-	1	125	0	TraesCS1D03G1043500	3.68801	1.56373e-16	4.9196e-16	15.8058	15.3081	125
Chr1D	497330689	497330864	CK_peak_1973	30.4124	-	1	175	0	TraesCS1D03G1045100	4.23079	3.72027e-10	6.99771e-10	9.42943	9.15504	175
Chr2A	257630	257730	CK_peak_1974	32.087	+	1	100	0	TraesCS2A03G0000200	3.28874	1.10868e-10	2.19212e-10	9.95519	9.65914	100
Chr2A	389137	389237	CK_peak_1975	16.4615	+	1	100	0	TraesCS2A03G0001200	8.38449	9.14327e-06	1.10814e-05	5.0389	4.95541	100
Chr2A	6547685	6547935	CK_peak_1976	56.0149	+	1	250	0	TraesCS2A03G0025400	5.86058	3.93699e-18	1.37349e-17	17.4048	16.8622	250
Chr2A	12918886	12918961	CK_peak_1977	18.5255	+	1	75	0	TraesCS2A03G0046000	4.6564	2.04785e-06	2.65023e-06	5.6887	5.57672	75
Chr2A	17884199	17884249	CK_peak_1978	40.2027	+	1	50	0	TraesCS2A03G0064300	3.41738	3.21574e-13	7.90278e-13	12.4927	12.1022	50
Chr2A	17890369	17890519	CK_peak_1979	54.5899	+	1	150	0	TraesCS2A03G0064400	4.36384	1.08428e-17	3.68819e-17	16.9649	16.4332	150
Chr2A	18080228	18080303	CK_peak_1980	15.4764	+	1	75	0	TraesCS2A03G0066700	6.68007	1.87761e-05	2.19349e-05	4.72639	4.65886	75
Chr2A	18305645	18305820	CK_peak_1981	35.5896	+	1	175	0	TraesCS2A03G0068200	4.21415	8.89482e-12	1.93408e-11	11.0509	10.7135	175
Chr2A	18338113	18338213	CK_peak_1982	49.3137	+	1	100	0	TraesCS2A03G0068300	3.77002	4.6967e-16	1.42926e-15	15.3282	14.8449	100
Chr2A	18675101	18675201	CK_peak_1983	22.425	+	1	100	0	TraesCS2A03G0070100	4.00824	1.19841e-07	1.77577e-07	6.9214	6.75061	100
Chr2A	19669204	19669379	CK_peak_1984	47.0981	+	1	175	0	TraesCS2A03G0076900	4.10941	2.28982e-15	6.63831e-15	14.6402	14.1779	175
Chr2A	19841011	19841261	CK_peak_1985	90.1741	+	1	250	0	TraesCS2A03G0078900	4.00622	1.04609e-28	7.15971e-28	27.9804	27.1451	250
Chr2A	19841286	19841407	CK_peak_1986	16.0694	+	1	121	0	TraesCS2A03G0078900	3.83842	1.21727e-05	1.45426e-05	4.91461	4.83736	121
Chr2A	19978535	19978632	CK_peak_1987	20.6446	+	1	97	0	TraesCS2A03G0079500	3.5398	4.38174e-07	6.10021e-07	6.35835	6.21466	97
Chr2A	20846222	20846372	CK_peak_1988	20.0485	+	1	150	0	TraesCS2A03G0084800	4.06589	6.76336e-07	9.2216e-07	6.16984	6.03519	150
Chr2A	22859414	22859614	CK_peak_1989	32.1705	+	1	200	0	TraesCS2A03G0095400	5.91104	1.0423e-10	2.06872e-10	9.98201	9.6843	200
Chr2A	24816583	24816633	CK_peak_1990	11.8807	+	1	50	0	TraesCS2A03G0101700	4.92002	0.000253413	0.000265186	3.59617	3.57645	50
Chr2A	28954846	28955046	CK_peak_1991	84.7454	+	1	200	0	TraesCS2A03G0112200	3.8772	4.96472e-27	3.08379e-26	26.3041	25.5109	200
Chr2A	31396040	31396215	CK_peak_1992	23.0139	+	1	175	0	TraesCS2A03G0119500	4.60585	7.8276e-08	1.18064e-07	7.10637	6.92788	175
Chr2A	31923873	31923948	CK_peak_1993	16.323	+	1	75	0	TraesCS2A03G0120900	4.94764	1.01191e-05	1.21981e-05	4.99486	4.91371	75
Chr2A	31950178	31950478	CK_peak_1994	51.5225	+	1	300	0	TraesCS2A03G0121000	5.40245	9.66694e-17	3.09168e-16	16.0147	15.5098	300
Chr2A	33605118	33605343	CK_peak_1995	46.818	+	1	225	0	TraesCS2A03G0128200	4.19551	2.80211e-15	8.06062e-15	14.5525	14.0936	225
Chr2A	34110175	34110275	CK_peak_1996	50.4816	+	1	100	0	TraesCS2A03G0129300	3.97663	2.03647e-16	6.36094e-16	15.6911	15.1965	100
Chr2A	36207869	36207967	CK_peak_1997	17.7506	+	1	98	0	TraesCS2A03G0138100	3.35932	3.58838e-06	4.53462e-06	5.4451	5.34346	98
Chr2A	38889372	38889545	CK_peak_1998	61.2686	+	1	173	0	TraesCS2A03G0149300	3.70773	9.19115e-20	3.6002e-19	19.0366	18.4437	173
[truncated: 13,252 more rows]

## Sheet: Table S18. Infect.peak MeRIPseq
Supplementary Table S18. Infected sample peak identification of MeRIP-seq
chr	start	end	name	score	strand	blockCount	blockSizes	blockStarts	geneID	log2FC	p-value	adj.p-value	lg.p-value	lg.adj.p-value	length
Chr1A	1186813	1186888	Infected_peak_1	38.8184	+	1	75	0	TraesCS1A03G0004500	3.97694	1.15383e-12	2.06306e-12	11.9379	11.6855	75
Chr1A	1188551	1188701	Infected_peak_2	109.719	+	1	150	0	TraesCS1A03G0004500	3.7343	1.99267e-34	9.36271e-34	33.7006	33.0286	150
Chr1A	4440028	4440153	Infected_peak_3	15.4725	+	1	125	0	TraesCS1A03G0016400	4.8796	1.94029e-05	2.19947e-05	4.71213	4.65768	125
Chr1A	4443142	4443192	Infected_peak_4	26.2824	+	1	50	0	TraesCS1A03G0016400	5.3529	8.52122e-09	1.22523e-08	8.0695	7.91178	50
Chr1A	5033211	5033436	Infected_peak_5	166.563	+	1	225	0	TraesCS1A03G0020600	4.20803	8.26307e-52	7.23586e-51	51.0829	50.1405	225
Chr1A	8532566	8532786	Infected_peak_6	114.898	+	1	220	0	TraesCS1A03G0031500	5.17045	5.19359e-36	2.58436e-35	35.2845	34.5876	220
Chr1A	12956960	12957035	Infected_peak_7	20.0247	+	1	75	0	TraesCS1A03G0053400	4.47535	7.39846e-07	9.37482e-07	6.13086	6.02804	75
Chr1A	15306768	15306843	Infected_peak_8	18.4112	+	1	75	0	TraesCS1A03G0066600	4.04497	2.35237e-06	2.86864e-06	5.62849	5.54232	75
Chr1A	15517606	15517781	Infected_peak_9	7.95384	+	1	175	0	TraesCS1A03G0068100	2.4696	0.00395063	0.00403326	2.40333	2.39434	175
Chr1A	15681730	15681830	Infected_peak_10	24.7686	+	1	100	0	TraesCS1A03G0069000	4.52148	2.50377e-08	3.4987e-08	7.60141	7.45609	100
Chr1A	23277685	23277791	Infected_peak_11	20.073	+	2	38,12	0,94	TraesCS1A03G0093500	4.81631	7.14765e-07	9.066e-07	6.14584	6.04258	106
Chr1A	23562295	23562620	Infected_peak_12	188.605	+	1	325	0	TraesCS1A03G0094000	5.38934	1.54241e-58	1.67601e-57	57.8118	56.7757	325
Chr1A	24230249	24230524	Infected_peak_13	47.576	+	1	275	0	TraesCS1A03G0096600	4.55466	2.32901e-15	4.76634e-15	14.6328	14.3218	275
Chr1A	25406252	25406352	Infected_peak_14	16.6534	+	1	100	0	TraesCS1A03G0101600	4.49922	8.30099e-06	9.70096e-06	5.08087	5.01319	100
Chr1A	27853533	27853908	Infected_peak_15	177.695	+	1	375	0	TraesCS1A03G0107200	5.6206	3.26529e-55	3.22449e-54	54.4861	53.4915	375
Chr1A	29395103	29395153	Infected_peak_16	15.8092	+	1	50	0	TraesCS1A03G0109100	5.89024	1.52415e-05	1.74166e-05	4.81697	4.75904	50
Chr1A	29897486	29897536	Infected_peak_17	12.7192	+	1	50	0	TraesCS1A03G0110900	5.25217	0.000141101	0.000148298	3.85047	3.82886	50
Chr1A	31928021	31928146	Infected_peak_18	32.7721	+	1	125	0	TraesCS1A03G0115300LC	5.76977	8.46082e-11	1.36338e-10	10.0726	9.86538	125
Chr1A	34219824	34219899	Infected_peak_19	24.2138	+	1	75	0	TraesCS1A03G0121700	4.76139	3.71671e-08	5.13935e-08	7.42984	7.28909	75
Chr1A	36345438	36345638	Infected_peak_20	113.543	+	1	200	0	TraesCS1A03G0128600	4.03194	1.34635e-35	6.60723e-35	34.8708	34.18	200
Chr1A	38849762	38849982	Infected_peak_21	191.124	+	1	220	0	TraesCS1A03G0136200	5.83675	2.61227e-59	2.92391e-58	58.583	57.534	220
Chr1A	50144648	50144742	Infected_peak_22	66.4757	+	1	94	0	TraesCS1A03G0160100	4.27609	3.6437e-21	9.74564e-21	20.4385	20.0112	94
Chr1A	51143094	51143344	Infected_peak_23	49.5834	+	2	143,32	0,218	TraesCS1A03G0162100	4.28253	5.64673e-16	1.18549e-15	15.2482	14.9261	250
Chr1A	51649354	51649479	Infected_peak_24	37.937	+	1	125	0	TraesCS1A03G0164000,TraesCS1A03G0164200LC,TraesCS1A03G0164300	3.60505	2.15593e-12	3.80043e-12	11.6664	11.4202	125
Chr1A	51699072	51699197	Infected_peak_25	22.46	+	1	125	0	TraesCS1A03G0164500	4.47639	1.3004e-07	1.73322e-07	6.88592	6.76115	125
Chr1A	51699497	51699547	Infected_peak_26	21.186	+	1	50	0	TraesCS1A03G0164500	5.07163	3.2267e-07	4.19152e-07	6.49124	6.37763	50
Chr1A	56366990	56367165	Infected_peak_27	21.4257	+	1	175	0	TraesCS1A03G0174000	7.6319	2.7191e-07	3.54995e-07	6.56558	6.44978	175
Chr1A	59683254	59683429	Infected_peak_28	45.8789	+	1	175	0	TraesCS1A03G0178400	4.35016	7.75423e-15	1.54548e-14	14.1105	13.8109	175
Chr1A	61416621	61416771	Infected_peak_29	73.7013	+	1	150	0	TraesCS1A03G0186000	3.94595	2.19765e-23	6.51166e-23	22.658	22.1863	150
Chr1A	64035811	64035936	Infected_peak_30	23.1622	+	1	125	0	TraesCS1A03G0193000	4.29063	7.87208e-08	1.06535e-07	7.10391	6.97251	125
Chr1A	65066511	65066611	Infected_peak_31	103.776	+	1	100	0	TraesCS1A03G0193900	3.87792	1.32139e-32	5.75881e-32	31.879	31.2397	100
Chr1A	67121906	67121956	Infected_peak_32	34.1057	+	1	50	0	TraesCS1A03G0197700	4.22015	3.27766e-11	5.40947e-11	10.4844	10.2668	50
Chr1A	67677040	67677228	Infected_peak_33	354.708	+	1	188	0	TraesCS1A03G0200200	4.53554	3.04476e-109	1.66845e-107	108.516	106.778	188
Chr1A	70087845	70087986	Infected_peak_34	68.6157	+	1	141	0	TraesCS1A03G0202700	3.65733	8.01672e-22	2.21107e-21	21.096	20.6554	141
Chr1A	74072499	74072774	Infected_peak_35	163.792	+	1	275	0	TraesCS1A03G0207600	4.05445	5.79764e-51	4.93892e-50	50.2367	49.3064	275
Chr1A	75664817	75664942	Infected_peak_36	45.9974	+	1	125	0	TraesCS1A03G0210300	4.21353	7.1317e-15	1.42363e-14	14.1468	13.8466	125
Chr1A	75670893	75671014	Infected_peak_37	32.1935	+	1	121	0	TraesCS1A03G0210400	5.19599	1.2769e-10	2.03611e-10	9.89384	9.6912	121
Chr1A	75694075	75694422	Infected_peak_38	81.7586	+	1	347	0	TraesCS1A03G0210700	5.33179	7.41037e-26	2.44467e-25	25.1302	24.6118	347
Chr1A	78387504	78387554	Infected_peak_39	38.6101	+	1	50	0	TraesCS1A03G0213700	3.81339	1.33758e-12	2.3835e-12	11.8737	11.6228	50
Chr1A	78387579	78387754	Infected_peak_40	52.8889	+	1	175	0	TraesCS1A03G0213700	4.24071	5.45385e-17	1.19911e-16	16.2633	15.9211	175
Chr1A	79459719	79460019	Infected_peak_41	230.179	+	1	300	0	TraesCS1A03G0215400	5.02575	3.19155e-71	5.11794e-70	70.496	69.2909	300
Chr1A	82524755	82525030	Infected_peak_42	74.3063	+	1	275	0	TraesCS1A03G0218400	4.33038	1.43626e-23	4.28123e-23	22.8428	22.3684	275
Chr1A	84821547	84821622	Infected_peak_43	13.8832	+	1	75	0	TraesCS1A03G0220900	5.36444	6.10622e-05	6.61822e-05	4.21423	4.17926	75
Chr1A	84821647	84821697	Infected_peak_44	16.8371	+	1	50	0	TraesCS1A03G0220900	4.86119	7.27543e-06	8.54155e-06	5.13814	5.06846	50
Chr1A	84831985	84832160	Infected_peak_45	84.9246	+	1	175	0	TraesCS1A03G0220900	3.94488	7.92044e-27	2.72359e-26	26.1013	25.5649	175
Chr1A	87324403	87324503	Infected_peak_46	19.4244	+	1	100	0	TraesCS1A03G0224100	4.21904	1.13705e-06	1.42125e-06	5.94422	5.84733	100
Chr1A	87326613	87326888	Infected_peak_47	216.038	+	1	275	0	TraesCS1A03G0224100	3.52556	6.49541e-67	9.24574e-66	66.1874	65.0341	275
Chr1A	89480115	89480165	Infected_peak_48	12.8911	+	1	50	0	TraesCS1A03G0227400	5.42516	0.000124726	0.000131646	3.90404	3.88059	50
Chr1A	93765778	93765953	Infected_peak_49	62.1405	+	1	175	0	TraesCS1A03G0232100	4.41609	7.8393e-20	1.96715e-19	19.1057	18.7062	175
Chr1A	95653207	95653382	Infected_peak_50	52.6345	+	1	175	0	TraesCS1A03G0233600	3.7523	6.52943e-17	1.43031e-16	16.1851	15.8446	175
Chr1A	96349483	96349655	Infected_peak_51	89.9168	+	1	172	0	TraesCS1A03G0234400	4.84036	2.32673e-28	8.55771e-28	27.6333	27.0676	172
Chr1A	98053465	98053590	Infected_peak_52	19.7473	+	1	125	0	TraesCS1A03G0241600	5.68042	9.02636e-07	1.13626e-06	6.04449	5.94452	125
Chr1A	101232339	101232478	Infected_peak_53	27.1893	+	1	139	0	TraesCS1A03G0248900	8.42436	4.46888e-09	6.53451e-09	8.3498	8.18479	139
Chr1A	103166460	103166610	Infected_peak_54	22.0493	+	1	150	0	TraesCS1A03G0255000	4.29319	1.74301e-07	2.30406e-07	6.7587	6.63751	150
Chr1A	104209683	104209858	Infected_peak_55	59.0528	+	1	175	0	TraesCS1A03G0256500	3.82119	6.93514e-19	1.67237e-18	18.1589	17.7767	175
Chr1A	106212031	106212181	Infected_peak_56	26.7312	+	1	150	0	TraesCS1A03G0258300	4.32206	6.18848e-09	8.97621e-09	8.20842	8.04691	150
Chr1A	108926443	108926579	Infected_peak_57	51.1581	+	1	136	0	TraesCS1A03G0260600	5.11464	1.85624e-16	3.97981e-16	15.7314	15.4001	136
Chr1A	108936958	108937108	Infected_peak_58	12.7899	+	1	150	0	TraesCS1A03G0260700	7.18718	0.000134158	0.000141209	3.87238	3.85014	150
Chr1A	109306524	109306724	Infected_peak_59	54.0073	+	1	200	0	TraesCS1A03G0261400	4.64857	2.46698e-17	5.52327e-17	16.6078	16.2578	200
Chr1A	110891073	110891351	Infected_peak_60	71.3743	+	2	22178	0,100	TraesCS1A03G0264500	4.95843	1.13562e-22	3.26732e-22	21.9448	21.4858	278
Chr1A	111772874	111773094	Infected_peak_61	205.668	+	1	220	0	TraesCS1A03G0266600	5.16623	9.53732e-64	1.22396e-62	63.0206	61.9122	220
Chr1A	116041935	116042285	Infected_peak_62	127.468	+	1	350	0	TraesCS1A03G0272100,TraesCS1A03G0272200	4.25619	7.3994e-40	4.25025e-39	39.1308	38.3716	350
Chr1A	116739656	116739798	Infected_peak_63	46.4862	+	1	142	0	TraesCS1A03G0273200	4.48118	5.03854e-15	1.0145e-14	14.2977	13.9937	142
Chr1A	121656239	121656389	Infected_peak_64	49.4875	+	1	150	0	TraesCS1A03G0280900	3.96611	6.04642e-16	1.26702e-15	15.2185	14.8972	150
Chr1A	122167708	122167844	Infected_peak_65	25.1606	+	1	136	0	TraesCS1A03G0282800	5.43781	1.89427e-08	2.66619e-08	7.72256	7.57411	136
Chr1A	129227461	129227636	Infected_peak_66	27.1813	+	1	175	0	TraesCS1A03G0290600LC	6.67273	4.49462e-09	6.57053e-09	8.34731	8.1824	175
Chr1A	129882339	129882514	Infected_peak_67	46.9298	+	1	175	0	TraesCS1A03G0291600	4.55818	3.68225e-15	7.45972e-15	14.4339	14.1273	175
Chr1A	135223460	135223560	Infected_peak_68	13.4898	+	1	100	0	TraesCS1A03G0295500	6.17229	8.11094e-05	8.69293e-05	4.09093	4.06083	100
Chr1A	135224110	135224160	Infected_peak_69	25.9777	+	1	50	0	TraesCS1A03G0295500	4.20942	1.0584e-08	1.5133e-08	7.97535	7.82007	50
Chr1A	135513984	135514109	Infected_peak_70	34.1786	+	1	125	0	TraesCS1A03G0297300	4.42297	3.1118e-11	5.14286e-11	10.507	10.2888	125
Chr1A	137038924	137039098	Infected_peak_71	296.316	+	1	174	0	TraesCS1A03G0298500	4.60349	2.03148e-91	6.31137e-90	90.6922	89.1999	174
Chr1A	138057176	138057251	Infected_peak_72	47.7323	+	1	75	0	TraesCS1A03G0300000LC,TraesCS1A03G0300100	3.75656	2.08675e-15	4.27693e-15	14.6805	14.3689	75
Chr1A	138058951	138059176	Infected_peak_73	210.614	+	1	225	0	TraesCS1A03G0300000LC,TraesCS1A03G0300200	4.68903	2.97253e-65	3.97168e-64	64.5269	63.401	225
Chr1A	139046202	139046377	Infected_peak_74	68.8679	+	1	175	0	TraesCS1A03G0300800	4.41163	6.69776e-22	1.85646e-21	21.1741	20.7313	175
Chr1A	141634138	141634571	Infected_peak_75	44.0136	+	2	43,82	0,351	TraesCS1A03G0303800	5.11392	2.90474e-14	5.63106e-14	13.5369	13.2494	433
Chr1A	141637050	141637192	Infected_peak_76	71.6366	+	1	142	0	TraesCS1A03G0303800	3.75386	9.43494e-23	2.72419e-22	22.0253	21.5648	142
Chr1A	150345976	150346026	Infected_peak_77	29.0621	+	1	50	0	TraesCS1A03G0310500	4.35339	1.17881e-09	1.78415e-09	8.92856	8.74857	50
Chr1A	151031120	151031295	Infected_peak_78	209.236	+	1	175	0	TraesCS1A03G0311400	5.5101	7.80699e-65	1.0323e-63	64.1075	62.9862	175
Chr1A	156062064	156062203	Infected_peak_79	134.019	+	1	139	0	TraesCS1A03G0316400	4.44661	7.32648e-42	4.53186e-41	41.1351	40.3437	139
Chr1A	156621478	156621628	Infected_peak_80	30.231	+	1	150	0	TraesCS1A03G0317300	6.2124	5.14562e-10	7.93521e-10	9.28856	9.10044	150
Chr1A	168327460	168327635	Infected_peak_81	35.5731	+	1	175	0	TraesCS1A03G0325400	4.15102	1.15502e-11	1.95632e-11	10.9374	10.7086	175
Chr1A	171636066	171636241	Infected_peak_82	75.8843	+	1	175	0	TraesCS1A03G0329700	3.9037	4.71439e-24	1.43398e-23	23.3266	22.8435	175
Chr1A	174172076	174172196	Infected_peak_83	56.612	+	1	120	0	TraesCS1A03G0331200	3.95032	3.90271e-18	9.08022e-18	17.4086	17.0419	120
Chr1A	175938500	175938675	Infected_peak_84	57.1314	+	1	175	0	TraesCS1A03G0331900	4.47928	2.70352e-18	6.33469e-18	17.5681	17.1983	175
Chr1A	178408946	178409524	Infected_peak_85	100.028	+	2	116284	0,294	TraesCS1A03G0333400	4.75449	1.86365e-31	7.73879e-31	30.7296	30.1113	578
Chr1A	183878136	183878286	Infected_peak_86	26.1422	+	1	150	0	TraesCS1A03G0337200	4.50948	9.41681e-09	1.3502e-08	8.0261	7.8696	150
Chr1A	183902653	183902878	Infected_peak_87	249.879	+	1	225	0	TraesCS1A03G0337200	5.11619	3.10585e-77	6.01116e-76	76.5078	75.221	225
Chr1A	190235144	190235194	Infected_peak_88	35.549	+	1	50	0	TraesCS1A03G0341100	4.03061	1.17486e-11	1.98917e-11	10.93	10.7013	50
Chr1A	211007183	211007258	Infected_peak_89	47.5432	+	1	75	0	TraesCS1A03G0352100	3.78383	2.38503e-15	4.87596e-15	14.6225	14.3119	75
Chr1A	224295764	224295914	Infected_peak_90	20.1405	+	1	150	0	TraesCS1A03G0362200,TraesCS1A03G0362300LC,TraesCS1A03G0362400LC	5.90364	6.81283e-07	8.65176e-07	6.16667	6.0629	150
Chr1A	226758480	226758759	Infected_peak_91	135.745	+	2	116,77	0,202	TraesCS1A03G0364800	4.55338	2.17828e-42	1.36969e-41	41.6619	40.8634	279
Chr1A	229181923	229182198	Infected_peak_92	87.1813	+	1	275	0	TraesCS1A03G0366300	4.69243	1.60923e-27	5.69931e-27	26.7934	26.2442	275
Chr1A	232058219	232058469	Infected_peak_93	79.6418	+	1	250	0	TraesCS1A03G0367900	5.35098	3.31253e-25	1.06029e-24	24.4798	23.9746	250
Chr1A	235804824	235805249	Infected_peak_94	265.501	+	1	425	0	TraesCS1A03G0370700	4.13684	5.38365e-82	1.19174e-80	81.2689	79.9238	425
Chr1A	236123975	236124244	Infected_peak_95	291.142	+	1	269	0	TraesCS1A03G0371000	4.96186	7.80507e-90	2.27826e-88	89.1076	87.6424	269
Chr1A	237547286	237547530	Infected_peak_96	161.417	+	1	244	0	TraesCS1A03G0371800	6.78453	3.08615e-50	2.56185e-49	49.5106	48.5914	244
Chr1A	238581822	238581922	Infected_peak_97	25.9239	+	1	100	0	TraesCS1A03G0372800	5.36802	1.09969e-08	1.57083e-08	7.95873	7.80387	100
Chr1A	243842548	243842998	Infected_peak_98	204.222	+	1	450	0	TraesCS1A03G0381000	4.81626	2.63187e-63	3.33445e-62	62.5797	61.477	450
Chr1A	244627914	244628014	Infected_peak_99	17.8459	+	1	100	0	TraesCS1A03G0381500	5.1175	3.53508e-06	4.24485e-06	5.4516	5.37214	100
Chr1A	250844743	250844918	Infected_peak_100	30.6578	+	1	175	0	TraesCS1A03G0387200	4.43118	3.80005e-10	5.90297e-10	9.42021	9.22893	175
Chr1A	253237090	253237415	Infected_peak_101	46.3888	+	1	325	0	TraesCS1A03G0391400	5.10295	5.39846e-15	1.0854e-14	14.2677	13.9644	325
Chr1A	255610572	255610687	Infected_peak_102	33.4324	+	1	115	0	TraesCS1A03G0396400	4.18084	5.29602e-11	8.62662e-11	10.2761	10.0642	115
Chr1A	256268122	256268197	Infected_peak_103	14.8242	+	1	75	0	TraesCS1A03G0397200	4.78006	3.09816e-05	3.44725e-05	4.5089	4.46253	75
Chr1A	257370402	257370627	Infected_peak_104	48.9977	+	1	225	0	TraesCS1A03G0398900	3.96262	8.54316e-16	1.77914e-15	15.0684	14.7498	225
Chr1A	258689908	258689983	Infected_peak_105	43.9165	+	1	75	0	TraesCS1A03G0402000	3.81281	3.1127e-14	6.0231e-14	13.5069	13.2202	75
Chr1A	258695833	258695931	Infected_peak_106	57.1702	+	1	98	0	TraesCS1A03G0402100	4.77611	2.63018e-18	6.16689e-18	17.58	17.2099	98
Chr1A	260937728	260937903	Infected_peak_107	60.4596	+	1	175	0	TraesCS1A03G0405700	4.11931	2.56759e-19	6.30739e-19	18.5905	18.2002	175
Chr1A	263022511	263023281	Infected_peak_108	81.4891	+	2	247,3	0,767	TraesCS1A03G0407700	5.49149	8.96336e-26	2.94666e-25	25.0475	24.5307	770
Chr1A	264720362	264720562	Infected_peak_109	285.336	+	1	200	0	TraesCS1A03G0409400	5.47079	4.7238e-88	1.27471e-86	87.3257	85.8946	200
Chr1A	269002195	269002415	Infected_peak_110	83.7162	+	1	220	0	TraesCS1A03G0412000	4.59598	1.86131e-26	6.29385e-26	25.7302	25.2011	220
Chr1A	269659302	269659452	Infected_peak_111	47.2217	+	1	150	0	TraesCS1A03G0413200	4.41542	2.99661e-15	6.0935e-15	14.5234	14.2151	150
Chr1A	270781258	270781583	Infected_peak_112	156.521	+	1	325	0	TraesCS1A03G0413800	5.06224	9.68792e-49	7.62737e-48	48.0138	47.1176	325
Chr1A	270788636	270788796	Infected_peak_113	69.6653	+	1	160	0	TraesCS1A03G0413900	4.0916	3.80895e-22	1.06818e-21	21.4192	20.9714	160
Chr1A	271848431	271848551	Infected_peak_114	45.5124	+	1	120	0	TraesCS1A03G0414800	4.9075	1.00539e-14	1.99248e-14	13.9977	13.7006	120
Chr1A	278764224	278764373	Infected_peak_115	118.628	+	1	149	0	TraesCS1A03G0419500	5.38461	3.72798e-37	1.94727e-36	36.4285	35.7106	149
Chr1A	278870286	278870336	Infected_peak_116	20.4929	+	1	50	0	TraesCS1A03G0419600	4.17482	5.29649e-07	6.77671e-07	6.27601	6.16898	50
Chr1A	281530532	281530707	Infected_peak_117	78.1575	+	1	175	0	TraesCS1A03G0425300	4.31366	9.46054e-25	2.96653e-24	24.0241	23.5278	175
Chr1A	281616716	281616816	Infected_peak_118	11.8958	+	1	100	0	TraesCS1A03G0425600	5.73134	0.000253563	0.000262422	3.59591	3.581	100
Chr1A	283145503	283145703	Infected_peak_119	39.2728	+	1	200	0	TraesCS1A03G0426800LC	5.57421	8.35756e-13	1.50564e-12	12.0779	11.8223	200
Chr1A	284334568	284334668	Infected_peak_120	18.5491	+	1	100	0	TraesCS1A03G0428100	5.026	2.12911e-06	2.60706e-06	5.6718	5.58385	100
Chr1A	285920450	285920550	Infected_peak_121	46.0189	+	1	100	0	TraesCS1A03G0428800	4.17899	7.02455e-15	1.40256e-14	14.1534	13.8531	100
Chr1A	290665436	290665682	Infected_peak_122	215.556	+	1	246	0	TraesCS1A03G0434100	5.09082	9.09889e-67	1.29207e-65	66.041	64.8887	246
Chr1A	291916579	291916754	Infected_peak_123	44.5034	+	1	175	0	TraesCS1A03G0435600	4.02789	2.05458e-14	4.00994e-14	13.6873	13.3969	175
Chr1A	291990495	291990610	Infected_peak_124	79.8324	+	1	115	0	TraesCS1A03G0435700	4.62627	2.89696e-25	9.29107e-25	24.5381	24.0319	115
Chr1A	293039540	293039640	Infected_peak_125	16.1073	+	1	100	0	TraesCS1A03G0438300	4.70662	1.22968e-05	1.4165e-05	4.91021	4.84878	100
Chr1A	295491832	295492045	Infected_peak_126	53.8154	+	1	213	0	TraesCS1A03G0442400	5.61374	2.82679e-17	6.30906e-17	16.5487	16.2	213
Chr1A	297221909	297222084	Infected_peak_127	91.9473	+	1	175	0	TraesCS1A03G0445000	4.08782	5.5473e-29	2.09463e-28	28.2559	27.6789	175
Chr1A	299863159	299863348	Infected_peak_128	259.749	+	1	189	0	TraesCS1A03G0448800	4.94074	3.07438e-80	6.42348e-79	79.5122	78.1922	189
Chr1A	300308701	300308851	Infected_peak_129	65.1953	+	1	150	0	TraesCS1A03G0449900	3.47838	9.02218e-21	2.3674e-20	20.0447	19.6257	150
Chr1A	300352848	300353066	Infected_peak_130	67.1041	+	1	218	0	TraesCS1A03G0450000	4.41672	2.33598e-21	6.30457e-21	20.6315	20.2003	218
Chr1A	301397012	301397212	Infected_peak_131	141.432	+	1	200	0	TraesCS1A03G0451800	5.01778	3.98491e-44	2.65919e-43	43.3996	42.5753	200
Chr1A	307320938	307321063	Infected_peak_132	28.9003	+	1	125	0	TraesCS1A03G0461300	3.9443	1.32331e-09	1.99592e-09	8.87834	8.69986	125
Chr1A	307824437	307824562	Infected_peak_133	41.0397	+	1	125	0	TraesCS1A03G0461600	4.54649	2.3906e-13	4.42409e-13	12.6215	12.3542	125
Chr1A	308350461	308350661	Infected_peak_134	25.9818	+	1	200	0	TraesCS1A03G0462400	7.17769	1.05533e-08	1.50903e-08	7.97661	7.8213	200
Chr1A	309906818	309906893	Infected_peak_135	56.5587	+	1	75	0	TraesCS1A03G0464100	4.01114	4.05385e-18	9.42205e-18	17.3921	17.0259	75
Chr1A	309906918	309907168	Infected_peak_136	67.6669	+	1	250	0	TraesCS1A03G0464100	5.82272	1.56993e-21	4.26802e-21	20.8041	20.3698	250
Chr1A	311480200	311480300	Infected_peak_137	16.4253	+	1	100	0	TraesCS1A03G0468700,TraesCS1A03G0468800LC	5.30084	9.77632e-06	1.13627e-05	5.00982	4.94452	100
Chr1A	311939973	311940242	Infected_peak_138	140.451	+	1	269	0	TraesCS1A03G0469000	3.97037	7.9302e-44	5.24686e-43	43.1007	42.2801	269
Chr1A	322519787	322519912	Infected_peak_139	16.6549	+	1	125	0	TraesCS1A03G0480300	4.43804	8.29176e-06	9.69144e-06	5.08135	5.01361	125
Chr1A	322524664	322524836	Infected_peak_140	37.428	+	1	172	0	TraesCS1A03G0480400LC	4.49693	3.09126e-12	5.40812e-12	11.5099	11.267	172
Chr1A	327804487	327804662	Infected_peak_141	87.945	+	1	175	0	TraesCS1A03G0486900	3.76407	9.38007e-28	3.35668e-27	27.0278	26.4741	175
Chr1A	327804937	327805037	Infected_peak_142	65.38	+	1	100	0	TraesCS1A03G0486900	4.04621	7.9073e-21	2.08281e-20	20.102	19.6814	100
Chr1A	327805087	327805179	Infected_peak_143	42.1759	+	1	92	0	TraesCS1A03G0486900	4.26196	1.06846e-13	2.01276e-13	12.9712	12.6962	92
Chr1A	328602138	328602438	Infected_peak_144	132.415	+	1	300	0	TraesCS1A03G0487400,TraesCS1A03G0487700	4.98048	2.27212e-41	1.37777e-40	40.6436	39.8608	300
Chr1A	329114221	329114521	Infected_peak_145	391.436	+	1	300	0	TraesCS1A03G0488800,TraesCS1A03G0488900	6.57518	2.00993e-120	1.46553e-118	119.697	117.834	300
Chr1A	329122447	329122521	Infected_peak_146	43.3302	+	1	74	0	TraesCS1A03G0489000	3.83962	4.7118e-14	9.04294e-14	13.3268	13.0437	74
Chr1A	329836954	329837179	Infected_peak_147	54.5901	+	1	225	0	TraesCS1A03G0489900	4.16946	1.63199e-17	3.68756e-17	16.7873	16.4333	225
Chr1A	331660516	331660641	Infected_peak_148	39.3358	+	1	125	0	TraesCS1A03G0490900	4.37582	7.99112e-13	1.44122e-12	12.0974	11.8413	125
Chr1A	335441040	335441240	Infected_peak_149	70.1941	+	1	200	0	TraesCS1A03G0494600	4.52147	2.61701e-22	7.40422e-22	21.5822	21.1305	200
Chr1A	337379371	337379596	Infected_peak_150	232.475	+	1	225	0	TraesCS1A03G0499300,TraesCS1A03G0499400	6.06204	6.403e-72	1.04269e-70	71.1936	69.9818	225
Chr1A	343434652	343434851	Infected_peak_151	28.7788	+	1	199	0	TraesCS1A03G0506600	5.11403	1.44224e-09	2.17126e-09	8.84096	8.66329	199
Chr1A	347346325	347346375	Infected_peak_152	11.7505	+	1	50	0	TraesCS1A03G0513200	5.73317	0.000281514	0.000290235	3.5505	3.53725	50
Chr1A	347348409	347348595	Infected_peak_153	159.942	+	1	186	0	TraesCS1A03G0513200	4.11494	8.71373e-50	7.12412e-49	49.0598	48.1473	186
Chr1A	349166481	349166606	Infected_peak_154	161.733	+	1	125	0	TraesCS1A03G0515200	3.93343	2.47094e-50	2.05881e-49	49.6071	48.6864	125
Chr1A	352286633	352286683	Infected_peak_155	46.6225	+	1	50	0	TraesCS1A03G0519800	3.70063	4.57556e-15	9.23069e-15	14.3396	14.0348	50
Chr1A	352289091	352289341	Infected_peak_156	142.858	+	1	250	0	TraesCS1A03G0519800	3.81757	1.46216e-44	9.89393e-44	43.835	43.0046	250
Chr1A	354387331	354387506	Infected_peak_157	48.0499	+	1	175	0	TraesCS1A03G0524500	4.42779	1.66463e-15	3.43185e-15	14.7787	14.4645	175
Chr1A	357137647	357137747	Infected_peak_158	7.65695	+	1	100	0	TraesCS1A03G0529400	0.655667	0.00485441	0.00495481	2.31386	2.30497	100
Chr1A	357141281	357141456	Infected_peak_159	59.288	+	1	175	0	TraesCS1A03G0529400	4.08572	5.88e-19	1.42081e-18	18.2306	17.8475	175
Chr1A	357903687	357903762	Infected_peak_160	17.004	+	1	75	0	TraesCS1A03G0530600	4.2126	6.45682e-06	7.60849e-06	5.18998	5.1187	75
Chr1A	357984118	357984343	Infected_peak_161	186.821	+	1	225	0	TraesCS1A03G0531000	4.76482	5.41269e-58	5.77268e-57	57.2666	56.2386	225
Chr1A	362824534	362824609	Infected_peak_162	21.0449	+	1	75	0	TraesCS1A03G0536900	4.43817	3.57142e-07	4.6223e-07	6.44716	6.33514	75
Chr1A	366512827	366513077	Infected_peak_163	118.234	+	1	250	0	TraesCS1A03G0542000	4.25588	4.91795e-37	2.55836e-36	36.3082	35.592	250
Chr1A	369626996	369627221	Infected_peak_164	97.9239	+	1	225	0	TraesCS1A03G0546300	4.72217	8.22252e-31	3.32625e-30	30.085	29.478	225
Chr1A	370168784	370168834	Infected_peak_165	13.4152	+	1	50	0	TraesCS1A03G0547200	7.45505	8.56564e-05	9.15445e-05	4.06724	4.03837	50
Chr1A	370238703	370238871	Infected_peak_166	83.7403	+	1	168	0	TraesCS1A03G0547700	4.96362	1.8298e-26	6.18966e-26	25.7376	25.2083	168
Chr1A	370252451	370252571	Infected_peak_167	37.1467	+	1	120	0	TraesCS1A03G0547800	4.13979	3.77256e-12	6.57237e-12	11.4234	11.1823	120
Chr1A	370475740	370475940	Infected_peak_168	47.2871	+	1	200	0	TraesCS1A03G0548300	4.32746	2.86148e-15	5.82337e-15	14.5434	14.2348	200
Chr1A	371115665	371115715	Infected_peak_169	11.721	+	1	50	0	TraesCS1A03G0550700	5.72538	0.000287554	0.000296227	3.54128	3.52838	50
Chr1A	371510996	371511296	Infected_peak_170	192.615	+	1	300	0	TraesCS1A03G0551300	4.71957	9.14298e-60	1.04032e-58	59.0389	57.9828	300
Chr1A	373642547	373642697	Infected_peak_171	59.409	+	1	150	0	TraesCS1A03G0554200	3.9013	5.39822e-19	1.30651e-18	18.2677	17.8839	150
Chr1A	377899629	377899804	Infected_peak_172	24.0225	+	1	175	0	TraesCS1A03G0561200	9.7374	4.2596e-08	5.86824e-08	7.37063	7.23149	175
Chr1A	378247896	378248021	Infected_peak_173	14.581	+	1	125	0	TraesCS1A03G0561900LC	6.5158	3.69341e-05	4.08034e-05	4.43257	4.3893	125
Chr1A	382471477	382471777	Infected_peak_174	138.828	+	1	300	0	TraesCS1A03G0568200	5.64355	2.48113e-43	1.61644e-42	42.6054	41.7914	300
Chr1A	383314795	383314870	Infected_peak_175	13.6423	+	1	75	0	TraesCS1A03G0569000	5.24321	7.26844e-05	7.82095e-05	4.13856	4.10674	75
Chr1A	385955417	385955592	Infected_peak_176	45.4944	+	1	175	0	TraesCS1A03G0571800	4.57534	1.01829e-14	2.0176e-14	13.9921	13.6952	175
Chr1A	387291570	387291745	Infected_peak_177	21.0509	+	1	175	0	TraesCS1A03G0573200	9.4869	3.55624e-07	4.6032e-07	6.44901	6.33694	175
Chr1A	387521787	387521937	Infected_peak_178	98.7333	+	1	150	0	TraesCS1A03G0573400	4.10168	4.64321e-31	1.89808e-30	30.3332	29.7217	150
Chr1A	388979535	388979633	Infected_peak_179	64.3442	+	1	98	0	TraesCS1A03G0575100	3.82884	1.6494e-20	4.27028e-20	19.7827	19.3695	98
Chr1A	389131118	389131193	Infected_peak_180	30.7654	+	1	75	0	TraesCS1A03G0575400	4.43367	3.51928e-10	5.47873e-10	9.45355	9.26132	75
Chr1A	390675753	390675853	Infected_peak_181	74.4981	+	1	100	0	TraesCS1A03G0577200	3.91357	1.25352e-23	3.74839e-23	22.9019	22.4262	100
Chr1A	391702336	391702603	Infected_peak_182	110.696	+	1	267	0	TraesCS1A03G0578400	4.818	1.00297e-34	4.75378e-34	33.9987	33.323	267
Chr1A	392837628	392837753	Infected_peak_183	21.3136	+	1	125	0	TraesCS1A03G0579500	6.59048	2.94639e-07	3.83688e-07	6.53071	6.41602	125
Chr1A	393378952	393379277	Infected_peak_184	300.286	+	1	325	0	TraesCS1A03G0580200	4.83154	1.25516e-92	4.02553e-91	91.9013	90.3952	325
Chr1A	394216147	394216197	Infected_peak_185	4.71759	+	1	50	0	TraesCS1A03G0583200,TraesCS1A03G0583300	0.155293	0.0376369	0.0380071	1.42439	1.42014	50
Chr1A	394216372	394216547	Infected_peak_186	25.7833	+	1	175	0	TraesCS1A03G0583200,TraesCS1A03G0583300	4.18483	1.21506e-08	1.73161e-08	7.9154	7.76155	175
Chr1A	396847296	396847346	Infected_peak_187	5.56693	+	1	50	0	TraesCS1A03G0587800	0.158419	0.0206986	0.0210954	1.68406	1.67581	50
Chr1A	396855600	396855800	Infected_peak_188	151.128	+	1	200	0	TraesCS1A03G0587800	5.13104	4.31011e-47	3.20549e-46	46.3655	45.4941	200
Chr1A	400900311	400900624	Infected_peak_189	240.547	+	1	313	0	TraesCS1A03G0593200LC,TraesCS1A03G0593300	5.76379	2.18193e-74	3.87456e-73	73.6612	72.4118	313
Chr1A	401541133	401541358	Infected_peak_190	37.8573	+	1	225	0	TraesCS1A03G0594700LC	5.52777	2.27953e-12	4.01632e-12	11.6422	11.3962	225
Chr1A	403910931	403911131	Infected_peak_191	43.5705	+	1	200	0	TraesCS1A03G0597000	5.80325	3.97424e-14	7.65535e-14	13.4007	13.116	200
Chr1A	404457979	404458116	Infected_peak_192	28.2828	+	1	137	0	TraesCS1A03G0597500	4.1736	2.05173e-09	3.06226e-09	8.68788	8.51396	137
Chr1A	404578945	404579195	Infected_peak_193	275.054	+	1	250	0	TraesCS1A03G0597600	5.09264	6.45509e-85	1.58616e-83	84.1901	82.7997	250
Chr1A	410118185	410118285	Infected_peak_194	53.3856	+	1	100	0	TraesCS1A03G0606500	4.25761	3.84089e-17	8.4981e-17	16.4156	16.0707	100
Chr1A	411457993	411458115	Infected_peak_195	85.5466	+	1	122	0	TraesCS1A03G0607800	4.42927	5.10782e-27	1.76971e-26	26.2918	25.7521	122
Chr1A	411775265	411775365	Infected_peak_196	59.8945	+	1	100	0	TraesCS1A03G0608300	3.73893	3.82897e-19	9.33162e-19	18.4169	18.03	100
Chr1A	415392996	415393046	Infected_peak_197	22.5235	+	1	50	0	TraesCS1A03G0610200	4.64507	1.24162e-07	1.65859e-07	6.90601	6.78026	50
Chr1A	417238687	417238737	Infected_peak_198	47.2323	+	1	50	0	TraesCS1A03G0611000	4.3583	2.9742e-15	6.04863e-15	14.5266	14.2183	50
Chr1A	427585998	427586248	Infected_peak_199	235.081	+	1	250	0	TraesCS1A03G0622000	5.17782	1.01528e-72	1.71265e-71	71.9934	70.7663	250
Chr1A	428150487	428150562	Infected_peak_200	24.2095	+	1	75	0	TraesCS1A03G0622400	4.07033	3.72859e-08	5.15498e-08	7.42846	7.28777	75
Chr1A	428737676	428737776	Infected_peak_201	29.4928	+	1	100	0	TraesCS1A03G0623300,TraesCS1A03G0623400	4.53176	8.6878e-10	1.32366e-09	9.06109	8.87822	100
Chr1A	430400818	430400986	Infected_peak_202	143.53	+	1	168	0	TraesCS1A03G0625600	4.21741	9.11325e-45	6.21133e-44	44.0403	43.2068	168
Chr1A	430833615	430833790	Infected_peak_203	60.8665	+	1	175	0	TraesCS1A03G0626000	3.85526	1.92643e-19	4.75721e-19	18.7152	18.3226	175
Chr1A	432029083	432029233	Infected_peak_204	20.2932	+	1	150	0	TraesCS1A03G0627000	7.52834	6.1073e-07	7.78291e-07	6.21415	6.10886	150
Chr1A	432441923	432442148	Infected_peak_205	148.608	+	1	225	0	TraesCS1A03G0628200LC	4.32958	2.53304e-46	1.83869e-45	45.5964	44.7355	225
Chr1A	432446813	432446913	Infected_peak_206	16.0865	+	1	100	0	TraesCS1A03G0628300	5.26312	1.24822e-05	1.43711e-05	4.90371	4.84251	100
Chr1A	432452752	432452877	Infected_peak_207	52.9231	+	1	125	0	TraesCS1A03G0628300	4.09514	5.32457e-17	1.17097e-16	16.2737	15.9315	125
Chr1A	434034089	434034264	Infected_peak_208	46.8829	+	1	175	0	TraesCS1A03G0630100	5.01842	3.80597e-15	7.70597e-15	14.4195	14.1132	175
Chr1A	434602045	434602220	Infected_peak_209	25.1122	+	1	175	0	TraesCS1A03G0632000	4.58442	1.96031e-08	2.75718e-08	7.70768	7.55953	175
Chr1A	436501153	436501316	Infected_peak_210	45.4355	+	1	163	0	TraesCS1A03G0634400	4.77733	1.06137e-14	2.10157e-14	13.9741	13.6775	163
Chr1A	436737365	436737440	Infected_peak_211	36.0361	+	1	75	0	TraesCS1A03G0634500	4.40827	8.31659e-12	1.41925e-11	11.0801	10.8479	75
Chr1A	438273692	438273935	Infected_peak_212	93.79	+	1	243	0	TraesCS1A03G0637200,TraesCS1A03G0637300	6.22834	1.51384e-29	5.83961e-29	28.8199	28.2336	243
Chr1A	438286007	438286182	Infected_peak_213	112.772	+	1	175	0	TraesCS1A03G0637400	5.59744	2.32053e-35	1.12769e-34	34.6344	33.9478	175
Chr1A	440143015	440143090	Infected_peak_214	68.9497	+	1	75	0	TraesCS1A03G0638500	3.93459	6.3198e-22	1.75415e-21	21.1993	20.7559	75
Chr1A	441861728	441862047	Infected_peak_215	104.049	+	1	319	0	TraesCS1A03G0642300	4.67979	1.08966e-32	4.76632e-32	31.9627	31.3218	319
Chr1A	444382863	444383228	Infected_peak_216	151.392	+	1	365	0	TraesCS1A03G0647900,TraesCS1A03G0648000	7.12253	3.57972e-47	2.67007e-46	46.4462	45.5735	365
Chr1A	444389854	444390029	Infected_peak_217	36.2066	+	1	175	0	TraesCS1A03G0648200LC	4.55558	7.36265e-12	1.26104e-11	11.133	10.8993	175
Chr1A	445939857	445940182	Infected_peak_218	309.847	+	1	325	0	TraesCS1A03G0650500	5.85351	1.50657e-95	5.32936e-94	94.822	93.2733	325
Chr1A	446585467	446585567	Infected_peak_219	9.57822	+	1	100	0	TraesCS1A03G0652200	3.34273	0.00128079	0.00130818	2.89252	2.88333	100
Chr1A	447683959	447684009	Infected_peak_220	4.71759	+	1	50	0	TraesCS1A03G0653300	0.155293	0.0376369	0.0380071	1.42439	1.42014	50
Chr1A	447689980	447690124	Infected_peak_221	91.0645	+	1	144	0	TraesCS1A03G0653300	3.90523	1.0328e-28	3.86224e-28	27.986	27.4132	144
Chr1A	449430247	449430370	Infected_peak_222	20.0415	+	1	123	0	TraesCS1A03G0656200	4.54091	7.30951e-07	9.26605e-07	6.13611	6.03311	123
Chr1A	450714720	450714920	Infected_peak_223	146.075	+	1	200	0	TraesCS1A03G0657800	4.75628	1.51597e-45	1.06452e-44	44.8193	43.9728	200
Chr1A	450720512	450720737	Infected_peak_224	297.52	+	1	225	0	TraesCS1A03G0657900	4.43456	8.73865e-92	2.73872e-90	91.0586	89.5625	225
Chr1A	451292512	451292612	Infected_peak_225	18.4962	+	1	100	0	TraesCS1A03G0659500	4.90262	2.21272e-06	2.70457e-06	5.65507	5.5679	100
Chr1A	451340865	451340965	Infected_peak_226	13.7463	+	1	100	0	TraesCS1A03G0660000	5.25405	6.7422e-05	7.27706e-05	4.1712	4.13804	100
Chr1A	451343955	451344005	Infected_peak_227	23.1718	+	1	50	0	TraesCS1A03G0660000	4.4455	7.8171e-08	1.05823e-07	7.10695	6.97542	50
Chr1A	451720261	451720436	Infected_peak_228	75.7147	+	1	175	0	TraesCS1A03G0661700	3.79827	5.31143e-24	1.61284e-23	23.2748	22.7924	175
Chr1A	454838296	454838371	Infected_peak_229	4.63829	+	1	75	0	TraesCS1A03G0664700	0.154947	0.039914	0.0401545	1.39887	1.39627	75
Chr1A	456094014	456094154	Infected_peak_230	28.8058	+	1	140	0	TraesCS1A03G0666400	5.80734	1.41468e-09	2.13102e-09	8.84934	8.67141	140
Chr1A	456098947	456099109	Infected_peak_231	24.9559	+	1	162	0	TraesCS1A03G0666500	4.46199	2.1903e-08	3.07269e-08	7.6595	7.51248	162
Chr1A	456103975	456104175	Infected_peak_232	35.1111	+	1	200	0	TraesCS1A03G0666800	5.27243	1.60392e-11	2.69467e-11	10.7948	10.5695	200
Chr1A	456290934	456290984	Infected_peak_233	15.5864	+	1	50	0	TraesCS1A03G0667200	5.864	1.78787e-05	2.03249e-05	4.74766	4.69197	50
Chr1A	456792094	456792294	Infected_peak_234	253.823	+	1	200	0	TraesCS1A03G0667800	4.68336	1.97035e-78	3.90658e-77	77.7055	76.4082	200
Chr1A	458677129	458677279	Infected_peak_235	62.7757	+	1	150	0	TraesCS1A03G0669300	4.92928	5.00073e-20	1.2666e-19	19.301	18.8974	150
Chr1A	459116711	459116887	Infected_peak_236	36.9362	+	2	42,98	0,78	TraesCS1A03G0669500	5.13923	4.38142e-12	7.6049e-12	11.3584	11.1189	176
Chr1A	460248043	460248182	Infected_peak_237	115.526	+	1	139	0	TraesCS1A03G0671100	3.77842	3.33604e-36	1.67167e-35	35.4768	34.7768	139
Chr1A	460303314	460303453	Infected_peak_238	41.8611	+	1	139	0	TraesCS1A03G0671300	5.14259	1.33519e-13	2.50361e-13	12.8745	12.6014	139
Chr1A	460305083	460305133	Infected_peak_239	13.8231	+	1	50	0	TraesCS1A03G0671500	5.48931	6.37874e-05	6.89977e-05	4.19527	4.16117	50
Chr1A	460307209	460307359	Infected_peak_240	94.495	+	1	150	0	TraesCS1A03G0671500	3.92361	9.20435e-30	3.58228e-29	29.036	28.4458	150
Chr1A	462397716	462397866	Infected_peak_241	27.4046	+	1	150	0	TraesCS1A03G0674500	4.27642	3.83434e-09	5.62832e-09	8.41631	8.24962	150
Chr1A	463052777	463053064	Infected_peak_242	145.354	+	2	161,14	0,273	TraesCS1A03G0676100	3.77921	2.51917e-45	1.7538e-44	44.5987	43.756	287
Chr1A	463066478	463066628	Infected_peak_243	31.2349	+	1	150	0	TraesCS1A03G0676300	4.51051	2.52154e-10	3.95686e-10	9.59833	9.40265	150
Chr1A	463087960	463088010	Infected_peak_244	27.8393	+	1	50	0	TraesCS1A03G0676500	4.34978	2.81474e-09	4.16418e-09	8.55056	8.38047	50
Chr1A	465512898	465513023	Infected_peak_245	13.9763	+	1	125	0	TraesCS1A03G0682300	7.63371	5.70188e-05	6.20445e-05	4.24398	4.2073	125
Chr1A	465526249	465526424	Infected_peak_246	99.492	+	1	175	0	TraesCS1A03G0682400	4.20885	2.72101e-31	1.12181e-30	30.5653	29.9501	175
Chr1A	466486444	466486619	Infected_peak_247	68.6783	+	1	175	0	TraesCS1A03G0685100	4.13444	7.66693e-22	2.11721e-21	21.1154	20.6742	175
Chr1A	467157249	467157624	Infected_peak_248	131.318	+	1	375	0	TraesCS1A03G0687700	5.81625	4.91704e-41	2.94758e-40	40.3083	39.5305	375
Chr1A	467192582	467192707	Infected_peak_249	50.8669	+	1	125	0	TraesCS1A03G0688000	4.35461	2.2808e-16	4.87022e-16	15.6419	15.3125	125
Chr1A	468581330	468581505	Infected_peak_250	24.0355	+	1	175	0	TraesCS1A03G0690100	8.00164	4.22069e-08	5.81554e-08	7.37462	7.23541	175
Chr1A	468864900	468865065	Infected_peak_251	84.7013	+	1	165	0	TraesCS1A03G0691100	5.11575	9.28412e-27	3.17967e-26	26.0323	25.4976	165
Chr1A	470513096	470513246	Infected_peak_252	15.0882	+	1	150	0	TraesCS1A03G0693600	4.72906	2.56109e-05	2.87076e-05	4.59158	4.542	150
Chr1A	474671803	474672003	Infected_peak_253	193.017	+	1	200	0	TraesCS1A03G0701100	4.28225	6.88566e-60	7.86983e-59	59.1621	58.104	200
Chr1A	482032248	482032419	Infected_peak_254	82.232	+	1	171	0	TraesCS1A03G0711700	4.11846	5.30478e-26	1.76077e-25	25.2753	24.7543	171
Chr1A	482153219	482153369	Infected_peak_255	47.561	+	1	150	0	TraesCS1A03G0712000	4.44468	2.35457e-15	4.81644e-15	14.6281	14.3173	150
Chr1A	482349103	482349228	Infected_peak_256	15.04	+	1	125	0	TraesCS1A03G0713800	5.76139	2.65185e-05	2.96821e-05	4.57645	4.5275	125
Chr1A	482351334	482351434	Infected_peak_257	25.4738	+	1	100	0	TraesCS1A03G0713800	4.00869	1.5149e-08	2.14591e-08	7.81962	7.66839	100
Chr1A	482433293	482433643	Infected_peak_258	98.9945	+	1	350	0	TraesCS1A03G0714500,TraesCS1A03G0714700LC	5.69444	3.86714e-31	1.58374e-30	30.4126	29.8003	350
Chr1A	483230669	483230844	Infected_peak_259	18.0912	+	1	175	0	TraesCS1A03G0716600	8.59587	2.95831e-06	3.58092e-06	5.52896	5.44601	175
Chr1A	483254654	483254704	Infected_peak_260	56.4667	+	1	50	0	TraesCS1A03G0716700	3.58367	4.32693e-18	1.00424e-17	17.3638	16.9982	50
Chr1A	487920397	487920561	Infected_peak_261	67.4176	+	1	164	0	TraesCS1A03G0725700	4.22548	1.87258e-21	5.07306e-21	20.7276	20.2947	164
Chr1A	488393299	488393374	Infected_peak_262	15.7909	+	1	75	0	TraesCS1A03G0727700	8.32942	1.54464e-05	1.76383e-05	4.81117	4.75354	75
Chr1A	488471971	488472171	Infected_peak_263	30.4433	+	1	200	0	TraesCS1A03G0728000	5.64938	4.42357e-10	6.8495e-10	9.35423	9.16434	200
Chr1A	489640745	489640957	Infected_peak_264	456.13	+	1	212	0	TraesCS1A03G0731300	5.13365	3.60185e-140	4.91171e-138	139.443	137.309	212
Chr1A	491867169	491867341	Infected_peak_265	51.6172	+	1	172	0	TraesCS1A03G0736800	4.86745	1.34108e-16	2.89512e-16	15.8725	15.5383	172
Chr1A	491964935	491964985	Infected_peak_266	14.6525	+	1	50	0	TraesCS1A03G0737000,TraesCS1A03G0737100LC	6.42562	3.50889e-05	3.88297e-05	4.45483	4.41084	50
Chr1A	494745571	494745771	Infected_peak_267	54.5888	+	1	200	0	TraesCS1A03G0742600	4.19408	1.63363e-17	3.69081e-17	16.7868	16.4329	200
Chr1A	494751467	494751592	Infected_peak_268	25.0739	+	1	125	0	TraesCS1A03G0742700	4.69831	2.01423e-08	2.83146e-08	7.69589	7.54799	125
Chr1A	495349866	495349966	Infected_peak_269	47.7578	+	1	100	0	TraesCS1A03G0744900	3.95188	2.04889e-15	4.20223e-15	14.6885	14.3765	100
Chr1A	496968684	496968857	Infected_peak_270	51.4124	+	1	173	0	TraesCS1A03G0749100	3.84499	1.55035e-16	3.33681e-16	15.8096	15.4767	173
Chr1A	497223672	497223922	Infected_peak_271	57.7885	+	1	250	0	TraesCS1A03G0749900	5.45951	1.69767e-18	4.01738e-18	17.7701	17.3961	250
Chr1A	497814035	497814210	Infected_peak_272	77.8611	+	1	175	0	TraesCS1A03G0752900	4.43896	1.16736e-24	3.6432e-24	23.9328	23.4385	175
Chr1A	499031287	499031407	Infected_peak_273	42.4955	+	1	120	0	TraesCS1A03G0756800	4.31612	8.52104e-14	1.61284e-13	13.0695	12.7924	120
Chr1A	499560265	499560428	Infected_peak_274	27.6697	+	1	163	0	TraesCS1A03G0759800	5.33119	3.17487e-09	4.68378e-09	8.49827	8.3294	163
Chr1A	499647106	499647356	Infected_peak_275	157.022	+	1	250	0	TraesCS1A03G0760300	4.53288	6.8209e-49	5.39153e-48	48.1662	47.2683	250
Chr1A	500039565	500039686	Infected_peak_276	16.6736	+	1	121	0	TraesCS1A03G0761500	4.52828	8.18098e-06	9.56634e-06	5.08719	5.01925	121
Chr1A	500312952	500313027	Infected_peak_277	41.8435	+	1	75	0	TraesCS1A03G0763600	3.82312	1.352e-13	2.53433e-13	12.869	12.5961	75
Chr1A	500687815	500687990	Infected_peak_278	120.789	+	1	175	0	TraesCS1A03G0764000	4.44198	8.10629e-38	4.3526e-37	37.0912	36.3613	175
Chr1A	503189325	503189525	Infected_peak_279	56.3686	+	1	200	0	TraesCS1A03G0771200LC,TraesCS1A03G0771300LC	4.34541	4.63902e-18	1.07486e-17	17.3336	16.9686	200
Chr1A	504795923	504796248	Infected_peak_280	43.3136	+	1	325	0	TraesCS1A03G0773400	10.3274	4.76729e-14	9.14746e-14	13.3217	13.0387	325
Chr1A	504853182	504853482	Infected_peak_281	107.415	+	1	300	0	TraesCS1A03G0773900	5.45795	1.00984e-33	4.62324e-33	32.9957	32.3351	300
Chr1A	508506003	508506178	Infected_peak_282	40.2841	+	1	175	0	TraesCS1A03G0782500	4.78729	4.08166e-13	7.46924e-13	12.3892	12.1267	175
Chr1A	509698194	509698369	Infected_peak_283	36.8067	+	1	175	0	TraesCS1A03G0784800	4.77555	4.8074e-12	8.31923e-12	11.3181	11.0799	175
Chr1A	510451396	510452283	Infected_peak_284	83.5782	+	2	43157	0,730	TraesCS1A03G0788500LC	5.38721	2.05051e-26	6.92577e-26	25.6881	25.1595	887
Chr1A	512954508	512954633	Infected_peak_285	28.0527	+	1	125	0	TraesCS1A03G0794600	5.29984	2.41687e-09	3.59162e-09	8.61675	8.44471	125
Chr1A	514120625	514120750	Infected_peak_286	62.6028	+	1	125	0	TraesCS1A03G0796800	5.5386	5.6541e-20	1.42783e-19	19.2476	18.8453	125
Chr1A	515396472	515396547	Infected_peak_287	14.0462	+	1	75	0	TraesCS1A03G0801800	5.32055	5.4216e-05	5.91099e-05	4.26587	4.22834	75
Chr1A	518119593	518119743	Infected_peak_288	28.2492	+	1	150	0	TraesCS1A03G0808700	4.28292	2.10153e-09	3.13422e-09	8.67746	8.50387	150
Chr1A	518121204	518121379	Infected_peak_289	155.365	+	1	175	0	TraesCS1A03G0808700	3.80292	2.18066e-48	1.69962e-47	47.6614	46.7696	175
Chr1A	518315449	518315499	Infected_peak_290	21.9729	+	1	50	0	TraesCS1A03G0809600	5.98177	1.84077e-07	2.42934e-07	6.735	6.61451	50
Chr1A	518458737	518459012	Infected_peak_291	193.08	+	1	275	0	TraesCS1A03G0810700	5.21277	6.58733e-60	7.53368e-59	59.1813	58.123	275
Chr1A	520996433	520996558	Infected_peak_292	117.366	+	1	125	0	TraesCS1A03G0819200	3.74781	9.07472e-37	4.67043e-36	36.0422	35.3306	125
Chr1A	520996633	520996683	Infected_peak_293	35.3112	+	1	50	0	TraesCS1A03G0819200	3.81477	1.39275e-11	2.34562e-11	10.8561	10.6297	50
Chr1A	521008241	521008579	Infected_peak_294	118.603	+	1	338	0	TraesCS1A03G0819300	5.01721	3.79445e-37	1.98141e-36	36.4209	35.703	338
Chr1A	521365714	521365882	Infected_peak_295	312.136	+	1	168	0	TraesCS1A03G0820700	5.25692	2.99167e-96	1.09068e-94	95.5241	93.9623	168
Chr1A	522520813	522520938	Infected_peak_296	19.6962	+	1	125	0	TraesCS1A03G0824000	4.76669	9.36141e-07	1.17719e-06	6.02866	5.92915	125
Chr1A	523001761	523001836	Infected_peak_297	13.0873	+	1	75	0	TraesCS1A03G0825700	4.40537	0.000108387	0.000114902	3.96502	3.93967	75
Chr1A	523019486	523019611	Infected_peak_298	40.1421	+	1	125	0	TraesCS1A03G0826100	4.37533	4.51505e-13	8.24207e-13	12.3453	12.084	125
Chr1A	523362822	523363022	Infected_peak_299	93.3741	+	1	200	0	TraesCS1A03G0827300	3.71155	2.02973e-29	7.79095e-29	28.6926	28.1084	200
Chr1A	523948689	523948789	Infected_peak_300	15.0151	+	1	100	0	TraesCS1A03G0829100	4.98298	2.70102e-05	3.02003e-05	4.56847	4.51999	100
Chr1A	524657120	524657270	Infected_peak_301	35.8984	+	1	150	0	TraesCS1A03G0830500	4.45909	9.1723e-12	1.56141e-11	11.0375	10.8065	150
Chr1A	528862616	528862816	Infected_peak_302	304.809	+	1	200	0	TraesCS1A03G0834600	4.85117	5.24334e-94	1.75078e-92	93.2804	91.7568	200
Chr1A	532177517	532177667	Infected_peak_303	38.0688	+	1	150	0	TraesCS1A03G0839500	4.2658	1.96137e-12	3.46847e-12	11.7074	11.4599	150
Chr1A	532887232	532887282	Infected_peak_304	15.3778	+	1	50	0	TraesCS1A03G0843600	7.98093	2.07795e-05	2.34866e-05	4.68236	4.62918	50
Chr1A	532897159	532897459	Infected_peak_305	50.1034	+	1	300	0	TraesCS1A03G0843600	5.04558	3.90893e-16	8.26772e-16	15.4079	15.0826	300
Chr1A	533282768	533282843	Infected_peak_306	25.8406	+	1	75	0	TraesCS1A03G0845300,TraesCS1A03G0845500	5.14791	1.1665e-08	1.66414e-08	7.93312	7.77881	75
Chr1A	533921701	533921930	Infected_peak_307	17.5474	+	2	46,79	0,150	TraesCS1A03G0847400LC	6.01963	4.37819e-06	5.2204e-06	5.35871	5.2823	229
Chr1A	533922704	533922754	Infected_peak_308	11.7113	+	1	50	0	TraesCS1A03G0847500	5.31393	0.000289537	0.000298218	3.5383	3.52547	50
Chr1A	534846287	534846462	Infected_peak_309	20.8843	+	1	175	0	TraesCS1A03G0851700	5.20019	4.00744e-07	5.16663e-07	6.39713	6.28679	175
Chr1A	534954388	534954438	Infected_peak_310	15.081	+	1	50	0	TraesCS1A03G0852200	4.52397	2.5743e-05	2.8852e-05	4.58934	4.53982	50
Chr1A	536770491	536770616	Infected_peak_311	36.8895	+	1	125	0	TraesCS1A03G0858500	4.96061	4.53143e-12	7.85536e-12	11.3438	11.1048	125
Chr1A	538124986	538125186	Infected_peak_312	12.8866	+	1	200	0	TraesCS1A03G0863800,TraesCS1A03G0863900	5.70996	0.000125152	0.000132057	3.90256	3.87924	200
Chr1A	538131495	538131617	Infected_peak_313	44.3225	+	1	122	0	TraesCS1A03G0863800,TraesCS1A03G0863900	4.19138	2.33437e-14	4.54558e-14	13.6318	13.3424	122
Chr1A	538382485	538382660	Infected_peak_314	23.3072	+	1	175	0	TraesCS1A03G0865500LC	7.87278	7.09567e-08	9.63492e-08	7.14901	7.01615	175
Chr1A	539216184	539216334	Infected_peak_315	199.6	+	1	150	0	TraesCS1A03G0868700	4.73709	6.73597e-62	8.21374e-61	61.1716	60.0855	150
Chr1A	539647521	539647621	Infected_peak_316	71.9667	+	1	100	0	TraesCS1A03G0869800	4.31635	7.47726e-23	2.167e-22	22.1263	21.6641	100
Chr1A	540570518	540570618	Infected_peak_317	18.5027	+	1	100	0	TraesCS1A03G0870900	4.35498	2.20192e-06	2.69234e-06	5.6572	5.56987	100
Chr1A	541519591	541519653	Infected_peak_318	61.1686	+	1	62	0	TraesCS1A03G0873200	3.83131	1.55681e-19	3.85849e-19	18.8078	18.4136	62
Chr1A	541811143	541811268	Infected_peak_319	99.0285	+	1	125	0	TraesCS1A03G0874200LC	4.02604	3.77282e-31	1.54688e-30	30.4233	29.8105	125
Chr1A	541908603	541908728	Infected_peak_320	56.5266	+	1	125	0	TraesCS1A03G0874700	4.13681	4.14771e-18	9.63396e-18	17.3822	17.0162	125
Chr1A	543734924	543734999	Infected_peak_321	13.7984	+	1	75	0	TraesCS1A03G0881300	5.46044	6.49335e-05	7.01865e-05	4.18753	4.15375	75
Chr1A	543888885	543889060	Infected_peak_322	39.8885	+	1	175	0	TraesCS1A03G0881700	4.35977	5.40751e-13	9.82603e-13	12.267	12.0076	175
Chr1A	545363525	545363849	Infected_peak_323	108.367	+	1	324	0	TraesCS1A03G0884800	5.51157	5.16591e-34	2.38892e-33	33.2869	32.6218	324
Chr1A	545699219	545699389	Infected_peak_324	51.3807	+	1	170	0	TraesCS1A03G0885700	4.18303	1.58532e-16	3.41084e-16	15.7999	15.4671	170
Chr1A	547248904	547248979	Infected_peak_325	73.5534	+	1	75	0	TraesCS1A03G0891800	3.9308	2.44013e-23	7.21459e-23	22.6126	22.1418	75
Chr1A	549620238	549620313	Infected_peak_326	16.3817	+	1	75	0	TraesCS1A03G0898900	4.90046	1.00882e-05	1.17114e-05	4.99619	4.93139	75
Chr1A	549643047	549643222	Infected_peak_327	54.6092	+	1	175	0	TraesCS1A03G0899300	4.28257	1.60932e-17	3.63909e-17	16.7934	16.439	175
Chr1A	549723796	549723996	Infected_peak_328	87.0336	+	1	200	0	TraesCS1A03G0900000	4.01881	1.78935e-27	6.31344e-27	26.7473	26.1997	200
Chr1A	550421381	550421572	Infected_peak_329	78.1528	+	1	191	0	TraesCS1A03G0902700	5.73119	9.4931e-25	2.97622e-24	24.0226	23.5263	191
Chr1A	552226581	552227236	Infected_peak_330	18.2196	+	2	7143	0,512	TraesCS1A03G0910500LC	6.06562	2.69885e-06	3.27618e-06	5.56882	5.48463	655
Chr1A	552314195	552314295	Infected_peak_331	14.0985	+	1	100	0	TraesCS1A03G0910900	5.58199	5.2231e-05	5.70083e-05	4.28207	4.24406	100
Chr1A	552317557	552317807	Infected_peak_332	71.213	+	1	250	0	TraesCS1A03G0910900	4.24577	1.27344e-22	3.65383e-22	21.895	21.4373	250
Chr1A	553420566	553420666	Infected_peak_333	29.9037	+	1	100	0	TraesCS1A03G0917300	4.12141	6.49525e-10	9.95634e-10	9.1874	9.0019	100
Chr1A	553520904	553521029	Infected_peak_334	48.8589	+	1	125	0	TraesCS1A03G0917900	3.63692	9.41839e-16	1.9589e-15	15.026	14.708	125
Chr1A	553793498	553793723	Infected_peak_335	45.9886	+	1	225	0	TraesCS1A03G0919900	5.24755	7.17634e-15	1.43238e-14	14.1441	13.8439	225
Chr1A	554079467	554079642	Infected_peak_336	113.649	+	1	175	0	TraesCS1A03G0920800	4.79425	1.24961e-35	6.13943e-35	34.9032	34.2119	175
Chr1A	556215032	556215107	Infected_peak_337	38.9202	+	1	75	0	TraesCS1A03G0927400	4.20351	1.0727e-12	1.92242e-12	11.9695	11.7162	75
Chr1A	557630525	557630725	Infected_peak_338	139.26	+	1	200	0	TraesCS1A03G0940900	3.79465	1.83244e-43	1.19863e-42	42.737	41.9213	200
Chr1A	560669130	560669255	Infected_peak_339	43.014	+	1	125	0	TraesCS1A03G0955000	4.11899	5.89414e-14	1.12589e-13	13.2296	12.9485	125
Chr1A	564183001	564183216	Infected_peak_340	127.409	+	1	215	0	TraesCS1A03G0966000	5.0028	7.71156e-40	4.42671e-39	39.1129	38.3539	215
Chr1A	565099159	565099409	Infected_peak_341	100.516	+	1	250	0	TraesCS1A03G0968200	4.96061	1.32092e-31	5.51846e-31	30.8791	30.2582	250
Chr1A	565112541	565112716	Infected_peak_342	30.7561	+	1	175	0	TraesCS1A03G0968400	5.5373	3.54239e-10	5.51423e-10	9.4507	9.25852	175
Chr1A	565882120	565882295	Infected_peak_343	39.7958	+	1	175	0	TraesCS1A03G0972300	6.71769	5.77339e-13	1.04781e-12	12.2386	11.9797	175
Chr1A	566280634	566280784	Infected_peak_344	15.4167	+	1	150	0	TraesCS1A03G0974300	6.74037	2.02012e-05	2.28619e-05	4.69462	4.64089	150
Chr1A	566296000	566296192	Infected_peak_345	23.0176	+	2	38,37	0,155	TraesCS1A03G0974500	4.99576	8.73473e-08	1.17764e-07	7.05875	6.92899	192
Chr1A	566298343	566298393	Infected_peak_346	47.8319	+	1	50	0	TraesCS1A03G0974500	3.73457	1.94488e-15	3.99165e-15	14.7111	14.3988	50
Chr1A	566475149	566475438	Infected_peak_347	305.972	+	1	289	0	TraesCS1A03G0975700	4.65287	2.30359e-94	7.82344e-93	93.6376	92.1066	289
Chr1A	566505905	566506143	Infected_peak_348	218.043	+	1	238	0	TraesCS1A03G0975800	4.59952	1.58553e-67	2.30463e-66	66.7998	65.6374	238
Chr1A	568194750	568194900	Infected_peak_349	22.6838	+	1	150	0	TraesCS1A03G0983600	4.23544	1.10754e-07	1.4842e-07	6.95564	6.82851	150
Chr1A	569783527	569783724	Infected_peak_350	100.533	+	1	197	0	TraesCS1A03G0987600	5.09297	1.304e-31	5.4503e-31	30.8847	30.2636	197
Chr1A	569820516	569820741	Infected_peak_351	40.3933	+	1	225	0	TraesCS1A03G0987800	6.07645	3.77711e-13	6.92471e-13	12.4228	12.1596	225
Chr1A	571203126	571203176	Infected_peak_352	180.709	+	1	50	0	TraesCS1A03G0990000	3.58048	3.91584e-56	3.99272e-55	55.4072	54.3987	50
Chr1A	574683347	574683397	Infected_peak_353	16.4714	+	1	50	0	TraesCS1A03G1001000	4.78154	9.45518e-06	1.10059e-05	5.02433	4.95838	50
Chr1A	576999351	576999678	Infected_peak_354	167.422	+	2	23177	0,150	TraesCS1A03G1009400	4.00365	4.49378e-52	3.98991e-51	51.3474	50.399	327
Chr1A	578697650	578697825	Infected_peak_355	345.997	+	1	175	0	TraesCS1A03G1017300	4.46365	1.40063e-106	6.98909e-105	105.854	104.156	175
Chr1A	579132095	579132170	Infected_peak_356	33.8613	+	1	75	0	TraesCS1A03G1018800	4.5292	3.89864e-11	6.4083e-11	10.4091	10.1933	75
Chr1A	579132195	579132270	Infected_peak_357	24.1849	+	1	75	0	TraesCS1A03G1018800	4.1871	3.79365e-08	5.2433e-08	7.42094	7.2804	75
Chr1A	580539204	580539329	Infected_peak_358	46.2023	+	1	125	0	TraesCS1A03G1025600	3.85115	6.16346e-15	1.23518e-14	14.2102	13.9083	125
Chr1A	581225738	581225913	Infected_peak_359	45.064	+	1	175	0	TraesCS1A03G1027100	5.13499	1.38107e-14	2.71892e-14	13.8598	13.5656	175
Chr1A	581675985	581676285	Infected_peak_360	55.74	+	1	300	0	TraesCS1A03G1029500	4.64583	7.2392e-18	1.6618e-17	17.1403	16.7794	300
Chr1A	582667719	582667819	Infected_peak_361	39.4641	+	1	100	0	TraesCS1A03G1031600	5.0394	7.29978e-13	1.31867e-12	12.1367	11.8799	100
Chr1A	584809177	584809302	Infected_peak_362	14.3159	+	1	125	0	TraesCS1A03G1035600	4.98298	4.46664e-05	4.90334e-05	4.35002	4.30951	125
Chr1A	584813806	584813981	Infected_peak_363	71.3041	+	1	175	0	TraesCS1A03G1035600	4.23103	1.19359e-22	3.43022e-22	21.9231	21.4647	175
Chr1A	584814056	584814281	Infected_peak_364	41.0343	+	1	225	0	TraesCS1A03G1035600	8.11219	2.39974e-13	4.44054e-13	12.6198	12.3526	225
Chr1A	585945978	585946103	Infected_peak_365	30.5015	+	1	125	0	TraesCS1A03G1039400	3.93808	4.24494e-10	6.5786e-10	9.37213	9.18187	125
Chr1A	587643582	587643782	Infected_peak_366	44.876	+	1	200	0	TraesCS1A03G1046900	6.26555	1.57932e-14	3.09726e-14	13.8015	13.509	200
Chr1A	588236975	588237075	Infected_peak_367	22.4443	+	1	100	0	TraesCS1A03G1050000	5.02175	1.31539e-07	1.75229e-07	6.88094	6.75639	100
Chr1A	593463337	593463512	Infected_peak_368	147.082	+	1	175	0	TraesCS1A03G1068000	3.82131	7.45346e-46	5.29629e-45	45.1276	44.276	175
Chr1A	593463537	593463587	Infected_peak_369	11.8131	+	1	50	0	TraesCS1A03G1068000	5.66671	0.000269115	0.000277904	3.57006	3.55611	50
Chr1A	594001000	594001175	Infected_peak_370	321.944	+	1	175	0	TraesCS1A03G1071000	4.62312	3.03763e-99	1.21669e-97	98.5175	96.9148	175
Chr1A	595113393	595113543	Infected_peak_371	62.4657	+	1	150	0	TraesCS1A03G1077100	3.4539	6.22668e-20	1.57021e-19	19.2057	18.804	150
Chr1A	596476839	596477072	Infected_peak_372	26.8884	+	2	129,21	0,212	TraesCS1A03G1080900	4.60776	5.53719e-09	8.04983e-09	8.25671	8.09421	233
Chr1A	597839567	597839879	Infected_peak_373	108.48	+	1	312	0	TraesCS1A03G1084700	6.43565	4.77099e-34	2.20972e-33	33.3214	32.6557	312
Chr1A	597854110	597854285	Infected_peak_374	25.3147	+	1	175	0	TraesCS1A03G1085100	5.83252	1.69695e-08	2.3962e-08	7.77033	7.62048	175
Chr1A	1161995	1162220	Infected_peak_375	5.95473	-	1	225	0	TraesCS1A03G0004300	0.19377	0.0158054	0.0161231	1.80119	1.79255	225
Chr1A	1207665	1207815	Infected_peak_376	33.931	-	1	150	0	TraesCS1A03G0004900	3.74265	3.71063e-11	6.10599e-11	10.4306	10.2142	150
Chr1A	1230298	1230498	Infected_peak_377	83.907	-	1	200	0	TraesCS1A03G0005200	4.7027	1.62544e-26	5.51401e-26	25.789	25.2585	200
Chr1A	1334710	1334885	Infected_peak_378	33.6761	-	1	175	0	TraesCS1A03G0005600	4.15392	4.44965e-11	7.28584e-11	10.3517	10.1375	175
Chr1A	4248891	4249016	Infected_peak_379	30.7055	-	1	125	0	TraesCS1A03G0016000	4.14524	3.6725e-10	5.71128e-10	9.43504	9.24327	125
Chr1A	8990617	8990692	Infected_peak_380	33.3577	-	1	75	0	TraesCS1A03G0033800	4.16424	5.58503e-11	9.08496e-11	10.253	10.0417	75
Chr1A	9577115	9577215	Infected_peak_381	46.6317	-	1	100	0	TraesCS1A03G0036900	3.65712	4.54554e-15	9.1722e-15	14.3424	14.0375	100
Chr1A	9578252	9578302	Infected_peak_382	13.4109	-	1	50	0	TraesCS1A03G0037000	6.24964	8.59176e-05	9.18127e-05	4.06592	4.0371	50
Chr1A	9578352	9578527	Infected_peak_383	62.3624	-	1	175	0	TraesCS1A03G0037000	4.11442	6.7003e-20	1.68678e-19	19.1739	18.7729	175
Chr1A	10439522	10439697	Infected_peak_384	70.3507	-	1	175	0	TraesCS1A03G0039500	3.9427	2.34103e-22	6.64233e-22	21.6306	21.1777	175
Chr1A	10956404	10956604	Infected_peak_385	213.867	-	1	200	0	TraesCS1A03G0043600	7.6286	2.9909e-66	4.16441e-65	65.5242	64.3804	200
Chr1A	13309902	13310202	Infected_peak_386	137.298	-	1	300	0	TraesCS1A03G0055300LC	4.71576	7.27378e-43	4.66734e-42	42.1382	41.3309	300
Chr1A	13540430	13540580	Infected_peak_387	58.6517	-	1	150	0	TraesCS1A03G0056600	4.21056	9.21953e-19	2.20834e-18	18.0353	17.6559	150
Chr1A	13545402	13545552	Infected_peak_388	16.0519	-	1	150	0	TraesCS1A03G0056600	5.20355	1.27969e-05	1.47192e-05	4.8929	4.83212	150
Chr1A	13598374	13598524	Infected_peak_389	65.0664	-	1	150	0	TraesCS1A03G0057600	4.50738	9.88842e-21	2.58861e-20	20.0049	19.5869	150
Chr1A	13750827	13750902	Infected_peak_390	15.4924	-	1	75	0	TraesCS1A03G0059400	5.84585	1.91295e-05	2.1693e-05	4.7183	4.66368	75
Chr1A	14021718	14021868	Infected_peak_391	24.1289	-	1	150	0	TraesCS1A03G0061000	5.04412	3.94872e-08	5.45089e-08	7.40354	7.26353	150
Chr1A	20175648	20175773	Infected_peak_392	16.4342	-	1	125	0	TraesCS1A03G0081100LC,TraesCS1A03G0081200	4.11605	9.71297e-06	1.12927e-05	5.01265	4.9472	125
Chr1A	21790124	21790224	Infected_peak_393	167.324	-	1	100	0	TraesCS1A03G0083300	3.76909	4.81866e-52	4.26986e-51	51.3171	50.3696	100
Chr1A	21792368	21792491	Infected_peak_394	14.8505	-	1	123	0	TraesCS1A03G0083300	5.58106	3.04018e-05	3.38506e-05	4.5171	4.47043	123
Chr1A	24227712	24227812	Infected_peak_395	11.7639	-	1	100	0	TraesCS1A03G0096400,TraesCS1A03G0096500LC	5.71805	0.000278804	0.000287545	3.5547	3.54129	100
Chr1A	24231599	24231749	Infected_peak_396	78.2276	-	1	150	0	TraesCS1A03G0096700	4.08942	8.99899e-25	2.82582e-24	24.0458	23.5489	150
Chr1A	26026542	26026667	Infected_peak_397	117.755	-	1	125	0	TraesCS1A03G0103400	4.15803	6.88835e-37	3.56677e-36	36.1619	35.4477	125
Chr1A	27000452	27000552	Infected_peak_398	21.4433	-	1	100	0	TraesCS1A03G0105900	4.80199	2.68551e-07	3.50687e-07	6.57097	6.45508	100
Chr1A	29107587	29107837	Infected_peak_399	310.901	-	1	250	0	TraesCS1A03G0108500	5.44135	7.14021e-96	2.56645e-94	95.1463	93.5907	250
Chr1A	32330332	32330382	Infected_peak_400	11.8804	-	1	50	0	TraesCS1A03G0117100	6.83037	0.000256422	0.000265242	3.59104	3.57636	50
Chr1A	35556990	35557090	Infected_peak_401	91.9475	-	1	100	0	TraesCS1A03G0127800	3.84642	5.54543e-29	2.09437e-28	28.2561	27.6789	100
Chr1A	37273269	37273419	Infected_peak_402	66.3098	-	1	150	0	TraesCS1A03G0130600LC	4.14056	4.0926e-21	1.09332e-20	20.388	19.9613	150
Chr1A	38548815	38548865	Infected_peak_403	16.5639	-	1	50	0	TraesCS1A03G0135500	4.51709	8.84992e-06	1.03222e-05	5.05306	4.98623	50
Chr1A	42138581	42138656	Infected_peak_404	4.71759	-	1	75	0	TraesCS1A03G0143700LC	0.155293	0.0376369	0.0380071	1.42439	1.42014	75
Chr1A	54581524	54581699	Infected_peak_405	123.022	-	1	175	0	TraesCS1A03G0170500	4.90467	1.68662e-38	9.26214e-38	37.773	37.0333	175
Chr1A	56010071	56010221	Infected_peak_406	35.8056	-	1	150	0	TraesCS1A03G0172900LC,TraesCS1A03G0173100LC	4.51024	9.79633e-12	1.6651e-11	11.0089	10.7786	150
Chr1A	56411366	56411466	Infected_peak_407	13.5364	-	1	100	0	TraesCS1A03G0174700	5.33099	7.84219e-05	8.41652e-05	4.10556	4.07487	100
Chr1A	56502265	56502390	Infected_peak_408	19.3807	-	1	125	0	TraesCS1A03G0174800	4.05785	1.17326e-06	1.46496e-06	5.93061	5.83418	125
Chr1A	56528582	56528657	Infected_peak_409	18.0926	-	1	75	0	TraesCS1A03G0175300	8.62326	2.95539e-06	3.57764e-06	5.52938	5.4464	75
Chr1A	56528682	56528882	Infected_peak_410	82.1175	-	1	200	0	TraesCS1A03G0175300	4.29986	5.75669e-26	1.90616e-25	25.2398	24.7198	200
Chr1A	59798188	59798338	Infected_peak_411	35.2481	-	1	150	0	TraesCS1A03G0179100	4.25092	1.45652e-11	2.45048e-11	10.8367	10.6107	150
Chr1A	60660109	60660184	Infected_peak_412	22.4737	-	1	75	0	TraesCS1A03G0181600	4.77574	1.28769e-07	1.71692e-07	6.89019	6.76525	75
Chr1A	60689293	60689468	Infected_peak_413	21.2945	-	1	175	0	TraesCS1A03G0182400	5.06916	2.98648e-07	3.88795e-07	6.52484	6.41028	175
Chr1A	61384467	61384517	Infected_peak_414	12.2801	-	1	50	0	TraesCS1A03G0185800	7.07757	0.000192844	0.00020106	3.71479	3.69667	50
Chr1A	61384542	61384642	Infected_peak_415	23.291	-	1	100	0	TraesCS1A03G0185800	4.94656	7.17701e-08	9.74314e-08	7.14406	7.0113	100
Chr1A	62333266	62333491	Infected_peak_416	216.927	-	1	225	0	TraesCS1A03G0188200	4.40263	3.4758e-67	4.99532e-66	66.4589	65.3014	225
Chr1A	63846737	63846987	Infected_peak_417	65.8082	-	1	250	0	TraesCS1A03G0192800	5.15304	5.83589e-21	1.54792e-20	20.2339	19.8103	250
Chr1A	65912136	65912261	Infected_peak_418	34.1654	-	1	125	0	TraesCS1A03G0195200	4.49851	3.14107e-11	5.19028e-11	10.5029	10.2848	125
Chr1A	66175696	66175746	Infected_peak_419	57.5884	-	1	50	0	TraesCS1A03G0195700	3.80929	1.95589e-18	4.61497e-18	17.7087	17.3358	50
Chr1A	68166348	68166473	Infected_peak_420	57.7038	-	1	125	0	TraesCS1A03G0200700	5.04315	1.80244e-18	4.26022e-18	17.7441	17.3706	125
Chr1A	68196469	68196644	Infected_peak_421	52.4308	-	1	175	0	TraesCS1A03G0200900	4.32296	7.54071e-17	1.64719e-16	16.1226	15.7833	175
Chr1A	71576712	71576987	Infected_peak_422	122.019	-	1	275	0	TraesCS1A03G0204800	5.66861	3.41887e-38	1.85581e-37	37.4661	36.7315	275
Chr1A	75149956	75150081	Infected_peak_423	37.374	-	1	125	0	TraesCS1A03G0209800	3.93055	3.21115e-12	5.61457e-12	11.4933	11.2507	125
Chr1A	75154297	75154422	Infected_peak_424	85.1449	-	1	125	0	TraesCS1A03G0209900	3.77259	6.77784e-27	2.33789e-26	26.1689	25.6312	125
Chr1A	78840964	78841164	Infected_peak_425	175.489	-	1	200	0	TraesCS1A03G0214000	4.53679	1.54612e-54	1.48734e-53	53.8108	52.8276	200
Chr1A	81307374	81307524	Infected_peak_426	76.3563	-	1	150	0	TraesCS1A03G0217500	3.66875	3.37406e-24	1.03386e-23	23.4718	22.9855	150
Chr1A	82021109	82021284	Infected_peak_427	128.306	-	1	175	0	TraesCS1A03G0218100	3.9615	4.09533e-40	2.37684e-39	39.3877	38.624	175
Chr1A	82030253	82030378	Infected_peak_428	40.5275	-	1	125	0	TraesCS1A03G0218200	4.874	3.43355e-13	6.30973e-13	12.4643	12.2	125
Chr1A	86122364	86122489	Infected_peak_429	27.4607	-	1	125	0	TraesCS1A03G0221900	5.47915	3.68288e-09	5.414e-09	8.43381	8.26648	125
Chr1A	87327535	87327710	Infected_peak_430	28.5536	-	1	175	0	TraesCS1A03G0224200LC	4.69622	1.69292e-09	2.53818e-09	8.77136	8.59548	175
Chr1A	88922860	88923010	Infected_peak_431	102.594	-	1	150	0	TraesCS1A03G0227100	3.9059	3.05083e-32	1.30664e-31	31.5156	30.8838	150
Chr1A	93024411	93024686	Infected_peak_432	94.2944	-	1	275	0	TraesCS1A03G0230500	4.226	1.06102e-29	4.11686e-29	28.9743	28.3854	275
Chr1A	93323118	93323218	Infected_peak_433	10.8736	-	1	100	0	TraesCS1A03G0230800,TraesCS1A03G0230900	6.5938	0.000520493	0.000532994	3.28359	3.27328	100
Chr1A	93766298	93766598	Infected_peak_434	219.168	-	1	300	0	TraesCS1A03G0232200	5.2489	7.19717e-68	1.05645e-66	67.1428	65.9762	300
Chr1A	95937914	95938089	Infected_peak_435	133.679	-	1	175	0	TraesCS1A03G0233900	3.80308	9.32306e-42	5.73707e-41	41.0304	40.2413	175
Chr1A	98087497	98087647	Infected_peak_436	24.2141	-	1	150	0	TraesCS1A03G0242100	4.71781	3.71585e-08	5.13857e-08	7.42994	7.28916	150
Chr1A	98718144	98718344	Infected_peak_437	42.5075	-	1	200	0	TraesCS1A03G0244400	4.88757	8.44781e-14	1.59949e-13	13.0733	12.796	200
Chr1A	99872033	99872083	Infected_peak_438	19.3948	-	1	50	0	TraesCS1A03G0245600	4.86294	1.16128e-06	1.45071e-06	5.93506	5.83842	50
Chr1A	100467432	100467582	Infected_peak_439	71.6092	-	1	150	0	TraesCS1A03G0247700	4.2639	9.61922e-23	2.7765e-22	22.0169	21.5565	150
Chr1A	103219939	103220114	Infected_peak_440	120.642	-	1	175	0	TraesCS1A03G0255300	4.23874	8.99211e-38	4.82243e-37	37.0461	36.3167	175
Chr1A	103605072	103605172	Infected_peak_441	40.0029	-	1	100	0	TraesCS1A03G0255900	3.86736	4.98532e-13	9.07641e-13	12.3023	12.0421	100
Chr1A	104210862	104211137	Infected_peak_442	159.124	-	1	275	0	TraesCS1A03G0256600	3.82405	1.55373e-49	1.25592e-48	48.8086	47.901	275
Chr1A	105147818	105147993	Infected_peak_443	464.974	-	1	175	0	TraesCS1A03G0257200	7.13219	6.76142e-143	1.0689e-140	142.17	139.971	175
Chr1A	106214243	106214293	Infected_peak_444	20.3843	-	1	50	0	TraesCS1A03G0258400LC	4.35282	5.72477e-07	7.30637e-07	6.24224	6.1363	50
Chr1A	106770684	106770759	Infected_peak_445	25.1329	-	1	75	0	TraesCS1A03G0259500	4.23455	1.93197e-08	2.71796e-08	7.714	7.56576	75
Chr1A	106770809	106771084	Infected_peak_446	175.613	-	1	275	0	TraesCS1A03G0259500	4.91132	1.41669e-54	1.36504e-53	53.8487	52.8649	275
Chr1A	108048253	108048453	Infected_peak_447	359.305	-	1	200	0	TraesCS1A03G0260200	5.90624	1.22289e-110	6.89141e-109	109.913	108.162	200
Chr1A	113355487	113355612	Infected_peak_448	51.7128	-	1	125	0	TraesCS1A03G0268100	3.95042	1.25361e-16	2.70956e-16	15.9018	15.5671	125
Chr1A	115725216	115725391	Infected_peak_449	74.674	-	1	175	0	TraesCS1A03G0271800	3.91807	1.10625e-23	3.318e-23	22.9561	22.4791	175
Chr1A	115728410	115728485	Infected_peak_450	13.0982	-	1	75	0	TraesCS1A03G0271800	5.34067	0.000107536	0.000114041	3.96845	3.94294	75
Chr1A	117549143	117549293	Infected_peak_451	140.358	-	1	150	0	TraesCS1A03G0273500	5.55875	8.46664e-44	5.59764e-43	43.0723	42.252	150
Chr1A	121309350	121309550	Infected_peak_452	261.863	-	1	200	0	TraesCS1A03G0280800	5.11414	6.97944e-81	1.48429e-79	80.1562	78.8285	200
Chr1A	126320767	126320941	Infected_peak_453	95.3784	-	1	174	0	TraesCS1A03G0286700	5.54514	4.92663e-30	1.94195e-29	29.3075	28.7118	174
Chr1A	133021430	133021605	Infected_peak_454	90.3746	-	1	175	0	TraesCS1A03G0293900	3.99696	1.68254e-28	6.23069e-28	27.774	27.2055	175
Chr1A	134896327	134896427	Infected_peak_455	4.68179	-	1	100	0	TraesCS1A03G0295400	0.15512	0.0386369	0.0389618	1.413	1.40936	100
Chr1A	135267292	135267442	Infected_peak_456	17.6896	-	1	150	0	TraesCS1A03G0296700	4.32113	3.95539e-06	4.73048e-06	5.40281	5.3251	150
Chr1A	137600945	137601170	Infected_peak_457	39.208	-	1	225	0	TraesCS1A03G0299700	5.01695	8.74737e-13	1.57476e-12	12.0581	11.8028	225
Chr1A	138058852	138058952	Infected_peak_458	102.592	-	1	100	0	TraesCS1A03G0300000LC,TraesCS1A03G0300200	3.57385	3.05539e-32	1.30828e-31	31.5149	30.8833	100
Chr1A	143550263	143550463	Infected_peak_459	143.271	-	1	200	0	TraesCS1A03G0304700	4.14888	1.09459e-44	7.43489e-44	43.9607	43.1287	200
Chr1A	147465878	147466053	Infected_peak_460	42.0958	-	1	175	0	TraesCS1A03G0307800	5.52024	1.13076e-13	2.12765e-13	12.9466	12.6721	175
Chr1A	149029634	149029759	Infected_peak_461	24.3886	-	1	125	0	TraesCS1A03G0309000	4.41337	3.2824e-08	4.5529e-08	7.48381	7.34171	125
Chr1A	149428135	149428185	Infected_peak_462	15.5493	-	1	50	0	TraesCS1A03G0309200LC	5.44407	1.83593e-05	2.08539e-05	4.73614	4.68081	50
Chr1A	149433272	149433447	Infected_peak_463	242.559	-	1	175	0	TraesCS1A03G0309300	3.94712	5.3189e-75	9.60736e-74	74.2742	73.0174	175
Chr1A	150681504	150681604	Infected_peak_464	54.4867	-	1	100	0	TraesCS1A03G0310800	3.88582	1.7557e-17	3.96158e-17	16.7555	16.4021	100
Chr1A	159855845	159856070	Infected_peak_465	340.059	-	1	225	0	TraesCS1A03G0321300	5.64879	8.97017e-105	4.28458e-103	104.047	102.368	225
Chr1A	172982017	172982417	Infected_peak_466	109.493	-	1	400	0	TraesCS1A03G0330400	5.58264	2.33841e-34	1.09498e-33	33.6311	32.9606	400
Chr1A	173436934	173437259	Infected_peak_467	176.216	-	1	325	0	TraesCS1A03G0330800	4.69204	9.2651e-55	8.99032e-54	54.0331	53.0462	325
Chr1A	177126042	177126267	Infected_peak_468	78.5516	-	1	225	0	TraesCS1A03G0332500	4.45135	7.16137e-25	2.25747e-24	24.145	23.6464	225
Chr1A	187234565	187234890	Infected_peak_469	243.713	-	1	325	0	TraesCS1A03G0339400	4.02684	2.35284e-75	4.3153e-74	74.6284	73.365	325
Chr1A	187239264	187239389	Infected_peak_470	32.5429	-	1	125	0	TraesCS1A03G0339400	4.38831	9.95509e-11	1.59811e-10	10.002	9.79639	125
Chr1A	189078780	189079005	Infected_peak_471	121.94	-	1	225	0	TraesCS1A03G0341000	5.16665	3.61539e-38	1.9601e-37	37.4418	36.7077	225
Chr1A	203987532	203987707	Infected_peak_472	31.4212	-	1	175	0	TraesCS1A03G0347000	5.21376	2.21121e-10	3.47752e-10	9.65537	9.45873	175
Chr1A	203987782	203987957	Infected_peak_473	42.5533	-	1	175	0	TraesCS1A03G0347000	4.05721	8.17945e-14	1.5495e-13	13.0873	12.8098	175
Chr1A	204202262	204203478	Infected_peak_474	236.293	-	2	29396	0,820	TraesCS1A03G0347400	6.3011	4.33628e-73	7.39153e-72	72.3629	71.1313	1216
Chr1A	205927798	205927973	Infected_peak_475	41.2235	-	1	175	0	TraesCS1A03G0348000LC	4.7299	2.09856e-13	3.89493e-13	12.6781	12.4095	175
Chr1A	211441697	211441847	Infected_peak_476	310.839	-	1	150	0	TraesCS1A03G0352600	5.38972	7.4701e-96	2.67964e-94	95.1267	93.5719	150
Chr1A	214864690	214864790	Infected_peak_477	59.3484	-	1	100	0	TraesCS1A03G0353900	4.34565	5.63491e-19	1.36251e-18	18.2491	17.8657	100
Chr1A	218393069	218393294	Infected_peak_478	112.297	-	1	225	0	TraesCS1A03G0357800	4.86561	3.24669e-35	1.56711e-34	34.4886	33.8049	225
Chr1A	219580538	219580588	Infected_peak_479	56.1756	-	1	50	0	TraesCS1A03G0359000	3.79573	5.32179e-18	1.22875e-17	17.2739	16.9105	50
Chr1A	221844603	221844853	Infected_peak_480	46.1153	-	1	250	0	TraesCS1A03G0360600	5.26811	6.5574e-15	1.31192e-14	14.1833	13.8821	250
Chr1A	224289692	224289842	Infected_peak_481	90.5914	-	1	150	0	TraesCS1A03G0362200	4.56035	1.4427e-28	5.36145e-28	27.8408	27.2707	150
Chr1A	224295655	224295780	Infected_peak_482	20.4286	-	1	125	0	TraesCS1A03G0362200,TraesCS1A03G0362300LC,TraesCS1A03G0362400LC	5.97223	5.54575e-07	7.08549e-07	6.25604	6.14963	125
Chr1A	225874059	225874134	Infected_peak_483	50.6026	-	1	75	0	TraesCS1A03G0363800	3.93076	2.7491e-16	5.8492e-16	15.5608	15.2329	75
Chr1A	225874159	225874209	Infected_peak_484	45.7147	-	1	50	0	TraesCS1A03G0363800	3.6745	8.71327e-15	1.7318e-14	14.0598	13.7615	50
Chr1A	227431395	227431470	Infected_peak_485	36.7044	-	1	75	0	TraesCS1A03G0365600	4.27023	5.16826e-12	8.93073e-12	11.2867	11.0491	75
Chr1A	233980724	233980999	Infected_peak_486	122.268	-	1	275	0	TraesCS1A03G0369700	5.63861	2.8669e-38	1.56236e-37	37.5426	36.8062	275
Chr1A	236670742	236671067	Infected_peak_487	146.277	-	1	325	0	TraesCS1A03G0371500	4.69083	1.31601e-45	9.25195e-45	44.8807	44.0338	325
Chr1A	240525706	240525831	Infected_peak_488	20.8189	-	1	125	0	TraesCS1A03G0377200	4.54931	4.19788e-07	5.40631e-07	6.37697	6.2671	125
Chr1A	245438824	245439024	Infected_peak_489	78.3878	-	1	200	0	TraesCS1A03G0382100	4.54444	8.03518e-25	2.5289e-24	24.095	23.5971	200
Chr1A	250405883	250406058	Infected_peak_490	128.685	-	1	175	0	TraesCS1A03G0386900,TraesCS1A03G0387000	4.91669	3.13506e-40	1.82783e-39	39.5038	38.7381	175
Chr1A	253454048	253454223	Infected_peak_491	51.5586	-	1	175	0	TraesCS1A03G0392000	5.23176	1.39769e-16	3.01513e-16	15.8546	15.5207	175
Chr1A	254177416	254177491	Infected_peak_492	23.7446	-	1	75	0	TraesCS1A03G0393100	4.05851	5.19224e-08	7.11469e-08	7.28464	7.14784	75
Chr1A	254393058	254393333	Infected_peak_493	136.353	-	1	275	0	TraesCS1A03G0393700	5.4141	1.41972e-42	8.98718e-42	41.8478	41.0464	275
Chr1A	254393383	254394347	Infected_peak_494	51.8785	-	3	79,67,29	0,795,935	TraesCS1A03G0393700	3.78966	1.11487e-16	2.41554e-16	15.9528	15.617	964
Chr1A	254714059	254714209	Infected_peak_495	47.8427	-	1	150	0	TraesCS1A03G0394600	4.2523	1.93016e-15	3.96189e-15	14.7144	14.4021	150
Chr1A	255267764	255268014	Infected_peak_496	152.875	-	1	250	0	TraesCS1A03G0395900	4.74154	1.25883e-47	9.54896e-47	46.9	46.02	250
Chr1A	259465725	259465850	Infected_peak_497	32.8939	-	1	125	0	TraesCS1A03G0403400	3.97886	7.75737e-11	1.25296e-10	10.1103	9.90206	125
Chr1A	263699822	263699897	Infected_peak_498	48.3774	-	1	75	0	TraesCS1A03G0408100	4.26228	1.32351e-15	2.73491e-15	14.8783	14.5631	75
Chr1A	267517004	267517079	Infected_peak_499	16.6588	-	1	75	0	TraesCS1A03G0411300	4.84602	8.26764e-06	9.66514e-06	5.08262	5.01479	75
Chr1A	267517129	267517179	Infected_peak_500	14.4229	-	1	50	0	TraesCS1A03G0411300	5.41651	4.13747e-05	4.55262e-05	4.38326	4.34174	50
Chr1A	269033881	269034056	Infected_peak_501	150.639	-	1	175	0	TraesCS1A03G0412400	4.41519	6.0736e-47	4.49829e-46	46.2166	45.347	175
Chr1A	283434215	283434390	Infected_peak_502	67.7406	-	1	175	0	TraesCS1A03G0427700LC,TraesCS1A03G0427800	3.54007	1.48968e-21	4.05541e-21	20.8269	20.392	175
Chr1A	283664458	283664583	Infected_peak_503	86.0846	-	1	125	0	TraesCS1A03G0427900	3.58563	3.49604e-27	1.21884e-26	26.4564	25.9141	125
Chr1A	286104412	286104487	Infected_peak_504	18.6301	-	1	75	0	TraesCS1A03G0429000	4.21362	2.00943e-06	2.46474e-06	5.69693	5.60823	75
Chr1A	286688161	286688336	Infected_peak_505	179.155	-	1	175	0	TraesCS1A03G0429500	3.92741	1.16851e-55	1.17205e-54	54.9324	53.9311	175
Chr1A	290304775	290304950	Infected_peak_506	23.8525	-	1	175	0	TraesCS1A03G0433600	4.06671	4.8097e-08	6.60216e-08	7.31788	7.18031	175
Chr1A	293344304	293344579	Infected_peak_507	55.2753	-	1	275	0	TraesCS1A03G0438500	5.42884	1.00508e-17	2.29336e-17	16.9978	16.6395	275
Chr1A	293348956	293349106	Infected_peak_508	15.2909	-	1	150	0	TraesCS1A03G0438500	8.21508	2.2123e-05	2.49451e-05	4.65516	4.60302	150
Chr1A	293856134	293856309	Infected_peak_509	123.985	-	1	175	0	TraesCS1A03G0439700	5.4417	8.55955e-39	4.75164e-38	38.0675	37.3232	175
Chr1A	294652037	294652162	Infected_peak_510	41.1346	-	1	125	0	TraesCS1A03G0441900	4.10001	2.23494e-13	4.14246e-13	12.6507	12.3827	125
Chr1A	296625040	296625115	Infected_peak_511	13.3615	-	1	75	0	TraesCS1A03G0444200LC	4.88501	8.90464e-05	9.5014e-05	4.05038	4.02221	75
Chr1A	296987431	296987606	Infected_peak_512	42.6743	-	1	175	0	TraesCS1A03G0444900	5.9875	7.50686e-14	1.4248e-13	13.1245	12.8462	175
Chr1A	300378674	300378724	Infected_peak_513	4.6252	-	1	50	0	TraesCS1A03G0450700	0.154887	0.0403256	0.0405206	1.39442	1.39232	50
Chr1A	302130362	302130412	Infected_peak_514	4.70534	-	1	50	0	TraesCS1A03G0453100	0.155255	0.0379748	0.038331	1.4205	1.41645	50
Chr1A	302925884	302925984	Infected_peak_515	13.9826	-	1	100	0	TraesCS1A03G0455000	6.56966	5.6755e-05	6.17762e-05	4.246	4.20918	100
Chr1A	303503465	303503690	Infected_peak_516	56.3871	-	1	225	0	TraesCS1A03G0455800	4.24236	4.57936e-18	1.06117e-17	17.3392	16.9742	225
Chr1A	303579654	303579824	Infected_peak_517	29.0784	-	2	27,73	0,97	TraesCS1A03G0455900	4.50726	1.16546e-09	1.7641e-09	8.9335	8.75348	170
Chr1A	305566593	305566768	Infected_peak_518	35.0235	-	1	175	0	TraesCS1A03G0459800	5.42493	1.70757e-11	2.86342e-11	10.7676	10.5431	175
Chr1A	305749520	305749820	Infected_peak_519	197.437	-	1	300	0	TraesCS1A03G0460000	5.28777	3.06376e-61	3.67816e-60	60.5137	59.4344	300
Chr1A	308257553	308257703	Infected_peak_520	85.4306	-	1	150	0	TraesCS1A03G0462200	4.7797	5.54403e-27	1.91786e-26	26.2562	25.7172	150
Chr1A	310267038	310267213	Infected_peak_521	12.5347	-	1	175	0	TraesCS1A03G0465100	3.53775	0.000160955	0.000168531	3.7933	3.77332	175
Chr1A	310643799	310644024	Infected_peak_522	304.73	-	1	225	0	TraesCS1A03G0466200	5.37573	5.55221e-94	1.85046e-92	93.2555	91.7327	225
Chr1A	315404567	315404642	Infected_peak_523	16.3283	-	1	75	0	TraesCS1A03G0473800	4.75811	1.04828e-05	1.21529e-05	4.97952	4.91532	75
Chr1A	315567797	315567972	Infected_peak_524	64.683	-	1	175	0	TraesCS1A03G0474000	4.67436	1.29688e-20	3.37649e-20	19.8871	19.4715	175
Chr1A	320717674	320717799	Infected_peak_525	31.43	-	1	125	0	TraesCS1A03G0477800	4.47846	2.19712e-10	3.45631e-10	9.65815	9.46139	125
Chr1A	323496711	323496886	Infected_peak_526	89.7051	-	1	175	0	TraesCS1A03G0482200	4.96514	2.70439e-28	9.91001e-28	27.5679	27.0039	175
Chr1A	323503527	323503777	Infected_peak_527	113.906	-	1	250	0	TraesCS1A03G0482300	4.97551	1.04104e-35	5.13732e-35	34.9825	34.2893	250
Chr1A	326643458	326643608	Infected_peak_528	80.3606	-	1	150	0	TraesCS1A03G0486400	4.44286	1.98998e-25	6.44236e-25	24.7012	24.191	150
Chr1A	329114106	329114381	Infected_peak_529	257.68	-	1	275	0	TraesCS1A03G0488800,TraesCS1A03G0488900	4.23243	1.31369e-79	2.69435e-78	78.8815	77.5695	275
Chr1A	329837624	329837724	Infected_peak_530	22.4303	-	1	100	0	TraesCS1A03G0490000	4.17337	1.32861e-07	1.76937e-07	6.8766	6.75218	100
Chr1A	332339020	332339170	Infected_peak_531	45.6498	-	1	150	0	TraesCS1A03G0491900	4.29205	9.12331e-15	1.81148e-14	14.0398	13.742	150
Chr1A	332888398	332888448	Infected_peak_532	18.3989	-	1	50	0	TraesCS1A03G0492600	5.66307	2.37354e-06	2.89327e-06	5.6246	5.53861	50
Chr1A	334697750	334697875	Infected_peak_533	14.2791	-	1	125	0	TraesCS1A03G0493700	4.62546	4.58631e-05	5.02977e-05	4.33854	4.29845	125
Chr1A	335093044	335093119	Infected_peak_534	25.285	-	1	75	0	TraesCS1A03G0494300LC	4.22674	1.73343e-08	2.44595e-08	7.76109	7.61155	75
Chr1A	335094439	335095022	Infected_peak_535	32.4618	-	2	12,38	0,545	TraesCS1A03G0494400	3.804	1.05471e-10	1.69057e-10	9.97687	9.77197	583
Chr1A	335171163	335171363	Infected_peak_536	310.188	-	1	200	0	TraesCS1A03G0494500	4.8439	1.1801e-95	4.20785e-94	94.9281	93.3759	200
Chr1A	335753520	335753670	Infected_peak_537	98.4869	-	1	150	0	TraesCS1A03G0497100	4.23728	5.52417e-31	2.25151e-30	30.2577	29.6475	150
Chr1A	336001433	336001683	Infected_peak_538	149.894	-	1	250	0	TraesCS1A03G0497600	4.26433	1.02705e-46	7.541e-46	45.9884	45.1226	250
Chr1A	336562174	336562374	Infected_peak_539	103.109	-	1	200	0	TraesCS1A03G0497900	4.65731	2.12095e-32	9.14523e-32	31.6735	31.0388	200
Chr1A	337379271	337379571	Infected_peak_540	286.917	-	1	300	0	TraesCS1A03G0499300,TraesCS1A03G0499400	5.37309	1.54744e-88	4.2594e-87	87.8104	86.3707	300
Chr1A	339247420	339247545	Infected_peak_541	21.0901	-	1	125	0	TraesCS1A03G0502600	5.77773	3.45816e-07	4.47981e-07	6.46116	6.34874	125
Chr1A	339320208	339320308	Infected_peak_542	27.9162	-	1	100	0	TraesCS1A03G0502800	5.35891	2.66469e-09	3.94808e-09	8.57435	8.40361	100
Chr1A	340129797	340130047	Infected_peak_543	40.8239	-	1	250	0	TraesCS1A03G0503700,TraesCS1A03G0503800	6.20892	2.78627e-13	5.13768e-13	12.555	12.2892	250
Chr1A	341544873	341545023	Infected_peak_544	101.539	-	1	150	0	TraesCS1A03G0505200	3.9205	6.40231e-32	2.71471e-31	31.1937	30.5663	150
Chr1A	343435129	343435204	Infected_peak_545	40.7831	-	1	75	0	TraesCS1A03G0506700	4.11829	2.86835e-13	5.28522e-13	12.5424	12.2769	75
Chr1A	344946946	344947171	Infected_peak_546	81.4757	-	1	225	0	TraesCS1A03G0508700	5.4895	9.0535e-26	2.9741e-25	25.0432	24.5266	225
Chr1A	346656491	346656766	Infected_peak_547	302.545	-	1	275	0	TraesCS1A03G0511700	4.46866	2.5795e-93	8.40881e-92	92.5885	91.0753	275
Chr1A	349185163	349185463	Infected_peak_548	113.701	-	1	300	0	TraesCS1A03G0515500	5.09648	1.20489e-35	5.92461e-35	34.9191	34.2273	300
Chr1A	350260743	350260943	Infected_peak_549	107.152	-	1	200	0	TraesCS1A03G0517100	4.38906	1.21382e-33	5.54855e-33	32.9158	32.2558	200
Chr1A	351934568	351934743	Infected_peak_550	18.9466	-	1	175	0	TraesCS1A03G0518600	4.67677	1.60228e-06	1.97933e-06	5.79526	5.70348	175
Chr1A	353138101	353138251	Infected_peak_551	95.0176	-	1	150	0	TraesCS1A03G0521700	4.84763	6.35437e-30	2.49373e-29	29.1969	28.6032	150
Chr1A	353665149	353665199	Infected_peak_552	45.3591	-	1	50	0	TraesCS1A03G0524200	4.27774	1.12101e-14	2.21598e-14	13.9504	13.6544	50
Chr1A	353700799	353700899	Infected_peak_553	45.0535	-	1	100	0	TraesCS1A03G0524400	4.25852	1.39193e-14	2.73879e-14	13.8564	13.5624	100
Chr1A	354779378	354779528	Infected_peak_554	27.2859	-	1	150	0	TraesCS1A03G0525200	4.00347	4.17088e-09	6.11126e-09	8.37977	8.21387	150
Chr1A	355822837	355823062	Infected_peak_555	78.7156	-	1	225	0	TraesCS1A03G0527300	3.93975	6.37718e-25	2.01489e-24	24.1954	23.6957	225
Chr1A	356850127	356850377	Infected_peak_556	369.99	-	1	250	0	TraesCS1A03G0529100	5.73584	6.82048e-114	4.18698e-112	113.166	111.378	250
Chr1A	356859467	356859517	Infected_peak_557	29.9881	-	1	50	0	TraesCS1A03G0529300	4.25361	6.1163e-10	9.39034e-10	9.21351	9.02732	50
Chr1A	357243346	357243596	Infected_peak_558	105.602	-	1	250	0	TraesCS1A03G0530200	4.52846	3.63404e-33	1.62377e-32	32.4396	31.7895	250
Chr1A	358569073	358569123	Infected_peak_559	17.767	-	1	50	0	TraesCS1A03G0531200,TraesCS1A03G0531300	8.6277	3.74047e-06	4.48334e-06	5.42707	5.3484	50
Chr1A	358569223	358569448	Infected_peak_560	53.7651	-	1	225	0	TraesCS1A03G0531200	5.16138	2.92849e-17	6.53278e-17	16.5334	16.1849	225
Chr1A	359674520	359674645	Infected_peak_561	72.4085	-	1	125	0	TraesCS1A03G0533000	3.83848	5.47208e-23	1.59545e-22	22.2618	21.7971	125
Chr1A	364505437	364505512	Infected_peak_562	13.0911	-	1	75	0	TraesCS1A03G0539600	4.93275	0.00010809	0.000114602	3.96621	3.94081	75
Chr1A	365676315	365676390	Infected_peak_563	70.1178	-	1	75	0	TraesCS1A03G0541300	3.6955	2.76251e-22	7.80601e-22	21.5587	21.1076	75
Chr1A	370254488	370254663	Infected_peak_564	18.1806	-	1	175	0	TraesCS1A03G0547900	4.3489	2.77488e-06	3.36595e-06	5.55676	5.47289	175
Chr1A	370922384	370922459	Infected_peak_565	27.018	-	1	75	0	TraesCS1A03G0550100	5.0837	5.04988e-09	7.35815e-09	8.29672	8.13323	75
Chr1A	373953994	373954144	Infected_peak_566	28.6906	-	1	150	0	TraesCS1A03G0554900	4.98398	1.53516e-09	2.30823e-09	8.81385	8.63672	150
Chr1A	374026982	374027432	Infected_peak_567	108.434	-	1	450	0	TraesCS1A03G0555200	6.01309	4.92859e-34	2.28094e-33	33.3073	32.6419	450
Chr1A	376857517	376857642	Infected_peak_568	14.3768	-	1	125	0	TraesCS1A03G0559700	5.0716	4.27613e-05	4.70055e-05	4.36895	4.32785	125
Chr1A	377519755	377520055	Infected_peak_569	266.015	-	1	300	0	TraesCS1A03G0560100	5.72296	3.74123e-82	8.34375e-81	81.427	80.0786	300
Chr1A	377886310	377886360	Infected_peak_570	28.7698	-	1	50	0	TraesCS1A03G0560800	4.19928	1.45175e-09	2.18484e-09	8.83811	8.66058	50
Chr1A	377893444	377893594	Infected_peak_571	49.9927	-	1	150	0	TraesCS1A03G0560900	4.71212	4.22865e-16	8.92703e-16	15.3738	15.0493	150
Chr1A	378058675	378058750	Infected_peak_572	22.8017	-	1	75	0	TraesCS1A03G0561300	5.61762	1.01825e-07	1.36777e-07	6.99215	6.86399	75
Chr1A	378810834	378810934	Infected_peak_573	16.8494	-	1	100	0	TraesCS1A03G0563000LC	4.75574	7.21086e-06	8.46908e-06	5.14201	5.07216	100
Chr1A	382596216	382596266	Infected_peak_574	10.664	-	1	50	0	TraesCS1A03G0568300	0.888114	0.000602263	0.00061634	3.22021	3.21018	50
Chr1A	382771305	382771455	Infected_peak_575	37.6707	-	1	150	0	TraesCS1A03G0568600	4.28692	2.60206e-12	4.57063e-12	11.5847	11.34	150
Chr1A	385960631	385960806	Infected_peak_576	29.1684	-	1	175	0	TraesCS1A03G0571900	4.05326	1.09339e-09	1.65739e-09	8.96123	8.78058	175
Chr1A	386976153	386976253	Infected_peak_577	38.549	-	1	100	0	TraesCS1A03G0572600	3.80058	1.39732e-12	2.48647e-12	11.8547	11.6044	100
Chr1A	388044188	388044538	Infected_peak_578	147.889	-	1	350	0	TraesCS1A03G0573800	4.5623	4.21405e-46	3.02571e-45	45.3753	44.5192	350
Chr1A	393540110	393540235	Infected_peak_579	26.9921	-	1	125	0	TraesCS1A03G0581700	4.27771	5.14267e-09	7.49153e-09	8.28881	8.12543	125
Chr1A	394215932	394216082	Infected_peak_580	4.70482	-	1	150	0	TraesCS1A03G0583200,TraesCS1A03G0583300	0.155263	0.0379951	0.038345	1.42027	1.41629	150
Chr1A	395146341	395146641	Infected_peak_581	140.209	-	1	300	0	TraesCS1A03G0584500	5.15663	9.42542e-44	6.20626e-43	43.0257	42.2072	300
Chr1A	395929657	395929757	Infected_peak_582	66.7508	-	1	100	0	TraesCS1A03G0585600	4.96239	2.99864e-21	8.05408e-21	20.5231	20.094	100
Chr1A	396001707	396001757	Infected_peak_583	30.9985	-	1	50	0	TraesCS1A03G0585900	4.68135	2.98047e-10	4.66146e-10	9.52572	9.33148	50
Chr1A	396265041	396265241	Infected_peak_584	137.777	-	1	200	0	TraesCS1A03G0587300	4.96014	5.18821e-43	3.34955e-42	42.285	41.475	200
Chr1A	398119470	398119595	Infected_peak_585	67.8569	-	1	125	0	TraesCS1A03G0589700	4.5105	1.37075e-21	3.74133e-21	20.863	20.427	125
Chr1A	398154368	398154493	Infected_peak_586	28.0428	-	1	125	0	TraesCS1A03G0590000	4.02241	2.43468e-09	3.61634e-09	8.61356	8.44173	125
Chr1A	399419913	399420088	Infected_peak_587	171.333	-	1	175	0	TraesCS1A03G0591500	5.06301	2.88651e-53	2.6525e-52	52.5396	51.5763	175
Chr1A	399799906	399799981	Infected_peak_588	14.2633	-	1	75	0	TraesCS1A03G0592100LC	7.6872	4.63754e-05	5.08533e-05	4.33371	4.29368	75
Chr1A	400900215	400900590	Infected_peak_589	206.067	-	1	375	0	TraesCS1A03G0593200LC,TraesCS1A03G0593300	6.71631	7.21246e-64	9.28267e-63	63.1419	62.0323	375
Chr1A	405280926	405281001	Infected_peak_590	28.4043	-	1	75	0	TraesCS1A03G0599900	4.04457	1.88168e-09	2.8148e-09	8.72545	8.55055	75
Chr1A	405301297	405301447	Infected_peak_591	38.8563	-	1	150	0	TraesCS1A03G0600400	4.11258	1.12283e-12	2.00945e-12	11.9497	11.6969	150
Chr1A	408749601	408749851	Infected_peak_592	199.398	-	1	250	0	TraesCS1A03G0605200	5.78138	7.76058e-62	9.4438e-61	61.1101	60.0249	250
Chr1A	408950322	408950522	Infected_peak_593	69.3987	-	1	200	0	TraesCS1A03G0605500	6.0935	4.59424e-22	1.28498e-21	21.3378	20.8911	200
Chr1A	408965937	408966087	Infected_peak_594	28.2573	-	1	150	0	TraesCS1A03G0605700	4.47964	2.08872e-09	3.11669e-09	8.68012	8.50631	150
Chr1A	418141520	418141695	Infected_peak_595	208.5	-	1	175	0	TraesCS1A03G0612600LC	4.00641	1.30697e-64	1.71927e-63	63.8837	62.7647	175
Chr1A	419845196	419845346	Infected_peak_596	83.1321	-	1	150	0	TraesCS1A03G0613700	3.67155	2.80973e-26	9.43479e-26	25.5513	25.0253	150
Chr1A	427534097	427534197	Infected_peak_597	27.8422	-	1	100	0	TraesCS1A03G0621900	4.56434	2.80882e-09	4.15576e-09	8.55148	8.38135	100
Chr1A	428737665	428737890	Infected_peak_598	214.323	-	1	225	0	TraesCS1A03G0623300,TraesCS1A03G0623400	5.20071	2.1599e-66	3.03575e-65	65.6656	64.5177	225
Chr1A	429666498	429666773	Infected_peak_599	74.0297	-	1	275	0	TraesCS1A03G0624800	5.36753	1.74538e-23	5.18621e-23	22.7581	22.2851	275
Chr1A	432856918	432857043	Infected_peak_600	37.3493	-	1	125	0	TraesCS1A03G0628900	4.21746	3.26882e-12	5.71149e-12	11.4856	11.2433	125
Chr1A	438273661	438273761	Infected_peak_601	64.8493	-	1	100	0	TraesCS1A03G0637200,TraesCS1A03G0637300	3.96758	1.15296e-20	3.00898e-20	19.9382	19.5216	100
Chr1A	438286859	438287009	Infected_peak_602	110.655	-	1	150	0	TraesCS1A03G0637500	3.67798	1.03285e-34	4.89284e-34	33.986	33.3104	150
Chr1A	441558575	441558650	Infected_peak_603	12.155	-	1	75	0	TraesCS1A03G0641500	6.94439	0.000210775	0.000219269	3.67618	3.65902	75
Chr1A	442244723	442244773	Infected_peak_604	23.1035	-	1	50	0	TraesCS1A03G0642800	5.18541	8.20809e-08	1.10957e-07	7.08576	6.95485	50
Chr1A	442262737	442262862	Infected_peak_605	42.8519	-	1	125	0	TraesCS1A03G0642900LC	3.78869	6.61426e-14	1.25981e-13	13.1795	12.8997	125
Chr1A	442269048	442269398	Infected_peak_606	267.371	-	1	350	0	TraesCS1A03G0643000	5.8847	1.43621e-82	3.26003e-81	81.8428	80.4868	350
Chr1A	442609613	442609913	Infected_peak_607	95.3485	-	1	300	0	TraesCS1A03G0643900	6.84822	5.03104e-30	1.98267e-29	29.2983	28.7027	300
Chr1A	443784823	443784923	Infected_peak_608	67.7121	-	1	100	0	TraesCS1A03G0646700	3.53357	1.51986e-21	4.13631e-21	20.8182	20.3834	100
Chr1A	444434733	444434883	Infected_peak_609	76.5497	-	1	150	0	TraesCS1A03G0648400	4.58281	2.94321e-24	9.04171e-24	23.5312	23.0437	150
Chr1A	445011877	445012002	Infected_peak_610	99.007	-	1	125	0	TraesCS1A03G0649000	3.64181	3.83201e-31	1.57007e-30	30.4166	29.8041	125
Chr1A	445017270	445017495	Infected_peak_611	125.362	-	1	225	0	TraesCS1A03G0649100	5.57961	3.24003e-39	1.82875e-38	38.4895	37.7378	225
Chr1A	445956875	445957100	Infected_peak_612	323.685	-	1	225	0	TraesCS1A03G0650800	5.66861	8.90661e-100	3.64091e-98	99.0503	97.4388	225
Chr1A	447065309	447065534	Infected_peak_613	275.812	-	1	225	0	TraesCS1A03G0652400	4.85159	3.79774e-85	9.38352e-84	84.4205	83.0276	225
Chr1A	448345667	448346042	Infected_peak_614	191.929	-	1	375	0	TraesCS1A03G0655700	4.41872	1.47969e-59	1.67299e-58	58.8298	57.7765	375
Chr1A	449436008	449436058	Infected_peak_615	74.9731	-	1	50	0	TraesCS1A03G0656400	3.86122	8.961e-24	2.69675e-23	23.0476	22.5692	50
Chr1A	449439534	449439684	Infected_peak_616	14.7581	-	1	150	0	TraesCS1A03G0656400	5.41127	3.25015e-05	3.60894e-05	4.4881	4.44262	150
Chr1A	450985019	450985094	Infected_peak_617	19.9943	-	1	75	0	TraesCS1A03G0659000	4.95383	7.56229e-07	9.57425e-07	6.12135	6.0189	75
Chr1A	459698813	459698988	Infected_peak_618	76.1223	-	1	175	0	TraesCS1A03G0670100	4.39845	3.98384e-24	1.21591e-23	23.3997	22.9151	175
Chr1A	461005934	461005984	Infected_peak_619	21.8991	-	1	50	0	TraesCS1A03G0672500	4.31903	1.94106e-07	2.55698e-07	6.71196	6.59227	50
Chr1A	462058488	462058713	Infected_peak_620	92.8672	-	1	225	0	TraesCS1A03G0674000	4.61274	2.89914e-29	1.1071e-28	28.5377	27.9558	225
Chr1A	465058699	465058874	Infected_peak_621	51.0679	-	1	175	0	TraesCS1A03G0681800	4.76771	1.97863e-16	4.23664e-16	15.7036	15.373	175
Chr1A	465627861	465627911	Infected_peak_622	25.7559	-	1	50	0	TraesCS1A03G0683300LC,TraesCS1A03G0683400	4.02901	1.23904e-08	1.76481e-08	7.90691	7.7533	50
Chr1A	467208410	467208460	Infected_peak_623	4.63394	-	1	50	0	TraesCS1A03G0688300LC	0.154925	0.040046	0.0402759	1.39744	1.39495	50
Chr1A	470271489	470271539	Infected_peak_624	19.7314	-	1	50	0	TraesCS1A03G0693200	4.63217	9.13089e-07	1.14885e-06	6.03949	5.93974	50
Chr1A	471035778	471035828	Infected_peak_625	16.4729	-	1	50	0	TraesCS1A03G0694200	4.53074	9.44364e-06	1.09939e-05	5.02486	4.95885	50
Chr1A	472964830	472965055	Infected_peak_626	70.4392	-	1	225	0	TraesCS1A03G0696400	4.23927	2.19792e-22	6.24721e-22	21.658	21.2043	225
Chr1A	473133657	473133832	Infected_peak_627	47.9251	-	1	175	0	TraesCS1A03G0698000	4.25959	1.82035e-15	3.74209e-15	14.7398	14.4269	175
Chr1A	475264707	475264932	Infected_peak_628	81.4186	-	1	225	0	TraesCS1A03G0701700	6.28003	9.42266e-26	3.09424e-25	25.0258	24.5094	225
Chr1A	475822183	475822333	Infected_peak_629	39.1673	-	1	150	0	TraesCS1A03G0702200	5.38311	9.00512e-13	1.61985e-12	12.0455	11.7905	150
Chr1A	480239869	480240044	Infected_peak_630	37.9921	-	1	175	0	TraesCS1A03G0709000	5.5554	2.07246e-12	3.65797e-12	11.6835	11.4368	175
Chr1A	482433374	482433524	Infected_peak_631	75.0944	-	1	150	0	TraesCS1A03G0714500,TraesCS1A03G0714700LC	4.37277	8.22902e-24	2.47939e-23	23.0847	22.6057	150
Chr1A	482435825	482435979	Infected_peak_632	17.8969	-	2	47,28	0,126	TraesCS1A03G0714700LC	6.25434	3.40771e-06	4.09742e-06	5.46754	5.38749	154
Chr1A	483290431	483290581	Infected_peak_633	70.1706	-	1	150	0	TraesCS1A03G0717000	5.47137	2.66163e-22	7.52571e-22	21.5749	21.1235	150
Chr1A	484356155	484356430	Infected_peak_634	94.9539	-	1	275	0	TraesCS1A03G0719000	4.10923	6.64847e-30	2.60628e-29	29.1773	28.584	275
Chr1A	484550960	484551085	Infected_peak_635	66.8284	-	1	125	0	TraesCS1A03G0720100	4.38101	2.83853e-21	7.63208e-21	20.5469	20.1174	125
Chr1A	484610532	484610707	Infected_peak_636	149.714	-	1	175	0	TraesCS1A03G0720300	3.49403	1.16744e-46	8.54368e-46	45.9328	45.0684	175
Chr1A	484617041	484617216	Infected_peak_637	57.3267	-	1	175	0	TraesCS1A03G0720400	4.73407	2.35439e-18	5.5326e-18	17.6281	17.2571	175
Chr1A	485275365	485275465	Infected_peak_638	100.647	-	1	100	0	TraesCS1A03G0721500	3.66833	1.20396e-31	5.03689e-31	30.9194	30.2978	100
Chr1A	486584091	486584216	Infected_peak_639	88.9365	-	1	125	0	TraesCS1A03G0723100	3.8686	4.65063e-28	1.68825e-27	27.3325	26.7726	125
Chr1A	487137220	487137270	Infected_peak_640	19.3783	-	1	50	0	TraesCS1A03G0725200	5.51662	1.17542e-06	1.46745e-06	5.92981	5.83344	50
Chr1A	488240092	488240162	Infected_peak_641	16.442	-	1	70	0	TraesCS1A03G0726600	5.30244	9.65668e-06	1.12324e-05	5.01517	4.94953	70
Chr1A	488320439	488320534	Infected_peak_642	52.6329	-	1	95	0	TraesCS1A03G0727200	4.56033	6.53858e-17	1.43196e-16	16.1845	15.8441	95
Chr1A	489300769	489300869	Infected_peak_643	23.8317	-	1	100	0	TraesCS1A03G0731000	4.38717	4.88052e-08	6.69783e-08	7.31153	7.17407	100
Chr1A	492682837	492682987	Infected_peak_644	81.3121	-	1	150	0	TraesCS1A03G0738800	5.15806	1.01578e-25	3.33137e-25	24.9932	24.4774	150
Chr1A	493740262	493740412	Infected_peak_645	25.9516	-	1	150	0	TraesCS1A03G0741100	6.03849	1.0783e-08	1.5409e-08	7.96726	7.81222	150
Chr1A	497954829	497954954	Infected_peak_646	42.831	-	1	125	0	TraesCS1A03G0753400	4.31504	6.7127e-14	1.27815e-13	13.1731	12.8934	125
Chr1A	499019646	499019971	Infected_peak_647	629.273	-	1	325	0	TraesCS1A03G0756500	6.03265	5.61295e-193	3.71369e-190	192.251	189.43	325
Chr1A	499369481	499369631	Infected_peak_648	24.7227	-	1	150	0	TraesCS1A03G0758200	5.21265	2.58758e-08	3.61185e-08	7.58711	7.44227	150
Chr1A	501126865	501126990	Infected_peak_649	38.5766	-	1	125	0	TraesCS1A03G0765200	4.08448	1.36991e-12	2.4394e-12	11.8633	11.6127	125
Chr1A	501472380	501472480	Infected_peak_650	89.6479	-	1	100	0	TraesCS1A03G0766800	3.9122	2.81668e-28	1.03109e-27	27.5503	26.9867	100
Chr1A	503189829	503189896	Infected_peak_651	37.8508	-	1	67	0	TraesCS1A03G0771300LC	4.16179	2.29052e-12	4.03449e-12	11.6401	11.3942	67
Chr1A	504860043	504860218	Infected_peak_652	84.3916	-	1	175	0	TraesCS1A03G0774200	5.18099	1.15464e-26	3.94086e-26	25.9376	25.4044	175
Chr1A	507434481	507434531	Infected_peak_653	14.7608	-	1	50	0	TraesCS1A03G0780800	4.79891	3.2439e-05	3.60222e-05	4.48893	4.44343	50
Chr1A	507434556	507434606	Infected_peak_654	13.6941	-	1	50	0	TraesCS1A03G0780800	7.52305	7.00109e-05	7.5451e-05	4.15483	4.12234	50
Chr1A	510024572	510024822	Infected_peak_655	178.859	-	1	250	0	TraesCS1A03G0786600,TraesCS1A03G0786700LC	6.28125	1.43918e-55	1.4387e-54	54.8419	53.842	250
Chr1A	512573827	512573877	Infected_peak_656	14.9209	-	1	50	0	TraesCS1A03G0793500	5.71183	2.89098e-05	3.22375e-05	4.53895	4.49164	50
Chr1A	514328040	514328315	Infected_peak_657	103.387	-	1	275	0	TraesCS1A03G0797000	5.55209	1.74115e-32	7.53852e-32	31.7592	31.1227	275
Chr1A	514336546	514336721	Infected_peak_658	105.933	-	1	175	0	TraesCS1A03G0797200	4.76201	2.87687e-33	1.29159e-32	32.5411	31.8889	175
Chr1A	515221899	515222199	Infected_peak_659	137.422	-	1	300	0	TraesCS1A03G0801100	5.17708	6.66352e-43	4.28345e-42	42.1763	41.3682	300
Chr1A	515243170	515243295	Infected_peak_660	19.789	-	1	125	0	TraesCS1A03G0801400	9.01812	8.7621e-07	1.10385e-06	6.05739	5.95709	125
Chr1A	518252278	518252453	Infected_peak_661	31.2525	-	1	175	0	TraesCS1A03G0809200	5.01839	2.49028e-10	3.90883e-10	9.60375	9.40795	175
Chr1A	518779697	518779872	Infected_peak_662	19.6367	-	1	175	0	TraesCS1A03G0811400	7.43306	9.76423e-07	1.22681e-06	6.01036	5.91122	175
Chr1A	518785815	518786115	Infected_peak_663	216.407	-	1	300	0	TraesCS1A03G0811600	4.8449	5.01935e-67	7.1618e-66	66.2994	65.145	300
Chr1A	519802931	519802981	Infected_peak_664	16.7371	-	1	50	0	TraesCS1A03G0815700	4.63356	7.81861e-06	9.1546e-06	5.10687	5.03836	50
Chr1A	519803156	519803281	Infected_peak_665	25.2557	-	1	125	0	TraesCS1A03G0815700	4.8696	1.77019e-08	2.49626e-08	7.75198	7.60271	125
Chr1A	520712388	520712513	Infected_peak_666	54.2546	-	1	125	0	TraesCS1A03G0818800	3.74478	2.06895e-17	4.65311e-17	16.6843	16.3323	125
Chr1A	522071899	522071949	Infected_peak_667	18.483	-	1	50	0	TraesCS1A03G0822500	5.22268	2.23455e-06	2.72944e-06	5.65081	5.56393	50
Chr1A	522071974	522072199	Infected_peak_668	103.921	-	1	225	0	TraesCS1A03G0822500	4.66234	1.19144e-32	5.20771e-32	31.9239	31.2834	225
Chr1A	522308971	522309046	Infected_peak_669	21.52	-	1	75	0	TraesCS1A03G0823600	4.59592	2.54205e-07	3.32537e-07	6.59482	6.47816	75
Chr1A	522539160	522539260	Infected_peak_670	15.8698	-	1	100	0	TraesCS1A03G0824600	4.61824	1.45827e-05	1.67001e-05	4.83616	4.77728	100
Chr1A	523067728	523067778	Infected_peak_671	11.3729	-	1	50	0	TraesCS1A03G0826800	5.5143	0.000367388	0.000377076	3.43488	3.42357	50
Chr1A	524658512	524658587	Infected_peak_672	36.1656	-	1	75	0	TraesCS1A03G0830600	4.1157	7.58137e-12	1.29738e-11	11.1203	10.8869	75
Chr1A	529640454	529640554	Infected_peak_673	35.7736	-	1	100	0	TraesCS1A03G0836000	3.94714	1.00196e-11	1.7024e-11	10.9991	10.7689	100
Chr1A	530914016	530914191	Infected_peak_674	35.5302	-	1	175	0	TraesCS1A03G0837600	4.42057	1.19122e-11	2.01534e-11	10.924	10.6957	175
Chr1A	531874478	531874753	Infected_peak_675	94.738	-	1	275	0	TraesCS1A03G0839100	5.35274	7.74547e-30	3.02702e-29	29.111	28.519	275
Chr1A	531874778	531874828	Infected_peak_676	40.1361	-	1	50	0	TraesCS1A03G0839100	3.7818	4.53473e-13	8.27629e-13	12.3434	12.0822	50
Chr1A	532255696	532255921	Infected_peak_677	100.868	-	1	225	0	TraesCS1A03G0840000	4.11169	1.02909e-31	4.32353e-31	30.9875	30.3642	225
Chr1A	532393038	532393238	Infected_peak_678	52.4047	-	1	200	0	TraesCS1A03G0841000	4.84101	7.68323e-17	1.6773e-16	16.1145	15.7754	200
Chr1A	532544314	532544364	Infected_peak_679	12.3644	-	1	50	0	TraesCS1A03G0842700	5.75155	0.000181604	0.00018964	3.74088	3.72207	50
Chr1A	532711345	532711595	Infected_peak_680	90.3174	-	1	250	0	TraesCS1A03G0843400	6.23544	1.75133e-28	6.48276e-28	27.7566	27.1882	250
Chr1A	533282386	533282486	Infected_peak_681	15.3933	-	1	100	0	TraesCS1A03G0845300,TraesCS1A03G0845500	4.62095	2.05477e-05	2.32363e-05	4.68724	4.63383	100
Chr1A	534479118	534479243	Infected_peak_682	47.9939	-	1	125	0	TraesCS1A03G0850600	4.71133	1.73239e-15	3.56783e-15	14.7614	14.4476	125
Chr1A	535146167	535146467	Infected_peak_683	173.121	-	1	300	0	TraesCS1A03G0853300	5.53361	8.21125e-54	7.67989e-53	53.0856	52.1146	300
Chr1A	535984704	535984754	Infected_peak_684	41.3338	-	1	50	0	TraesCS1A03G0855800	4.07942	1.94094e-13	3.60819e-13	12.712	12.4427	50
Chr1A	535991128	535991353	Infected_peak_685	117.266	-	1	225	0	TraesCS1A03G0855900	4.91302	9.74164e-37	5.00502e-36	36.0114	35.3006	225
Chr1A	536736620	536736770	Infected_peak_686	47.7823	-	1	150	0	TraesCS1A03G0858300	4.21821	2.0137e-15	4.13148e-15	14.696	14.3839	150
Chr1A	537020647	537020822	Infected_peak_687	159.511	-	1	175	0	TraesCS1A03G0859900	4.78747	1.18109e-49	9.60354e-49	48.9277	48.0176	175
Chr1A	537029661	537029736	Infected_peak_688	28.0299	-	1	75	0	TraesCS1A03G0860000	5.49994	2.45727e-09	3.64894e-09	8.60955	8.43783	75
Chr1A	538326664	538326864	Infected_peak_689	63.2401	-	1	200	0	TraesCS1A03G0864500	5.16083	3.59913e-20	9.17975e-20	19.4438	19.0372	200
Chr1A	538361047	538361247	Infected_peak_690	42.9526	-	1	200	0	TraesCS1A03G0865000	4.82621	6.15482e-14	1.1748e-13	13.2108	12.93	200
Chr1A	538644764	538645089	Infected_peak_691	104.553	-	1	325	0	TraesCS1A03G0866200	5.08432	7.62876e-33	3.35996e-32	32.1175	31.4737	325
Chr1A	539225833	539226108	Infected_peak_692	267.861	-	1	275	0	TraesCS1A03G0868900	4.10267	1.01641e-82	2.32189e-81	81.9929	80.6342	275
Chr1A	539229380	539229480	Infected_peak_693	54.2779	-	1	100	0	TraesCS1A03G0868900	4.85166	2.03469e-17	4.57838e-17	16.6915	16.3393	100
Chr1A	539509215	539509290	Infected_peak_694	17.6229	-	1	75	0	TraesCS1A03G0869500	5.12802	4.14685e-06	4.95415e-06	5.38228	5.30503	75
Chr1A	539509315	539509365	Infected_peak_695	29.832	-	1	50	0	TraesCS1A03G0869500	4.75708	6.83095e-10	1.04637e-09	9.16552	8.98031	50
Chr1A	539648978	539649128	Infected_peak_696	34.4893	-	1	150	0	TraesCS1A03G0869900	4.65762	2.4941e-11	4.14655e-11	10.6031	10.3823	150
Chr1A	541087413	541087538	Infected_peak_697	20.4899	-	1	125	0	TraesCS1A03G0871500	4.9248	5.30804e-07	6.79101e-07	6.27507	6.16807	125
Chr1A	541897874	541898149	Infected_peak_698	349.562	-	1	275	0	TraesCS1A03G0874600	5.01515	1.14043e-107	5.90511e-106	106.943	105.229	275
Chr1A	542155812	542155937	Infected_peak_699	25.3345	-	1	125	0	TraesCS1A03G0876000	4.14794	1.67286e-08	2.3635e-08	7.77654	7.62644	125
Chr1A	543213650	543213825	Infected_peak_700	28.2259	-	1	175	0	TraesCS1A03G0879700	5.03075	2.13692e-09	3.18541e-09	8.67021	8.49683	175
Chr1A	543379563	543379738	Infected_peak_701	121.434	-	1	175	0	TraesCS1A03G0880000	5.13935	5.15604e-38	2.78523e-37	37.2877	36.5551	175
Chr1A	543382699	543382824	Infected_peak_702	20.8927	-	1	125	0	TraesCS1A03G0880000	4.65123	3.98328e-07	5.13659e-07	6.39976	6.28932	125
Chr1A	543739547	543739597	Infected_peak_703	18.635	-	1	50	0	TraesCS1A03G0881400	4.53437	2.00222e-06	2.4564e-06	5.69849	5.6097	50
Chr1A	544181903	544182153	Infected_peak_704	68.6062	-	1	250	0	TraesCS1A03G0882700	5.07549	8.07124e-22	2.22576e-21	21.0931	20.6525	250
Chr1A	545667185	545667310	Infected_peak_705	65.9319	-	1	125	0	TraesCS1A03G0885500	4.78439	5.34303e-21	1.42078e-20	20.2722	19.8475	125
Chr1A	545686176	545686351	Infected_peak_706	34.3593	-	1	175	0	TraesCS1A03G0885600	5.01798	2.73516e-11	4.53759e-11	10.563	10.3432	175
Chr1A	545786399	545786449	Infected_peak_707	28.8559	-	1	50	0	TraesCS1A03G0886300	4.92323	1.36527e-09	2.05833e-09	8.86478	8.68648	50
Chr1A	546101380	546101555	Infected_peak_708	156.912	-	1	175	0	TraesCS1A03G0887700	4.50057	7.36888e-49	5.81953e-48	48.1326	47.2351	175
Chr1A	546323845	546323945	Infected_peak_709	17.2548	-	1	100	0	TraesCS1A03G0889200	8.46666	5.39377e-06	6.39421e-06	5.26811	5.19421	100
Chr1A	547249540	547249615	Infected_peak_710	18.7152	-	1	75	0	TraesCS1A03G0891900	4.55183	1.89071e-06	2.32356e-06	5.72338	5.63385	75
Chr1A	548224148	548224248	Infected_peak_711	54.6778	-	1	100	0	TraesCS1A03G0895300	3.77361	1.53247e-17	3.47015e-17	16.8146	16.4597	100
Chr1A	549072543	549072768	Infected_peak_712	111.341	-	1	225	0	TraesCS1A03G0896900	4.12325	6.35631e-35	3.04014e-34	34.1968	33.5171	225
Chr1A	549085462	549085612	Infected_peak_713	327.251	-	1	150	0	TraesCS1A03G0897000	4.72099	7.24577e-101	3.07455e-99	100.14	98.5122	150
Chr1A	549664459	549664609	Infected_peak_714	34.791	-	1	150	0	TraesCS1A03G0899400	5.30287	2.01503e-11	3.36416e-11	10.6957	10.4731	150
Chr1A	550816043	550816218	Infected_peak_715	28.0996	-	1	175	0	TraesCS1A03G0903700	5.1429	2.33791e-09	3.47689e-09	8.63117	8.45881	175
Chr1A	551289065	551289265	Infected_peak_716	85.7966	-	1	200	0	TraesCS1A03G0906100	5.36406	4.28201e-27	1.48821e-26	26.3684	25.8273	200
Chr1A	552238649	552238824	Infected_peak_717	240.585	-	1	175	0	TraesCS1A03G0910800	4.21298	2.12244e-74	3.77265e-73	73.6732	72.4234	175
Chr1A	552336564	552336889	Infected_peak_718	287.644	-	1	325	0	TraesCS1A03G0911100	5.55999	9.23497e-89	2.57369e-87	88.0346	86.5894	325
Chr1A	552939220	552939320	Infected_peak_719	52.5081	-	1	100	0	TraesCS1A03G0914100	4.34397	7.14236e-17	1.56132e-16	16.1462	15.8065	100
Chr1A	553370961	553371111	Infected_peak_720	47.6049	-	1	150	0	TraesCS1A03G0916800	5.42806	2.28233e-15	4.67189e-15	14.6416	14.3305	150
Chr1A	553894812	553894987	Infected_peak_721	161.616	-	1	175	0	TraesCS1A03G0920500	4.33129	2.68229e-50	2.23179e-49	49.5715	48.6513	175
Chr1A	553896940	553897015	Infected_peak_722	15.9468	-	1	75	0	TraesCS1A03G0920500	5.51732	1.38015e-05	1.58319e-05	4.86007	4.80047	75
Chr1A	556531456	556531556	Infected_peak_723	76.4513	-	1	100	0	TraesCS1A03G0936500	3.76411	3.15425e-24	9.68003e-24	23.5011	23.0141	100
Chr1A	558288141	558288516	Infected_peak_724	213.094	-	1	375	0	TraesCS1A03G0945000,TraesCS1A03G0945100	5.07404	5.14215e-66	7.11537e-65	65.2889	64.1478	375
Chr1A	558294685	558294735	Infected_peak_725	18.2092	-	1	50	0	TraesCS1A03G0945100	4.72856	2.71859e-06	3.29969e-06	5.56566	5.48153	50
Chr1A	558782625	558782775	Infected_peak_726	30.0747	-	1	150	0	TraesCS1A03G0946300	5.39337	5.75136e-10	8.84337e-10	9.24023	9.05338	150
Chr1A	558922897	558923047	Infected_peak_727	29.3573	-	1	150	0	TraesCS1A03G0947000	4.14128	9.56768e-10	1.45399e-09	9.01919	8.83744	150
Chr1A	559473550	559473700	Infected_peak_728	13.9105	-	1	150	0	TraesCS1A03G0950000	5.45129	5.97992e-05	6.49394e-05	4.2233	4.18749	150
Chr1A	560584704	560585400	Infected_peak_729	65.9343	-	2	70130	0,566	TraesCS1A03G0954600	4.94838	5.3326e-21	1.41843e-20	20.2731	19.8482	696
Chr1A	563457046	563457196	Infected_peak_730	26.4995	-	1	150	0	TraesCS1A03G0964300	4.50893	7.2995e-09	1.05406e-08	8.13671	7.97713	150
Chr1A	564937009	564937184	Infected_peak_731	68.6937	-	1	175	0	TraesCS1A03G0967800	5.95408	7.58098e-22	2.09477e-21	21.1203	20.6789	175
Chr1A	565125995	565126145	Infected_peak_732	58.1387	-	1	150	0	TraesCS1A03G0968800LC	6.62086	1.32447e-18	3.15135e-18	17.878	17.5015	150
Chr1A	565378587	565378637	Infected_peak_733	17.0047	-	1	50	0	TraesCS1A03G0969900	6.96535	6.45286e-06	7.60432e-06	5.19025	5.11894	50
Chr1A	566588312	566588387	Infected_peak_734	5.34536	-	1	75	0	TraesCS1A03G0977000	0.333839	0.0241428	0.0245972	1.61721	1.60911	75
Chr1A	569660471	569660546	Infected_peak_735	14.5757	-	1	75	0	TraesCS1A03G0986200	7.76107	3.70771e-05	4.09512e-05	4.43089	4.38773	75
Chr1A	569661048	569661348	Infected_peak_736	191.334	-	1	300	0	TraesCS1A03G0986300	5.06187	2.25157e-59	2.5281e-58	58.6475	57.5972	300
Chr1A	572974030	572974155	Infected_peak_737	74.0655	-	1	125	0	TraesCS1A03G0995700	3.77809	1.70205e-23	5.05915e-23	22.769	22.2959	125
Chr1A	575670305	575670355	Infected_peak_738	10.6818	-	1	50	0	TraesCS1A03G1004700	6.47431	0.000594842	0.00060878	3.2256	3.21554	50
Chr1A	575984137	575984187	Infected_peak_739	12.7005	-	1	50	0	TraesCS1A03G1005700	7.23852	0.000142981	0.000150239	3.84472	3.82322	50
Chr1A	576120552	576120802	Infected_peak_740	233.104	-	1	250	0	TraesCS1A03G1006500	3.90809	4.08743e-72	6.74219e-71	71.3885	70.1712	250
Chr1A	576123916	576123966	Infected_peak_741	25.8218	-	1	50	0	TraesCS1A03G1006500	4.03024	1.18203e-08	1.68603e-08	7.92737	7.77313	50
Chr1A	576826442	576826692	Infected_peak_742	463.242	-	1	250	0	TraesCS1A03G1008400	5.90656	2.30472e-142	3.54926e-140	141.637	139.45	250
Chr1A	576836519	576836696	Infected_peak_743	34.0044	-	2	12,76	0,101	TraesCS1A03G1008600	4.18224	3.52125e-11	5.80291e-11	10.4533	10.2364	177
Chr1A	577269274	577269449	Infected_peak_744	124.183	-	1	175	0	TraesCS1A03G1011400	3.99574	7.44746e-39	4.14072e-38	38.128	37.3829	175
Chr1A	578102080	578102255	Infected_peak_745	68.6716	-	1	175	0	TraesCS1A03G1014100	3.9714	7.70396e-22	2.1271e-21	21.1133	20.6722	175
Chr1A	578404890	578405822	Infected_peak_746	53.1579	-	2	82,68	0,864	TraesCS1A03G1015700	4.28197	4.50895e-17	9.95155e-17	16.3459	16.0021	932
Chr1A	578423451	578423501	Infected_peak_747	11.506	-	1	50	0	TraesCS1A03G1015800	6.77439	0.000334741	0.000343826	3.47529	3.46366	50
Chr1A	578569490	578569565	Infected_peak_748	16.6509	-	1	75	0	TraesCS1A03G1016500LC	8.63525	8.31753e-06	9.71775e-06	5.08001	5.01243	75
Chr1A	579498769	579498944	Infected_peak_749	75.1921	-	1	175	0	TraesCS1A03G1020700	3.87399	7.68075e-24	2.31694e-23	23.1146	22.6351	175
Chr1A	580421542	580421617	Infected_peak_750	14.6396	-	1	75	0	TraesCS1A03G1025400	5.5874	3.54221e-05	3.9179e-05	4.45073	4.40695	75
Chr1A	580421642	580421692	Infected_peak_751	11.7361	-	1	50	0	TraesCS1A03G1025400	5.6206	0.000284486	0.00029315	3.54594	3.53291	50
Chr1A	581060547	581060772	Infected_peak_752	66.7745	-	1	225	0	TraesCS1A03G1026800	4.50466	2.94885e-21	7.92273e-21	20.5303	20.1011	225
Chr1A	581287179	581287329	Infected_peak_753	4.74246	-	1	150	0	TraesCS1A03G1027700	0.155392	0.0369434	0.0373575	1.43246	1.42762	150
Chr1A	581762802	581762927	Infected_peak_754	46.0298	-	1	125	0	TraesCS1A03G1029800	3.83449	6.96937e-15	1.392e-14	14.1568	13.8564	125
Chr1A	583420337	583420487	Infected_peak_755	76.7987	-	1	150	0	TraesCS1A03G1033000	3.72015	2.4706e-24	7.60813e-24	23.6072	23.1187	150
Chr1A	584162074	584162149	Infected_peak_756	84.8035	-	1	75	0	TraesCS1A03G1034200LC,TraesCS1A03G1034300LC	4.10909	8.62926e-27	2.9622e-26	26.064	25.5284	75
Chr1A	584182315	584182490	Infected_peak_757	72.3946	-	1	175	0	TraesCS1A03G1034500	3.72942	5.52835e-23	1.6108e-22	22.2574	21.793	175
Chr1A	585930291	585930491	Infected_peak_758	220.242	-	1	200	0	TraesCS1A03G1039300	5.24788	3.40168e-68	5.01797e-67	67.4683	66.2995	200
Chr1A	585936265	585936413	Infected_peak_759	4.6252	-	2	66,9	0,139	TraesCS1A03G1039300	0.154887	0.0403256	0.0405206	1.39442	1.39232	148
Chr1A	586773690	586773940	Infected_peak_760	172.002	-	1	250	0	TraesCS1A03G1043200	4.48084	1.80737e-53	1.66771e-52	52.743	51.7779	250
Chr1A	587063601	587064051	Infected_peak_761	277.653	-	1	450	0	TraesCS1A03G1044100	4.6419	1.04106e-85	2.61938e-84	84.9825	83.5818	450
Chr1A	587225315	587225440	Infected_peak_762	16.1389	-	1	125	0	TraesCS1A03G1045900	4.32846	1.20195e-05	1.3858e-05	4.92012	4.8583	125
Chr1A	588807432	588807607	Infected_peak_763	40.4374	-	1	175	0	TraesCS1A03G1052000	4.75138	3.65932e-13	6.71633e-13	12.4366	12.1729	175
Chr1A	591265676	591265876	Infected_peak_764	44.6526	-	1	200	0	TraesCS1A03G1061900	4.69682	1.84933e-14	3.61606e-14	13.733	13.4418	200
Chr1A	591307245	591307445	Infected_peak_765	127.117	-	1	200	0	TraesCS1A03G1062100	4.14295	9.4728e-40	5.42031e-39	39.0235	38.266	200
Chr1A	592861813	592862038	Infected_peak_766	122.32	-	1	225	0	TraesCS1A03G1065900	4.67294	2.76241e-38	1.50634e-37	37.5587	36.8221	225
Chr1A	593055286	593055361	Infected_peak_767	16.6947	-	1	75	0	TraesCS1A03G1067100	4.96426	8.05826e-06	9.42778e-06	5.09376	5.02559	75
Chr1A	593055436	593055486	Infected_peak_768	22.6244	-	1	50	0	TraesCS1A03G1067100	4.34227	1.15518e-07	1.54659e-07	6.93735	6.81063	50
Chr1A	593327523	593327936	Infected_peak_769	171.652	-	2	295,30	0,383	TraesCS1A03G1067600LC	3.98685	2.30891e-53	2.1261e-52	52.6366	51.6724	413
Chr1A	594564797	594564847	Infected_peak_770	17.1472	-	1	50	0	TraesCS1A03G1074800	4.54619	5.82523e-06	6.88924e-06	5.23469	5.16183	50
Chr1A	594903750	594903925	Infected_peak_771	69.648	-	1	175	0	TraesCS1A03G1076200	3.3941	3.85681e-22	1.08109e-21	21.4138	20.9661	175
Chr1A	595644823	595645098	Infected_peak_772	163.035	-	1	275	0	TraesCS1A03G1079400	4.89476	9.90939e-51	8.35007e-50	50.004	49.0783	275
Chr1A	595708918	595709043	Infected_peak_773	43.7117	-	1	125	0	TraesCS1A03G1079700	3.8806	3.59752e-14	6.94168e-14	13.444	13.1585	125
Chr1A	595713178	595713253	Infected_peak_774	12.0601	-	1	75	0	TraesCS1A03G1079700	5.73316	0.000225626	0.000234187	3.64661	3.63044	75
Chr1A	596162672	596162797	Infected_peak_775	27.4392	-	1	125	0	TraesCS1A03G1080600	4.00309	3.74035e-09	5.49532e-09	8.42709	8.26001	125
Chr1A	596509441	596509591	Infected_peak_776	19.9543	-	1	150	0	TraesCS1A03G1081200	8.96262	7.78547e-07	9.84356e-07	6.10872	6.00685	150
Chr1A	596872414	596872539	Infected_peak_777	16.3368	-	1	125	0	TraesCS1A03G1082100	5.39058	1.04192e-05	1.20816e-05	4.98217	4.91788	125
Chr1A	598113027	598113202	Infected_peak_778	38.1035	-	1	175	0	TraesCS1A03G1086000	5.1007	1.91315e-12	3.38616e-12	11.7183	11.4703	175
Chr1B	1191885	1191935	Infected_peak_779	36.6751	+	1	50	0	TraesCS1B03G0001600	4.85972	5.27913e-12	9.11348e-12	11.2774	11.0403	50
Chr1B	1243980	1244030	Infected_peak_780	15.4253	+	1	50	0	TraesCS1B03G0002200	5.37479	2.00773e-05	2.27259e-05	4.69729	4.64348	50
Chr1B	1244055	1244105	Infected_peak_781	12.9783	+	1	50	0	TraesCS1B03G0002200	6.05055	0.000117214	0.000123918	3.93102	3.90686	50
Chr1B	1247111	1247236	Infected_peak_782	42.8259	+	1	125	0	TraesCS1B03G0002400	4.18205	6.73852e-14	1.28265e-13	13.1714	12.8919	125
Chr1B	4934083	4934208	Infected_peak_783	18.2528	+	1	125	0	TraesCS1B03G0016200	4.54596	2.6351e-06	3.20162e-06	5.5792	5.49463	125
Chr1B	5615171	5615371	Infected_peak_784	140.641	+	1	200	0	TraesCS1B03G0020700	3.91381	6.94453e-44	4.60153e-43	43.1584	42.3371	200
Chr1B	6926228	6926278	Infected_peak_785	15.4144	+	1	50	0	TraesCS1B03G0027900	4.44805	2.02352e-05	2.28989e-05	4.69389	4.64018	50
Chr1B	6930688	6930863	Infected_peak_786	20.1637	+	1	175	0	TraesCS1B03G0028000	5.17348	6.69949e-07	8.51388e-07	6.17396	6.06987	175
Chr1B	9202405	9202580	Infected_peak_787	42.569	+	1	175	0	TraesCS1B03G0036800	4.02369	8.08802e-14	1.53267e-13	13.0922	12.8146	175
Chr1B	10356195	10356359	Infected_peak_788	49.4956	+	1	164	0	TraesCS1B03G0042600	4.09866	6.01099e-16	1.25989e-15	15.2211	14.8997	164
Chr1B	12379517	12379692	Infected_peak_789	99.3286	+	1	175	0	TraesCS1B03G0048800	3.85773	3.05374e-31	1.25638e-30	30.5152	29.9009	175
Chr1B	16011010	16011160	Infected_peak_790	30.0997	+	1	150	0	TraesCS1B03G0062200LC	4.16659	5.64854e-10	8.69127e-10	9.24806	9.06092	150
Chr1B	18206564	18206739	Infected_peak_791	27.0063	+	1	175	0	TraesCS1B03G0073000	4.78999	5.09197e-09	7.41828e-09	8.29311	8.1297	175
Chr1B	18509376	18509451	Infected_peak_792	14.521	+	1	75	0	TraesCS1B03G0074200LC	5.45011	3.85583e-05	4.25346e-05	4.41388	4.37126	75
Chr1B	18609240	18609415	Infected_peak_793	28.9907	+	1	175	0	TraesCS1B03G0075200	4.40646	1.2407e-09	1.87464e-09	8.90633	8.72708	175
Chr1B	21384257	21384442	Infected_peak_794	138.997	+	1	185	0	TraesCS1B03G0084600	4.87271	2.20291e-43	1.43833e-42	42.657	41.8421	185
Chr1B	25519489	25519662	Infected_peak_795	68.1582	+	1	173	0	TraesCS1B03G0093700	5.09325	1.10854e-21	3.03634e-21	20.9552	20.5176	173
Chr1B	27651129	27652698	Infected_peak_796	486.334	+	2	252,98	0,1471	TraesCS1B03G0099700,TraesCS1B03G0099800LC	6.25721	2.04491e-149	3.97068e-147	148.689	146.401	1569
Chr1B	30675380	30675555	Infected_peak_797	17.1509	+	1	175	0	TraesCS1B03G0109900	5.87936	5.80913e-06	6.87156e-06	5.23589	5.16294	175
Chr1B	34091446	34091521	Infected_peak_798	46.7283	+	1	75	0	TraesCS1B03G0116100	3.75433	4.24368e-15	8.57762e-15	14.3723	14.0666	75
Chr1B	34945075	34945362	Infected_peak_799	94.7693	+	1	287	0	TraesCS1B03G0117900	4.35734	7.57433e-30	2.96208e-29	29.1207	28.5284	287
Chr1B	36184507	36184707	Infected_peak_800	106.74	+	1	200	0	TraesCS1B03G0121100	4.25267	1.62155e-33	7.3802e-33	32.7901	32.1319	200
Chr1B	36184757	36184807	Infected_peak_801	14.3801	+	1	50	0	TraesCS1B03G0121100	4.42688	4.26619e-05	4.68992e-05	4.36996	4.32883	50
Chr1B	36525053	36525203	Infected_peak_802	16.0759	+	1	150	0	TraesCS1B03G0121900	5.27175	1.25767e-05	1.44771e-05	4.90043	4.83932	150
Chr1B	42092008	42092158	Infected_peak_803	47.6926	+	1	150	0	TraesCS1B03G0128900	4.25685	2.14649e-15	4.39635e-15	14.6683	14.3569	150
Chr1B	43284119	43284437	Infected_peak_804	242.148	+	1	318	0	TraesCS1B03G0131000	5.728	7.09238e-75	1.2772e-73	74.1492	72.8937	318
Chr1B	44221648	44221748	Infected_peak_805	4.30601	+	1	100	0	TraesCS1B03G0134900	0.155737	0.0504134	0.0505549	1.29745	1.29624	100
Chr1B	44553868	44554143	Infected_peak_806	66.0401	+	1	275	0	TraesCS1B03G0136000	5.2782	4.94879e-21	1.3181e-20	20.3055	19.8801	275
Chr1B	46407067	46407142	Infected_peak_807	15.0302	+	1	75	0	TraesCS1B03G0141200	4.77671	2.67102e-05	2.98855e-05	4.57332	4.52454	75
Chr1B	46915110	46915260	Infected_peak_808	50.9956	+	1	150	0	TraesCS1B03G0142800	4.61764	2.08253e-16	4.4543e-16	15.6814	15.3512	150
Chr1B	47887527	47887927	Infected_peak_809	549.002	+	1	400	0	TraesCS1B03G0143700	5.95945	1.66861e-168	5.41964e-166	167.778	165.266	400
Chr1B	48011818	48011868	Infected_peak_810	12.2036	+	1	50	0	TraesCS1B03G0143900	5.83503	0.000203671	0.000212002	3.69107	3.67366	50
Chr1B	48016890	48017084	Infected_peak_811	140.52	+	1	194	0	TraesCS1B03G0143900	4.88684	7.55868e-44	5.00476e-43	43.1216	42.3006	194
Chr1B	52451189	52451364	Infected_peak_812	37.3392	+	1	175	0	TraesCS1B03G0152600	4.20728	3.2933e-12	5.75145e-12	11.4824	11.2402	175
Chr1B	55419971	55420131	Infected_peak_813	22.8239	+	1	160	0	TraesCS1B03G0163900LC	5.01292	1.00199e-07	1.34685e-07	6.99914	6.87068	160
Chr1B	58555173	58555236	Infected_peak_814	29.3726	+	1	63	0	TraesCS1B03G0173000	4.04214	9.46428e-10	1.43865e-09	9.02391	8.84205	63
Chr1B	60386136	60386381	Infected_peak_815	109.57	+	2	110115	0,130	TraesCS1B03G0176700	4.8949	2.21409e-34	1.03812e-33	33.6548	32.9838	245
Chr1B	60386431	60386531	Infected_peak_816	26.59	+	1	100	0	TraesCS1B03G0176700	4.64153	6.84506e-09	9.89962e-09	8.16462	8.00438	100
Chr1B	61807978	61808053	Infected_peak_817	28.2504	+	1	75	0	TraesCS1B03G0182400	4.22469	2.09938e-09	3.13181e-09	8.67791	8.50421	75
Chr1B	62378351	62378501	Infected_peak_818	42.681	+	1	150	0	TraesCS1B03G0183800	5.43982	7.4688e-14	1.41818e-13	13.1267	12.8483	150
Chr1B	67699321	67699521	Infected_peak_819	37.3038	+	1	200	0	TraesCS1B03G0199400	4.62946	3.37744e-12	5.89435e-12	11.4714	11.2296	200
Chr1B	68513882	68514032	Infected_peak_820	31.2468	+	1	150	0	TraesCS1B03G0202500	4.14359	2.50041e-10	3.92438e-10	9.60199	9.40623	150
Chr1B	68836844	68836944	Infected_peak_821	41.9963	+	1	100	0	TraesCS1B03G0202700	5.44436	1.21304e-13	2.27958e-13	12.9161	12.6421	100
Chr1B	73219831	73219956	Infected_peak_822	40.676	+	1	125	0	TraesCS1B03G0212900	4.06956	3.09383e-13	5.69248e-13	12.5095	12.2447	125
Chr1B	73851645	73851818	Infected_peak_823	104.498	+	1	173	0	TraesCS1B03G0213800	4.52305	7.9308e-33	3.49041e-32	32.1007	31.4571	173
Chr1B	75657452	75657652	Infected_peak_824	37.3413	+	1	200	0	TraesCS1B03G0217600	4.77787	3.2883e-12	5.74327e-12	11.483	11.2408	200
Chr1B	75657827	75657977	Infected_peak_825	43.1344	+	1	150	0	TraesCS1B03G0217600	4.88383	5.41406e-14	1.03573e-13	13.2665	12.9848	150
Chr1B	76081872	76082072	Infected_peak_826	29.3929	+	1	200	0	TraesCS1B03G0218600	6.22866	9.32925e-10	1.41861e-09	9.03015	8.84814	200
Chr1B	77370377	77370452	Infected_peak_827	22.4027	+	1	75	0	TraesCS1B03G0219600LC	4.9347	1.35576e-07	1.80351e-07	6.86782	6.74388	75
Chr1B	89756985	89757160	Infected_peak_828	23.2118	+	1	175	0	TraesCS1B03G0230600	6.0237	7.59774e-08	1.02932e-07	7.11932	6.98745	175
Chr1B	96905737	96905937	Infected_peak_829	48.5025	+	1	200	0	TraesCS1B03G0239000	4.05757	1.21148e-15	2.50774e-15	14.9167	14.6007	200
Chr1B	98142948	98142998	Infected_peak_830	12.1331	+	1	50	0	TraesCS1B03G0241000	5.08659	0.000214144	0.000222631	3.66929	3.65241	50
Chr1B	100170880	100171050	Infected_peak_831	61.5996	+	1	170	0	TraesCS1B03G0244600	5.43967	1.14852e-19	2.86194e-19	18.9399	18.5433	170
Chr1B	105039344	105039419	Infected_peak_832	17.8805	+	1	75	0	TraesCS1B03G0256200LC	8.58426	3.44857e-06	4.14416e-06	5.46236	5.38256	75
Chr1B	105210387	105210535	Infected_peak_833	21.6515	+	1	148	0	TraesCS1B03G0256400	7.78646	2.31454e-07	3.03553e-07	6.63554	6.51777	148
Chr1B	106436964	106437164	Infected_peak_834	157.495	+	1	200	0	TraesCS1B03G0257900LC	4.49711	4.88426e-49	3.88479e-48	48.3112	47.4106	200
Chr1B	113390262	113390355	Infected_peak_835	140.323	+	1	93	0	TraesCS1B03G0267200	3.78913	8.68331e-44	5.73664e-43	43.0613	42.2413	93
Chr1B	116843794	116843933	Infected_peak_836	86.4883	+	1	139	0	TraesCS1B03G0271000	3.87822	2.62782e-27	9.21362e-27	26.5804	26.0356	139
Chr1B	118977750	118977850	Infected_peak_837	73.0769	+	1	100	0	TraesCS1B03G0275700	3.69841	3.41429e-23	1.00383e-22	22.4667	21.9983	100
Chr1B	120569757	120569847	Infected_peak_838	31.697	+	1	90	0	TraesCS1B03G0279400LC	4.31256	1.81731e-10	2.87245e-10	9.74057	9.54175	90
Chr1B	122166971	122167159	Infected_peak_839	51.4393	+	1	188	0	TraesCS1B03G0281600	3.97461	1.52101e-16	3.27523e-16	15.8179	15.4848	188
Chr1B	123181514	123181564	Infected_peak_840	30.2475	+	1	50	0	TraesCS1B03G0282900	4.1412	5.08419e-10	7.84521e-10	9.29378	9.1054	50
Chr1B	123392309	123392634	Infected_peak_841	166.63	+	1	325	0	TraesCS1B03G0283100	4.67234	7.88063e-52	6.90773e-51	51.1034	50.1607	325
Chr1B	123392659	123392734	Infected_peak_842	22.0867	+	1	75	0	TraesCS1B03G0283100	4.15806	1.69744e-07	2.24516e-07	6.7702	6.64875	75
Chr1B	125265745	125265892	Infected_peak_843	90.2909	+	1	147	0	TraesCS1B03G0288400	5.37787	1.78493e-28	6.60302e-28	27.7484	27.1803	147
Chr1B	126095661	126095885	Infected_peak_844	90.4782	+	1	224	0	TraesCS1B03G0290400	4.9778	1.56366e-28	5.7989e-28	27.8059	27.2367	224
Chr1B	130123056	130123231	Infected_peak_845	43.3476	+	1	175	0	TraesCS1B03G0298000	4.44543	4.65475e-14	8.93441e-14	13.3321	13.0489	175
Chr1B	138163467	138163665	Infected_peak_846	188.36	+	1	198	0	TraesCS1B03G0306100	7.6848	1.83659e-58	1.98601e-57	57.736	56.702	198
Chr1B	139203290	139203390	Infected_peak_847	28.4502	+	1	100	0	TraesCS1B03G0307100LC,TraesCS1B03G0307200	4.88077	1.82153e-09	2.72665e-09	8.73956	8.56437	100
Chr1B	144929704	144929879	Infected_peak_848	53.9971	+	1	175	0	TraesCS1B03G0322100	7.90826	2.48498e-17	5.56217e-17	16.6047	16.2548	175
Chr1B	146014404	146014554	Infected_peak_849	53.6946	+	1	150	0	TraesCS1B03G0323800	3.71625	3.0789e-17	6.85975e-17	16.5116	16.1637	150
Chr1B	148621896	148621971	Infected_peak_850	37.3527	+	1	75	0	TraesCS1B03G0326400	4.22081	3.26073e-12	5.6979e-12	11.4867	11.2443	75
Chr1B	149416984	149417134	Infected_peak_851	12.5853	+	1	150	0	TraesCS1B03G0328700LC	7.13498	0.000155241	0.00016272	3.80899	3.78856	150
Chr1B	155217929	155218129	Infected_peak_852	72.7284	+	1	200	0	TraesCS1B03G0335700	4.45672	4.36805e-23	1.27815e-22	22.3597	21.8934	200
Chr1B	156978251	156978351	Infected_peak_853	17.8632	+	1	100	0	TraesCS1B03G0337900	7.20923	3.49124e-06	4.19418e-06	5.45702	5.37735	100
Chr1B	156980161	156980211	Infected_peak_854	31.9128	+	1	50	0	TraesCS1B03G0337900	4.05588	1.55818e-10	2.47337e-10	9.80738	9.60671	50
Chr1B	160705357	160705407	Infected_peak_855	13.4936	+	1	50	0	TraesCS1B03G0343800	4.85424	8.08708e-05	8.66996e-05	4.09221	4.06198	50
Chr1B	161951599	161951699	Infected_peak_856	13.1545	+	1	100	0	TraesCS1B03G0344300	6.09954	0.000103304	0.000109677	3.98588	3.95988	100
Chr1B	161973251	161973447	Infected_peak_857	85.0987	+	1	196	0	TraesCS1B03G0344500	5.85563	7.00385e-27	2.41398e-26	26.1547	25.6173	196
Chr1B	162285391	162285516	Infected_peak_858	60.655	+	1	125	0	TraesCS1B03G0345000	4.25819	2.23645e-19	5.50833e-19	18.6504	18.259	125
Chr1B	164435100	164435400	Infected_peak_859	250.687	+	1	300	0	TraesCS1B03G0347500	4.64234	1.76284e-77	3.43417e-76	76.7538	75.4642	300
Chr1B	165923407	165923732	Infected_peak_860	228.399	+	1	325	0	TraesCS1B03G0349500	4.82383	1.11378e-70	1.75765e-69	69.9532	68.7551	325
Chr1B	167734007	167734232	Infected_peak_861	41.3596	+	1	225	0	TraesCS1B03G0352100	6.38327	1.90525e-13	3.54424e-13	12.72	12.4505	225
Chr1B	168518487	168518636	Infected_peak_862	63.7363	+	1	149	0	TraesCS1B03G0354200	4.89055	2.53592e-20	6.50811e-20	19.5959	19.1865	149
Chr1B	169297496	169297571	Infected_peak_863	18.6243	+	1	75	0	TraesCS1B03G0355400	4.75811	2.0177e-06	2.47471e-06	5.69514	5.60648	75
Chr1B	173135338	173135588	Infected_peak_864	158.521	+	1	250	0	TraesCS1B03G0359800	4.28589	2.37284e-49	1.90681e-48	48.6247	47.7197	250
Chr1B	174258315	174258382	Infected_peak_865	25.8073	+	1	67	0	TraesCS1B03G0360800	4.4863	1.19442e-08	1.70302e-08	7.92284	7.76878	67
Chr1B	178139776	178139976	Infected_peak_866	73.1642	+	1	200	0	TraesCS1B03G0366300	5.39609	3.20947e-23	9.44858e-23	22.4936	22.0246	200
Chr1B	181109255	181109305	Infected_peak_867	17.0454	+	1	50	0	TraesCS1B03G0370100	4.63968	6.26592e-06	7.39329e-06	5.20301	5.13116	50
Chr1B	184989265	184989440	Infected_peak_868	64.6144	+	1	175	0	TraesCS1B03G0374900	5.40346	1.36198e-20	3.54103e-20	19.8658	19.4509	175
Chr1B	190329197	190329247	Infected_peak_869	90.0829	+	1	50	0	TraesCS1B03G0380400	3.63823	2.06726e-28	7.62691e-28	27.6846	27.1177	50
Chr1B	191993052	191993127	Infected_peak_870	18.891	+	1	75	0	TraesCS1B03G0383100	6.12829	1.66729e-06	2.05708e-06	5.77799	5.68675	75
Chr1B	191998522	191998816	Infected_peak_871	147.452	+	2	70102	0,192	TraesCS1B03G0383100	3.91608	5.73609e-46	4.09878e-45	45.2414	44.3873	294
Chr1B	192907697	192907847	Infected_peak_872	53.8972	+	1	150	0	TraesCS1B03G0383500	3.81556	2.66922e-17	5.96111e-17	16.5736	16.2247	150
Chr1B	193244940	193245165	Infected_peak_873	226.87	+	1	225	0	TraesCS1B03G0384100	4.12165	3.27108e-70	5.07245e-69	69.4853	68.2948	225
Chr1B	193650502	193650627	Infected_peak_874	36.05	+	1	125	0	TraesCS1B03G0384600	4.2963	8.23189e-12	1.40561e-11	11.0845	10.8521	125
Chr1B	194696784	194696884	Infected_peak_875	38.558	+	1	100	0	TraesCS1B03G0385300,TraesCS1B03G0385400	5.11594	1.38836e-12	2.47102e-12	11.8575	11.6071	100
Chr1B	194698559	194698759	Infected_peak_876	206.627	+	1	200	0	TraesCS1B03G0385300,TraesCS1B03G0385500	3.88163	4.8709e-64	6.29622e-63	63.3124	62.2009	200
Chr1B	194900645	194900820	Infected_peak_877	60.6274	+	1	175	0	TraesCS1B03G0385700	5.17485	2.2803e-19	5.61478e-19	18.642	18.2507	175
Chr1B	196137209	196137450	Infected_peak_878	507.397	+	1	241	0	TraesCS1B03G0388500	5.42833	7.71377e-156	1.81314e-153	155.113	152.742	241
Chr1B	198378664	198378889	Infected_peak_879	294.764	+	1	225	0	TraesCS1B03G0389400	4.15553	6.02822e-91	1.85031e-89	90.2198	88.7328	225
Chr1B	198690351	198690426	Infected_peak_880	27.4537	+	1	75	0	TraesCS1B03G0389900	4.97242	3.70163e-09	5.44023e-09	8.43161	8.26438	75
Chr1B	199694512	199694562	Infected_peak_881	20.8262	+	1	50	0	TraesCS1B03G0391700	5.29037	4.17598e-07	5.37888e-07	6.37924	6.26931	50
Chr1B	204137102	204137226	Infected_peak_882	52.3476	+	1	124	0	TraesCS1B03G0395700LC	4.06212	8.00031e-17	1.74502e-16	16.0969	15.7582	124
Chr1B	205088475	205088599	Infected_peak_883	57.3374	+	1	124	0	TraesCS1B03G0397700	4.29296	2.33609e-18	5.49177e-18	17.6315	17.2603	124
Chr1B	206018661	206018761	Infected_peak_884	41.3053	+	1	100	0	TraesCS1B03G0398200	4.16124	1.98036e-13	3.68013e-13	12.7033	12.4341	100
Chr1B	206738040	206738115	Infected_peak_885	42.8597	+	1	75	0	TraesCS1B03G0399500	5.43192	6.5763e-14	1.25298e-13	13.182	12.9021	75
Chr1B	208194194	208194269	Infected_peak_886	33.1344	+	1	75	0	TraesCS1B03G0400200	4.19176	6.5415e-11	1.0606e-10	10.1843	9.97445	75
Chr1B	208357043	208357143	Infected_peak_887	20.2464	+	1	100	0	TraesCS1B03G0400600LC	4.45739	6.31518e-07	8.03922e-07	6.19961	6.09479	100
Chr1B	222346256	222346606	Infected_peak_888	325.317	+	1	350	0	TraesCS1B03G0411500	6.00271	2.83397e-100	1.17462e-98	99.5476	97.9301	350
Chr1B	223135701	223135926	Infected_peak_889	418.741	+	1	225	0	TraesCS1B03G0413100	5.7572	9.00361e-129	8.83739e-127	128.046	126.054	225
Chr1B	223405284	223405534	Infected_peak_890	230.448	+	1	250	0	TraesCS1B03G0413600	3.69081	2.64449e-71	4.2483e-70	70.5777	69.3718	250
Chr1B	223564115	223564365	Infected_peak_891	23.1496	+	1	250	0	TraesCS1B03G0413700	6.40838	7.94237e-08	1.0747e-07	7.10005	6.96871	250
Chr1B	228419340	228419690	Infected_peak_892	165.934	+	1	350	0	TraesCS1B03G0418900	4.39562	1.28704e-51	1.11936e-50	50.8904	49.951	350
Chr1B	229238936	229239211	Infected_peak_893	123.231	+	1	275	0	TraesCS1B03G0419200	4.37531	1.45451e-38	8.01212e-38	37.8373	37.0963	275
Chr1B	231917661	231917936	Infected_peak_894	127.5	+	1	275	0	TraesCS1B03G0422000	5.17681	7.23061e-40	4.15463e-39	39.1408	38.3815	275
Chr1B	235355822	235355959	Infected_peak_895	123.203	+	1	137	0	TraesCS1B03G0424200	4.65004	1.48526e-38	8.16894e-38	37.8282	37.0878	137
Chr1B	236114328	236114545	Infected_peak_896	240.807	+	1	217	0	TraesCS1B03G0425900	4.65133	1.81329e-74	3.23603e-73	73.7415	72.49	217
Chr1B	255637626	255637701	Infected_peak_897	17.9763	+	1	75	0	TraesCS1B03G0438200	5.46377	3.21486e-06	3.87794e-06	5.49284	5.4114	75
Chr1B	256428633	256428808	Infected_peak_898	67.2982	+	1	175	0	TraesCS1B03G0438300	4.49517	2.03601e-21	5.51079e-21	20.6912	20.2588	175
Chr1B	258145773	258146273	Infected_peak_899	154.031	+	1	500	0	TraesCS1B03G0439800	3.95551	5.5857e-48	4.28621e-47	47.2529	46.3679	500
Chr1B	262286954	262287129	Infected_peak_900	18.028	+	1	175	0	TraesCS1B03G0443100	5.21112	3.09671e-06	3.74135e-06	5.5091	5.42697	175
Chr1B	262304930	262305155	Infected_peak_901	194.853	+	1	225	0	TraesCS1B03G0443100	4.95565	1.8888e-60	2.20533e-59	59.7238	58.6565	225
Chr1B	263014959	263015359	Infected_peak_902	425.688	+	1	400	0	TraesCS1B03G0444200	5.6973	6.77612e-131	7.16264e-129	130.169	128.145	400
Chr1B	265594331	265594529	Infected_peak_903	21.3279	+	2	39111	0,87	TraesCS1B03G0446700	4.92649	2.91553e-07	3.79883e-07	6.53528	6.42035	198
Chr1B	265594554	265594629	Infected_peak_904	5.67836	+	1	75	0	TraesCS1B03G0446700	0.21432	0.0191546	0.0195273	1.71773	1.70936	75
Chr1B	266122160	266122210	Infected_peak_905	12.2261	+	1	50	0	TraesCS1B03G0447500LC	6.96908	0.000200444	0.000208728	3.69801	3.68042	50
Chr1B	268584258	268584433	Infected_peak_906	84.8948	+	1	175	0	TraesCS1B03G0448900	5.16029	8.08874e-27	2.7804e-26	26.0921	25.5559	175
Chr1B	271335179	271335354	Infected_peak_907	52.1624	+	1	175	0	TraesCS1B03G0453100	4.65827	9.11731e-17	1.98406e-16	16.0401	15.7024	175
Chr1B	271335429	271335545	Infected_peak_908	23.39	+	1	116	0	TraesCS1B03G0453100	5.08568	6.68702e-08	9.09731e-08	7.17477	7.04109	116
Chr1B	271681370	271681420	Infected_peak_909	40.088	+	1	50	0	TraesCS1B03G0453200	6.31616	4.69319e-13	8.55676e-13	12.3285	12.0677	50
Chr1B	272127395	272127756	Infected_peak_910	101.705	+	2	194,71	0,290	TraesCS1B03G0453600	4.57994	5.69657e-32	2.41949e-31	31.2444	30.6163	361
Chr1B	274943760	274943810	Infected_peak_911	19.1893	+	1	50	0	TraesCS1B03G0455900	4.42247	1.34637e-06	1.6728e-06	5.87084	5.77656	50
Chr1B	276834081	276834256	Infected_peak_912	110.794	+	1	175	0	TraesCS1B03G0461100	5.3535	9.36242e-35	4.44342e-34	34.0286	33.3523	175
Chr1B	277307490	277307665	Infected_peak_913	43.5151	+	1	175	0	TraesCS1B03G0462000	4.88929	4.13347e-14	7.95522e-14	13.3837	13.0993	175
Chr1B	284241063	284241313	Infected_peak_914	88.8476	+	1	250	0	TraesCS1B03G0468100	5.39377	4.95741e-28	1.7956e-27	27.3047	26.7458	250
Chr1B	286620734	286621073	Infected_peak_915	122.986	+	1	339	0	TraesCS1B03G0473000	5.55233	1.73027e-38	9.49892e-38	37.7619	37.0223	339
Chr1B	295486572	295486822	Infected_peak_916	193.1	+	1	250	0	TraesCS1B03G0485900	4.92847	6.49439e-60	7.43214e-59	59.1875	58.1289	250
Chr1B	302887115	302887290	Infected_peak_917	49.5904	+	1	175	0	TraesCS1B03G0492700	5.25044	5.61898e-16	1.1798e-15	15.2503	14.9282	175
Chr1B	302893486	302893685	Infected_peak_918	45.5176	+	1	199	0	TraesCS1B03G0493200	4.52869	1.00143e-14	1.98529e-14	13.9994	13.7022	199
Chr1B	303484582	303484632	Infected_peak_919	14.8747	+	1	50	0	TraesCS1B03G0494100	6.88995	2.98854e-05	3.32859e-05	4.52454	4.47774	50
Chr1B	305817218	305817531	Infected_peak_920	191.735	+	2	122,65	0,248	TraesCS1B03G0496900	4.27875	1.6996e-59	1.91435e-58	58.7697	57.718	313
Chr1B	306703974	306704035	Infected_peak_921	11.4961	+	1	61	0	TraesCS1B03G0498700	5.6569	0.000337096	0.000346205	3.47225	3.46067	61
Chr1B	306943814	306943939	Infected_peak_922	19.8211	+	1	125	0	TraesCS1B03G0499000	4.3181	8.56549e-07	1.07962e-06	6.06725	5.96673	125
Chr1B	308564364	308564514	Infected_peak_923	23.8627	+	1	150	0	TraesCS1B03G0501900	4.70156	4.77383e-08	6.55543e-08	7.32113	7.1834	150
Chr1B	311491949	311492099	Infected_peak_924	77.3405	+	1	150	0	TraesCS1B03G0505900	3.95711	1.68339e-24	5.2263e-24	23.7738	23.2818	150
Chr1B	313753359	313753475	Infected_peak_925	201.263	+	1	116	0	TraesCS1B03G0509100	3.77056	2.09427e-62	2.59265e-61	61.679	60.5863	116
Chr1B	315703030	315703255	Infected_peak_926	113.37	+	1	225	0	TraesCS1B03G0512400	4.28332	1.52172e-35	7.45174e-35	34.8177	34.1277	225
Chr1B	316677599	316677849	Infected_peak_927	143.886	+	1	250	0	TraesCS1B03G0513500	4.60909	7.09991e-45	4.85206e-44	44.1487	43.3141	250
Chr1B	320881055	320881280	Infected_peak_928	66.0797	+	1	225	0	TraesCS1B03G0517600	4.17157	4.81183e-21	1.28239e-20	20.3177	19.892	225
Chr1B	328399131	328399456	Infected_peak_929	176.616	+	1	325	0	TraesCS1B03G0528400	4.32585	7.00176e-55	6.8126e-54	54.1548	53.1667	325
Chr1B	330624727	330624927	Infected_peak_930	116.351	+	1	200	0	TraesCS1B03G0532800	5.22398	1.8617e-36	9.43475e-36	35.7301	35.0253	200
Chr1B	330870981	330871156	Infected_peak_931	34.5371	+	1	175	0	TraesCS1B03G0533000	4.10423	2.41139e-11	4.01127e-11	10.6177	10.3967	175
Chr1B	331073051	331073176	Infected_peak_932	38.7051	+	1	125	0	TraesCS1B03G0533200	3.90028	1.25054e-12	2.23151e-12	11.9029	11.6514	125
Chr1B	332104030	332104230	Infected_peak_933	229.084	+	1	200	0	TraesCS1B03G0534400	6.0953	6.9031e-71	1.09324e-69	70.161	68.9613	200
Chr1B	333629825	333629940	Infected_peak_934	25.1578	+	1	115	0	TraesCS1B03G0536700	5.72918	1.89816e-08	2.67146e-08	7.72167	7.57325	115
Chr1B	333753248	333753498	Infected_peak_935	94.4122	+	1	250	0	TraesCS1B03G0536900	4.33291	9.75905e-30	3.79403e-29	29.0106	28.4209	250
Chr1B	334696363	334696488	Infected_peak_936	24.7573	+	1	125	0	TraesCS1B03G0538800	5.42005	2.52473e-08	3.52633e-08	7.59779	7.45268	125
Chr1B	335618248	335618323	Infected_peak_937	12.9857	+	1	75	0	TraesCS1B03G0541100	7.36444	0.000116593	0.000123288	3.93333	3.90908	75
Chr1B	335732894	335733094	Infected_peak_938	108.091	+	1	200	0	TraesCS1B03G0541300	4.82414	6.27902e-34	2.89392e-33	33.2021	32.5385	200
Chr1B	338504021	338504182	Infected_peak_939	48.4095	+	1	161	0	TraesCS1B03G0547800	4.5157	1.29382e-15	2.67479e-15	14.8881	14.5727	161
Chr1B	339723371	339723496	Infected_peak_940	30.91	+	1	125	0	TraesCS1B03G0549200	4.53702	3.17586e-10	4.9562e-10	9.49814	9.30485	125
Chr1B	339829590	339829827	Infected_peak_941	16.6093	+	2	37113	0,124	TraesCS1B03G0549500	8.28164	8.56782e-06	1.00023e-05	5.06713	4.9999	237
Chr1B	340464985	340465252	Infected_peak_942	14.6645	+	2	166,9	0,258	TraesCS1B03G0550200	4.61357	3.47884e-05	3.85068e-05	4.45857	4.41446	267
Chr1B	341119944	341120170	Infected_peak_943	26.5895	+	2	83,42	0,184	TraesCS1B03G0551500LC	4.6734	6.848e-09	9.90307e-09	8.16444	8.00423	226
Chr1B	342297701	342297851	Infected_peak_944	49.184	+	1	150	0	TraesCS1B03G0552200	4.46605	7.49353e-16	1.56365e-15	15.1253	14.8059	150
Chr1B	342426007	342426232	Infected_peak_945	150.541	+	1	225	0	TraesCS1B03G0552300	4.82865	6.5089e-47	4.8167e-46	46.1865	45.3173	225
Chr1B	347008394	347008519	Infected_peak_946	23.5281	+	1	125	0	TraesCS1B03G0560900	4.68801	6.06119e-08	8.2667e-08	7.21744	7.08267	125
Chr1B	347729614	347729764	Infected_peak_947	29.0417	+	1	150	0	TraesCS1B03G0562500	4.28255	1.19613e-09	1.80959e-09	8.92222	8.74242	150
Chr1B	347729864	347729976	Infected_peak_948	16.9422	+	1	112	0	TraesCS1B03G0562500	4.98469	6.74973e-06	7.94107e-06	5.17071	5.10012	112
Chr1B	348127856	348127906	Infected_peak_949	27.6238	+	1	50	0	TraesCS1B03G0563100,TraesCS1B03G0563200LC	4.88442	3.28096e-09	4.8351e-09	8.484	8.31559	50
Chr1B	348129851	348129926	Infected_peak_950	152.83	+	1	75	0	TraesCS1B03G0563100	3.52066	1.3009e-47	9.8555e-47	46.8858	46.0063	75
Chr1B	348286156	348286327	Infected_peak_951	209.526	+	1	171	0	TraesCS1B03G0563500	4.62138	6.37245e-65	8.43865e-64	64.1957	63.0737	171
Chr1B	348315985	348316085	Infected_peak_952	17.9359	+	1	100	0	TraesCS1B03G0563600	4.28263	3.31117e-06	3.98805e-06	5.48002	5.39924	100
Chr1B	348844911	348845202	Infected_peak_953	65.8637	+	1	291	0	TraesCS1B03G0564700,TraesCS1B03G0564800	4.46714	5.60901e-21	1.48951e-20	20.2511	19.827	291
Chr1B	352345278	352345478	Infected_peak_954	92.853	+	1	200	0	TraesCS1B03G0568700,TraesCS1B03G0568800	3.82096	2.929e-29	1.11803e-28	28.5333	27.9515	200
Chr1B	357581838	357581913	Infected_peak_955	26.5579	+	1	75	0	TraesCS1B03G0576300	5.15277	7.00301e-09	1.01223e-08	8.15472	7.99472	75
Chr1B	360080821	360080921	Infected_peak_956	13.8126	+	1	100	0	TraesCS1B03G0578000,TraesCS1B03G0578100	7.55822	6.42696e-05	6.95025e-05	4.19199	4.158	100
Chr1B	360356825	360356900	Infected_peak_957	35.9543	+	1	75	0	TraesCS1B03G0578200	4.11231	8.81871e-12	1.50207e-11	11.0546	10.8233	75
Chr1B	360356961	360357111	Infected_peak_958	12.8734	+	1	150	0	TraesCS1B03G0578300LC	5.93444	0.000126369	0.000133262	3.89836	3.87529	150
Chr1B	362338973	362339048	Infected_peak_959	20.2841	+	1	75	0	TraesCS1B03G0581700	4.32621	6.14754e-07	7.83195e-07	6.2113	6.10613	75
Chr1B	362343917	362343967	Infected_peak_960	27.9615	+	1	50	0	TraesCS1B03G0581700	4.06223	2.57955e-09	3.82606e-09	8.58846	8.41725	50
Chr1B	362585604	362585654	Infected_peak_961	11.2347	+	1	50	0	TraesCS1B03G0582300	4.47869	0.000404643	0.00041498	3.39293	3.38197	50
Chr1B	363556822	363556997	Infected_peak_962	109.3	+	1	175	0	TraesCS1B03G0583900	3.92503	2.67889e-34	1.25113e-33	33.572	32.9027	175
Chr1B	365321892	365322042	Infected_peak_963	60.5773	+	1	150	0	TraesCS1B03G0586300	4.30404	2.36314e-19	5.81317e-19	18.6265	18.2356	150
Chr1B	365335989	365336164	Infected_peak_964	89.7189	+	1	175	0	TraesCS1B03G0586500	4.95813	2.67758e-28	9.81579e-28	27.5723	27.0081	175
Chr1B	366021318	366021393	Infected_peak_965	19.8579	+	1	75	0	TraesCS1B03G0587600	5.21925	8.33939e-07	1.05238e-06	6.07887	5.97783	75
Chr1B	366922145	366922245	Infected_peak_966	12.3991	+	1	100	0	TraesCS1B03G0588300	7.05087	0.000177185	0.000185134	3.75157	3.73251	100
Chr1B	368715327	368715417	Infected_peak_967	46.4267	+	1	90	0	TraesCS1B03G0590400	3.83849	5.25408e-15	1.05721e-14	14.2795	13.9758	90
Chr1B	370522610	370523172	Infected_peak_968	13.1927	+	2	44,31	0,531	TraesCS1B03G0592200	7.3268	0.000100491	0.000106805	3.99787	3.97141	562
Chr1B	370611673	370611723	Infected_peak_969	17.2317	+	1	50	0	TraesCS1B03G0592400,TraesCS1B03G0592500	4.55782	5.48343e-06	6.49748e-06	5.26095	5.18726	50
Chr1B	374487714	374487889	Infected_peak_970	46.2168	+	1	175	0	TraesCS1B03G0596400	4.55911	6.09849e-15	1.22285e-14	14.2148	13.9126	175
Chr1B	375263589	375263764	Infected_peak_971	64.0063	+	1	175	0	TraesCS1B03G0597800	3.90384	2.09473e-20	5.39741e-20	19.6789	19.2678	175
Chr1B	375263864	375264039	Infected_peak_972	42.8265	+	1	175	0	TraesCS1B03G0597800	4.93281	6.73501e-14	1.28212e-13	13.1717	12.8921	175
Chr1B	376230984	376231103	Infected_peak_973	19.8003	+	1	119	0	TraesCS1B03G0599000	4.86734	8.69112e-07	1.09522e-06	6.06092	5.9605	119
Chr1B	379204407	379204457	Infected_peak_974	27.3928	+	1	50	0	TraesCS1B03G0601900	4.42541	3.86669e-09	5.67488e-09	8.41266	8.24604	50
Chr1B	384454786	384454861	Infected_peak_975	47.1159	+	1	75	0	TraesCS1B03G0609800	3.83787	3.22819e-15	6.55694e-15	14.491	14.1833	75
Chr1B	384457075	384457275	Infected_peak_976	228.885	+	1	200	0	TraesCS1B03G0609800	3.52363	7.93503e-71	1.25555e-69	70.1005	68.9012	200
Chr1B	386368245	386368320	Infected_peak_977	34.6582	+	1	75	0	TraesCS1B03G0611900LC	4.03938	2.21406e-11	3.68852e-11	10.6548	10.4331	75
Chr1B	388256074	388256124	Infected_peak_978	12.1442	+	1	50	0	TraesCS1B03G0614800,TraesCS1B03G0614900LC	5.68335	0.000212405	0.000220926	3.67284	3.65575	50
Chr1B	389090434	389090534	Infected_peak_979	61.1686	+	1	100	0	TraesCS1B03G0615800	3.92995	1.55687e-19	3.85849e-19	18.8077	18.4136	100
Chr1B	391671488	391671713	Infected_peak_980	27.5837	+	2	99,76	0,149	TraesCS1B03G0619200	5.58753	3.37517e-09	4.97148e-09	8.4717	8.30351	225
Chr1B	392181825	392181950	Infected_peak_981	81.5877	+	1	125	0	TraesCS1B03G0619600	3.75132	8.3557e-26	2.75196e-25	25.078	24.5604	125
Chr1B	392538405	392538530	Infected_peak_982	41.6868	+	1	125	0	TraesCS1B03G0620100	4.32198	1.51089e-13	2.82506e-13	12.8208	12.549	125
Chr1B	393313282	393313551	Infected_peak_983	128.455	+	1	269	0	TraesCS1B03G0621200	4.28335	3.68691e-40	2.14398e-39	39.4333	38.6688	269
Chr1B	396597856	396598056	Infected_peak_984	167.704	+	1	200	0	TraesCS1B03G0626900	4.65337	3.68217e-52	3.28071e-51	51.4339	50.484	200
Chr1B	400421009	400421234	Infected_peak_985	114.067	+	1	225	0	TraesCS1B03G0632100	4.45563	9.2981e-36	4.59605e-35	35.0316	34.3376	225
Chr1B	402374676	402374801	Infected_peak_986	57.4079	+	1	125	0	TraesCS1B03G0635300	3.61877	2.22353e-18	5.2299e-18	17.653	17.2815	125
Chr1B	402544566	402544641	Infected_peak_987	11.782	+	1	75	0	TraesCS1B03G0635600	6.79886	0.000275211	0.00028397	3.56033	3.54673	75
Chr1B	403447696	403447838	Infected_peak_988	53.4884	+	1	142	0	TraesCS1B03G0637200	5.56021	3.56709e-17	7.91387e-17	16.4477	16.1016	142
Chr1B	403461404	403461579	Infected_peak_989	113.978	+	1	175	0	TraesCS1B03G0637300	5.06585	9.90058e-36	4.8898e-35	35.0043	34.3107	175
Chr1B	407603154	407603327	Infected_peak_990	164.967	+	1	173	0	TraesCS1B03G0645300	4.56298	2.54556e-51	2.18835e-50	50.5942	49.6599	173
Chr1B	409388409	409388609	Infected_peak_991	80.109	+	1	200	0	TraesCS1B03G0649200	4.70078	2.3803e-25	7.66985e-25	24.6234	24.1152	200
Chr1B	414591128	414591453	Infected_peak_992	143.676	+	1	325	0	TraesCS1B03G0655800LC	4.15867	8.22796e-45	5.61223e-44	44.0847	43.2509	325
Chr1B	416754546	416754871	Infected_peak_993	238.309	+	1	325	0	TraesCS1B03G0659500	5.58264	1.05456e-73	1.82722e-72	72.9769	71.7382	325
Chr1B	417922732	417922892	Infected_peak_994	17.8341	+	1	160	0	TraesCS1B03G0660400,TraesCS1B03G0660500	5.44609	3.56439e-06	4.27948e-06	5.44801	5.36861	160
Chr1B	418799872	418800072	Infected_peak_995	78.6431	+	1	200	0	TraesCS1B03G0661400LC	5.38239	6.71277e-25	2.11867e-24	24.1731	23.6739	200
Chr1B	418800147	418800197	Infected_peak_996	15.7392	+	1	50	0	TraesCS1B03G0661400LC	4.53231	1.6031e-05	1.82825e-05	4.79504	4.73796	50
Chr1B	421038924	421039124	Infected_peak_997	78.4759	+	1	200	0	TraesCS1B03G0664100	6.56164	7.55372e-25	2.37905e-24	24.1218	23.6236	200
Chr1B	421150588	421150784	Infected_peak_998	61.1468	+	1	196	0	TraesCS1B03G0664400	4.18781	1.58086e-19	3.91732e-19	18.8011	18.407	196
Chr1B	422759025	422759100	Infected_peak_999	24.6596	+	1	75	0	TraesCS1B03G0666600	4.20727	2.70674e-08	3.77318e-08	7.56755	7.42329	75
Chr1B	423203054	423203229	Infected_peak_1000	50.7494	+	1	175	0	TraesCS1B03G0667100	4.18683	2.47869e-16	5.2833e-16	15.6058	15.2771	175
Chr1B	424745625	424745750	Infected_peak_1001	22.5435	+	1	125	0	TraesCS1B03G0669100	5.25499	1.22409e-07	1.63578e-07	6.91219	6.78627	125
Chr1B	425130942	425131202	Infected_peak_1002	130.339	+	2	18124	0,136	TraesCS1B03G0669400	4.05537	9.77681e-41	5.80821e-40	40.0098	39.236	260
Chr1B	426268497	426268771	Infected_peak_1003	196.376	+	1	274	0	TraesCS1B03G0671400	5.02968	6.47453e-61	7.67492e-60	60.1888	59.1149	274
Chr1B	426997115	426997230	Infected_peak_1004	39.1101	+	1	115	0	TraesCS1B03G0672700	4.55119	9.37766e-13	1.68534e-12	12.0279	11.7733	115
Chr1B	427321765	427321840	Infected_peak_1005	13.905	+	1	75	0	TraesCS1B03G0673500	4.61326	6.00491e-05	6.5191e-05	4.22149	4.18581	75
[truncated: 16,860 more rows]

## Sheet: Table S19. CK peak annotation
Supplementary Table S19. CK sample peak related gene annotation of MeRIP-seq
[truncated: 16,287 more rows]

[truncated: 10 more sheets: Table S20. Infect. peak annot., Table S21. Peak numberMeRIPseq, Table S22.Infected sample motif, Table S23. MeRIPseq all annot., Table S24. DMPs peak annot, Table S25. DMPs GO BP, Table S26. DMPs GO CC, Table S27. DMPs GO MF, Table S28.DMPs Level2 GO, Table S29. DMPs KEGG ]
