# Supplementary material for: Transcriptome-Wide N6-Methyladenosine (m6A) Methylation Analyses in a Compatible Wheat–Puccinia striiformis f. sp. tritici Interaction
Source: Plants (Basel). 2024 Mar 29;13(7):982. doi: 10.3390/plants13070982 (PMC11013425; doi:10.3390/plants13070982)
Supplement: Supplementary file 1 [file plants-13-00982-s001.zip › Supplementary Tables S30-S31 RNA-seq+MeRIP-seq.xlsx]

## Sheet: Table S30. Joint FC of IP&In
Supplementary Table S30. Joint statistics on fold changes of m6A modified peaks related genes and transcripts in infected leaves in comparison to CK
peak ID	Gene ID	IP_log2(FC)	In_log2(FC)	p-value	FDR
MergePeak_1	TraesCS1A03G0003900LC	-1.2773	0	1	1
MergePeak_1	TraesCS1A03G0004000	-1.2773	-0.645106	1.00786e-05	0.000309975
MergePeak_2	TraesCS1A03G0004300	1.21059	0.0173462	0.383166	0.966504
MergePeak_3	TraesCS1A03G0004500	0.794364	0.709739	0.431479	0.966504
MergePeak_4	TraesCS1A03G0004500	0.569838	0.709739	0.431479	0.966504
MergePeak_5	TraesCS1A03G0004900	1.19251	0.690371	0.48539	0.966504
MergePeak_6	TraesCS1A03G0005200	-0.509034	1.74073	1.16594e-07	5.9213e-06
MergePeak_7	TraesCS1A03G0005600	-0.260356	0.726835	0.329447	0.966504
MergePeak_8	TraesCS1A03G0005600	-0.385999	0.726835	0.329447	0.966504
MergePeak_9	TraesCS1A03G0016000	1.16439	0.471623	0.940702	0.996296
MergePeak_10	TraesCS1A03G0016400	0.169458	1.17482	0.0118162	0.122225
MergePeak_11	TraesCS1A03G0016400	0.940423	1.17482	0.0118162	0.122225
MergePeak_12	TraesCS1A03G0020600	-0.615996	-0.392651	0.00012784	0.00285409
MergePeak_13	TraesCS1A03G0031500	-0.0541297	0.380656	0.781165	0.966504
MergePeak_14	TraesCS1A03G0033800	0.290401	0.430598	0.946112	0.996296
MergePeak_15	TraesCS1A03G0033900	-0.231223	0.810909	0.146106	0.687802
MergePeak_16	TraesCS1A03G0036900	-0.214018	-0.999694	9.91397e-05	0.00229467
MergePeak_17	TraesCS1A03G0037000	2.49956	0.0559592	0.112929	0.595972
MergePeak_18	TraesCS1A03G0037000	-0.193594	0.0559592	0.112929	0.595972
MergePeak_19	TraesCS1A03G0039500	-0.441026	1.3944	0.00202661	0.0293812
MergePeak_20	TraesCS1A03G0043500	-1.04216	0.297615	0.750908	0.966504
MergePeak_21	TraesCS1A03G0043600	-0.150513	0.497534	0.942194	0.996296
MergePeak_22	TraesCS1A03G0053400	-0.506167	0.213407	0.616983	0.966504
MergePeak_23	TraesCS1A03G0055300LC	0.297844	0.925273	0.0493053	0.350454
MergePeak_24	TraesCS1A03G0056600	-0.539291	-0.171721	0.0304722	0.249193
MergePeak_25	TraesCS1A03G0056600	0.397207	-0.171721	0.0304722	0.249193
MergePeak_26	TraesCS1A03G0057600	0.62855	0.539931	0.753036	0.966504
MergePeak_27	TraesCS1A03G0058100	-2.24056	0.816351	0.033627	0.26768
MergePeak_28	TraesCS1A03G0058100	-0.713729	0.816351	0.033627	0.26768
MergePeak_28	TraesCS1A03G0058200LC	-0.713729	0.252224	0.690307	0.966504
MergePeak_29	TraesCS1A03G0059400	2.73005	1.65143	4.54493e-07	1.99763e-05
MergePeak_30	TraesCS1A03G0061000	1.19449	0.649468	0.18839	0.78264
MergePeak_31	TraesCS1A03G0065800LC	-1.76881	0	1	1
MergePeak_31	TraesCS1A03G0065900	-1.76881	0.101074	0.825006	0.972861
MergePeak_32	TraesCS1A03G0066600	2.74819	1.91425	5.48383e-07	2.35586e-05
MergePeak_33	TraesCS1A03G0068100	-0.664826	-1.76489	3.80875e-12	5.00629e-10
MergePeak_34	TraesCS1A03G0069000	0.583473	0.495124	0.677224	0.966504
MergePeak_35	TraesCS1A03G0081100LC	0.357249	1.30183	0.00837871	0.0933143
MergePeak_35	TraesCS1A03G0081200	0.357249	-0.0631705	0.815483	0.970106
MergePeak_36	TraesCS1A03G0083300	0.414935	0.648197	0.595027	0.966504
MergePeak_37	TraesCS1A03G0083300	-0.466661	0.648197	0.595027	0.966504
MergePeak_38	TraesCS1A03G0084400	-1.71566	0.435409	0.946695	0.996296
MergePeak_39	TraesCS1A03G0093500	-0.682652	0.686278	0.365253	0.966504
MergePeak_40	TraesCS1A03G0094000	0.230863	0.383802	0.796635	0.966504
MergePeak_41	TraesCS1A03G0096400	2.21026	0.216659	0.590835	0.966504
MergePeak_41	TraesCS1A03G0096500LC	2.21026	0.157167	0.969633	0.996296
MergePeak_42	TraesCS1A03G0096600	-0.590831	-0.460248	0.141447	0.675076
MergePeak_43	TraesCS1A03G0096700	0.0816137	0.0402703	0.0348297	0.274462
MergePeak_44	TraesCS1A03G0101600	1.43071	0.502872	0.909115	0.990213
MergePeak_45	TraesCS1A03G0103400	0.589846	0.487983	0.969665	0.996296
MergePeak_46	TraesCS1A03G0105900	0.376147	0.733204	0.385822	0.966504
MergePeak_47	TraesCS1A03G0107200	0.0119344	0.541985	0.774509	0.966504
MergePeak_48	TraesCS1A03G0108500	-0.124854	0.429458	0.802161	0.967393
MergePeak_49	TraesCS1A03G0109100	0.926488	0.110677	0.180231	0.765091
MergePeak_50	TraesCS1A03G0110900	0.189874	0.156184	0.82719	0.972861
MergePeak_51	TraesCS1A03G0114700	-1.01751	0.573676	0.628206	0.966504
MergePeak_52	TraesCS1A03G0115300LC	0.348059	-0.0461418	0.769755	0.966504
MergePeak_53	TraesCS1A03G0117100	1.85425	1.6804	0.00270583	0.0372889
MergePeak_54	TraesCS1A03G0121700	3.35858	0.750993	0.36695	0.966504
MergePeak_55	TraesCS1A03G0127800	0.455615	0.249036	0.539527	0.966504
MergePeak_56	TraesCS1A03G0128600	-0.337726	0.908373	0.0900704	0.520133
MergePeak_57	TraesCS1A03G0130600LC	-0.281346	-0.0289911	0.103863	0.567447
MergePeak_58	TraesCS1A03G0135500	-0.506662	0.153031	0.389206	0.966504
MergePeak_59	TraesCS1A03G0136200	-0.454233	-0.296846	0.00307561	0.0413336
MergePeak_60	TraesCS1A03G0138200	-1.40132	0.631919	0.584275	0.966504
MergePeak_61	TraesCS1A03G0139500	-2.94418	-2.26363	5.07661e-05	0.00129185
MergePeak_62	TraesCS1A03G0143700LC	1.28938	0.224999	0.425368	0.966504
MergePeak_63	TraesCS1A03G0147100	-1.47809	-0.0984978	0.131288	0.648546
MergePeak_64	TraesCS1A03G0150700	-0.0176205	1.64542	0.000481173	0.00888214
MergePeak_65	TraesCS1A03G0150700	-0.226919	1.64542	0.000481173	0.00888214
MergePeak_66	TraesCS1A03G0160100	0.691757	1.34346	0.00144837	0.022319
MergePeak_67	TraesCS1A03G0162100	-0.275407	0.673643	0.356736	0.966504
MergePeak_68	TraesCS1A03G0163200	-2.70673	0.436789	0.934244	0.996296
MergePeak_69	TraesCS1A03G0164000	-0.36534	-0.380975	0.00272882	0.0375258
MergePeak_69	TraesCS1A03G0164200LC	-0.36534	-0.302998	0.560613	0.966504
MergePeak_69	TraesCS1A03G0164300	-0.36534	0.0350698	0.0203755	0.184479
MergePeak_70	TraesCS1A03G0164500	0.44617	1.26448	0.000718993	0.0125238
MergePeak_71	TraesCS1A03G0164500	0.957847	1.26448	0.000718993	0.0125238
MergePeak_72	TraesCS1A03G0170500	0.589254	0.831201	0.254926	0.896589
MergePeak_73	TraesCS1A03G0172300	0.229417	0.456314	0.816597	0.970478
MergePeak_74	TraesCS1A03G0172900LC	4.00684	0.217662	0.934035	0.996296
MergePeak_74	TraesCS1A03G0173100LC	4.00684	-0.0735087	0.277748	0.922914
MergePeak_75	TraesCS1A03G0174000	0.017163	-0.0816989	0.3055	0.956885
MergePeak_76	TraesCS1A03G0174700	2.60275	0.256297	0.812993	0.968983
MergePeak_77	TraesCS1A03G0174800	0.817705	0.744207	0.25625	0.898846
MergePeak_78	TraesCS1A03G0175300	1.41213	0.0776076	0.105333	0.572865
MergePeak_79	TraesCS1A03G0175300	-0.406708	0.0776076	0.105333	0.572865
MergePeak_80	TraesCS1A03G0175300	0.170036	0.0776076	0.105333	0.572865
MergePeak_81	TraesCS1A03G0178400	-0.317871	-0.154216	0.0685278	0.437492
MergePeak_82	TraesCS1A03G0179100	0.36482	0.918992	0.121334	0.620841
MergePeak_83	TraesCS1A03G0180300	-0.26782	0.387791	0.774337	0.966504
MergePeak_84	TraesCS1A03G0181600	0.934399	-0.779591	0.000138698	0.00305502
MergePeak_85	TraesCS1A03G0182400	0.0420586	0.200632	0.665703	0.966504
MergePeak_86	TraesCS1A03G0185800	0.0656963	0.514743	0.730531	0.966504
MergePeak_87	TraesCS1A03G0186000	1.13203	1.0092	0.108385	0.581835
MergePeak_88	TraesCS1A03G0188200	-0.734933	0.0350542	0.0404381	0.30498
MergePeak_89	TraesCS1A03G0189800	-1.21761	0.444934	0.917166	0.993172
MergePeak_90	TraesCS1A03G0192800	0.221575	0.17646	0.618271	0.966504
MergePeak_91	TraesCS1A03G0193000	2.28364	2.12622	7.44608e-12	9.33203e-10
MergePeak_92	TraesCS1A03G0193900	0.530923	1.11465	0.00571765	0.0688303
MergePeak_93	TraesCS1A03G0195000	-2.77679	0.465619	0.84927	0.976999
MergePeak_94	TraesCS1A03G0195200	0.573593	0.866457	0.186506	0.777826
MergePeak_95	TraesCS1A03G0195700	0.720057	0.42082	0.716433	0.966504
MergePeak_96	TraesCS1A03G0197600	-0.696662	0.222704	0.279799	0.923624
MergePeak_97	TraesCS1A03G0197700	1.7159	-0.231141	0.00126792	0.0200151
MergePeak_98	TraesCS1A03G0200200	0.691024	1.06387	0.00830895	0.0927291
MergePeak_99	TraesCS1A03G0200300	-0.963449	-0.909809	0.0164185	0.157036
MergePeak_100	TraesCS1A03G0200400	-1.68501	0.417355	0.737149	0.966504
MergePeak_101	TraesCS1A03G0200700	0.862357	1.10764	0.00988031	0.10628
MergePeak_102	TraesCS1A03G0200900	-0.260453	0.346483	0.744064	0.966504
MergePeak_103	TraesCS1A03G0202700	0.0399637	0.731418	0.385811	0.966504
MergePeak_104	TraesCS1A03G0204800	0.471067	0.0306989	0.450091	0.966504
MergePeak_105	TraesCS1A03G0207600	0.32094	1.04885	0.0128732	0.130732
MergePeak_106	TraesCS1A03G0209800	1.66851	0.767806	0.245384	0.883138
MergePeak_107	TraesCS1A03G0209900	-0.71265	-0.779756	1.16651e-07	5.9213e-06
MergePeak_108	TraesCS1A03G0210300	-0.820636	0.315668	0.474161	0.966504
MergePeak_109	TraesCS1A03G0210400	0.927395	-0.0407517	0.0715819	0.449927
MergePeak_110	TraesCS1A03G0210700	0.0941979	0.737429	0.300593	0.953848
MergePeak_111	TraesCS1A03G0213700	-0.270238	0.517354	0.815359	0.970058
MergePeak_112	TraesCS1A03G0213700	-0.312618	0.517354	0.815359	0.970058
MergePeak_113	TraesCS1A03G0214000	0.376313	0.531243	0.882527	0.983326
MergePeak_114	TraesCS1A03G0214200	-0.264979	0.291013	0.847708	0.976999
MergePeak_115	TraesCS1A03G0215400	1.0026	0.702065	0.400261	0.966504
MergePeak_116	TraesCS1A03G0217500	0.405395	0.67708	0.434136	0.966504
MergePeak_117	TraesCS1A03G0218100	-0.165754	0.758073	0.231279	0.860745
MergePeak_118	TraesCS1A03G0218200	0.0770798	0.763274	0.361051	0.966504
MergePeak_119	TraesCS1A03G0218400	0.745519	0.269093	0.448498	0.966504
MergePeak_120	TraesCS1A03G0218600	-0.629411	0.215201	0.765682	0.966504
MergePeak_121	TraesCS1A03G0220900	2.59645	0.470599	0.952912	0.996296
MergePeak_122	TraesCS1A03G0220900	3.00712	0.470599	0.952912	0.996296
MergePeak_123	TraesCS1A03G0220900	-0.47494	0.470599	0.952912	0.996296
MergePeak_124	TraesCS1A03G0221900	0.140797	0.331381	0.948171	0.996296
MergePeak_125	TraesCS1A03G0224100	-1.37653	0.182811	0.122943	0.62554
MergePeak_126	TraesCS1A03G0224100	0.0285163	0.182811	0.122943	0.62554
MergePeak_127	TraesCS1A03G0224200LC	-0.832357	0.164896	0.404142	0.966504
MergePeak_128	TraesCS1A03G0227100	1.23094	0.886202	0.102922	0.563991
MergePeak_129	TraesCS1A03G0227400	2.54953	0.784158	0.231273	0.860745
MergePeak_130	TraesCS1A03G0230500	-0.573452	0.338222	0.41754	0.966504
MergePeak_131	TraesCS1A03G0230800	1.06175	0.695507	0.179686	0.763914
MergePeak_131	TraesCS1A03G0230900	1.06175	0	1	1
MergePeak_132	TraesCS1A03G0231200	-0.342693	1.05648	0.034702	0.273778
MergePeak_133	TraesCS1A03G0232100	0.181827	0.295995	0.577813	0.966504
MergePeak_134	TraesCS1A03G0232200	0.0672782	-0.115164	0.159333	0.71918
MergePeak_135	TraesCS1A03G0233400	-1.89924	-1.15427	2.83981e-09	2.06038e-07
MergePeak_136	TraesCS1A03G0233600	0.245845	0.83744	0.208575	0.822538
MergePeak_137	TraesCS1A03G0233900	0.100613	0.690442	0.449233	0.966504
MergePeak_138	TraesCS1A03G0234400	2.56264	0.823256	0.253358	0.893991
MergePeak_139	TraesCS1A03G0234500	-0.881584	-0.405983	0.0128841	0.130829
MergePeak_140	TraesCS1A03G0241000	-0.542164	0.89139	0.0746508	0.463096
MergePeak_141	TraesCS1A03G0241600	3.22335	1.35972	0.00212307	0.0305467
MergePeak_142	TraesCS1A03G0242100	-0.171678	0.247514	0.42489	0.966504
MergePeak_143	TraesCS1A03G0244400	-0.185935	-0.714282	0.000345186	0.0066902
MergePeak_144	TraesCS1A03G0245600	-0.42554	-0.276344	0.0354706	0.278134
MergePeak_145	TraesCS1A03G0247700	-0.0166402	0.736366	0.36215	0.966504
MergePeak_146	TraesCS1A03G0248900	2.80242	0.390176	0.830265	0.972861
MergePeak_147	TraesCS1A03G0255000	-1.61255	-1.32093	1.66257e-07	8.0921e-06
MergePeak_148	TraesCS1A03G0255300	0.401157	0.563052	0.788756	0.966504
MergePeak_149	TraesCS1A03G0255900	1.86059	0.802681	0.190596	0.786951
MergePeak_150	TraesCS1A03G0256500	0.291993	0.521735	0.931198	0.996296
MergePeak_151	TraesCS1A03G0256600	-0.181435	0.639177	0.545113	0.966504
MergePeak_152	TraesCS1A03G0257200	0.220531	0.843189	0.138693	0.667912
MergePeak_153	TraesCS1A03G0258300	0.860938	0.432176	0.683667	0.966504
MergePeak_154	TraesCS1A03G0258400LC	0.148755	0.775636	0.386759	0.966504
MergePeak_155	TraesCS1A03G0259500	0.272975	0.134639	0.156138	0.711506
MergePeak_156	TraesCS1A03G0259500	-0.61256	0.134639	0.156138	0.711506
MergePeak_157	TraesCS1A03G0260200	-0.301891	0.50076	0.967935	0.996296
MergePeak_158	TraesCS1A03G0260600	0.384503	0.688644	0.504445	0.966504
MergePeak_159	TraesCS1A03G0260700	1.98035	-0.210513	0.343672	0.966504
MergePeak_160	TraesCS1A03G0261400	0.795616	0.554889	0.760259	0.966504
MergePeak_161	TraesCS1A03G0264500	0.259698	0.737165	0.335307	0.966504
MergePeak_162	TraesCS1A03G0266600	-0.206243	0.477737	0.951606	0.996296
MergePeak_163	TraesCS1A03G0268100	1.70536	0.761786	0.334135	0.966504
MergePeak_164	TraesCS1A03G0271800	0.0545516	0.589744	0.704564	0.966504
MergePeak_165	TraesCS1A03G0271800	1.9399	0.589744	0.704564	0.966504
MergePeak_166	TraesCS1A03G0272100	-0.031485	0.512276	0.839816	0.975541
MergePeak_166	TraesCS1A03G0272200	-0.031485	0.923321	0.140122	0.671761
MergePeak_167	TraesCS1A03G0273200	-0.150807	0.309139	0.606162	0.966504
MergePeak_168	TraesCS1A03G0273500	0.0253054	0.0105321	0.385215	0.966504
MergePeak_169	TraesCS1A03G0277400	-1.26258	0.576298	0.451956	0.966504
MergePeak_170	TraesCS1A03G0280800	-0.199711	-0.129728	0.00907593	0.0994804
MergePeak_171	TraesCS1A03G0280900	0.236956	0.545421	0.838045	0.974768
MergePeak_172	TraesCS1A03G0282800	-0.265931	0.0706887	0.538855	0.966504
MergePeak_173	TraesCS1A03G0286700	-0.0484604	-0.096737	0.00934556	0.101936
MergePeak_174	TraesCS1A03G0290300	-1.08653	0.318319	0.575888	0.966504
MergePeak_175	TraesCS1A03G0290300	-0.200852	0.318319	0.575888	0.966504
MergePeak_176	TraesCS1A03G0290600LC	0.260211	0.095319	0.909534	0.990213
MergePeak_177	TraesCS1A03G0291600	-0.00503368	0.927776	0.081297	0.490005
MergePeak_178	TraesCS1A03G0293900	0.215688	0.282895	0.299743	0.953848
MergePeak_179	TraesCS1A03G0293900	-1.44367	0.282895	0.299743	0.953848
MergePeak_180	TraesCS1A03G0295400	-0.0552841	0.283393	0.980868	0.996296
MergePeak_181	TraesCS1A03G0295500	-0.553461	0.315285	0.740936	0.966504
MergePeak_182	TraesCS1A03G0295500	0.112418	0.315285	0.740936	0.966504
MergePeak_183	TraesCS1A03G0296700	0.662957	0.736283	0.439909	0.966504
MergePeak_184	TraesCS1A03G0297300	-0.688895	0.595643	0.669449	0.966504
MergePeak_185	TraesCS1A03G0298500	0.468245	0.49423	0.91845	0.99345
MergePeak_186	TraesCS1A03G0299700	-0.14225	0.836597	0.198273	0.802081
MergePeak_187	TraesCS1A03G0300000LC	0.617063	0.401049	0.653878	0.966504
MergePeak_187	TraesCS1A03G0300100	0.617063	0.694403	0.395653	0.966504
MergePeak_188	TraesCS1A03G0300000LC	0.128515	0.401049	0.653878	0.966504
MergePeak_188	TraesCS1A03G0300200	0.128515	-0.00192982	0.0252292	0.216694
MergePeak_189	TraesCS1A03G0300800	0.0967234	1.09457	0.012533	0.128069
MergePeak_190	TraesCS1A03G0303800	2.25486	1.0375	0.021916	0.195363
MergePeak_191	TraesCS1A03G0303800	1.38872	1.0375	0.021916	0.195363
MergePeak_192	TraesCS1A03G0304700	1.59182	1.09386	0.0313014	0.254174
MergePeak_193	TraesCS1A03G0307800	2.36432	0.736407	0.265011	0.90957
MergePeak_194	TraesCS1A03G0309000	0.62564	-0.366081	0.0187923	0.173613
MergePeak_195	TraesCS1A03G0309200LC	1.71617	0.238787	0.793237	0.966504
MergePeak_196	TraesCS1A03G0309300	1.7032	1.3638	0.000472631	0.00875112
MergePeak_197	TraesCS1A03G0310500	0.834977	0.396701	0.706375	0.966504
MergePeak_198	TraesCS1A03G0310800	1.05756	0.683557	0.530516	0.966504
MergePeak_199	TraesCS1A03G0311400	0.274789	0.0725967	0.155445	0.70991
MergePeak_200	TraesCS1A03G0316400	0.221407	0.773097	0.316944	0.966504
MergePeak_201	TraesCS1A03G0317300	1.21965	0.370366	0.858707	0.976999
MergePeak_202	TraesCS1A03G0321300	0.0438237	0.496406	0.962239	0.996296
MergePeak_203	TraesCS1A03G0325400	1.021	1.30344	0.00219718	0.0313943
MergePeak_204	TraesCS1A03G0329700	1.23622	0.67489	0.4197	0.966504
MergePeak_205	TraesCS1A03G0330400	-0.348471	0.0447782	0.203439	0.812331
MergePeak_206	TraesCS1A03G0330800	-0.173186	0.615692	0.540279	0.966504
MergePeak_207	TraesCS1A03G0331200	0.090893	0.570033	0.746246	0.966504
MergePeak_208	TraesCS1A03G0331900	0.870444	0.604167	0.667472	0.966504
MergePeak_209	TraesCS1A03G0332500	0.578483	0.826654	0.224123	0.849133
MergePeak_210	TraesCS1A03G0333400	-0.280439	0.347517	0.735177	0.966504
MergePeak_211	TraesCS1A03G0337200	2.08109	0.795943	0.154857	0.70838
MergePeak_212	TraesCS1A03G0337200	0.186511	0.795943	0.154857	0.70838
MergePeak_213	TraesCS1A03G0339400	0.257455	0.572517	0.762073	0.966504
MergePeak_214	TraesCS1A03G0339400	0.0104828	0.572517	0.762073	0.966504
MergePeak_215	TraesCS1A03G0341000	0.664772	0.837501	0.0654893	0.424818
MergePeak_216	TraesCS1A03G0341100	-0.164062	-0.0971756	0.0243827	0.211445
MergePeak_217	TraesCS1A03G0342100	-0.149488	1.05981	0.0239002	0.208378
MergePeak_218	TraesCS1A03G0347000	-0.0642555	0.205509	0.482538	0.966504
MergePeak_219	TraesCS1A03G0347000	-0.0452219	0.205509	0.482538	0.966504
MergePeak_220	TraesCS1A03G0347400	0.863876	0.576844	0.640402	0.966504
MergePeak_221	TraesCS1A03G0348000LC	-0.58617	0.0304599	0.381872	0.966504
MergePeak_222	TraesCS1A03G0349500	-1.77181	0.10103	0.881826	0.983326
MergePeak_223	TraesCS1A03G0350800	-0.999211	0.91078	0.0714397	0.449354
MergePeak_224	TraesCS1A03G0352100	-0.666135	-0.0999768	0.044671	0.326555
MergePeak_225	TraesCS1A03G0352600	-0.300288	-0.230948	0.00373696	0.0485665
MergePeak_226	TraesCS1A03G0353900	0.506577	0.834634	0.236956	0.871281
MergePeak_227	TraesCS1A03G0357800	-0.186495	0.851052	0.193219	0.791837
MergePeak_228	TraesCS1A03G0359000	0.757458	1.04286	0.0147605	0.144775
MergePeak_229	TraesCS1A03G0359500	-0.747349	-0.0175509	0.167057	0.735713
MergePeak_230	TraesCS1A03G0360600	0.474687	0.736358	0.105277	0.572697
MergePeak_231	TraesCS1A03G0362200	-0.190103	0.335891	0.613069	0.966504
MergePeak_232	TraesCS1A03G0362200	3.19571	0.335891	0.613069	0.966504
MergePeak_232	TraesCS1A03G0362300LC	3.19571	0.186849	0.631919	0.966504
MergePeak_232	TraesCS1A03G0362400LC	3.19571	0.422233	0.248386	0.886119
MergePeak_233	TraesCS1A03G0363800	-0.195078	0.672485	0.517382	0.966504
MergePeak_234	TraesCS1A03G0364800	-0.0573287	0.581491	0.615191	0.966504
MergePeak_235	TraesCS1A03G0365600	0.80459	0.940032	0.0889325	0.515618
MergePeak_236	TraesCS1A03G0366300	0.264438	0.750291	0.525913	0.966504
MergePeak_237	TraesCS1A03G0367900	-0.0244361	0.616774	0.665143	0.966504
MergePeak_238	TraesCS1A03G0369700	0.338122	0.466972	0.974671	0.996296
MergePeak_239	TraesCS1A03G0370000	-0.86624	0.606807	0.646236	0.966504
MergePeak_240	TraesCS1A03G0370700	0.158249	0.417878	0.660695	0.966504
MergePeak_241	TraesCS1A03G0371000	0.152251	0.390084	0.693757	0.966504
MergePeak_242	TraesCS1A03G0371500	0.321212	0.746464	0.322628	0.966504
MergePeak_243	TraesCS1A03G0371500	-0.586635	0.746464	0.322628	0.966504
MergePeak_244	TraesCS1A03G0371800	0.951535	1.02416	0.0254674	0.218298
MergePeak_245	TraesCS1A03G0372800	-0.476239	0.472362	0.79977	0.967066
MergePeak_246	TraesCS1A03G0377200	0.77327	0.488186	0.516667	0.966504
MergePeak_247	TraesCS1A03G0381000	-0.107596	0.689139	0.372247	0.966504
MergePeak_248	TraesCS1A03G0381500	0.123227	-0.0429228	0.244148	0.881015
MergePeak_249	TraesCS1A03G0382100	0.589994	0.417966	0.916167	0.992787
MergePeak_250	TraesCS1A03G0384700	-0.328169	0.815318	0.129787	0.644508
MergePeak_251	TraesCS1A03G0386900	0.328157	0	1	1
MergePeak_251	TraesCS1A03G0387000	0.328157	0.722454	0.449957	0.966504
MergePeak_252	TraesCS1A03G0387200	-0.549283	0.737364	0.123105	0.626008
MergePeak_253	TraesCS1A03G0391400	1.72842	0.994185	0.0318446	0.257428
MergePeak_254	TraesCS1A03G0392000	-0.0643199	0.545762	0.516975	0.966504
MergePeak_255	TraesCS1A03G0393100	1.66517	2.99974	5.93925e-21	2.49407e-18
MergePeak_256	TraesCS1A03G0393700	0.553609	0.622465	0.517866	0.966504
MergePeak_257	TraesCS1A03G0393700	1.09343	0.622465	0.517866	0.966504
MergePeak_258	TraesCS1A03G0394600	0.19281	-0.0383782	0.0572046	0.388067
MergePeak_259	TraesCS1A03G0395900	-0.106688	-0.187853	0.00644535	0.0757665
MergePeak_260	TraesCS1A03G0396400	1.36116	0.898119	0.138125	0.667595
MergePeak_261	TraesCS1A03G0397200	2.39931	-0.30415	0.133009	0.652957
MergePeak_262	TraesCS1A03G0398900	-0.121084	0.539184	0.814989	0.969829
MergePeak_263	TraesCS1A03G0402000	4.50406	1.04682	0.0521516	0.364764
MergePeak_264	TraesCS1A03G0402100	1.06625	0.418523	0.776778	0.966504
MergePeak_265	TraesCS1A03G0403400	0.901505	0.854684	0.105501	0.573304
MergePeak_266	TraesCS1A03G0404500	-1.25758	1.08761	0.144428	0.682983
MergePeak_267	TraesCS1A03G0405700	0.131957	0.330794	0.662161	0.966504
MergePeak_268	TraesCS1A03G0407700	0.119061	0.331429	0.784544	0.966504
MergePeak_269	TraesCS1A03G0408100	-0.138394	0.418977	0.956566	0.996296
MergePeak_270	TraesCS1A03G0409400	0.543875	1.19372	0.00224753	0.031949
MergePeak_271	TraesCS1A03G0411300	2.89685	2.41162	1.78119e-12	2.49686e-10
MergePeak_272	TraesCS1A03G0411300	2.48608	2.41162	1.78119e-12	2.49686e-10
MergePeak_273	TraesCS1A03G0412000	-0.00538374	0.493745	0.95749	0.996296
MergePeak_274	TraesCS1A03G0412400	0.285044	0.318122	0.506468	0.966504
MergePeak_275	TraesCS1A03G0412400	-0.456663	0.318122	0.506468	0.966504
MergePeak_276	TraesCS1A03G0413200	0.517992	0.542118	0.830391	0.972861
MergePeak_277	TraesCS1A03G0413800	-0.10353	0.4584	0.882771	0.983326
MergePeak_278	TraesCS1A03G0413900	0.934242	0.633887	0.464437	0.966504
MergePeak_279	TraesCS1A03G0414800	0.33301	0.811203	0.14287	0.678654
MergePeak_280	TraesCS1A03G0419300	-0.703457	-0.291753	0.00764933	0.0869991
MergePeak_281	TraesCS1A03G0419500	0.181461	0.123711	0.254466	0.895753
MergePeak_282	TraesCS1A03G0419600	0.34221	1.38695	0.00234564	0.0331299
MergePeak_283	TraesCS1A03G0425300	-0.600329	0.0267817	0.125514	0.633479
MergePeak_284	TraesCS1A03G0425600	0.645916	0.217513	0.883309	0.983326
MergePeak_285	TraesCS1A03G0426600	-1.41901	-0.0132779	0.0808127	0.488042
MergePeak_286	TraesCS1A03G0426800LC	-1.66655	0.555238	0.148609	0.694332
MergePeak_287	TraesCS1A03G0426800LC	0.2495	0.555238	0.148609	0.694332
MergePeak_288	TraesCS1A03G0427700LC	-0.515059	0	1	1
MergePeak_288	TraesCS1A03G0427800	-0.515059	0.022033	0.143931	0.681652
MergePeak_289	TraesCS1A03G0427900	-0.228105	-0.335425	0.000597643	0.0107042
MergePeak_290	TraesCS1A03G0428100	0.471631	0.679076	0.46011	0.966504
MergePeak_291	TraesCS1A03G0428800	0.786195	0.801377	0.199246	0.804181
MergePeak_292	TraesCS1A03G0429000	1.07798	0.470597	0.958711	0.996296
MergePeak_293	TraesCS1A03G0429500	-0.335954	-0.149236	0.0134463	0.135036
MergePeak_294	TraesCS1A03G0429500	-0.490983	-0.149236	0.0134463	0.135036
MergePeak_295	TraesCS1A03G0433600	0.442072	0.478673	0.858836	0.976999
MergePeak_296	TraesCS1A03G0434100	-2.90708	-0.123959	0.00752184	0.0858208
MergePeak_297	TraesCS1A03G0434100	-0.370955	-0.123959	0.00752184	0.0858208
MergePeak_298	TraesCS1A03G0435600	-0.413772	-0.296527	0.0259073	0.221205
MergePeak_299	TraesCS1A03G0435700	0.415791	-0.0581884	0.0900985	0.52016
MergePeak_300	TraesCS1A03G0438300	0.0867042	0.395431	0.99134	0.996967
MergePeak_301	TraesCS1A03G0438500	2.22478	0.411632	0.852175	0.976999
MergePeak_302	TraesCS1A03G0438500	2.51425	0.411632	0.852175	0.976999
MergePeak_303	TraesCS1A03G0439700	-0.218002	0.499221	0.912909	0.991467
MergePeak_304	TraesCS1A03G0441900	3.33576	0.278372	0.649769	0.966504
MergePeak_305	TraesCS1A03G0442400	-0.321865	0.700896	0.142443	0.677961
MergePeak_306	TraesCS1A03G0443600LC	-0.371023	1.39615	0.0114062	0.11905
MergePeak_307	TraesCS1A03G0444200LC	1.56324	0.302025	0.528519	0.966504
MergePeak_308	TraesCS1A03G0444900	0.254548	0.0907951	0.218445	0.839109
MergePeak_309	TraesCS1A03G0445000	-0.242882	0.852406	0.108474	0.582217
MergePeak_310	TraesCS1A03G0445800	-2.90604	0.424221	0.912206	0.991036
MergePeak_311	TraesCS1A03G0448800	0.391898	0.229584	0.562757	0.966504
MergePeak_312	TraesCS1A03G0449900	-2.14112	-1.47357	4.73301e-11	5.0232e-09
MergePeak_313	TraesCS1A03G0449900	-1.57212	-1.47357	4.73301e-11	5.0232e-09
MergePeak_314	TraesCS1A03G0450000	-0.691968	0.0152358	0.0380772	0.292612
MergePeak_315	TraesCS1A03G0450700	2.21201	1.12961	0.0114358	0.119243
MergePeak_316	TraesCS1A03G0451800	0.782022	1.16847	0.0020412	0.0295573
MergePeak_317	TraesCS1A03G0452600	-0.398356	0.864304	0.391315	0.966504
MergePeak_318	TraesCS1A03G0453100	2.33217	1.19111	0.0658839	0.426693
MergePeak_319	TraesCS1A03G0455000	2.76265	2.80489	4.7904e-09	3.28426e-07
MergePeak_320	TraesCS1A03G0455800	0.153323	0.894825	0.0966371	0.542928
MergePeak_321	TraesCS1A03G0455900	0.367095	0.620139	0.631655	0.966504
MergePeak_322	TraesCS1A03G0457400	-0.230695	-0.185185	0.175424	0.754847
MergePeak_323	TraesCS1A03G0459800	-1.1465	0.320067	0.901859	0.988239
MergePeak_324	TraesCS1A03G0460000	0.230175	0.716203	0.267242	0.912769
MergePeak_325	TraesCS1A03G0460600	-0.474929	0.613274	0.64477	0.966504
MergePeak_326	TraesCS1A03G0461300	-1.2705	-1.24671	3.25732e-10	2.88034e-08
MergePeak_327	TraesCS1A03G0461600	-0.326585	0.417885	0.879797	0.983326
MergePeak_328	TraesCS1A03G0462200	1.16204	0.911658	0.263109	0.906659
MergePeak_329	TraesCS1A03G0462400	1.76786	0.227793	0.76466	0.966504
MergePeak_330	TraesCS1A03G0464100	0.353259	0.706318	0.387584	0.966504
MergePeak_331	TraesCS1A03G0464100	1.66007	0.706318	0.387584	0.966504
MergePeak_332	TraesCS1A03G0465100	-1.96421	-2.10696	0.00330219	0.0438622
MergePeak_333	TraesCS1A03G0466200	0.716657	0.934242	0.105493	0.573304
MergePeak_334	TraesCS1A03G0468700	3.23712	2.61364	2.20487e-12	3.02947e-10
MergePeak_334	TraesCS1A03G0468800LC	3.23712	0.229588	0.210996	0.825975
MergePeak_335	TraesCS1A03G0469000	0.472359	0.838441	0.141056	0.674106
MergePeak_336	TraesCS1A03G0473800	0.704385	0.375099	0.879674	0.983303
MergePeak_337	TraesCS1A03G0474000	0.182685	0.536774	0.77573	0.966504
MergePeak_338	TraesCS1A03G0477800	-0.99384	-0.728014	9.19336e-05	0.00215357
MergePeak_339	TraesCS1A03G0480300	0.831019	0.596849	0.687406	0.966504
MergePeak_340	TraesCS1A03G0480400LC	-0.751182	-0.528107	0.00225786	0.0320723
MergePeak_341	TraesCS1A03G0482200	1.00613	0.992179	0.0494528	0.351103
MergePeak_342	TraesCS1A03G0482300	0.218796	0.913884	0.138516	0.667912
MergePeak_343	TraesCS1A03G0486400	-0.239125	0.435809	0.89458	0.985743
MergePeak_344	TraesCS1A03G0486900	0.363534	0.880473	0.0893793	0.517435
MergePeak_345	TraesCS1A03G0486900	-0.0488348	0.880473	0.0893793	0.517435
MergePeak_346	TraesCS1A03G0487400	-0.572188	-0.371603	0.00381353	0.0494093
MergePeak_346	TraesCS1A03G0487700	-0.572188	1.13358	0.0860139	0.505801
MergePeak_347	TraesCS1A03G0487700	-1.2699	1.13358	0.0860139	0.505801
MergePeak_347	TraesCS1A03G0487800LC	-1.2699	0.829317	0.270594	0.917529
MergePeak_348	TraesCS1A03G0488800	0.20544	0.439535	0.888768	0.983751
MergePeak_348	TraesCS1A03G0488900	0.20544	0.388895	0.693367	0.966504
MergePeak_349	TraesCS1A03G0489000	0.135058	0.821914	0.226939	0.85435
MergePeak_350	TraesCS1A03G0489900	-0.382571	0.675811	0.421723	0.966504
MergePeak_351	TraesCS1A03G0490000	1.7244	0.172703	0.470815	0.966504
MergePeak_352	TraesCS1A03G0490400	-1.55783	0.186774	0.366418	0.966504
MergePeak_353	TraesCS1A03G0490900	-0.459158	0.00543317	0.114431	0.600893
MergePeak_354	TraesCS1A03G0491900	0.53328	0.835203	0.201747	0.810009
MergePeak_355	TraesCS1A03G0492600	3.10533	1.41098	0.000144681	0.00317094
MergePeak_356	TraesCS1A03G0493700	1.74045	0.328689	0.888196	0.983422
MergePeak_357	TraesCS1A03G0494300LC	0.863949	-0.238493	0.503231	0.966504
MergePeak_358	TraesCS1A03G0494400	-0.122562	0	1	1
MergePeak_359	TraesCS1A03G0494500	1.25954	1.65454	3.71382e-07	1.66323e-05
MergePeak_360	TraesCS1A03G0494600	0.313518	0.412638	0.915936	0.992735
MergePeak_361	TraesCS1A03G0497100	0.54035	0.203697	0.273694	0.919542
MergePeak_362	TraesCS1A03G0497600	1.02233	0.584784	0.640529	0.966504
MergePeak_363	TraesCS1A03G0497900	-0.228621	0.425661	0.797666	0.967066
MergePeak_364	TraesCS1A03G0499300	-0.210348	-2.62223	1.74449e-08	1.06563e-06
MergePeak_364	TraesCS1A03G0499400	-0.210348	0.549994	0.728186	0.966504
MergePeak_365	TraesCS1A03G0502600	2.36738	2.10728	7.91577e-11	8.02908e-09
MergePeak_366	TraesCS1A03G0502800	3.58171	2.70362	1.49927e-13	2.61104e-11
MergePeak_367	TraesCS1A03G0503700	-0.266663	0.762773	0.197512	0.800588
MergePeak_367	TraesCS1A03G0503800	-0.266663	0	1	1
MergePeak_368	TraesCS1A03G0505200	1.00303	0.382658	0.647751	0.966504
MergePeak_369	TraesCS1A03G0506600	-0.476298	0.301174	0.725453	0.966504
MergePeak_370	TraesCS1A03G0506700	0.48101	0.299886	0.513249	0.966504
MergePeak_371	TraesCS1A03G0507400	-0.471481	0.649029	0.295049	0.946335
MergePeak_372	TraesCS1A03G0508700	0.206821	0.280528	0.766129	0.966504
MergePeak_373	TraesCS1A03G0508700	-3.32038	0.280528	0.766129	0.966504
MergePeak_374	TraesCS1A03G0510100	-0.421701	0.399392	0.409732	0.966504
MergePeak_375	TraesCS1A03G0511700	0.834685	0.897864	0.0843861	0.500568
MergePeak_376	TraesCS1A03G0513200	0.845625	1.16949	0.00821247	0.0918955
MergePeak_377	TraesCS1A03G0513200	0.97242	1.16949	0.00821247	0.0918955
MergePeak_378	TraesCS1A03G0515200	-0.498997	0.0347209	0.0664388	0.429026
MergePeak_379	TraesCS1A03G0515500	0.71375	0.615875	0.572931	0.966504
MergePeak_380	TraesCS1A03G0517100	-0.984431	0.656084	0.51078	0.966504
MergePeak_381	TraesCS1A03G0517100	0.0931984	0.656084	0.51078	0.966504
MergePeak_382	TraesCS1A03G0518600	-0.32985	0.181655	0.651821	0.966504
MergePeak_383	TraesCS1A03G0519800	-0.397943	-0.206942	0.00477644	0.0594018
MergePeak_384	TraesCS1A03G0519800	-0.532705	-0.206942	0.00477644	0.0594018
MergePeak_385	TraesCS1A03G0520500	-1.08186	0.313402	0.493158	0.966504
MergePeak_386	TraesCS1A03G0521700	-0.240536	0.468966	0.977552	0.996296
MergePeak_387	TraesCS1A03G0521900	-1.21758	0.776641	0.302483	0.955542
MergePeak_388	TraesCS1A03G0524200	-0.71496	0.689001	0.427057	0.966504
MergePeak_389	TraesCS1A03G0524400	0.758947	0.125879	0.244644	0.881881
MergePeak_390	TraesCS1A03G0524500	1.04065	0.680296	0.404008	0.966504
MergePeak_391	TraesCS1A03G0525100	-0.280049	0.864603	0.0581175	0.392347
MergePeak_392	TraesCS1A03G0525200	-1.03718	-0.866535	0.000369449	0.00709523
MergePeak_393	TraesCS1A03G0526600	-0.424462	0.517917	0.944524	0.996296
MergePeak_394	TraesCS1A03G0527300	0.627802	0.621038	0.613213	0.966504
MergePeak_395	TraesCS1A03G0528800	-1.35453	0.766349	0.169805	0.742269
MergePeak_395	TraesCS1A03G0528900	-1.35453	1.81079	4.69654e-06	0.000159462
MergePeak_396	TraesCS1A03G0529100	-0.069606	0.241133	0.288144	0.936461
MergePeak_397	TraesCS1A03G0529300	-0.27833	0.191037	0.650235	0.966504
MergePeak_398	TraesCS1A03G0529300	1.83668	0.191037	0.650235	0.966504
MergePeak_399	TraesCS1A03G0529400	2.03335	1.27563	0.000381401	0.00729013
MergePeak_400	TraesCS1A03G0529400	-0.0129624	1.27563	0.000381401	0.00729013
MergePeak_401	TraesCS1A03G0530200	0.426956	0.563313	0.767143	0.966504
MergePeak_402	TraesCS1A03G0530600	-1.23297	0.724291	0.40358	0.966504
MergePeak_403	TraesCS1A03G0530600	1.26245	0.724291	0.40358	0.966504
MergePeak_404	TraesCS1A03G0531000	-0.0807125	0.0877364	0.100326	0.555801
MergePeak_405	TraesCS1A03G0531200	2.58408	0.437468	0.974607	0.996296
MergePeak_405	TraesCS1A03G0531300	2.58408	0.202201	0.74618	0.966504
MergePeak_406	TraesCS1A03G0531200	0.716419	0.437468	0.974607	0.996296
MergePeak_407	TraesCS1A03G0533000	-0.0424617	0.461092	0.842459	0.976133
MergePeak_408	TraesCS1A03G0536900	0.739523	0.399942	0.789115	0.966504
MergePeak_409	TraesCS1A03G0537300	0.484577	0.241512	0.608314	0.966504
MergePeak_410	TraesCS1A03G0539600	-0.314268	0.307687	0.522379	0.966504
MergePeak_411	TraesCS1A03G0541300	0.300763	0.813521	0.173109	0.750762
MergePeak_412	TraesCS1A03G0542000	0.509902	0.753876	0.290053	0.93938
MergePeak_413	TraesCS1A03G0544100	0.111943	0.623481	0.353713	0.966504
MergePeak_414	TraesCS1A03G0546300	-1.92258	0.094003	0.193825	0.792219
MergePeak_415	TraesCS1A03G0546300	0.495268	0.094003	0.193825	0.792219
MergePeak_416	TraesCS1A03G0546600	-1.05029	0.303773	0.52578	0.966504
MergePeak_417	TraesCS1A03G0547200	-0.0232467	0.95153	0.163709	0.729518
MergePeak_418	TraesCS1A03G0547200	-0.560116	0.95153	0.163709	0.729518
MergePeak_419	TraesCS1A03G0547700	0.632328	0.739717	0.218169	0.838743
MergePeak_420	TraesCS1A03G0547800	2.77324	0.951969	0.0968791	0.54372
MergePeak_421	TraesCS1A03G0547900	2.5486	1.33474	0.0207967	0.187435
MergePeak_422	TraesCS1A03G0548300	-0.994137	-0.938314	8.67016e-07	3.55019e-05
MergePeak_423	TraesCS1A03G0548400	-0.448556	-0.0655168	0.184489	0.774424
MergePeak_424	TraesCS1A03G0550100	-0.494678	0.4135	0.812747	0.968866
MergePeak_425	TraesCS1A03G0550700	2.41138	0.253208	0.839199	0.975298
MergePeak_426	TraesCS1A03G0551300	0.332855	0.62102	0.613502	0.966504
MergePeak_427	TraesCS1A03G0554200	0.204741	0.401865	0.694932	0.966504
MergePeak_428	TraesCS1A03G0554900	0.0204721	1.00421	0.0250019	0.215198
MergePeak_429	TraesCS1A03G0555200	0.534955	0.828779	0.363562	0.966504
MergePeak_430	TraesCS1A03G0557400	-0.918488	-0.34173	0.103761	0.567071
MergePeak_431	TraesCS1A03G0559700	-1.46531	0.394792	0.549667	0.966504
MergePeak_432	TraesCS1A03G0560100	1.2429	0.955041	0.0599513	0.400214
MergePeak_433	TraesCS1A03G0560800	-0.586365	0.0350351	0.0938344	0.533703
MergePeak_434	TraesCS1A03G0560900	1.00719	-0.0464738	0.153904	0.706311
MergePeak_435	TraesCS1A03G0561200	0.917418	0.163192	0.811979	0.968484
MergePeak_436	TraesCS1A03G0561300	-0.589994	0.36811	0.56336	0.966504
MergePeak_437	TraesCS1A03G0561300	0.178105	0.36811	0.56336	0.966504
MergePeak_438	TraesCS1A03G0561900LC	0.207631	-0.160663	0.340771	0.966504
MergePeak_439	TraesCS1A03G0562200	-1.01595	0.94001	0.100685	0.557026
MergePeak_440	TraesCS1A03G0563000LC	1.16487	-0.395703	0.101198	0.558567
MergePeak_441	TraesCS1A03G0568200	0.306367	0.816765	0.119579	0.615988
MergePeak_442	TraesCS1A03G0568300	2.22824	0.692535	0.484561	0.966504
MergePeak_443	TraesCS1A03G0568600	-0.329392	0.566592	0.71517	0.966504
MergePeak_444	TraesCS1A03G0568800	-0.957541	0.055387	0.0639501	0.418085
MergePeak_445	TraesCS1A03G0569000	2.39117	1.28863	0.0298025	0.245184
MergePeak_446	TraesCS1A03G0571800	0.35683	0.447977	0.984933	0.996296
MergePeak_447	TraesCS1A03G0571900	1.56113	0.649547	0.490243	0.966504
MergePeak_448	TraesCS1A03G0572600	0.303498	0.415166	0.668391	0.966504
MergePeak_449	TraesCS1A03G0573200	1.43341	0.108689	0.761479	0.966504
MergePeak_450	TraesCS1A03G0573400	-0.519124	0.430291	0.777159	0.966504
MergePeak_451	TraesCS1A03G0573800	-0.660879	-0.360625	0.000525359	0.00960458
MergePeak_452	TraesCS1A03G0574000	-1.35913	0.903613	0.135104	0.658969
MergePeak_453	TraesCS1A03G0575100	-2.52539	0.977858	0.0376855	0.290462
MergePeak_454	TraesCS1A03G0575100	-0.129003	0.977858	0.0376855	0.290462
MergePeak_455	TraesCS1A03G0575400	2.41252	0.931742	0.106605	0.577201
MergePeak_456	TraesCS1A03G0577200	0.42877	0.790838	0.171338	0.746083
MergePeak_457	TraesCS1A03G0578400	-0.0424694	0.701867	0.298669	0.95217
MergePeak_458	TraesCS1A03G0579500	1.32411	0.996847	0.0730044	0.455937
MergePeak_459	TraesCS1A03G0580200	0.204446	0.432295	0.842956	0.976196
MergePeak_460	TraesCS1A03G0581700	-0.600612	0.792749	0.188491	0.78264
MergePeak_461	TraesCS1A03G0583200	-0.118349	-0.475778	0.0215619	0.192827
MergePeak_461	TraesCS1A03G0583300	-0.118349	0.911414	0.244193	0.881036
MergePeak_462	TraesCS1A03G0583200	1.0566	-0.475778	0.0215619	0.192827
MergePeak_462	TraesCS1A03G0583300	1.0566	0.911414	0.244193	0.881036
MergePeak_463	TraesCS1A03G0583200	2.54016	-0.475778	0.0215619	0.192827
MergePeak_463	TraesCS1A03G0583300	2.54016	0.911414	0.244193	0.881036
MergePeak_464	TraesCS1A03G0584500	-0.508802	-0.371054	0.000415672	0.00785388
MergePeak_465	TraesCS1A03G0585600	-0.175996	0.59229	0.648903	0.966504
MergePeak_466	TraesCS1A03G0585900	-0.506153	0.665349	0.696096	0.966504
MergePeak_467	TraesCS1A03G0587300	-0.375367	-0.18284	0.00411393	0.0526127
MergePeak_468	TraesCS1A03G0587800	3.26843	0.303136	0.375178	0.966504
MergePeak_469	TraesCS1A03G0587800	-0.444504	0.303136	0.375178	0.966504
MergePeak_470	TraesCS1A03G0589700	0.759371	0.339525	0.662615	0.966504
MergePeak_471	TraesCS1A03G0590000	0.251101	0.746733	0.361414	0.966504
MergePeak_472	TraesCS1A03G0591500	1.19691	1.1233	0.020144	0.182929
MergePeak_473	TraesCS1A03G0592100LC	2.18551	-0.10241	0.531781	0.966504
MergePeak_474	TraesCS1A03G0593200LC	0.168982	0.307484	0.665917	0.966504
MergePeak_474	TraesCS1A03G0593300	0.168982	1.06076	0.028953	0.240418
MergePeak_475	TraesCS1A03G0593400	-2.25136	1.05302	0.027693	0.232744
MergePeak_476	TraesCS1A03G0593700	-0.588918	0.636272	0.425804	0.966504
MergePeak_477	TraesCS1A03G0594700LC	-0.76808	0.0398872	0.749603	0.966504
MergePeak_478	TraesCS1A03G0597000	0.359498	0.205096	0.627159	0.966504
MergePeak_479	TraesCS1A03G0597500	0.835603	0.277411	0.487078	0.966504
MergePeak_480	TraesCS1A03G0597600	0.377753	0.0620811	0.246208	0.884348
MergePeak_481	TraesCS1A03G0599900	3.9846	0.49452	0.910884	0.99057
MergePeak_482	TraesCS1A03G0600400	0.267264	1.02534	0.02015	0.182966
MergePeak_483	TraesCS1A03G0605200	0.16394	1.01212	0.0444386	0.325362
MergePeak_484	TraesCS1A03G0605500	-0.844405	0.524241	0.684529	0.966504
MergePeak_485	TraesCS1A03G0605500	-0.443517	0.524241	0.684529	0.966504
MergePeak_486	TraesCS1A03G0605600	-1.98978	0.138233	0.46629	0.966504
MergePeak_487	TraesCS1A03G0605700	0.37311	0.71994	0.256814	0.899857
MergePeak_488	TraesCS1A03G0606500	-0.382262	0.551611	0.841053	0.976017
MergePeak_489	TraesCS1A03G0607800	-0.304262	0.317928	0.444878	0.966504
MergePeak_490	TraesCS1A03G0608300	-1.1753	-0.676839	2.01797e-06	7.54632e-05
MergePeak_491	TraesCS1A03G0610200	0.111888	0.614463	0.672611	0.966504
MergePeak_492	TraesCS1A03G0611000	2.49663	1.77448	1.23059e-06	4.85647e-05
MergePeak_493	TraesCS1A03G0612600LC	1.01639	0.592398	0.742886	0.966504
MergePeak_494	TraesCS1A03G0613700	0.491884	1.44789	0.000206601	0.004322
MergePeak_495	TraesCS1A03G0613700	1.48574	1.44789	0.000206601	0.004322
MergePeak_496	TraesCS1A03G0621900	-0.16112	0.282765	0.499494	0.966504
MergePeak_497	TraesCS1A03G0622000	0.276398	0.612552	0.56563	0.966504
MergePeak_498	TraesCS1A03G0622400	-0.242712	-0.441517	0.000174433	0.0037336
MergePeak_499	TraesCS1A03G0623300	0.516099	0.297539	0.688934	0.966504
MergePeak_499	TraesCS1A03G0623400	0.516099	1.22345	0.0191288	0.175917
MergePeak_500	TraesCS1A03G0623900	-1.26945	0.744604	0.253605	0.894291
MergePeak_501	TraesCS1A03G0624800	1.69508	0.410977	0.987852	0.996296
MergePeak_502	TraesCS1A03G0625600	-0.707748	0.0151205	0.0292939	0.242376
MergePeak_503	TraesCS1A03G0626000	0.0405347	0.411492	0.778698	0.966504
MergePeak_504	TraesCS1A03G0627000	0.869043	0.334182	0.513289	0.966504
MergePeak_505	TraesCS1A03G0628100	-1.29074	0.994633	0.0607867	0.404067
MergePeak_506	TraesCS1A03G0628200LC	-1.02473	-0.870256	4.01345e-08	2.29012e-06
MergePeak_507	TraesCS1A03G0628200LC	-1.64039	-0.870256	4.01345e-08	2.29012e-06
MergePeak_508	TraesCS1A03G0628300	0.442352	1.12967	0.0219299	0.195433
MergePeak_509	TraesCS1A03G0628300	0.94925	1.12967	0.0219299	0.195433
MergePeak_510	TraesCS1A03G0628900	1.30304	0.669036	0.500781	0.966504
MergePeak_511	TraesCS1A03G0629600	-0.835998	0.381634	0.693728	0.966504
MergePeak_512	TraesCS1A03G0630100	-1.46979	-0.998079	2.25789e-07	1.06374e-05
MergePeak_513	TraesCS1A03G0632000	-0.0914524	0.394377	0.967177	0.996296
MergePeak_514	TraesCS1A03G0632600	-0.279353	0.508176	0.775294	0.966504
MergePeak_515	TraesCS1A03G0634400	-0.213671	-0.688231	0.00326972	0.0434849
MergePeak_516	TraesCS1A03G0634500	1.05179	0.476998	0.87733	0.982795
MergePeak_517	TraesCS1A03G0637200	0.0976244	0.640965	0.0178953	0.16743
MergePeak_517	TraesCS1A03G0637300	0.0976244	1.08756	0.0126054	0.128577
MergePeak_518	TraesCS1A03G0637300	0.211501	1.08756	0.0126054	0.128577
MergePeak_519	TraesCS1A03G0637400	0.833476	0.769222	0.211067	0.826076
MergePeak_520	TraesCS1A03G0637500	0.637829	0.80942	0.172253	0.748387
MergePeak_521	TraesCS1A03G0638500	0.586034	0.885812	0.0877961	0.512491
MergePeak_522	TraesCS1A03G0641500	0.914276	0.159199	0.707908	0.966504
MergePeak_523	TraesCS1A03G0642300	-0.757294	0.608336	0.596547	0.966504
MergePeak_524	TraesCS1A03G0642700	-0.250468	0.594969	0.659749	0.966504
MergePeak_525	TraesCS1A03G0642800	3.5745	0.680119	0.474592	0.966504
MergePeak_526	TraesCS1A03G0642900LC	0.725497	0.561008	0.799273	0.967066
MergePeak_527	TraesCS1A03G0643000	0.139959	0.540342	0.78938	0.966504
MergePeak_528	TraesCS1A03G0643900	-0.290884	0.297768	0.867788	0.980066
MergePeak_529	TraesCS1A03G0645500	-0.0609075	0.333672	0.586499	0.966504
MergePeak_530	TraesCS1A03G0645500	-0.39468	0.333672	0.586499	0.966504
MergePeak_531	TraesCS1A03G0646700	1.21361	0.750736	0.348511	0.966504
MergePeak_532	TraesCS1A03G0647900	-0.370606	-0.0679835	0.231349	0.860888
MergePeak_532	TraesCS1A03G0648000	-0.370606	0.170249	0.442725	0.966504
MergePeak_533	TraesCS1A03G0647900	0.936981	-0.0679835	0.231349	0.860888
MergePeak_533	TraesCS1A03G0648000	0.936981	0.170249	0.442725	0.966504
MergePeak_534	TraesCS1A03G0648200LC	-1.62914	0	1	1
MergePeak_535	TraesCS1A03G0648400	-1.39292	-1.11075	4.65668e-07	2.03593e-05
MergePeak_536	TraesCS1A03G0649000	0.00843401	0.273888	0.304143	0.955772
MergePeak_537	TraesCS1A03G0649100	0.630363	0.855093	0.11106	0.590377
MergePeak_538	TraesCS1A03G0650100	0.0699228	0.874386	0.229302	0.85846
MergePeak_539	TraesCS1A03G0650500	-1.10656	-0.717878	5.73543e-05	0.00143318
MergePeak_540	TraesCS1A03G0650800	-0.65881	-0.129038	0.0528741	0.367881
MergePeak_541	TraesCS1A03G0652200	4.42502	4.06198	9.62804e-08	5.00514e-06
MergePeak_542	TraesCS1A03G0652400	0.185116	1.71303	2.042e-05	0.000579866
MergePeak_543	TraesCS1A03G0652400	-1.58729	1.71303	2.042e-05	0.000579866
MergePeak_544	TraesCS1A03G0653300	2.33254	1.08126	0.00847269	0.0941126
MergePeak_545	TraesCS1A03G0653300	-0.387378	1.08126	0.00847269	0.0941126
MergePeak_546	TraesCS1A03G0655700	0.289464	0.344308	0.536123	0.966504
MergePeak_547	TraesCS1A03G0656200	1.70966	0.458943	0.934382	0.996296
MergePeak_548	TraesCS1A03G0656400	0.374922	0.778145	0.281585	0.926303
MergePeak_549	TraesCS1A03G0656400	0.0859024	0.778145	0.281585	0.926303
MergePeak_550	TraesCS1A03G0657800	0.455988	0.341823	0.480708	0.966504
MergePeak_551	TraesCS1A03G0657900	0.170719	0.639094	0.641439	0.966504
MergePeak_552	TraesCS1A03G0659000	0.434289	0.482964	0.557195	0.966504
MergePeak_553	TraesCS1A03G0659500	3.1307	2.58728	3.14937e-10	2.79507e-08
MergePeak_554	TraesCS1A03G0659600LC	-2.12758	0	1	1
MergePeak_554	TraesCS1A03G0659700	-2.12758	0	1	1
MergePeak_555	TraesCS1A03G0660000	2.38977	1.19944	0.00492057	0.0608588
MergePeak_556	TraesCS1A03G0660000	0.451042	1.19944	0.00492057	0.0608588
MergePeak_557	TraesCS1A03G0661700	-2.79795	0.181905	0.18473	0.775067
MergePeak_558	TraesCS1A03G0661700	0.639225	0.181905	0.18473	0.775067
MergePeak_559	TraesCS1A03G0663200	-0.730954	1.12019	0.0405789	0.305667
MergePeak_560	TraesCS1A03G0663200	0.116274	1.12019	0.0405789	0.305667
MergePeak_561	TraesCS1A03G0664300	-2.64952	-1.26013	2.81122e-08	1.64973e-06
MergePeak_562	TraesCS1A03G0664700	2.22986	0.192942	0.767232	0.966504
MergePeak_563	TraesCS1A03G0666400	1.76729	0.417365	0.610108	0.966504
MergePeak_564	TraesCS1A03G0666500	0.524709	0.753065	0.354933	0.966504
MergePeak_565	TraesCS1A03G0666800	-0.432905	0.251439	0.622473	0.966504
MergePeak_566	TraesCS1A03G0667200	-0.0244915	0.119085	0.230074	0.858714
MergePeak_567	TraesCS1A03G0667800	0.0681426	0.793842	0.177891	0.759949
MergePeak_568	TraesCS1A03G0669300	1.93051	0.153717	0.298484	0.951904
MergePeak_569	TraesCS1A03G0669500	2.22133	0.754348	0.509471	0.966504
MergePeak_570	TraesCS1A03G0670100	0.0198924	0.296837	0.571003	0.966504
MergePeak_571	TraesCS1A03G0671100	-0.343186	-0.051536	0.0111215	0.116744
MergePeak_572	TraesCS1A03G0671300	-0.422457	-0.202394	0.0580325	0.391936
MergePeak_573	TraesCS1A03G0671500	0.487362	0.993518	0.0554797	0.380148
MergePeak_574	TraesCS1A03G0671500	0.829543	0.993518	0.0554797	0.380148
MergePeak_575	TraesCS1A03G0672500	1.06727	0.618241	0.405111	0.966504
MergePeak_576	TraesCS1A03G0674000	-0.0197983	0.287919	0.561948	0.966504
MergePeak_577	TraesCS1A03G0674500	1.43651	0.67979	0.152315	0.702281
MergePeak_578	TraesCS1A03G0676100	1.21672	1.4796	0.000157553	0.00341526
MergePeak_579	TraesCS1A03G0676300	0.885945	0.44273	0.859038	0.976999
MergePeak_580	TraesCS1A03G0676500	1.20131	0.568242	0.813591	0.969282
MergePeak_581	TraesCS1A03G0679900	-2.26476	-0.328836	0.0483111	0.345857
MergePeak_582	TraesCS1A03G0681800	-1.5679	-1.24347	3.86157e-09	2.71047e-07
MergePeak_583	TraesCS1A03G0682100	-1.88263	-0.615234	0.00807043	0.0906722
MergePeak_584	TraesCS1A03G0682300	0.73981	0.115678	0.919206	0.993636
MergePeak_585	TraesCS1A03G0682400	0.144632	0.901534	0.0760795	0.468695
MergePeak_586	TraesCS1A03G0683300LC	0.398595	0	1	1
MergePeak_586	TraesCS1A03G0683400	0.398595	1.11124	0.0234241	0.205149
MergePeak_587	TraesCS1A03G0685100	0.399434	0.643785	0.545813	0.966504
MergePeak_588	TraesCS1A03G0687700	0.688499	0.480994	0.846479	0.976573
MergePeak_589	TraesCS1A03G0688000	-3.0701	0.705587	0.434574	0.966504
MergePeak_590	TraesCS1A03G0688000	0.0808339	0.705587	0.434574	0.966504
MergePeak_591	TraesCS1A03G0688300LC	0.585987	0.381573	0.961645	0.996296
MergePeak_592	TraesCS1A03G0690100	1.02465	0.64466	0.558603	0.966504
MergePeak_593	TraesCS1A03G0690100	0.0206366	0.64466	0.558603	0.966504
MergePeak_594	TraesCS1A03G0691100	0.196637	-0.256454	0.0835144	0.497527
MergePeak_595	TraesCS1A03G0693200	1.64811	1.04646	0.0472622	0.340459
MergePeak_596	TraesCS1A03G0693600	0.449651	0.352406	0.776541	0.966504
MergePeak_597	TraesCS1A03G0694200	-0.419031	0.658146	0.508397	0.966504
MergePeak_598	TraesCS1A03G0696400	-0.0148516	0.518473	0.769125	0.966504
MergePeak_599	TraesCS1A03G0698000	-0.984379	0.247016	0.612015	0.966504
MergePeak_600	TraesCS1A03G0701100	0.203361	0.385561	0.749313	0.966504
MergePeak_601	TraesCS1A03G0701700	-0.705134	0.011718	0.110023	0.587559
MergePeak_602	TraesCS1A03G0702200	-0.411023	0.154583	0.228939	0.858277
MergePeak_603	TraesCS1A03G0702300	-2.34299	-0.0873592	0.153751	0.706123
MergePeak_604	TraesCS1A03G0709000	-0.583053	-0.478823	0.000161837	0.00349484
MergePeak_605	TraesCS1A03G0710500	-0.446984	0.566293	0.815721	0.970169
MergePeak_606	TraesCS1A03G0711700	0.225824	0.953899	0.0833851	0.497093
MergePeak_607	TraesCS1A03G0712000	-0.0878252	0.641024	0.566833	0.966504
MergePeak_608	TraesCS1A03G0713800	2.67675	0.460069	0.897483	0.986777
MergePeak_609	TraesCS1A03G0713800	0.238315	0.460069	0.897483	0.986777
MergePeak_610	TraesCS1A03G0714200LC	-2.67013	0	1	1
MergePeak_611	TraesCS1A03G0714500	-0.145684	0.848249	0.147404	0.691464
MergePeak_611	TraesCS1A03G0714700LC	-0.145684	0.571562	0.763178	0.966504
MergePeak_612	TraesCS1A03G0714700LC	2.98736	0.571562	0.763178	0.966504
MergePeak_613	TraesCS1A03G0716600	0.773922	0.118422	0.627998	0.966504
MergePeak_614	TraesCS1A03G0716700	0.946384	0.874095	0.0938283	0.5337
MergePeak_615	TraesCS1A03G0717000	-0.936932	-0.280922	0.0118238	0.122264
MergePeak_616	TraesCS1A03G0719000	-0.421905	-0.673763	0.000144072	0.00316046
MergePeak_617	TraesCS1A03G0720100	0.918595	0.613655	0.69489	0.966504
MergePeak_618	TraesCS1A03G0720300	0.971609	1.17201	0.0054763	0.0664527
MergePeak_619	TraesCS1A03G0720400	1.04724	0.929347	0.159129	0.718593
MergePeak_620	TraesCS1A03G0721500	0.18072	0.0730605	0.0373482	0.288656
MergePeak_621	TraesCS1A03G0722700	-0.668338	0.812232	0.162269	0.725647
MergePeak_622	TraesCS1A03G0723100	0.255542	0.602676	0.401906	0.966504
MergePeak_623	TraesCS1A03G0725200	-0.918117	0.606782	0.529864	0.966504
MergePeak_624	TraesCS1A03G0725700	0.18896	0.548526	0.769686	0.966504
MergePeak_625	TraesCS1A03G0726600	1.46116	-0.65764	0.429644	0.966504
MergePeak_626	TraesCS1A03G0727200	0.526692	-0.0660156	0.796592	0.966504
MergePeak_627	TraesCS1A03G0727700	0.968934	0	1	1
MergePeak_628	TraesCS1A03G0728000	-1.31652	-1.60025	0.00895867	0.0984398
MergePeak_629	TraesCS1A03G0730000LC	-1.21039	0.24767	0.996925	0.998675
MergePeak_630	TraesCS1A03G0731000	0.340911	0.0266877	0.0933147	0.53212
MergePeak_631	TraesCS1A03G0731300	0.281717	0.164487	0.2514	0.890549
MergePeak_632	TraesCS1A03G0736800	-0.916829	-0.78314	1.90716e-05	0.000547181
MergePeak_633	TraesCS1A03G0737000	2.66966	0.68802	0.410083	0.966504
MergePeak_633	TraesCS1A03G0737100LC	2.66966	0.498848	0.534394	0.966504
MergePeak_634	TraesCS1A03G0737400	0.313539	0.510435	0.790664	0.966504
MergePeak_635	TraesCS1A03G0737400	-1.67704	0.510435	0.790664	0.966504
MergePeak_636	TraesCS1A03G0738800	0.268178	0.5938	0.535723	0.966504
MergePeak_637	TraesCS1A03G0741100	0.160545	-0.37265	0.0771547	0.473444
MergePeak_638	TraesCS1A03G0742600	-0.450995	0.177144	0.329332	0.966504
MergePeak_639	TraesCS1A03G0742700	-0.232797	-0.151882	0.0264952	0.224831
MergePeak_640	TraesCS1A03G0744900	-0.753073	0.583561	0.713892	0.966504
MergePeak_641	TraesCS1A03G0749100	0.16803	0.865531	0.154842	0.708372
MergePeak_642	TraesCS1A03G0749900	-0.778981	-0.99269	5.10658e-05	0.00129845
MergePeak_643	TraesCS1A03G0752900	-0.743266	-0.602985	0.000242143	0.00495964
MergePeak_644	TraesCS1A03G0752900	-1.34935	-0.602985	0.000242143	0.00495964
MergePeak_645	TraesCS1A03G0753400	0.746463	0.56774	0.737938	0.966504
MergePeak_646	TraesCS1A03G0754600	-1.04049	0.0934592	0.233032	0.864107
MergePeak_647	TraesCS1A03G0756500	0.328057	0.141001	0.326689	0.966504
MergePeak_648	TraesCS1A03G0756800	-0.230668	0.471665	0.955233	0.996296
MergePeak_649	TraesCS1A03G0758200	1.26614	0.306895	0.618951	0.966504
MergePeak_650	TraesCS1A03G0758500	-3.79339	-1.22909	0.000776516	0.0133437
MergePeak_651	TraesCS1A03G0759800	1.20352	0.441277	0.601806	0.966504
MergePeak_652	TraesCS1A03G0760300	0.645348	1.3023	0.00684325	0.0794997
MergePeak_653	TraesCS1A03G0761500	0.456115	0.381561	0.958883	0.996296
MergePeak_654	TraesCS1A03G0761800	-1.03076	0.354006	0.769766	0.966504
MergePeak_655	TraesCS1A03G0761900	-5.00561	-3.65239	5.69821e-51	3.45468e-47
MergePeak_656	TraesCS1A03G0763600	0.501523	0.55433	0.870384	0.981019
MergePeak_657	TraesCS1A03G0764000	0.4032	0.758445	0.300946	0.953848
MergePeak_658	TraesCS1A03G0765200	0.367473	0.780162	0.32405	0.966504
MergePeak_659	TraesCS1A03G0766800	-0.781635	-0.609158	6.07625e-05	0.00150901
MergePeak_660	TraesCS1A03G0771200LC	0.822552	0.276039	0.788596	0.966504
MergePeak_660	TraesCS1A03G0771300LC	0.822552	0.40474	0.931026	0.996296
MergePeak_661	TraesCS1A03G0771300LC	2.55281	0.40474	0.931026	0.996296
MergePeak_662	TraesCS1A03G0773400	0.193968	0.92788	0.09677	0.543422
MergePeak_663	TraesCS1A03G0773900	0.620429	0.206815	0.586584	0.966504
MergePeak_664	TraesCS1A03G0774200	-1.17825	-0.899079	0.00286801	0.0390852
MergePeak_665	TraesCS1A03G0778700	-3.02761	-2.31752	2.91213e-05	0.000788852
MergePeak_666	TraesCS1A03G0780800	1.01699	0.285401	0.324329	0.966504
MergePeak_667	TraesCS1A03G0780800	0.439922	0.285401	0.324329	0.966504
MergePeak_668	TraesCS1A03G0782500	1.52256	0.622663	0.541007	0.966504
MergePeak_669	TraesCS1A03G0782800	-0.497637	0.140761	0.236005	0.86945
MergePeak_670	TraesCS1A03G0784800	0.687765	0.148263	0.400206	0.966504
MergePeak_671	TraesCS1A03G0786600	-0.101416	0.567869	0.841779	0.976017
MergePeak_671	TraesCS1A03G0786700LC	-0.101416	0.308849	0.29725	0.949938
MergePeak_672	TraesCS1A03G0787500	-2.67434	-0.369338	2.0251e-05	0.000575235
MergePeak_673	TraesCS1A03G0788500LC	-0.171004	0.246577	0.975589	0.996296
MergePeak_674	TraesCS1A03G0793500	2.84834	0.5206	0.96444	0.996296
MergePeak_675	TraesCS1A03G0794600	1.81467	0.714995	0.365941	0.966504
MergePeak_676	TraesCS1A03G0796800	0.320074	0.123187	0.272396	0.918673
MergePeak_677	TraesCS1A03G0797000	-0.731674	-0.0847141	0.186219	0.777147
MergePeak_678	TraesCS1A03G0797200	0.0412809	0.621195	0.548259	0.966504
MergePeak_679	TraesCS1A03G0801100	0.0585466	0.263662	0.447978	0.966504
MergePeak_680	TraesCS1A03G0801400	2.68839	0.852076	0.119503	0.615757
MergePeak_681	TraesCS1A03G0801800	-0.0913692	0.231458	0.526343	0.966504
MergePeak_682	TraesCS1A03G0808300	-0.15482	1.92041	3.09698e-08	1.80324e-06
MergePeak_683	TraesCS1A03G0808700	0.843203	0.454225	0.846856	0.976643
MergePeak_684	TraesCS1A03G0808700	0.236182	0.454225	0.846856	0.976643
MergePeak_685	TraesCS1A03G0809200	0.0545133	0.63337	0.463191	0.966504
MergePeak_686	TraesCS1A03G0809600	-0.507679	-0.103488	0.212466	0.829212
MergePeak_687	TraesCS1A03G0810700	0.584615	0.608218	0.642756	0.966504
MergePeak_688	TraesCS1A03G0811400	-0.29646	0.0107722	0.706805	0.966504
MergePeak_689	TraesCS1A03G0811600	0.281244	0.564735	0.769588	0.966504
MergePeak_690	TraesCS1A03G0815700	0.882313	0.667774	0.0666948	0.430078
MergePeak_691	TraesCS1A03G0815700	0.543061	0.667774	0.0666948	0.430078
MergePeak_692	TraesCS1A03G0818800	0.0576074	0.740516	0.259097	0.902542
MergePeak_693	TraesCS1A03G0819200	0.0472248	0.905304	0.147629	0.692183
MergePeak_694	TraesCS1A03G0819200	-0.165026	0.905304	0.147629	0.692183
MergePeak_695	TraesCS1A03G0819300	0.330957	0.893099	0.0723419	0.452872
MergePeak_696	TraesCS1A03G0820700	-0.0980134	0.47546	0.962969	0.996296
MergePeak_697	TraesCS1A03G0822500	-0.267099	0.538129	0.681896	0.966504
MergePeak_698	TraesCS1A03G0823600	-0.468913	0.350444	0.725189	0.966504
MergePeak_699	TraesCS1A03G0824000	-0.355396	-1.36626	9.8312e-09	6.33244e-07
MergePeak_700	TraesCS1A03G0824600	-0.354615	0.0974888	0.561201	0.966504
MergePeak_701	TraesCS1A03G0825700	2.55875	0.791053	0.0748515	0.463807
MergePeak_702	TraesCS1A03G0826100	-1.22192	-0.239316	0.067762	0.43482
MergePeak_703	TraesCS1A03G0826800	1.31394	0.972223	0.0524989	0.366319
MergePeak_704	TraesCS1A03G0827300	0.300691	0.458966	0.857942	0.976999
MergePeak_705	TraesCS1A03G0829100	1.44278	0.178053	0.926954	0.995817
MergePeak_706	TraesCS1A03G0830500	0.338398	0.325675	0.671386	0.966504
MergePeak_707	TraesCS1A03G0830600	0.394257	0.673083	0.429028	0.966504
MergePeak_708	TraesCS1A03G0831300LC	-0.96291	-0.434028	0.355587	0.966504
MergePeak_709	TraesCS1A03G0834600	-1.14947	0.390204	0.592047	0.966504
MergePeak_710	TraesCS1A03G0834600	0.176858	0.390204	0.592047	0.966504
MergePeak_711	TraesCS1A03G0836000	-0.272551	0.394015	0.836687	0.974197
MergePeak_712	TraesCS1A03G0837600	-0.125539	0.00646312	0.0937128	0.53357
MergePeak_713	TraesCS1A03G0839100	0.704788	0.860045	0.125075	0.632243
MergePeak_714	TraesCS1A03G0839100	0.161666	0.860045	0.125075	0.632243
MergePeak_715	TraesCS1A03G0839500	0.179996	0.35509	0.726877	0.966504
MergePeak_716	TraesCS1A03G0840000	0.302885	0.756351	0.27369	0.919542
MergePeak_717	TraesCS1A03G0841000	-0.365039	0.203639	0.676281	0.966504
MergePeak_718	TraesCS1A03G0842700	2.23236	0.235314	0.816563	0.970478
MergePeak_719	TraesCS1A03G0843400	0.219964	0.356677	0.932161	0.996296
MergePeak_720	TraesCS1A03G0843600	0.834489	0.218625	0.601222	0.966504
MergePeak_721	TraesCS1A03G0843600	-0.140027	0.218625	0.601222	0.966504
MergePeak_722	TraesCS1A03G0845300	-1.09014	0.817682	0.132106	0.650764
MergePeak_722	TraesCS1A03G0845500	-1.09014	2.97958	7.73882e-23	4.01442e-20
MergePeak_723	TraesCS1A03G0845300	1.63322	0.817682	0.132106	0.650764
MergePeak_723	TraesCS1A03G0845500	1.63322	2.97958	7.73882e-23	4.01442e-20
MergePeak_724	TraesCS1A03G0847400LC	1.31731	0.258363	0.52639	0.966504
MergePeak_725	TraesCS1A03G0847500	-0.263573	0.380166	0.626829	0.966504
MergePeak_726	TraesCS1A03G0850600	0.330752	0.325805	0.926548	0.99569
MergePeak_727	TraesCS1A03G0851700	-0.116966	0.137568	0.543587	0.966504
MergePeak_728	TraesCS1A03G0851800	-1.15334	0.908808	0.154298	0.70716
MergePeak_729	TraesCS1A03G0852200	3.10891	0.66802	0.374082	0.966504
MergePeak_730	TraesCS1A03G0853300	-0.607667	0.29693	0.599911	0.966504
MergePeak_731	TraesCS1A03G0855800	-0.493807	1.16781	0.0283358	0.236609
MergePeak_732	TraesCS1A03G0855900	0.532611	0.999201	0.0949644	0.537452
MergePeak_733	TraesCS1A03G0858300	-0.244805	-0.14091	0.0557995	0.381641
MergePeak_734	TraesCS1A03G0858500	1.14064	0.710661	0.369484	0.966504
MergePeak_735	TraesCS1A03G0859900	-0.090027	0.450783	0.871376	0.981339
MergePeak_736	TraesCS1A03G0860000	3.43395	0.527505	0.833794	0.972979
MergePeak_737	TraesCS1A03G0863800	2.25741	0	1	1
MergePeak_737	TraesCS1A03G0863900	2.25741	0.846967	0.145236	0.685238
MergePeak_738	TraesCS1A03G0863800	1.48818	0	1	1
MergePeak_738	TraesCS1A03G0863900	1.48818	0.846967	0.145236	0.685238
MergePeak_739	TraesCS1A03G0864500	1.45747	0.576296	0.6345	0.966504
MergePeak_740	TraesCS1A03G0865000	0.36862	0.187632	0.641326	0.966504
MergePeak_741	TraesCS1A03G0865500LC	-0.512482	0.0587373	0.983941	0.996296
MergePeak_742	TraesCS1A03G0866200	-0.258555	0.0336616	0.139497	0.670153
MergePeak_743	TraesCS1A03G0868700	-0.194425	0.11416	0.222221	0.844716
MergePeak_744	TraesCS1A03G0868900	0.239274	0.587468	0.727946	0.966504
MergePeak_745	TraesCS1A03G0868900	2.78299	0.587468	0.727946	0.966504
MergePeak_746	TraesCS1A03G0869500	0.559449	0.519885	0.836304	0.973953
MergePeak_747	TraesCS1A03G0869500	0.216571	0.519885	0.836304	0.973953
MergePeak_748	TraesCS1A03G0869500	-0.199981	0.519885	0.836304	0.973953
MergePeak_749	TraesCS1A03G0869800	0.156832	0.489525	0.972886	0.996296
MergePeak_750	TraesCS1A03G0869900	1.75873	2.25556	1.03913e-07	5.3422e-06
MergePeak_751	TraesCS1A03G0870900	-0.808298	0.00923821	0.324826	0.966504
MergePeak_752	TraesCS1A03G0871500	0.956508	0.782409	0.212991	0.830168
MergePeak_753	TraesCS1A03G0873200	0.650885	0.705414	0.428759	0.966504
MergePeak_754	TraesCS1A03G0874000	-2.20455	-0.890763	0.00495832	0.0612553
MergePeak_755	TraesCS1A03G0874100	-1.53898	0.227568	0.346277	0.966504
MergePeak_756	TraesCS1A03G0874200LC	-1.39465	0.815169	0.218824	0.839766
MergePeak_757	TraesCS1A03G0874200LC	0.209932	0.815169	0.218824	0.839766
MergePeak_758	TraesCS1A03G0874600	0.298798	0.524469	0.908712	0.990077
MergePeak_759	TraesCS1A03G0874700	0.355318	0.551323	0.798542	0.967066
MergePeak_760	TraesCS1A03G0876000	-0.0158978	0.411135	0.818678	0.971533
MergePeak_761	TraesCS1A03G0879700	1.47921	0.542182	0.439124	0.966504
MergePeak_762	TraesCS1A03G0879800	0.209625	0.241215	0.429999	0.966504
MergePeak_762	TraesCS1A03G0879900LC	0.209625	0	1	1
MergePeak_763	TraesCS1A03G0880000	-0.256649	0.388605	0.606927	0.966504
MergePeak_764	TraesCS1A03G0880000	0.54717	0.388605	0.606927	0.966504
MergePeak_765	TraesCS1A03G0881300	0.835167	0.591511	0.660426	0.966504
MergePeak_766	TraesCS1A03G0881400	1.08898	0.631488	0.434546	0.966504
MergePeak_767	TraesCS1A03G0881700	1.2702	0.41262	0.929449	0.996136
MergePeak_768	TraesCS1A03G0882700	0.798592	0.503876	0.84284	0.976159
MergePeak_769	TraesCS1A03G0884800	-0.892178	-0.87817	5.39007e-05	0.00135941
MergePeak_770	TraesCS1A03G0885500	0.598975	1.05541	0.049255	0.350235
MergePeak_771	TraesCS1A03G0885600	-0.00936606	0.328046	0.928033	0.995928
MergePeak_772	TraesCS1A03G0885700	0.578824	0.205853	0.388894	0.966504
MergePeak_773	TraesCS1A03G0886300	2.00724	1.00535	0.104644	0.570404
MergePeak_774	TraesCS1A03G0887700	-0.140908	0.33822	0.524183	0.966504
MergePeak_775	TraesCS1A03G0888500	-0.569748	0.807077	0.153563	0.705655
MergePeak_776	TraesCS1A03G0889200	2.56106	0.36654	0.748881	0.966504
MergePeak_777	TraesCS1A03G0889400	-1.07701	0.134085	0.491385	0.966504
MergePeak_778	TraesCS1A03G0891800	-0.380689	0.697325	0.382747	0.966504
MergePeak_779	TraesCS1A03G0891900	0.90517	0.227905	0.575943	0.966504
MergePeak_780	TraesCS1A03G0895300	-0.429371	0.0676812	0.293377	0.944038
MergePeak_781	TraesCS1A03G0896900	0.353714	0.917524	0.0649865	0.422772
MergePeak_782	TraesCS1A03G0897000	-0.263274	0.292677	0.288156	0.936461
MergePeak_783	TraesCS1A03G0897000	-1.19437	0.292677	0.288156	0.936461
MergePeak_784	TraesCS1A03G0898900	0.429163	0.846651	0.196297	0.797589
MergePeak_785	TraesCS1A03G0899300	0.757558	0.46516	0.922847	0.995207
MergePeak_786	TraesCS1A03G0899400	4.11329	1.27679	0.00196114	0.0285987
MergePeak_787	TraesCS1A03G0900000	0.32689	0.604297	0.617479	0.966504
MergePeak_788	TraesCS1A03G0902700	0.818527	0.282529	0.700563	0.966504
MergePeak_789	TraesCS1A03G0903700	1.60845	0.948899	0.0205941	0.186042
MergePeak_790	TraesCS1A03G0906100	-0.393661	0.248654	0.551278	0.966504
MergePeak_791	TraesCS1A03G0910500LC	-1.1544	0	1	1
MergePeak_792	TraesCS1A03G0910800	0.154124	0.158308	0.132196	0.651018
MergePeak_793	TraesCS1A03G0910800	-2.04489	0.158308	0.132196	0.651018
MergePeak_794	TraesCS1A03G0910900	-0.501445	0.545312	0.75247	0.966504
MergePeak_795	TraesCS1A03G0910900	0.671643	0.545312	0.75247	0.966504
MergePeak_796	TraesCS1A03G0911100	0.391963	0.375908	0.672192	0.966504
MergePeak_797	TraesCS1A03G0914100	0.557125	0.832496	0.140901	0.673811
MergePeak_798	TraesCS1A03G0914100	-0.149732	0.832496	0.140901	0.673811
MergePeak_799	TraesCS1A03G0916800	-0.423276	0.702853	0.376928	0.966504
MergePeak_800	TraesCS1A03G0917300	0.136869	0.33137	0.758697	0.966504
MergePeak_801	TraesCS1A03G0917900	-0.72592	0.599188	0.703886	0.966504
MergePeak_802	TraesCS1A03G0919900	-0.913954	-0.222392	0.0919297	0.527218
MergePeak_803	TraesCS1A03G0920500	0.0137762	0.464958	0.843525	0.976237
MergePeak_804	TraesCS1A03G0920500	-0.00550156	0.464958	0.843525	0.976237
MergePeak_805	TraesCS1A03G0920800	0.993988	1.59762	0.000172306	0.00369379
MergePeak_806	TraesCS1A03G0927400	1.38625	0.832508	0.261319	0.903644
MergePeak_807	TraesCS1A03G0936500	0.4316	1.01055	0.0293958	0.242854
MergePeak_808	TraesCS1A03G0940900	-0.0221371	0.295074	0.478449	0.966504
MergePeak_809	TraesCS1A03G0945000	0.00760926	0.513334	0.904485	0.988594
MergePeak_809	TraesCS1A03G0945100	0.00760926	0.605733	0.559623	0.966504
MergePeak_810	TraesCS1A03G0945100	2.9719	0.605733	0.559623	0.966504
MergePeak_811	TraesCS1A03G0946300	1.30372	0.452107	0.972437	0.996296
MergePeak_812	TraesCS1A03G0947000	-0.0747882	0.392692	0.853978	0.976999
MergePeak_813	TraesCS1A03G0949800	-0.0178786	0.942977	0.0681564	0.436154
MergePeak_813	TraesCS1A03G0949900LC	-0.0178786	0.589067	0.744453	0.966504
MergePeak_814	TraesCS1A03G0950000	-0.716101	0.289641	0.968719	0.996296
MergePeak_815	TraesCS1A03G0954600	0.869164	0.466571	0.963803	0.996296
MergePeak_816	TraesCS1A03G0955000	-2.00296	-1.57446	1.56577e-11	1.84552e-09
MergePeak_817	TraesCS1A03G0956200	-0.364374	0.591275	0.770296	0.966504
MergePeak_818	TraesCS1A03G0958900	-2.07395	-0.117204	0.448587	0.966504
MergePeak_819	TraesCS1A03G0964300	0.198222	0.609097	0.528317	0.966504
MergePeak_820	TraesCS1A03G0966000	-0.392643	0.437458	0.839979	0.975631
MergePeak_821	TraesCS1A03G0967800	0.651736	0.57497	0.642859	0.966504
MergePeak_822	TraesCS1A03G0968200	-0.246397	0.339536	0.468178	0.966504
MergePeak_823	TraesCS1A03G0968400	-0.980397	-0.767456	0.000210116	0.00438513
MergePeak_824	TraesCS1A03G0968800LC	0.561541	0.617353	0.846355	0.976568
MergePeak_825	TraesCS1A03G0969400	-0.974745	0.148653	0.190447	0.786768
MergePeak_826	TraesCS1A03G0969400	-0.405933	0.148653	0.190447	0.786768
MergePeak_827	TraesCS1A03G0969900	-0.738444	0.688185	0.536307	0.966504
MergePeak_828	TraesCS1A03G0969900	0.135451	0.688185	0.536307	0.966504
MergePeak_829	TraesCS1A03G0972300	0.213169	0.567118	0.497539	0.966504
MergePeak_830	TraesCS1A03G0974300	2.72414	0.365061	0.888226	0.983443
MergePeak_831	TraesCS1A03G0974500	0.385834	0.604604	0.705134	0.966504
MergePeak_832	TraesCS1A03G0974500	0.922782	0.604604	0.705134	0.966504
MergePeak_833	TraesCS1A03G0975700	-0.0999014	0.35419	0.552599	0.966504
MergePeak_834	TraesCS1A03G0975700	-0.0121676	0.35419	0.552599	0.966504
MergePeak_835	TraesCS1A03G0975800	0.891681	0.478266	0.936104	0.996296
MergePeak_836	TraesCS1A03G0977000	-0.806749	-0.178193	0.17985	0.764362
MergePeak_837	TraesCS1A03G0982700	0.972814	3.3286	7.28983e-24	4.23439e-21
MergePeak_838	TraesCS1A03G0983600	-1.64081	0.376219	0.895754	0.986028
MergePeak_839	TraesCS1A03G0986200	2.21185	0.415888	0.960354	0.996296
MergePeak_840	TraesCS1A03G0986300	-0.0520287	0.536787	0.890138	0.984303
MergePeak_841	TraesCS1A03G0986300	-0.171823	0.536787	0.890138	0.984303
MergePeak_842	TraesCS1A03G0986900	-2.36023	-1.55967	4.25475e-17	1.24315e-14
MergePeak_842	TraesCS1A03G0987000LC	-2.36023	-1.47495	2.31471e-09	1.71271e-07
MergePeak_843	TraesCS1A03G0987600	0.900106	0.602381	0.691616	0.966504
MergePeak_844	TraesCS1A03G0987800	0.810191	0.499632	0.685801	0.966504
MergePeak_845	TraesCS1A03G0988100	-4.36266	-3.34386	6.03111e-49	3.07917e-45
MergePeak_846	TraesCS1A03G0990000	0.511384	1.37262	7.05194e-05	0.00171962
MergePeak_847	TraesCS1A03G0995700	0.291262	1.12341	0.0121216	0.124771
MergePeak_848	TraesCS1A03G1001000	2.94467	0.482334	0.852002	0.976999
MergePeak_849	TraesCS1A03G1004700	1.88723	0.677111	0.42481	0.966504
MergePeak_850	TraesCS1A03G1005700	0.732333	1.91556	7.99632e-06	0.000253124
MergePeak_851	TraesCS1A03G1006500	-0.904247	-0.149668	0.00152545	0.0232555
MergePeak_852	TraesCS1A03G1006500	-0.297643	-0.149668	0.00152545	0.0232555
MergePeak_853	TraesCS1A03G1008400	-0.049821	0.318044	0.466229	0.966504
MergePeak_854	TraesCS1A03G1008600	-0.212385	0.31796	0.36356	0.966504
MergePeak_855	TraesCS1A03G1009400	0.333079	0.266904	0.484342	0.966504
MergePeak_856	TraesCS1A03G1010500	-1.94841	1.11863	0.0208478	0.18779
MergePeak_857	TraesCS1A03G1011400	0.153459	0.81168	0.257037	0.900197
MergePeak_858	TraesCS1A03G1014100	-0.108171	-0.552891	0.00183387	0.0270889
MergePeak_859	TraesCS1A03G1015700	0.242182	0.656726	0.537766	0.966504
MergePeak_860	TraesCS1A03G1015800	1.89154	1.35161	0.0431648	0.31928
MergePeak_861	TraesCS1A03G1016500LC	1.185	0	1	1
MergePeak_862	TraesCS1A03G1017300	0.78526	0.751953	0.409404	0.966504
MergePeak_863	TraesCS1A03G1017300	0.491461	0.751953	0.409404	0.966504
MergePeak_864	TraesCS1A03G1018800	1.47538	0.60367	0.416601	0.966504
MergePeak_865	TraesCS1A03G1018800	1.39144	0.60367	0.416601	0.966504
MergePeak_866	TraesCS1A03G1020700	0.513197	0.804772	0.18875	0.78273
MergePeak_867	TraesCS1A03G1024200	-1.16904	0.846823	0.0481583	0.345222
MergePeak_868	TraesCS1A03G1025400	1.43272	-0.391014	0.104139	0.568546
MergePeak_869	TraesCS1A03G1025400	2.57895	-0.391014	0.104139	0.568546
MergePeak_870	TraesCS1A03G1025600	-0.580339	0.540301	0.823536	0.972861
MergePeak_871	TraesCS1A03G1026800	0.231183	1.118	0.00986966	0.106212
MergePeak_872	TraesCS1A03G1027100	0.297338	0.34578	0.807023	0.967984
MergePeak_873	TraesCS1A03G1027700	2.3652	0.287744	0.786282	0.966504
MergePeak_874	TraesCS1A03G1029500	-0.377992	0.653844	0.446596	0.966504
MergePeak_875	TraesCS1A03G1029800	-0.648691	0.403764	0.761771	0.966504
MergePeak_876	TraesCS1A03G1031600	0.183061	1.0036	0.0389572	0.297443
MergePeak_877	TraesCS1A03G1033000	0.482588	1.10851	0.011748	0.121661
MergePeak_878	TraesCS1A03G1034200LC	-0.164125	-0.0772072	0.769379	0.966504
MergePeak_878	TraesCS1A03G1034300LC	-0.164125	-0.459652	0.427698	0.966504
MergePeak_879	TraesCS1A03G1034500	0.64552	0.404869	0.719454	0.966504
MergePeak_880	TraesCS1A03G1035600	-0.459768	0.634374	0.537809	0.966504
MergePeak_881	TraesCS1A03G1035600	0.818537	0.634374	0.537809	0.966504
MergePeak_882	TraesCS1A03G1035600	0.564176	0.634374	0.537809	0.966504
MergePeak_883	TraesCS1A03G1039300	0.527861	0.741191	0.322256	0.966504
MergePeak_884	TraesCS1A03G1039300	0.427657	0.741191	0.322256	0.966504
MergePeak_885	TraesCS1A03G1039400	-0.00662865	0.263907	0.399383	0.966504
MergePeak_886	TraesCS1A03G1043200	0.633419	0.60527	0.671763	0.966504
MergePeak_887	TraesCS1A03G1044100	0.319564	0.721091	0.331642	0.966504
MergePeak_888	TraesCS1A03G1045900	3.39152	0.387349	0.981047	0.996296
MergePeak_889	TraesCS1A03G1046900	0.111912	0.289089	0.544729	0.966504
MergePeak_890	TraesCS1A03G1048500	-0.747898	-0.286515	0.0521598	0.364795
MergePeak_891	TraesCS1A03G1050000	-1.55362	-0.990123	1.74533e-07	8.43989e-06
MergePeak_892	TraesCS1A03G1052000	0.360222	0.411439	0.992669	0.997287
MergePeak_893	TraesCS1A03G1052100	-3.69846	0.47203	0.966388	0.996296
MergePeak_894	TraesCS1A03G1061900	-0.0428618	0.164495	0.400068	0.966504
MergePeak_895	TraesCS1A03G1062100	-0.483043	0.0236876	0.0584062	0.393748
MergePeak_896	TraesCS1A03G1065900	0.851192	0.561088	0.71842	0.966504
MergePeak_897	TraesCS1A03G1067100	2.96799	0.695943	0.510375	0.966504
MergePeak_898	TraesCS1A03G1067100	0.188683	0.695943	0.510375	0.966504
MergePeak_899	TraesCS1A03G1067600LC	0.362228	0.452167	0.839584	0.975474
MergePeak_900	TraesCS1A03G1068000	-0.337258	0.349726	0.678723	0.966504
MergePeak_901	TraesCS1A03G1068000	0.278243	0.349726	0.678723	0.966504
MergePeak_902	TraesCS1A03G1071000	0.140601	0.79821	0.208972	0.823361
MergePeak_903	TraesCS1A03G1072700	-2.56641	-0.118827	0.591525	0.966504
MergePeak_904	TraesCS1A03G1074800	0.439164	0.6939	0.425877	0.966504
MergePeak_905	TraesCS1A03G1076000LC	-2.13093	-0.748057	0.103219	0.56524
MergePeak_906	TraesCS1A03G1076200	-0.278715	0.341422	0.502606	0.966504
MergePeak_907	TraesCS1A03G1077100	0.0136281	0.828324	0.139245	0.66941
MergePeak_908	TraesCS1A03G1079400	-0.176814	0.774946	0.175906	0.756053
MergePeak_909	TraesCS1A03G1079700	0.666142	0.714886	0.377205	0.966504
MergePeak_910	TraesCS1A03G1079700	0.547115	0.714886	0.377205	0.966504
MergePeak_911	TraesCS1A03G1080600	0.853734	0.109344	0.217888	0.838033
MergePeak_912	TraesCS1A03G1080900	0.264282	0.442718	0.843172	0.976198
MergePeak_913	TraesCS1A03G1081200	1.17067	0.291724	0.998904	0.999553
MergePeak_914	TraesCS1A03G1082100	2.55273	-0.0503767	0.703555	0.966504
MergePeak_915	TraesCS1A03G1084700	-0.267838	0.260299	0.489554	0.966504
MergePeak_916	TraesCS1A03G1085100	0.557224	0.229397	0.68652	0.966504
MergePeak_917	TraesCS1A03G1086000	0.0637662	0.259106	0.319569	0.966504
MergePeak_918	TraesCS1A03G1086000	-1.96817	0.259106	0.319569	0.966504
MergePeak_919	TraesCS1B03G0001600	-3.50619	-1.74679	5.7584e-08	3.17379e-06
MergePeak_919	TraesCS1B03G0001700LC	-3.50619	0	1	1
MergePeak_920	TraesCS1B03G0001600	-1.34363	-1.74679	5.7584e-08	3.17379e-06
MergePeak_921	TraesCS1B03G0002000	0.671776	0.232498	0.437581	0.966504
MergePeak_922	TraesCS1B03G0002200	-0.128887	-0.0428174	0.128862	0.642004
MergePeak_923	TraesCS1B03G0002200	2.35767	-0.0428174	0.128862	0.642004
MergePeak_924	TraesCS1B03G0002400	0.981962	0.581758	0.785818	0.966504
MergePeak_925	TraesCS1B03G0003100	-0.322239	0.566157	0.753205	0.966504
MergePeak_926	TraesCS1B03G0003300	2.94174	1.54901	2.40313e-06	8.80337e-05
MergePeak_927	TraesCS1B03G0015900	-0.422625	0.888363	0.122507	0.624432
MergePeak_928	TraesCS1B03G0016200	3.00246	0.676131	0.590331	0.966504
MergePeak_929	TraesCS1B03G0020700	-0.198056	-0.335	0.00017251	0.00369733
MergePeak_930	TraesCS1B03G0027900	-1.72595	0.129343	0.283355	0.929354
MergePeak_931	TraesCS1B03G0028000	-0.447986	0.64685	0.534746	0.966504
MergePeak_932	TraesCS1B03G0036800	0.591545	0.900737	0.0580131	0.391836
MergePeak_933	TraesCS1B03G0038800	-0.292799	1.40471	0.000377876	0.00723416
MergePeak_934	TraesCS1B03G0042600	1.08936	1.11435	0.0184174	0.170963
MergePeak_935	TraesCS1B03G0045000	0.215791	0.209907	0.18313	0.770654
MergePeak_936	TraesCS1B03G0048700	-0.739918	0.170345	0.721422	0.966504
MergePeak_937	TraesCS1B03G0048800	0.304516	0.688242	0.423856	0.966504
MergePeak_938	TraesCS1B03G0048900	0.151837	0.304641	0.974046	0.996296
MergePeak_939	TraesCS1B03G0061700LC	0.0221292	-0.165426	0.22019	0.840729
MergePeak_940	TraesCS1B03G0061900	-0.212212	0.964223	0.0399445	0.302292
MergePeak_941	TraesCS1B03G0062200LC	-0.721765	-0.0172393	0.310414	0.963601
MergePeak_942	TraesCS1B03G0062400	-0.527415	-0.0988756	0.0694819	0.441708
MergePeak_943	TraesCS1B03G0073000	-1.46728	0.475227	0.842714	0.976149
MergePeak_944	TraesCS1B03G0073000	-0.953053	0.475227	0.842714	0.976149
MergePeak_945	TraesCS1B03G0074200LC	-1.59032	-1.55228	9.78838e-12	1.20633e-09
MergePeak_946	TraesCS1B03G0075200	0.561501	0.263649	0.75923	0.966504
MergePeak_947	TraesCS1B03G0075600	0.554465	-0.119426	0.07127	0.448781
MergePeak_948	TraesCS1B03G0084600	0.278028	0.296225	0.484433	0.966504
MergePeak_949	TraesCS1B03G0084700	0.564141	0.67146	0.465965	0.966504
MergePeak_950	TraesCS1B03G0085000	-0.491322	0.23295	0.245283	0.883005
MergePeak_951	TraesCS1B03G0093600	-0.270597	0.38254	0.604547	0.966504
MergePeak_952	TraesCS1B03G0093700	0.434464	0.294796	0.749178	0.966504
MergePeak_953	TraesCS1B03G0096900	0.165728	0.147305	0.629452	0.966504
MergePeak_954	TraesCS1B03G0099700	-0.0214918	0.488021	0.898758	0.987194
MergePeak_954	TraesCS1B03G0099800LC	-0.0214918	0	1	1
MergePeak_955	TraesCS1B03G0099700	0.748164	0.488021	0.898758	0.987194
MergePeak_955	TraesCS1B03G0099800LC	0.748164	0	1	1
MergePeak_956	TraesCS1B03G0101300	1.92609	0.110873	0.194482	0.79344
MergePeak_957	TraesCS1B03G0109200	-0.00233011	0.131832	0.145711	0.686746
MergePeak_958	TraesCS1B03G0109900	1.2353	0.540415	0.354825	0.966504
MergePeak_959	TraesCS1B03G0116100	-0.0370453	0.620735	0.57531	0.966504
MergePeak_960	TraesCS1B03G0117900	0.0679609	0.35087	0.613434	0.966504
MergePeak_961	TraesCS1B03G0120000LC	-2.8632	0.343879	0.929015	0.996098
MergePeak_962	TraesCS1B03G0121100	0.701222	0.238405	0.737166	0.966504
MergePeak_963	TraesCS1B03G0121100	0.829269	0.238405	0.737166	0.966504
MergePeak_964	TraesCS1B03G0121200	-0.0268627	0.157801	0.10065	0.55686
MergePeak_965	TraesCS1B03G0121200	-0.584332	0.157801	0.10065	0.55686
MergePeak_966	TraesCS1B03G0121900	0.498499	0.308282	0.741871	0.966504
MergePeak_967	TraesCS1B03G0128900	0.966184	0.296941	0.678177	0.966504
MergePeak_968	TraesCS1B03G0131000	-0.0896185	0.269894	0.363728	0.966504
MergePeak_969	TraesCS1B03G0134900	0.374035	-1.14142	4.19612e-06	0.000144532
MergePeak_970	TraesCS1B03G0136000	0.450799	0.419787	0.937207	0.996296
MergePeak_971	TraesCS1B03G0138600	-0.70249	0.217132	0.322627	0.966504
MergePeak_972	TraesCS1B03G0139900	-0.900025	0.0169069	0.0575481	0.389832
MergePeak_973	TraesCS1B03G0141200	2.66846	0.811799	0.250516	0.889172
MergePeak_974	TraesCS1B03G0142800	0.936933	0.378891	0.876037	0.98219
MergePeak_975	TraesCS1B03G0142900	-1.12753	-0.574693	5.61751e-05	0.00140806
MergePeak_976	TraesCS1B03G0143700	0.317714	0.583314	0.620231	0.966504
MergePeak_977	TraesCS1B03G0143900	2.2537	0.459927	0.913189	0.991698
MergePeak_978	TraesCS1B03G0143900	0.545658	0.459927	0.913189	0.991698
MergePeak_979	TraesCS1B03G0147400LC	0.333885	0	1	1
MergePeak_979	TraesCS1B03G0147500	0.333885	0.627392	0.603756	0.966504
MergePeak_980	TraesCS1B03G0152600	1.81574	2.32344	3.99475e-10	3.47852e-08
MergePeak_981	TraesCS1B03G0155900	3.0526	0.871584	0.237408	0.872164
MergePeak_982	TraesCS1B03G0163900LC	-0.68267	-0.196504	0.146083	0.687763
MergePeak_983	TraesCS1B03G0173000	0.014389	0.590572	0.730575	0.966504
MergePeak_984	TraesCS1B03G0173600	-0.214067	0.685967	0.377551	0.966504
MergePeak_985	TraesCS1B03G0174000	-0.0131454	0.228675	0.937191	0.996296
MergePeak_986	TraesCS1B03G0176400	-1.14592	-0.0554859	0.334952	0.966504
MergePeak_987	TraesCS1B03G0176700	0.504761	0.517773	0.7182	0.966504
MergePeak_988	TraesCS1B03G0176700	3.89529	0.517773	0.7182	0.966504
MergePeak_989	TraesCS1B03G0181700	-2.15171	0.290422	0.72395	0.966504
MergePeak_990	TraesCS1B03G0182400	0.421165	0.483235	0.759556	0.966504
MergePeak_991	TraesCS1B03G0183800	-0.49899	-0.142804	0.0667378	0.430241
MergePeak_992	TraesCS1B03G0187700	-2.08946	-0.0228019	0.395729	0.966504
MergePeak_993	TraesCS1B03G0190500	-3.31557	-2.24508	5.72175e-05	0.00143013
MergePeak_994	TraesCS1B03G0192900	1.1422	1.32538	0.000221369	0.00459134
MergePeak_995	TraesCS1B03G0198100	0.409488	0.523587	0.769201	0.966504
MergePeak_996	TraesCS1B03G0199400	0.622667	0.269381	0.612434	0.966504
MergePeak_997	TraesCS1B03G0202500	-0.129259	0.2787	0.648585	0.966504
MergePeak_998	TraesCS1B03G0202700	2.91315	1.20928	0.00619705	0.0733544
MergePeak_999	TraesCS1B03G0202700	0.25043	1.20928	0.00619705	0.0733544
MergePeak_1000	TraesCS1B03G0203300	-0.572947	0.13013	0.73359	0.966504
MergePeak_1001	TraesCS1B03G0204400	2.10515	0.517415	0.162441	0.725966
MergePeak_1002	TraesCS1B03G0212900	1.53279	1.79591	1.3359e-05	0.000397266
MergePeak_1003	TraesCS1B03G0213800	0.0274761	0.549773	0.440531	0.966504
MergePeak_1004	TraesCS1B03G0216600	-0.584734	0.313527	0.881091	0.983326
MergePeak_1005	TraesCS1B03G0217600	0.871033	1.62749	1.632e-06	6.24744e-05
MergePeak_1006	TraesCS1B03G0217600	4.38289	1.62749	1.632e-06	6.24744e-05
MergePeak_1007	TraesCS1B03G0218600	-0.228663	0.673643	0.0767023	0.471553
MergePeak_1008	TraesCS1B03G0219600LC	0.20263	-0.103444	0.128002	0.639474
MergePeak_1009	TraesCS1B03G0229300	0.155817	0.9132	0.186267	0.777313
MergePeak_1010	TraesCS1B03G0230600	0.905644	0.208847	0.622736	0.966504
MergePeak_1011	TraesCS1B03G0232900	1.94172	0.431622	0.218469	0.839109
MergePeak_1012	TraesCS1B03G0238600	0.63578	0.592403	0.465254	0.966504
MergePeak_1013	TraesCS1B03G0239000	-0.494709	-0.315157	0.0148559	0.145505
MergePeak_1014	TraesCS1B03G0239600	-0.540428	0.0248731	0.0572942	0.388492
MergePeak_1015	TraesCS1B03G0239900	1.16559	0.683895	0.434157	0.966504
MergePeak_1016	TraesCS1B03G0241000	-0.50703	1.01283	0.0143739	0.142046
MergePeak_1017	TraesCS1B03G0244600	0.198092	0.48611	0.866085	0.979332
MergePeak_1018	TraesCS1B03G0245000	-1.42324	0.84414	0.146524	0.688734
MergePeak_1019	TraesCS1B03G0249100	-0.50754	0.256058	0.717017	0.966504
MergePeak_1020	TraesCS1B03G0251400LC	0.13859	0.197236	0.761039	0.966504
MergePeak_1021	TraesCS1B03G0252800	0.355666	0.649084	0.650118	0.966504
MergePeak_1022	TraesCS1B03G0255400	-0.407812	0.178477	0.129291	0.642835
MergePeak_1023	TraesCS1B03G0256200LC	0.10853	-0.0547275	0.803325	0.967512
MergePeak_1024	TraesCS1B03G0256400	-0.420823	0.0241987	0.65177	0.966504
MergePeak_1025	TraesCS1B03G0257900LC	-0.364224	-0.0357731	0.0511572	0.359859
MergePeak_1026	TraesCS1B03G0258800	-0.520159	0.236647	0.560557	0.966504
MergePeak_1027	TraesCS1B03G0260800	2.45902	1.89044	1.10546e-07	5.64985e-06
MergePeak_1028	TraesCS1B03G0264600	-0.000215798	1.54544	1.53311e-05	0.00044957
MergePeak_1029	TraesCS1B03G0266000	-0.650801	0.119663	0.0894658	0.517621
MergePeak_1030	TraesCS1B03G0267200	0.707403	1.23248	0.00124365	0.0197025
MergePeak_1031	TraesCS1B03G0267900	-1.41093	0.926232	0.15295	0.704107
MergePeak_1032	TraesCS1B03G0269500	1.07435	1.08538	0.00885766	0.0975509
MergePeak_1033	TraesCS1B03G0269600	-0.716434	0.174505	0.367583	0.966504
MergePeak_1034	TraesCS1B03G0271000	0.92149	0.771572	0.317387	0.966504
MergePeak_1035	TraesCS1B03G0271700	0.48473	0.451973	0.993434	0.997465
MergePeak_1036	TraesCS1B03G0271700	2.21015	0.451973	0.993434	0.997465
MergePeak_1037	TraesCS1B03G0273400	-0.107654	0.706783	0.530489	0.966504
MergePeak_1038	TraesCS1B03G0273800	0.084233	0.424513	0.909648	0.990213
MergePeak_1039	TraesCS1B03G0274600	2.61877	0.846612	0.337264	0.966504
MergePeak_1040	TraesCS1B03G0274800	-0.312232	0.148252	0.302978	0.955618
MergePeak_1041	TraesCS1B03G0275400	2.67782	-0.18787	0.0245236	0.21223
MergePeak_1042	TraesCS1B03G0275700	0.501967	0.744117	0.26512	0.909696
MergePeak_1043	TraesCS1B03G0279400LC	1.1254	0.370894	0.797064	0.966742
MergePeak_1044	TraesCS1B03G0280300	-0.286531	0.292876	0.994622	0.997873
MergePeak_1044	TraesCS1B03G0280400	-0.286531	0.313363	0.426987	0.966504
MergePeak_1045	TraesCS1B03G0280500	0.269522	-0.343835	0.000114	0.00259102
MergePeak_1046	TraesCS1B03G0280500	0.48073	-0.343835	0.000114	0.00259102
MergePeak_1047	TraesCS1B03G0281600	0.490811	0.372769	0.626019	0.966504
MergePeak_1048	TraesCS1B03G0282900	-0.237062	0.242753	0.358698	0.966504
MergePeak_1049	TraesCS1B03G0283000	-0.470488	0.522597	0.812314	0.968635
MergePeak_1050	TraesCS1B03G0283100	-1.992	0.72213	0.354075	0.966504
MergePeak_1051	TraesCS1B03G0283100	0.509948	0.72213	0.354075	0.966504
MergePeak_1052	TraesCS1B03G0283100	1.34388	0.72213	0.354075	0.966504
MergePeak_1053	TraesCS1B03G0288200	-0.538343	0.62382	0.472383	0.966504
MergePeak_1054	TraesCS1B03G0288400	0.530074	0.367719	0.949643	0.996296
MergePeak_1055	TraesCS1B03G0288600	1.43061	0.766641	0.295662	0.947088
MergePeak_1056	TraesCS1B03G0288700	1.01623	0.289808	0.691435	0.966504
MergePeak_1057	TraesCS1B03G0290400	0.728172	0.887841	0.141968	0.676796
MergePeak_1058	TraesCS1B03G0295400LC	0.933107	-0.0671522	0.205942	0.817199
MergePeak_1059	TraesCS1B03G0298000	-1.38296	-0.797891	5.32615e-06	0.000178527
MergePeak_1060	TraesCS1B03G0306100	0.741939	0.518438	0.888148	0.983413
MergePeak_1061	TraesCS1B03G0307100LC	0.52082	0.390204	0.950297	0.996296
MergePeak_1061	TraesCS1B03G0307200	0.52082	0.111031	1	1
MergePeak_1062	TraesCS1B03G0316100	0.168621	0.198051	0.460476	0.966504
MergePeak_1063	TraesCS1B03G0320200	0.604592	0.825834	0.152673	0.703355
MergePeak_1064	TraesCS1B03G0321200	0.175812	0.555059	0.80679	0.967984
MergePeak_1065	TraesCS1B03G0321300	-0.908017	0.773103	0.243204	0.879487
MergePeak_1066	TraesCS1B03G0322100	-0.302184	0.427499	0.857104	0.976999
MergePeak_1067	TraesCS1B03G0323800	-0.344379	0.425285	0.691033	0.966504
MergePeak_1068	TraesCS1B03G0326400	2.16417	0.559664	0.847333	0.976845
MergePeak_1069	TraesCS1B03G0326500LC	-0.425174	0.603909	0.482821	0.966504
MergePeak_1070	TraesCS1B03G0326800	-0.11939	0.58612	0.782852	0.966504
MergePeak_1071	TraesCS1B03G0328700LC	1.97264	-0.205771	0.385218	0.966504
MergePeak_1072	TraesCS1B03G0334900	0.589297	1.26015	0.000339372	0.00659832
MergePeak_1073	TraesCS1B03G0335100	2.82368	0.495505	0.313563	0.966504
MergePeak_1074	TraesCS1B03G0335300	0.163265	0.902892	0.0739368	0.459754
MergePeak_1075	TraesCS1B03G0335700	-0.372144	0.304082	0.444996	0.966504
MergePeak_1076	TraesCS1B03G0336700	0.368013	0.854383	0.0688858	0.438925
MergePeak_1077	TraesCS1B03G0337900	-0.769147	-0.347719	0.000113931	0.00259004
MergePeak_1078	TraesCS1B03G0337900	0.119701	-0.347719	0.000113931	0.00259004
MergePeak_1079	TraesCS1B03G0340300	0.00409526	0.753649	0.184889	0.775364
MergePeak_1080	TraesCS1B03G0340400	-0.790222	0.585309	0.657577	0.966504
MergePeak_1081	TraesCS1B03G0341500	0.244295	0.897405	0.0816915	0.49101
MergePeak_1082	TraesCS1B03G0343800	0.416679	1.07885	0.0212612	0.190595
MergePeak_1083	TraesCS1B03G0344300	-0.293353	0.356234	0.720476	0.966504
MergePeak_1084	TraesCS1B03G0344400	0.631537	0.834107	0.185914	0.776551
MergePeak_1085	TraesCS1B03G0344500	-0.270238	0.18776	0.548221	0.966504
MergePeak_1086	TraesCS1B03G0345000	0.0199735	-0.109005	0.0146608	0.144176
MergePeak_1087	TraesCS1B03G0346000	0.00449689	1.75268	6.35456e-07	2.70003e-05
MergePeak_1088	TraesCS1B03G0346300	-0.827866	0.753349	0.291173	0.940865
MergePeak_1089	TraesCS1B03G0347100	0.742913	-0.00437844	0.293449	0.944198
MergePeak_1090	TraesCS1B03G0347500	1.08571	0.64448	0.610038	0.966504
MergePeak_1091	TraesCS1B03G0348500	-1.29567	-1.23508	0.0053594	0.0653941
MergePeak_1092	TraesCS1B03G0349200LC	-0.362127	0.387722	0.882805	0.983326
MergePeak_1093	TraesCS1B03G0349500	0.920687	1.45624	3.71852e-05	0.000982062
MergePeak_1094	TraesCS1B03G0349900LC	-0.162104	0	1	1
MergePeak_1095	TraesCS1B03G0350100	0.624957	0.420958	0.76983	0.966504
MergePeak_1096	TraesCS1B03G0350500	0.116076	0.925586	0.0949338	0.53731
MergePeak_1097	TraesCS1B03G0351100	0.235855	0.649203	0.481647	0.966504
MergePeak_1098	TraesCS1B03G0352100	0.673364	0.176436	0.370389	0.966504
MergePeak_1099	TraesCS1B03G0354200	1.1319	0.450829	0.966077	0.996296
MergePeak_1100	TraesCS1B03G0355400	-2.16439	-1.13294	4.23935e-08	2.41193e-06
MergePeak_1101	TraesCS1B03G0356000	0.278147	0.680256	0.482949	0.966504
MergePeak_1102	TraesCS1B03G0356800	-1.31233	0.672119	0.462125	0.966504
MergePeak_1103	TraesCS1B03G0359800	0.229221	0.467685	0.995864	0.998217
MergePeak_1104	TraesCS1B03G0360300	0.488893	0.247258	0.315158	0.966504
MergePeak_1105	TraesCS1B03G0360800	-0.492933	-0.0307545	0.105777	0.574381
MergePeak_1106	TraesCS1B03G0361500	0.467627	0.330962	0.67752	0.966504
MergePeak_1107	TraesCS1B03G0362200	-0.606663	1.13688	0.0432952	0.31979
MergePeak_1108	TraesCS1B03G0363500	3.22194	0.374794	0.92373	0.995361
MergePeak_1109	TraesCS1B03G0366100	-0.148194	0.167247	0.216895	0.836865
MergePeak_1110	TraesCS1B03G0366300	0.408888	0.513541	0.853479	0.976999
MergePeak_1111	TraesCS1B03G0368500	0.971486	0.954037	0.0406663	0.306178
MergePeak_1111	TraesCS1B03G0368600LC	0.971486	0.233764	0.827168	0.972861
MergePeak_1112	TraesCS1B03G0369400	-2.32099	0.293511	0.606055	0.966504
MergePeak_1113	TraesCS1B03G0370100	0.156454	0.201677	0.821289	0.971992
MergePeak_1114	TraesCS1B03G0370300	1.62166	0.493911	0.947662	0.996296
MergePeak_1115	TraesCS1B03G0370600	0.098071	-1.49782	4.05302e-12	5.28439e-10
MergePeak_1116	TraesCS1B03G0374000	0.903335	0.361077	0.655156	0.966504
MergePeak_1117	TraesCS1B03G0374000	-3.38408	0.361077	0.655156	0.966504
MergePeak_1118	TraesCS1B03G0374900	-0.377212	0.307728	0.671924	0.966504
MergePeak_1119	TraesCS1B03G0376500	-2.07299	0.42678	0.8224	0.972614
MergePeak_1120	TraesCS1B03G0380000	0.010171	1.08719	0.0152747	0.148593
MergePeak_1121	TraesCS1B03G0380400	0.271774	0.77323	0.210269	0.825975
MergePeak_1122	TraesCS1B03G0380400	-0.161418	0.77323	0.210269	0.825975
MergePeak_1123	TraesCS1B03G0382700	-1.75682	-0.205677	0.146515	0.688734
MergePeak_1124	TraesCS1B03G0383100	2.90386	0.515238	0.955892	0.996296
MergePeak_1125	TraesCS1B03G0383100	0.969702	0.515238	0.955892	0.996296
MergePeak_1126	TraesCS1B03G0383500	-0.0913347	0.496973	0.977965	0.996296
MergePeak_1127	TraesCS1B03G0384100	0.300036	0.525644	0.96203	0.996296
MergePeak_1128	TraesCS1B03G0384600	0.00694843	0.14083	0.272736	0.918673
MergePeak_1129	TraesCS1B03G0385200	0.61452	1.02688	0.0389458	0.297379
MergePeak_1130	TraesCS1B03G0385300	-0.100734	0.195502	0.187224	0.779328
MergePeak_1130	TraesCS1B03G0385400	-0.100734	0.729882	0.30443	0.955772
MergePeak_1131	TraesCS1B03G0385300	-0.118125	0.195502	0.187224	0.779328
MergePeak_1131	TraesCS1B03G0385500	-0.118125	0.0458099	0.0409858	0.307866
MergePeak_1132	TraesCS1B03G0385700	0.760953	0.659762	0.136402	0.662769
MergePeak_1133	TraesCS1B03G0387000	3.96475	1.71251	3.25418e-09	2.32451e-07
MergePeak_1134	TraesCS1B03G0388500	0.666024	1.02942	0.0257325	0.22012
MergePeak_1135	TraesCS1B03G0389200	0.556438	0.771468	0.314312	0.966504
MergePeak_1136	TraesCS1B03G0389400	0.801644	1.22118	0.000981653	0.0162112
MergePeak_1137	TraesCS1B03G0389900	0.150192	-0.408666	0.00927903	0.101306
MergePeak_1138	TraesCS1B03G0391700	3.2243	0.439609	0.928766	0.995994
MergePeak_1139	TraesCS1B03G0394400	-0.179379	0.321778	0.570582	0.966504
MergePeak_1140	TraesCS1B03G0394900	0.146548	0.528967	0.660434	0.966504
MergePeak_1141	TraesCS1B03G0395100	1.17843	0.833037	0.208866	0.823036
MergePeak_1142	TraesCS1B03G0395700LC	-3.41129	0.166021	0.299379	0.953383
MergePeak_1143	TraesCS1B03G0395700LC	-1.29602	0.166021	0.299379	0.953383
MergePeak_1144	TraesCS1B03G0397700	-0.153162	-0.124048	0.102663	0.563278
MergePeak_1145	TraesCS1B03G0398200	0.362703	0.713167	0.32339	0.966504
MergePeak_1146	TraesCS1B03G0399500	4.0739	0.0532305	0.0530774	0.368766
MergePeak_1147	TraesCS1B03G0400200	1.33042	0.558855	0.773452	0.966504
MergePeak_1148	TraesCS1B03G0400600LC	0.895128	-0.182118	0.0097475	0.105154
MergePeak_1149	TraesCS1B03G0401800	-0.736271	0.536122	0.782398	0.966504
MergePeak_1150	TraesCS1B03G0404400	-0.495485	0.648063	0.301283	0.954341
MergePeak_1151	TraesCS1B03G0407500LC	-1.04822	0.192645	0.85858	0.976999
MergePeak_1152	TraesCS1B03G0409100	0.494708	0.97699	0.124226	0.62966
MergePeak_1153	TraesCS1B03G0409100	1.95576	0.97699	0.124226	0.62966
MergePeak_1154	TraesCS1B03G0409100	1.5181	0.97699	0.124226	0.62966
MergePeak_1155	TraesCS1B03G0411500	0.860011	0.779392	0.205578	0.816402
MergePeak_1156	TraesCS1B03G0413100	0.519407	1.25549	0.000683636	0.0120158
MergePeak_1157	TraesCS1B03G0413600	-0.0953663	0.357863	0.48212	0.966504
MergePeak_1158	TraesCS1B03G0413700	0.769605	0.28073	0.851744	0.976999
MergePeak_1159	TraesCS1B03G0415700	0.305385	0.857902	0.123519	0.627224
MergePeak_1160	TraesCS1B03G0415700	0.17512	0.857902	0.123519	0.627224
MergePeak_1161	TraesCS1B03G0418900	0.151138	0.760496	0.235025	0.867738
MergePeak_1162	TraesCS1B03G0419200	0.612196	0.730333	0.374064	0.966504
MergePeak_1163	TraesCS1B03G0422000	0.503206	0.780786	0.210069	0.825737
MergePeak_1164	TraesCS1B03G0424000	0.365078	0.789008	0.136672	0.663617
MergePeak_1165	TraesCS1B03G0424200	-0.809272	-0.420344	0.000140198	0.00308524
MergePeak_1166	TraesCS1B03G0425900	-0.808275	-0.192904	0.00222034	0.0316598
MergePeak_1167	TraesCS1B03G0427300	-0.684135	0.195126	0.306235	0.957897
MergePeak_1168	TraesCS1B03G0429800	0.0134447	0.317258	0.370151	0.966504
MergePeak_1169	TraesCS1B03G0429800	-0.321285	0.317258	0.370151	0.966504
MergePeak_1170	TraesCS1B03G0430700	-1.75764	-0.687425	0.0155854	0.150883
MergePeak_1171	TraesCS1B03G0432100	-0.58513	0.525182	0.89761	0.986828
MergePeak_1172	TraesCS1B03G0432500	-0.0198109	0.522935	0.813719	0.969282
MergePeak_1173	TraesCS1B03G0433500	0.405632	0.794022	0.202616	0.811373
MergePeak_1174	TraesCS1B03G0435100	-0.50398	0.329009	0.72812	0.966504
MergePeak_1175	TraesCS1B03G0436100	-0.0651839	0.550147	0.825747	0.972861
MergePeak_1176	TraesCS1B03G0438100	0.697789	0.542483	0.684634	0.966504
MergePeak_1177	TraesCS1B03G0438200	0.121962	0.688659	0.413037	0.966504
MergePeak_1178	TraesCS1B03G0438200	0.967811	0.688659	0.413037	0.966504
MergePeak_1179	TraesCS1B03G0438300	0.77417	0.762575	0.231605	0.861251
MergePeak_1180	TraesCS1B03G0439800	0.399524	0.541862	0.864908	0.979049
MergePeak_1181	TraesCS1B03G0441200LC	-0.462436	0.237009	0.88943	0.983924
MergePeak_1182	TraesCS1B03G0442100	0.374963	1.42506	0.00047842	0.00884144
MergePeak_1183	TraesCS1B03G0443100	2.93591	0.983522	0.0518855	0.363502
MergePeak_1184	TraesCS1B03G0443100	-0.267739	0.983522	0.0518855	0.363502
MergePeak_1184	TraesCS1B03G0443200LC	-0.267739	0	1	1
MergePeak_1185	TraesCS1B03G0444200	0.0488796	0.803548	0.158559	0.717414
MergePeak_1186	TraesCS1B03G0446700	0.379861	0.546275	0.711626	0.966504
MergePeak_1187	TraesCS1B03G0446700	0.0691916	0.546275	0.711626	0.966504
MergePeak_1188	TraesCS1B03G0447400	0.422892	0.693846	0.452661	0.966504
MergePeak_1189	TraesCS1B03G0447500LC	1.89956	0.299909	0.934493	0.996296
MergePeak_1190	TraesCS1B03G0448900	-0.0895348	0.85735	0.229621	0.85846
MergePeak_1191	TraesCS1B03G0450000	1.3089	0.887234	0.062485	0.411715
MergePeak_1192	TraesCS1B03G0453000	0.316691	0.46518	0.968773	0.996296
MergePeak_1193	TraesCS1B03G0453100	0.52183	0.179866	0.534356	0.966504
MergePeak_1194	TraesCS1B03G0453100	1.97233	0.179866	0.534356	0.966504
MergePeak_1195	TraesCS1B03G0453200	0.775237	1.01186	0.0152167	0.148171
MergePeak_1196	TraesCS1B03G0453600	0.290013	0.290727	0.641429	0.966504
MergePeak_1197	TraesCS1B03G0453800	0.163129	0.32998	0.998492	0.999392
MergePeak_1198	TraesCS1B03G0455900	-0.190831	0.909284	0.228054	0.856477
MergePeak_1199	TraesCS1B03G0457500	2.09214	0.547422	0.465628	0.966504
MergePeak_1200	TraesCS1B03G0461100	0.26453	0.952783	0.129851	0.644729
MergePeak_1201	TraesCS1B03G0462000	2.49234	1.22036	0.00538456	0.0656269
MergePeak_1202	TraesCS1B03G0462100	0.979644	0.329701	0.883047	0.983326
MergePeak_1203	TraesCS1B03G0462200	0.00623056	0.7863	0.186047	0.776763
MergePeak_1204	TraesCS1B03G0467300	1.14234	0.6468	0.000953072	0.0158118
MergePeak_1205	TraesCS1B03G0468100	0.518475	0.528528	0.816121	0.970326
MergePeak_1206	TraesCS1B03G0468900	-0.492978	0.796661	0.107524	0.579268
MergePeak_1207	TraesCS1B03G0473000	1.93722	1.20054	0.0084083	0.0936009
MergePeak_1208	TraesCS1B03G0477200	0.188509	0.163733	0.186864	0.778519
MergePeak_1209	TraesCS1B03G0480300	0.0676231	0.557135	0.611326	0.966504
MergePeak_1210	TraesCS1B03G0482000	0.253819	2.43268	9.36666e-15	2.01464e-12
MergePeak_1211	TraesCS1B03G0482000	1.36024	2.43268	9.36666e-15	2.01464e-12
MergePeak_1212	TraesCS1B03G0483000	0.582484	0.523262	0.944929	0.996296
MergePeak_1213	TraesCS1B03G0483500	-2.80675	0.30124	0.763818	0.966504
MergePeak_1214	TraesCS1B03G0484600LC	0.444024	0.230462	0.361552	0.966504
MergePeak_1215	TraesCS1B03G0485900	0.776839	0.38572	0.662866	0.966504
MergePeak_1216	TraesCS1B03G0486400	-1.03553	0.757747	0.401234	0.966504
MergePeak_1217	TraesCS1B03G0490200LC	-0.730806	0.0867116	0.665149	0.966504
MergePeak_1218	TraesCS1B03G0492700	0.157432	0.252281	0.611927	0.966504
MergePeak_1219	TraesCS1B03G0493200	0.19461	0.284447	0.525278	0.966504
MergePeak_1220	TraesCS1B03G0494100	2.98363	1.25833	0.00169479	0.0254177
MergePeak_1221	TraesCS1B03G0495300	-2.01622	-1.15883	3.32611e-06	0.000118056
MergePeak_1222	TraesCS1B03G0496900	-0.698638	0.559835	0.817996	0.971187
MergePeak_1223	TraesCS1B03G0496900	0.288679	0.559835	0.817996	0.971187
MergePeak_1224	TraesCS1B03G0497000	-0.437902	0.485127	0.731198	0.966504
MergePeak_1225	TraesCS1B03G0498700	2.1988	1.2264	0.00391671	0.0505705
MergePeak_1226	TraesCS1B03G0499000	0.134688	0.231455	0.614617	0.966504
MergePeak_1227	TraesCS1B03G0499300	-0.431547	0.512585	0.857374	0.976999
MergePeak_1228	TraesCS1B03G0499300	2.74933	0.512585	0.857374	0.976999
MergePeak_1229	TraesCS1B03G0500650	0.431068	0	1	1
MergePeak_1229	TraesCS1B03G0500700	0.431068	1.04427	0.0069386	0.0803669
MergePeak_1230	TraesCS1B03G0501900	0.0662383	0.318471	0.711139	0.966504
MergePeak_1231	TraesCS1B03G0502700	0.859256	0.633811	0.519531	0.966504
MergePeak_1232	TraesCS1B03G0503200	-0.247631	0.359614	0.73268	0.966504
MergePeak_1233	TraesCS1B03G0505900	-0.173536	0.764504	0.376488	0.966504
MergePeak_1234	TraesCS1B03G0506100	0.0193853	0.340375	0.682001	0.966504
MergePeak_1235	TraesCS1B03G0507000	0.151726	0.466099	0.912408	0.991167
MergePeak_1236	TraesCS1B03G0507100LC	-0.799675	0.05589	0.938014	0.996296
MergePeak_1237	TraesCS1B03G0509100	0.593719	0.427942	0.679928	0.966504
MergePeak_1238	TraesCS1B03G0512400	-0.0357575	-0.158193	0.0516763	0.362459
MergePeak_1239	TraesCS1B03G0513400	0.449305	0.418758	0.816463	0.97046
MergePeak_1240	TraesCS1B03G0513500	0.261276	1.3019	0.00120819	0.0192477
MergePeak_1241	TraesCS1B03G0516100	-0.24203	-0.077018	0.0530163	0.368474
MergePeak_1242	TraesCS1B03G0516400	0.0656296	0.608958	0.711181	0.966504
MergePeak_1243	TraesCS1B03G0517600	-0.307116	0.514757	0.900647	0.987925
MergePeak_1244	TraesCS1B03G0518300	0.451245	0.898313	0.123377	0.626667
MergePeak_1245	TraesCS1B03G0521200	-1.59118	0.0991809	0.275616	0.921798
MergePeak_1246	TraesCS1B03G0521700	-0.509697	0.344034	0.979943	0.996296
MergePeak_1247	TraesCS1B03G0522500	-0.111541	0.00211302	0.0592685	0.397709
MergePeak_1248	TraesCS1B03G0527400LC	-0.661945	0.495353	0.810651	0.968082
MergePeak_1249	TraesCS1B03G0528400	-0.174604	0.277547	0.416169	0.966504
MergePeak_1250	TraesCS1B03G0530000	0.596011	0.333066	0.857971	0.976999
MergePeak_1251	TraesCS1B03G0532800	-0.193665	0.227423	0.565015	0.966504
MergePeak_1252	TraesCS1B03G0533000	-0.0805716	0.453803	0.944396	0.996296
MergePeak_1253	TraesCS1B03G0533200	0.700975	0.538488	0.840833	0.976017
MergePeak_1254	TraesCS1B03G0534400	0.222824	0.829518	0.131931	0.65023
MergePeak_1255	TraesCS1B03G0535300LC	-0.246657	0.981836	0.0458573	0.33296
MergePeak_1256	TraesCS1B03G0536700	0.960328	0.0506515	0.160988	0.722007
MergePeak_1257	TraesCS1B03G0536900	-0.247684	0.846574	0.113504	0.598258
MergePeak_1258	TraesCS1B03G0537300	0.634522	0.431802	0.96812	0.996296
MergePeak_1259	TraesCS1B03G0537900	-1.42743	-0.0327794	0.155609	0.710307
MergePeak_1260	TraesCS1B03G0538800	3.66405	0.239466	0.497065	0.966504
MergePeak_1261	TraesCS1B03G0539000	0.375791	0.0375087	0.269889	0.916677
MergePeak_1262	TraesCS1B03G0540000	0.84525	1.26986	0.00107633	0.0174976
MergePeak_1263	TraesCS1B03G0541100	0.342169	-1.69629	1.55783e-12	2.21577e-10
MergePeak_1264	TraesCS1B03G0541300	-0.320542	-0.101835	0.0272702	0.230148
MergePeak_1265	TraesCS1B03G0547500	-0.332558	0.348522	0.822149	0.972476
MergePeak_1266	TraesCS1B03G0547800	0.846521	1.18089	0.0761457	0.46898
MergePeak_1267	TraesCS1B03G0549000	-0.25248	0.412374	0.845187	0.976527
MergePeak_1268	TraesCS1B03G0549000	2.67904	0.412374	0.845187	0.976527
MergePeak_1269	TraesCS1B03G0549100	-1.60054	-1.3141	6.34849e-11	6.57936e-09
MergePeak_1270	TraesCS1B03G0549200	0.991948	0.728974	0.410087	0.966504
MergePeak_1271	TraesCS1B03G0549500	2.45602	2.23519	3.97859e-06	0.000138094
MergePeak_1272	TraesCS1B03G0550200	2.73017	-0.122386	0.42153	0.966504
MergePeak_1273	TraesCS1B03G0550600	0.182451	0.772926	0.193957	0.792219
MergePeak_1274	TraesCS1B03G0551000LC	-0.368289	0	1	1
MergePeak_1275	TraesCS1B03G0551500LC	0.973551	0	1	1
MergePeak_1276	TraesCS1B03G0552200	0.864098	0.434455	0.970899	0.996296
MergePeak_1277	TraesCS1B03G0552200	0.723875	0.434455	0.970899	0.996296
MergePeak_1278	TraesCS1B03G0552300	0.474199	0.696231	0.380683	0.966504
MergePeak_1279	TraesCS1B03G0552400	-2.72348	0.271371	0.332927	0.966504
MergePeak_1280	TraesCS1B03G0560300	-1.26427	0.226205	0.602858	0.966504
MergePeak_1281	TraesCS1B03G0560600LC	-1.64017	-0.524303	2.00359e-05	0.000570402
MergePeak_1282	TraesCS1B03G0560900	0.0727706	0.334968	0.622988	0.966504
MergePeak_1283	TraesCS1B03G0561700	0.384804	0.706853	0.334924	0.966504
MergePeak_1284	TraesCS1B03G0562500	0.756929	0.809905	0.163206	0.728394
MergePeak_1285	TraesCS1B03G0563100	-0.073941	0.754094	0.276574	0.922713
MergePeak_1285	TraesCS1B03G0563200LC	-0.073941	1.00571	0.848362	0.976999
MergePeak_1286	TraesCS1B03G0563100	-0.0254915	0.754094	0.276574	0.922713
MergePeak_1287	TraesCS1B03G0563500	0.383331	0.948129	0.0693423	0.441081
MergePeak_1288	TraesCS1B03G0563600	-1.09042	-1.69351	2.92387e-15	6.81796e-13
MergePeak_1289	TraesCS1B03G0564700	-2.06192	-1.88257	2.83006e-11	3.16275e-09
MergePeak_1289	TraesCS1B03G0564800	-2.06192	0.175684	0.335293	0.966504
MergePeak_1290	TraesCS1B03G0567100	0.467317	0.525608	0.938038	0.996296
MergePeak_1291	TraesCS1B03G0567100	-3.14322	0.525608	0.938038	0.996296
MergePeak_1292	TraesCS1B03G0567600	0.321965	0.258483	0.474522	0.966504
MergePeak_1293	TraesCS1B03G0568700	2.41788	0.71184	0.306419	0.958278
MergePeak_1293	TraesCS1B03G0568800	2.41788	1.47675	0.009453	0.102777
MergePeak_1294	TraesCS1B03G0568700	-0.127749	0.71184	0.306419	0.958278
MergePeak_1294	TraesCS1B03G0568800	-0.127749	1.47675	0.009453	0.102777
MergePeak_1295	TraesCS1B03G0574200	-2.5552	1.52495	7.05064e-06	0.000226771
MergePeak_1296	TraesCS1B03G0574600	0.360553	0.94902	0.0918093	0.526725
MergePeak_1297	TraesCS1B03G0575500	1.69259	0.526586	0.819774	0.971555
MergePeak_1297	TraesCS1B03G0575600	1.69259	0	1	1
MergePeak_1298	TraesCS1B03G0576300	2.07828	0.809876	0.215691	0.835778
MergePeak_1299	TraesCS1B03G0576800	-0.384524	-0.104223	0.00991602	0.106593
MergePeak_1300	TraesCS1B03G0578000	-1.18619	0.41924	0.839285	0.975331
MergePeak_1300	TraesCS1B03G0578100	-1.18619	0.195456	0.387099	0.966504
MergePeak_1301	TraesCS1B03G0578200	-0.898161	0.188357	0.337306	0.966504
MergePeak_1302	TraesCS1B03G0578300LC	2.40274	0	1	1
MergePeak_1303	TraesCS1B03G0579400	-0.179904	0.251984	0.633238	0.966504
MergePeak_1304	TraesCS1B03G0581400	3.38494	2.14661	1.32655e-10	1.28168e-08
MergePeak_1305	TraesCS1B03G0581700	3.29763	1.38207	0.00290004	0.039422
MergePeak_1306	TraesCS1B03G0581700	0.81928	1.38207	0.00290004	0.039422
MergePeak_1307	TraesCS1B03G0582300	3.3536	0.537179	0.70931	0.966504
MergePeak_1308	TraesCS1B03G0582400	0.316651	0.0856032	0.187364	0.779844
MergePeak_1309	TraesCS1B03G0583400	0.606731	0.444772	0.841285	0.976017
MergePeak_1310	TraesCS1B03G0583700	0.285415	0.542906	0.785654	0.966504
MergePeak_1311	TraesCS1B03G0583900	0.426352	0.815646	0.296421	0.948509
MergePeak_1312	TraesCS1B03G0584000	-0.334169	0.401349	0.802938	0.967512
MergePeak_1312	TraesCS1B03G0584200LC	-0.334169	0.0503276	0.761039	0.966504
MergePeak_1313	TraesCS1B03G0584800	-1.20426	-0.984526	0.000136159	0.00301113
MergePeak_1314	TraesCS1B03G0585600	0.614721	0.850375	0.121341	0.620841
MergePeak_1315	TraesCS1B03G0586300	-0.488815	0.551385	0.819326	0.971555
MergePeak_1316	TraesCS1B03G0586500	1.04645	0.337437	0.628565	0.966504
MergePeak_1317	TraesCS1B03G0587600	-0.628009	-0.56415	0.00122068	0.019418
MergePeak_1318	TraesCS1B03G0588300	1.93557	1.46398	0.00139193	0.0216244
MergePeak_1319	TraesCS1B03G0590400	-0.341316	1.17976	0.0140653	0.139662
MergePeak_1320	TraesCS1B03G0591300LC	-0.615353	0.083828	0.348269	0.966504
MergePeak_1321	TraesCS1B03G0591400	0.408411	0.437165	0.788356	0.966504
MergePeak_1322	TraesCS1B03G0592200	0.717897	0.242469	0.512054	0.966504
MergePeak_1323	TraesCS1B03G0592400	0.306333	0.57471	0.740903	0.966504
MergePeak_1323	TraesCS1B03G0592500	0.306333	0.526286	0.92036	0.994062
MergePeak_1324	TraesCS1B03G0593700	0.527265	0.131521	0.0963741	0.542196
MergePeak_1325	TraesCS1B03G0596400	-0.269	0.913491	0.120074	0.616978
MergePeak_1326	TraesCS1B03G0596500	0.180256	0.45337	0.946174	0.996296
MergePeak_1327	TraesCS1B03G0596600	1.032	0.0958035	0.433038	0.966504
MergePeak_1328	TraesCS1B03G0597800	0.0615456	0.678054	0.478636	0.966504
MergePeak_1329	TraesCS1B03G0597800	1.25273	0.678054	0.478636	0.966504
MergePeak_1330	TraesCS1B03G0598300	0.909307	2.13253	1.6629e-12	2.3583e-10
MergePeak_1331	TraesCS1B03G0599000	-0.786653	-0.0512772	0.263979	0.907987
MergePeak_1332	TraesCS1B03G0599200	-0.996274	0.37399	0.7676	0.966504
MergePeak_1333	TraesCS1B03G0601800LC	0.382416	-0.18457	0.189097	0.783293
MergePeak_1334	TraesCS1B03G0601900	-0.318358	0.220668	0.38484	0.966504
MergePeak_1335	TraesCS1B03G0603900LC	-0.100563	0.116188	0.816706	0.970524
MergePeak_1336	TraesCS1B03G0605100	0.342752	0.824375	0.170511	0.74435
MergePeak_1337	TraesCS1B03G0605700	-2.99717	0.626572	0.551606	0.966504
MergePeak_1338	TraesCS1B03G0606600	0.479781	0.904351	0.0928959	0.530865
MergePeak_1339	TraesCS1B03G0607600	0.0833295	0.793633	0.152066	0.701561
MergePeak_1340	TraesCS1B03G0609200	-2.19209	0.185775	0.60138	0.966504
MergePeak_1341	TraesCS1B03G0609800	0.228733	0.144718	0.0922279	0.528524
MergePeak_1342	TraesCS1B03G0609800	-0.313314	0.144718	0.0922279	0.528524
MergePeak_1343	TraesCS1B03G0611500	1.18365	0.739326	0.396971	0.966504
MergePeak_1344	TraesCS1B03G0611500	-0.640253	0.739326	0.396971	0.966504
MergePeak_1345	TraesCS1B03G0611900LC	-0.396569	-0.732835	0.145195	0.685077
MergePeak_1346	TraesCS1B03G0612100LC	0.73282	0.711303	0.463543	0.966504
MergePeak_1347	TraesCS1B03G0613500	0.153054	0.199437	0.2476	0.886119
MergePeak_1348	TraesCS1B03G0614800	2.66727	0.79046	0.208862	0.823036
MergePeak_1348	TraesCS1B03G0614900LC	2.66727	0.280945	0.361532	0.966504
MergePeak_1349	TraesCS1B03G0614800	0.28068	0.79046	0.208862	0.823036
MergePeak_1349	TraesCS1B03G0614900LC	0.28068	0.280945	0.361532	0.966504
MergePeak_1350	TraesCS1B03G0615800	-0.0651015	-0.633459	6.43855e-07	2.73094e-05
MergePeak_1351	TraesCS1B03G0616500	0.470858	0.459781	0.962751	0.996296
MergePeak_1352	TraesCS1B03G0617500	-1.6321	-1.35827	3.08435e-10	2.7449e-08
MergePeak_1353	TraesCS1B03G0617500	-1.60501	-1.35827	3.08435e-10	2.7449e-08
MergePeak_1354	TraesCS1B03G0618700	0.381253	0.505339	0.980782	0.996296
MergePeak_1355	TraesCS1B03G0618900	0.59311	0.0408384	0.400852	0.966504
MergePeak_1355	TraesCS1B03G0619000LC	0.59311	0	1	1
MergePeak_1356	TraesCS1B03G0618900	0.720971	0.0408384	0.400852	0.966504
MergePeak_1357	TraesCS1B03G0619200	1.27292	0.456876	0.845419	0.976527
MergePeak_1358	TraesCS1B03G0619600	-0.38399	0.648651	0.614882	0.966504
MergePeak_1359	TraesCS1B03G0620000	0.848692	0.413369	0.768134	0.966504
MergePeak_1360	TraesCS1B03G0620100	0.148276	0.0256637	0.303051	0.955755
MergePeak_1361	TraesCS1B03G0621200	-0.1999	-0.0140642	0.0519541	0.363802
MergePeak_1362	TraesCS1B03G0621300	1.51789	1.14417	0.00397073	0.0511319
MergePeak_1363	TraesCS1B03G0623800	-0.811201	0.364983	0.564646	0.966504
MergePeak_1364	TraesCS1B03G0626900	-0.310159	0.511038	0.95939	0.996296
MergePeak_1365	TraesCS1B03G0630700	0.561222	0.782933	0.200998	0.808157
MergePeak_1366	TraesCS1B03G0630700	0.942184	0.782933	0.200998	0.808157
MergePeak_1367	TraesCS1B03G0632100	1.14858	0.772051	0.299855	0.953848
MergePeak_1368	TraesCS1B03G0635300	0.152431	0.500409	0.95963	0.996296
MergePeak_1369	TraesCS1B03G0635600	0.00797417	-0.744761	0.00544466	0.0662179
MergePeak_1370	TraesCS1B03G0635600	-1.63423	-0.744761	0.00544466	0.0662179
MergePeak_1371	TraesCS1B03G0635600	-1.73157	-0.744761	0.00544466	0.0662179
MergePeak_1372	TraesCS1B03G0635900	-0.723701	0.335714	0.672361	0.966504
MergePeak_1373	TraesCS1B03G0637200	0.0683289	0.372008	0.975137	0.996296
MergePeak_1374	TraesCS1B03G0637300	1.34099	0.814648	0.0823309	0.493439
MergePeak_1375	TraesCS1B03G0637900	-0.42891	-0.614267	0.00332328	0.044088
MergePeak_1375	TraesCS1B03G0638000	-0.42891	-0.0702522	0.349495	0.966504
MergePeak_1376	TraesCS1B03G0645300	0.166407	0.557292	0.813171	0.9691
MergePeak_1377	TraesCS1B03G0646900	0.216033	0.438601	0.72285	0.966504
MergePeak_1378	TraesCS1B03G0646900	1.97608	0.438601	0.72285	0.966504
MergePeak_1379	TraesCS1B03G0647000	-0.244065	0.555869	0.71381	0.966504
MergePeak_1380	TraesCS1B03G0648500	-0.177681	0.455098	0.845231	0.976527
MergePeak_1381	TraesCS1B03G0649200	1.49007	0.828939	0.129731	0.644347
MergePeak_1382	TraesCS1B03G0652900	0.444278	1.00082	0.0398353	0.301866
MergePeak_1383	TraesCS1B03G0654200	0.00555301	-0.191067	0.06294	0.413619
MergePeak_1384	TraesCS1B03G0654500	0.531486	0.827601	0.176322	0.757054
MergePeak_1385	TraesCS1B03G0654500	0.43775	0.827601	0.176322	0.757054
MergePeak_1386	TraesCS1B03G0654700LC	-0.397367	-0.0574915	0.0447937	0.327022
MergePeak_1387	TraesCS1B03G0654800	-1.06961	0.528931	0.756483	0.966504
MergePeak_1388	TraesCS1B03G0655800LC	0.309061	-0.106609	0.160741	0.721641
MergePeak_1389	TraesCS1B03G0655900	0.307331	0.218275	0.528722	0.966504
MergePeak_1390	TraesCS1B03G0657400	-0.459028	0.376897	0.848182	0.976999
MergePeak_1391	TraesCS1B03G0657900	-0.352739	0.158232	0.165217	0.731265
MergePeak_1392	TraesCS1B03G0659500	-0.0765525	0.661269	0.468983	0.966504
MergePeak_1393	TraesCS1B03G0659600	-0.200282	0.923579	0.0985151	0.549785
MergePeak_1394	TraesCS1B03G0660400	-0.0550959	-1.01006	6.42673e-05	0.00158752
MergePeak_1394	TraesCS1B03G0660500	-0.0550959	1.51425	0.139034	0.66879
MergePeak_1395	TraesCS1B03G0661000	2.54147	1.4903	0.00107488	0.0174798
MergePeak_1396	TraesCS1B03G0661400LC	0.464806	-0.123666	0.734467	0.966504
MergePeak_1397	TraesCS1B03G0661500	1.27982	0.698298	0.404984	0.966504
MergePeak_1398	TraesCS1B03G0662800	-0.550975	-0.127507	0.0067661	0.0788017
MergePeak_1399	TraesCS1B03G0662800	-0.333771	-0.127507	0.0067661	0.0788017
MergePeak_1400	TraesCS1B03G0664100	0.649422	0.0859348	0.308596	0.961042
MergePeak_1401	TraesCS1B03G0664400	0.0852416	0.137158	0.179955	0.764489
MergePeak_1402	TraesCS1B03G0665000LC	0.3629	0.296311	0.627288	0.966504
MergePeak_1403	TraesCS1B03G0666600	0.962519	1.08314	0.0184599	0.171227
MergePeak_1404	TraesCS1B03G0667100	-0.0864629	0.5318	0.878615	0.983063
MergePeak_1405	TraesCS1B03G0669100	-0.194935	0.621709	0.443517	0.966504
MergePeak_1406	TraesCS1B03G0669400	-0.202044	1.17322	0.00671156	0.0783233
MergePeak_1407	TraesCS1B03G0669400	0.472414	1.17322	0.00671156	0.0783233
MergePeak_1408	TraesCS1B03G0670800	-1.6511	0.240871	0.558056	0.966504
MergePeak_1409	TraesCS1B03G0671400	0.487186	0.637622	0.475533	0.966504
MergePeak_1410	TraesCS1B03G0671600	1.53063	0.465004	0.389181	0.966504
MergePeak_1410	TraesCS1B03G0671700	1.53063	1.30888	0.00702527	0.0812252
MergePeak_1411	TraesCS1B03G0672700	1.96591	1.2327	0.0125548	0.128224
MergePeak_1412	TraesCS1B03G0673500	-1.67397	0.154607	0.363114	0.966504
MergePeak_1413	TraesCS1B03G0673500	0.0566313	0.154607	0.363114	0.966504
MergePeak_1414	TraesCS1B03G0676400	-2.03899	-0.597635	0.0145367	0.143232
MergePeak_1414	TraesCS1B03G0676500LC	-2.03899	0.0677446	0.988106	0.996296
MergePeak_1415	TraesCS1B03G0677100	-2.47265	0.0304301	0.227954	0.856407
MergePeak_1416	TraesCS1B03G0677100	-0.360235	0.0304301	0.227954	0.856407
MergePeak_1416	TraesCS1B03G0677200	-0.360235	0.109823	0.0858094	0.504905
MergePeak_1417	TraesCS1B03G0677200	-3.66724	0.109823	0.0858094	0.504905
MergePeak_1418	TraesCS1B03G0677900	-0.964471	0.686288	0.366558	0.966504
MergePeak_1419	TraesCS1B03G0678300	0.289666	0.543182	0.878276	0.982928
MergePeak_1420	TraesCS1B03G0678300	0.527223	0.543182	0.878276	0.982928
MergePeak_1421	TraesCS1B03G0679300	0.386201	0.0464107	0.141555	0.675365
MergePeak_1422	TraesCS1B03G0680500	0.654925	0.230669	0.543337	0.966504
MergePeak_1423	TraesCS1B03G0681000	-0.541508	0.620677	0.47057	0.966504
MergePeak_1424	TraesCS1B03G0681000	-0.516864	0.620677	0.47057	0.966504
MergePeak_1424	TraesCS1B03G0681100	-0.516864	0	1	1
MergePeak_1425	TraesCS1B03G0681400	0.430671	0.780694	0.198645	0.802691
MergePeak_1426	TraesCS1B03G0682100LC	-1.74009	-0.225379	0.0907633	0.522713
MergePeak_1427	TraesCS1B03G0685800	0.146395	0.339096	0.691185	0.966504
MergePeak_1428	TraesCS1B03G0686000	0.539105	0.524208	0.731903	0.966504
MergePeak_1429	TraesCS1B03G0686300	1.98877	0.649357	0.451051	0.966504
MergePeak_1430	TraesCS1B03G0686700	-0.183794	0.380943	0.716257	0.966504
MergePeak_1431	TraesCS1B03G0688100LC	0.113918	0.403879	0.785753	0.966504
MergePeak_1431	TraesCS1B03G0688200	0.113918	0.334129	0.758334	0.966504
MergePeak_1432	TraesCS1B03G0692800	0.52074	0.487672	0.940474	0.996296
MergePeak_1433	TraesCS1B03G0693100	-0.844907	0.127165	0.386844	0.966504
MergePeak_1434	TraesCS1B03G0693300	0.566865	0.308339	0.778926	0.966504
MergePeak_1435	TraesCS1B03G0698000	2.75852	0.7394	0.242467	0.878357
MergePeak_1436	TraesCS1B03G0698500	1.70097	0.765142	0.348477	0.966504
MergePeak_1437	TraesCS1B03G0700000	0.681349	0.283632	0.606828	0.966504
MergePeak_1438	TraesCS1B03G0700700	0.00283038	0.629397	0.466905	0.966504
MergePeak_1439	TraesCS1B03G0701500	0.299834	0.782316	0.290669	0.939965
MergePeak_1440	TraesCS1B03G0701600	0.0270873	0.38827	0.80748	0.967984
MergePeak_1441	TraesCS1B03G0701700LC	-1.29537	0.249749	0.567992	0.966504
MergePeak_1442	TraesCS1B03G0704300	0.198504	0.439046	0.942638	0.996296
MergePeak_1443	TraesCS1B03G0705900	-0.969394	-0.645897	3.88807e-06	0.000135717
MergePeak_1444	TraesCS1B03G0706100	-1.31674	-0.488073	0.00737263	0.0844263
MergePeak_1444	TraesCS1B03G0706200	-1.31674	0	1	1
MergePeak_1445	TraesCS1B03G0706300	-0.0873767	0.518688	0.908737	0.990077
MergePeak_1446	TraesCS1B03G0707100	0.738382	0.508057	0.925434	0.995677
MergePeak_1447	TraesCS1B03G0707300	1.39091	1.43257	0.000539793	0.00982218
MergePeak_1448	TraesCS1B03G0707500LC	-2.40426	-0.120673	0.2098	0.825047
MergePeak_1449	TraesCS1B03G0707500LC	0.618886	-0.120673	0.2098	0.825047
MergePeak_1449	TraesCS1B03G0707600	0.618886	0.608301	0.415318	0.966504
MergePeak_1450	TraesCS1B03G0708000	-0.0515303	0.321219	0.754239	0.966504
MergePeak_1451	TraesCS1B03G0708200LC	0.125166	0.213058	0.570643	0.966504
MergePeak_1452	TraesCS1B03G0710100	-0.925587	-0.55932	0.00028472	0.00569112
MergePeak_1453	TraesCS1B03G0710100	-0.274919	-0.55932	0.00028472	0.00569112
MergePeak_1454	TraesCS1B03G0711900	0.243244	0.113009	0.40781	0.966504
MergePeak_1454	TraesCS1B03G0712000	0.243244	0.900298	0.231	0.860188
MergePeak_1455	TraesCS1B03G0712000	0.991319	0.900298	0.231	0.860188
MergePeak_1456	TraesCS1B03G0714000	0.359816	0.290452	0.577118	0.966504
MergePeak_1457	TraesCS1B03G0714500	-0.0167269	0.3128	0.462484	0.966504
MergePeak_1458	TraesCS1B03G0714500	0.374039	0.3128	0.462484	0.966504
MergePeak_1459	TraesCS1B03G0716000	0.219505	0.437202	0.785486	0.966504
MergePeak_1460	TraesCS1B03G0716500	-0.555723	0.14525	0.954639	0.996296
MergePeak_1461	TraesCS1B03G0717200	-0.942228	-0.340409	9.39655e-05	0.00219481
MergePeak_1462	TraesCS1B03G0717200	-0.690768	-0.340409	9.39655e-05	0.00219481
MergePeak_1463	TraesCS1B03G0719800	-0.431637	0.367085	0.612848	0.966504
MergePeak_1464	TraesCS1B03G0720100	-0.888481	-0.544749	0.000293554	0.00583892
MergePeak_1465	TraesCS1B03G0721300	0.305287	0.125531	0.943419	0.996296
MergePeak_1466	TraesCS1B03G0722400	-0.77297	-0.250187	0.0377309	0.2907
MergePeak_1467	TraesCS1B03G0723100	-0.905492	0.68182	0.274806	0.920799
MergePeak_1468	TraesCS1B03G0723300	0.363503	0.423639	0.837776	0.974759
MergePeak_1469	TraesCS1B03G0723500	-0.67166	-0.613659	0.000274926	0.00552724
MergePeak_1470	TraesCS1B03G0724700	0.63651	1.14402	0.0128625	0.130665
MergePeak_1471	TraesCS1B03G0724700	-0.396479	1.14402	0.0128625	0.130665
MergePeak_1472	TraesCS1B03G0724900	-0.288249	0.377469	0.755956	0.966504
MergePeak_1473	TraesCS1B03G0725800	0.222261	0.843406	0.150936	0.699343
MergePeak_1474	TraesCS1B03G0728600	0.771569	0.733645	0.305054	0.956228
MergePeak_1475	TraesCS1B03G0729000	2.3619	-0.124204	0.315928	0.966504
MergePeak_1476	TraesCS1B03G0729700	0.228959	0.476023	0.993139	0.997417
MergePeak_1477	TraesCS1B03G0730000	1.81828	0.403009	0.901703	0.988239
MergePeak_1478	TraesCS1B03G0730400	0.956425	0.375593	0.875867	0.98219
MergePeak_1479	TraesCS1B03G0731200	-0.241667	0.385195	0.706133	0.966504
MergePeak_1480	TraesCS1B03G0731200	-1.51326	0.385195	0.706133	0.966504
MergePeak_1481	TraesCS1B03G0731800	-0.647667	0.38033	0.59495	0.966504
MergePeak_1482	TraesCS1B03G0733900	-0.105026	0.184453	0.613193	0.966504
MergePeak_1483	TraesCS1B03G0734000	0.72624	0.331323	0.602844	0.966504
MergePeak_1484	TraesCS1B03G0734100	-0.34663	-0.0487	0.13279	0.652609
MergePeak_1485	TraesCS1B03G0734800	1.91897	1.66711	5.13328e-05	0.00130353
MergePeak_1486	TraesCS1B03G0735900	0.557593	1.0286	0.00409938	0.0524543
MergePeak_1487	TraesCS1B03G0735900	0.682664	1.0286	0.00409938	0.0524543
MergePeak_1488	TraesCS1B03G0737600	2.64201	-0.0453768	0.202695	0.81155
MergePeak_1489	TraesCS1B03G0738000	-1.02006	0.390986	0.48273	0.966504
MergePeak_1490	TraesCS1B03G0739000	0.339142	0.123064	0.15726	0.714647
MergePeak_1491	TraesCS1B03G0739200	0.317833	0.893887	0.0810381	0.488895
MergePeak_1491	TraesCS1B03G0739300LC	0.317833	0.0761641	0.585535	0.966504
MergePeak_1492	TraesCS1B03G0739200	0.883732	0.893887	0.0810381	0.488895
MergePeak_1493	TraesCS1B03G0741000	-1.85325	2.47793	4.57041e-13	7.1972e-11
MergePeak_1494	TraesCS1B03G0741000	0.45611	2.47793	4.57041e-13	7.1972e-11
MergePeak_1495	TraesCS1B03G0741600	-0.478017	-0.194703	0.0597295	0.399669
MergePeak_1496	TraesCS1B03G0741800	-0.249193	1.0044	0.233553	0.864849
MergePeak_1496	TraesCS1B03G0741900	-0.249193	-0.471131	0.000278986	0.0055938
MergePeak_1497	TraesCS1B03G0741900	-0.281302	-0.471131	0.000278986	0.0055938
MergePeak_1498	TraesCS1B03G0745900	-0.360551	0.63257	0.544543	0.966504
MergePeak_1499	TraesCS1B03G0745900	0.469376	0.63257	0.544543	0.966504
MergePeak_1500	TraesCS1B03G0746000	0.569599	1.02174	0.0265264	0.225055
MergePeak_1501	TraesCS1B03G0748200	1.22063	1.495	7.40068e-05	0.00179026
MergePeak_1501	TraesCS1B03G0748300LC	1.22063	1.17765	0.0715324	0.449762
MergePeak_1502	TraesCS1B03G0748200	1.53733	1.495	7.40068e-05	0.00179026
MergePeak_1503	TraesCS1B03G0750300	-0.159396	0.0605618	0.0802083	0.485676
MergePeak_1504	TraesCS1B03G0756000	1.00682	0.983484	0.0786652	0.479595
MergePeak_1505	TraesCS1B03G0756100	0.478722	-0.0371334	0.633832	0.966504
MergePeak_1506	TraesCS1B03G0756400	0.12301	0.294112	0.89291	0.985222
MergePeak_1507	TraesCS1B03G0756500	0.252988	0.522665	0.851647	0.976999
MergePeak_1508	TraesCS1B03G0758600	-0.550937	1.17897	0.00357524	0.0468665
MergePeak_1509	TraesCS1B03G0758900	0.0282276	0.829952	0.143243	0.67947
MergePeak_1510	TraesCS1B03G0759600	-0.699848	1.25412	0.00829948	0.092666
MergePeak_1511	TraesCS1B03G0760500	0.125649	-0.556138	8.74045e-06	0.000273238
MergePeak_1512	TraesCS1B03G0760600	0.275731	0.281872	0.411572	0.966504
MergePeak_1513	TraesCS1B03G0761600	0.413084	0.209453	0.336902	0.966504
MergePeak_1514	TraesCS1B03G0762600	-0.732135	0.154008	0.162349	0.725873
MergePeak_1515	TraesCS1B03G0763000	-2.00681	-0.160828	0.0873985	0.511247
MergePeak_1516	TraesCS1B03G0763200	-0.501938	0.262401	0.483451	0.966504
MergePeak_1517	TraesCS1B03G0764800	0.314754	0.448412	0.777182	0.966504
MergePeak_1518	TraesCS1B03G0765800	0.824843	1.41512	5.10985e-05	0.00129894
MergePeak_1519	TraesCS1B03G0766700	0.555649	0.140045	0.207726	0.821049
MergePeak_1520	TraesCS1B03G0767900	1.2655	1.54271	0.000307161	0.0060684
MergePeak_1521	TraesCS1B03G0769100	-0.735941	-0.0118167	0.0633562	0.415566
MergePeak_1522	TraesCS1B03G0773400	0.945667	0.64682	0.469905	0.966504
MergePeak_1523	TraesCS1B03G0775600LC	-2.4891	-1.28843	2.72259e-05	0.000743531
MergePeak_1524	TraesCS1B03G0776500	0.30436	0.84921	0.122446	0.624192
MergePeak_1525	TraesCS1B03G0776600	-0.852895	-0.139313	0.0313357	0.254346
MergePeak_1526	TraesCS1B03G0779200	1.00994	0.602188	0.640633	0.966504
MergePeak_1527	TraesCS1B03G0779400	0.552783	0.56171	0.674084	0.966504
MergePeak_1528	TraesCS1B03G0779700	0.457309	0.684559	0.560207	0.966504
MergePeak_1529	TraesCS1B03G0783000	-0.0867638	0.545401	0.702067	0.966504
MergePeak_1530	TraesCS1B03G0783400	2.86179	0.464051	0.438346	0.966504
MergePeak_1531	TraesCS1B03G0786400	-0.105571	0.641131	0.557455	0.966504
MergePeak_1532	TraesCS1B03G0786400	-0.676352	0.641131	0.557455	0.966504
MergePeak_1533	TraesCS1B03G0787500	0.453438	0.78736	0.247253	0.886119
MergePeak_1533	TraesCS1B03G0787600LC	0.453438	-0.0327146	0.335061	0.966504
MergePeak_1534	TraesCS1B03G0789500LC	1.20406	0	1	1
MergePeak_1534	TraesCS1B03G0789600	1.20406	1.16019	0.0119864	0.123589
MergePeak_1535	TraesCS1B03G0794000	-0.310558	0.849883	0.124331	0.62998
MergePeak_1536	TraesCS1B03G0794700	0.693026	0.456099	0.891523	0.984768
MergePeak_1537	TraesCS1B03G0794800	2.51145	0.365839	0.850054	0.976999
MergePeak_1538	TraesCS1B03G0797600	-2.25293	0.641982	0.666298	0.966504
MergePeak_1539	TraesCS1B03G0797600	0.123853	0.641982	0.666298	0.966504
MergePeak_1540	TraesCS1B03G0798200	-0.172137	0.341742	0.55522	0.966504
MergePeak_1541	TraesCS1B03G0799200	-1.45098	0.164073	0.186655	0.778127
MergePeak_1542	TraesCS1B03G0800600	-0.408715	0.42741	0.867371	0.979838
MergePeak_1543	TraesCS1B03G0803700	-0.893674	0.644011	0.531146	0.966504
MergePeak_1544	TraesCS1B03G0805100	-0.511947	0.107124	0.648007	0.966504
MergePeak_1545	TraesCS1B03G0806900	-0.099424	-0.624171	0.000623617	0.0110938
MergePeak_1546	TraesCS1B03G0807800	0.155665	-0.0961182	0.651372	0.966504
MergePeak_1547	TraesCS1B03G0808300	-2.93476	0.271926	0.727614	0.966504
MergePeak_1547	TraesCS1B03G0808400LC	-2.93476	0.126973	0.627288	0.966504
MergePeak_1548	TraesCS1B03G0808400LC	0.868635	0.126973	0.627288	0.966504
MergePeak_1549	TraesCS1B03G0809400	-0.550897	-0.215484	0.0236167	0.206473
MergePeak_1550	TraesCS1B03G0810500	-0.821427	-0.464104	0.000328241	0.00641432
MergePeak_1551	TraesCS1B03G0812300	0.0958876	0.534754	0.802563	0.967512
MergePeak_1552	TraesCS1B03G0812400	0.546955	0.951665	0.113695	0.598612
MergePeak_1553	TraesCS1B03G0812400	1.11224	0.951665	0.113695	0.598612
MergePeak_1554	TraesCS1B03G0812700	0.658046	0.663035	0.518088	0.966504
MergePeak_1555	TraesCS1B03G0814100	1.01244	0.945044	0.183083	0.770654
MergePeak_1556	TraesCS1B03G0814700	0.151952	0.262308	0.875697	0.98219
MergePeak_1557	TraesCS1B03G0815600	1.16591	0.893922	0.180643	0.766516
MergePeak_1558	TraesCS1B03G0815600	-0.138786	0.893922	0.180643	0.766516
MergePeak_1559	TraesCS1B03G0816900	0.323733	0.605001	0.650065	0.966504
MergePeak_1560	TraesCS1B03G0819100	0.319759	0.696088	0.496697	0.966504
MergePeak_1561	TraesCS1B03G0819700	0.803315	0.423374	0.693687	0.966504
MergePeak_1562	TraesCS1B03G0819700	0.523541	0.423374	0.693687	0.966504
MergePeak_1563	TraesCS1B03G0821000	-0.860277	-0.312865	0.178013	0.760235
MergePeak_1564	TraesCS1B03G0825600	-0.167473	0.860107	0.129894	0.644889
MergePeak_1565	TraesCS1B03G0827200	1.03764	1.6062	0.00674409	0.0785925
MergePeak_1566	TraesCS1B03G0828400	1.94103	0.409111	0.897302	0.986663
MergePeak_1567	TraesCS1B03G0828400	0.804789	0.409111	0.897302	0.986663
MergePeak_1568	TraesCS1B03G0831000	-0.480426	-0.863167	0.110856	0.589814
MergePeak_1569	TraesCS1B03G0832200	-2.92837	0	1	1
MergePeak_1570	TraesCS1B03G0833400	0.889551	0.689381	0.467503	0.966504
MergePeak_1571	TraesCS1B03G0835000	0.266338	0.013446	0.15403	0.706577
MergePeak_1572	TraesCS1B03G0840600	-1.85036	-0.849499	2.38466e-06	8.7423e-05
MergePeak_1573	TraesCS1B03G0840600	-1.12916	-0.849499	2.38466e-06	8.7423e-05
MergePeak_1574	TraesCS1B03G0842600	0.0946697	0.242956	0.559591	0.966504
MergePeak_1575	TraesCS1B03G0844500	2.03899	0.75901	0.26516	0.909696
MergePeak_1576	TraesCS1B03G0844900	1.73716	0.481499	0.679678	0.966504
MergePeak_1577	TraesCS1B03G0847700	-0.818724	0.0291093	0.171945	0.747539
MergePeak_1578	TraesCS1B03G0847800	-0.743781	-0.357776	0.000977371	0.0161514
MergePeak_1579	TraesCS1B03G0848200	-0.00351685	0.368051	0.701657	0.966504
MergePeak_1580	TraesCS1B03G0854300	0.661891	0.820927	0.21123	0.826448
MergePeak_1581	TraesCS1B03G0856300	-1.21543	-1.173	8.07435e-06	0.000255129
MergePeak_1581	TraesCS1B03G0856400	-1.21543	0.0975075	0.80853	0.967984
MergePeak_1582	TraesCS1B03G0856500	-0.222304	0.746182	0.309652	0.962623
MergePeak_1583	TraesCS1B03G0856500	2.60242	0.746182	0.309652	0.962623
MergePeak_1584	TraesCS1B03G0859400	-0.565094	-0.684847	0.00043899	0.00821129
MergePeak_1585	TraesCS1B03G0860000	0.832214	0.0761465	0.144704	0.683545
MergePeak_1586	TraesCS1B03G0861000LC	2.28646	0.225275	0.0636327	0.416591
MergePeak_1587	TraesCS1B03G0861000LC	-0.646742	0.225275	0.0636327	0.416591
MergePeak_1588	TraesCS1B03G0861700	-0.994893	-0.176141	0.0251214	0.216054
MergePeak_1589	TraesCS1B03G0864600	0.542857	-0.0421042	0.166543	0.734337
MergePeak_1590	TraesCS1B03G0864700	0.109268	0.196531	0.278061	0.922914
MergePeak_1591	TraesCS1B03G0867700	0.276382	-0.410417	0.0982273	0.54862
MergePeak_1592	TraesCS1B03G0868000	-0.684107	0.264537	0.535275	0.966504
MergePeak_1592	TraesCS1B03G0868100	-0.684107	0.374169	0.936348	0.996296
MergePeak_1593	TraesCS1B03G0868300	-2.62729	-0.191179	0.0138957	0.138406
MergePeak_1594	TraesCS1B03G0869000	1.40971	1.54899	0.000201749	0.00423786
MergePeak_1595	TraesCS1B03G0871200	-3.22026	-3.48009	1.35263e-40	3.74888e-37
MergePeak_1596	TraesCS1B03G0873200	0.637201	0.580063	0.801195	0.967173
MergePeak_1597	TraesCS1B03G0873200	0.528487	0.580063	0.801195	0.967173
MergePeak_1598	TraesCS1B03G0873200	0.279772	0.580063	0.801195	0.967173
MergePeak_1599	TraesCS1B03G0873400	0.182228	0.71243	0.388099	0.966504
MergePeak_1600	TraesCS1B03G0874400	1.08937	0.283443	0.8022	0.967393
MergePeak_1601	TraesCS1B03G0874800	0.553321	0.625776	0.632269	0.966504
MergePeak_1602	TraesCS1B03G0874800	1.6341	0.625776	0.632269	0.966504
MergePeak_1603	TraesCS1B03G0876200	-0.0220504	-0.616567	0.000980608	0.0161966
MergePeak_1604	TraesCS1B03G0880700	-0.917025	-1.29987	3.27854e-08	1.89983e-06
MergePeak_1605	TraesCS1B03G0881400	1.9013	1.07702	0.0298855	0.2457
MergePeak_1606	TraesCS1B03G0882400	0.695204	0.929519	0.0678928	0.435314
MergePeak_1607	TraesCS1B03G0884700LC	1.95338	0	1	1
MergePeak_1608	TraesCS1B03G0885000LC	-2.61573	-0.792439	0.182153	0.768745
MergePeak_1609	TraesCS1B03G0885100	-0.212317	0.845822	0.149997	0.697584
MergePeak_1610	TraesCS1B03G0888400	3.04149	2.06766	3.33894e-11	3.67639e-09
MergePeak_1611	TraesCS1B03G0892400	-2.03141	-2.46603	1.64628e-21	7.49746e-19
MergePeak_1612	TraesCS1B03G0892900	0.0974962	0.142948	0.336959	0.966504
MergePeak_1613	TraesCS1B03G0893400	-1.39672	0.321714	0.937831	0.996296
MergePeak_1614	TraesCS1B03G0896200	0.150903	0.278352	0.317217	0.966504
MergePeak_1615	TraesCS1B03G0897700	-2.22542	-0.810258	0.00101828	0.016725
MergePeak_1616	TraesCS1B03G0897800	0.364392	0.737653	0.286474	0.933726
MergePeak_1617	TraesCS1B03G0901700	2.37661	0.726715	0.321727	0.966504
MergePeak_1618	TraesCS1B03G0904500	-0.393957	-0.0578366	0.00353133	0.0464025
MergePeak_1619	TraesCS1B03G0904500	-0.216968	-0.0578366	0.00353133	0.0464025
MergePeak_1620	TraesCS1B03G0909400LC	-1.35417	-0.683384	0.0170573	0.161437
MergePeak_1621	TraesCS1B03G0912500	-0.771323	0.175874	0.607636	0.966504
MergePeak_1622	TraesCS1B03G0916100	0.0731775	0.522528	0.756749	0.966504
MergePeak_1623	TraesCS1B03G0916800	-0.0129918	0.364173	0.860284	0.977275
MergePeak_1624	TraesCS1B03G0917100	0.281211	0.70579	0.423869	0.966504
MergePeak_1625	TraesCS1B03G0920200	-0.10757	0.590038	0.684282	0.966504
MergePeak_1626	TraesCS1B03G0920900	1.69643	0.199774	0.959474	0.996296
MergePeak_1627	TraesCS1B03G0924400	0.121706	0.0668678	0.630633	0.966504
MergePeak_1627	TraesCS1B03G0924500	0.121706	0.796313	0.258071	0.901797
MergePeak_1628	TraesCS1B03G0926300	-1.83851	0.501296	0.897241	0.986641
MergePeak_1629	TraesCS1B03G0926300	-1.28699	0.501296	0.897241	0.986641
MergePeak_1630	TraesCS1B03G0926300	-0.114191	0.501296	0.897241	0.986641
MergePeak_1631	TraesCS1B03G0926300	-0.0769403	0.501296	0.897241	0.986641
MergePeak_1632	TraesCS1B03G0929200	2.96321	1.79934	1.57559e-07	7.72303e-06
MergePeak_1633	TraesCS1B03G0929600	-0.159742	0.522892	0.964177	0.996296
MergePeak_1634	TraesCS1B03G0929600	0.626501	0.522892	0.964177	0.996296
MergePeak_1635	TraesCS1B03G0930600	-0.445948	0.0307458	0.0282317	0.23603
MergePeak_1635	TraesCS1B03G0930700LC	-0.445948	0	1	1
MergePeak_1635	TraesCS1B03G0930800LC	-0.445948	0	1	1
MergePeak_1635	TraesCS1B03G0930900LC	-0.445948	0	1	1
MergePeak_1636	TraesCS1B03G0930600	0.0706201	0.0307458	0.0282317	0.23603
MergePeak_1637	TraesCS1B03G0931100	-0.516672	0.694228	0.34226	0.966504
MergePeak_1638	TraesCS1B03G0934600	0.698543	0.396435	0.689524	0.966504
MergePeak_1639	TraesCS1B03G0934900	0.565759	0.745057	0.309358	0.962357
MergePeak_1640	TraesCS1B03G0935300	0.725024	0.566778	0.307236	0.959537
MergePeak_1641	TraesCS1B03G0935500	0.441505	0.485353	0.958698	0.996296
MergePeak_1642	TraesCS1B03G0938300	2.10874	0.682923	0.420352	0.966504
MergePeak_1643	TraesCS1B03G0938800	0.707889	0.537711	0.85901	0.976999
MergePeak_1644	TraesCS1B03G0939600	-0.37383	0.735151	0.1363	0.662441
MergePeak_1645	TraesCS1B03G0940900	0.298193	0.59845	0.583306	0.966504
MergePeak_1646	TraesCS1B03G0941300	0.135357	0.455829	0.221365	0.843015
MergePeak_1647	TraesCS1B03G0941300	-0.12282	0.455829	0.221365	0.843015
MergePeak_1648	TraesCS1B03G0944600	-0.0742942	0.600432	0.600485	0.966504
MergePeak_1649	TraesCS1B03G0945100	0.740184	0.400794	0.745932	0.966504
MergePeak_1650	TraesCS1B03G0945200	0.261357	0.837432	0.118646	0.6132
MergePeak_1651	TraesCS1B03G0945800	0.154447	0.413401	0.939779	0.996296
MergePeak_1652	TraesCS1B03G0946900	-0.409211	0.112197	0.349167	0.966504
MergePeak_1653	TraesCS1B03G0947300	0.681801	0.870145	0.154445	0.707523
MergePeak_1654	TraesCS1B03G0947900	0.803116	0.38804	0.846358	0.976568
MergePeak_1655	TraesCS1B03G0948200	0.936717	-0.851389	5.93316e-05	0.00147764
MergePeak_1656	TraesCS1B03G0948600	-2.10339	0.102102	0.581888	0.966504
MergePeak_1657	TraesCS1B03G0948800	1.26469	0.347793	0.957576	0.996296
MergePeak_1658	TraesCS1B03G0950100	1.86941	0.238205	0.835796	0.973781
MergePeak_1659	TraesCS1B03G0950200	-1.30488	-0.0697024	0.124108	0.629194
MergePeak_1660	TraesCS1B03G0950600	1.69304	-0.0167548	0.604311	0.966504
MergePeak_1660	TraesCS1B03G0950700	1.69304	0	1	1
MergePeak_1661	TraesCS1B03G0951200	0.0797981	0.645027	0.5445	0.966504
MergePeak_1661	TraesCS1B03G0951300LC	0.0797981	0.907115	0.227165	0.854801
MergePeak_1662	TraesCS1B03G0956500	1.90565	0.279925	0.574872	0.966504
MergePeak_1663	TraesCS1B03G0956500	0.580086	0.279925	0.574872	0.966504
MergePeak_1664	TraesCS1B03G0956800LC	-1.20291	0.0846029	0.424875	0.966504
MergePeak_1665	TraesCS1B03G0959000	0.193005	0.668802	0.479851	0.966504
MergePeak_1666	TraesCS1B03G0959800	0.0019742	0.531927	0.905862	0.989343
MergePeak_1667	TraesCS1B03G0960200	0.255906	-0.206429	0.0198417	0.180946
MergePeak_1668	TraesCS1B03G0960800	0.263905	0.308737	0.551007	0.966504
MergePeak_1669	TraesCS1B03G0961400	0.390632	0.430975	0.886204	0.983326
MergePeak_1670	TraesCS1B03G0962300	-0.171492	0.286625	0.424186	0.966504
MergePeak_1671	TraesCS1B03G0962400	-2.62198	-1.05525	3.26782e-05	0.000875425
MergePeak_1672	TraesCS1B03G0962500	0.0589204	0.903005	0.0634543	0.415957
MergePeak_1673	TraesCS1B03G0962600	0.949342	0.874145	0.0924971	0.529325
MergePeak_1674	TraesCS1B03G0963300	0.559915	0.945006	0.0558786	0.382018
MergePeak_1675	TraesCS1B03G0966900	0.245411	0.13459	0.468006	0.966504
MergePeak_1676	TraesCS1B03G0968500	0.156843	0.44567	0.902281	0.988239
MergePeak_1677	TraesCS1B03G0968600	0.82306	-0.54722	0.0992467	0.55212
MergePeak_1678	TraesCS1B03G0973700LC	-0.167775	-0.270359	0.011093	0.116495
MergePeak_1679	TraesCS1B03G0974400	0.641734	0.470667	0.988014	0.996296
MergePeak_1680	TraesCS1B03G0982800	2.34418	1.01614	0.0471921	0.340005
MergePeak_1681	TraesCS1B03G0986900	-0.456875	0.483714	0.770958	0.966504
MergePeak_1682	TraesCS1B03G0989400	0.441317	0.757593	0.296502	0.948667
MergePeak_1683	TraesCS1B03G0990600	0.263197	0.891919	0.192152	0.78991
MergePeak_1684	TraesCS1B03G0994200	-0.0101425	-0.36586	0.00177537	0.0264017
MergePeak_1685	TraesCS1B03G0994700	0.268031	0.56148	0.828737	0.972861
MergePeak_1686	TraesCS1B03G0996300	0.302685	0.615419	0.604191	0.966504
MergePeak_1687	TraesCS1B03G0996600	-0.641827	0.49676	0.759734	0.966504
MergePeak_1688	TraesCS1B03G1000000	-0.210969	0.0996941	0.425695	0.966504
MergePeak_1689	TraesCS1B03G1001300	1.8967	0.923314	0.0597031	0.399547
MergePeak_1690	TraesCS1B03G1001600	0.035729	0.358743	0.702401	0.966504
MergePeak_1691	TraesCS1B03G1001800	0.441417	0.848476	0.218957	0.840009
MergePeak_1692	TraesCS1B03G1001800	1.75306	0.848476	0.218957	0.840009
MergePeak_1693	TraesCS1B03G1002400	-0.284895	0.478616	0.880123	0.983326
MergePeak_1694	TraesCS1B03G1002400	0.572337	0.478616	0.880123	0.983326
MergePeak_1695	TraesCS1B03G1003000	-2.06666	-1.50594	1.18727e-10	1.15749e-08
MergePeak_1696	TraesCS1B03G1003200	-2.75262	0.127633	0.567992	0.966504
MergePeak_1697	TraesCS1B03G1004700	-0.568348	-0.0721432	0.0311398	0.253202
MergePeak_1698	TraesCS1B03G1006300	-0.0209026	0.63138	0.676418	0.966504
MergePeak_1699	TraesCS1B03G1006400	-1.15796	0.177776	0.606066	0.966504
MergePeak_1700	TraesCS1B03G1014800	1.73859	0.607863	0.0430037	0.318462
MergePeak_1700	TraesCS1B03G1014900LC	1.73859	0.195879	0.43749	0.966504
MergePeak_1701	TraesCS1B03G1015900	-0.711297	1.12048	0.0394011	0.299652
MergePeak_1702	TraesCS1B03G1018400	-0.880804	-0.170221	0.0583742	0.393587
MergePeak_1703	TraesCS1B03G1018500	-0.0804846	0.0808126	0.261602	0.903985
MergePeak_1704	TraesCS1B03G1018600	-0.98539	-1.06462	0.000120614	0.00271588
MergePeak_1705	TraesCS1B03G1018800	0.815861	0.641245	0.375723	0.966504
MergePeak_1706	TraesCS1B03G1018800	0.731862	0.641245	0.375723	0.966504
MergePeak_1707	TraesCS1B03G1018900	0.369902	0.97014	0.0615469	0.407223
MergePeak_1708	TraesCS1B03G1019800	0.344124	1.08897	0.00772862	0.0877056
MergePeak_1709	TraesCS1B03G1019800	2.02378	1.08897	0.00772862	0.0877056
MergePeak_1710	TraesCS1B03G1022000	2.37814	0.0886708	0.783823	0.966504
MergePeak_1711	TraesCS1B03G1022000	-0.588537	0.0886708	0.783823	0.966504
MergePeak_1711	TraesCS1B03G1022100	-0.588537	0.667344	0.539863	0.966504
MergePeak_1712	TraesCS1B03G1023100	-0.543763	0.602196	0.622196	0.966504
MergePeak_1713	TraesCS1B03G1023100	2.22645	0.602196	0.622196	0.966504
MergePeak_1714	TraesCS1B03G1026900	1.05679	0.501353	0.642949	0.966504
MergePeak_1715	TraesCS1B03G1027100	0.266711	0.437271	0.768596	0.966504
MergePeak_1716	TraesCS1B03G1027100	0.544869	0.437271	0.768596	0.966504
MergePeak_1717	TraesCS1B03G1029200	1.78277	1.44579	0.000351331	0.00679165
MergePeak_1718	TraesCS1B03G1029400	0.962377	0.462294	0.902142	0.988239
MergePeak_1719	TraesCS1B03G1029600	-0.206127	-0.00394	0.401507	0.966504
MergePeak_1720	TraesCS1B03G1031700	0.318881	0.489461	0.951603	0.996296
MergePeak_1720	TraesCS1B03G1031800LC	0.318881	0.691801	0.556452	0.966504
MergePeak_1721	TraesCS1B03G1032500	0.384059	1.17143	0.0171825	0.1622
MergePeak_1722	TraesCS1B03G1033500LC	-0.704448	-0.116365	0.734467	0.966504
MergePeak_1723	TraesCS1B03G1034700	-0.825311	-1.32036	1.0723e-07	5.50356e-06
MergePeak_1724	TraesCS1B03G1034700	-1.12469	-1.32036	1.0723e-07	5.50356e-06
MergePeak_1725	TraesCS1B03G1035500	0.706256	1.02934	0.0533715	0.370332
MergePeak_1726	TraesCS1B03G1035500	4.0508	1.02934	0.0533715	0.370332
MergePeak_1727	TraesCS1B03G1036100	0.120167	0.251641	0.479648	0.966504
MergePeak_1728	TraesCS1B03G1036500	0.0225563	0.581403	0.801719	0.967314
MergePeak_1729	TraesCS1B03G1036600	0.667732	0.118882	0.384114	0.966504
MergePeak_1730	TraesCS1B03G1036600	2.72421	0.118882	0.384114	0.966504
MergePeak_1731	TraesCS1B03G1036800	0.463047	0.898558	0.0729217	0.455545
MergePeak_1732	TraesCS1B03G1037200LC	-1.1737	-0.0865101	0.380605	0.966504
MergePeak_1733	TraesCS1B03G1039700	-0.322411	0.417557	0.796234	0.966504
MergePeak_1734	TraesCS1B03G1040700	-0.862144	0.726624	0.319236	0.966504
MergePeak_1735	TraesCS1B03G1043800	-0.0752262	0.0881483	0.0754434	0.466514
MergePeak_1736	TraesCS1B03G1044700	-0.126067	0.576092	0.787825	0.966504
MergePeak_1737	TraesCS1B03G1045900	0.336839	0.0119367	0.0558037	0.381641
MergePeak_1738	TraesCS1B03G1048300	0.302104	0.146304	0.346603	0.966504
MergePeak_1739	TraesCS1B03G1049400LC	0.386994	0.496923	0.630462	0.966504
MergePeak_1740	TraesCS1B03G1051100	0.668829	0.614614	0.668688	0.966504
MergePeak_1741	TraesCS1B03G1051100	0.485101	0.614614	0.668688	0.966504
MergePeak_1742	TraesCS1B03G1052700	0.107014	0.202435	0.523485	0.966504
MergePeak_1743	TraesCS1B03G1052700	0.107014	0.202435	0.523485	0.966504
MergePeak_1744	TraesCS1B03G1053200	-3.9661	-3.85602	7.25259e-50	3.9085e-46
MergePeak_1745	TraesCS1B03G1053300	-3.84927	-3.6933	4.23308e-34	6.95976e-31
MergePeak_1746	TraesCS1B03G1053800	0.0675826	1.08027	0.0138752	0.138273
MergePeak_1747	TraesCS1B03G1054000	-0.114057	0.0432518	0.0279617	0.234251
MergePeak_1748	TraesCS1B03G1054000	0.502642	0.0432518	0.0279617	0.234251
MergePeak_1749	TraesCS1B03G1056200	1.86147	0.95608	0.0649794	0.422772
MergePeak_1750	TraesCS1B03G1056500	0.976302	0.925457	0.148694	0.694691
MergePeak_1751	TraesCS1B03G1059900	0.0651179	-0.174344	0.049984	0.354019
MergePeak_1751	TraesCS1B03G1060000	0.0651179	-0.260797	0.0825533	0.494047
MergePeak_1752	TraesCS1B03G1064200	-0.498465	0.242832	0.460295	0.966504
MergePeak_1753	TraesCS1B03G1068800	-0.0796021	1.03533	0.0696791	0.442382
MergePeak_1754	TraesCS1B03G1070600	0.758227	0.650653	0.53142	0.966504
MergePeak_1755	TraesCS1B03G1070600	0.742903	0.650653	0.53142	0.966504
MergePeak_1756	TraesCS1B03G1070700	0.695303	0.463569	0.826497	0.972861
MergePeak_1757	TraesCS1B03G1071300	0.249646	0.0991267	0.120212	0.617247
MergePeak_1758	TraesCS1B03G1071700	2.27083	-0.306687	0.0014525	0.0223719
MergePeak_1759	TraesCS1B03G1073100	0.459766	-0.373365	0.492891	0.966504
MergePeak_1760	TraesCS1B03G1073500	-0.4631	-0.115098	0.132297	0.651272
MergePeak_1761	TraesCS1B03G1074200LC	-0.390478	0.489013	0.813564	0.969282
MergePeak_1762	TraesCS1B03G1077000	0.708293	0.261505	0.628521	0.966504
MergePeak_1762	TraesCS1B03G1077100	0.708293	0.813238	0.173783	0.751768
MergePeak_1763	TraesCS1B03G1080900	0.732203	1.0523	0.0325682	0.261484
MergePeak_1764	TraesCS1B03G1083000	0.564495	0.860611	0.118257	0.612455
MergePeak_1764	TraesCS1B03G1083100	0.564495	-0.212263	0.176799	0.758287
MergePeak_1765	TraesCS1B03G1087200	-0.178882	0.448851	0.887638	0.983326
MergePeak_1766	TraesCS1B03G1087200	0.896116	0.448851	0.887638	0.983326
MergePeak_1767	TraesCS1B03G1087600	2.35893	0.237783	0.487818	0.966504
MergePeak_1768	TraesCS1B03G1098800LC	2.22645	-0.0648829	0.769755	0.966504
MergePeak_1769	TraesCS1B03G1104400	1.89774	2.84026	1.13095e-19	4.26875e-17
MergePeak_1770	TraesCS1B03G1106900	0.845398	0.941029	0.0553725	0.379709
MergePeak_1771	TraesCS1B03G1117500	0.193842	0.443827	0.853031	0.976999
MergePeak_1772	TraesCS1B03G1118800	-0.39704	0.896912	0.0978769	0.54744
MergePeak_1772	TraesCS1B03G1119000	-0.39704	0.248642	0.299058	0.952861
MergePeak_1773	TraesCS1B03G1118800	-0.649615	0.896912	0.0978769	0.54744
MergePeak_1773	TraesCS1B03G1119000	-0.649615	0.248642	0.299058	0.952861
MergePeak_1774	TraesCS1B03G1119600	0.0218703	0.515895	0.808406	0.967984
MergePeak_1775	TraesCS1B03G1120700	1.50414	1.60597	4.8008e-05	0.0012281
MergePeak_1776	TraesCS1B03G1123200	1.97464	0.129436	0.725122	0.966504
MergePeak_1777	TraesCS1B03G1123500	-1.85594	-0.960564	8.96766e-06	0.00027971
MergePeak_1778	TraesCS1B03G1131700	0.00635156	0.642596	0.490499	0.966504
MergePeak_1779	TraesCS1B03G1132300	-2.03159	-1.65699	2.94245e-12	3.93696e-10
MergePeak_1779	TraesCS1B03G1132400LC	-2.03159	0	1	1
MergePeak_1780	TraesCS1B03G1132300	-1.83436	-1.65699	2.94245e-12	3.93696e-10
MergePeak_1780	TraesCS1B03G1132400LC	-1.83436	0	1	1
MergePeak_1781	TraesCS1B03G1137100	1.50709	0.64834	0.445599	0.966504
MergePeak_1782	TraesCS1B03G1139600	2.61364	-0.219466	0.00214	0.0307311
MergePeak_1783	TraesCS1B03G1148100	-0.334218	0.940519	0.0573233	0.388635
MergePeak_1784	TraesCS1B03G1149500	0.918542	0.109146	0.649107	0.966504
MergePeak_1785	TraesCS1B03G1150600	-2.83058	-0.127542	0.423765	0.966504
MergePeak_1785	TraesCS1B03G1150700LC	-2.83058	0.388849	0.764401	0.966504
MergePeak_1786	TraesCS1B03G1150600	-1.44506	-0.127542	0.423765	0.966504
MergePeak_1786	TraesCS1B03G1150700LC	-1.44506	0.388849	0.764401	0.966504
MergePeak_1787	TraesCS1B03G1152500	-1.53855	-0.827063	0.00243099	0.0341163
MergePeak_1788	TraesCS1B03G1153400	2.34754	0.745552	0.349663	0.966504
MergePeak_1789	TraesCS1B03G1153400	0.403784	0.745552	0.349663	0.966504
MergePeak_1790	TraesCS1B03G1153400	-0.556725	0.745552	0.349663	0.966504
MergePeak_1791	TraesCS1B03G1155300	-0.834221	0.450095	0.973033	0.996296
MergePeak_1792	TraesCS1B03G1155300	-0.6099	0.450095	0.973033	0.996296
MergePeak_1793	TraesCS1B03G1157100	1.05476	0.532665	0.830042	0.972861
MergePeak_1794	TraesCS1B03G1160300	-0.658614	0.241132	0.3901	0.966504
MergePeak_1795	TraesCS1B03G1160400	3.68111	0.477071	0.826946	0.972861
MergePeak_1796	TraesCS1B03G1160400	0.613106	0.477071	0.826946	0.972861
MergePeak_1797	TraesCS1B03G1166400	2.62612	1.57224	2.1157e-05	0.000597818
MergePeak_1798	TraesCS1B03G1166400	2.82176	1.57224	2.1157e-05	0.000597818
MergePeak_1799	TraesCS1B03G1166600	0.341475	3.30517	8.07145e-25	5.43724e-22
MergePeak_1800	TraesCS1B03G1167300	0.361627	0.149295	0.50926	0.966504
MergePeak_1801	TraesCS1B03G1168000	-0.535991	0.0846942	0.478984	0.966504
MergePeak_1802	TraesCS1B03G1168700	-3.08352	-1.12595	3.49683e-05	0.000928061
MergePeak_1803	TraesCS1B03G1169100	-1.88011	-1.30198	9.35915e-15	2.01464e-12
MergePeak_1804	TraesCS1B03G1169500	-0.114116	0.541578	0.834141	0.972979
MergePeak_1805	TraesCS1B03G1170500	-1.72031	-2.86052	1.60171e-29	1.68882e-26
MergePeak_1806	TraesCS1B03G1170600	-0.385778	0.645513	0.489109	0.966504
MergePeak_1807	TraesCS1B03G1171700	1.16323	1.73893	2.85069e-07	1.31056e-05
MergePeak_1808	TraesCS1B03G1172600	0.470646	0.43384	0.989841	0.996705
MergePeak_1809	TraesCS1B03G1175500	0.342797	0.449105	0.817679	0.971001
MergePeak_1810	TraesCS1B03G1177500	-1.28758	-2.06441	7.85609e-13	1.18518e-10
MergePeak_1811	TraesCS1B03G1178100	0.374361	0.402443	0.887657	0.983326
MergePeak_1812	TraesCS1B03G1179000	1.62586	0.162564	0.120824	0.619013
MergePeak_1813	TraesCS1B03G1184900	-1.0593	-0.396486	0.0370067	0.286702
MergePeak_1814	TraesCS1B03G1188000	1.64857	0.129182	0.0804274	0.486577
MergePeak_1815	TraesCS1B03G1190200	-0.112104	0.406124	0.618886	0.966504
MergePeak_1816	TraesCS1B03G1190400	-0.102165	0.183043	0.190201	0.785989
MergePeak_1817	TraesCS1B03G1190800LC	0.923191	-0.056149	0.115149	0.603258
MergePeak_1818	TraesCS1B03G1192300	0.37261	0.615844	0.650663	0.966504
MergePeak_1819	TraesCS1B03G1192600	3.83472	3.22897	7.90609e-18	2.50628e-15
MergePeak_1820	TraesCS1B03G1192600	2.46577	3.22897	7.90609e-18	2.50628e-15
MergePeak_1821	TraesCS1B03G1195400	-0.995752	-0.840204	0.0416494	0.311524
MergePeak_1822	TraesCS1B03G1203400	0.618354	1.07107	0.0147112	0.144479
MergePeak_1823	TraesCS1B03G1204900	-0.00975886	0.0650135	0.570412	0.966504
MergePeak_1824	TraesCS1B03G1209500	-2.26169	-1.84102	2.08741e-14	4.24502e-12
MergePeak_1825	TraesCS1B03G1210400	0.384125	0.550754	0.764147	0.966504
MergePeak_1826	TraesCS1B03G1211300	1.2484	1.30967	0.000768713	0.013219
MergePeak_1827	TraesCS1B03G1214400	1.67013	0.870579	0.128068	0.639607
MergePeak_1828	TraesCS1B03G1215600	1.06043	0.477591	0.945247	0.996296
MergePeak_1829	TraesCS1B03G1221000	1.52807	-0.505585	0.00834058	0.0929751
MergePeak_1830	TraesCS1B03G1221300	0.591956	0.461016	0.785174	0.966504
MergePeak_1831	TraesCS1B03G1223200	0.543741	0.608628	0.627855	0.966504
MergePeak_1832	TraesCS1B03G1232400	0.714557	0.282936	0.554535	0.966504
MergePeak_1833	TraesCS1B03G1232900	-0.048355	0.433777	0.782956	0.966504
MergePeak_1834	TraesCS1B03G1235100	0.363209	0.576132	0.732513	0.966504
MergePeak_1835	TraesCS1B03G1237200	-0.0791729	0.134673	0.821886	0.972331
MergePeak_1836	TraesCS1B03G1238200	0.0874622	0.356692	0.670239	0.966504
MergePeak_1837	TraesCS1B03G1238300	-1.60732	0.654614	0.492679	0.966504
MergePeak_1838	TraesCS1B03G1241400	0.144208	0.622414	0.619947	0.966504
MergePeak_1839	TraesCS1B03G1241900	-0.184349	0.551894	0.798438	0.967066
MergePeak_1840	TraesCS1B03G1243300	0.237774	0.0214329	0.492484	0.966504
MergePeak_1841	TraesCS1B03G1244400LC	0.223871	-0.130272	0.57612	0.966504
MergePeak_1841	TraesCS1B03G1244500	0.223871	2.2968	3.05778e-10	2.72375e-08
MergePeak_1842	TraesCS1B03G1245200	1.77719	-0.0270795	0.431209	0.966504
MergePeak_1843	TraesCS1B03G1247100	-0.869973	-0.662152	0.000320442	0.00628852
MergePeak_1844	TraesCS1B03G1248500	-1.30946	-0.816935	9.54852e-06	0.000295736
MergePeak_1845	TraesCS1B03G1251900	1.14254	0.307222	0.853532	0.976999
MergePeak_1846	TraesCS1B03G1252300	0.444007	0.877836	0.0315874	0.255811
MergePeak_1847	TraesCS1B03G1257400	2.72232	0.59524	0.271283	0.918646
MergePeak_1848	TraesCS1B03G1257700	0.537924	0.410397	0.854374	0.976999
MergePeak_1849	TraesCS1B03G1257800	-0.129644	-0.0374998	0.0291772	0.241639
MergePeak_1850	TraesCS1B03G1260800	0.362833	0.431829	0.850578	0.976999
MergePeak_1851	TraesCS1B03G1263500	-0.132973	0.382601	0.666429	0.966504
MergePeak_1852	TraesCS1B03G1265300	0.266965	-0.313633	0.00626939	0.074021
MergePeak_1853	TraesCS1B03G1269100	-0.292962	0.767307	0.229767	0.85846
MergePeak_1854	TraesCS1B03G1269100	0.293574	0.767307	0.229767	0.85846
MergePeak_1855	TraesCS1B03G1273900	-0.213735	0.732565	0.241087	0.876715
MergePeak_1856	TraesCS1B03G1273900	-0.356727	0.732565	0.241087	0.876715
MergePeak_1857	TraesCS1B03G1273900	-2.77075	0.732565	0.241087	0.876715
MergePeak_1858	TraesCS1B03G1274100	-0.637734	0.336809	0.583974	0.966504
MergePeak_1859	TraesCS1B03G1275700	-1.07304	-0.151298	0.149416	0.696591
MergePeak_1860	TraesCS1B03G1276100	0.0203567	0.258116	0.372997	0.966504
MergePeak_1861	TraesCS1B03G1276600	-3.21591	0.537206	0.842767	0.976152
MergePeak_1862	TraesCS1B03G1278300	0.646112	0.840807	0.189433	0.784151
MergePeak_1863	TraesCS1B03G1278400	0.187798	0.341755	0.758445	0.966504
MergePeak_1864	TraesCS1B03G1279700	-0.0944438	0.103109	0.274309	0.920187
MergePeak_1865	TraesCS1B03G1279700	-0.117948	0.103109	0.274309	0.920187
MergePeak_1866	TraesCS1B03G1280200	0.72079	0.232153	0.694337	0.966504
MergePeak_1867	TraesCS1B03G1281000	0.435776	0.669547	0.366013	0.966504
MergePeak_1868	TraesCS1B03G1281400	0.517254	0.0158326	0.316956	0.966504
MergePeak_1869	TraesCS1B03G1281700	-0.733496	0.353778	0.923503	0.99535
MergePeak_1870	TraesCS1B03G1283600LC	1.90879	0	1	1
MergePeak_1871	TraesCS1D03G0000100	-2.18835	-1.12782	2.96014e-08	1.73188e-06
MergePeak_1871	TraesCS1D03G0000200LC	-2.18835	-0.295135	0.431942	0.966504
MergePeak_1872	TraesCS1D03G0000100	-2.32155	-1.12782	2.96014e-08	1.73188e-06
MergePeak_1872	TraesCS1D03G0000200LC	-2.32155	-0.295135	0.431942	0.966504
MergePeak_1873	TraesCS1D03G0000500	0.707604	0.402653	0.887656	0.983326
MergePeak_1874	TraesCS1D03G0000800	-0.45473	0.378919	0.61485	0.966504
MergePeak_1875	TraesCS1D03G0001000	0.942122	0.620145	0.444146	0.966504
MergePeak_1876	TraesCS1D03G0001100	0.0641167	0.717577	0.356494	0.966504
MergePeak_1877	TraesCS1D03G0001800	0.113585	0.504973	0.977019	0.996296
MergePeak_1878	TraesCS1D03G0002800	0.866079	0.476713	0.533712	0.966504
MergePeak_1879	TraesCS1D03G0008100	-0.672836	0.679067	0.377015	0.966504
MergePeak_1880	TraesCS1D03G0008200	-0.518971	0.382765	0.654782	0.966504
MergePeak_1881	TraesCS1D03G0008500	-0.618422	0.56488	0.693096	0.966504
MergePeak_1882	TraesCS1D03G0010900	0.584377	-0.460573	8.28655e-05	0.00197296
MergePeak_1883	TraesCS1D03G0016000	0.773761	0.39511	0.963589	0.996296
MergePeak_1884	TraesCS1D03G0016100	0.344864	0.365472	0.804279	0.96795
MergePeak_1885	TraesCS1D03G0022100	-0.105634	0.43099	0.913542	0.991821
MergePeak_1886	TraesCS1D03G0022700	0.215705	0.604684	0.524649	0.966504
MergePeak_1887	TraesCS1D03G0024600	0.441075	1.3044	0.000204316	0.00428113
MergePeak_1888	TraesCS1D03G0031700	0.573666	0.56375	0.512782	0.966504
MergePeak_1889	TraesCS1D03G0032700	-0.407388	1.20146	0.0147481	0.144683
MergePeak_1890	TraesCS1D03G0032900	2.22187	-0.288364	0.051975	0.363922
[truncated: 20,624 more rows]

## Sheet: Table S31. Sig. FC of IP&In
Supplementary Table S31. Significant fold changes of both m6A modified peaks related genes and transcripts in infected leaves in comparison to CK
peak ID	Gene ID	IP_log2(FC)	In_log2(FC)	p-value	FDR	pattern
MergePeak_5799	TraesCS2D03G0725900	6.57051	3.53436	9.38796e-05	0.00219333	Hyper‐Up
MergePeak_13423	TraesCS5A03G0935200	6.03455	5.65557	1.89119e-10	1.76791e-08	Hyper‐Up
MergePeak_7389	TraesCS3B03G0133200	5.01884	3.99474	5.93494e-26	4.56915e-23	Hyper‐Up
MergePeak_16979	TraesCS6B03G0561000	5.00616	1.63594	0.000242779	0.00497162	Hyper‐Up
MergePeak_18258	TraesCS6D03G0770900	4.96454	1.29902	0.00107054	0.0174357	Hyper‐Up
MergePeak_7128	TraesCS3A03G0941700	4.86563	3.22031	2.60241e-25	1.91245e-22	Hyper‐Up
MergePeak_9618	TraesCS4A03G0035700	4.77215	1.69095	4.0508e-07	1.80002e-05	Hyper‐Up
MergePeak_15455	TraesCS5D03G0513000	4.72783	2.48438	1.62316e-13	2.78678e-11	Hyper‐Up
MergePeak_4921	TraesCS2B03G1234100	4.67551	1.62952	1.09604e-06	4.37352e-05	Hyper‐Up
MergePeak_2614	TraesCS1D03G0829400	4.6379	4.01661	3.08167e-24	1.91625e-21	Hyper‐Up
MergePeak_14419	TraesCS5B03G0752100	4.6353	4.80323	5.0009e-08	2.78958e-06	Hyper‐Up
MergePeak_20155	TraesCS7B03G0831100	4.53614	1.22652	0.000482872	0.00890842	Hyper‐Up
MergePeak_9177	TraesCS3D03G0726600	4.51081	1.8285	7.5018e-06	0.000239219	Hyper‐Up
MergePeak_14618	TraesCS5B03G0999600	4.50043	3.11703	7.01403e-32	9.44984e-29	Hyper‐Up
MergePeak_4685	TraesCS2B03G0935100	4.48251	4.5656	1.10531e-38	2.55286e-35	Hyper‐Up
MergePeak_12412	TraesCS4D03G0669200	4.47566	3.27506	1.53946e-20	6.21567e-18	Hyper‐Up
MergePeak_541	TraesCS1A03G0652200	4.42502	4.06198	9.62804e-08	5.00514e-06	Hyper‐Up
MergePeak_1006	TraesCS1B03G0217600	4.38289	1.62749	1.632e-06	6.24744e-05	Hyper‐Up
MergePeak_5969	TraesCS2D03G0901800	4.26896	2.57045	1.33742e-11	1.60235e-09	Hyper‐Up
MergePeak_19324	TraesCS7A03G1159700	4.22835	2.60632	4.96565e-13	7.76916e-11	Hyper‐Up
MergePeak_5943	TraesCS2D03G0880500	4.18913	2.56934	2.01691e-12	2.807e-10	Hyper‐Up
MergePeak_2744	TraesCS1D03G0951700	4.18708	3.12029	9.37848e-22	4.33214e-19	Hyper‐Up
MergePeak_20125	TraesCS7B03G0798300	4.14625	1.40783	0.000301099	0.00596321	Hyper‐Up
MergePeak_7943	TraesCS3B03G0797400	4.139	2.90589	2.64593e-15	6.19966e-13	Hyper‐Up
MergePeak_3142	TraesCS2A03G0387200	4.13802	2.19632	4.55914e-08	2.57125e-06	Hyper‐Up
MergePeak_7376	TraesCS3B03G0090100	4.13308	2.69313	4.34715e-15	9.92214e-13	Hyper‐Up
MergePeak_786	TraesCS1A03G0899400	4.11329	1.27679	0.00196114	0.0285987	Hyper‐Up
MergePeak_1955	TraesCS1D03G0188300	4.06719	2.19428	1.56262e-08	9.67828e-07	Hyper‐Up
MergePeak_12524	TraesCS4D03G0768700	4.00912	1.51394	6.81452e-06	0.000219978	Hyper‐Up
MergePeak_3487	TraesCS2A03G0773700	3.99881	1.53797	5.52996e-06	0.000184276	Hyper‐Up
MergePeak_17370	TraesCS6B03G1014900LC	3.98562	1.62682	0.00244476	0.0342704	Hyper‐Up
MergePeak_1133	TraesCS1B03G0387000	3.96475	1.71251	3.25418e-09	2.32451e-07	Hyper‐Up
MergePeak_19057	TraesCS7A03G0822100	3.88742	2.13123	3.64379e-06	0.00012776	Hyper‐Up
MergePeak_3226	TraesCS2A03G0471300	3.88047	1.99773	6.79976e-09	4.54586e-07	Hyper‐Up
MergePeak_4964	TraesCS2B03G1307900	3.87843	3.07873	9.38079e-20	3.55459e-17	Hyper‐Up
MergePeak_4964	TraesCS2B03G1308000LC	3.87843	3.01887	2.76591e-10	2.4866e-08	Hyper‐Up
MergePeak_8567	TraesCS3D03G0222800	3.8426	1.39678	0.000225745	0.00466723	Hyper‐Up
MergePeak_5182	TraesCS2D03G0128400	3.83639	2.23237	1.62522e-07	7.93421e-06	Hyper‐Up
MergePeak_1819	TraesCS1B03G1192600	3.83472	3.22897	7.90609e-18	2.50628e-15	Hyper‐Up
MergePeak_10662	TraesCS4B03G0029700	3.80418	1.39546	0.000622	0.011073	Hyper‐Up
MergePeak_6389	TraesCS3A03G0207800	3.80026	2.43902	1.22385e-12	1.78255e-10	Hyper‐Up
MergePeak_18142	TraesCS6D03G0662100LC	3.78865	2.33061	1.3846e-11	1.65205e-09	Hyper‐Up
MergePeak_19233	TraesCS7A03G1017300	3.78673	2.43528	1.11245e-14	2.36132e-12	Hyper‐Up
MergePeak_4995	TraesCS2B03G1341400	3.76855	4.74111	6.54344e-10	5.44374e-08	Hyper‐Up
MergePeak_3152	TraesCS2A03G0392500	3.76684	1.87298	4.00038e-10	3.48029e-08	Hyper‐Up
MergePeak_8203	TraesCS3B03G1074200	3.7388	2.68384	1.79475e-13	3.05971e-11	Hyper‐Up
MergePeak_15883	TraesCS5D03G0931300	3.73668	1.45488	9.43778e-05	0.00220285	Hyper‐Up
MergePeak_19632	TraesCS7B03G0302300	3.73316	2.16697	1.30241e-10	1.26213e-08	Hyper‐Up
MergePeak_4765	TraesCS2B03G1009400	3.68989	1.70459	0.00010945	0.00250345	Hyper‐Up
MergePeak_9369	TraesCS3D03G0915600	3.67345	2.72403	9.36329e-17	2.62508e-14	Hyper‐Up
MergePeak_2606	TraesCS1D03G0813600	3.64774	3.16446	1.91778e-24	1.24022e-21	Hyper‐Up
MergePeak_4633	TraesCS2B03G0875200	3.64369	1.54254	0.00221662	0.0316161	Hyper‐Up
MergePeak_15508	TraesCS5D03G0566700	3.62624	1.75332	1.36949e-07	6.80912e-06	Hyper‐Up
MergePeak_8986	TraesCS3D03G0590600	3.61282	2.37086	7.04506e-09	4.69045e-07	Hyper‐Up
MergePeak_11779	TraesCS4D03G0097500	3.61039	2.3675	1.88194e-10	1.76212e-08	Hyper‐Up
MergePeak_3501	TraesCS2A03G0787900	3.60164	3.72519	7.04193e-20	2.69998e-17	Hyper‐Up
MergePeak_14478	TraesCS5B03G0812500	3.59513	1.7123	1.21838e-08	7.67456e-07	Hyper‐Up
MergePeak_4896	TraesCS2B03G1193400	3.58537	2.90742	3.62938e-17	1.07995e-14	Hyper‐Up
MergePeak_366	TraesCS1A03G0502800	3.58171	2.70362	1.49927e-13	2.61104e-11	Hyper‐Up
MergePeak_5047	TraesCS2B03G1426300	3.58076	1.78634	6.64934e-08	3.60141e-06	Hyper‐Up
MergePeak_7390	TraesCS3B03G0133200	3.56754	3.99474	5.93494e-26	4.56915e-23	Hyper‐Up
MergePeak_6874	TraesCS3A03G0699800	3.5605	2.04286	3.86996e-09	2.7144e-07	Hyper‐Up
MergePeak_3560	TraesCS2A03G0847000	3.56018	4.14657	6.30508e-33	9.40951e-30	Hyper‐Up
MergePeak_9061	TraesCS3D03G0638100	3.52889	1.48357	5.52532e-05	0.00138854	Hyper‐Up
MergePeak_20732	TraesCS7D03G0526400	3.51035	2.3942	2.80649e-09	2.03926e-07	Hyper‐Up
MergePeak_11348	TraesCS4B03G0683300	3.4949	2.6638	9.28055e-14	1.67333e-11	Hyper‐Up
MergePeak_6765	TraesCS3A03G0597200	3.48611	2.44251	1.04814e-09	8.3203e-08	Hyper‐Up
MergePeak_19616	TraesCS7B03G0283500	3.47273	1.43926	0.00316997	0.0424254	Hyper‐Up
MergePeak_2247	TraesCS1D03G0486100	3.4472	2.17862	8.37509e-09	5.48115e-07	Hyper‐Up
MergePeak_6075	TraesCS2D03G1011600	3.44065	2.71899	1.73653e-18	5.88986e-16	Hyper‐Up
MergePeak_11547	TraesCS4B03G0883300	3.4361	3.76898	1.58163e-27	1.3822e-24	Hyper‐Up
MergePeak_14727	TraesCS5B03G1136300	3.41513	1.85295	4.65408e-05	0.00119657	Hyper‐Up
MergePeak_13685	TraesCS5A03G1202000	3.41223	1.4691	0.000208353	0.00435489	Hyper‐Up
MergePeak_1304	TraesCS1B03G0581400	3.38494	2.14661	1.32655e-10	1.28168e-08	Hyper‐Up
MergePeak_9000	TraesCS3D03G0599700	3.37181	1.24592	0.00271348	0.0373624	Hyper‐Up
MergePeak_15932	TraesCS5D03G0974700	3.36893	1.27915	0.00192916	0.0282205	Hyper‐Up
MergePeak_4850	TraesCS2B03G1133800	3.36009	3.04886	8.41241e-19	2.94598e-16	Hyper‐Up
MergePeak_16014	TraesCS5D03G1059300	3.35643	3.0171	7.67281e-27	6.30757e-24	Hyper‐Up
MergePeak_18859	TraesCS7A03G0622200	3.32119	1.7482	5.78322e-06	0.000191335	Hyper‐Up
MergePeak_5951	TraesCS2D03G0883100	3.32119	1.50987	0.00123501	0.0195881	Hyper‐Up
MergePeak_1305	TraesCS1B03G0581700	3.29763	1.38207	0.00290004	0.039422	Hyper‐Up
MergePeak_12440	TraesCS4D03G0694000	3.28764	2.05259	8.18009e-05	0.00195203	Hyper‐Up
MergePeak_2846	TraesCS2A03G0055300	3.28721	3.58213	4.32944e-25	3.0655e-22	Hyper‐Up
MergePeak_1953	TraesCS1D03G0185900	3.28494	2.27757	8.62225e-15	1.87112e-12	Hyper‐Up
MergePeak_16784	TraesCS6B03G0277700	3.26968	1.19796	0.00305838	0.0411591	Hyper‐Up
MergePeak_2148	TraesCS1D03G0373400	3.26901	2.14822	5.3785e-13	8.34777e-11	Hyper‐Up
MergePeak_8495	TraesCS3D03G0118000	3.26814	1.87724	1.63293e-07	7.96386e-06	Hyper‐Up
MergePeak_19043	TraesCS7A03G0809800	3.26431	2.4029	8.90094e-11	8.90607e-09	Hyper‐Up
MergePeak_19056	TraesCS7A03G0821400	3.26098	3.69769	1.29878e-32	1.8804e-29	Hyper‐Up
MergePeak_5523	TraesCS2D03G0478400	3.24284	1.54929	3.30585e-06	0.000117392	Hyper‐Up
MergePeak_334	TraesCS1A03G0468700	3.23712	2.61364	2.20487e-12	3.02947e-10	Hyper‐Up
MergePeak_16078	TraesCS5D03G1109200	3.2257	1.82449	2.31461e-05	0.000645811	Hyper‐Up
MergePeak_141	TraesCS1A03G0241600	3.22335	1.35972	0.00212307	0.0305467	Hyper‐Up
MergePeak_7215	TraesCS3A03G1023600	3.21872	1.97927	1.42323e-10	1.36964e-08	Hyper‐Up
MergePeak_2545	TraesCS1D03G0738900	3.1899	1.35038	0.000473237	0.00875899	Hyper‐Up
MergePeak_14061	TraesCS5B03G0392700	3.17242	2.13156	2.61485e-07	1.21427e-05	Hyper‐Up
MergePeak_13711	TraesCS5A03G1228900	3.16646	1.813	9.57058e-07	3.88445e-05	Hyper‐Up
MergePeak_20129	TraesCS7B03G0801200	3.16646	1.57902	0.00291507	0.039582	Hyper‐Up
MergePeak_10256	TraesCS4A03G0676300	3.16583	1.55057	5.75507e-06	0.000190664	Hyper‐Up
MergePeak_8173	TraesCS3B03G1029000	3.16486	2.14401	9.88642e-05	0.00228993	Hyper‐Up
MergePeak_12442	TraesCS4D03G0696000	3.15977	1.54645	1.98724e-05	0.000566638	Hyper‐Up
MergePeak_20694	TraesCS7D03G0495900	3.13486	1.55475	8.5963e-06	0.000269321	Hyper‐Up
MergePeak_553	TraesCS1A03G0659500	3.1307	2.58728	3.14937e-10	2.79507e-08	Hyper‐Up
MergePeak_3636	TraesCS2A03G0922900	3.12807	2.6595	1.78444e-13	3.0475e-11	Hyper‐Up
MergePeak_8644	TraesCS3D03G0297300	3.10916	2.10979	8.83047e-08	4.62522e-06	Hyper‐Up
MergePeak_355	TraesCS1A03G0492600	3.10533	1.41098	0.000144681	0.00317094	Hyper‐Up
MergePeak_8406	TraesCS3B03G1474400	3.09718	1.32613	0.00183966	0.0271497	Hyper‐Up
MergePeak_15827	TraesCS5D03G0894200	3.08697	5.70947	2.81452e-13	4.6432e-11	Hyper‐Up
MergePeak_13787	TraesCS5B03G0029300	3.08596	1.51596	0.000673389	0.0118637	Hyper‐Up
MergePeak_13175	TraesCS5A03G0664800	3.08321	1.69318	1.93338e-07	9.25238e-06	Hyper‐Up
MergePeak_10201	TraesCS4A03G0622500	3.07075	1.82704	0.000187155	0.00396999	Hyper‐Up
MergePeak_17369	TraesCS6B03G1009700	3.06713	2.92129	2.57545e-15	6.04913e-13	Hyper‐Up
MergePeak_7457	TraesCS3B03G0252300	3.06652	1.80284	1.7467e-06	6.63273e-05	Hyper‐Up
MergePeak_9296	TraesCS3D03G0841500	3.05971	1.73303	1.97647e-06	7.40538e-05	Hyper‐Up
MergePeak_5141	TraesCS2D03G0056400	3.04992	3.46273	9.29644e-24	5.27364e-21	Hyper‐Up
MergePeak_1610	TraesCS1B03G0888400	3.04149	2.06766	3.33894e-11	3.67639e-09	Hyper‐Up
MergePeak_17957	TraesCS6D03G0523500	3.04107	1.80915	3.3701e-05	0.000898854	Hyper‐Up
MergePeak_8151	TraesCS3B03G1014900	3.0401	2.33184	2.27183e-09	1.68483e-07	Hyper‐Up
MergePeak_2201	TraesCS1D03G0428700	3.03717	2.3767	5.67494e-11	5.94483e-09	Hyper‐Up
MergePeak_2764	TraesCS1D03G0973500	3.02683	2.68106	6.38693e-09	4.3017e-07	Hyper‐Up
MergePeak_7873	TraesCS3B03G0725400	3.0193	1.43368	0.00151264	0.0231038	Hyper‐Up
MergePeak_12489	TraesCS4D03G0736300	3.01478	1.51309	0.00327138	0.0435006	Hyper‐Up
MergePeak_4890	TraesCS2B03G1178800	3.01016	2.12289	7.41486e-08	3.95421e-06	Hyper‐Up
MergePeak_6240	TraesCS2D03G1278500	3.00643	1.76509	2.2213e-05	0.000623299	Hyper‐Up
MergePeak_14945	TraesCS5D03G0012000	2.99492	3.91421	2.00565e-27	1.73711e-24	Hyper‐Up
MergePeak_10043	TraesCS4A03G0460100	2.99281	1.26573	0.00211823	0.0305043	Hyper‐Up
MergePeak_16973	TraesCS6B03G0540800	2.99102	2.30648	1.01431e-11	1.24705e-09	Hyper‐Up
MergePeak_1220	TraesCS1B03G0494100	2.98363	1.25833	0.00169479	0.0254177	Hyper‐Up
MergePeak_8235	TraesCS3B03G1115100	2.98227	2.95521	5.11337e-17	1.48508e-14	Hyper‐Up
MergePeak_2132	TraesCS1D03G0358700	2.97333	1.23957	0.0017282	0.0258166	Hyper‐Up
MergePeak_9883	TraesCS4A03G0261700	2.96713	2.54107	9.61133e-09	6.21144e-07	Hyper‐Up
MergePeak_1632	TraesCS1B03G0929200	2.96321	1.79934	1.57559e-07	7.72303e-06	Hyper‐Up
MergePeak_13125	TraesCS5A03G0601000	2.96243	1.575	3.24101e-06	0.000115415	Hyper‐Up
MergePeak_11548	TraesCS4B03G0883300	2.94398	3.76898	1.58163e-27	1.3822e-24	Hyper‐Up
MergePeak_926	TraesCS1B03G0003300	2.94174	1.54901	2.40313e-06	8.80337e-05	Hyper‐Up
MergePeak_8813	TraesCS3D03G0444800	2.93385	1.60127	3.75216e-06	0.000131257	Hyper‐Up
MergePeak_13074	TraesCS5A03G0547300	2.9181	1.20162	0.00189664	0.0278296	Hyper‐Up
MergePeak_4764	TraesCS2B03G1009100	2.91301	1.23061	0.00366699	0.0478365	Hyper‐Up
MergePeak_5631	TraesCS2D03G0583400	2.91074	1.61131	9.1045e-07	3.71081e-05	Hyper‐Up
MergePeak_10267	TraesCS4A03G0683400	2.90899	1.9261	6.94501e-08	3.73445e-06	Hyper‐Up
MergePeak_14647	TraesCS5B03G1021700	2.90393	1.16748	0.00196317	0.0286197	Hyper‐Up
MergePeak_3390	TraesCS2A03G0680800	2.90084	2.55921	1.08434e-10	1.06679e-08	Hyper‐Up
MergePeak_12738	TraesCS5A03G0227600	2.89896	1.84485	6.49186e-10	5.41011e-08	Hyper‐Up
MergePeak_271	TraesCS1A03G0411300	2.89685	2.41162	1.78119e-12	2.49686e-10	Hyper‐Up
MergePeak_3852	TraesCS2A03G1180200	2.89181	4.62872	1.6518e-36	3.33816e-33	Hyper‐Up
MergePeak_8229	TraesCS3B03G1110000	2.88677	1.30764	0.000247077	0.00504154	Hyper‐Up
MergePeak_6906	TraesCS3A03G0724700	2.87639	1.85305	3.33233e-06	0.000118233	Hyper‐Up
MergePeak_19478	TraesCS7B03G0066100	2.87112	3.03871	2.2845e-16	6.13867e-14	Hyper‐Up
MergePeak_8897	TraesCS3D03G0524600	2.86895	1.34775	0.00150281	0.0229935	Hyper‐Up
MergePeak_4845	TraesCS2B03G1127800	2.86815	1.38517	0.000111573	0.0025454	Hyper‐Up
MergePeak_20481	TraesCS7D03G0210800	2.86514	2.18247	6.5049e-11	6.71993e-09	Hyper‐Up
MergePeak_20224	TraesCS7B03G0976200	2.86183	1.70808	1.16401e-05	0.000352303	Hyper‐Up
MergePeak_3663	TraesCS2A03G0950700	2.85772	3.33112	1.16452e-29	1.26925e-26	Hyper‐Up
MergePeak_17963	TraesCS6D03G0527700	2.85373	1.9256	2.97766e-06	0.000106861	Hyper‐Up
MergePeak_5420	TraesCS2D03G0388700	2.84838	3.02766	2.0827e-21	9.31013e-19	Hyper‐Up
MergePeak_3537	TraesCS2A03G0826800	2.84782	3.15096	1.36709e-21	6.28501e-19	Hyper‐Up
MergePeak_12680	TraesCS5A03G0152500	2.83062	2.44686	1.33695e-13	2.33676e-11	Hyper‐Up
MergePeak_17804	TraesCS6D03G0379400	2.83046	1.62659	0.00189782	0.0278427	Hyper‐Up
MergePeak_7017	TraesCS3A03G0835800	2.82826	1.90842	1.40103e-05	0.0004148	Hyper‐Up
MergePeak_12744	TraesCS5A03G0234700	2.82211	1.6497	1.66309e-05	0.000483739	Hyper‐Up
MergePeak_1798	TraesCS1B03G1166400	2.82176	1.57224	2.1157e-05	0.000597818	Hyper‐Up
MergePeak_2708	TraesCS1D03G0910800	2.81747	2.96389	4.2543e-25	3.03444e-22	Hyper‐Up
MergePeak_4095	TraesCS2B03G0312800	2.81706	1.20148	0.00283918	0.0387618	Hyper‐Up
MergePeak_10556	TraesCS4A03G1023400	2.8148	1.79015	4.7314e-06	0.000160533	Hyper‐Up
MergePeak_9028	TraesCS3D03G0617500	2.80688	2.40389	2.09666e-12	2.90549e-10	Hyper‐Up
MergePeak_17956	TraesCS6D03G0521700	2.80641	2.39167	4.03788e-08	2.30136e-06	Hyper‐Up
MergePeak_11554	TraesCS4B03G0885500	2.79253	1.28911	0.00218454	0.0312457	Hyper‐Up
MergePeak_5927	TraesCS2D03G0863200	2.7826	2.86441	1.12663e-16	3.12252e-14	Hyper‐Up
MergePeak_10358	TraesCS4A03G0749800	2.78241	2.19616	9.9348e-09	6.39493e-07	Hyper‐Up
MergePeak_15605	TraesCS5D03G0682000	2.77486	4.99621	3.1581e-13	5.14007e-11	Hyper‐Up
MergePeak_19614	TraesCS7B03G0283300	2.76942	1.47089	0.000259236	0.00526087	Hyper‐Up
MergePeak_319	TraesCS1A03G0455000	2.76265	2.80489	4.7904e-09	3.28426e-07	Hyper‐Up
MergePeak_19547	TraesCS7B03G0190800	2.76165	1.76684	2.4281e-05	0.000674113	Hyper‐Up
MergePeak_6156	TraesCS2D03G1146600	2.75507	2.63376	2.29061e-21	1.01926e-18	Hyper‐Up
MergePeak_17287	TraesCS6B03G0928600	2.75423	2.37849	2.14285e-12	2.96105e-10	Hyper‐Up
MergePeak_11182	TraesCS4B03G0545000	2.75279	1.98462	1.87356e-10	1.75767e-08	Hyper‐Up
MergePeak_8636	TraesCS3D03G0288200	2.75154	2.07246	4.5846e-07	2.00915e-05	Hyper‐Up
MergePeak_32	TraesCS1A03G0066600	2.74819	1.91425	5.48383e-07	2.35586e-05	Hyper‐Up
MergePeak_16021	TraesCS5D03G1062900	2.74617	1.12352	0.0028666	0.0390715	Hyper‐Up
MergePeak_6762	TraesCS3A03G0595500	2.73594	1.3548	0.00358828	0.0470249	Hyper‐Up
MergePeak_29	TraesCS1A03G0059400	2.73005	1.65143	4.54493e-07	1.99763e-05	Hyper‐Up
MergePeak_9431	TraesCS3D03G0978800	2.71345	1.40369	0.000258402	0.00524613	Hyper‐Up
MergePeak_10542	TraesCS4A03G1013000	2.71292	1.41415	0.000626356	0.0111382	Hyper‐Up
MergePeak_20127	TraesCS7B03G0799700	2.70728	1.261	0.00257777	0.0358141	Hyper‐Up
MergePeak_13502	TraesCS5A03G1012900	2.69675	1.63664	1.61348e-09	1.23434e-07	Hyper‐Up
MergePeak_5928	TraesCS2D03G0863300	2.69311	1.75325	6.02603e-06	0.000198018	Hyper‐Up
MergePeak_18584	TraesCS7A03G0307600	2.68849	2.68766	2.61828e-17	7.96188e-15	Hyper‐Up
MergePeak_8318	TraesCS3B03G1226500	2.6828	1.60923	0.00135558	0.0211648	Hyper‐Up
MergePeak_4769	TraesCS2B03G1015300	2.6683	2.30645	9.25819e-10	7.39771e-08	Hyper‐Up
MergePeak_11579	TraesCS4B03G0918900	2.65576	2.59674	2.81859e-09	2.04652e-07	Hyper‐Up
MergePeak_16363	TraesCS6A03G0282900	2.65379	1.78976	1.36374e-06	5.3256e-05	Hyper‐Up
MergePeak_8905	TraesCS3D03G0531700	2.64557	1.14686	0.00310751	0.0416758	Hyper‐Up
MergePeak_20916	TraesCS7D03G0711100	2.63461	1.16312	0.00259096	0.0359716	Hyper‐Up
MergePeak_1797	TraesCS1B03G1166400	2.62612	1.57224	2.1157e-05	0.000597818	Hyper‐Up
MergePeak_21315	TraesCS7D03G1187100	2.62502	1.65528	0.00014208	0.00312312	Hyper‐Up
MergePeak_5924	TraesCS2D03G0860200	2.62453	1.9464	4.9775e-06	0.000168471	Hyper‐Up
MergePeak_11465	TraesCS4B03G0801600	2.62272	2.16149	3.49312e-07	1.57971e-05	Hyper‐Up
MergePeak_2307	TraesCS1D03G0538800	2.60645	1.83639	1.27452e-05	0.000381584	Hyper‐Up
MergePeak_2605	TraesCS1D03G0813600	2.60523	3.16446	1.91778e-24	1.24022e-21	Hyper‐Up
MergePeak_18420	TraesCS7A03G0007800	2.59636	1.24268	0.000954591	0.0158316	Hyper‐Up
MergePeak_8074	TraesCS3B03G0937500	2.58067	1.57661	3.25559e-06	0.000115892	Hyper‐Up
MergePeak_10526	TraesCS4A03G0998200	2.57632	3.79631	1.46892e-41	4.31792e-38	Hyper‐Up
MergePeak_2548	TraesCS1D03G0742100	2.5714	1.57714	4.35717e-05	0.00112951	Hyper‐Up
MergePeak_6020	TraesCS2D03G0956200	2.57127	1.68591	5.03097e-05	0.00128124	Hyper‐Up
MergePeak_14758	TraesCS5B03G1170400	2.57045	2.79611	3.62475e-23	1.98653e-20	Hyper‐Up
MergePeak_14997	TraesCS5D03G0100400	2.56756	1.35168	0.00202956	0.0294107	Hyper‐Up
MergePeak_12624	TraesCS5A03G0039100	2.56102	1.77574	4.25123e-08	2.41585e-06	Hyper‐Up
MergePeak_8381	TraesCS3B03G1437100LC	2.55997	2.6881	2.14694e-12	2.96248e-10	Hyper‐Up
MergePeak_8381	TraesCS3B03G1437000	2.55997	1.58506	0.000797394	0.013642	Hyper‐Up
MergePeak_3391	TraesCS2A03G0680800	2.54238	2.55921	1.08434e-10	1.06679e-08	Hyper‐Up
MergePeak_1395	TraesCS1B03G0661000	2.54147	1.4903	0.00107488	0.0174798	Hyper‐Up
MergePeak_6883	TraesCS3A03G0705100	2.53421	1.28297	0.000123299	0.00276927	Hyper‐Up
MergePeak_6221	TraesCS2D03G1262600	2.53272	2.73427	9.7995e-12	1.20633e-09	Hyper‐Up
MergePeak_12240	TraesCS4D03G0504200	2.53078	1.38224	0.000363074	0.00699358	Hyper‐Up
MergePeak_13056	TraesCS5A03G0535700	2.52928	2.81893	2.43734e-15	5.7526e-13	Hyper‐Up
MergePeak_10122	TraesCS4A03G0536600	2.51776	1.34407	0.000355729	0.00686572	Hyper‐Up
MergePeak_17351	TraesCS6B03G0980200	2.50435	1.92094	3.19249e-07	1.4514e-05	Hyper‐Up
MergePeak_492	TraesCS1A03G0611000	2.49663	1.77448	1.23059e-06	4.85647e-05	Hyper‐Up
MergePeak_15313	TraesCS5D03G0407200	2.49443	1.25512	0.00156551	0.0237691	Hyper‐Up
MergePeak_10266	TraesCS4A03G0683400	2.49285	1.9261	6.94501e-08	3.73445e-06	Hyper‐Up
MergePeak_272	TraesCS1A03G0411300	2.48608	2.41162	1.78119e-12	2.49686e-10	Hyper‐Up
MergePeak_18443	TraesCS7A03G0055700LC	2.47944	1.99168	1.20245e-05	0.000362808	Hyper‐Up
MergePeak_4534	TraesCS2B03G0779300	2.47683	1.37081	0.000591141	0.0106073	Hyper‐Up
MergePeak_12472	TraesCS4D03G0720000	2.47386	1.41789	0.000734103	0.0127344	Hyper‐Up
MergePeak_1820	TraesCS1B03G1192600	2.46577	3.22897	7.90609e-18	2.50628e-15	Hyper‐Up
MergePeak_5142	TraesCS2D03G0056500	2.46444	3.56786	1.69884e-40	4.57763e-37	Hyper‐Up
MergePeak_3662	TraesCS2A03G0950700	2.46243	3.33112	1.16452e-29	1.26925e-26	Hyper‐Up
MergePeak_5675	TraesCS2D03G0630100	2.46159	2.28199	8.43875e-10	6.7933e-08	Hyper‐Up
MergePeak_1027	TraesCS1B03G0260800	2.45902	1.89044	1.10546e-07	5.64985e-06	Hyper‐Up
MergePeak_15049	TraesCS5D03G0172400	2.45898	2.15125	3.23466e-10	2.86553e-08	Hyper‐Up
MergePeak_1271	TraesCS1B03G0549500	2.45602	2.23519	3.97859e-06	0.000138094	Hyper‐Up
MergePeak_2295	TraesCS1D03G0523300	2.44088	1.7723	6.89056e-05	0.00168535	Hyper‐Up
MergePeak_6847	TraesCS3A03G0676500	2.43556	1.51951	0.000536452	0.0097754	Hyper‐Up
MergePeak_12730	TraesCS5A03G0219300	2.43429	2.18693	1.4913e-05	0.000439169	Hyper‐Up
MergePeak_14751	TraesCS5B03G1167200	2.43232	2.16574	3.45247e-06	0.000121828	Hyper‐Up
MergePeak_2977	TraesCS2A03G0239500	2.43074	1.3655	0.000969477	0.0160538	Hyper‐Up
MergePeak_11595	TraesCS4B03G0955300	2.43041	1.80905	5.16281e-06	0.000173954	Hyper‐Up
MergePeak_9617	TraesCS4A03G0035600	2.4207	3.38291	1.17376e-22	5.93018e-20	Hyper‐Up
MergePeak_10278	TraesCS4A03G0695000	2.41285	1.68339	6.43657e-07	2.73094e-05	Hyper‐Up
MergePeak_11285	TraesCS4B03G0624400	2.41285	1.23571	0.000764635	0.0131582	Hyper‐Up
MergePeak_9356	TraesCS3D03G0906100	2.39709	2.25305	1.8086e-13	3.07252e-11	Hyper‐Up
MergePeak_14358	TraesCS5B03G0678400LC	2.38257	2.28238	7.35536e-05	0.00178108	Hyper‐Up
MergePeak_18455	TraesCS7A03G0072700	2.37946	2.44128	1.25527e-14	2.65286e-12	Hyper‐Up
MergePeak_6334	TraesCS3A03G0137900	2.3724	1.60371	0.000136987	0.00302557	Hyper‐Up
MergePeak_365	TraesCS1A03G0502600	2.36738	2.10728	7.91577e-11	8.02908e-09	Hyper‐Up
MergePeak_18446	TraesCS7A03G0064400	2.36642	1.2618	0.00078471	0.0134535	Hyper‐Up
MergePeak_18243	TraesCS6D03G0740700	2.3651	1.81567	1.96348e-06	7.36525e-05	Hyper‐Up
MergePeak_10617	TraesCS4A03G1233500	2.36062	1.54631	0.000445907	0.00832462	Hyper‐Up
MergePeak_3381	TraesCS2A03G0672700	2.35715	1.87515	4.54843e-07	1.99826e-05	Hyper‐Up
MergePeak_6388	TraesCS3A03G0205100	2.35634	1.82253	7.34548e-06	0.000234929	Hyper‐Up
MergePeak_8434	TraesCS3D03G0013200	2.35178	2.29203	1.36008e-09	1.05885e-07	Hyper‐Up
MergePeak_16929	TraesCS6B03G0482900	2.34737	3.5053	2.86941e-14	5.6805e-12	Hyper‐Up
MergePeak_19537	TraesCS7B03G0178500	2.34379	1.48461	0.0020051	0.0291172	Hyper‐Up
MergePeak_9411	TraesCS3D03G0954600	2.34194	2.4899	3.44733e-09	2.44806e-07	Hyper‐Up
MergePeak_18706	TraesCS7A03G0473300	2.33239	1.65109	0.000179392	0.00382371	Hyper‐Up
MergePeak_8468	TraesCS3D03G0089300	2.32521	3.48714	5.07339e-25	3.49035e-22	Hyper‐Up
MergePeak_4506	TraesCS2B03G0753100	2.32198	1.73734	1.01348e-07	5.23212e-06	Hyper‐Up
MergePeak_16128	TraesCS5D03G1163900	2.31862	2.41224	7.49397e-11	7.61199e-09	Hyper‐Up
MergePeak_8707	TraesCS3D03G0359700	2.31819	1.76402	2.18434e-06	8.10904e-05	Hyper‐Up
MergePeak_17788	TraesCS6D03G0363100	2.31119	2.00786	3.80326e-12	5.00585e-10	Hyper‐Up
MergePeak_16028	TraesCS5D03G1074900	2.30774	5.2343	7.12535e-61	7.82532e-57	Hyper‐Up
MergePeak_4124	TraesCS2B03G0351400	2.30628	1.84472	0.00013819	0.00304728	Hyper‐Up
MergePeak_4948	TraesCS2B03G1283600	2.30142	2.13437	2.85227e-06	0.000102703	Hyper‐Up
MergePeak_13067	TraesCS5A03G0543900	2.28667	1.54473	3.26743e-06	0.000116214	Hyper‐Up
MergePeak_91	TraesCS1A03G0193000	2.28364	2.12622	7.44608e-12	9.33203e-10	Hyper‐Up
MergePeak_15451	TraesCS5D03G0511400	2.27979	2.77189	1.11368e-20	4.57759e-18	Hyper‐Up
MergePeak_5759	TraesCS2D03G0695700	2.27755	2.0496	2.50462e-08	1.48871e-06	Hyper‐Up
MergePeak_17498	TraesCS6B03G1211100	2.27752	1.75439	1.21515e-08	7.65938e-07	Hyper‐Up
MergePeak_12275	TraesCS4D03G0532200	2.27402	1.74776	1.47258e-06	5.71386e-05	Hyper‐Up
MergePeak_4602	TraesCS2B03G0839500	2.27378	1.97381	1.17021e-07	5.93696e-06	Hyper‐Up
MergePeak_20537	TraesCS7D03G0291500	2.27065	2.16355	1.03864e-09	8.25164e-08	Hyper‐Up
MergePeak_13351	TraesCS5A03G0878700	2.26911	1.60451	8.8517e-06	0.000276627	Hyper‐Up
MergePeak_3693	TraesCS2A03G0980800LC	2.26748	1.37436	0.00374088	0.0486088	Hyper‐Up
MergePeak_5245	TraesCS2D03G0227500	2.26483	1.85982	7.36491e-08	3.9384e-06	Hyper‐Up
MergePeak_5826	TraesCS2D03G0755300	2.26224	1.80795	3.69805e-05	0.000977015	Hyper‐Up
MergePeak_2778	TraesCS1D03G0988400	2.25302	1.56906	0.0012629	0.0199489	Hyper‐Up
MergePeak_20715	TraesCS7D03G0513200	2.2476	1.87964	8.48571e-06	0.000266305	Hyper‐Up
MergePeak_9465	TraesCS3D03G1052000	2.24721	2.40634	7.52477e-13	1.13697e-10	Hyper‐Up
MergePeak_16001	TraesCS5D03G1056200	2.23915	2.54782	2.9864e-13	4.89345e-11	Hyper‐Up
MergePeak_20401	TraesCS7D03G0069600	2.22074	2.12277	3.48152e-13	5.63808e-11	Hyper‐Up
MergePeak_15881	TraesCS5D03G0929900	2.22052	1.6368	6.15893e-08	3.36397e-06	Hyper‐Up
MergePeak_11914	TraesCS4D03G0190300	2.21337	1.19973	0.00170319	0.02552	Hyper‐Up
MergePeak_7454	TraesCS3B03G0246300	2.21035	1.72454	1.54518e-07	7.59314e-06	Hyper‐Up
MergePeak_3514	TraesCS2A03G0801900	2.19543	1.49725	0.000938557	0.0156191	Hyper‐Up
MergePeak_9510	TraesCS3D03G1138800	2.19366	1.57537	3.05348e-05	0.000823067	Hyper‐Up
MergePeak_7558	TraesCS3B03G0409400	2.19157	1.48227	0.00247864	0.0346602	Hyper‐Up
MergePeak_21221	TraesCS7D03G1034200	2.18724	1.81129	6.88225e-07	2.89383e-05	Hyper‐Up
MergePeak_5818	TraesCS2D03G0751400	2.18637	1.67112	9.02374e-06	0.000281211	Hyper‐Up
MergePeak_3901	TraesCS2A03G1259700	2.18223	2.06203	6.9671e-09	4.64173e-07	Hyper‐Up
MergePeak_15860	TraesCS5D03G0913400	2.18206	1.91222	3.4764e-06	0.000122583	Hyper‐Up
MergePeak_8124	TraesCS3B03G0983100	2.1805	1.9045	7.34617e-07	3.06762e-05	Hyper‐Up
MergePeak_9158	TraesCS3D03G0708200	2.16659	1.75336	5.96832e-06	0.000196521	Hyper‐Up
MergePeak_18182	TraesCS6D03G0688600	2.16536	1.37135	0.000180599	0.00384268	Hyper‐Up
MergePeak_15693	TraesCS5D03G0747200	2.15965	1.67003	3.56444e-07	1.60672e-05	Hyper‐Up
MergePeak_4123	TraesCS2B03G0351400	2.15333	1.84472	0.00013819	0.00304728	Hyper‐Up
MergePeak_12135	TraesCS4D03G0428100	2.1377	1.34902	0.00021165	0.00441429	Hyper‐Up
MergePeak_13788	TraesCS5B03G0030200	2.13484	1.71244	1.72721e-07	8.36474e-06	Hyper‐Up
MergePeak_18357	TraesCS6D03G0874500	2.13298	2.53244	4.44708e-07	1.95639e-05	Hyper‐Up
MergePeak_6923	TraesCS3A03G0737300	2.12951	2.53777	7.03028e-15	1.53596e-12	Hyper‐Up
MergePeak_9319	TraesCS3D03G0866600	2.12733	2.27955	5.55972e-16	1.44202e-13	Hyper‐Up
MergePeak_17975	TraesCS6D03G0532500	2.12649	2.15356	2.44355e-10	2.23081e-08	Hyper‐Up
MergePeak_11118	TraesCS4B03G0486500	2.11966	1.53148	2.12946e-05	0.000600659	Hyper‐Up
MergePeak_7972	TraesCS3B03G0831500	2.11892	2.43768	4.2383e-09	2.94086e-07	Hyper‐Up
MergePeak_11944	TraesCS4D03G0223200	2.11645	1.75006	2.11861e-08	1.27887e-06	Hyper‐Up
MergePeak_12997	TraesCS5A03G0484700	2.11402	2.7128	1.73728e-10	1.64413e-08	Hyper‐Up
MergePeak_4056	TraesCS2B03G0236700	2.11151	1.39553	3.50732e-05	0.000930591	Hyper‐Up
MergePeak_16487	TraesCS6A03G0442500	2.10495	1.90486	2.86981e-07	1.31872e-05	Hyper‐Up
MergePeak_14955	TraesCS5D03G0035100	2.09281	1.31584	0.00331511	0.0439977	Hyper‐Up
MergePeak_13703	TraesCS5A03G1218900	2.09246	1.98341	9.95433e-06	0.000306694	Hyper‐Up
MergePeak_16785	TraesCS6B03G0277700	2.09116	1.19796	0.00305838	0.0411591	Hyper‐Up
MergePeak_11742	TraesCS4D03G0065600	2.08899	1.22891	0.00160954	0.0243195	Hyper‐Up
MergePeak_17617	TraesCS6D03G0161200	2.08013	1.55113	1.73462e-06	6.59347e-05	Hyper‐Up
MergePeak_21024	TraesCS7D03G0805700	2.07845	3.04148	1.54424e-20	6.21567e-18	Hyper‐Up
MergePeak_17471	TraesCS6B03G1164600	2.06776	1.66265	0.00106787	0.0174038	Hyper‐Up
MergePeak_9249	TraesCS3D03G0791000	2.0673	1.33272	0.00014963	0.0032654	Hyper‐Up
MergePeak_17358	TraesCS6B03G0990400	2.05768	1.59046	1.6371e-05	0.000476922	Hyper‐Up
MergePeak_5254	TraesCS2D03G0234900	2.04946	1.90441	8.3626e-07	3.44023e-05	Hyper‐Up
MergePeak_399	TraesCS1A03G0529400	2.03335	1.27563	0.000381401	0.00729013	Hyper‐Up
MergePeak_15055	TraesCS5D03G0176300	2.03193	2.25249	4.73167e-08	2.6562e-06	Hyper‐Up
MergePeak_20133	TraesCS7B03G0808300	2.02227	1.58753	1.74618e-05	0.00050563	Hyper‐Up
MergePeak_18000	TraesCS6D03G0552400	2.02192	1.70852	2.01174e-05	0.000572445	Hyper‐Up
MergePeak_11394	TraesCS4B03G0722800	2.02138	1.48532	6.63246e-06	0.000215104	Hyper‐Up
MergePeak_5093	TraesCS2B03G1507800	2.00561	1.16416	0.00364805	0.0476344	Hyper‐Up
MergePeak_18265	TraesCS6D03G0780300	2.00463	2.37256	1.82996e-14	3.75292e-12	Hyper‐Up
MergePeak_14651	TraesCS5B03G1027300	2.00088	1.70654	7.21466e-08	3.86444e-06	Hyper‐Up
MergePeak_8514	TraesCS3D03G0151800	2.00026	1.81863	1.28279e-08	8.05657e-07	Hyper‐Up
MergePeak_13272	TraesCS5A03G0770000	1.99769	2.23383	1.65271e-08	1.01532e-06	Hyper‐Up
MergePeak_1900	TraesCS1D03G0064400	1.98879	2.79053	6.29485e-19	2.26158e-16	Hyper‐Up
MergePeak_1897	TraesCS1D03G0060100	1.98802	1.36016	0.00261286	0.036229	Hyper‐Up
MergePeak_4800	TraesCS2B03G1062100	1.98347	1.4302	0.000215816	0.00448864	Hyper‐Up
MergePeak_4202	TraesCS2B03G0444000	1.98042	1.34861	0.00119718	0.0190974	Hyper‐Up
MergePeak_17117	TraesCS6B03G0753700	1.97939	1.49904	0.00231466	0.032764	Hyper‐Up
MergePeak_18421	TraesCS7A03G0008400	1.97787	1.43537	3.69793e-05	0.000977015	Hyper‐Up
MergePeak_21385	TraesCS7D03G1298600LC	1.97099	1.39298	0.000751287	0.0129584	Hyper‐Up
MergePeak_8558	TraesCS3D03G0215400	1.96929	1.55641	4.75305e-05	0.00121749	Hyper‐Up
MergePeak_11395	TraesCS4B03G0722900	1.96696	3.0655	7.6778e-15	1.6699e-12	Hyper‐Up
MergePeak_11493	TraesCS4B03G0824600	1.96696	1.54787	0.00284762	0.03884	Hyper‐Up
MergePeak_15501	TraesCS5D03G0558300	1.96575	1.37455	0.000157941	0.00342214	Hyper‐Up
MergePeak_17200	TraesCS6B03G0843400	1.96305	1.32446	0.00016071	0.00347436	Hyper‐Up
MergePeak_2647	TraesCS1D03G0854800	1.95771	1.50874	0.000777031	0.0133481	Hyper‐Up
MergePeak_3009	TraesCS2A03G0270300	1.95115	1.35849	0.000711299	0.0124188	Hyper‐Up
MergePeak_6112	TraesCS2D03G1093700	1.94837	1.39372	0.00125039	0.0197867	Hyper‐Up
MergePeak_1318	TraesCS1B03G0588300	1.93557	1.46398	0.00139193	0.0216244	Hyper‐Up
MergePeak_10678	TraesCS4B03G0041100	1.93012	1.30045	0.000488984	0.00901023	Hyper‐Up
MergePeak_6924	TraesCS3A03G0737300	1.92826	2.53777	7.03028e-15	1.53596e-12	Hyper‐Up
MergePeak_19613	TraesCS7B03G0282300	1.92652	1.80059	1.28395e-05	0.00038417	Hyper‐Up
MergePeak_14459	TraesCS5B03G0782600	1.92487	1.43821	8.96381e-05	0.00210641	Hyper‐Up
MergePeak_20847	TraesCS7D03G0645100	1.92417	1.22653	0.00184094	0.0271644	Hyper‐Up
MergePeak_1485	TraesCS1B03G0734800	1.91897	1.66711	5.13328e-05	0.00130353	Hyper‐Up
MergePeak_14457	TraesCS5B03G0779000	1.91172	1.78101	2.50913e-06	9.15096e-05	Hyper‐Up
MergePeak_20933	TraesCS7D03G0727300	1.90812	2.37563	2.41099e-12	3.29867e-10	Hyper‐Up
MergePeak_3653	TraesCS2A03G0940000	1.90362	2.08647	2.2535e-06	8.31172e-05	Hyper‐Up
MergePeak_1769	TraesCS1B03G1104400	1.89774	2.84026	1.13095e-19	4.26875e-17	Hyper‐Up
MergePeak_21168	TraesCS7D03G0959700	1.89438	1.96512	3.13033e-08	1.82156e-06	Hyper‐Up
MergePeak_12415	TraesCS4D03G0676000	1.89376	1.42929	0.000422758	0.00796915	Hyper‐Up
MergePeak_3661	TraesCS2A03G0950600	1.88971	2.32619	6.74841e-06	0.000218062	Hyper‐Up
MergePeak_11482	TraesCS4B03G0811300	1.8873	2.20566	3.61325e-10	3.17769e-08	Hyper‐Up
MergePeak_6064	TraesCS2D03G0994900	1.88168	1.4828	2.7358e-05	0.000746929	Hyper‐Up
MergePeak_10061	TraesCS4A03G0486800LC	1.87687	1.9341	1.80364e-05	0.000520252	Hyper‐Up
MergePeak_11189	TraesCS4B03G0552400	1.86673	1.73324	0.000508749	0.00933787	Hyper‐Up
MergePeak_1944	TraesCS1D03G0171100	1.8647	1.47875	1.93319e-05	0.000553016	Hyper‐Up
MergePeak_9857	TraesCS4A03G0238700	1.85635	1.6707	0.000119659	0.00269876	Hyper‐Up
MergePeak_53	TraesCS1A03G0117100	1.85425	1.6804	0.00270583	0.0372889	Hyper‐Up
MergePeak_9118	TraesCS3D03G0682900	1.8524	1.31646	0.000913062	0.0152734	Hyper‐Up
MergePeak_3787	TraesCS2A03G1099800	1.84734	1.57175	7.64846e-07	3.17472e-05	Hyper‐Up
MergePeak_13207	TraesCS5A03G0701200	1.84449	1.85427	5.72005e-08	3.15624e-06	Hyper‐Up
MergePeak_10600	TraesCS4A03G1141700	1.84423	1.51749	6.85235e-05	0.00167878	Hyper‐Up
MergePeak_13583	TraesCS5A03G1101500	1.8436	2.72047	1.86726e-20	7.4848e-18	Hyper‐Up
MergePeak_2710	TraesCS1D03G0913500	1.83716	1.61215	0.000230572	0.00475274	Hyper‐Up
MergePeak_6268	TraesCS2D03G1339300	1.83326	2.65436	5.39677e-13	8.34942e-11	Hyper‐Up
MergePeak_20293	TraesCS7B03G1133900	1.83319	1.52726	0.000205777	0.00430754	Hyper‐Up
MergePeak_17890	TraesCS6D03G0473900	1.83319	1.27493	3.16424e-05	0.000850259	Hyper‐Up
MergePeak_14249	TraesCS5B03G0540200	1.82991	1.69933	4.65757e-07	2.03593e-05	Hyper‐Up
MergePeak_17128	TraesCS6B03G0765400	1.82034	2.05814	3.59671e-11	3.92458e-09	Hyper‐Up
MergePeak_980	TraesCS1B03G0152600	1.81574	2.32344	3.99475e-10	3.47852e-08	Hyper‐Up
MergePeak_15824	TraesCS5D03G0892800	1.81151	1.63368	1.52494e-05	0.000447478	Hyper‐Up
MergePeak_9901	TraesCS4A03G0280400	1.80921	1.55432	4.54228e-06	0.000155093	Hyper‐Up
MergePeak_14428	TraesCS5B03G0759400	1.80854	1.53732	0.000106243	0.00243813	Hyper‐Up
MergePeak_19892	TraesCS7B03G0575300	1.80538	2.60029	6.81862e-11	6.9993e-09	Hyper‐Up
MergePeak_21009	TraesCS7D03G0798300	1.79653	1.87409	3.19295e-07	1.4514e-05	Hyper‐Up
MergePeak_10474	TraesCS4A03G0902200	1.79492	2.81488	1.12095e-15	2.79121e-13	Hyper‐Up
MergePeak_11200	TraesCS4B03G0557600	1.79347	2.64589	1.69031e-14	3.50357e-12	Hyper‐Up
MergePeak_7987	TraesCS3B03G0844300	1.78871	2.37503	4.93658e-15	1.11624e-12	Hyper‐Up
MergePeak_12721	TraesCS5A03G0211000	1.78302	1.90511	3.60608e-07	1.62398e-05	Hyper‐Up
MergePeak_1717	TraesCS1B03G1029200	1.78277	1.44579	0.000351331	0.00679165	Hyper‐Up
MergePeak_6892	TraesCS3A03G0714000	1.77963	2.78054	6.79245e-17	1.93793e-14	Hyper‐Up
MergePeak_19623	TraesCS7B03G0294600	1.77656	1.92391	1.99378e-11	2.30521e-09	Hyper‐Up
MergePeak_10257	TraesCS4A03G0676600LC	1.76924	1.33837	0.000186704	0.00396215	Hyper‐Up
MergePeak_19684	TraesCS7B03G0352200	1.76368	1.88928	2.025e-06	7.56966e-05	Hyper‐Up
MergePeak_750	TraesCS1A03G0869900	1.75873	2.25556	1.03913e-07	5.3422e-06	Hyper‐Up
MergePeak_2462	TraesCS1D03G0648800	1.74757	2.1153	1.52778e-09	1.1734e-07	Hyper‐Up
MergePeak_17869	TraesCS6D03G0457800	1.7418	1.52365	7.67565e-05	0.00184848	Hyper‐Up
MergePeak_7266	TraesCS3A03G1145800	1.73916	1.58617	7.98649e-05	0.00191148	Hyper‐Up
MergePeak_19573	TraesCS7B03G0229800	1.7321	1.47531	4.33398e-06	0.00014903	Hyper‐Up
MergePeak_11414	TraesCS4B03G0756100	1.71765	1.83959	9.08484e-10	7.27717e-08	Hyper‐Up
MergePeak_12411	TraesCS4D03G0669100	1.71607	1.7217	1.20928e-07	6.11598e-06	Hyper‐Up
MergePeak_16277	TraesCS6A03G0188400	1.71382	1.80317	6.62032e-07	2.79825e-05	Hyper‐Up
MergePeak_18472	TraesCS7A03G0126100	1.7088	2.1996	1.27753e-12	1.8524e-10	Hyper‐Up
MergePeak_20740	TraesCS7D03G0537900	1.7055	1.62637	6.2406e-05	0.00154785	Hyper‐Up
MergePeak_196	TraesCS1A03G0309300	1.7032	1.3638	0.000472631	0.00875112	Hyper‐Up
MergePeak_5149	TraesCS2D03G0064900	1.69776	2.25933	4.76893e-14	9.01764e-12	Hyper‐Up
MergePeak_8099	TraesCS3B03G0964400	1.6968	1.1817	0.00306897	0.0412673	Hyper‐Up
MergePeak_17789	TraesCS6D03G0363400	1.68707	2.97957	2.00761e-16	5.43984e-14	Hyper‐Up
MergePeak_17312	TraesCS6B03G0947300	1.68497	2.84747	3.69125e-17	1.095e-14	Hyper‐Up
MergePeak_18084	TraesCS6D03G0618800	1.684	1.37991	0.000678405	0.011939	Hyper‐Up
MergePeak_9858	TraesCS4A03G0238700	1.67602	1.6707	0.000119659	0.00269876	Hyper‐Up
MergePeak_6092	TraesCS2D03G1042800	1.67511	1.66107	6.68091e-07	2.81894e-05	Hyper‐Up
MergePeak_9274	TraesCS3D03G0816100	1.67335	1.96564	1.1967e-08	7.57241e-07	Hyper‐Up
MergePeak_255	TraesCS1A03G0393100	1.66517	2.99974	5.93925e-21	2.49407e-18	Hyper‐Up
MergePeak_14266	TraesCS5B03G0557800	1.6602	1.82975	2.13271e-08	1.28657e-06	Hyper‐Up
MergePeak_6125	TraesCS2D03G1101000	1.63594	2.22028	1.84707e-10	1.73617e-08	Hyper‐Up
MergePeak_11463	TraesCS4B03G0799600	1.63487	1.36274	0.00118107	0.0188776	Hyper‐Up
MergePeak_723	TraesCS1A03G0845500	1.63322	2.97958	7.73882e-23	4.01442e-20	Hyper‐Up
MergePeak_12029	TraesCS4D03G0304800	1.62948	1.62068	6.53679e-05	0.00160929	Hyper‐Up
MergePeak_7874	TraesCS3B03G0725400	1.62927	1.43368	0.00151264	0.0231038	Hyper‐Up
MergePeak_12745	TraesCS5A03G0234700	1.6187	1.6497	1.66309e-05	0.000483739	Hyper‐Up
MergePeak_12599	TraesCS5A03G0008900	1.60851	1.60586	1.0881e-05	0.000332128	Hyper‐Up
MergePeak_18585	TraesCS7A03G0307600	1.60544	2.68766	2.61828e-17	7.96188e-15	Hyper‐Up
MergePeak_13381	TraesCS5A03G0901900	1.60191	1.85275	2.61633e-06	9.50897e-05	Hyper‐Up
MergePeak_11411	TraesCS4B03G0750200	1.60007	1.80124	5.83619e-08	3.20756e-06	Hyper‐Up
MergePeak_19983	TraesCS7B03G0671300	1.59714	1.88269	1.35883e-07	6.75961e-06	Hyper‐Up
MergePeak_7162	TraesCS3A03G0969600	1.5878	2.17253	2.07281e-10	1.92875e-08	Hyper‐Up
MergePeak_17973	TraesCS6D03G0532400	1.58477	1.28451	0.000713962	0.0124608	Hyper‐Up
MergePeak_4291	TraesCS2B03G0540500	1.58202	1.74261	3.90044e-07	1.73712e-05	Hyper‐Up
MergePeak_9364	TraesCS3D03G0911100	1.57986	1.91408	0.00058467	0.0105145	Hyper‐Up
MergePeak_21297	TraesCS7D03G1142200	1.57932	2.94404	3.60751e-22	1.76739e-19	Hyper‐Up
MergePeak_7627	TraesCS3B03G0496600	1.5786	1.24511	0.000921703	0.0153835	Hyper‐Up
MergePeak_3339	TraesCS2A03G0606900	1.57857	1.57054	1.13426e-06	4.51858e-05	Hyper‐Up
MergePeak_7346	TraesCS3B03G0006400	1.56819	1.46051	0.000388899	0.00741357	Hyper‐Up
MergePeak_16616	TraesCS6A03G0910400	1.56106	1.58518	2.94311e-06	0.000105738	Hyper‐Up
MergePeak_13395	TraesCS5A03G0912000	1.55124	1.60698	4.11043e-07	1.82401e-05	Hyper‐Up
MergePeak_7665	TraesCS3B03G0526400	1.55079	1.69231	2.11421e-05	0.000597746	Hyper‐Up
MergePeak_18484	TraesCS7A03G0138000	1.54867	1.71567	9.63905e-05	0.00224012	Hyper‐Up
MergePeak_2752	TraesCS1D03G0956000	1.54756	2.40794	1.17277e-15	2.90955e-13	Hyper‐Up
MergePeak_7425	TraesCS3B03G0214500	1.54403	1.95833	1.85106e-08	1.12718e-06	Hyper‐Up
MergePeak_11655	TraesCS4D03G0019600	1.542	4.20726	6.13882e-35	1.14517e-31	Hyper‐Up
MergePeak_1502	TraesCS1B03G0748200	1.53733	1.495	7.40068e-05	0.00179026	Hyper‐Up
MergePeak_16317	TraesCS6A03G0224800	1.53676	2.66393	7.09599e-11	7.25332e-09	Hyper‐Up
MergePeak_1002	TraesCS1B03G0212900	1.53279	1.79591	1.3359e-05	0.000397266	Hyper‐Up
MergePeak_15616	TraesCS5D03G0689100	1.52296	1.50443	8.17157e-05	0.00195096	Hyper‐Up
MergePeak_18787	TraesCS7A03G0552300	1.51366	2.55516	1.73562e-14	3.56726e-12	Hyper‐Up
MergePeak_10519	TraesCS4A03G0985700	1.50572	1.26728	0.00249447	0.0348464	Hyper‐Up
MergePeak_1775	TraesCS1B03G1120700	1.50414	1.60597	4.8008e-05	0.0012281	Hyper‐Up
MergePeak_13077	TraesCS5A03G0547600	1.49755	2.45484	5.79069e-16	1.49792e-13	Hyper‐Up
MergePeak_12739	TraesCS5A03G0227800	1.49684	1.26801	0.00218731	0.0312808	Hyper‐Up
MergePeak_17798	TraesCS6D03G0372200	1.49627	3.00012	2.51694e-17	7.67777e-15	Hyper‐Up
MergePeak_13858	TraesCS5B03G0163800	1.49298	2.39675	3.73671e-12	4.92494e-10	Hyper‐Up
MergePeak_14123	TraesCS5B03G0440800	1.49011	2.17661	1.02671e-10	1.01318e-08	Hyper‐Up
MergePeak_4039	TraesCS2B03G0218300	1.48997	1.24826	0.000725427	0.0125997	Hyper‐Up
MergePeak_495	TraesCS1A03G0613700	1.48574	1.44789	0.000206601	0.004322	Hyper‐Up
MergePeak_8038	TraesCS3B03G0885000	1.47806	1.87138	1.15801e-08	7.34192e-07	Hyper‐Up
MergePeak_14192	TraesCS5B03G0483900	1.47773	2.76654	1.01758e-10	1.00621e-08	Hyper‐Up
MergePeak_18046	TraesCS6D03G0597500	1.47596	1.32618	0.0013189	0.0206853	Hyper‐Up
MergePeak_19544	TraesCS7B03G0187800	1.47396	1.51328	4.63554e-05	0.00119306	Hyper‐Up
MergePeak_15907	TraesCS5D03G0952400	1.46866	1.47324	8.92759e-06	0.00027864	Hyper‐Up
MergePeak_20412	TraesCS7D03G0094200	1.46597	1.54332	1.79661e-05	0.000518996	Hyper‐Up
MergePeak_18091	TraesCS6D03G0624200	1.46459	1.50992	0.000159349	0.00344802	Hyper‐Up
MergePeak_10632	TraesCS4B03G0003000LC	1.46365	1.49502	8.27196e-05	0.00197008	Hyper‐Up
MergePeak_4344	TraesCS2B03G0589200	1.46185	1.97522	6.00973e-10	5.06048e-08	Hyper‐Up
MergePeak_8782	TraesCS3D03G0417100	1.45931	2.24866	4.69082e-10	4.0268e-08	Hyper‐Up
MergePeak_17774	TraesCS6D03G0353000	1.45819	1.33091	0.000948814	0.015752	Hyper‐Up
MergePeak_20623	TraesCS7D03G0410800	1.45407	1.2501	0.000299449	0.00593416	Hyper‐Up
MergePeak_17644	TraesCS6D03G0205200	1.44785	1.67132	6.05836e-08	3.32026e-06	Hyper‐Up
MergePeak_12384	TraesCS4D03G0637000	1.44657	1.22491	0.00111535	0.0180203	Hyper‐Up
MergePeak_17750	TraesCS6D03G0332900	1.44075	2.51597	9.73502e-10	7.75954e-08	Hyper‐Up
MergePeak_14486	TraesCS5B03G0823900	1.44037	1.72026	2.7289e-08	1.6053e-06	Hyper‐Up
MergePeak_9112	TraesCS3D03G0680700LC	1.43994	2.04114	1.06238e-10	1.04731e-08	Hyper‐Up
MergePeak_10596	TraesCS4A03G1102900	1.43859	2.21816	8.8772e-12	1.10173e-09	Hyper‐Up
MergePeak_17587	TraesCS6D03G0101500	1.43541	1.4786	6.05979e-05	0.00150531	Hyper‐Up
MergePeak_8613	TraesCS3D03G0261500	1.42382	1.19574	0.000111777	0.00254826	Hyper‐Up
MergePeak_11943	TraesCS4D03G0223200	1.42258	1.75006	2.11861e-08	1.27887e-06	Hyper‐Up
MergePeak_6298	TraesCS3A03G0081800	1.42169	2.29337	3.42231e-14	6.65287e-12	Hyper‐Up
MergePeak_1594	TraesCS1B03G0869000	1.40971	1.54899	0.000201749	0.00423786	Hyper‐Up
MergePeak_5668	TraesCS2D03G0625500	1.40792	1.82304	1.23013e-07	6.20204e-06	Hyper‐Up
MergePeak_17927	TraesCS6D03G0497300	1.40792	1.44749	0.000330619	0.00645169	Hyper‐Up
MergePeak_8012	TraesCS3B03G0858500	1.40425	1.76599	0.000344862	0.00668603	Hyper‐Up
MergePeak_16191	TraesCS6A03G0012600	1.39946	1.30617	0.00302287	0.0407774	Hyper‐Up
MergePeak_18040	TraesCS6D03G0594100	1.39942	1.70718	4.934e-07	2.14627e-05	Hyper‐Up
MergePeak_4900	TraesCS2B03G1199300	1.39393	1.81157	1.12e-08	7.12891e-07	Hyper‐Up
MergePeak_1447	TraesCS1B03G0707300	1.39091	1.43257	0.000539793	0.00982218	Hyper‐Up
MergePeak_12348	TraesCS4D03G0609400	1.38999	2.0365	4.1357e-11	4.45755e-09	Hyper‐Up
MergePeak_7771	TraesCS3B03G0649000	1.38809	1.46356	2.86494e-05	0.00077846	Hyper‐Up
MergePeak_11776	TraesCS4D03G0096100	1.38526	1.86722	3.06136e-09	2.19973e-07	Hyper‐Up
MergePeak_10538	TraesCS4A03G1010300	1.37772	1.42943	0.000387627	0.00739602	Hyper‐Up
MergePeak_8152	TraesCS3B03G1014900	1.37403	2.33184	2.27183e-09	1.68483e-07	Hyper‐Up
MergePeak_13066	TraesCS5A03G0543300	1.37082	1.56998	8.50841e-07	3.4928e-05	Hyper‐Up
MergePeak_18796	TraesCS7A03G0555500	1.36946	1.48803	0.000696607	0.0121996	Hyper‐Up
MergePeak_15444	TraesCS5D03G0507800	1.36924	1.748	6.52413e-08	3.53952e-06	Hyper‐Up
MergePeak_17514	TraesCS6B03G1228800	1.36888	1.81181	1.78929e-07	8.63097e-06	Hyper‐Up
MergePeak_19546	TraesCS7B03G0190800	1.36778	1.76684	2.4281e-05	0.000674113	Hyper‐Up
MergePeak_6893	TraesCS3A03G0714000	1.36478	2.78054	6.79245e-17	1.93793e-14	Hyper‐Up
MergePeak_16698	TraesCS6B03G0137600	1.36167	1.71853	3.03471e-08	1.76923e-06	Hyper‐Up
MergePeak_11264	TraesCS4B03G0605600	1.36117	1.64842	6.51681e-06	0.000211809	Hyper‐Up
MergePeak_1211	TraesCS1B03G0482000	1.36024	2.43268	9.36666e-15	2.01464e-12	Hyper‐Up
MergePeak_16832	TraesCS6B03G0350100	1.35774	1.51811	0.000540571	0.00983266	Hyper‐Up
MergePeak_8405	TraesCS3B03G1474400	1.35109	1.32613	0.00183966	0.0271497	Hyper‐Up
MergePeak_6750	TraesCS3A03G0585400	1.34983	1.92601	2.7553e-10	2.47936e-08	Hyper‐Up
MergePeak_2454	TraesCS1D03G0640500	1.34677	2.13446	4.6937e-11	4.99241e-09	Hyper‐Up
MergePeak_15443	TraesCS5D03G0507200	1.33949	1.14444	0.00273933	0.0376596	Hyper‐Up
MergePeak_10434	TraesCS4A03G0847600	1.33615	1.79525	3.03714e-06	0.000108714	Hyper‐Up
MergePeak_8928	TraesCS3D03G0550100	1.33558	1.32366	0.00345676	0.0455987	Hyper‐Up
MergePeak_18358	TraesCS6D03G0874700	1.33529	1.47892	2.32293e-05	0.000647882	Hyper‐Up
MergePeak_8927	TraesCS3D03G0550100	1.33191	1.32366	0.00345676	0.0455987	Hyper‐Up
MergePeak_15014	TraesCS5D03G0127000	1.3313	2.10192	2.45919e-13	4.08478e-11	Hyper‐Up
MergePeak_4203	TraesCS2B03G0444400	1.32867	1.4702	1.3285e-05	0.000395671	Hyper‐Up
MergePeak_16127	TraesCS5D03G1162000	1.32378	1.24922	0.00117866	0.0188466	Hyper‐Up
MergePeak_8457	TraesCS3D03G0069100LC	1.32332	1.26924	0.00317736	0.0425068	Hyper‐Up
MergePeak_17799	TraesCS6D03G0372200	1.32229	3.00012	2.51694e-17	7.67777e-15	Hyper‐Up
MergePeak_7012	TraesCS3A03G0830900	1.32071	1.38856	0.000388356	0.00740847	Hyper‐Up
MergePeak_9509	TraesCS3D03G1138800	1.31703	1.57537	3.05348e-05	0.000823067	Hyper‐Up
MergePeak_10631	TraesCS4B03G0003000LC	1.31638	1.49502	8.27196e-05	0.00197008	Hyper‐Up
MergePeak_10121	TraesCS4A03G0536300	1.31586	1.97632	1.16453e-10	1.13875e-08	Hyper‐Up
MergePeak_15606	TraesCS5D03G0682500	1.3097	1.83648	1.30358e-09	1.01978e-07	Hyper‐Up
MergePeak_10475	TraesCS4A03G0902500	1.30532	3.19082	5.11116e-18	1.6582e-15	Hyper‐Up
MergePeak_14173	TraesCS5B03G0468200	1.30254	1.25257	0.00152981	0.0233184	Hyper‐Up
MergePeak_2426	TraesCS1D03G0617600	1.29981	1.32611	0.000337314	0.00656516	Hyper‐Up
MergePeak_6065	TraesCS2D03G0995400	1.29596	1.98671	4.41437e-06	0.000151415	Hyper‐Up
MergePeak_14445	TraesCS5B03G0770700	1.2936	1.52135	2.84135e-06	0.000102348	Hyper‐Up
MergePeak_12252	TraesCS4D03G0515700	1.29089	2.1852	2.86512e-06	0.000103089	Hyper‐Up
MergePeak_2437	TraesCS1D03G0629500	1.28732	1.20059	0.00264206	0.0365722	Hyper‐Up
MergePeak_10477	TraesCS4A03G0902800	1.28529	1.41787	0.00195268	0.028501	Hyper‐Up
MergePeak_5011	TraesCS2B03G1370300	1.28317	1.33038	0.00105387	0.0172133	Hyper‐Up
MergePeak_5975	TraesCS2D03G0910800	1.28222	1.43188	0.000165845	0.00357027	Hyper‐Up
MergePeak_17184	TraesCS6B03G0825400	1.2795	1.54867	2.21472e-05	0.000622175	Hyper‐Up
MergePeak_13226	TraesCS5A03G0721800	1.27874	1.48443	0.00056205	0.0101529	Hyper‐Up
MergePeak_11379	TraesCS4B03G0703600	1.27513	4.26531	3.26986e-27	2.73439e-24	Hyper‐Up
MergePeak_17221	TraesCS6B03G0859500	1.27417	1.75535	3.15351e-05	0.000847895	Hyper‐Up
MergePeak_17221	TraesCS6B03G0859400	1.27417	1.62369	9.34593e-07	3.79804e-05	Hyper‐Up
MergePeak_1520	TraesCS1B03G0767900	1.2655	1.54271	0.000307161	0.0060684	Hyper‐Up
MergePeak_12192	TraesCS4D03G0468100	1.26127	1.99592	2.2601e-07	1.06375e-05	Hyper‐Up
MergePeak_8832	TraesCS3D03G0469900	1.26123	1.1986	0.0035319	0.0464025	Hyper‐Up
MergePeak_359	TraesCS1A03G0494500	1.25954	1.65454	3.71382e-07	1.66323e-05	Hyper‐Up
MergePeak_9485	TraesCS3D03G1093800	1.25826	1.52776	0.000531227	0.00969724	Hyper‐Up
MergePeak_15457	TraesCS5D03G0518400	1.25381	1.59647	0.00164596	0.0247849	Hyper‐Up
MergePeak_16480	TraesCS6A03G0429300	1.25184	2.16108	4.92451e-11	5.20935e-09	Hyper‐Up
MergePeak_20669	TraesCS7D03G0464400	1.25101	1.20115	0.000781187	0.0134121	Hyper‐Up
MergePeak_14383	TraesCS5B03G0708300	1.24926	1.78348	1.26723e-07	6.36267e-06	Hyper‐Up
MergePeak_21061	TraesCS7D03G0845200	1.24867	1.50257	0.000462502	0.00859145	Hyper‐Up
MergePeak_1826	TraesCS1B03G1211300	1.2484	1.30967	0.000768713	0.013219	Hyper‐Up
MergePeak_3770	TraesCS2A03G1068000	1.24151	2.41979	8.60668e-14	1.56345e-11	Hyper‐Up
MergePeak_10605	TraesCS4A03G1156500	1.24116	1.55346	6.30052e-06	0.000205823	Hyper‐Up
MergePeak_12347	TraesCS4D03G0608900	1.24079	1.61146	0.00087982	0.0147734	Hyper‐Up
MergePeak_8049	TraesCS3B03G0905300	1.23995	1.2374	0.00167021	0.0250877	Hyper‐Up
MergePeak_15796	TraesCS5D03G0872500	1.23537	1.51895	3.10558e-05	0.000835888	Hyper‐Up
MergePeak_20087	TraesCS7B03G0771900	1.23347	1.43549	0.000128614	0.00286939	Hyper‐Up
MergePeak_5421	TraesCS2D03G0388700	1.22844	3.02766	2.0827e-21	9.31013e-19	Hyper‐Up
MergePeak_15914	TraesCS5D03G0957800	1.2283	1.68823	1.8656e-07	8.9586e-06	Hyper‐Up
MergePeak_6624	TraesCS3A03G0450200	1.22697	2.10866	1.21237e-08	7.65158e-07	Hyper‐Up
MergePeak_10977	TraesCS4B03G0318300	1.22582	1.33554	0.000113596	0.00258305	Hyper‐Up
MergePeak_11544	TraesCS4B03G0883200	1.22581	1.65267	7.7415e-07	3.21059e-05	Hyper‐Up
MergePeak_4886	TraesCS2B03G1176900	1.22549	1.21262	0.00353219	0.0464025	Hyper‐Up
MergePeak_13116	TraesCS5A03G0595200	1.22315	1.56655	6.5672e-06	0.000213344	Hyper‐Up
MergePeak_18618	TraesCS7A03G0353100	1.22241	1.88658	2.42905e-10	2.2229e-08	Hyper‐Up
MergePeak_1501	TraesCS1B03G0748200	1.22063	1.495	7.40068e-05	0.00179026	Hyper‐Up
MergePeak_5680	TraesCS2D03G0632900	1.21931	1.71296	5.70908e-05	0.0014277	Hyper‐Up
MergePeak_578	TraesCS1A03G0676100	1.21672	1.4796	0.000157553	0.00341526	Hyper‐Up
MergePeak_8451	TraesCS3D03G0066500	1.21628	3.29716	5.61183e-15	1.25143e-12	Hyper‐Up
MergePeak_8451	TraesCS3D03G0066300	1.21628	1.70315	3.32724e-05	0.000890113	Hyper‐Up
MergePeak_5770	TraesCS2D03G0702300	1.21566	1.338	0.00194165	0.0283613	Hyper‐Up
MergePeak_3524	TraesCS2A03G0811300	1.21325	1.86634	1.39614e-07	6.92391e-06	Hyper‐Up
MergePeak_6939	TraesCS3A03G0746300	1.20697	1.45037	0.000140087	0.0030835	Hyper‐Up
MergePeak_2542	TraesCS1D03G0737600	1.2068	1.19769	0.00355083	0.0465969	Hyper‐Up
MergePeak_11654	TraesCS4D03G0019200	1.20206	1.31945	0.00332098	0.0440635	Hyper‐Up
MergePeak_20564	TraesCS7D03G0342000	1.20158	2.20074	1.69462e-11	1.98293e-09	Hyper‐Up
MergePeak_21272	TraesCS7D03G1107900	1.20062	1.73379	0.000642987	0.0114047	Hyper‐Up
MergePeak_3459	TraesCS2A03G0752200	1.1972	1.4054	0.000176771	0.00377533	Hyper‐Up
MergePeak_17757	TraesCS6D03G0341100	1.19619	1.47329	9.67348e-05	0.00224705	Hyper‐Up
MergePeak_13252	TraesCS5A03G0742000	1.19479	1.73684	2.21829e-06	8.20995e-05	Hyper‐Up
MergePeak_20921	TraesCS7D03G0713600	1.19401	1.49258	0.000722698	0.0125658	Hyper‐Up
MergePeak_15528	TraesCS5D03G0595900	1.17315	1.1941	0.00379301	0.0491828	Hyper‐Up
MergePeak_20724	TraesCS7D03G0519900	1.16819	1.55835	4.00777e-05	0.0010478	Hyper‐Up
MergePeak_10964	TraesCS4B03G0307700	1.16585	2.68914	1.31572e-10	1.27249e-08	Hyper‐Up
MergePeak_1807	TraesCS1B03G1171700	1.16323	1.73893	2.85069e-07	1.31056e-05	Hyper‐Up
MergePeak_13168	TraesCS5A03G0659900	1.16199	1.52163	7.96079e-05	0.00190674	Hyper‐Up
MergePeak_11643	TraesCS4D03G0004700	1.16194	1.61799	0.000127199	0.00284501	Hyper‐Up
MergePeak_8945	TraesCS3D03G0560000	1.16158	1.24161	0.00113687	0.0183008	Hyper‐Up
MergePeak_8385	TraesCS3B03G1444100	1.16066	1.15854	7.34736e-05	0.00177958	Hyper‐Up
MergePeak_3812	TraesCS2A03G1131700	1.15791	2.50377	2.2287e-08	1.33617e-06	Hyper‐Up
MergePeak_11659	TraesCS4D03G0020600	1.15014	2.83611	1.90456e-17	5.8465e-15	Hyper‐Up
MergePeak_10812	TraesCS4B03G0135300	1.14552	1.76103	1.12977e-08	7.17696e-07	Hyper‐Up
MergePeak_994	TraesCS1B03G0192900	1.1422	1.32538	0.000221369	0.00459134	Hyper‐Up
MergePeak_3725	TraesCS2A03G1015900	1.13532	1.41115	0.00191052	0.0280036	Hyper‐Up
MergePeak_14374	TraesCS5B03G0695200	1.13348	1.77453	1.27328e-06	5.00662e-05	Hyper‐Up
MergePeak_14336	TraesCS5B03G0646100	1.13243	1.07705	0.0030079	0.040641	Hyper‐Up
MergePeak_10551	TraesCS4A03G1017200	1.13214	2.51419	2.81162e-17	8.52309e-15	Hyper‐Up
MergePeak_9432	TraesCS3D03G0978800	1.13031	1.40369	0.000258402	0.00524613	Hyper‐Up
MergePeak_8515	TraesCS3D03G0151800	1.12786	1.81863	1.28279e-08	8.05657e-07	Hyper‐Up
MergePeak_18312	TraesCS6D03G0827000	1.12587	1.16691	0.00323063	0.0431062	Hyper‐Up
MergePeak_16630	TraesCS6A03G0969500	1.12575	1.66849	4.65087e-05	0.00119617	Hyper‐Up
MergePeak_15385	TraesCS5D03G0453200	1.12324	1.28377	0.000378861	0.00724587	Hyper‐Up
MergePeak_20411	TraesCS7D03G0094200	1.12248	1.54332	1.79661e-05	0.000518996	Hyper‐Up
MergePeak_4061	TraesCS2B03G0247700	1.1217	1.29297	0.000340961	0.00662286	Hyper‐Up
MergePeak_8789	TraesCS3D03G0422400	1.12034	1.43885	5.64361e-05	0.00141278	Hyper‐Up
MergePeak_3100	TraesCS2A03G0353000	1.11466	1.21979	0.0028088	0.038424	Hyper‐Up
MergePeak_16230	TraesCS6A03G0096800	1.10783	1.9822	5.35263e-11	5.63764e-09	Hyper‐Up
MergePeak_6494	TraesCS3A03G0330600	1.10751	1.37828	0.000634547	0.0112694	Hyper‐Up
MergePeak_8283	TraesCS3B03G1157600	1.10432	1.31173	0.000385086	0.00735766	Hyper‐Up
MergePeak_21349	TraesCS7D03G1221800	1.10374	1.44812	1.0345e-05	0.000317564	Hyper‐Up
MergePeak_15433	TraesCS5D03G0499600	1.09981	2.25146	6.38263e-12	8.04078e-10	Hyper‐Up
MergePeak_9320	TraesCS3D03G0866600	1.09914	2.27955	5.55972e-16	1.44202e-13	Hyper‐Up
MergePeak_7288	TraesCS3A03G1195600	1.09611	1.47582	0.00030998	0.00611537	Hyper‐Up
MergePeak_19533	TraesCS7B03G0173400	1.09518	1.53783	0.000276361	0.00554804	Hyper‐Up
MergePeak_11545	TraesCS4B03G0883200	1.09143	1.65267	7.7415e-07	3.21059e-05	Hyper‐Up
MergePeak_3779	TraesCS2A03G1081100	1.08704	1.64988	2.69254e-06	9.75671e-05	Hyper‐Up
MergePeak_8453	TraesCS3D03G0066700	1.0816	1.24053	0.00169622	0.0254313	Hyper‐Up
MergePeak_15530	TraesCS5D03G0600000	1.07959	3.28321	5.41722e-25	3.70065e-22	Hyper‐Up
MergePeak_21284	TraesCS7D03G1116900	1.07439	1.86356	8.73433e-07	3.57194e-05	Hyper‐Up
MergePeak_15931	TraesCS5D03G0974700	1.07015	1.27915	0.00192916	0.0282205	Hyper‐Up
MergePeak_16857	TraesCS6B03G0387800	1.06786	1.73029	1.05531e-08	6.75707e-07	Hyper‐Up
MergePeak_21218	TraesCS7D03G1033000	1.06784	1.91857	4.57528e-06	0.000155945	Hyper‐Up
MergePeak_10620	TraesCS4A03G1243900	1.0656	1.31344	0.000500216	0.00918996	Hyper‐Up
MergePeak_5577	TraesCS2D03G0523600	1.06465	1.25308	0.00304049	0.0409639	Hyper‐Up
MergePeak_17939	TraesCS6D03G0508500	1.06291	1.61869	0.000132324	0.00293989	Hyper‐Up
MergePeak_5422	TraesCS2D03G0388700	1.06126	3.02766	2.0827e-21	9.31013e-19	Hyper‐Up
MergePeak_11461	TraesCS4B03G0798300	1.06096	1.46278	0.000326473	0.00638619	Hyper‐Up
MergePeak_6359	TraesCS3A03G0170100	1.05412	1.49237	0.000110049	0.00251477	Hyper‐Up
MergePeak_5070	TraesCS2B03G1468300	1.05132	1.6923	8.91358e-07	3.63758e-05	Hyper‐Up
MergePeak_12281	TraesCS4D03G0536900	1.05015	1.74915	1.48727e-06	5.75589e-05	Hyper‐Up
MergePeak_6809	TraesCS3A03G0643700	1.04889	1.27627	0.000729395	0.0126641	Hyper‐Up
MergePeak_9693	TraesCS4A03G0112800	1.04882	1.40788	0.000545181	0.009885	Hyper‐Up
MergePeak_18115	TraesCS6D03G0641200	1.04672	1.33492	0.00122413	0.0194538	Hyper‐Up
MergePeak_17752	TraesCS6D03G0336800	1.04504	1.43053	0.00015258	0.0033238	Hyper‐Up
MergePeak_14233	TraesCS5B03G0524300	1.04349	1.39258	6.42633e-05	0.00158752	Hyper‐Up
MergePeak_3735	TraesCS2A03G1020600	1.04318	1.39249	0.000688823	0.0120982	Hyper‐Up
MergePeak_9775	TraesCS4A03G0186600	1.03927	1.51893	0.000412243	0.00779974	Hyper‐Up
MergePeak_9076	TraesCS3D03G0657400	1.03668	1.70574	4.50824e-05	0.0011637	Hyper‐Up
MergePeak_15835	TraesCS5D03G0900500	1.02819	1.47845	0.000566048	0.0102175	Hyper‐Up
MergePeak_5628	TraesCS2D03G0577600	1.02649	1.22298	0.00111129	0.0179755	Hyper‐Up
MergePeak_203	TraesCS1A03G0325400	1.021	1.30344	0.00219718	0.0313943	Hyper‐Up
MergePeak_15882	TraesCS5D03G0929900	1.0196	1.6368	6.15893e-08	3.36397e-06	Hyper‐Up
MergePeak_5862	TraesCS2D03G0794500	1.01934	1.43353	0.000218375	0.00453408	Hyper‐Up
MergePeak_3970	TraesCS2B03G0056300	1.01541	1.43165	0.000133568	0.00296287	Hyper‐Up
MergePeak_20731	TraesCS7D03G0525900	1.01539	1.90653	5.98926e-08	3.28424e-06	Hyper‐Up
MergePeak_7513	TraesCS3B03G0336200	1.01531	1.99676	1.15221e-08	7.30997e-07	Hyper‐Up
MergePeak_14139	TraesCS5B03G0447700	1.01188	1.68852	6.3812e-06	0.000207998	Hyper‐Up
MergePeak_3387	TraesCS2A03G0676600	1.01067	2.27753	6.77615e-11	6.96306e-09	Hyper‐Up
MergePeak_2887	TraesCS2A03G0120900	1.00711	1.27402	0.0024659	0.0345169	Hyper‐Up
MergePeak_10973	TraesCS4B03G0312800	1.00613	1.67773	2.04594e-06	7.64206e-05	Hyper‐Up
MergePeak_7806	TraesCS3B03G0665600	1.00387	1.59187	3.30622e-06	0.000117392	Hyper‐Up
MergePeak_15502	TraesCS5D03G0558300	1.00311	1.37455	0.000157941	0.00342214	Hyper‐Up
MergePeak_9275	TraesCS3D03G0816100	1.00248	1.96564	1.1967e-08	7.57241e-07	Hyper‐Up
MergePeak_17419	TraesCS6B03G1093300	1.00243	1.21164	0.00107088	0.0174383	Hyper‐Up
MergePeak_4319	TraesCS2B03G0560800	3.17393	-1.03284	0.00189308	0.0277815	Hyper‐Down
MergePeak_20808	TraesCS7D03G0606900	3.16553	-1.74623	1.47351e-10	1.41242e-08	Hyper‐Down
MergePeak_7129	TraesCS3A03G0942500	3.1018	-1.0921	3.53928e-05	0.000938044	Hyper‐Down
MergePeak_13413	TraesCS5A03G0927500	2.55591	-1.0429	2.04884e-06	7.64993e-05	Hyper‐Down
MergePeak_8265	TraesCS3B03G1139000	2.39102	-1.57481	1.71682e-12	2.42658e-10	Hyper‐Down
MergePeak_12965	TraesCS5A03G0460900	1.83532	-1.19986	6.93063e-05	0.00169345	Hyper‐Down
MergePeak_16691	TraesCS6B03G0118400	1.34673	-1.33796	2.71386e-14	5.41677e-12	Hyper‐Down
MergePeak_8312	TraesCS3B03G1208500	1.25158	-1.79407	6.40033e-08	3.4782e-06	Hyper‐Down
MergePeak_18336	TraesCS6D03G0853000	1.22434	-1.2383	1.16572e-07	5.9213e-06	Hyper‐Down
MergePeak_3764	TraesCS2A03G1061900	1.14139	-1.1023	8.15572e-08	4.30903e-06	Hyper‐Down
MergePeak_13250	TraesCS5A03G0741000	-4.32667	1.84395	2.10694e-06	7.84574e-05	Hypo‐Up
MergePeak_6309	TraesCS3A03G0093400LC	-3.48102	1.31964	0.000864043	0.0145716	Hypo‐Up
MergePeak_13686	TraesCS5A03G1202700	-3.35014	1.28208	0.00129263	0.0203226	Hypo‐Up
MergePeak_21137	TraesCS7D03G0910600	-3.18736	2.7044	4.59024e-22	2.21528e-19	Hypo‐Up
MergePeak_6492	TraesCS3A03G0325200	-3.14756	1.80015	0.000124408	0.00279095	Hypo‐Up
MergePeak_21136	TraesCS7D03G0910600	-2.92359	2.7044	4.59024e-22	2.21528e-19	Hypo‐Up
MergePeak_16985	TraesCS6B03G0574100	-2.68543	1.96523	0.000541447	0.0098432	Hypo‐Up
MergePeak_18210	TraesCS6D03G0708200	-2.67634	1.39236	0.00167483	0.0251455	Hypo‐Up
MergePeak_13251	TraesCS5A03G0741000	-2.65616	1.84395	2.10694e-06	7.84574e-05	Hypo‐Up
MergePeak_1295	TraesCS1B03G0574200	-2.5552	1.52495	7.05064e-06	0.000226771	Hypo‐Up
MergePeak_2568	TraesCS1D03G0777100	-2.46973	3.29158	8.3665e-24	4.80227e-21	Hypo‐Up
MergePeak_3734	TraesCS2A03G1020600	-2.41007	1.39249	0.000688823	0.0120982	Hypo‐Up
MergePeak_13035	TraesCS5A03G0517600	-2.36652	2.23967	5.88538e-07	2.51279e-05	Hypo‐Up
MergePeak_7952	TraesCS3B03G0804900	-2.20824	1.44871	0.000388929	0.00741357	Hypo‐Up
MergePeak_14455	TraesCS5B03G0777800	-2.11068	1.86811	4.16657e-08	2.37331e-06	Hypo‐Up
MergePeak_1493	TraesCS1B03G0741000	-1.85325	2.47793	4.57041e-13	7.1972e-11	Hypo‐Up
MergePeak_12670	TraesCS5A03G0135000	-1.79795	1.38587	0.00038706	0.00738706	Hypo‐Up
MergePeak_13024	TraesCS5A03G0506500	-1.76306	1.41969	0.0010417	0.0170403	Hypo‐Up
MergePeak_11380	TraesCS4B03G0705800	-1.70348	1.47089	6.17017e-06	0.00020207	Hypo‐Up
MergePeak_14337	TraesCS5B03G0646100	-1.6519	1.07705	0.0030079	0.040641	Hypo‐Up
MergePeak_543	TraesCS1A03G0652400	-1.58729	1.71303	2.042e-05	0.000579866	Hypo‐Up
MergePeak_8422	TraesCS3B03G1515300LC	-1.53124	1.8024	0.000228922	0.00472274	Hypo‐Up
MergePeak_6517	TraesCS3A03G0354000	-1.50463	1.98168	6.99669e-07	2.93937e-05	Hypo‐Up
MergePeak_20097	TraesCS7B03G0777500	-1.47035	1.43469	0.00151862	0.0231624	Hypo‐Up
MergePeak_17291	TraesCS6B03G0931600	-1.43248	1.1069	0.0020849	0.0300957	Hypo‐Up
MergePeak_19148	TraesCS7A03G0913800	-1.40559	1.51571	4.19721e-06	0.000144532	Hypo‐Up
MergePeak_11792	TraesCS4D03G0105800	-1.38924	1.52184	2.81612e-05	0.000765839	Hypo‐Up
MergePeak_20098	TraesCS7B03G0777500	-1.37514	1.43469	0.00151862	0.0231624	Hypo‐Up
MergePeak_4337	TraesCS2B03G0582200	-1.36924	1.25806	0.00256324	0.0356633	Hypo‐Up
MergePeak_395	TraesCS1A03G0528900	-1.35453	1.81079	4.69654e-06	0.000159462	Hypo‐Up
MergePeak_16223	TraesCS6A03G0080800	-1.22353	1.35623	0.000719979	0.0125365	Hypo‐Up
MergePeak_14456	TraesCS5B03G0777800	-1.21672	1.86811	4.16657e-08	2.37331e-06	Hypo‐Up
MergePeak_722	TraesCS1A03G0845500	-1.09014	2.97958	7.73882e-23	4.01442e-20	Hypo‐Up
MergePeak_8233	TraesCS3B03G1114300LC	-1.04046	1.4974	0.0031744	0.042479	Hypo‐Up
MergePeak_655	TraesCS1A03G0761900	-5.00561	-3.65239	5.69821e-51	3.45468e-47	Hypo‐Down
MergePeak_18151	TraesCS6D03G0667200	-4.74396	-1.63343	1.15202e-11	1.40039e-09	Hypo‐Down
MergePeak_8460	TraesCS3D03G0072200	-4.72142	-1.95785	8.95381e-16	2.25599e-13	Hypo‐Down
MergePeak_2673	TraesCS1D03G0873400LC	-4.66146	-2.40122	3.67824e-12	4.85447e-10	Hypo‐Down
MergePeak_2673	TraesCS1D03G0873500	-4.66146	-3.19146	4.44222e-12	5.75511e-10	Hypo‐Down
MergePeak_845	TraesCS1A03G0988100	-4.36266	-3.34386	6.03111e-49	3.07917e-45	Hypo‐Down
MergePeak_13250	TraesCS5A03G0740900LC	-4.32667	-1.90301	0.000330248	0.00644576	Hypo‐Down
MergePeak_7918	TraesCS3B03G0780100	-4.12157	-1.1314	1.65515e-11	1.94143e-09	Hypo‐Down
MergePeak_16119	TraesCS5D03G1158300	-4.09187	-1.33448	4.5315e-10	3.90732e-08	Hypo‐Down
MergePeak_20434	TraesCS7D03G0134500	-4.07313	-1.6202	4.88014e-08	2.72692e-06	Hypo‐Down
MergePeak_9609	TraesCS4A03G0028000	-4.04605	-1.12494	5.92835e-05	0.00147682	Hypo‐Down
MergePeak_5474	TraesCS2D03G0430200	-4.01056	-1.663	4.23481e-14	8.10244e-12	Hypo‐Down
MergePeak_1744	TraesCS1B03G1053200	-3.9661	-3.85602	7.25259e-50	3.9085e-46	Hypo‐Down
MergePeak_3789	TraesCS2A03G1100700	-3.91732	-1.35874	1.33631e-10	1.28982e-08	Hypo‐Down
MergePeak_1745	TraesCS1B03G1053300	-3.84927	-3.6933	4.23308e-34	6.95976e-31	Hypo‐Down
MergePeak_2539	TraesCS1D03G0732300	-3.82021	-1.35963	1.67542e-06	6.38845e-05	Hypo‐Down
MergePeak_650	TraesCS1A03G0758500	-3.79339	-1.22909	0.000776516	0.0133437	Hypo‐Down
MergePeak_3749	TraesCS2A03G1039900	-3.76981	-1.42214	9.66409e-10	7.70934e-08	Hypo‐Down
MergePeak_17132	TraesCS6B03G0771200	-3.76718	-1.22665	4.82262e-08	2.70256e-06	Hypo‐Down
MergePeak_11869	TraesCS4D03G0155400	-3.66851	-2.35445	1.61251e-15	3.95999e-13	Hypo‐Down
MergePeak_919	TraesCS1B03G0001600	-3.50619	-1.74679	5.7584e-08	3.17379e-06	Hypo‐Down
MergePeak_6024	TraesCS2D03G0959100	-3.47148	-2.90247	1.3027e-13	2.28099e-11	Hypo‐Down
MergePeak_10577	TraesCS4A03G1071200	-3.45403	-2.1005	0.000915262	0.0152962	Hypo‐Down
MergePeak_20254	TraesCS7B03G1030900	-3.45353	-1.50651	3.07931e-12	4.10874e-10	Hypo‐Down
MergePeak_8791	TraesCS3D03G0423000	-3.43997	-1.53233	0.00106095	0.0173114	Hypo‐Down
MergePeak_6823	TraesCS3A03G0656700	-3.41062	-2.33051	6.79591e-19	2.42364e-16	Hypo‐Down
MergePeak_10483	TraesCS4A03G0908400	-3.36773	-2.05757	4.56195e-11	4.86829e-09	Hypo‐Down
MergePeak_11318	TraesCS4B03G0661300	-3.34962	-1.35774	5.9138e-08	3.24837e-06	Hypo‐Down
MergePeak_14156	TraesCS5B03G0460200	-3.34742	-1.79677	2.4004e-09	1.77206e-07	Hypo‐Down
MergePeak_3511	TraesCS2A03G0800200	-3.31868	-2.31423	4.83848e-05	0.00123644	Hypo‐Down
MergePeak_993	TraesCS1B03G0190500	-3.31557	-2.24508	5.72175e-05	0.00143013	Hypo‐Down
MergePeak_10958	TraesCS4B03G0302700	-3.29175	-1.14443	2.56134e-05	0.000704525	Hypo‐Down
MergePeak_14760	TraesCS5B03G1172900	-3.25512	-1.94039	5.07426e-15	1.14205e-12	Hypo‐Down
MergePeak_12973	TraesCS5A03G0467800	-3.23524	-2.21362	0.00369426	0.0481212	Hypo‐Down
MergePeak_2899	TraesCS2A03G0132100	-3.23464	-2.59259	0.00128302	0.0202009	Hypo‐Down
MergePeak_3729	TraesCS2A03G1018600	-3.22771	-2.28498	3.71246e-11	4.02822e-09	Hypo‐Down
MergePeak_1595	TraesCS1B03G0871200	-3.22026	-3.48009	1.35263e-40	3.74888e-37	Hypo‐Down
MergePeak_21362	TraesCS7D03G1251300	-3.21572	-2.77294	2.8212e-27	2.40059e-24	Hypo‐Down
MergePeak_2672	TraesCS1D03G0873400LC	-3.19364	-2.40122	3.67824e-12	4.85447e-10	Hypo‐Down
MergePeak_13321	TraesCS5A03G0843800	-3.16619	-2.76055	9.20161e-31	1.07541e-27	Hypo‐Down
MergePeak_4284	TraesCS2B03G0532800	-3.16318	-1.47598	2.5906e-11	2.92548e-09	Hypo‐Down
MergePeak_15973	TraesCS5D03G1027800	-3.1396	-3.24708	1.46252e-42	5.06681e-39	Hypo‐Down
MergePeak_18423	TraesCS7A03G0008800	-3.13745	-1.13397	2.50148e-07	1.1666e-05	Hypo‐Down
MergePeak_19174	TraesCS7A03G0931900	-3.1315	-1.15362	2.22039e-06	8.21459e-05	Hypo‐Down
MergePeak_19733	TraesCS7B03G0396300	-3.11994	-1.48281	1.78177e-07	8.6032e-06	Hypo‐Down
MergePeak_5186	TraesCS2D03G0129100	-3.11749	-2.63281	0.000604698	0.0108146	Hypo‐Down
MergePeak_14069	TraesCS5B03G0401100	-3.10805	-1.3619	3.5194e-08	2.02609e-06	Hypo‐Down
MergePeak_19571	TraesCS7B03G0225000	-3.08922	-2.0809	1.12873e-07	5.76271e-06	Hypo‐Down
MergePeak_1802	TraesCS1B03G1168700	-3.08352	-1.12595	3.49683e-05	0.000928061	Hypo‐Down
MergePeak_2259	TraesCS1D03G0499300LC	-3.08148	-1.51771	9.65661e-08	5.0173e-06	Hypo‐Down
MergePeak_15997	TraesCS5D03G1048100	-3.05934	-1.39845	1.38369e-09	1.07551e-07	Hypo‐Down
MergePeak_14155	TraesCS5B03G0460200	-3.05903	-1.79677	2.4004e-09	1.77206e-07	Hypo‐Down
MergePeak_665	TraesCS1A03G0778700	-3.02761	-2.31752	2.91213e-05	0.000788852	Hypo‐Down
MergePeak_5435	TraesCS2D03G0397900	-3.02023	-1.00303	0.000115561	0.00262404	Hypo‐Down
MergePeak_17880	TraesCS6D03G0465200	-2.99479	-1.44152	0.000195501	0.00412358	Hypo‐Down
MergePeak_11235	TraesCS4B03G0583700	-2.9922	-1.28106	6.82903e-10	5.64743e-08	Hypo‐Down
MergePeak_5165	TraesCS2D03G0092700	-2.98127	-1.82836	7.21553e-12	9.05478e-10	Hypo‐Down
MergePeak_4023	TraesCS2B03G0179600	-2.97768	-2.52608	0.000228606	0.00471824	Hypo‐Down
MergePeak_10177	TraesCS4A03G0603000	-2.97552	-2.22218	4.3728e-19	1.58869e-16	Hypo‐Down
MergePeak_20162	TraesCS7B03G0845700	-2.95244	-1.38767	0.0024313	0.0341163	Hypo‐Down
MergePeak_61	TraesCS1A03G0139500	-2.94418	-2.26363	5.07661e-05	0.00129185	Hypo‐Down
MergePeak_20708	TraesCS7D03G0505500	-2.93742	-2.11049	4.42749e-05	0.00114499	Hypo‐Down
MergePeak_7907	TraesCS3B03G0771100	-2.9267	-1.36031	6.68161e-11	6.8805e-09	Hypo‐Down
MergePeak_13150	TraesCS5A03G0640200LC	-2.89833	-2.09887	0.000198647	0.00418085	Hypo‐Down
MergePeak_16007	TraesCS5D03G1057700	-2.83994	-1.62459	2.57839e-05	0.00070874	Hypo‐Down
MergePeak_13672	TraesCS5A03G1181200	-2.81309	-1.92291	4.28146e-28	4.07175e-25	Hypo‐Down
MergePeak_14642	TraesCS5B03G1018300	-2.7968	-1.30781	3.80168e-05	0.0010013	Hypo‐Down
MergePeak_5187	TraesCS2D03G0129300	-2.78902	-2.45075	0.000703919	0.0123098	Hypo‐Down
MergePeak_7844	TraesCS3B03G0698100	-2.78176	-1.74077	2.02759e-12	2.81783e-10	Hypo‐Down
MergePeak_20753	TraesCS7D03G0553600	-2.77624	-1.32268	4.14337e-10	3.59502e-08	Hypo‐Down
MergePeak_11661	TraesCS4D03G0022600	-2.77111	-1.4726	8.46639e-07	3.47775e-05	Hypo‐Down
MergePeak_11269	TraesCS4B03G0610800	-2.75391	-1.5531	0.00343782	0.0453903	Hypo‐Down
MergePeak_9751	TraesCS4A03G0164800	-2.72413	-1.59873	4.64745e-10	3.9931e-08	Hypo‐Down
MergePeak_9297	TraesCS3D03G0845200	-2.7231	-1.08581	9.57796e-06	0.000296553	Hypo‐Down
MergePeak_20852	TraesCS7D03G0650200	-2.70913	-1.63076	1.6195e-13	2.78543e-11	Hypo‐Down
MergePeak_7203	TraesCS3A03G1006600	-2.68197	-2.46556	5.87468e-06	0.000193635	Hypo‐Down
MergePeak_20442	TraesCS7D03G0141900	-2.66627	-1.48744	8.3796e-09	5.48115e-07	Hypo‐Down
MergePeak_15645	TraesCS5D03G0705600	-2.66362	-1.44597	4.62753e-08	2.60679e-06	Hypo‐Down
MergePeak_10509	TraesCS4A03G0963200	-2.6611	-1.19998	3.03058e-06	0.000108559	Hypo‐Down
MergePeak_13251	TraesCS5A03G0740900LC	-2.65616	-1.90301	0.000330248	0.00644576	Hypo‐Down
MergePeak_561	TraesCS1A03G0664300	-2.64952	-1.26013	2.81122e-08	1.64973e-06	Hypo‐Down
MergePeak_16064	TraesCS5D03G1100400	-2.64607	-1.57429	0.00108851	0.0176719	Hypo‐Down
MergePeak_16310	TraesCS6A03G0217100	-2.64219	-3.36557	4.88654e-23	2.61886e-20	Hypo‐Down
MergePeak_15285	TraesCS5D03G0389800	-2.63021	-2.33765	0.00112174	0.0180933	Hypo‐Down
MergePeak_14802	TraesCS5B03G1221400	-2.62298	-2.26515	1.70919e-14	3.53515e-12	Hypo‐Down
MergePeak_19475	TraesCS7B03G0057500	-2.6223	-1.0505	9.33975e-05	0.00218312	Hypo‐Down
MergePeak_1671	TraesCS1B03G0962400	-2.62198	-1.05525	3.26782e-05	0.000875425	Hypo‐Down
MergePeak_15978	TraesCS5D03G1028600	-2.60979	-1.8939	1.48587e-12	2.12589e-10	Hypo‐Down
MergePeak_10872	TraesCS4B03G0203200	-2.59269	-2.22978	5.70468e-06	0.000189318	Hypo‐Down
MergePeak_2900	TraesCS2A03G0132200	-2.56761	-2.38243	0.00192171	0.0281422	Hypo‐Down
MergePeak_16241	TraesCS6A03G0108900	-2.56403	-1.66676	8.55843e-12	1.06573e-09	Hypo‐Down
MergePeak_19673	TraesCS7B03G0342700	-2.56131	-1.9481	1.89946e-14	3.88724e-12	Hypo‐Down
MergePeak_17534	TraesCS6B03G1278500	-2.54383	-1.74202	0.000438738	0.00820816	Hypo‐Down
MergePeak_10639	TraesCS4B03G0005400	-2.53594	-1.34613	1.46225e-09	1.12934e-07	Hypo‐Down
MergePeak_5530	TraesCS2D03G0485100	-2.53053	-1.43248	4.36426e-11	4.6676e-09	Hypo‐Down
MergePeak_10653	TraesCS4B03G0021200	-2.52289	-1.15787	2.74745e-08	1.61523e-06	Hypo‐Down
MergePeak_4111	TraesCS2B03G0324800	-2.52288	-1.37309	2.90495e-12	3.89215e-10	Hypo‐Down
MergePeak_18387	TraesCS6D03G0895200	-2.51848	-1.36938	6.43084e-10	5.3731e-08	Hypo‐Down
MergePeak_21273	TraesCS7D03G1108100	-2.51585	-2.06225	5.29966e-13	8.25182e-11	Hypo‐Down
MergePeak_8280	TraesCS3B03G1156100	-2.51352	-2.23017	2.92715e-05	0.000792478	Hypo‐Down
MergePeak_18335	TraesCS6D03G0853000	-2.51245	-1.2383	1.16572e-07	5.9213e-06	Hypo‐Down
MergePeak_13107	TraesCS5A03G0584700	-2.51175	-1.8093	3.17248e-14	6.22961e-12	Hypo‐Down
MergePeak_18803	TraesCS7A03G0564000	-2.50055	-1.55245	5.41195e-10	4.59157e-08	Hypo‐Down
MergePeak_1523	TraesCS1B03G0775600LC	-2.4891	-1.28843	2.72259e-05	0.000743531	Hypo‐Down
MergePeak_18203	TraesCS6D03G0701100	-2.48361	-1.3933	3.10002e-10	2.75379e-08	Hypo‐Down
MergePeak_20426	TraesCS7D03G0117000	-2.47704	-1.57748	5.63354e-12	7.14348e-10	Hypo‐Down
MergePeak_9388	TraesCS3D03G0936800	-2.47311	-2.29787	1.73973e-05	0.000504215	Hypo‐Down
MergePeak_9329	TraesCS3D03G0875400	-2.47252	-1.03804	8.20206e-06	0.000258582	Hypo‐Down
MergePeak_15093	TraesCS5D03G0218100	-2.47228	-1.66956	9.32719e-08	4.867e-06	Hypo‐Down
MergePeak_16190	TraesCS6A03G0011900	-2.47027	-1.77923	1.49196e-09	1.14862e-07	Hypo‐Down
MergePeak_14725	TraesCS5B03G1135900	-2.46949	-3.17668	5.76329e-33	9.01713e-30	Hypo‐Down
MergePeak_2974	TraesCS2A03G0235700	-2.46236	-1.28291	4.09015e-10	3.55202e-08	Hypo‐Down
MergePeak_16292	TraesCS6A03G0197800	-2.45224	-1.70115	3.21648e-12	4.27413e-10	Hypo‐Down
MergePeak_17690	TraesCS6D03G0272300	-2.44774	-1.3872	1.89415e-08	1.15126e-06	Hypo‐Down
MergePeak_13698	TraesCS5A03G1208500	-2.44194	-1.09578	1.97295e-06	7.39507e-05	Hypo‐Down
MergePeak_11183	TraesCS4B03G0547000	-2.43821	-1.36589	7.12393e-10	5.85139e-08	Hypo‐Down
MergePeak_4640	TraesCS2B03G0885800	-2.43608	-2.11541	0.000107689	0.00246724	Hypo‐Down
MergePeak_2549	TraesCS1D03G0745400	-2.43394	-2.42734	1.22661e-05	0.000368835	Hypo‐Down
MergePeak_15092	TraesCS5D03G0218100	-2.43057	-1.66956	9.32719e-08	4.867e-06	Hypo‐Down
MergePeak_15863	TraesCS5D03G0915300	-2.42915	-1.61457	4.73164e-12	6.08737e-10	Hypo‐Down
MergePeak_16936	TraesCS6B03G0493800	-2.4285	-2.2897	4.28392e-21	1.83875e-18	Hypo‐Down
MergePeak_16936	TraesCS6B03G0493900LC	-2.4285	-2.31842	2.28183e-23	1.26484e-20	Hypo‐Down
MergePeak_4318	TraesCS2B03G0560500	-2.42571	-1.88709	0.000156574	0.00339783	Hypo‐Down
MergePeak_5810	TraesCS2D03G0738900	-2.42039	-2.25476	0.000140955	0.0031012	Hypo‐Down
MergePeak_13454	TraesCS5A03G0960400	-2.40075	-1.38986	6.52276e-08	3.53952e-06	Hypo‐Down
MergePeak_13884	TraesCS5B03G0211600	-2.39956	-1.51293	2.79166e-08	1.63924e-06	Hypo‐Down
MergePeak_14503	TraesCS5B03G0884400	-2.39882	-2.61134	4.11549e-31	5.0534e-28	Hypo‐Down
MergePeak_7055	TraesCS3A03G0871600	-2.39878	-1.47254	3.21948e-11	3.5651e-09	Hypo‐Down
MergePeak_3450	TraesCS2A03G0741400	-2.39794	-1.48841	7.85598e-14	1.43785e-11	Hypo‐Down
MergePeak_3192	TraesCS2A03G0430100	-2.39381	-1.92568	3.93279e-19	1.44506e-16	Hypo‐Down
MergePeak_15026	TraesCS5D03G0148700	-2.38999	-1.63401	5.50688e-13	8.49267e-11	Hypo‐Down
MergePeak_10176	TraesCS4A03G0603000	-2.38067	-2.22218	4.3728e-19	1.58869e-16	Hypo‐Down
MergePeak_12520	TraesCS4D03G0764100	-2.37433	-1.94601	9.17299e-32	1.20246e-28	Hypo‐Down
MergePeak_7603	TraesCS3B03G0463400	-2.37345	-1.57764	1.34927e-12	1.94557e-10	Hypo‐Down
MergePeak_7148	TraesCS3A03G0952700	-2.37326	-1.35689	5.68957e-10	4.79922e-08	Hypo‐Down
MergePeak_2534	TraesCS1D03G0729600	-2.36795	-3.47273	1.86386e-42	6.21184e-39	Hypo‐Down
MergePeak_842	TraesCS1A03G0986900	-2.36023	-1.55967	4.25475e-17	1.24315e-14	Hypo‐Down
MergePeak_842	TraesCS1A03G0987000LC	-2.36023	-1.47495	2.31471e-09	1.71271e-07	Hypo‐Down
MergePeak_10873	TraesCS4B03G0203200	-2.35114	-2.22978	5.70468e-06	0.000189318	Hypo‐Down
MergePeak_12249	TraesCS4D03G0514100	-2.34508	-1.04031	5.72246e-07	2.45404e-05	Hypo‐Down
MergePeak_14633	TraesCS5B03G1010400	-2.32979	-1.99372	4.48745e-12	5.79627e-10	Hypo‐Down
MergePeak_2719	TraesCS1D03G0931200	-2.322	-1.52474	4.81773e-12	6.1867e-10	Hypo‐Down
MergePeak_1872	TraesCS1D03G0000100	-2.32155	-1.12782	2.96014e-08	1.73188e-06	Hypo‐Down
MergePeak_18713	TraesCS7A03G0483300	-2.31159	-1.37563	2.40622e-09	1.77501e-07	Hypo‐Down
MergePeak_6758	TraesCS3A03G0593600	-2.3115	-1.77514	0.000532044	0.00971032	Hypo‐Down
MergePeak_13671	TraesCS5A03G1181100	-2.31091	-2.15636	9.29017e-24	5.27364e-21	Hypo‐Down
MergePeak_12940	TraesCS5A03G0448500	-2.30084	-2.06182	0.000640909	0.0113741	Hypo‐Down
MergePeak_16213	TraesCS6A03G0056000	-2.29984	-1.38538	4.42079e-09	3.05655e-07	Hypo‐Down
MergePeak_4294	TraesCS2B03G0543000	-2.28786	-2.19015	0.00187551	0.027578	Hypo‐Down
MergePeak_15018	TraesCS5D03G0137500	-2.28285	-1.35979	1.39715e-05	0.000413955	Hypo‐Down
MergePeak_9186	TraesCS3D03G0734800	-2.27784	-2.41074	3.64221e-13	5.86891e-11	Hypo‐Down
MergePeak_15979	TraesCS5D03G1028600	-2.26857	-1.8939	1.48587e-12	2.12589e-10	Hypo‐Down
MergePeak_7886	TraesCS3B03G0745800	-2.26675	-2.13627	9.46854e-05	0.00220949	Hypo‐Down
MergePeak_17903	TraesCS6D03G0480700	-2.26603	-1.20219	1.62836e-08	1.00227e-06	Hypo‐Down
MergePeak_1824	TraesCS1B03G1209500	-2.26169	-1.84102	2.08741e-14	4.24502e-12	Hypo‐Down
MergePeak_19470	TraesCS7B03G0050900	-2.26094	-2.2445	2.07604e-21	9.31013e-19	Hypo‐Down
MergePeak_17754	TraesCS6D03G0340100	-2.26014	-2.04708	7.52991e-19	2.67557e-16	Hypo‐Down
MergePeak_19011	TraesCS7A03G0773000	-2.25992	-1.29971	1.11046e-08	7.07282e-07	Hypo‐Down
MergePeak_14348	TraesCS5B03G0665700	-2.25074	-1.62756	0.00229006	0.0324671	Hypo‐Down
MergePeak_20821	TraesCS7D03G0623200	-2.2493	-1.69823	3.17781e-15	7.35704e-13	Hypo‐Down
MergePeak_10038	TraesCS4A03G0451700	-2.24893	-1.65706	4.44371e-12	5.75511e-10	Hypo‐Down
MergePeak_7932	TraesCS3B03G0786000	-2.24546	-1.99269	4.475e-12	5.7879e-10	Hypo‐Down
MergePeak_6314	TraesCS3A03G0107800	-2.23952	-1.51621	2.30902e-13	3.85514e-11	Hypo‐Down
MergePeak_5310	TraesCS2D03G0286500	-2.23517	-1.68315	0.000562849	0.0101636	Hypo‐Down
MergePeak_5310	TraesCS2D03G0286600LC	-2.23517	-3.04851	1.23568e-13	2.16756e-11	Hypo‐Down
MergePeak_14843	TraesCS5B03G1265100	-2.22555	-1.00499	5.70579e-05	0.00142724	Hypo‐Down
MergePeak_4619	TraesCS2B03G0856200	-2.2206	-1.10779	9.2256e-06	0.000286741	Hypo‐Down
MergePeak_4020	TraesCS2B03G0179100	-2.21676	-2.27356	0.00114394	0.0183903	Hypo‐Down
MergePeak_18890	TraesCS7A03G0647100	-2.21095	-1.16342	1.06731e-08	6.81586e-07	Hypo‐Down
MergePeak_13475	TraesCS5A03G0981000	-2.20464	-1.9787	4.33042e-05	0.00112288	Hypo‐Down
MergePeak_1871	TraesCS1D03G0000100	-2.18835	-1.12782	2.96014e-08	1.73188e-06	Hypo‐Down
MergePeak_3728	TraesCS2A03G1018500	-2.18266	-1.97291	4.70006e-13	7.37742e-11	Hypo‐Down
MergePeak_21380	TraesCS7D03G1294100	-2.17293	-1.35281	2.5422e-09	1.86256e-07	Hypo‐Down
MergePeak_2749	TraesCS1D03G0954900	-2.17205	-3.1018	9.58627e-34	1.54984e-30	Hypo‐Down
MergePeak_3014	TraesCS2A03G0274100	-2.16996	-1.92453	0.00116267	0.01865	Hypo‐Down
MergePeak_14126	TraesCS5B03G0442000	-2.16534	-1.85001	0.000589429	0.0105785	Hypo‐Down
MergePeak_1100	TraesCS1B03G0355400	-2.16439	-1.13294	4.23935e-08	2.41193e-06	Hypo‐Down
MergePeak_13566	TraesCS5A03G1079500	-2.16296	-1.76584	3.61224e-14	7.00803e-12	Hypo‐Down
MergePeak_6990	TraesCS3A03G0795500	-2.15913	-1.80254	9.79182e-12	1.20633e-09	Hypo‐Down
MergePeak_13696	TraesCS5A03G1207600	-2.1582	-1.58534	6.22849e-08	3.39681e-06	Hypo‐Down
MergePeak_15541	TraesCS5D03G0608700	-2.15182	-2.05281	1.12219e-15	2.79121e-13	Hypo‐Down
MergePeak_20004	TraesCS7B03G0683300	-2.15012	-1.02638	3.03493e-08	1.76923e-06	Hypo‐Down
MergePeak_10202	TraesCS4A03G0624000	-2.14895	-1.40348	2.97314e-08	1.73739e-06	Hypo‐Down
MergePeak_312	TraesCS1A03G0449900	-2.14112	-1.47357	4.73301e-11	5.0232e-09	Hypo‐Down
MergePeak_5255	TraesCS2D03G0236100	-2.13289	-1.64098	1.02599e-11	1.25981e-09	Hypo‐Down
MergePeak_19397	TraesCS7A03G1286100	-2.12669	-1.78259	1.28882e-15	3.1893e-13	Hypo‐Down
MergePeak_16017	TraesCS5D03G1060600	-2.12555	-1.45262	3.3275e-10	2.93971e-08	Hypo‐Down
MergePeak_8690	TraesCS3D03G0343600	-2.12294	-1.08472	1.23283e-06	4.86333e-05	Hypo‐Down
MergePeak_15491	TraesCS5D03G0552200	-2.11833	-1.67177	7.28853e-14	1.33652e-11	Hypo‐Down
MergePeak_18757	TraesCS7A03G0528000	-2.11354	-1.83664	0.000211249	0.00440783	Hypo‐Down
MergePeak_16546	TraesCS6A03G0582900	-2.1133	-1.38301	2.50306e-07	1.16678e-05	Hypo‐Down
MergePeak_5197	TraesCS2D03G0140800	-2.11216	-1.45512	2.25827e-08	1.35223e-06	Hypo‐Down
MergePeak_14455	TraesCS5B03G0777900	-2.11068	-1.91986	3.93211e-13	6.29275e-11	Hypo‐Down
MergePeak_4024	TraesCS2B03G0179600	-2.11043	-2.52608	0.000228606	0.00471824	Hypo‐Down
MergePeak_11956	TraesCS4D03G0238600	-2.10882	-1.62783	4.52e-08	2.55214e-06	Hypo‐Down
MergePeak_15685	TraesCS5D03G0741600	-2.10602	-1.73755	3.36079e-17	1.01245e-14	Hypo‐Down
MergePeak_18881	TraesCS7A03G0642100	-2.09557	-1.90249	4.34377e-14	8.29456e-12	Hypo‐Down
MergePeak_16247	TraesCS6A03G0119000LC	-2.08813	-1.7321	5.26251e-08	2.92541e-06	Hypo‐Down
MergePeak_12511	TraesCS4D03G0753800LC	-2.08459	-1.19576	6.08448e-06	0.000199533	Hypo‐Down
MergePeak_10179	TraesCS4A03G0603600	-2.08099	-1.58982	2.65259e-09	1.93905e-07	Hypo‐Down
MergePeak_10291	TraesCS4A03G0705000	-2.07124	-1.93237	5.8462e-11	6.10447e-09	Hypo‐Down
MergePeak_1695	TraesCS1B03G1003000	-2.06666	-1.50594	1.18727e-10	1.15749e-08	Hypo‐Down
MergePeak_2550	TraesCS1D03G0745400	-2.06635	-2.42734	1.22661e-05	0.000368835	Hypo‐Down
MergePeak_1289	TraesCS1B03G0564700	-2.06192	-1.88257	2.83006e-11	3.16275e-09	Hypo‐Down
MergePeak_17280	TraesCS6B03G0920800	-2.05883	-2.01919	0.000142241	0.00312524	Hypo‐Down
MergePeak_4021	TraesCS2B03G0179200	-2.05736	-1.95819	0.0027104	0.0373307	Hypo‐Down
MergePeak_11376	TraesCS4B03G0700900	-2.05688	-1.11018	8.12439e-07	3.35218e-05	Hypo‐Down
MergePeak_13915	TraesCS5B03G0254500	-2.04518	-1.00131	3.72513e-07	1.66683e-05	Hypo‐Down
MergePeak_13915	TraesCS5B03G0254600LC	-2.04518	-1.79142	8.14744e-05	0.00194716	Hypo‐Down
MergePeak_3986	TraesCS2B03G0106500	-2.04486	-1.56901	1.70033e-10	1.61073e-08	Hypo‐Down
MergePeak_13286	TraesCS5A03G0783800	-2.03714	-1.71858	8.69713e-15	1.88316e-12	Hypo‐Down
MergePeak_1779	TraesCS1B03G1132300	-2.03159	-1.65699	2.94245e-12	3.93696e-10	Hypo‐Down
MergePeak_1611	TraesCS1B03G0892400	-2.03141	-2.46603	1.64628e-21	7.49746e-19	Hypo‐Down
MergePeak_19066	TraesCS7A03G0824800	-2.02778	-1.01699	8.71617e-07	3.56636e-05	Hypo‐Down
MergePeak_15988	TraesCS5D03G1033100	-2.02776	-1.72603	8.81173e-14	1.59771e-11	Hypo‐Down
MergePeak_2750	TraesCS1D03G0954900	-2.02092	-3.1018	9.58627e-34	1.54984e-30	Hypo‐Down
MergePeak_1221	TraesCS1B03G0495300	-2.01622	-1.15883	3.32611e-06	0.000118056	Hypo‐Down
MergePeak_1896	TraesCS1D03G0058000	-2.01593	-1.61218	1.28756e-10	1.25024e-08	Hypo‐Down
MergePeak_2774	TraesCS1D03G0985100	-2.009	-1.94578	1.83388e-16	5.00465e-14	Hypo‐Down
MergePeak_816	TraesCS1A03G0955000	-2.00296	-1.57446	1.56577e-11	1.84552e-09	Hypo‐Down
MergePeak_9399	TraesCS3D03G0943500	-2.00233	-2.03378	7.22318e-14	1.32956e-11	Hypo‐Down
MergePeak_17583	TraesCS6D03G0083900	-2.00202	-1.61142	1.42805e-17	4.41166e-15	Hypo‐Down
MergePeak_2964	TraesCS2A03G0229800	-2.00119	-1.75572	0.000440246	0.00822687	Hypo‐Down
MergePeak_21274	TraesCS7D03G1109500	-1.98733	-1.46008	1.98288e-11	2.3008e-09	Hypo‐Down
MergePeak_13752	TraesCS5A03G1286500	-1.98709	-1.31518	1.15992e-08	7.34922e-07	Hypo‐Down
MergePeak_332	TraesCS1A03G0465100	-1.96421	-2.10696	0.00330219	0.0438622	Hypo‐Down
MergePeak_11537	TraesCS4B03G0861900	-1.96416	-2.6079	9.5533e-21	3.96029e-18	Hypo‐Down
MergePeak_4022	TraesCS2B03G0179300	-1.95683	-2.48692	0.00204161	0.0295589	Hypo‐Down
MergePeak_12708	TraesCS5A03G0197200	-1.95679	-1.48595	1.59837e-07	7.81886e-06	Hypo‐Down
MergePeak_9154	TraesCS3D03G0704100	-1.95189	-1.52751	1.21728e-11	1.4705e-09	Hypo‐Down
MergePeak_14380	TraesCS5B03G0704500	-1.94551	-1.71623	0.000877101	0.0147456	Hypo‐Down
MergePeak_4360	TraesCS2B03G0600500	-1.94394	-1.48179	3.32089e-11	3.66067e-09	Hypo‐Down
MergePeak_20672	TraesCS7D03G0467800	-1.94369	-1.98485	0.000188404	0.00399038	Hypo‐Down
MergePeak_2882	TraesCS2A03G0101700	-1.9421	-1.22828	2.65325e-07	1.23029e-05	Hypo‐Down
MergePeak_14864	TraesCS5B03G1297500	-1.93448	-1.83028	3.33983e-18	1.10196e-15	Hypo‐Down
MergePeak_19536	TraesCS7B03G0176400	-1.92953	-1.5868	2.77851e-12	3.73305e-10	Hypo‐Down
MergePeak_2422	TraesCS1D03G0614900	-1.92833	-2.04881	1.61479e-18	5.51554e-16	Hypo‐Down
MergePeak_5938	TraesCS2D03G0877800	-1.92175	-1.09332	4.56711e-07	2.00284e-05	Hypo‐Down
MergePeak_14301	TraesCS5B03G0599300	-1.91976	-1.69469	1.68575e-13	2.88402e-11	Hypo‐Down
MergePeak_16657	TraesCS6B03G0025300	-1.91818	-1.22765	1.56014e-07	7.65502e-06	Hypo‐Down
MergePeak_19806	TraesCS7B03G0472800	-1.91403	-1.30412	2.17157e-08	1.30596e-06	Hypo‐Down
MergePeak_14750	TraesCS5B03G1166800	-1.90647	-1.15422	2.63618e-08	1.55642e-06	Hypo‐Down
MergePeak_14302	TraesCS5B03G0599300	-1.90247	-1.69469	1.68575e-13	2.88402e-11	Hypo‐Down
MergePeak_8570	TraesCS3D03G0225400LC	-1.90235	-1.01036	1.89815e-08	1.15296e-06	Hypo‐Down
MergePeak_8570	TraesCS3D03G0225500	-1.90235	-1.37549	9.22072e-14	1.66564e-11	Hypo‐Down
MergePeak_135	TraesCS1A03G0233400	-1.89924	-1.15427	2.83981e-09	2.06038e-07	Hypo‐Down
MergePeak_14738	TraesCS5B03G1143000	-1.89813	-1.60815	8.73411e-13	1.30145e-10	Hypo‐Down
MergePeak_21390	TraesCS7D03G1305300	-1.88914	-1.19972	1.33308e-07	6.65197e-06	Hypo‐Down
MergePeak_4303	TraesCS2B03G0552400	-1.8866	-1.25484	2.34453e-10	2.15572e-08	Hypo‐Down
MergePeak_12230	TraesCS4D03G0496100	-1.88383	-2.10587	9.87645e-08	5.11508e-06	Hypo‐Down
MergePeak_11890	TraesCS4D03G0168000	-1.88378	-2.19447	2.05263e-20	8.19397e-18	Hypo‐Down
MergePeak_4779	TraesCS2B03G1030900	-1.88178	-1.07413	3.32966e-08	1.926e-06	Hypo‐Down
MergePeak_15652	TraesCS5D03G0713000	-1.88162	-1.27843	0.00136164	0.0212355	Hypo‐Down
MergePeak_1803	TraesCS1B03G1169100	-1.88011	-1.30198	9.35915e-15	2.01464e-12	Hypo‐Down
MergePeak_15566	TraesCS5D03G0635900	-1.8792	-1.82862	0.00287593	0.0391767	Hypo‐Down
MergePeak_17995	TraesCS6D03G0549200	-1.87913	-1.50788	8.26031e-13	1.23464e-10	Hypo‐Down
MergePeak_18997	TraesCS7A03G0762800	-1.86463	-1.04613	3.43139e-05	0.000912692	Hypo‐Down
MergePeak_20500	TraesCS7D03G0237300	-1.86229	-1.45877	1.6777e-09	1.27842e-07	Hypo‐Down
MergePeak_3173	TraesCS2A03G0412600	-1.85329	-2.26252	6.09526e-19	2.19801e-16	Hypo‐Down
MergePeak_12543	TraesCS4D03G0788700	-1.841	-1.17104	2.69899e-09	1.97e-07	Hypo‐Down
MergePeak_13621	TraesCS5A03G1134200	-1.83926	-1.46708	1.7772e-10	1.67537e-08	Hypo‐Down
MergePeak_3449	TraesCS2A03G0738500	-1.83905	-1.74371	2.91102e-13	4.77801e-11	Hypo‐Down
MergePeak_1780	TraesCS1B03G1132300	-1.83436	-1.65699	2.94245e-12	3.93696e-10	Hypo‐Down
MergePeak_4873	TraesCS2B03G1160400	-1.83042	-1.95475	0.000159702	0.0034549	Hypo‐Down
MergePeak_5632	TraesCS2D03G0584300	-1.82093	-1.71751	9.66975e-13	1.42989e-10	Hypo‐Down
MergePeak_12747	TraesCS5A03G0237400	-1.81192	-1.09708	2.46788e-06	9.02902e-05	Hypo‐Down
MergePeak_18052	TraesCS6D03G0599500	-1.8117	-1.69293	0.00117762	0.0188349	Hypo‐Down
MergePeak_12500	TraesCS4D03G0745200	-1.80862	-1.66309	0.00256615	0.0356936	Hypo‐Down
MergePeak_15889	TraesCS5D03G0935700	-1.80839	-1.53056	9.10799e-09	5.93306e-07	Hypo‐Down
MergePeak_8026	TraesCS3B03G0876000	-1.80821	-1.46621	7.88033e-12	9.85082e-10	Hypo‐Down
MergePeak_17212	TraesCS6B03G0849400	-1.80536	-1.52478	0.0020051	0.0291172	Hypo‐Down
MergePeak_8470	TraesCS3D03G0095000	-1.80485	-1.23397	5.24804e-10	4.4578e-08	Hypo‐Down
MergePeak_15646	TraesCS5D03G0705600	-1.79576	-1.44597	4.62753e-08	2.60679e-06	Hypo‐Down
MergePeak_15008	TraesCS5D03G0111300	-1.79282	-1.43054	3.48875e-10	3.07378e-08	Hypo‐Down
MergePeak_10991	TraesCS4B03G0327500	-1.79058	-1.27897	2.01016e-09	1.50943e-07	Hypo‐Down
MergePeak_4304	TraesCS2B03G0552400	-1.789	-1.25484	2.34453e-10	2.15572e-08	Hypo‐Down
MergePeak_4305	TraesCS2B03G0552400	-1.789	-1.25484	2.34453e-10	2.15572e-08	Hypo‐Down
MergePeak_14784	TraesCS5B03G1204900	-1.78566	-1.52374	3.89171e-11	4.20391e-09	Hypo‐Down
MergePeak_4582	TraesCS2B03G0815100	-1.78072	-1.70111	0.00080497	0.0137498	Hypo‐Down
MergePeak_20994	TraesCS7D03G0779600	-1.77567	-1.41761	1.73029e-08	1.05896e-06	Hypo‐Down
MergePeak_12715	TraesCS5A03G0207600	-1.7718	-1.91598	2.8231e-11	3.15861e-09	Hypo‐Down
MergePeak_4322	TraesCS2B03G0563500	-1.76737	-1.14373	1.59754e-09	1.2231e-07	Hypo‐Down
MergePeak_6988	TraesCS3A03G0795100	-1.7631	-1.6881	5.03221e-11	5.31748e-09	Hypo‐Down
MergePeak_15453	TraesCS5D03G0512700	-1.76036	-1.65721	1.4809e-09	1.14101e-07	Hypo‐Down
MergePeak_14479	TraesCS5B03G0815100	-1.75119	-1.87144	1.08068e-17	3.38162e-15	Hypo‐Down
MergePeak_6226	TraesCS2D03G1265000	-1.74279	-1.18278	6.72812e-15	1.48331e-12	Hypo‐Down
MergePeak_10200	TraesCS4A03G0621300	-1.74272	-1.28362	5.64379e-08	3.11771e-06	Hypo‐Down
MergePeak_16054	TraesCS5D03G1091200	-1.74087	-1.0249	1.59555e-08	9.84573e-07	Hypo‐Down
MergePeak_6782	TraesCS3A03G0618600LC	-1.73293	-1.6753	1.52344e-10	1.45452e-08	Hypo‐Down
MergePeak_1902	TraesCS1D03G0074200	-1.73276	-1.0687	2.21792e-05	0.000622712	Hypo‐Down
MergePeak_10037	TraesCS4A03G0451700	-1.73222	-1.65706	4.44371e-12	5.75511e-10	Hypo‐Down
MergePeak_2522	TraesCS1D03G0719400	-1.73014	-1.24056	1.5422e-06	5.93885e-05	Hypo‐Down
MergePeak_15258	TraesCS5D03G0365800	-1.72587	-1.47582	2.51557e-07	1.17205e-05	Hypo‐Down
MergePeak_19447	TraesCS7B03G0015200	-1.7243	-1.47674	6.11611e-10	5.13668e-08	Hypo‐Down
MergePeak_3340	TraesCS2A03G0608500	-1.72093	-1.56692	4.00329e-11	4.31964e-09	Hypo‐Down
MergePeak_10343	TraesCS4A03G0733900	-1.72046	-1.10575	1.6098e-05	0.000469786	Hypo‐Down
MergePeak_1805	TraesCS1B03G1170500	-1.72031	-2.86052	1.60171e-29	1.68882e-26	Hypo‐Down
MergePeak_17305	TraesCS6B03G0942900LC	-1.71975	-1.66791	3.14007e-13	5.11931e-11	Hypo‐Down
MergePeak_6410	TraesCS3A03G0234800	-1.71465	-1.25797	2.57338e-15	6.04913e-13	Hypo‐Down
MergePeak_18338	TraesCS6D03G0854400	-1.71148	-1.68528	1.26445e-11	1.52558e-09	Hypo‐Down
MergePeak_5184	TraesCS2D03G0128800	-1.70407	-2.12724	0.00160767	0.0243127	Hypo‐Down
MergePeak_20939	TraesCS7D03G0732500	-1.70287	-1.55035	1.56343e-08	9.67828e-07	Hypo‐Down
MergePeak_16340	TraesCS6A03G0252200	-1.70263	-1.11641	6.8533e-05	0.00167878	Hypo‐Down
MergePeak_6822	TraesCS3A03G0656700	-1.7005	-2.33051	6.79591e-19	2.42364e-16	Hypo‐Down
MergePeak_13589	TraesCS5A03G1104100	-1.69783	-1.61693	1.5251e-10	1.45468e-08	Hypo‐Down
MergePeak_13830	TraesCS5B03G0126000	-1.69735	-1.23382	7.33258e-05	0.00177689	Hypo‐Down
MergePeak_11591	TraesCS4B03G0941400	-1.69632	-1.03947	6.3925e-10	5.34567e-08	Hypo‐Down
MergePeak_3275	TraesCS2A03G0529400	-1.69498	-1.38403	8.22189e-11	8.29061e-09	Hypo‐Down
MergePeak_12937	TraesCS5A03G0447800	-1.69297	-1.69339	0.00084138	0.0142467	Hypo‐Down
MergePeak_9790	TraesCS4A03G0195900	-1.69291	-1.31508	2.72196e-07	1.25914e-05	Hypo‐Down
MergePeak_4622	TraesCS2B03G0860100	-1.68987	-1.029	1.60014e-05	0.000467248	Hypo‐Down
MergePeak_7124	TraesCS3A03G0937600	-1.68934	-1.4657	4.3925e-07	1.93501e-05	Hypo‐Down
MergePeak_3144	TraesCS2A03G0388400	-1.68877	-1.39557	3.8855e-11	4.20189e-09	Hypo‐Down
MergePeak_19065	TraesCS7A03G0824800	-1.688	-1.01699	8.71617e-07	3.56636e-05	Hypo‐Down
MergePeak_5457	TraesCS2D03G0420300	-1.68304	-1.54938	1.71855e-12	2.42658e-10	Hypo‐Down
MergePeak_11112	TraesCS4B03G0481800	-1.68012	-1.58219	9.64279e-09	6.22526e-07	Hypo‐Down
MergePeak_15129	TraesCS5D03G0249000LC	-1.67623	-2.16739	3.41114e-06	0.0001205	Hypo‐Down
MergePeak_21425	TraesCSU03G0295800	-1.6749	-1.0108	1.74814e-07	8.44928e-06	Hypo‐Down
MergePeak_10136	TraesCS4A03G0550400	-1.66919	-1.73766	6.06087e-13	9.30266e-11	Hypo‐Down
MergePeak_15974	TraesCS5D03G1027900	-1.66682	-3.88879	3.27489e-74	6.35356e-70	Hypo‐Down
MergePeak_5864	TraesCS2D03G0794800	-1.65719	-1.47828	8.62681e-11	8.65393e-09	Hypo‐Down
MergePeak_18396	TraesCS6D03G0910500	-1.64402	-1.68226	0.000519187	0.00950608	Hypo‐Down
MergePeak_5747	TraesCS2D03G0681400	-1.6435	-1.5296	1.51991e-11	1.79582e-09	Hypo‐Down
MergePeak_16794	TraesCS6B03G0284600	-1.63542	-1.6319	0.000927541	0.015465	Hypo‐Down
MergePeak_16048	TraesCS5D03G1087400	-1.6342	-1.43131	2.4442e-11	2.77905e-09	Hypo‐Down
MergePeak_18457	TraesCS7A03G0096100	-1.63336	-1.40307	3.2799e-09	2.34116e-07	Hypo‐Down
MergePeak_1352	TraesCS1B03G0617500	-1.6321	-1.35827	3.08435e-10	2.7449e-08	Hypo‐Down
MergePeak_17486	TraesCS6B03G1190900	-1.62398	-1.31908	2.4055e-11	2.75169e-09	Hypo‐Down
MergePeak_8865	TraesCS3D03G0497500	-1.6222	-1.15286	1.95791e-09	1.47343e-07	Hypo‐Down
MergePeak_10432	TraesCS4A03G0846700	-1.61982	-1.89618	4.25234e-13	6.75114e-11	Hypo‐Down
MergePeak_10376	TraesCS4A03G0778600	-1.61937	-1.63436	4.01224e-12	5.24533e-10	Hypo‐Down
MergePeak_8471	TraesCS3D03G0095000	-1.61752	-1.23397	5.24804e-10	4.4578e-08	Hypo‐Down
MergePeak_147	TraesCS1A03G0255000	-1.61255	-1.32093	1.66257e-07	8.0921e-06	Hypo‐Down
MergePeak_15169	TraesCS5D03G0285300	-1.60991	-1.42215	3.24664e-10	2.87352e-08	Hypo‐Down
MergePeak_8266	TraesCS3B03G1139000	-1.60778	-1.57481	1.71682e-12	2.42658e-10	Hypo‐Down
MergePeak_1353	TraesCS1B03G0617500	-1.60501	-1.35827	3.08435e-10	2.7449e-08	Hypo‐Down
MergePeak_11566	TraesCS4B03G0902500	-1.60462	-1.16846	7.18063e-10	5.88302e-08	Hypo‐Down
MergePeak_6958	TraesCS3A03G0762500	-1.60237	-1.18699	4.77722e-09	3.27961e-07	Hypo‐Down
MergePeak_1269	TraesCS1B03G0549100	-1.60054	-1.3141	6.34849e-11	6.57936e-09	Hypo‐Down
MergePeak_11559	TraesCS4B03G0895100	-1.59314	-1.01772	1.30527e-07	6.52661e-06	Hypo‐Down
MergePeak_945	TraesCS1B03G0074200LC	-1.59032	-1.55228	9.78838e-12	1.20633e-09	Hypo‐Down
MergePeak_11212	TraesCS4B03G0568800	-1.58938	-1.05575	2.39081e-09	1.76632e-07	Hypo‐Down
MergePeak_5787	TraesCS2D03G0714700	-1.58544	-1.04324	6.48614e-06	0.000211064	Hypo‐Down
MergePeak_21313	TraesCS7D03G1182200	-1.58496	-1.76911	3.99434e-14	7.67262e-12	Hypo‐Down
MergePeak_10135	TraesCS4A03G0550400	-1.58472	-1.73766	6.06087e-13	9.30266e-11	Hypo‐Down
MergePeak_18891	TraesCS7A03G0647100	-1.57651	-1.16342	1.06731e-08	6.81586e-07	Hypo‐Down
MergePeak_6638	TraesCS3A03G0461600	-1.57314	-1.69124	2.67332e-09	1.95273e-07	Hypo‐Down
MergePeak_313	TraesCS1A03G0449900	-1.57212	-1.47357	4.73301e-11	5.0232e-09	Hypo‐Down
MergePeak_582	TraesCS1A03G0681800	-1.5679	-1.24347	3.86157e-09	2.71047e-07	Hypo‐Down
MergePeak_9326	TraesCS3D03G0869500	-1.56359	-1.13022	2.21418e-05	0.000622175	Hypo‐Down
MergePeak_18169	TraesCS6D03G0680700	-1.55643	-1.8123	0.000827738	0.0140644	Hypo‐Down
MergePeak_19222	TraesCS7A03G1005400	-1.54944	-2.21374	7.32435e-10	5.99065e-08	Hypo‐Down
MergePeak_6637	TraesCS3A03G0460600	-1.54616	-1.59311	4.68585e-11	4.98953e-09	Hypo‐Down
MergePeak_20953	TraesCS7D03G0742800	-1.54584	-1.35795	5.25907e-09	3.58756e-07	Hypo‐Down
MergePeak_19920	TraesCS7B03G0606700	-1.54335	-1.57875	1.30546e-10	1.26382e-08	Hypo‐Down
MergePeak_3567	TraesCS2A03G0852000	-1.53355	-1.42186	1.86203e-11	2.17096e-09	Hypo‐Down
MergePeak_3838	TraesCS2A03G1167400	-1.52828	-1.17318	4.43672e-08	2.51243e-06	Hypo‐Down
MergePeak_2897	TraesCS2A03G0131700	-1.5262	-1.99163	0.00254094	0.0354089	Hypo‐Down
MergePeak_17996	TraesCS6D03G0549200	-1.52533	-1.50788	8.26031e-13	1.23464e-10	Hypo‐Down
MergePeak_8713	TraesCS3D03G0363500	-1.51902	-1.61024	1.54448e-12	2.20002e-10	Hypo‐Down
MergePeak_13574	TraesCS5A03G1099300	-1.51024	-1.48702	2.88866e-10	2.59215e-08	Hypo‐Down
MergePeak_18548	TraesCS7A03G0257600	-1.50409	-1.4941	1.06165e-06	4.25905e-05	Hypo‐Down
MergePeak_16287	TraesCS6A03G0192300	-1.50392	-1.03675	0.000164509	0.00354464	Hypo‐Down
MergePeak_13450	TraesCS5A03G0957300	-1.49723	-2.07241	0.00068895	0.0120983	Hypo‐Down
MergePeak_18397	TraesCS6D03G0910500	-1.49249	-1.68226	0.000519187	0.00950608	Hypo‐Down
MergePeak_17318	TraesCS6B03G0954700	-1.49139	-1.11044	2.49258e-06	9.10013e-05	Hypo‐Down
MergePeak_9375	TraesCS3D03G0923400	-1.49091	-1.59951	0.00239772	0.0337476	Hypo‐Down
MergePeak_4583	TraesCS2B03G0817900	-1.48987	-1.61974	1.11069e-13	1.97557e-11	Hypo‐Down
MergePeak_19627	TraesCS7B03G0298500	-1.48855	-1.89593	0.000278603	0.00558726	Hypo‐Down
MergePeak_10703	TraesCS4B03G0061400	-1.4837	-1.38509	2.73381e-06	9.89885e-05	Hypo‐Down
MergePeak_18171	TraesCS6D03G0681300	-1.48296	-1.30169	5.8421e-07	2.49651e-05	Hypo‐Down
MergePeak_20355	TraesCS7D03G0000900	-1.479	-1.6483	0.00372202	0.0484239	Hypo‐Down
MergePeak_18157	TraesCS6D03G0672500	-1.47596	-1.51654	6.84463e-10	5.64908e-08	Hypo‐Down
MergePeak_2214	TraesCS1D03G0450600	-1.47589	-1.68329	5.36419e-12	6.83768e-10	Hypo‐Down
MergePeak_17535	TraesCS6B03G1278500	-1.47545	-1.74202	0.000438738	0.00820816	Hypo‐Down
MergePeak_12137	TraesCS4D03G0429100	-1.46708	-1.48797	4.28392e-09	2.97039e-07	Hypo‐Down
MergePeak_17177	TraesCS6B03G0816600	-1.46479	-2.02677	6.72402e-15	1.48331e-12	Hypo‐Down
MergePeak_16165	TraesCS5D03G1211900	-1.46478	-1.03339	5.24553e-10	4.4578e-08	Hypo‐Down
MergePeak_6697	TraesCS3A03G0541400	-1.46271	-1.4564	1.67514e-09	1.27748e-07	Hypo‐Down
MergePeak_11966	TraesCS4D03G0245600	-1.45578	-2.09069	0.000591744	0.0106162	Hypo‐Down
MergePeak_11565	TraesCS4B03G0902500	-1.45549	-1.16846	7.18063e-10	5.88302e-08	Hypo‐Down
MergePeak_11651	TraesCS4D03G0015400	-1.44951	-1.39247	7.63497e-10	6.19768e-08	Hypo‐Down
MergePeak_16700	TraesCS6B03G0141500	-1.44809	-1.44064	5.00945e-07	2.17324e-05	Hypo‐Down
MergePeak_11536	TraesCS4B03G0861800	-1.44588	-1.35062	1.31715e-17	4.09515e-15	Hypo‐Down
MergePeak_5750	TraesCS2D03G0683800	-1.43064	-1.68022	3.73785e-14	7.22284e-12	Hypo‐Down
MergePeak_13888	TraesCS5B03G0219600	-1.42304	-1.69916	1.14663e-05	0.000348129	Hypo‐Down
MergePeak_12554	TraesCS4D03G0794400	-1.42184	-1.19823	1.0638e-07	5.46574e-06	Hypo‐Down
MergePeak_5473	TraesCS2D03G0430200	-1.41786	-1.663	4.23481e-14	8.10244e-12	Hypo‐Down
MergePeak_8134	TraesCS3B03G0993700	-1.41483	-1.42	1.33799e-11	1.60235e-09	Hypo‐Down
MergePeak_4394	TraesCS2B03G0629700	-1.41468	-1.54014	2.1064e-12	2.91482e-10	Hypo‐Down
MergePeak_7929	TraesCS3B03G0784500	-1.41314	-1.00336	6.15574e-08	3.36397e-06	Hypo‐Down
MergePeak_18427	TraesCS7A03G0017400	-1.41137	-1.05555	9.35068e-07	3.79838e-05	Hypo‐Down
MergePeak_4694	TraesCS2B03G0944700	-1.40616	-1.40139	4.92377e-10	4.20035e-08	Hypo‐Down
MergePeak_17077	TraesCS6B03G0712700	-1.4042	-1.27	3.19023e-09	2.28387e-07	Hypo‐Down
MergePeak_11081	TraesCS4B03G0457400	-1.40258	-1.21708	2.16627e-11	2.49273e-09	Hypo‐Down
MergePeak_9782	TraesCS4A03G0191300	-1.39883	-1.26809	3.79177e-10	3.31665e-08	Hypo‐Down
MergePeak_11535	TraesCS4B03G0861700	-1.39362	-1.28378	3.61047e-16	9.59533e-14	Hypo‐Down
MergePeak_3345	TraesCS2A03G0613700LC	-1.39349	-1.0908	2.95968e-07	1.35489e-05	Hypo‐Down
MergePeak_3345	TraesCS2A03G0613800	-1.39349	-1.46343	2.68482e-11	3.02483e-09	Hypo‐Down
MergePeak_535	TraesCS1A03G0648400	-1.39292	-1.11075	4.65668e-07	2.03593e-05	Hypo‐Down
MergePeak_12049	TraesCS4D03G0327900	-1.39273	-1.57535	5.48658e-15	1.22631e-12	Hypo‐Down
MergePeak_6140	TraesCS2D03G1117600	-1.39081	-1.22994	1.00362e-08	6.44738e-07	Hypo‐Down
MergePeak_16448	TraesCS6A03G0387900	-1.38846	-1.82998	6.87753e-17	1.95073e-14	Hypo‐Down
MergePeak_6093	TraesCS2D03G1044700	-1.38249	-1.41506	2.85679e-11	3.18895e-09	Hypo‐Down
MergePeak_19428	TraesCS7A03G1366100	-1.38015	-1.31054	8.08792e-10	6.54892e-08	Hypo‐Down
MergePeak_4101	TraesCS2B03G0318200	-1.37859	-1.75241	1.7233e-12	2.42975e-10	Hypo‐Down
MergePeak_17356	TraesCS6B03G0988300	-1.3758	-1.61666	3.49037e-11	3.82576e-09	Hypo‐Down
MergePeak_9398	TraesCS3D03G0943000	-1.37366	-1.34055	4.23809e-11	4.55274e-09	Hypo‐Down
MergePeak_10859	TraesCS4B03G0188800	-1.37254	-1.07565	9.46102e-09	6.12872e-07	Hypo‐Down
MergePeak_6518	TraesCS3A03G0355300	-1.37179	-1.34624	8.04254e-11	8.12665e-09	Hypo‐Down
MergePeak_16110	TraesCS5D03G1134100	-1.36935	-1.17288	6.49696e-06	0.000211345	Hypo‐Down
MergePeak_14795	TraesCS5B03G1217400	-1.36922	-1.69694	5.39535e-06	0.000180472	Hypo‐Down
MergePeak_7131	TraesCS3A03G0942500	-1.3679	-1.0921	3.53928e-05	0.000938044	Hypo‐Down
MergePeak_17571	TraesCS6D03G0057700	-1.3674	-1.60078	0.00102035	0.0167504	Hypo‐Down
MergePeak_19879	TraesCS7B03G0560800	-1.3636	-1.45292	1.64955e-11	1.9372e-09	Hypo‐Down
MergePeak_8957	TraesCS3D03G0567000	-1.3618	-1.92764	7.51537e-13	1.13697e-10	Hypo‐Down
MergePeak_4453	TraesCS2B03G0698600	-1.36111	-1.41049	5.6443e-10	4.76934e-08	Hypo‐Down
MergePeak_18184	TraesCS6D03G0689300	-1.35954	-1.57566	0.000879739	0.0147734	Hypo‐Down
MergePeak_18204	TraesCS6D03G0702400	-1.35658	-1.43947	1.50047e-09	1.15426e-07	Hypo‐Down
MergePeak_20758	TraesCS7D03G0558500	-1.3506	-1.13723	0.000143324	0.00314547	Hypo‐Down
MergePeak_5480	TraesCS2D03G0435400	-1.34963	-1.22931	1.31851e-09	1.03062e-07	Hypo‐Down
MergePeak_17176	TraesCS6B03G0816600	-1.3495	-2.02677	6.72402e-15	1.48331e-12	Hypo‐Down
MergePeak_3346	TraesCS2A03G0613700LC	-1.34681	-1.0908	2.95968e-07	1.35489e-05	Hypo‐Down
MergePeak_3346	TraesCS2A03G0613800	-1.34681	-1.46343	2.68482e-11	3.02483e-09	Hypo‐Down
MergePeak_920	TraesCS1B03G0001600	-1.34363	-1.74679	5.7584e-08	3.17379e-06	Hypo‐Down
MergePeak_11926	TraesCS4D03G0208500	-1.32903	-1.2851	3.39821e-05	0.000905355	Hypo‐Down
MergePeak_19446	TraesCS7B03G0015200	-1.32873	-1.47674	6.11611e-10	5.13668e-08	Hypo‐Down
MergePeak_5497	TraesCS2D03G0451200	-1.32781	-1.08952	2.496e-08	1.4845e-06	Hypo‐Down
MergePeak_9024	TraesCS3D03G0615900	-1.32213	-1.39215	1.14336e-09	9.03918e-08	Hypo‐Down
MergePeak_18424	TraesCS7A03G0008800	-1.31998	-1.13397	2.50148e-07	1.1666e-05	Hypo‐Down
MergePeak_17062	TraesCS6B03G0684100	-1.31418	-1.00828	1.02339e-06	4.12265e-05	Hypo‐Down
MergePeak_5014	TraesCS2B03G1373600	-1.31385	-1.24545	1.24303e-09	9.77928e-08	Hypo‐Down
MergePeak_3318	TraesCS2A03G0588700	-1.3119	-1.29191	7.82407e-09	5.14553e-07	Hypo‐Down
MergePeak_7673	TraesCS3B03G0532100	-1.3116	-1.59711	3.67751e-11	3.99478e-09	Hypo‐Down
MergePeak_8056	TraesCS3B03G0916100	-1.31032	-1.46547	5.91519e-11	6.16323e-09	Hypo‐Down
MergePeak_19772	TraesCS7B03G0445000	-1.30695	-1.77864	0.00140261	0.021737	Hypo‐Down
MergePeak_5264	TraesCS2D03G0240900	-1.30477	-1.54174	2.44533e-11	2.77905e-09	Hypo‐Down
MergePeak_14652	TraesCS5B03G1028600	-1.301	-1.88468	2.74588e-14	5.46345e-12	Hypo‐Down
MergePeak_3837	TraesCS2A03G1167400	-1.29624	-1.17318	4.43672e-08	2.51243e-06	Hypo‐Down
MergePeak_13086	TraesCS5A03G0561800	-1.2946	-1.03682	1.07601e-05	0.000329163	Hypo‐Down
MergePeak_5013	TraesCS2B03G1373600	-1.29144	-1.24545	1.24303e-09	9.77928e-08	Hypo‐Down
MergePeak_16600	TraesCS6A03G0804600	-1.28769	-1.59117	0.00234404	0.033117	Hypo‐Down
MergePeak_1810	TraesCS1B03G1177500	-1.28758	-2.06441	7.85609e-13	1.18518e-10	Hypo‐Down
MergePeak_18869	TraesCS7A03G0626800	-1.28154	-1.07379	1.16923e-05	0.000353553	Hypo‐Down
MergePeak_11567	TraesCS4B03G0902500	-1.28039	-1.16846	7.18063e-10	5.88302e-08	Hypo‐Down
MergePeak_15384	TraesCS5D03G0451000	-1.27986	-1.71359	1.36317e-13	2.37828e-11	Hypo‐Down
MergePeak_15757	TraesCS5D03G0849500	-1.27631	-1.16265	5.5727e-10	4.71294e-08	Hypo‐Down
MergePeak_10106	TraesCS4A03G0519500	-1.27409	-1.72422	1.61893e-08	9.97094e-07	Hypo‐Down
MergePeak_18440	TraesCS7A03G0041900	-1.27346	-1.08295	4.84814e-09	3.31891e-07	Hypo‐Down
MergePeak_9258	TraesCS3D03G0797700	-1.27267	-1.34442	2.3138e-10	2.13151e-08	Hypo‐Down
MergePeak_326	TraesCS1A03G0461300	-1.2705	-1.24671	3.25732e-10	2.88034e-08	Hypo‐Down
MergePeak_5575	TraesCS2D03G0522900	-1.269	-1.27898	8.13547e-09	5.33225e-07	Hypo‐Down
MergePeak_15887	TraesCS5D03G0935400	-1.26808	-1.41607	3.56791e-10	3.14067e-08	Hypo‐Down
MergePeak_17333	TraesCS6B03G0966800	-1.26482	-1.62848	0.00126043	0.0199164	Hypo‐Down
MergePeak_8493	TraesCS3D03G0116400	-1.26198	-1.26412	7.74267e-09	5.09545e-07	Hypo‐Down
MergePeak_2898	TraesCS2A03G0131800	-1.25427	-2.1818	0.00268362	0.0370354	Hypo‐Down
MergePeak_2541	TraesCS1D03G0736800	-1.25121	-1.4397	4.94038e-08	2.75899e-06	Hypo‐Down
MergePeak_11136	TraesCS4B03G0504400	-1.25106	-1.44065	2.56231e-10	2.32947e-08	Hypo‐Down
MergePeak_16120	TraesCS5D03G1158300	-1.24758	-1.33448	4.5315e-10	3.90732e-08	Hypo‐Down
MergePeak_21170	TraesCS7D03G0960100	-1.24706	-1.36384	0.00107113	0.0174394	Hypo‐Down
MergePeak_12291	TraesCS4D03G0541500	-1.24309	-1.42369	6.02158e-10	5.06607e-08	Hypo‐Down
MergePeak_20828	TraesCS7D03G0626900	-1.2404	-1.44484	2.27256e-10	2.1015e-08	Hypo‐Down
MergePeak_17902	TraesCS6D03G0480200	-1.23997	-1.167	3.34629e-09	2.38329e-07	Hypo‐Down
MergePeak_7191	TraesCS3A03G0992200	-1.23509	-1.61155	5.50116e-10	4.66056e-08	Hypo‐Down
MergePeak_10108	TraesCS4A03G0521400	-1.23032	-2.28194	5.7285e-21	2.41603e-18	Hypo‐Down
MergePeak_10652	TraesCS4B03G0021200	-1.22913	-1.15787	2.74745e-08	1.61523e-06	Hypo‐Down
MergePeak_17301	TraesCS6B03G0939100	-1.22804	-1.96534	2.42415e-11	2.76975e-09	Hypo‐Down
MergePeak_13055	TraesCS5A03G0533400	-1.22541	-1.55347	7.94019e-12	9.91287e-10	Hypo‐Down
MergePeak_12008	TraesCS4D03G0267600LC	-1.22507	-1.09713	0.000294536	0.00585594	Hypo‐Down
MergePeak_12008	TraesCS4D03G0267700	-1.22507	-1.19387	3.35353e-09	2.38669e-07	Hypo‐Down
MergePeak_13695	TraesCS5A03G1207600	-1.21708	-1.58534	6.22849e-08	3.39681e-06	Hypo‐Down
MergePeak_13176	TraesCS5A03G0665300	-1.21694	-1.77374	0.00128029	0.0201646	Hypo‐Down
MergePeak_14456	TraesCS5B03G0777900	-1.21672	-1.91986	3.93211e-13	6.29275e-11	Hypo‐Down
MergePeak_14730	TraesCS5B03G1138200	-1.21642	-1.03653	1.25968e-07	6.32799e-06	Hypo‐Down
MergePeak_1581	TraesCS1B03G0856300	-1.21543	-1.173	8.07435e-06	0.000255129	Hypo‐Down
MergePeak_2410	TraesCS1D03G0606000LC	-1.21135	-1.24696	1.21098e-07	6.1214e-06	Hypo‐Down
MergePeak_2215	TraesCS1D03G0450600	-1.21115	-1.68329	5.36419e-12	6.83768e-10	Hypo‐Down
MergePeak_3114	TraesCS2A03G0358800	-1.2108	-1.11114	8.92223e-07	3.63958e-05	Hypo‐Down
MergePeak_3160	TraesCS2A03G0397000	-1.21069	-1.10959	3.32378e-08	1.92375e-06	Hypo‐Down
MergePeak_12798	TraesCS5A03G0296100	-1.20683	-1.1178	4.08878e-09	2.84117e-07	Hypo‐Down
MergePeak_20503	TraesCS7D03G0238300	-1.20633	-1.12286	2.39736e-05	0.000667298	Hypo‐Down
MergePeak_15427	TraesCS5D03G0494600	-1.20439	-1.36976	4.15649e-11	4.47499e-09	Hypo‐Down
MergePeak_13079	TraesCS5A03G0549100	-1.19962	-1.63465	4.62716e-10	3.98272e-08	Hypo‐Down
MergePeak_12123	TraesCS4D03G0418800	-1.19931	-1.77401	2.3744e-11	2.71932e-09	Hypo‐Down
MergePeak_20977	TraesCS7D03G0765200	-1.19751	-1.75443	0.0018233	0.0269574	Hypo‐Down
MergePeak_3451	TraesCS2A03G0741400	-1.19509	-1.48841	7.85598e-14	1.43785e-11	Hypo‐Down
MergePeak_20853	TraesCS7D03G0650200	-1.18757	-1.63076	1.6195e-13	2.78543e-11	Hypo‐Down
MergePeak_7345	TraesCS3B03G0005600	-1.1868	-1.53948	1.99381e-11	2.30521e-09	Hypo‐Down
MergePeak_10930	TraesCS4B03G0269400	-1.18656	-1.64341	6.57335e-08	3.56224e-06	Hypo‐Down
MergePeak_6141	TraesCS2D03G1117600	-1.18011	-1.22994	1.00362e-08	6.44738e-07	Hypo‐Down
MergePeak_14854	TraesCS5B03G1291400	-1.17912	-1.23	1.35157e-08	8.43682e-07	Hypo‐Down
MergePeak_4926	TraesCS2B03G1250400	-1.17354	-1.56678	6.64545e-07	2.80764e-05	Hypo‐Down
MergePeak_8739	TraesCS3D03G0393800	-1.17348	-1.15645	1.27927e-07	6.41313e-06	Hypo‐Down
MergePeak_3790	TraesCS2A03G1100700	-1.17168	-1.35874	1.33631e-10	1.28982e-08	Hypo‐Down
MergePeak_20294	TraesCS7B03G1134600	-1.16762	-1.6094	2.02547e-14	4.12771e-12	Hypo‐Down
MergePeak_21381	TraesCS7D03G1294100	-1.16627	-1.35281	2.5422e-09	1.86256e-07	Hypo‐Down
MergePeak_20384	TraesCS7D03G0036600	-1.16244	-1.12633	1.21519e-08	7.65938e-07	Hypo‐Down
MergePeak_11049	TraesCS4B03G0414800	-1.16002	-1.38985	2.4362e-12	3.32846e-10	Hypo‐Down
MergePeak_18136	TraesCS6D03G0655300	-1.15635	-1.37265	3.67536e-10	3.22355e-08	Hypo‐Down
MergePeak_16680	TraesCS6B03G0084200	-1.15236	-1.56465	1.77394e-10	1.67392e-08	Hypo‐Down
MergePeak_2906	TraesCS2A03G0140600	-1.15221	-1.89162	1.03835e-07	5.3422e-06	Hypo‐Down
MergePeak_17819	TraesCS6D03G0393400	-1.15202	-1.06	1.17229e-10	1.14519e-08	Hypo‐Down
MergePeak_20697	TraesCS7D03G0500900	-1.14414	-1.13583	7.97173e-11	8.07192e-09	Hypo‐Down
MergePeak_16962	TraesCS6B03G0515700	-1.14368	-1.08822	3.55712e-09	2.51352e-07	Hypo‐Down
MergePeak_7391	TraesCS3B03G0138600	-1.13505	-1.26521	8.95138e-11	8.94253e-09	Hypo‐Down
MergePeak_13669	TraesCS5A03G1177500	-1.13409	-1.32381	1.54139e-09	1.18198e-07	Hypo‐Down
MergePeak_15357	TraesCS5D03G0435100	-1.133	-1.93353	1.27471e-17	3.97593e-15	Hypo‐Down
MergePeak_9430	TraesCS3D03G0974200	-1.13183	-1.31609	0.00115555	0.0185492	Hypo‐Down
MergePeak_7881	TraesCS3B03G0733400	-1.13107	-1.02122	5.55195e-05	0.00139451	Hypo‐Down
MergePeak_6138	TraesCS2D03G1115800	-1.12998	-1.47269	1.76186e-10	1.66414e-08	Hypo‐Down
MergePeak_11617	TraesCS4B03G0986200	-1.12882	-1.10383	3.3493e-06	0.000118575	Hypo‐Down
MergePeak_8454	TraesCS3D03G0068800	-1.12802	-1.04548	1.07176e-06	4.29254e-05	Hypo‐Down
MergePeak_1724	TraesCS1B03G1034700	-1.12469	-1.32036	1.0723e-07	5.50356e-06	Hypo‐Down
MergePeak_20815	TraesCS7D03G0609600	-1.11905	-1.07392	1.47891e-05	0.000435783	Hypo‐Down
MergePeak_5576	TraesCS2D03G0522900	-1.11691	-1.27898	8.13547e-09	5.33225e-07	Hypo‐Down
MergePeak_9955	TraesCS4A03G0332200	-1.11304	-1.03975	1.49313e-10	1.4284e-08	Hypo‐Down
MergePeak_13358	TraesCS5A03G0887500	-1.10849	-1.37677	9.43299e-11	9.36579e-09	Hypo‐Down
MergePeak_8121	TraesCS3B03G0980700	-1.10755	-1.59156	0.000130905	0.00291178	Hypo‐Down
MergePeak_16126	TraesCS5D03G1161300	-1.10598	-1.39891	2.54798e-10	2.31861e-08	Hypo‐Down
MergePeak_14724	TraesCS5B03G1135100	-1.10575	-1.33799	2.76443e-12	3.71929e-10	Hypo‐Down
MergePeak_2040	TraesCS1D03G0266200	-1.10464	-1.02714	6.05573e-07	2.58098e-05	Hypo‐Down
MergePeak_9781	TraesCS4A03G0191300	-1.10042	-1.26809	3.79177e-10	3.31665e-08	Hypo‐Down
MergePeak_20002	TraesCS7B03G0683300	-1.0964	-1.02638	3.03493e-08	1.76923e-06	Hypo‐Down
MergePeak_18860	TraesCS7A03G0622400	-1.09449	-1.64498	3.62921e-07	1.63212e-05	Hypo‐Down
MergePeak_12799	TraesCS5A03G0296100	-1.09084	-1.1178	4.08878e-09	2.84117e-07	Hypo‐Down
MergePeak_1288	TraesCS1B03G0563600	-1.09042	-1.69351	2.92387e-15	6.81796e-13	Hypo‐Down
MergePeak_12999	TraesCS5A03G0487100	-1.07308	-1.41767	1.0918e-12	1.60226e-10	Hypo‐Down
MergePeak_9126	TraesCS3D03G0685400LC	-1.07287	-1.25937	1.73934e-05	0.000504215	Hypo‐Down
MergePeak_4704	TraesCS2B03G0950700	-1.07072	-1.68233	0.00265185	0.0366647	Hypo‐Down
MergePeak_14193	TraesCS5B03G0486200	-1.06005	-1.50148	2.59065e-12	3.50983e-10	Hypo‐Down
MergePeak_19427	TraesCS7A03G1366100	-1.05978	-1.31054	8.08792e-10	6.54892e-08	Hypo‐Down
MergePeak_14794	TraesCS5B03G1217400	-1.05851	-1.69694	5.39535e-06	0.000180472	Hypo‐Down
MergePeak_4448	TraesCS2B03G0695000	-1.0553	-1.43689	1.45286e-11	1.72501e-09	Hypo‐Down
MergePeak_12171	TraesCS4D03G0450400	-1.0533	-1.12324	9.78011e-09	6.30372e-07	Hypo‐Down
MergePeak_2878	TraesCS2A03G0086600	-1.05071	-1.08155	7.71316e-06	0.000245153	Hypo‐Down
MergePeak_18211	TraesCS6D03G0708900	-1.05049	-1.21483	1.18426e-11	1.43418e-09	Hypo‐Down
MergePeak_18087	TraesCS6D03G0619900	-1.04988	-1.01985	9.44554e-06	0.000292827	Hypo‐Down
MergePeak_11398	TraesCS4B03G0727200	-1.04812	-1.47598	2.48522e-09	1.82634e-07	Hypo‐Down
MergePeak_14535	TraesCS5B03G0934300	-1.04597	-1.28807	8.49271e-10	6.82138e-08	Hypo‐Down
MergePeak_2748	TraesCS1D03G0954200	-1.0428	-1.27987	1.59728e-13	2.76189e-11	Hypo‐Down
MergePeak_13628	TraesCS5A03G1138200	-1.04271	-1.07547	1.14706e-08	7.282e-07	Hypo‐Down
MergePeak_19793	TraesCS7B03G0460600	-1.04159	-1.61536	3.16745e-14	6.22961e-12	Hypo‐Down
MergePeak_9501	TraesCS3D03G1122900	-1.04118	-1.48417	1.32353e-08	8.28627e-07	Hypo‐Down
MergePeak_16659	TraesCS6B03G0033400	-1.04101	-1.01098	7.99011e-08	4.22613e-06	Hypo‐Down
MergePeak_13194	TraesCS5A03G0686500	-1.04094	-1.01651	8.43225e-09	5.50816e-07	Hypo‐Down
MergePeak_20383	TraesCS7D03G0036600	-1.0407	-1.12633	1.21519e-08	7.65938e-07	Hypo‐Down
MergePeak_17895	TraesCS6D03G0476300	-1.03448	-1.48803	2.62954e-08	1.55344e-06	Hypo‐Down
MergePeak_7633	TraesCS3B03G0498500	-1.02398	-1.26231	2.39733e-07	1.12181e-05	Hypo‐Down
MergePeak_11372	TraesCS4B03G0698000	-1.02282	-1.0757	5.53949e-08	3.06884e-06	Hypo‐Down
MergePeak_5636	TraesCS2D03G0588300	-1.01871	-1.2178	8.66352e-10	6.94743e-08	Hypo‐Down
MergePeak_6271	TraesCS3A03G0003000	-1.01537	-2.22403	1.31034e-11	1.57507e-09	Hypo‐Down
MergePeak_8992	TraesCS3D03G0595600	-1.01369	-1.00404	0.000401193	0.00760848	Hypo‐Down
MergePeak_16286	TraesCS6A03G0192300	-1.01046	-1.03675	0.000164509	0.00354464	Hypo‐Down
MergePeak_19950	TraesCS7B03G0643000	-1.01023	-1.02974	3.89977e-07	1.73712e-05	Hypo‐Down
MergePeak_14729	TraesCS5B03G1138200	-1.00967	-1.03653	1.25968e-07	6.32799e-06	Hypo‐Down
MergePeak_2493	TraesCS1D03G0681800	-1.00334	-1.00211	7.09733e-08	3.8058e-06	Hypo‐Down
peak ID: Peak names after merging m6A modified peaks in infected and CK samples; Gene ID: wheat gene name; IP_log2(FC): In MeRIP-seq (IP) analysis, the fold change (FC) of m6A modified peaks in infected samples relative to the CK is calculated and then subjected to log2 transformation; In_log2(FC): In RNA-seq (Input, In) analysis, the fold change (FC) of transcripts in infected samples relative t…
