# Supplementary material for: Transcriptome-Wide N6-Methyladenosine (m6A) Methylation Analyses in a Compatible Wheat–Puccinia striiformis f. sp. tritici Interaction
Source: Plants (Basel). 2024 Mar 29;13(7):982. doi: 10.3390/plants13070982 (PMC11013425; doi:10.3390/plants13070982)
Supplement: Supplementary file 1 [file plants-13-00982-s001.zip › Supplementary Tables S32-S33 m6A regulators.xlsx]

## Sheet: Table S32. wheat m6A regulators
Supplementary Table S32. Accession numbers, amino acid sequences and name codes of m6A writers, erasers and readers of Triticum aestivum
m6A regulators	Accession numbers	Amino acid sequences	Name codes
m6A writers of Triticum aestivum	TraesCS6D01G236200	METKADVAAAGGDDLSTMREQCRSMEEAISFRREAQLGLVGSLQHLVPDLVPSLDRSLRLIAAFNDRSFTPTPNPNAGDPQNPSLKPHHRRAVPDPTRSTRRKTSPGSSPASAAVGGAAPGGLDAVRTMVAVFLLELIPFAEIDAAVLARRLQAESSSASDAERAALADLATELGGSVPAAVALALRRIAEDSGGVQIEEAMIGGKQMMMVWAIDRSKLLKELPESATLLSPQPPPIPQATSSETDANTAIIPRPPPPHQQQQPDMWAHSMPPMFPRPRGMTMAGMQRMVPGLMPLQRPFMAPSPGPSPTQQNQRTEEEDLKDLEVLLSKKTYKEKQNTKTGEELLDLIHRPTAKETAVAAKFKTKGGSQLKEYCTNLTKEDCRRQSGSFVSCAKVHFR…	TaMTA-D
	TraesCS6A01G254900	MEAKADVAAGGGDDLSTMREQCRSMEEAISFRREAQLGLVGSLQHLVPDLVPSLDRSLRLIAAFNDRPFTPTPNPNAGDPQNPSLKPHHRRTVPDPARSTRRKTSPGSSPASAAVGGAAPGGLDAVRTMVAVFLLELIPFAEIDAAVLARRLQAESSSASDAERAALADLATELGGSVPAAVALALRRIAEDSGGVQIEEAMIGGKQMMMVWAIDRSKLLKELPESATLLSPQPPPIPQATSSETDANSAIIPRPPPPHQQQQPDMWAHSMPPMFPRPRGMTMPGMQRMMPGLMPLQRPFMAPSPGPSPTQQNQRTEEEDLKDLEVLLSKKTYKEKQNTKTGEELLDLIHRPTAKETAVAAKFKTKGGSQLKEYCTNLTKEDCRRQSGSFVSCAKVHFR…	TaMTA-A
	TraesCS4D01G261800	MDASDELRSLEATGIYRLAGSRAAFVDPVRLLGESYRRFRLVPSAYYSRSFGPSRQGGEAQAEGTAPSPDRKKRKRKRQTKARELNAVERIAEARHQEARPLLISAHNSLLDAKYLLEYLPGMIKGDECRPELETSSENNFVELGGSWRAPFYEMTICFQKPLGQDEAGTCDVQKRSSPLFNRVVRVEENGEAEGEFQGRLYVLPKGSCFMMTDFTHVRDLIPDNPNTGYNLIVIDPPWENGCVRQKEAYPTLPNRNLLYLPVQELAHPAGALVVLWITNREKLRRFVEEELLPSWGVKDPTEFYWLKVKSDGSLIGDLDLFHHRPYECLLLGYINVNREAESGSKFKVLQGSQVIMSVPGAHSRKPPLQKILSEYIPGPKPPRCIELFARELGSGWTS…	TaMTC-D
	TraesCS4A01G413300	MDGSKSNAEEDDYHVIGDLRSPKIPRRSPDGSKERDDRKGWDSSRSETSADRADTRDGGYSSDHNKHGREKEMIHGHADESGGIRKGVDSSSSRGGRSDEDINERRGSAMAENINEDGRPADQSHQKEEILGHTVEYGHESKGGVEKEETSPRVGNDGWESSGDRRNRDAPPSQIPDTPDRGRDSSWNVKTQEVEGSEQYSRSRQLRDPKEANVSEWRSTQERLDGTSFQGRAGYRQDSRGRSESFRGSSTYGNRYDRSDSIEIRPNSNFDFGREGSVSGRRSDVGAPGTTDDSSTNHPEADQSGGTSMVSPFTQQGPKGDRSSRGRGRPTGRDSQRIGVPVPLMPPPSFGALALPPGQMQHMGPNIPHSPGPPLLPGVFMPPFPGPMVWPGAGGVDVN…	TaMTB-A
	TraesCS4D01G311200	MDGSKSNAEEDDYHVIGDLRSPKIPRRSPDGSKDRDFDRRERDDRKGWDSSRSETSADRVDTRDGGYSSDHNKHGRETEMIHDHADESVGIRKGVDSSSSRGGRSDEDINERRGSAMAENINEDSRSVDQSHQKEEILGHTVEYGHESKGGVEKVETSPRVGNDGWESSGDRRNRDAPPSQIPDTPDRGKDSSWNVKTQEIEGSEQYSRSRQLRDPKEANVSEWRSTQERLDGSSFHGRAGYRQDSRGRSESFRGSSTYGNRYDRSDSIEIRPNSNFDFGREGSVSGRRSDVGAPGTTDDSSTNHPEADQSGGTSMVSPFTQQGPKGDRSSRGRGRPNGRDSQRIGVPVPLMPPPSFGALTLPPGQMQHMGPNIPHSPGPPLLPGVFMPPFPGPMVWPG…	TaMTB-D
	TraesCS6B01G270600	MEAKADVAADLSTMREQCRSMEEVISFRREAQLGLVGSLQHLVPDLVPSLDRSLRLIAAFNDRPFTPTPNPNAGDPQNPSLKSHHRRAIPDPARSTRRKTSPGSSPASAAVGGAAPGGLDAVRTMVAVFLLELIPFAEIDAAVLARRLQAESSSASDAERAALADLATELGGSVPAAVALALRRIAEDSGGVQIEEAMIGGKQMMMVWAIDRSKLLKELPESATLLSPQPPPLPQATETDTNSAIIPRPPPPHQQQQPDMWAHSMPPMFPRPRGMTMPGMQRMMPGLMPLQRPFMAPSSGPSPTQQNQRTEEEDLKDLEVLLSKKTYKEKQNTKTGEELLDLIHRPTAKETAVAAKFKTKGGSQLKEYCTNLTKEDCRRQSGSFVSCAKVHFRRIIAPH…	TaMTA-B
	TraesCS4B01G261500	MEPSDELRLLEATGIYRLAGSRAAFLDPVRLLGESYRRFRLVPSAYYSRSFGPSRQGGEAQAEGTAPSPDRKKRKRKRQPKPRELNAVERIAEARHQEARPLLISAHNSLLEAKDLLEFLPGMIRGDECRPNVETSSENNFVELGGSWRAPFYEMTICFQNPHGQDEAGTCGVQKRSSPLFNRIVSVEENDEAEGEFQSRLYILPKRSCFMMTDFTHVRDLIPDNPNIGYNLIVIDPPWENGCVRQKEAYPTLPNRNLLYLPVQELAHPAGALLVLWITNREKLRRFVEEELLPSWGVKDPTEFYWLKVKSDGSLIGDLDLFHHRPYECLLLGYINNRESESGLKFKVVQGSQVIMSVPGAHSRKPPLQKILSEYIPGPKPPRCIELFARELGSGWTSW…	TaMTC-B
	TraesCS4B01G314000	MDGSKSNAEEDDYHVIGDLRSPKIPRRSPDGSKDRDFDRREREDRKGWDSSRSETSADMADTRDGGYSSDHNKHGRETEMIHDHADESGGIRKGVDSSSSRGGRSDEDINERRGSAMAENINEDSRSVDQSHQKEEILGHTVEYGHESKGGVEKVETSPRVGNDGWESSGDRRNRDAPPSQIPDTPDRGRDSSWNVKTQEVEGSEQYSRSRQLRDPKEANVSEWRSTQERLDGTSFHGRAGYRQDSRGRSESFRGSSTYGNRYDRSDSIEIRPNSNFDFGREGSVSGRRSDVGAPGTTDDSSTNHPEADQSGGTSMVSPFTQQGPKGDRSSRGRGRPNGRDSQRIGVPVPLMPPPSFGALTLPPGQMQHMGPNIPHSPGPPLLPGVFMPPFPGPMVWPG…	TaMTB-B
	TraesCS4A01G040800	MDASDELRSLEATGIYRLAGSPAAFVDPVRLLGESYRRFRLVPSAYYSRSFGPSRQGGEGTAPSPDRKKRKRKRQPKPRELNAVERIAEARHQEARPLLIRAHNSLLETKDLLEFLPGMIKGDECLPNVETSSENNFVELGASWRAPFYEMTICFQKPLGQVKAGTCNVQKRSSPLFNRIVSVEENDEAEGEFQSRLYILPKGSCFMMTDFTHVRDLIPDNPNIGYNLIVIDPPWENGCVRQKEVYPTLPNRNLLYLPVQELAHPAGALLVLWITNREKLRRFVEEELLPSWGVKDPTEFYWLKVKSDGSLIGDLDLFHHRPYECLLLGYINNREAESGSKFKVLQGSQVIMSVPGAHSRKPPLQKILSEYIPGPKPPRCIELFARELGSGWTSWGNEP…	TaMTC-A
	TraesCS7D01G343800	MIQLLFTLLAAEAGMAVVLLFKTPLRRLAMLALDRLKRGRAPVMVRTVAATVLVVLASSLHSMAKIHGHAGAGELDAPAALSPTDQVLLARHLLEASLMGYILFLALVIDRLHSYIREMRGLKKNLEAVSKQNKTLEEAKPGRSDESKPHHNDIASLNEEIKKLKRQLKEKAEEAKDAEAKALAAQTQSEGLARKYDRLLEDNKHLHEQLQSGDIPLSRSDGKKNA	TaFIP37-1D
	TraesCS7D01G234600	MADPPSPRLDEDDTFGRDFNASPSRNAAPARSGEKRQFGDLDDDEDDVFASKKGKTKVEESAPGAATGMILSLRESLQTCKENLESNQVELEAAKSEIQKWHSAFQNIPAVPAGTNPEPVSVVTYLNNLKSSEESLKEQLEKAKKREAAFIVTFAKREQEIAELKSAVRDLKTQLRPPSMQTRRLLLDPAIHEEFTRLKNLAEEKEKKIKELQENVAAVNFTPSSKHGKMLMAKCRTLQEENEEIGAMASEGKIHELGMKIAVLKTQNNELRNQFDGLYKHMDGLTNDVERSNEMVSILQEELEAKDVELARLKEMLCQKEATEDDTVVEEREEAANDMNASSDPQPIKVES	TaFIP37-2D
	TraesCS7A01G234600	MADPPSPRLDEDDTFGRDFNASPSRNAAPARSGEKRQFGDLDDDEDDVFASKKGKTKVEESAPGAATGMILSLRESLQTCKENLESNQVELEAAKSEIQKWHSAFQNIPAVPAGTNPEPVSVVTYLNNLKSSEESLKEQLEKAKKREAAFIVTFAKREQEIAELKSAVRDLKTQLRPPSMQTRRLLLDPAIHEEFTRLKNLAEEKEKKIKELQENVAAVNFTPSSKHGKMLMAKCRTLQEENEEIGAMASEGKIHELGMKIAVLKTQNNELRNQFDGLYKHMDGLTNDVERSNEMVSILQEELEAKDVELARLKEMLSQKEATEDDAVVEEREEAANDMNASSDPQPIKAES	TaFIP37-2A
	TraesCS7B01G132800	MADPPSPRLDEDDTFGRDFNASPSRNAAPARSGTLREKRQFGDLDDDEDDVFASKKGKTKVEESAPGAATGMILSLRESLQTCKENLESNQVELEAAKSEIQKWHSAFQNIPAVPAGTNPEPVSVITYLSNLKSSEESLKEQLEKAKKREAAFIVTFAKREQEIAELKSAVRDLKTQLRPPSMQTRRLLLDPAIHEEFTRLKNLAEEKEKKIKELQENVAAVNFTPSSKHGKMLMAKCRTLQEENEEIGAMASEGKIHELGMKIAVLKTQNNELRNQFDGLYKHMDGLTNDVERSNEMVSILQEELEAKDVELARLKEMLSQKEATEDDAVVEEREEAANDMNASSDPQPIKAES	TaFIP37-1B
	TraesCS7D01G345400	MGRPEPVVLFAQTILHSQLDEYVDEVLFSEPVVITACEFLEQNAAPSTPNISLVGATSPPSFALEVFVHCDGESRFRRLCLPFLYSHSSSNVLEVEAIVTNHLVLRGTYRSLTLVIYGNTAEDLGQFNIELGLDHSLANVVSSPSEGKFEDLPPALRSSKFKFEESLSSIKPLSFQSTDLDLSLEVKKILYLALKMHQIPNVENLIPDLGSAVISAVSKYVTNSNCMPHSWNQDLADGFSKSNLDPQESNNVHTEASNELFEIWKNVHSVAATRFGDDGFAVGLEELPTTKTILELFNNSFPYYRNCSLLDLQCPSQNNWLVMSLSLVLLICSSKESCFYFVDAGGMEQIINLLCWNTPKSTATTLLLLGIVENATRHGVGCEAFLGWWPRSDRNSIPT…	TaVIR-D
	TraesCS7A01G338200	MGRPEPVVLFAQTILHSQLDEYVDEVLFSEPVVITACEFLEQNAAPSTPNISLVGATSPPSFALEVFVHCDGESRFRRLCLPFLYSHSSSNVLEVEAIVTNHLVLRGTYCSLTLVIYGNTAEDLGQFNIELGLDHSLANVVSSPSEGKFEDLPPALRSSKFKFEESLSSIKPLSFQSTDLDLSLEVKKILYLALKMHQIPNVENLIPDLGSAVISAVSKYVTNSNCMPHSWNQDLADGFSKSNLDPQESNNVHTEASNELFEIWKNVHSVAATRFGDDDVFAIELEELPTTKTIFELFNSSFPYYRNCSLLDLQCPSQNNWLVMSLSLVLLICSSKESCFYFVDAGGMEQIINLLCWKTPRSTATTLLLLGIVENATRHGVGCEAFLGWWPRSDRNSIP…	TaVIR-A
	TraesCS7B01G249400	MGRPEPVVLFAQTILHSQLDEYVDEVLFSEPVVITACEFLEQNAAPSTPNISLVGATSPPSFALEVFVHCDGESRFRRLCLPFLYSHSSSNVLEVEAIVTNHLVLRGTYRSLTLVIYGNTAEDLGQFNIELGLDHSLANVVSSPSEGKFEDLPPALRSSKFKFEESLSSIKPLSFQSTDLDLSLEVKRILYLALKMHQIPNVENLIPDLGSAVISAVSKYVTNSNCMSHSWNQDLADGFSKSNLDPQESNNVHTEASNELFEIWKNVHFVAATRFGDDDGFAIELEELPMTKTIFELFNNSFPYYRNCSLLDLQCPSQNNWLVMSLSLVLLICSSKESCFYFVDAGGMEQIINLLCWKTPKSTATTLLLLGIVENATRHGVGCEAFLGWWPRSDRNSIP…	TaVIR-B
	TraesCS1D01G161400	MLQIRLSKIGSSDSGAAASGAAAGASGGAPAKSAAAAAGGAPESVTVACPDHLVIADLAVAKSLGAVTNSAIAATRAIGRRSRRPLGERVHICSRCEFPIAIYGRLIPCEHAFCLACARSDSSCYLCDERIQKIQTVKMMEGIFICAAPMCLKSFLKKAEFMSHVPEAHANLLQTNTEKEERNEPDAPNISRASGGDAQRQSQMPEISTARAPPRRGVSPTSSSHMQEREDRSRYHQSREREHTPLRPPMLSKPPSFHGRHYPPGDTQSENNTPQGFDRPYSWAHDGTPGATPLRQEPDHGTQDKQQVMPNSPFMFSPMHPHQQNFMMHMNMNQPLIPNSSFSYPVQQDGNPQYFSAPFQMQLQDAGSDQGSASVPEGLQRPWGMGLMGNPSQGGGGMA…	TaHAKAI1-D
	TraesCS1A01G164400	MLQIRLSKIGSSDSGAAASGAAAGASGGAPAKSAAAAAGGAPESVTVACPDHLVIADLAVAKSLGAVTNSAIAATRAIGRRSRRPLGERVHICSRCEFPIAIYGRLIPCEHAFCLACARSDSSCYLCDERIQKIQTVKMMEGIFICAAPMCLKSFLKKAEFMSHVPEAHANLLQTNTEKEERNEPDAPNISRASGGDAQRQSQMPEISTARAPPRRGVSPTSSSHMQEREDRSRYHQSREREHTPLRPPMLSKPPSFHGRHYPPGDTQSENNTPQGFDRPYSWAHDGTPGATPLRQEPDHGTQDKQQVMPNSPFMFSPMHPHQQNFMMHMNMNQPLIPNASFSYPVQQDGNPQYFNAPFQMQLQDAGSDQGSVSVPEGLQRPWGMGLMGNPSQGGGGMA…	TaHAKAI1-A
	TraesCS1B01G181200	MLQIRLSKIGSSDSGAAASGAAAGASGGAPAKSAATAAGGAPESVTVACPDHLVIADLAVAKSLGAVTNSAIAATRAIGRRSRRPLGERVHICSRCEFPIAIYGRLIPCEHAFCLACARSDSSCYLCDERIQKIQTVKMMEGIFICAAPMCLKSFLKKAEFMTHVPEAHANLLQTNTEKEEHNEPDAPNISRASGGDAQRQSQMPEISTARAPPRRGVSPTSSSHMQEREDRSRYHQSREREHTPLRPPMLSKPPSFHGRHYPPGDTQSENNTPQGFDRPYSWAHDGTPGATPLRQEPDHGTQDKQQVMPNSPFMFSPMHPHQQNFMMHMNMNQPLISNASFSYPVQQDGNPQYFSAPFQMQLQDAGSDQGSASVPEGLQRPWGMGLMGNPSQGGGGMA…	TaHAKAI1-B
	TraesCS1D01G150900	MLQIRLSRIGSSDSGAAASGAAAGASGGAPAKSAAAAAGGAPESVTVACPDHLVIADLAVAKSLGAVTNSAIAATRAIGRRSRRPLGERVHICSRCEFPIAINGRLISCEHAFCLACARSDSSCYLCDERIQKIQTVKMMEGIFICAAPMCLKSFLKKAEFMTHVPEAHANLLQTNTEKEERNEPDAPNISRASGGDAQRQSQMPEISTARAPPRRGVSPTSSSHMQEREDRSRYHQSREREHTPLRPPMLSKPPSFHGRHYPPGDTRSENNTPQGFDRSYSWAHDGTPGATPLRQEPDHGTQDKQQVMPNSPFMFSPMHPHQQNFMMHMNMNQPLIPSSSFSYPVQQDGNPQYFSAPFQMQLQDAGSDQGSASVPEGLQRPWGMGLMGNPSQGGGGMA…	TaHAKAI2-D
m6A erasers of Triticum aestivum	TraesCS5D01G482900.1	MAGGRGGRGRGGGRNPATTSSSSSSGRHKYRVSREFGHESPLQSQKEGSSSSSPSVSSKKSPQQMVTPVLPKSLDSPVEPPKSLDSQKEGPCSSSPSVSSKRSQMGTPVLPKSLDSPVQPPKSLYSPLMMAKQVHPPKSQDPLVQTVASIQISRPPEYSSASCGSGAVGSLDSPVQPWKSLDSSLMMSEQVQQPKSQDSLVQMVASIQLSNPLDSSSASTGSGAVGSDLGAAPFDICMGNSKGIFKLNRPLHEIKREEKRLRARELSNSAAQLQHLRPGMVLLKSFLKPDDQVEIIKLCRELGVGTGGFYQPAYRDGGKLSLRMMCLGKNWDPDSRSYGDIRPYDGAQPPQMPQELTKFVEEAIKASHDFLKQRGKGATDPAVELPLMSPDICIVNFYT…	TaALKBH1B
	TraesCS6D01G314200.2	MVTVAAAAASYDDEVHSRAALREAFGDSSDSDSDAPRGAASTPPVHGAGRERWRWAAVAGVRGLWLCAAFLSPDEQSRLLAAIQREEWFTDAHNQAMRFGDLPPWAVELSALVREAICVGGVDASVGAGWMNEDEDACPLPSDLLWREPLFDQLIANRYKPGEGICAHVDLMRFDDGIVIVSLESACVMRFSQEGAACDTQKHGESECTNVPVYLNPGSLVVMSGDARYHWKHEINRKPGAQLWNGSELEQHRRTSVTLRKLRASPN	TaALKBH2B
	TraesCS7D01G075200.1	MGKRGELGDRTYTEPEKWMRGKGRVTIQFGCCYNYATDRKGNPPGIIRTFVSDPIPELFKVMIKRLVRWRILPTDCVPDSCIVNMYDPGDCIPPHIDSHDFVRPFCTVSFLSECDILFGSSLKIAGPGEFTGSFAIPLPVGSVLVINGNGADVAKHCVPAVPSKRISITFRKMDPAKRPFSFKDDPELLNITPLEAPAAPETSRSSDEGKGKQLGVQTRDPGSRSSRSRKSKGRTTPAGKVGWGGILGDQPPQHPQSPISSVSSDRERDSIGWSREPRYPPSSDRERDSVERPREPRYPRDAPSHGEDLRDRLNRPPHERTPGSGVFFVNNGADSQARGQRMEHRQLQMINRTINDDMDSLSVGSHESSEQPRVSVRTIHNRPRTRINLGW	TaALKBH3B
	TraesCS7A01G081300.1	MAAGDGADPMELVRGQYDADELAIAGEFLTTWLPFLSAGLCPSCVGSLRGRVASLLPPPPPPTPRAEEPAPPPPVERVVATGWDSDPAAPRHLPFEPSGWDSDPPPPPPQRQQAEAEKPRMSWADMAQEDELAAAAAAADDDGEEGEEEEAGGAGRPRARLTREQRELHRFRNVLRKDDFICLERVKGQLVNILAGLELHAGVFSTAEQKRIVDCVYGLQEMGKRGELGDRTYTEPEKWMRGKGRVTIQFGCCYNYATDRKGNPPGIIRTFVSDPIPELFKVMIKRLVRWHILPTDCVPDSCIVNMYDPGDCIPPHIDSHDFVRPFCTVSFLSECNILFGSSLKIAGPGEFTGSFAIPLPVGSVLVINGNGADVAKHCVPAVPSKRISITFRKMDPAKR…	TaALKBH4B
	TraesCS7D01G217000.1	MASRLRLGQPSPNPGPGPSPGEGKREEGEARKPEPRREVTDLGGGSEVVHIPRFMARERAWELFEHLNKRIPWTRPTIRVFGRSVVQPRDTCYVADEGLTDLRYSGHQPHPHSWHEFPVLKDILKEVHEALPGSHFNSLLLNRYKGGSDYVSWHADDEPLYGPTPEIASVTFGCEREFLLRKKPANTKSQAAGESGETAPKRLKVSAPQQHSFLLKHGSLLVMRGYTQRDWQHAVPKRARAASTRINLTFRHVLP	TaALKBH5B
	TraesCS1B01G262000.1	MSPSTPSSPSTPSTRTASRRRTAKIPREIRRSGRRPPRKTTPPTTDVNVVKGLKIYEDVFTTMELMKVADFINEIRQAGRNGELSGETFIFFNKQIKGNKREIIQLGVPLFQHTTEETNCHIEPIPVVLQAVIDHLVLWRLIPESRKPNSVVINFFDEDEHSQPYFKPPHLDNPISTLLLSETSMAFGRSLVTDSNGNYKGPLTLSLKQGSLLVMRGNSADMARHVVCPSSNRRVSITFVRVRPSTPVDLSPLPSPTKAMTLWQPPPTAATAGMQKPPHGSNGAIIGYCPAPQAMLAPAWGMAVRAAPVMMVAAPARPMVMAPSSNINKRMGRGGTGVFLPWTVGPKRYNKHLPPRIQKRRFSAMMSPIESQG	TaALKBH6B
	TraesCS5B01G482500.1	MAGGRGRGAGRNPAPSSSSSSSSSRHRKPRSSREFGHESPLQSQKEGSSSSSPSVSSKKSPQQIVTPVLPKSLDSPVQPPKSLDSSLMMAEQVQPLVQRAASIQLSKPLDSSSASCVSGTVGSDLGAAPFDICMGNSKGIVILKHGLLEINREKRRAKELSNIAPVQHLRPGMVLLKNFLKPDDQVKIIKHCRDLGVGPGGFYQPGYREGGKLSLRMMCLGKNWDPDSGKYGDIRPFDAAQPPKIPEELTKLVEDAIKASHEFLEQRGKGATKPAVELPLLSPDICIVNFYTTSGKLGLHQDKDEEESSIAKGLPVVSFSLGDTAEFLYGDVRDEDKASKIKLESGDVLIFGGQSRRIFHGVSSITPKSAPLWVTDKANLRPGRLNLTFRQYKD	TaALKBH7B
	TraesCS1D01G250900.1	MSPSTPSTRTASRRRTAKIPREIRRSGRRPPRKTTPPTTDVNVVKGLKIYEDVFTTMELMKVADFINEIRQAGRNGELSGETFIFFNKQIKGNKREIIQLGVPLFQHTTEETNCHIEPIPVVLQAVIDHLVLWRLIPESRKPNSVIINFFDEDEHSQPYFKPPHLDNPISTLLLSETSMAFGRSLVTDSNGNYKGPLTLSLKQGSLLVMRGNSADMARHVVCPSSNRRVSITFVRVRPSTPVDLSPLPSPTKAMTLWQPPPTAATAGMQKPPHGSNGAIIGYCPAPQAMLAPAWGMAVRAAPVMMVAAPARPMVMAPSSNINKRMGRGGTGVFLPWTVGPKRYNKHLPPRIQKRRFSAMMSPIESQG	TaALKBH8B
	TraesCS6A01G334700.2	MVTVAAAAACYDEEVHSRAALREAFGDSTDSDSDAPRGAASTPPVQGAGRERWRWAAVAEVRGLWLCAAFLSPDEQSRLLAAIQREEWFSDAHNQAMRFGDLPPWAVELSALVREAICVGSVDDASVGTRWMNEDEDACPLPSDLLWREPLFDQLIANTYKPGEGICAHVDLMRFDDGIVIVSLESACVMRFSREGAACDTQKPGESECTNVPVYLNPGSLVVMSGDARYHWKHEINRKPGAQLWNGMELEQHRRTSVTLRKLRASPN	TaALKBH9B
	TraesCS7A01G215100.1	MASRLRLGQPSPNPGPSPSPSPGEGKIEEGEGRKPEPRREVTDLGGGSEVVHIPRFMARERAWELFEHLDKRIPWTRPTIRVFGRSVVQPRDTCYVADKGLTDLRYSGHQPHAHSWDDFPVLKDILKEVHEALPGSHFNSLLLNRYKGCSDYVSWHADDEPLYGPTPEIASVTFGCEREFLLRKKPANTQSQAAGESGETARKRLKVSAPQQHSFLLKHGSLLVMRGYTQRDWQHAVPKRARAASTRINLTFRHVLP	TaALKBH10B
	TraesCS4A01G378300.1	MAQEDELAAAAAEEAAADEDGEEGEEEEAGGAGRPRARLTREQRELHRFRNVLRKDDFICLERVKGSLVNILAGLELHAGVFSTAEQKRIVDCVYGLQEMGKRGELGDRTYTEPEKWMRGKGRVTIQFGCCYNYATDRKGNPPGIIRTFVSDPIPELFKVMIKRLVRWRILPTDCVPDSCIVNMYDPGDCIPPHIDSHDFVRPFCTVSFLSECNILFGSSLKIAGPGEFTGSFAIPLPVGSVLVINGNGADVAKHCVPAVPSKRISITFRKMDPAKRPFSFKDDPELLNITPLEAPAAPETSRSLDEGKGKQLGAQTRDPGSRSSRSRKSKGRTTPAGKAGWGGILGDQPPQHPQSPISSVSSDRERDSIGRSREPRYPPSSDRERDSVERPREPRHPR…	TaALKBH11B
	TraesCS1A01G251400.1	MTTPAAGAPGSPVAAPDQVAARDAVIGWYRGEFAAANAVIDALCGHLAQIGGADYDAVFAALHRRRLNWFPVIHMQKFYSVADVAAELRRVSEARAAAAAAYSEEEAASTVIHEPMDELVVTVAAEPDPEPEREHEPIPEAQPDVSVNPVVAVHPVAADHEPEADGEDSSGDSSERKAASTEDDAAHDGHNTDQGSQGGHSLPESYPICSDHDECIARPERIKIQKGFMAKESVKGHMVNVVKGLKIYEDVFTTMELMKVADFINEIRQAGRNGELSGETFIFFNKQIKGNKREIIQLGVPLFQHTTEETNCHIEPIPVVLQAVIDHLVLWRLIPESRKPNSVIINFFDEDEHSQPYFKPPHLDNPISTLLLSETSMAFGRSLVTDSNGNYKGPLTLSL…	TaALKBH12B
	TraesCS2B01G628500.1	MSTPTPALLPDEGMARVRRKKDFRHMERVDGRMLNNLQDLELHANVFSPDEQAKIVACVLDLQDQGRRGRLRERTYSEPRKWMRGKGRATIQFGCCYNYAADRDGNPPGIVRDEAVDPLPPLLAAMARRLVLWRVLPPSCVPDSCIVNVYDVDDCIPPHVDHHDFLRPFCTASFLAEAPILFGRDMRAVAPGEFSAAASIPLPVGSVLVLNGNGADVAKHCVPAVPAKRISITFRKMDASKVPYGFRPDPLLQSLAAAAVRPAMTAASAPPNRAAWEQSNGEAAKHATPQAQRQQPAAPLYQAAAAVRAGQTQSQSPGGGVPFSLSTDEFPALGASPASGRRPGRR	TaALKBH13B
	TraesCS5A01G470000.1	MAGGRGRGRGDGRNPATSSSSSSSRQRKARGSRDFGPETERSLEPQKEGPSSSSPSVSSKKPQMVTPVLPKSLDSPVQPRKPLNSPLMMAKQVHPPKSQYPLVQTVASIQISKPLNSSSASCGSGTVGSLDSPVQPWKSLDSPLMMAEQVQPPKSQDSLVQMVASMQLSKPLDSSSASTGSGAVGSDLGAAPFDICMGNSKGIFKLNRPLHEINKEKRLRERELSNSAAPPQRLRPGMVLLKNFLKLDDQVEIIKLCRELGVGTGGFYQPGYREGGKLSLRMMCLGKNWDPDSRSYGDIRPFDGAQPPQMPQELTKFVEEAIKASHDFLKQRGKGATEPSVELPQMSPDICIVNFYTTGGKLGLHQDKDEDESSLEKRLPVVSFSLGDTAEFLYGDDRD…	TaALKBH14B
	TraesCS2D01G433200.1	MAKSGYTRPPPVAEDAAALPAPIAVLYVANCGPAVGLTHDDVAAAFGAFGEVQGVSAADDSGARVIVRFREPAAAGAAMAALHGRPCGRLSGRVLHIRYSVPAPPKAPVAVSAPPVALSSSELGIPGIHLVQEFVSAAEEQELLAAVDSRPWKRLAKRRVQHYGYEFLYETRNVDSKQFLGELPSFVSKILEKIVTFPGVKNCTGKLVDQLTVNEYPCGVGLSPHIDTHSAFEEMIFSLSLAGPCIMEFRQYPKGSWRAPSVVSGTDEGSIQDPQCIRKAVFLPPRSMLLMSGEGRYAWHHYIPHHKIDDVAGQVIKRNSRRVSFTLRKVRMGLCECEYGQFCDSQSK	TaALKBH15B
	TraesCS3B01G018500.1	MYAETEPGAAAERTAFRRAEKQYKLYKPPSRKGRSNSRGKPAGGGGGGDLSAVVDFHALLAAGGGELPAGIRRCDRAGFHLPVFCFLDRPGFYFIPGALSTEEQCYWIRESLKTFPQPPNRTNLTATYGPIFDLLIAAKNQKILVEVESSSGKPRDEQNNVGENAHPGKFNFVDGSEIQKGERPKSTTAAALVRKLRRWSTLGLQFDWSKRNYDVSLPHNKIPDDLAALAKKMAVPAMPFGEEFAAEAAIVNYYGPSDMLGGHVDDMEADWTKPIVSISLGCKCIFLLGGKTRDEAPTPMFLRSGDIVLMAGEARERFHGVPRIFTEGDQQDISGLVSELSDDDDRFILDYIHNSRININIRQVY	TaALKBH16B
	TraesCS2A01G436700.1	MAKSGYTRPPPTAEDAAALPAPSAVLYVANCGPAVGLTHDDVAAAFGAFGEVEAVSAADDSGARVIVRFREPAAAGAAMAALHGRPCARLAGRVLHMRYSVPAPPKAPVAVSAPPVALSSSELGIPGVHLVQEFVTAAEEQELLAAVDSRPWKRLAKRRVQHYGYEFLYETRNVDSKQFLGELPSFVSKILDKIVTFPGVKNCTGKLVDQLTVNEYPCGVGLSPHIDTHSAFEEMIFSLSLAGPCIMEFRQYPKGSWRAPSVVNGTDEGSIQDPQCIRKSVFLPPRSMLLMSGEGRYAWHHYIPHHKIDDVAGQVIKRNSRRVSFTLRKVRMGLCECEYGQFCDSQSK	TaALKBH17B
	TraesCS3B01G113400.1	MEEKATQKAAAEGNPSPELCLRIPGDYAVGSIPTVLYVPDFISQTEQAQLLHHIYQAPAPKWKILKNRRLQNWGGVVHEKGLLPQALPPWLTKITGRICQWTGLFPSAINHVLINEYHPNQGIMPHQDGPAYFPVVAIISLASAVVLDFTPHGKLRGLEHTHLQNTQSDELQESNGSYKVEGMKEAGPASSSLLLMPCSLLIFKDQAYTDFLHGIQDNELHNLDKVANVSQCPQFKHLSHDYSPGKADSSVSSEPSGTFRRTTTRVSLTCRLVLNVHSKLFKY	TaALKBH18B
	TraesCS6B01G365100.2	MVTVAAAAASYDDEVHSRAALREAFGDSSDSDSDAPRGAASTPPVHGAGRERWRWAAVAGVRGLWLCAAFLSPDEQSRLLAAIQREEWFTDAHNQAMRFGDLPPWAVELSALVREAICVGDVDASVGAGWMNEDEDACPLPSDLLWREPLFDQLIANRYKPGEGICAHVDLMRFDDGIVIVSLESACVMRFSREGAACDTQKPGESECTNVPVYLKPGSLVVMSGDARYHWKHEINRKPGAQLWNGRELEQHRRTSVTLRKLRASPN	TaALKBH19B
	TraesCS2D01G579000.1	MSSLLPDEGMARVRRKKDFRHMERVDGRMLNILQGLELHANVFSPDEQARIVACVLDLQDQGRRGRLRERTYSEPRKWMRGKGRATIQFGCCYNYAADRDGNPPGIVRDESVDPLPPLLAAMARRLVLWRVLPPSCVPDSCIVNVYDVDDCIPPHVDHHDFLRPFCTASFLAEAPILFGRDMRVVAPGEFSAAASIPLPVGSVLVLAGNGADVAKHCVPAVPAKRISITFRKMDASKVPFGFRPDPLLQSLAAAVVRPAMTAASAPPNRSAWEQGQGEPAKHATPQQQQQQPAAPLYQAAAAVRAGQTQSQSPGGGVPFSLSTDEFPALGASPASGRRPGRR	TaALKBH20B
	TraesCS2D01G579400.1	MSTLLPGEGMARVRRKKDFRHMERVDGRMLNVLQGLELHANVFSPDEQAKIVTCVLDLQDQGRRGRLRERTYSEPRKWMRGKGRATIQFGCCYNYAADRDANPPGIVRDESVDPLPLLLAAMARRLVLWRVLPPTCVPDSCIVNVVVAALSHVGLEDMRVVAPGEFSAATSIPLPVGSVLVLNGNGADAAKHCVPAVPAKRTPSRSGRWTPPIKVPFGFRPDPLLQSLAAAAVRPAAARSAPPSRAAWEQSNGEAAKHATPLQHQPAAPLYQAAAARAGQTKSRSPGGGGPFSLSTDEFPALGASPASGRRPGRR	TaALKBH21B
	TraesCS7B01G122300.1	MASRLRLGQPNPNPGLSPSPGERKGEEGEARKPEPRREVTDLGGGSEVVHIPRFMSRETAWEMFEHLDKRIPWTRPTIRVFGRSVVQPRDTCYVADKGLTDLRYSGHQPHAHSWDDFPVLKDILKEVHEALPGSHFNSLLLNRYKGGSDYVSWHADDEPLYGPTPEIASVTFGCEREFLLRKKPTNTKSQAAAGESGETARKRLKASAPQQHSFLLKHGSLLVMRGYTQRDWQHAVPKRARAASTRINLTFRRVLP	TaALKBH22B
	TraesCS3A01G028300.1	MYAETEPGGAAERTAFRRAEKQYKLYKPPSRKGRSKSRGKQAGGGGFGGGGDLSAVVDFHALLAAGEGELPAGIRRCDRAGFHLPVFCFLDRPGFYFIPGALSTEEQCYWIRESLKTFPQPPNRTNLTATYGPISDLFIAAKNQKILVEVQSSNGQERIEQNNVGENAHPGKFKFVDGSEIQKEERPKSTMAAALVRKLRWSTLGLQFDWSKRNYDVSLPHNKIPDDLATLAKKMAVPAMPSGEEFTAEAAIVNYYGPSDMLGGHVDDMEADWTKPIVSISLGCKCIFLLGGKTRDEAPTPMFLRSGDIVLMAGEARERFHGVPRIFTEGDQQDISGLVSELSDDDDRFILDYIHNSRININIRQVY	TaALKBH23B
	TraesCS2A01G568300.1	MSTPTPALLTDEGMARVRRKKDFRHMERVDGRMLNVLQGLELHANVFSPDEQAKIVACVLDLQDQGRRGRLRERTYSEPRKWMRGKGRATIQFGCCYNYAADRDGNPPGIVRDEAVDPLPPLLAAMARRLVLWRVLPPSCVPDSCIVNVYDVDDCIPPHVDHHDFLRPFCTASFLTEAPILFGKDMRVVAPGEFSAAASIPLPVGSVLVLAGNGADVAKHCVPAVPAKRISITFRKMDASKVPFGFRPDPLLQSLAAAVVRPAMTAASAPPNRAAWEQSNGEAAKHAAPQQQHQPAAPLYKAAAAVRAGQTQSPGGGVSFSLSTDEFPALGASPASGRRPGRR	TaALKBH24B
	TraesCS2B01G456500.1	MAKSGYTRPPPVAEDTAALPAPSAVLYVANCGPAVGLTHDDVAAAFGAFGEVEGVSAADDSGARVIVRFREPAAAGAAMAALHGRPCGRLSGRVLHIRYSVPAPPKAAVAVSAPPVALSSSELGIPGIHLVQEFVTAAEEQELLAAVDSRPWKRLAKRRVQHYGYEFLYETRNVDSKQFLGELPSFVSKVLDKIVTFPGVKNCTGKLVDQLTVNEYPCGVGLSPHIDTHSAFEEMIFSLSLAGPCIMEFRQYPKGSWRAPSVVSGADEGSIQDPQCTRKAVFLPPRSMLLMSGEGRYAWHHYIPHHKVDDVAGQVIKRNSRRVSFTLRKVRMGLCECEYGQFCDSQSK	TaALKBH25B
	TraesCS3A01G097700.1	MEEKSTQKAAAAEEENPSPELCLRIPGDYAVGSIPTVLYVPDFISETEQSQLLHHVYQAPAPKWKILKNRRLQNWGGVVHEKGLLPQALPPWLTKITDRICQWTGLFPSAINHVLINEYHPNQGIMPHQDGPAYFPVVAIISLASPVVLDFTPHGKLRGLEHTYLQNIQTDEPQESNGSYKVEGTKEAGPASSLLLMPCSLLIFKDQAYTDFLHGIQDTELHNLDKVANISQCPQFKHLSYDYSPGKADSSASSEPSGTFHRTTTRVSLTCRLVLKVHNKLFKF	TaALKBH26B
	TraesCS3D01G017600.1	MYAETEPGAAAERTAFRRAEKQYKLYKPPSRKGRSKSRGKQAGGGGFGGGGGGGDLSAVVDFHALLAAGKGELPAGIRRCDRAGFHLPVFCFLDRPGFYFIPGALSTEEQCYWIRESLKTFPQPPNRTNLTATYGPISDLLIAAKNQKILVEVESSSGKPRDEQNNVGENAHPGKFKFVDDSEIQKEERPKSTMAAALVRKLRWSTLGLQFDWSKRNYDVSLPHNKIPDDLATLAKKMAVPAMPSGEEFTAEAAIVNYYGPSDMLGGHVDDMEADWTKPIVSISLGCKCIFLLGGKTRDEAPTPMFLRSGDIVLMAGEARERFHGVPRIFTEGDQQDISGLVSELSDDDDRFILDYIHNSRININIRQVY	TaALKBH27B
	TraesCS3D01G098200.1	MAGRRPPRPFYLPAVPAQNLCPRAGLKNTARPGLPLTNDFREVARASSAEAAMEEKATQKAAAEGNPSPELCLRIPGDYAVGSVPTVLYVPDFISQTEQSQLLHHIYQAPAPKWKILKNRRLQNWGGVVHEKGLLPQALPPWLTKITDRICQWTGLFPSAINHVLINEYHPNQGIMPHQDGPAYFPVVAIISLASPVVLDFTPHGKLRELEHTYLQNTQSDELQESNGSYKVEGTKEAGPASSSLLLMPCSLLIFKDQAYTDFLHGIQDNELHNLDKVANISQCPQFKHLSHDYSPGKADSSASSEPSGTFRRTTTRVSLTCRLVLNVHSKLFKF	TaALKBH28B
	TraesCS4D01G230700.2	MASAAVIPSPAGGAVPVHGAAEPAGWLMDERDGFISWLRGEFAAANAIIDLLVVHLRAVGDPGEYDHVFAAVQQRRHHWAPVIHMQQFFPVADVAYALQQSGWRRRLPPPQQHGPVVSPAPPPPPPRRPSFAPSHNHSHSHHRHAAHHRYDPPRGAGNVPPAGSDKDGREFHNKEGKGLKEGENVADAKGEKNSSLQITAEGSSKVVPTPVEYTTSEIIDGKPVNTVEGLKVYEGLVNVTEINKIVSLVNETKASSRRGGFEVGQTVIVGKRPLKGHGSVIIQLGVPIIEGPLEDENQRETTRVEPVPGLLHDLFDRFFRQGIVPSKPDYCVVDFYYEEEYSHPQQPPSWYGRPLCTLCLTECDMVFGRVIFGERGDNRGPLKLSLSTGSLVVLQGRSA…	TaALKBH29B
m6A readers of Triticum aestivum	TraesCS7D01G276800.1	MESASERTGAMDSPEPRIETIPRKDEKTVKPTISLDSSVINLPSEGQVQAVTSNIGEEHSAAYPQHIYSSQAEPFYYQGTGYENLPNECDVYPPYTSVDGLEVGPAVMYNEEPSMMYHGGYGYDPYAHYSPISTPVPSGVSGDGQLYSPQQFSSAPYYQQPLQPDMAYLGSPTPVSQGETMMPIDPTQSAFIADTLSPNSFHFGPRPEWFRSSQGTGSFLSPATSPQPFGDVSGAFGQSNFPMASGMMPPQQKSFYGFGTPSDSYGRRFSHRGSFPHATNYGSPFPGYGLNGRSLIPVDKERRRGRGNALLCSFVGSLDFLNEQSRGPRSTRPKKQPEDNSKDEKSSAGLDQGSYNRTDFVTEYKNARFFIIKSYSEDNVHKSIKYGVWASTTNGNKKL…	TaECT1
	TraesCS7D01G285000.3	MCACTFLFVDCTILLQSEIVVDNNPSKSVNTKEQIISITAEKTSATDARGSTSLESPKGSQEKANFLGKGGEQPYVYQTNVYAPQPQTVYSGGYINPSGQWEEYPYYVSMEGLHSASPSIMLSPGYANNPQMMYGAYSPVATVGEGQSYSPMHFPFSSPYYQPPASLSMGYSNSSTGMSQGDPMLQQEYFLPDGLLYSPTTVYHQPFESYNRAATQPSNAPGLFGQGNAPLVSGMVNGSGQFCGVAEMIGPVDFDRSVDYWQQDKWSGQFPVKWHIIKDVPNTLLRHITLENNDNKPVTNSRDTQEVKLEYGLQMLSIFKNHEAETSIVEDFDFYEQREKALKENRRQQQPGSAESLKPTDAKAVGNSVTHIADSFSRSVQLKEIEKSDNKLTADGAIS…	TaECT2
	TraesCS7B01G363200.1	MKGEACGFLHQFDKARMPVCRFFRDYGECREPDCAYKHSYDDVKECNMYKMGFCPNGPNCRYKHAKLPGPPPPVEEVLAKIMQMRSSNFNKFNQHRNNNYNQQGDRPRPPPGSGLPNQNSTDNASTMQPAAGQQVQTMNQQPQQKQQQVQQQQQQKPNTNDQVQGVPNGSSNQPTRLATPLPQGSSRYFIVKSCNRENLEISVQQGIWATQRSNEAKLNEAFESMDNVILIFSINRTRNFQGCAKMTSRIGGYIGGGNWKSANGTAHYGRNFSLQWLKKTHHLRNPYNDNLPVKISRDCQELEPFIGEQLASLLYLEPDSELTAMLVAAEAKREEEKAKGVSADEAADNQDIVLFEDNEEEEEEESEEEDENNGQESQGRGRGRGMMWPPQMQMPRGPM…	TaECT3
	TraesCS5D01G396400.2	MVYGSANAGNAQGAGLHVDMQKLSLEGKKDAAGADAAKPSGMQYGSANTGNSQTVEPHVDRSITPLLQEAMDPNFFYQPNGYPSPAYYYPSGYDGSTNEWDTRYAGHEGMEVPQSVYGDMYHGYGYAPYGPYPSGSPVPTVGHDGQSYGTQQYQYPGQYYQQPAPTNAMHGVNSANPQSELPSAAAHQARATVVSAKVTTGTASGIANAASSLPRKQTHHHVSVTNSGSYGRGPSQGGPSASNFGHTGHRSPAQWYDGPVYSNGHQRSIASSTSYGSNSSSAKNQSHRPTTNLMGMHTHGPSSGMGLTSPSYSSRMYPDSRLYGQYGQYGNTLKAGLGFGSNVYNSRNNGQWGVVDTVKYKPRNRATFGFGSENQDGFTELNRGPRSGGFRHQKPFGPT…	TaECT4
	TraesCS1B01G057800.1	MESARAGSERTGTMDSPEPRIEVEQKPVLASNTKEQTIPAKDEKTVKPTISLDSSVINLPSDGQAQAGTSNIGGEHNVVFPQHMYSSQAQPFYYQGPGYENPPNEWDVYPPYAEGLEAGPAVVYNEDPSMMYHGGYGYDPYAHYSPISTPVPAGVSGDGQLYSPQQFSFSAPYYQQPVQPGMPYLSSPTPISQGEAMMPIDPTQGAFMADTLSPNSFLFGPRPEWFRSSEGTGSFPSPAASPQPFGGVSGPFGQSNFPMASGMMSPQQKSFFGFGTPGDSYGRGFSHSGGFPQATNYGGPFPGYGMNGRSFIPIDKGRRRGRGNSLLCSCDGPLDFLNEQSRGPRATRPKKQPEDDSKDEKPSVGLNQEPYNRADFVIEYKNARFFIIKSYSEDNVHKS…	TaECT5
	TraesCS5D01G439100.1	MAAAAAAADQATNLLQKLSLDAKAEAIDAPAAKEKASGGLGGKLNGVAATGKPRAAEQWANPQDYSDASMYYGAYPAAYYCAGWGDYSMYLNQDGVETPTAGAYGDMYCYPQYGHDGQMYGSQQYQYPSSYHQPQNTATSAPKATANSVDEVKGLKKTSTPLNPSGNNGSYLNQSSRPAYPWYGGQIYQGKQQKPSSGNPTSTDSNPKSKVQSKNQNTQPLPPLMSLPNSPVASMYAANGMYNSNAYGGFWYGSQFYGPGMYGGWNNLSDGKYKPRGRTAYGSYGFPNENLDGLNELKRGPRSGLSNNQQGFGPAAATAVKAQDVSATDGSNAVVQDQYNGSDLADTYENAKFFIIKSYSEDDVHKSIKYNVWASTPNGNKKLDSTYLEAKSVNSPVFL…	TaECT6
	TraesCS5D01G439200.1	MAPAAAHAADHAADLLHTLSLDPKGVAGQGKDAQRKVSAAPNGRLNGVVASPNPQVASAGQWPAMGQQDYKNANMYGAGADAYQYYYGGWGDYSVYVGLDGAESLNPGAYGDMYCYPQYGVASSGYDAQMYGSQHYQYPSTYLQPQTASTTKPAYKPNAGKSDPLPQKDASAAPAAYQKPGLVDASKANSNSTDSSTGLKKTTYPVKPSGRSASYQNHGDKAAYPSYGGHTQQKLPVGNTTSTASNPKTKGLLGQNSAMGPQTPGYMSSMYSSVMYNANAYAPDYWYGSHLYGSGMYGGWNVLSDGKYKPRPKTYGSYRFGNENIDGLNELKRGPRSTVIKNEQGAGEAAVAPAKGQELSTGDASNAVVQDQYNKADFVETYSDAKFFVIKSYSEDDVH…	TaECT7
	TraesCS1B01G128700.1	MDLEANSELIFGEEFCFPANATYYPTPYGPTGITLPAELYEHQAIWRCGDQDLHYLGQQAEGTSYSYYVVPDYGIAHSPRGPYPSGHCAIADGRFARSREYLAKTADIACHQPVPIPHYDLPSAAQWGPASTSQTLMCNDSLFIPTDQGQSFPVVPKKGITWNPSLQSTSVSSKKFENHAMLSTVQLHSTDPWKQNLAAGSGTMVPAKLGRALQASRHSLHGGVPPVKSSPQTNPSYNYNASHVGSDLRKMAIAEKFQPSSKPRSYVNGLTGKLSSVCRLNLSKEKQPRGSTSSEIVATSYTSRLRIGNPEGKIIIKTDQYNRDDFEVVYPNAKFFVIKSWGEANVHKSIKYGVWSSGLQGNKKLDSAFRDAQMIAASSSTLCPVFLFFSVNESNHFCG…	TaECT8
	TraesCS1D01G109300.1	MDLEANSELIFGEEFCFPANATYYPTPYGPTGITLPAELYEHQAIWRCGDQDLHYLGQQAEGTSYSYYVVPDYGIAHSPRPRGPYPSEHCAIADGRFARSREYLAKTADIVCHQPVPIPHYDVLPSAAQWGPASTSQTLMCNDSLFIPTDQGQSFPVVPKKGITWNPSLQSTSVSSKKFENHAMLSTVQLHSTDPWKQNLAAGSGTMVPAKLRRALQASRHSLHGGVPPVKSSPQTNPSYNYNASHVGSDLRKMAIAEKFQPSSKPRSYVNGLTGKLSSVCRPNLSKEKQPRGSTSSEIVATSYTSRLHIGNPEGKIIIKTDQYNRDDFEVVYPNAKFFVIKSWGEANVHKSIKYGVWSSGLQGNKKLDSAFRDAQMIAASSSTLCPVFLFFSVNESNH…	TaECT9
	TraesCS4A01G125600.1	MMSGFGTNSAMGSSSLPSRVVYNTGNDLPVEYIYDQGLSYPATNGYAYYAGFEPPVGWSENTNYWGVDGQYLQLTNDNLPYVYCTPGYEFSYSSQDQYTSYMPGMFMGVDGSVVGSQQYFTNPYQPPGSPSGYFPVYLQPTTDLSSAVSLEPPVFSTGTSVASRPVNTSIKDTHQMSGNTMASRTVSSASPAIGSSHHAYQNQSTNKPSDLPGANVARHDKPSTSHLTVLVDTDKNFQAASGMGSSGDNGQITDRTEVVPVAAMVGEDAKFFVIKSYSEDDVHKSIKYNVWSSTPNGNRRLDAAYSEAKGSQRKCPIFLFFSVNTSGQFCGVAEMVGPVDFHKDMDFWQQDKWSGSFPLKWHLVKDVPNSTFRHIILENNENKPVTNSRDTQEMPYKSG…	TaECT10
	TraesCS5B01G391500.3	MVYGSANAGNAQGAGLHVDMQKLSLEGKKDAAGADAAKPSGMQYGSANTGNSQTVEPHVDRSITPLLQEAMDPNFFYQPNGYPSPAYYYPSGYDGSTNEWDTRYAGHEGMEVPQSVYGDMYHGYGYAPYGPYPSGSPVPTVGHDGQSYGTQQYQYPGQYYQQPAPTNAMHGINSANPQSELPSAAAHQTRATVVSAKVTTGTATGIANAASSLPRKQTHHHVSVTNSGSYGRGPSQGGPSASNFGHTGHRSPAQWYDGPVYSNGHQRSIASSTSYGSNSSSAKNQSHRPTTNLMGMHTHGPSSGMGLTSPSYSSRMYPDSRLYGQYGQYGNTLKAGLGFGSNVYNSRNNGQWGVVDTVKYKPRNRATFGFGSENQDGFTELNRGPRSGGFRHQKPFGPT…	TaECT11
	TraesCS5B01G432900.1	MAPAAARAADHAADLLHKLSLDPKGVAGQGKEAQRKVSAAPNGRLNGVVASPSPQVASAGQWPAMGLQDYKNANMYGAGADAYQYYYGGWGDYSVYVGLDGAESLNPGAYGDMYCYPQYGVASSGYDGQMYGSQHYQYPSTFLQPQTTSTTKPAYKPNAGKSDPLPQKDASAAPAAYQKPGLVNASKANSTSADGSTGLKKTTYPVKPSGRSASYQNNGDKAAYPSYGGHTQQKLPVGNTTSTASNPKTKGLLGQNSAMGPQTPGYMSSMYSSVMYNANAYGPDYWYGSHLYGSGMYGGWNVLSDGKYKPRPKTYGSYRFGNENIDGLNELKRGPRSTAIKNEQGTGEAAVAPAKGQELPTGDASNAVVQDQYNKADFAETYSDAKFFIIKSYSEDDVH…	TaECT12
	TraesCS5B01G433000.3	MAAAAAAADQATNLLQKLSLDAKTEAIDAPAAKEKASGGLGGKLNGVAATRNPRAAEQWANPQDYSDASMYYGAYPAAYYCAGWGDYSMYLNQDGVETPAAGAYGDMYCYPQYGHDGQMYGSQQYQYPSSYHQPQNTASKPQYKSKTDKLAPSKDISSAVADPLPAVVSAPKATSNSVDEGKQQKPSSGNPTSTDSNPKSKVQSKNQNTQPLPPLMSLPNSPLASMYAANGMYNSSAYGGFWYGSQFYGPGMYGGWNNLSDGKYKPRGRTAYGSYGFPNENLDGLNELKRGPRSGLSNNQHGFVPAAATAVKAQDVSATDGSNAVVQDQYNGSDLADTYENAKFFIIKSYSEDDVHKSIKYNVWASTPNGNRKLDSAYLEAKSGNSPVFLLFSVNTSGQ…	TaECT13
	TraesCS1A01G105700.1	MDLEANSELIFGEEFCFPANATYYPTPYGPTGITLPAELYEHQAIWRCGDQDLHYLGQQAEGTSYSYYVVPDYGIAHSPRGPYPSEHCTIADGRFARSREYLAKTADIACHQPVPIPHYDVLPPAAQWGPASTSQTLTFNDSLFIPTDQGQSFPAVPKKGITWNPSLQSTSVSSKKFENHAMLSTVQLHSTDSWKQNLAAGSRTMVPAKLHRALQASRHSLHGGVPPVKSSPQTNPSYNYNASHVGSDLRKMAMAEKFQPSSKPRSHVNGLTGKLSSVCWPNLSKEKQPRGSMSSEIVATSYTSKLHIGNPEGKIIIKTDQYNRDDFEVVYPNAKFFVIKSWGEANVHKSIKYGVWSSGLQGNKKLDSAFRDAQMIAASSSTLCPVFLFFSVNESNHFC…	TaECT14
	TraesCS7A01G276800.1	MVAMVMTLMLIILLSRHQYRLVLVEMGETMMPIDPTQSAFIADTLSPNSFLFGPRPEWFRSSQGTGSFLSPATSPQPFGDVSGAFGQSNFPMASGMMPPQQKSFYGFGTPSDSYGRRFSHRGSFPHATNYGSPFPGYGLNGRSLNPVDKERRRGRGNALLCSFVGSLDFLNEQSRGPRSTRPKKQREDNSKDEKSSAGLDQGSYNRTDFVTEYKNARFFIIKSYSEDNVHKSIKYGVWASTTNGNKKLDGAYHEVKKEEHCPIFLLFSVNASAQFCGVAEMTGPVNFEKSVDYWQQDKWTGQFPVNWHILKDVPNNLFRHIILENNEHKPVTNSRDTQEVKLEQGQEMLKIFKDHEEDASILDDFNFYEEREKALLENKARLYQQQQISSSTVAEPKKP…	TaECT15
	TraesCS7A01G291700.5	MCACAFLFVDCTILLQSEIVVDNNPSKSVNTKEQIISITAEKTSATDARGSTSLKSPKGAQEKANFLGKGGEQPYVYQTNVYAPQPQTVYSGGYINPSGQWEEYPYYVSMEGLHSASPSIMLSPGYANNPQMMYGAYSPVATVEEGQSYSPMHFPFSCPYYQPPASLSMGYSNSSTGMSQGDPMLQQEYFLPDGLLYSPTTVYHQPFESYNRAATQPNNAPGLFGQGNAPLVSGMVNGSGQFCGVAEMIGPVDFDRSVDYWQQDKWSGQFPVKWHIIKDVPNTLLRHITLENNDNKPVTNSRDTQEVKLEYGLQMLSIFKNHEAETSIVEDFYFYEQREKALKENRRQQQPGSAESLKPTDAKAVGNSVTHIADSFSRSVQLKEIEKSDNKRDGAISMN…	TaECT16
	TraesCS2A01G011400.1	MKEAFDPPASAAAATPEADNGGASVFTRKNIWSDAAAEGDDDSLPWPWDGVKSEEDADFLSHANRALSFLDYEAESSECKYATDIGSHVYPKEAMSPQSEYDRQRPYLPLSSCSWDSSSSLEAMSGNRDASGHVMAKGGTKSDIFAPRHDYLTSGPTTGPHMRRSYTEAAKVDCSFDCHSEHHYKGLDRFTPFANCNGQSIECRSEIVDMPRGGRCVDEATSFSSRWCFENGGRGSSLPGGLTYGDEIPSLSSRRCNGSGVLSRSSQWHYGAEISSLSSRQGYGDEIPSLSNQKFNGISRSNHWNYSAEIPSLSRRQSYRDEIPSLSSQKSNGISYPRQWQQYGADIPSFSTRQGYGEEVPTMSHHWRYRDKIPLYSGQRCHDAESRRLSSYQQGPFRG…	TaECT17
	TraesCS5A01G386600.2	MVYGSANAGNGQGAGLHVDMQKLSLEGKKDAAGAADAAKPSGMQYGSANTGNSQTVEPHVDRSITPLLQEAMDPNFFYQPNGYPSPAYYYPSGYDGSTNEWDTRYAGHEGMEVPQQSVYGDMYHGYGYAPYGPYPSGSPVPTVGHEGQSYGTQQYQYPGQYYQQPAPTNAMHGVNSANPQSELPSAAAHQPRATVVSAKVTTGTASGIANAASSLPRKQTHHHVSVTNSGSYGRGPSQGGPSASNFGHTGHRSPAQWYDGPVYSNGHQGSIASSTSYGSNSSSAKNQSHRPTTNLMGMHTHVPSSGMGLTSPSYSSRMYPDSRLYGQYGQYGNTLKAGLGFGSNVYNSRNNGQWGVVDTVKYKPRNRATFGFGSENQDGFTELNRGPRSGGFRHQKPFG…	TaECT18
	TraesCS1D01G045100.1	MESARAGSERAGTMDSPEPRIEVEQKPVLASNTKEQTIPVKDEKTVKPTISLDSSVINLPSDVQAQAGTSNIGGEHNVLYPQHMYSSQAQPFYYQGPGYENPPNEWDVYPPYAEGLEAGPAVVYNEDPSMMYHGGYGYDPYAHYSPISTPVPAGVSGDGQLYSPQQFSFSAPYYQQPVQPGMPYLSSPTPISQGETMMPIDPTQGAFMADTLSPNSFLFGPRPEWFRSSEGTGSFPSPAASPQPFGGVSGPFGQSNFPMASGMMSPQQKSFFGFGTPGDSYGRGFSHSGGFPQATNYGGPFPGYGMNGRSFIPIDKGRRRGRGNSLLCSCDGPLDFLNEQSRGPRATRPKKQPEDDSKDEKPSVGLDQEPYNRADFVTEYKNARFFIIKSYSEDNVHKS…	TaECT19
	TraesCS4D01G273200.1	MSLESQPQPKAAADGTELAGATKQGPVASQPLSVSIPQDRSITPVVQDFTDPNMFYLPAYYYGGYDGTMSEWDEYTRYVNQDGVEVTPAVYGDIYGYGYAPYGAYSPASSPVPTVDGQMFAAQHYQYPAYYQPPTPISSTTQGDQQHSANADNKPAAKADAAKTTTNVVPNGTAQSNSGTAPLGSSYQNSSLTPDGTYRAPLIGGVPSTGYVDSTYGYDTTGAHYAWYDGSAYTNAQQRPTTANYTPSSAYNSNGSSARYQTKSPTPQQTGNRRPTTTTGSATPTYPNRMYSSTQSYNQYGNSVKTGLMYGNTGYGSTGYGSTGYGSSGYGGSGYGSNGYDSRLYGRWGVSMDSRYNRPRGRGNGYYGFGNESQDGTIELNRGPRSGRFKNQKAFGHTV…	TaECT20
	TraesCS5A01G431100.1	MAPAVAHAADHAADLLHKLSLDPKGVAGQGKEAQKKVSAAPNGRMNGVVASPNPQVASAGQWPAMGLQDYKNANMYGAGADAYQYYYGGWGDYSVYVGLDGAESLNPGAYGDMYCYPQYGVASSGYDAQMYGSQHYQYPSTYLQPQTTGTTKPAFKPNAGKSDLLPQKDASAAPAAYQKPGLVDASKANSNSTDSSTGLKKTTYPVKPSGRSASYQNHGDKAAYPSYGGHTQQKLSVGNSTSTASNPKTKGLLGQNSALGPQTPGYMSSMYSSVMYNANAYGPDYWYGSHLYGSGMYGGWNVLSDGKYKPRPKTYGSYRFGNENIDGLNELKRGPRSTVIKNEQGAGEAAVAPAKGQELPTGDASNAVVQDQYNKADFVETYSDAKFFVIKSYSEDDVH…	TaECT21
	TraesCS5A01G431200.1	MAAAAAAAADQATNLLQKLSLDAKTEAIDAPAAKEKASGGLGGKLNGVAATRNPRASEQWANPQDYSDASMYYGAYPAAYYCAGWGDYSMYLNQDGVETPTAGAYGDMYCYPQYGHDGQMYGSQQYQYPSSYHQPQNTATSAPKATANSVDEVKGLKKTSTPLNPSGNNGSYLNQSSRPAYPWYGGQIYQGKQQKPSSGNPTSTDSNPKSKVQSKNQNTQPLPPLMSLPNSPVASMYATNGMYNSNAYGGFWYGSQFYGPGMYGGWNNLSDGKYKPRGRTAYGSYGFPNENLDGLNELKRGPRSGLYNNQQGFGPAAVTAVKAQDVSATDGSNAVVQDQYNGSDLADTYENAKCFIIKSYSEDDVHKSIKYNVWASTPNGNKKLDSAYLEAKSVNSPVF…	TaECT22
	TraesCS2D01G012200.1	MKEAFDPPASAAAATPEADNGASIFTRKNIWSDAAAEGDDDSSPWPWDGVKSEEDADFLSHANRALSFLDYEAESSECKYATDIGSHVYPKEAMSPQSEYDRQRPYLPLSSCSWDSSSSLEAMSGNRDASGHVMAKGGTKSDIFAPRHDYLASCPTTGPHMRRSYTEAAKVDCSFDCHSEQHYKGLDRFTPFANCNGQSIECRSEIADMPRGGRCVDEATSFSSRWCFENGGRGSSLPGGLTYGDEIPSLSSRRCNGSGVLSRSSQWHYGAEISSLSSRQGYGDEIPSLSNQKFNGISRSNHWNYSAEIPSLSRRQSYRDEIPSLSSQKSNGISYPRQWQQYGADIPSFSSRQGYGEEVPTMSHHWRCRDKIPLYSGQRCHDAEARRLSSYQQGPFRGN…	TaECT23
	TraesCS3D01G199400.1	MEMTPELLYGQNVYVPTAVNSYTYGYAEVGSPMDWYNHQNSLGYDAQDVYFPAFQTDGTQCVYYATPDNGSVHPSYSPYPMDPGYIVDGSYLPQEYVPDTDPTCQFQNHSMIPIVQLHNSLPMKQELGNGSMVSVKPLHTPQAPTNVLDSPMAAAKHSPKAKLSGNDCFACVGSDPQKWASAEKFQPTSKSSGQLKAHGSSNAEKHSGQRSPAIVAKSYTSRLIVGNSDGTILIRSDQYNGNDLRVDNPYAKFFVIKSIGEADIHKSIKYGVWSSSSSGNSKLDCAYRDADRIAKRNSTKCPVFLFFSVNGSGHFCGLAEMVGPVDFHKDMDFWCQDKWTGCFPVRWHIIKDVPNYTLQNILLQNNENKPVTHSRDTQEVPYVPGISVLKILKDIKVKE…	TaECT24
	TraesCS3D01G267900.1	MEPKPNTALAHKPIEEAVENLKIDASTKASNGNLPAAKDAGSSDAISCISSADAASTAAKDTEMNQGAYMGDQGMYYYGYYYPGSFGGWDESSYYAGSNGLEMQPTVVQAENGSYLCYVPGYENGYTAYSPVVPGTGVDSQYVSKEPYYSAVIPVQDPSTPGMYAQPIAYGPELVPAYTWDPYVLLDGVQGLPVGVQQTNYPTRSNYPSNKHAVPSSKASRSTKYASGTTKGSSSAVDTVPTSANNHPSSKFANKASGASITKGHLPSSKFVVHTNQGKGSLYQSKGINLNESGRNCNGNEKLKARSKLNEFGNRDISDKHNDESKNSLSPGADRFGLSGVQEVNDDIPSLVAVRRDSYNLPDFVTKYEQALFFVIKSYSEDDIHKSIKYNVWASTPNG…	TaECT25
	TraesCS2B01G010200.1	MKEAFDPPASVAAATPEAENTASLFTKKNIWSGAAAEGDDDSSPWPCTCPGDGVKSEEDADFLSHANRALSFLDYEAESSECKYATDIGSHVYPKEAMSPRSEYDRQRPYLPLSSCSWDSSSSLEAMSGNRDASGHVMAKGGTKSDIFAPRHDYLTSCPTTGPHMRRSYTEAAKVDCSFDCHPEHHYKGLDRFTPFANCNGQSIECRSEIVDMPRGGRCVDEATSFSSRWCFKNGGRGSSLPGGLTYGDEIPSLSSRRCNGNGVLSRSSQWHYGAEISSLSSRQGYGDEIPSLSNQKFNGISRSNHWNYSAEIPSLSCRQSYRDEIPSLSSQKSNGISYPRQWQQYGADIPSFSSRQGYGEEVPTMSHHWRYRDKIPLYSGQRCHDAEARRLSSYQQGP…	TaECT26
	TraesCS4B01G179100.4	MGLSYPATNGYAYYGGFEPPVGWSENTNYWGVDGQYLQLTNDNLPYVYCTPGYEFSYSSQDQYTSYMPGMFMGVDGSVVGSQQYFTNPYQPPGSPSGYFPVYLQPTTDLSSAVSLEPPVFSTGTSVASRPANTSIKDTHQMSGNTMASRTVPSASPAIGSSHRAYQNQSTNKPSDLPGANVARHDKPSTSHLTVLVDTDKNFQTASGMGSSGDNGQITDRAEVAPVAAMVGEGAQSKAVSSSAVKNIVIHPDQYNKADFPCDHPDAKFFVIKSYSEDDVHKSIKYNVWSSTPNGNRRLDAAYSEAKGSQRKCPIFLFFSVNTSGQFCGVAEMVGPVDFHKDMDFWQQDKWSGSFPLKWHLVKDVPNSTFRHIILENNENKPVTNSRDTQEIPYKSGINM…	TaECT27
	TraesCS7B01G174500.1	MESVSERTGAMDSPEPRIETIPRKDEKTVKPTISLDSSVINLPSEGQVQAVTSNIGGEHRAAYPQHIYSSQAQPFYYQGTGYENLPNECDVYPPYTSVDGLEVGPAVIYNEDPSMMYHGGYGYDPYAHYSPISTPVSAGVSGNGSPTPVSQGETMMPIDPTQSAFIADTLSPNSFLFGPRPEWFRSSQGTGSFLSPATSPQPLGDVSGAFGQSNFPMASGMMPPQQKSFYGFGTPSDSYGRRFSHRGSFPHTTNYGSPFPGYGLNGRSLIPVDKERRRGRGNPLLCSFVGSLDFLNEQSRGPRSTRPKKQPEDNSKDEKSSAGLDQGSYNRTDFVTEYKNARFFIIKSYSEDNVHKSIKYGVWASTTNGNKKLDGAYHEVKKEEHCPIFLLFSVNASAQ…	TaECT28
	TraesCS7B01G182100.2	MALSGGDPSGFVDCTILLQSEIVVDNSPSKSVNTKEQIISITAEKTSATDARGSTSLKSPEGAHEKANFLGKGGEQPYVYQPNVNVPQPQTVYSGGYINPSGQWEEYPYYVSMEGLHSASPSIMLSPGYANNPQMMYGAYSPVSTVGEGQSYSPMHFPFSSPYYQPPASLSMGYSNSSTGMSQGDPMLQQEYFLPDGLLYSPTTVYHQPFESYNRAATQPSSAPGLFGQGNAPLVSGMQHGSMYNSGSYKARQQASKYGGTTPNWGSAGRRFNNFDYNSSQQRGSMPFNIQNGALEFLNEQNRGPRAAKPKKQDRDNSLVDDKSEKTTQLIDSELYNCPDFATEYKDAIFFVIKSYTEDHVHRSIKYNVWASTASGNRKLDSAYRAAKQKEDHCRVFLF…	TaECT29
	TraesCS3B01G232300.1	MVMQAFQTDGTQVVYYATPDNGSVHPSYSPYPMDPGYIIDGSYLPQEYVPDTDPTCQVVPSSYYIPSVLPYAVDSVLGITATSLHPSSVAFIPSMPAYAVTSTNHVLPSMALVAPKNDVVVNPPVQSTIVSSKQFQNHSMIPIVQLHNSLPMKQELGNGSMVSIKPLHTPQAPTNVLDRPMAAAKHSPKAKLSGNDCFACVGSDPQKWASAEKFQPTSKSSGQLKAHGSSNAEKHSGQRSPAIVAKSYTSRLIVGNLDGTILIRPDQYNGNDLQVDNPYAKFFVIKSIGEADIHKSIKYGVWSSSSSGNSKLDCAYRDADRIAKRNSTKCPVFLFFSVNGSGHFCGLAEMVGPVDFHKDMDFWCQDKWTGCFPVRWHIIKDVPNYTLQNILLQNNENKP…	TaECT30
	TraesCS4B01G274500.1	MAVVAPTPAPPAAPAPAAAAAAPAPALAPAPAADPTDLLQKMSLESQPKAAADGTELAGATKQGPVASQPLSVSIPQDRSITPVVQDFTDPNMFYLPAYYYGGYDGTMSEWDEYTRYVNQDGVEVTPAVYGDIYGYGYAPYGAYSPASSPVPTVDGQMFAAQHYQYPAYYQPPTPIPSTTQGDQQPSANADNKPAAKADAAKTTTNGVPNVSAQSNSATAPLGSSYQNSSLTPDGTYRAPLLGGVPSTGYVDSTYGYDTTGAHYAWYDGSAYTNAQQRPTTANYTPSSAYNSNGSSARYQTKSPTPQQTGNRRPTTTTGSATPTYPNRMYSSTQSYNQYGNSVKTGLMYGNTGYGSTGYGSSGYGSNGYGSSGYGSSGYGSSGYDSRLYGRWGVSMDTR…	TaECT31
	TraesCS3A01G199100.1	MVMQAFQTDGTQCVYYATPDNGSVHPSYSPYPMDPGYIVDGSYLPQEYVPDADPTCQVVPSSYYIPSVLPYAVDSVLGITATSLHPSSVAFIPSMPAYAVTSTNHVLPSMALVAPKNDVVVNPPVQSTIVSSKQFQNHSMMPIVQLHNSLPMKQELGNGSMVPVKPLHTPQAPTNVLDSPMAAAKHSPKAKLSGNDCFACVGSDPQKWASAEKFQPTSKSSGQLKAHGSSNAEKHSGQRSPAIVAKSYTSRLIVGNSDGTIIIRPDQYNGNDLRVDNPYAKFFVIKSIGEADIHKSIKYGVWSSSSSGNSKLDCAYRDADRIAKRNSTKCPVFLFFSVNGSGHFCGLAEMVGPVDFHKDMDFWCQDKWTGCFPVRWHIIKDVPNYTLQNILLQNNENKP…	TaECT32
	TraesCS3A01G267700.1	MEPKPNTALARKPIEEAVDNLTIDASTKASNGNLPAAKDVSSSDAISCISSADAASTAAKDAEMNQVTYMGDQGMCYYGYYYPGSFGGWDENSYYAGSNGLEMQPTVVQAENGSYLCYVPGYENGYTAYSPVVPGNGVDGQYVSKEPYYSAVVPVQDPSTPGMYAQPIAYGPELVPAYTWDPYVLLDGVQGHPVGVHQTNYPTRSNYPSNKHAVPSSKASRSTKYASGTTKGSSSAVDTVPTSANNHPSSKFANKVSGASITKGHLPSSKFVAHTNQGKGSFYQSKGINLNESGRNCNGNEKLKARSKLNEFGDRDVSDKPNDDSKNSLSPGADRFGLSGVQEVNDDIPSLVAVRRDSYNLPDFVTKYEQALFFVIKSYSEDDIHKSIKYNVWASTPNG…	TaECT33
	TraesCS4A01G031600.1	MSLESQPKAAEDGTELAGAPKGPVASQPLSVSIPQDRSITPVVQDFTDPNMFYLPAYYYGELGLPGYDGTMSEWDEYTRYVNQDGVEVTPAVYGDIYGYGYAPYGAYSPASSPVPTVDGQMFAAQHYQYPAYYQPPTPVSSTTQGEQQPSANADNKPAAAKADAAKTTTNVAPNGTAQSNSGTAPLGSSYQNSSLTPDGTYRAPLLGGVPSTGYVDSTYGYDTTGAHYAWYDGSAYTNAQQRPTTANYTPSSAYNSNGSSARYQTKSPTPQQTGNRRPTTTTGSATPTYPNRMYSSTQSYNQYGNSVKTGLMYGNTGYGSTGYGSTGYGSSGYGSNGYGSSGYGSSGYGSNGYDSRLYGRWGVSMDSRYNRPRGRGNGYYGFGNESQDGTIELNRGPRS…	TaECT34
	TraesCS4D01G180500.5	MSGFGTNSAMGSSSLPSRVVYNTGNDLPVEYIYDQGLSYPATNGYAYYGGFEPPVGWSENTNYWGVDGQYLQLTNDNLPYVYCTPGYEFSYSSQDQYTSYMPGMFMGVDGSVVGSQQYFTNPYQPPGSPSGYFPVYLQPTTDLSSAVSLEPPVFSTGTSVASWPANTSIKDTHQMSGNTMASRTVPSASPAIGSSHRAYQNQSTNKPSDLPGANVARHDKPSTSHLTVLVDTDKKFQAASGMGSSGDNGQITDRAEVAPVAAMVGEGAQSKAVSSSAVKNIVIHPDQYNKADFPCDHPDAKFFVIKSYSEDDVHKSIKYNVWSSTPNGNRRLDAAYSEAKGSQRKCPIFLFFSVNTSGQFCGVAEMVGPVDFHKDMDFWQQDKWSGSFPLKWHLVKDVP…	TaECT35
	TraesCS3B01G301100.1	MEPKPNTALAHKPIEEAVDNLKIDASTKASNGNLPAAKDASSSDAISCISSADAASTAAKDTEMNQGAYMGDQGMYYYGYYYPGSFGGWDENGYYAGSNGLEMQPTVVQAENGSYLCYVPGYENGYTAYSPVVPGTGVDSQYVNKEPYYSAVIPVQDPSTPGMYAQPIAYGPELVPAYTWDPYVLLDGVQGHPVGVQQTNYPTRSNYPSNKHAVPSSKASRSTKYAPGTTKGSSSAVDTVPTSANNYPSSKFANKASGASITKGHLPSSKFVVHTNQGKGSLYQSKGINLNESGRNCNGNEKLKARSKLNEFGDRDISDKHNDESKIFLSPGADRFGLSGVQEVNDDIPSLVAVRRDSYNLPDFVTKYEQALFFVIKSYSEDDIHKSIKYNVWASTPNG…	TaECT36
	TraesCS7D01G285000.1	MCACTFLFVDCTILLQSEIVVDNNPSKSVNTKEQIISITAEKTSATDARGSTSLESPKGSQEKANFLGKGGEQPYVYQTNVYAPQPQTVYSGGYINPSGQWEEYPYYVSMEGLHSASPSIMLSPGYANNPQMMYGAYSPVATVGEGQSYSPMHFPFSSPYYQPPASLSMGYSNSSTGMSQGDPMLQQEYFLPDGLLYSPTTVYHQPFESYNRDWSEPFQTNCEFLPQRQHNQAMLRDYLGKGMHHWFLECIDYACYLQQHGSMYNSGSYKARQQASKYGGITPNWGSAGRRFNNFDYNSSQQRVSMPFNIQNGALEFLNEQNRGPRAAKPKKQDRDNSLVDDKSEKTTQLIDSELYNCPDFATEYKDAIFFVIKSYTEDHVHRSIKYNVWASTASGNRK…	TaCPSF30-1
	TraesCS6A01G138900.1	MDGDGDGDGDGSLRFDFEDDVDASSAGSGSASSEAPILAVGGPSRGRGHGSIEMDGDEDSLRFDFEDGLDAAGAGTESSAWPFEAPIPSAGGPSHGPGSRSIQMDGDEGSLRFDIEDYLDSVAAGSGSDEEIPECRMFSVGFCLNGSNCKCMHVKLPGSPPVQEVLQKFQQTNAYNYGSSSTTYQPRDNNCKQKAKPQVQHESVLKNQNLAVNATLVAQQPAAQHVQTANPPPHLQQQQNAQVQGVHNGSSIQKLPQLQAHFHKGNQGTWLLNVATRRIWILVQWGVCAPQKGLMR	TaCPSF30-2
	TraesCS1A01G044500.1	MESARAGSERAGTMDSPEPRIEVEQKPVLASNTKEQTIPGKDEKTVKPTISLDSSVINLPSDGQAQAGTSNIGGEHNVVYPQHMYSSQAQPFYYQGSGYENPPNEWDVYPPYAEGLEAGPAVVYNEDPSMMYHGGYGYDPYAHYSPISTPVPAGVSGDGQLYSPQQFSFSAPYYQQPVQPGMPYLSSPTPISQGETMMPIDPTQGAFMADTLSPNSFLFGPRPEWFRSSEGTGSFPSPAASPQPFGGVSGPFGQSNFPMASGMMSPQQKSFFGFGTPGDSYGRGFSHSGGFPQATNYGGPFPGYGMNGRSFIPIDKGRRRGRGNSLLCSCDGPLDFLNEQSRGPRATRPKKQAEDDSKDEKPSVGLNQEPYNRADFVTEYKNARFFIIKSYSEDNVHKS…	TaCPSF30-3
	TraesCS7A01G461800.1	MDDGDGGLSFDFEGGLDTGPAAGGLALSSADAGATGGGGGGDGGGHGRGRGRGSYRQTVCRHWLRGLCMKGEACGFLHQFDKARMPVCRFFRDYGECREPDCAYKHSYDDVKECNMYKMGFCPNGPNCRYKHVKLPGPPPPVEEVLAKILQMRSSNFNKFNQHRNNNYNQQGDRPRPPPGSGLPNQNSTDNASTMQPAAGQQAQTMNQQPQQKQQQVQQQQKPNTNDQVQGVPNGSSNQPTRLATPLPQGSSRYFIVKSCNRENLEISVQQGIWATQRSNEAKLNEAFESMDNVILIFSINRTRNFQGCAKMTSRIGGYIGGGNWKSANGTAHYGRNFSLQWLKLCELSFQKTHHLRNPYNDNLPVKISRDCQELEPFIGEQLASLLYLEPDSELTAML…	TaCPSF30-4
	TraesCS6B01G167200.1	MDGGDGDGSLRFDFEEDIDAFSFGSGSASSKAPILAVGGPSRGRGHGSIEMDGDEDSLRFDFEDGLDAAGAGTESSAWPFEAPIPAAGGPSHGPGSGSIQMDGDEGSLRFDIEDYLDSVGAGSGSDEEIPECIMFSVGFCLNGPNCKCMHVKLPGPPPVQEVLQKFQQMNAYDYGSSSTTYQPRDNNCKQKAKPQVQHASVLENQNLAVNATLVAQQPAAQHVQTANPPPHLQQQQNAQVQGVHNGSSIQKLPQLQAHFHKGNQGTRLLNVATRRIWILVQWGVCAPQKGLMRLNLTKCVHGQCHFNILHL	TaCPSF30-5
The information of m6A regulators in wheat is sourced from Yue et al., 2019.
Yue, H.; Nie, X.; Yan, Z.; Song, W. N6-methyladenosine regulatory machinery in plants: composition, function and evolution. Plant Biotechnol. J. 2019, 17, 1194–1208. doi:10.1111/pbi.13149
Name codes in red represent the detection of transcripts for m6A regulators in both MeRIP-seq and RNA-seq within this study.

## Sheet: Table S33. Primers
Supplementary Table S33. The primers used in this work
Symbol	Gene ID	Type	primer sequence 5' to 3'
TaVIR-D	TraesCS7D03G0815500	m6A writer	cggCAGTTCTGTTGAGTTCCATCTCTA
			ggGCAAATCCAATCCATGACTTGAGT
TaFIP37-2D	TraesCS7D03G0522600	m6A writer	ggCACATGGATGGCCTAACAAATGAT
			tGTCTTCAGTTGCCTCTTTCTGGC
TaVIR-A	TraesCS7A03G0831400	m6A writer	ggaGCCACAACTTGATAGACTTGCG
			tcggcTTCCATCAACCTTGTCAC
TaHAKAI1-A	TraesCS1A03G0445800	m6A writer	GTTACAAACTCCGCCATCGCC
			gcgAGGCTAAACAGAAAGCATGTTCA
TaALKBH11B	TraesCS4A03G0937300	m6A eraser	GGCAGCGGCGTGTTCTTT
			tcggcTTTATTCTGGTCCTTGGC
TaALKBH4B	TraesCS7A03G0190800	m6A eraser	agcGACCCTGGAGATTGCATC
			GACGAGCACAGACCCAACG
TaECT25	TraesCS3D03G0619400	m6A reader	tcgtggATTACTCTGCTGTGATTCCT
			GCTGCACGCCAACAGGAA
TaECT31	TraesCS4B03G0727800	m6A reader	gTCAGCCTCCTACCCCGATTC
			ggcGGGTCAGTGATGAATTCTGA
TaECT21	TraesCS5A03G1017900	m6A reader	cggccCAACACTGAAAACCAAGAA
			ccgCACAGGGTTTTTCTCTCCAT
TaEF	Q03033	reference gene of Triticum aestivum	TGGTGTCATCAAGCCTGGTATGGT
			ACTCATGGTGCATCTCAACGGACT
PsEF1	KNE93481	reference of Puccinia striiformis	TTCGCCGTCCGTGATATGAGACAA
			ATGCGTATCATGGTGGTGGAGTGA
